# Supplementary material
Source: PubMed Central journal article supplement (PMC2808266)
Supplement: M900396-MCP200_1.pdf [file M900396-MCP200_1.pdf]

## **SUPPLEMENTAL MATERIAL**

### **Supplemental Figures**

**Supplemental Figure 1.** Analysis of purified BCG phagosomes and sham BCG phagosome prepared from J774 cells 1 day post-infection.

**Supplemental Figure 2.** Iodixanol density gradient sedimentation of BCG phagosomes 3 h post-infection of THP-1 cells and analysis of purified 3 h BCG and latex bead phagosomes by Western immunoblotting.

**Supplemental Figure 3.** Analysis of 3-day post nuclear supernate of BCG infected THP-1 cells, purified BCG phagosomes, and purified latex bead phagosomes by Western immunoblotting for IQGAP1 and LAMP2.

**Supplemental Figure 4.** Immunofluorescence of FAM3C and beta-galactosidase in THP-1 cells 3 days after uptake of BCG and latex beads.

### **Supplemental Tables of HPLC-MS/MS Based Protein Identifications**

**Supplemental Table 1.** Summary of proteins identified on BCG and latex bead phagosomes from human THP-1 cells at 3 hours, 1 day, 3 days, and 5 days after uptake.

**Supplemental Table 2.** Proteins identified on a 1-D gel of BCG phagosome from mouse J774 macrophages 1-day post-infection.

**Supplemental Table 3.** Proteins identified on a 2-D gel of BCG phagosome isolated from mouse J774 macrophages 1 day post-infection.

**Supplemental Table 4.** Proteins identified in 3-hour BCG infected human THP-1 phagosome preparation.

**Supplemental Table 5.** Proteins identified in 1-day BCG infected human THP-1 phagosome preparation.

**Supplemental Table 6.** Proteins identified in 3-day BCG infected human THP-1 phagosome preparation (a).

**Supplemental Table 7.** Proteins identified in 3-day BCG infected human THP-1 phagosome preparation (b).

**Supplemental Table 8.** Proteins identified in 5-day BCG infected human THP-1 phagosome preparation.

**Supplemental Table 9.** Proteins identified in 3-hour latex bead human THP-1 phagosome preparation.

**Supplemental Table 10.** Proteins identified in 3-day latex bead human THP-1 phagosome preparation.

**Supplemental Table 11.** Proteins identified in 5-day latex bead human THP-1 phagosome preparation.

**Supplemental Table 12.** Proteins identified by single-peptide based assignments by HPLC-MS/MS in various BCG phagosome preparations and latex bead phagosome preparations from human THP-1 macrophages.

### **Supplemental Document of Single Peptide Based Protein Identifications**

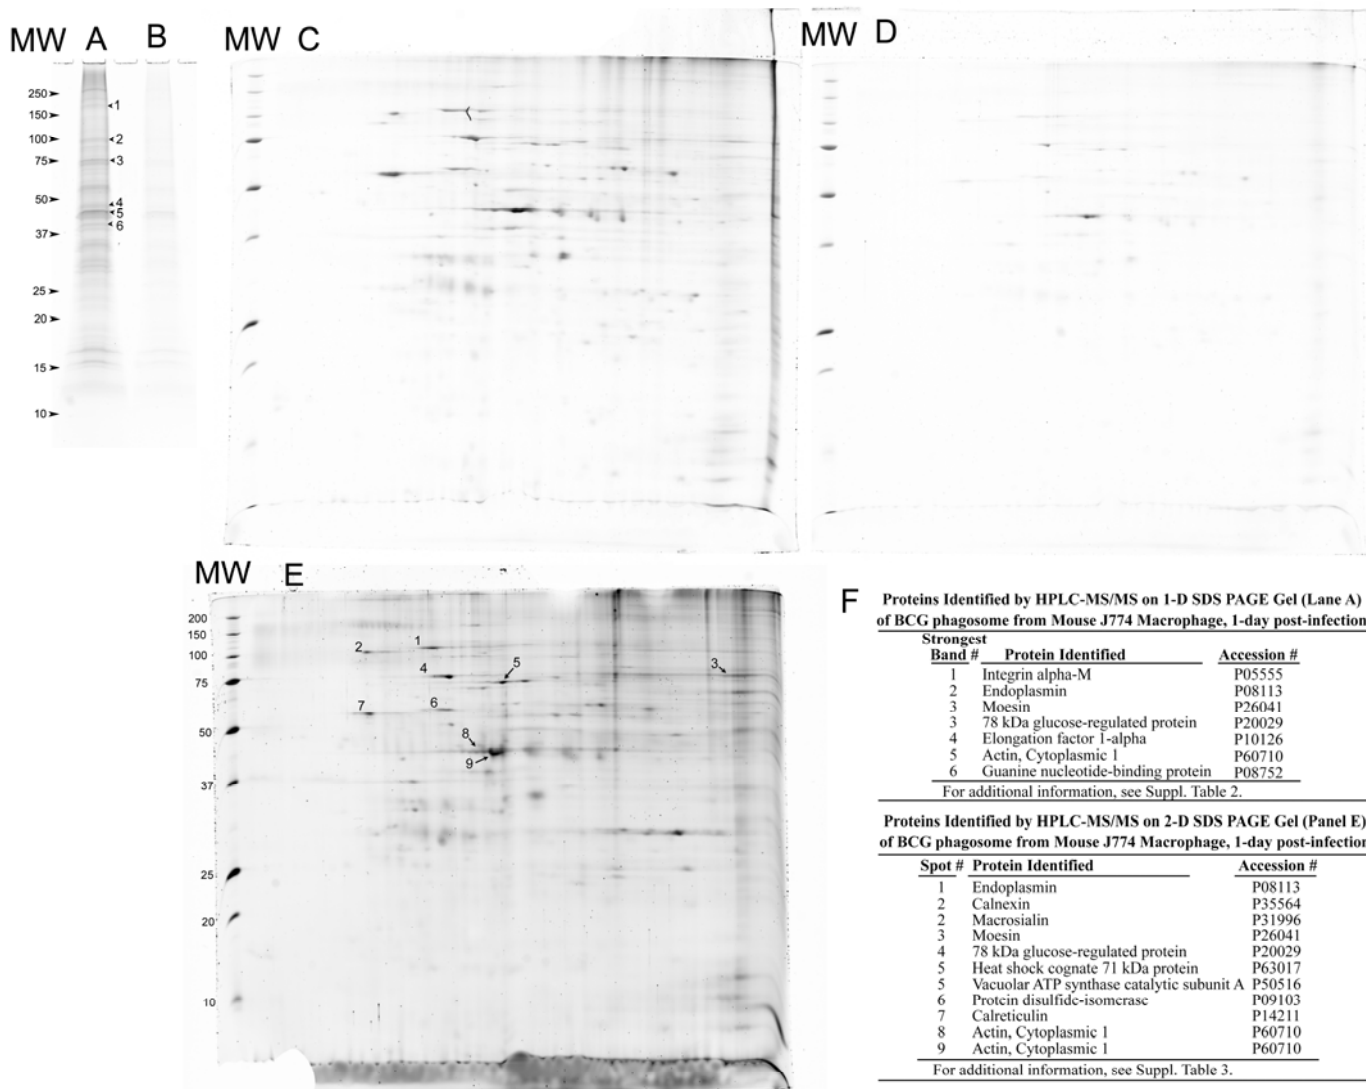

**Supplemental Figure 1. Analysis of purified BCG phagosomes (A, C, E) and sham BCG phagosome (B, D) prepared from J774 cells 1 day post-infection.** Mouse J774 macrophages were infected with *M. bovis* BCG (A, C, E) or left uninfected (B, D), and a phagosomal fraction isolated 1 day post-infection was resolved by 1-D (A, B) and 2-D (C, D, E) polyacrylamide gel electrophoresis and stained for protein by SYPRO ruby. The “sham phagosome” preparation (B, D) was processed identically to the infected phagosome preparation (A, C), except that the *M. bovis* BCG were added to the macrophages after culture and immediately prior to homogenization. The infected phagosome preparations (A, C) have more than 10-fold the protein content of the sham phagosome preparation (B, D), indicating that relatively little extraneous material from the J774 macrophages co-purifies with the BCG phagosomes. The relative positions of standard molecular weight markers are indicated in lanes marked “MW”. Protein bands and spots in the 1-D gel lane (A) and in the 2-D gel (E) were subjected to in-gel tryptic digestion and analyzed by HPLC-MS/MS. Proteins (and their Swiss-Prot accession numbers) identified by ESI-MS/MS in protein bands and spots indicated by numbered arrows in the 1-D gel lane (A) and in the 2-D gel (E), respectively, are listed in the Table (F). Additional details regarding protein identification in the 1-D and 2-D gel are provided in Supplemental Tables 2 and 3, respectively.

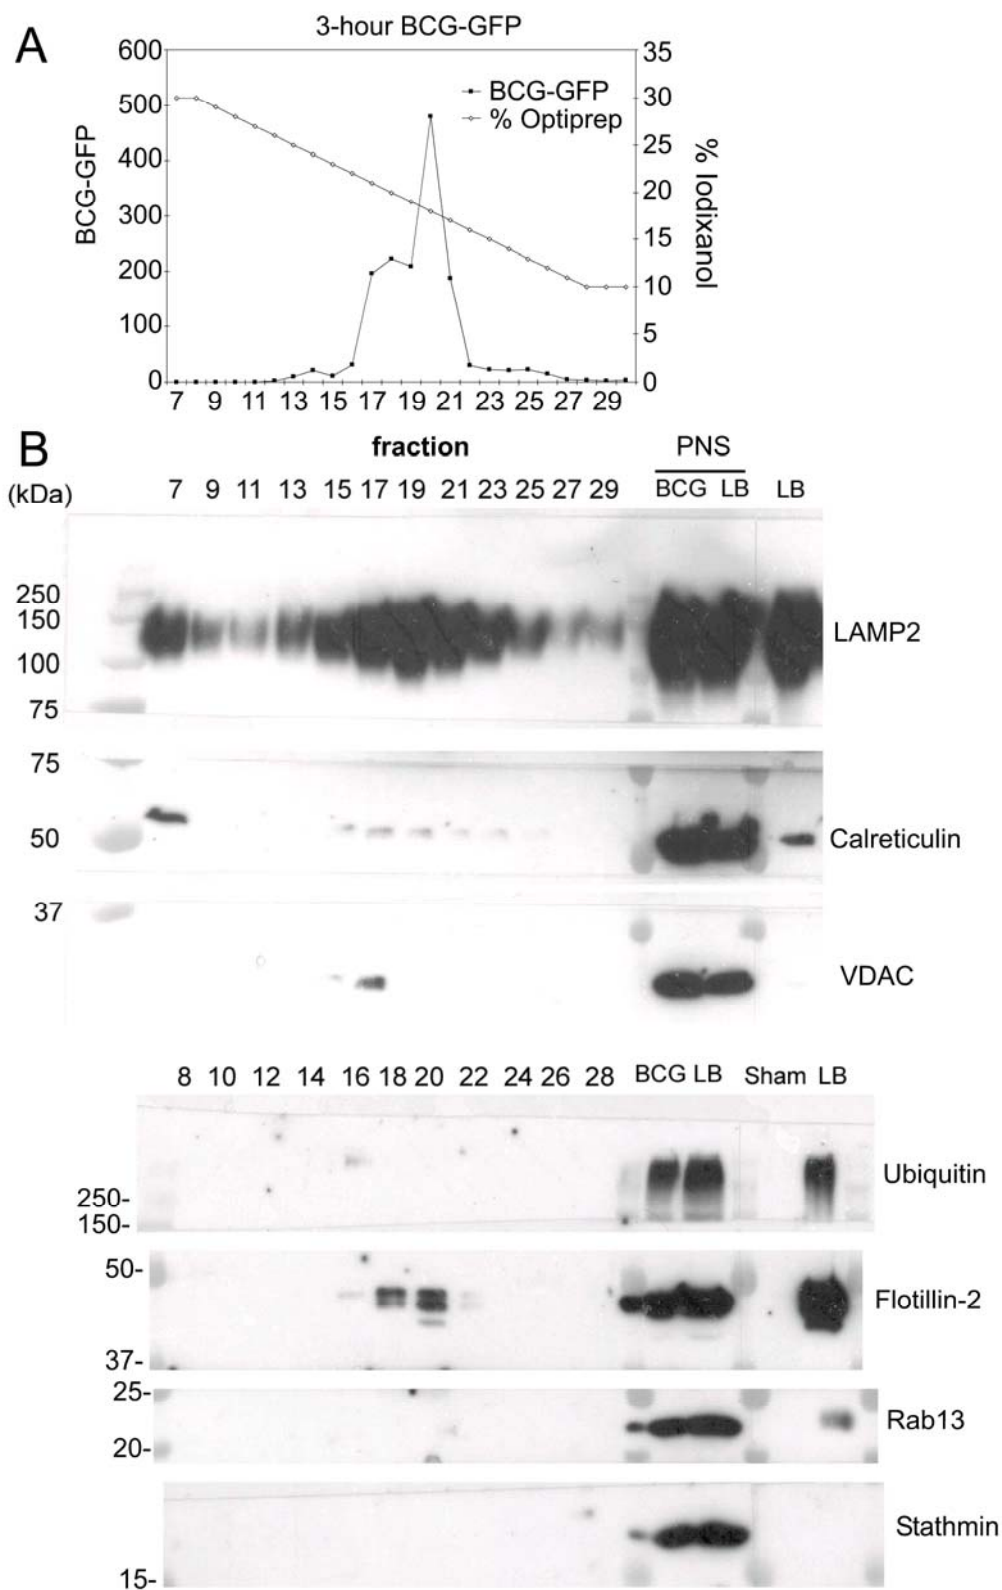

**Supplemental Figure 2. Iodixanol density gradient sedimentation of BCG phagosomes 3 h post-infection of THP-1 cells (A) and analysis of purified 3 h BCG and latex bead phagosomes by Western immunoblotting (B).** Equal numbers of human THP-1 macrophages were allowed to phagocytose live *M. bovis* BCG-GFP or latex beads, or left untreated (“sham”) and a phagosomal

### **Supplemental Figure 2 (continued):**

fraction purified 3 h post-infection. The “sham phagosome” preparation was processed identically to the BCG phagosome preparations except that BCG was added to the macrophages after culture and immediately prior to homogenization. Macrophages from all preparations were homogenized; post-nuclear supernatant (PNS) fractions obtained by low speed centrifugation; and a phagosomal fraction obtained by centrifugation through 15% sucrose onto 30% iodixanol. The latex bead phagosomes were purified by flotation on a sucrose step gradient (not shown) and the BCG phagosomes were centrifuged through a 15% sucrose cushion, followed by density gradient centrifugation on a linear 10-30% iodixanol gradient (A). The relative number of BCG-GFP per gradient fraction was determined by mixing equal aliquots of each fraction with formaldehyde and counting the number of green fluorescent bacteria per 400 x field by fluorescence microscopy. Gradient fractions were collected from the bottom and aliquots representing equal fractions of the iodixanol gradient or the PNS (0.06% of the entire gradient or 0.06% of the total PNS, respectively) were analyzed by 1-D SDS PAGE and Western immunoblotting (B). The majority of BCG phagosomes eluted in fractions 19-21, together with a strong band of LAMP2 immunostaining. In contrast, as can be seen by comparing the intensity of immunostaining of the PNS with the intensity of immunostaining of fractions from the iodixanol gradient, the majority of ER (represented by calreticulin immunostaining) and mitochondria (represented by VDAC immunostaining) were removed at the 15% sucrose gradient step and were not applied to the iodixanol gradient. Some remaining ER and mitochondria eluted on the iodixanol gradient in denser fractions (fraction 7 and 15 – 17, respectively), and a relatively weak band of calreticulin staining co-eluted with the BCG phagosomes. Whereas a high molecular weight form of ubiquitin is present in abundance in the latex bead phagosome and PNS, it is relatively depleted on the 3 h BCG phagosome. Flotillin-2 is highly enriched on the latex bead phagosome, but less abundant on the BCG phagosome. Rab13 is detected on the latex bead phagosome but not the BCG phagosome gradient. The cytoskeletal protein, stathmin, is detected in the PNS but not in the BCG gradient or in the latex bead phagosome pellet.

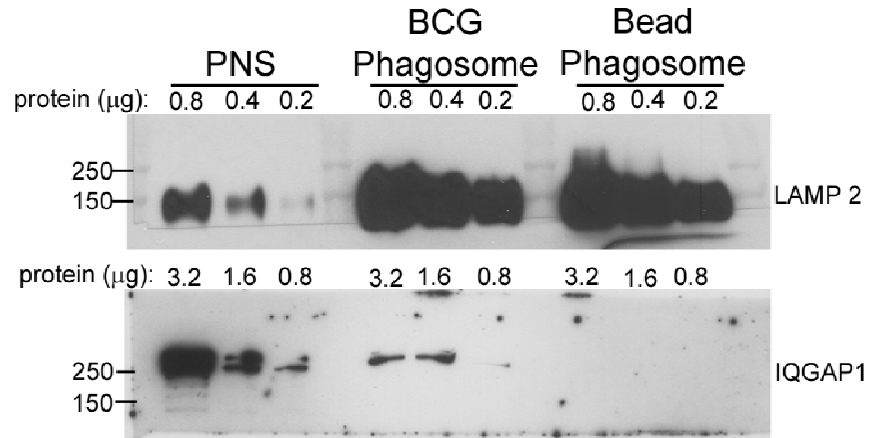

**Supplemental Figure 3. Analysis of 3 day purified BCG phagosomes, latex bead phagosomes, and PNS by Western immunoblotting.** Samples containing 0.8 μg – 3.2 μg of protein of purified BCG phagosomes, purified latex bead phagosomes, or the PNS, prepared from THP-1 cells 3 days post infection were separated by SDS-PAGE and electrophoretically transferred to a nitrocellulose membrane. The membrane was incubated with mouse monoclonal antibodies specific for LAMP2 and IQGAP1 followed by HRP-conjugated goat anti-mouse IgG secondary antibody, and developed with SuperSignal West Femto Maximum Sensitivity chemiluminescent substrate (Pierce), and the signal from immunoreactive protein bands detected by exposing the membrane to X-ray film. LAMP2 is enriched on both the BCG phagosomes and the latex bead phagosomes relative to the levels observed in the PNS. In contrast, IQGAP1 is more abundant in the PNS than in the purified phagosomes. Whereas IQGAP1 is detected on the purified BCG phagosomes, it is not detected on the purified latex bead phagosomes with comparable amounts of protein loading.

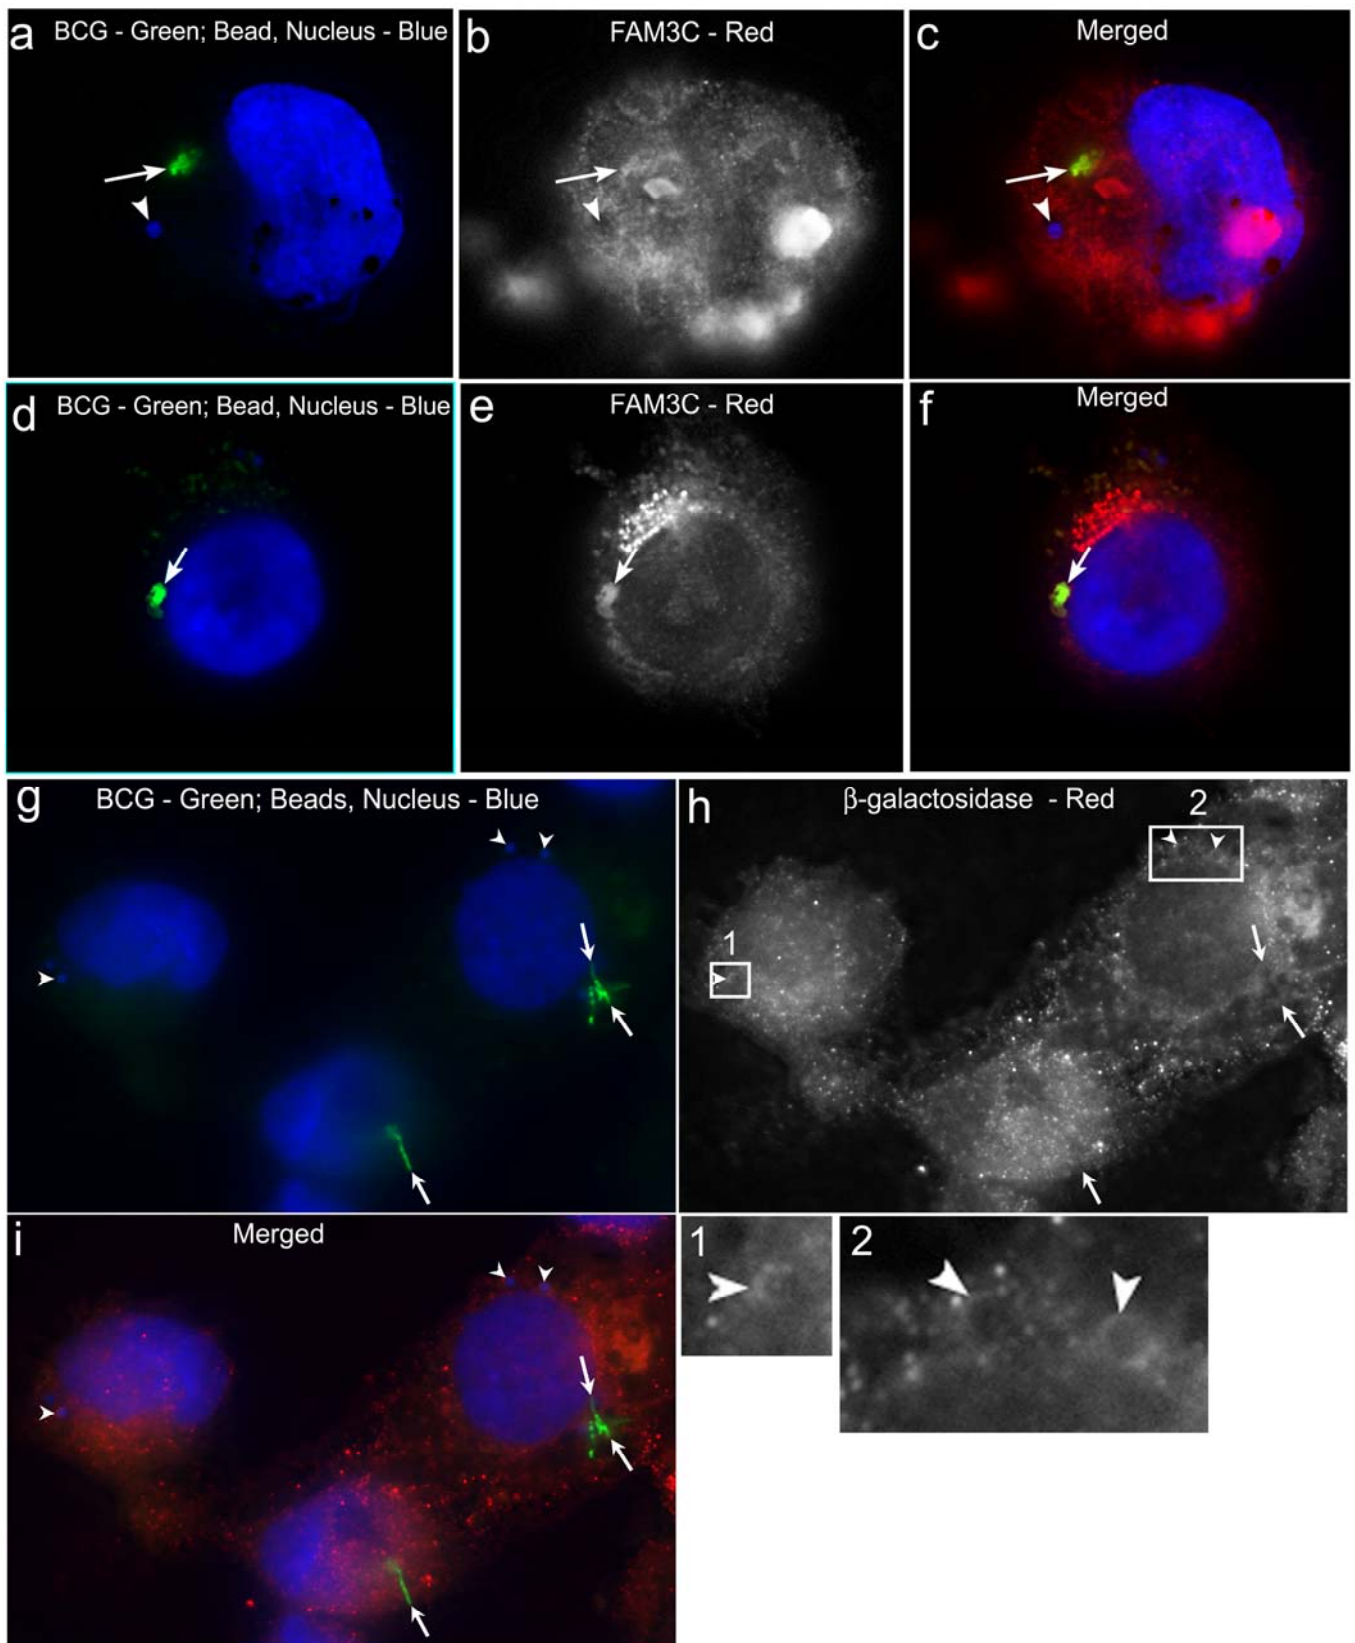

**Supplemental Figure 4. Immunofluorescence of FAM3C and beta-galactosidase in THP-1 cells 3 days after uptake of BCG and latex beads.** THP-1 cells, 3 days after uptake of BCG and latex beads, were fixed in 4% paraformaldehyde, heated to 95°C for 20 min in antigen retrieval buffer (5% urea, 100

**Supplemental Figure 4 (continued):**

mM Tris-HCl, pH 9.5), permeabilized with 0.1% saponin, and evaluated by immunofluorescence for FAM3C (a – f) and beta-galactosidase (g – i) using monoclonal antibodies specific for these proteins. Bacteria (arrows) were visualized by green fluorescence with an Oregon green-labeled rabbit anti-LAM antibody (a, d, g). Host nuclei [stained by DAPI (a, d, g)] and latex beads (arrowheads, a, g) were identified by blue fluorescence. FAM3C (b, e) and beta-galactosidase distribution (h) was visualized by staining with Texas red conjugated antibodies (red channel shown in black and white in panels b, e, h). The merged color images are shown on the right (c, f, i). FAM3C colocalizes with the BCG phagosomes (arrows, b, e) but not with the latex bead phagosomes (arrowhead, b). In contrast, beta-galactosidase colocalizes with the latex bead phagosomes (arrowheads, h and insets shown below at higher magnification for areas 1 and 2) but not with the BCG phagosomes (arrows, h). Quantitative analysis of the immunofluorescence revealed that FAM3C colocalized with  $96\% \pm 4\%$  of BCG and  $17\% \pm 1\%$  of latex bead phagosomes, and that beta-galactosidase colocalized with  $4\% \pm 4\%$  of the BCG and  $69\% \pm 2\%$  of the latex bead phagosomes (mean  $\pm$  standard error).

**Supplemental Table 1.** Proteins identified on BCG and latex bead phagosomes from human THP-1 cells at 3 hours, 1 day, 3 days, and 5 days after uptake.

For each of the individual phagosome experiments listed below the number of unique peptides identified for each protein are indicated. The summary columns ("total # BCG" and "total # beads") lists the number of preparations in which the protein was identified. "[1]" indicates that the identification of the protein was based on a single peptide assignment. For details see Supplemental Tables 4-12.

Spectral and Peptide Counts are listed: Spectral counts refer to all acquired precursor ions for a particular protein while peptide counts only list the number of unique peptide sequences observed per protein. (\*)

| #  | Protein Identified**                                    | SwissProt Accession # | BCG                      |            |            |            |            | beads                    |             |             | total # BCG | total # beads | Reported location                                 | Physiological Function                                                                                                             |
|----|---------------------------------------------------------|-----------------------|--------------------------|------------|------------|------------|------------|--------------------------|-------------|-------------|-------------|---------------|---------------------------------------------------|------------------------------------------------------------------------------------------------------------------------------------|
|    |                                                         |                       | (Spectral/Peptide Count) |            |            |            |            | (Spectral/Peptide Count) |             |             |             |               |                                                   |                                                                                                                                    |
|    |                                                         |                       | 3 h                      | 1 day      | 3 days (a) | 3 days (b) | 5 days     | 3 h                      | 3 days      | 5 days      |             |               |                                                   |                                                                                                                                    |
|    |                                                         |                       | Suppl T. 4               | Suppl T. 5 | Suppl T. 6 | Suppl T. 7 | Suppl T. 8 | Suppl T. 9               | Suppl T. 10 | Suppl T. 11 |             |               |                                                   |                                                                                                                                    |
| 1  | 60 kDa heat shock protein, mitochondrial                | P10809                | 9/9                      | 19/19      | 15/14      | 2/2        | 18/18      | 12/12                    | 16/16       | 5/5         | 5           | 3             | Mitochondrion, Secretory granules                 | Chaperone. Extra-mitochondrial localization reported (Brudzynski et al. 1992a,b; Cechetto et al. 2000).                            |
| 2  | 78 kDa glucose-regulated protein                        | P11021                | 5/5                      | 16/16      | 6/6        | 8/8        | 13/13      | 5/5                      | 8/8         | 16/16       | 5           | 3             | Endoplasmic reticulum (ER), Melanosome            | Chaperone. Member of heat shock protein 70 family.                                                                                 |
| 3  | Aminopeptidase N                                        | P15144                | 13/13                    | 8/8        | 31/20      | 20/20      | 21/21      | 9/9                      | 17/12       | 9/9         | 5           | 3             | Plasma membrane (PM)                              | Protein degradation.                                                                                                               |
| 4  | ATP synthase subunit alpha, mitochondrial               | P25705                | 13/13                    | 12/12      | 2/2        | 4/4        | 6/6        | 9/9                      | 7/7         | 2/2         | 5           | 3             | Mitochondrion inner membrane                      | Ion transport. Generation of ATP.                                                                                                  |
| 5  | Calnexin                                                | P27824                | [1]/[1]                  | 2/2        | 2/2        | [1]/[1]    | 2/2        | [1]/[1]                  | [1]/[1]     | 3/3         | 5           | 3             | ER                                                | Chaperone. Protein folding.                                                                                                        |
| 6  | Endoplasmic reticulum chaperone                         | P14625                | 4/4                      | 11/11      | 10/10      | 14/14      | 13/13      | 9/8                      | 10/9        | 14/13       | 5           | 3             | ER                                                | Chaperone. Protein folding.                                                                                                        |
| 7  | Integrin beta-2                                         | P05107                | 5/5                      | 7/7        | 8/8        | 6/6        | 12/12      | 3/3                      | 2/2         | 2/2         | 5           | 3             | PM                                                | Cell surface adhesion glycoprotein.                                                                                                |
| 8  | Lysosome membrane protein 2                             | Q14108                | 15/13                    | 3/3        | 9/9        | 12/12      | 3/3        | 12/11                    | 5/5         | 2/2         | 5           | 3             | Lysosome                                          | Lysosomal receptor. Scavenger receptor class B member 2.                                                                           |
| 9  | Lysosome-associated membrane glycoprotein 1             | P11279                | 4/4                      | 2/2        | 4/3        | 6/6        | 3/3        | 4/4                      | 3/3         | 2/2         | 5           | 3             | Lysosome, Endosome, PM                            | Present carbohydrate ligands to selectins.                                                                                         |
| 10 | Lysosome-associated membrane glycoprotein 2             | P13473                | 3/3                      | [1]/[1]    | 4/3        | 2/2        | 2/2        | 3/2                      | 5/3         | [1]/[1]     | 5           | 3             | Lysosome, Endosome, PM                            | Protect lysosomal membrane from autodigestion.                                                                                     |
| 11 | Moesin                                                  | P26038                | 3/3                      | 8/8        | 3/3        | 9/9        | 12/12      | 4/4                      | 7/7         | 14/14       | 5           | 3             | Cytoplasm                                         | Connections of membrane to cytoskeleton.                                                                                           |
| 12 | Peroxisome oxidoreductin-1                              | Q06830                | [1]/[1]                  | 2/2        | 2/2        | 6/5        | 8/7        | 2/2                      | [1]/[1]     | 11/10       | 5           | 3             | Cytoplasm, Melanosome                             | Redox regulation. Detoxification.                                                                                                  |
| 13 | Protein disulfide-isomerase                             | P07237                | 3/3                      | 2/2        | 5/5        | 9/9        | 7/7        | 2/2                      | 7/7         | 11/11       | 5           | 3             | ER                                                | Disulfide bond rearrangement.                                                                                                      |
| 14 | Protein disulfide-isomerase A3                          | P30101                | [1]/[1]                  | 2/2        | 10/10      | 9/9        | 10/10      | 2/2                      | 7/6         | 7/7         | 5           | 3             | ER                                                | Disulfide bond rearrangement.                                                                                                      |
| 15 | Putative elongation factor 1-alpha-like 3               | Q5VTE0                | 2/2                      | 5/5        | 4/4        | 3/3        | 5/5        | 4/4                      | 8/7         | 7/5         | 5           | 3             | Cytoplasm                                         | Promotes GTP-dependent binding of aminoacyl-tRNA to the A-site of ribosomes during protein biosynthesis (by similarity).           |
| 16 | Ras-related protein Rab-5C                              | P51148                | 4/4                      | 4/4        | 5/5        | 8/7        | 3/3        | 4/4                      | 6/5         | [1]/[1]     | 5           | 3             | Early endosome                                    | Vesicular trafficking.                                                                                                             |
| 17 | Acid ceramidase                                         | Q13510                | 2/2                      | [1]/[1]    | 2/2        | 2/2        | 2/2        | 2/2                      | 2/2         | 0           | 5           | 2             | Lysosome                                          | Hydrolyzes the sphingolipid ceramide into sphingosine and free fatty acid.                                                         |
| 18 | CD63 antigen                                            | P08962                | 2/2                      | 4/4        | 2/2        | 3/3        | 2/2        | 3/3                      | 4/3         | 0           | 5           | 2             | Late endosome-Lysosome                            | Unknown. May regulate transport of other proteins.                                                                                 |
| 19 | Coronin-1A                                              | P31146                | 2/2                      | [1]/[1]    | 3/3        | 3/3        | 2/2        | 0                        | 4/3         | 4/4         | 5           | 2             | Cytoplasm                                         | Cytoskeleton component. Important in membrane invaginations, protrusions, and cell locomotion.                                     |
| 20 | Erythrocyte band 7 integral membrane protein (Stomatin) | P27105                | [1]/[1]                  | 2/2        | 2/2        | 3/3        | 4/4        | 6/6                      | 6/6         | 0           | 5           | 2             | PM, Melanosome                                    | Regulate cation conductance. Associates with actin and lipid rafts.                                                                |
| 21 | Flotillin-1                                             | O75955                | 3/3                      | [1]/[1]    | 7/7        | [1]/[1]    | [1]/[1]    | 4/3                      | 9/9         | 0           | 5           | 2             | PM, Phagosomal membrane                           | Lipid rafts. Clathrin independent endocytosis. Formation of caveolae or caveolae-like vesicles.                                    |
| 22 | Fructose-bisphosphate aldolase A                        | P04075                | 3/3                      | 8/8        | 5/5        | 14/12      | 15/15      | 4/4                      | 0           | 14/13       | 5           | 2             | Cytoplasm                                         | Metabolism. Interacts with cytoskeleton (Schindler et al., 2001).                                                                  |
| 23 | Heat shock protein HSP 90-beta                          | P08238                | 5/5                      | 10/10      | 16/14      | 22/22      | 10/10      | 3/3                      | 0           | 18/17       | 5           | 2             | Cytoplasm, Melanosome                             | Chaperone.                                                                                                                         |
| 24 | Proactivator polypeptide (Prosaposin)                   | P07602                | 4/4                      | [1]/[1]    | 2/2        | 4/4        | [1]/[1]    | 3/3                      | 3/3         | 0           | 5           | 2             | Lysosome                                          | Sphingolipid degradation.                                                                                                          |
| 25 | Ras-related protein Rab-11B*                            | Q15907*               | [1]/[1]                  | 2/2        | 2/2        | [1]/[1]    | [1]/[1]    | [1]/[1]                  | [1]/[1]     | 0           | 5           | 2             | Recycling endosome, PM                            | Regulation of endosomal recycling.                                                                                                 |
| 26 | Stress-70 protein, mitochondrial                        | P38646                | 12/12                    | 3/3        | 8/8        | 5/5        | 4/4        | 2/2                      | 6/6         | 0           | 5           | 2             | Mitochondrion, Cell surface                       | Chaperone. Control of cell proliferation and cellular aging.                                                                       |
| 27 | Thioredoxin-dependent peroxide reductase, mitochondrial | P30048                | 2/1                      | [1]/[1]    | [1]/[1]    | [1]/[1]    | [1]/[1]    | [1]/[1]                  | [1]/[1]     | 0           | 5           | 2             | Mitochondrion, Early endosome                     | Redox regulation. Presence in endosomes described by Liu et al., 2005.                                                             |
| 28 | Vacuolar ATP synthase subunit B                         | P21281                | 10/10                    | 2/2        | 3/3        | 7/7        | 2/2        | 8/8                      | 15/11       | 0           | 5           | 2             | Endosome-Lysosome                                 | Compartment acidification.                                                                                                         |
| 29 | Actin-related protein 2                                 | P61160                | 2/2                      | [1]/[1]    | 2/2        | 2/2        | [1]/[1]    | 0                        | [1]/[1]     | 0           | 5           | 1             | Cytoplasm                                         | Cytoskeleton.                                                                                                                      |
| 30 | ATP synthase subunit beta, mitochondrial                | P06576                | 6/6                      | 9/9        | 14/14      | 3/3        | 10/9       | 0                        | 0           | 2/2         | 5           | 1             | Mitochondrion, PM                                 | Generation of ATP. Reported in lipid rafts of PM (Bae et al. 2004) and to function on PM as estrogen receptor (Park et al., 2004). |
| 31 | Heat shock protein beta-1                               | P04792                | 3/3                      | 5/5        | [1]/[1]    | 4/4        | 6/5        | 0                        | 0           | 5/3         | 5           | 1             | Cytoplasm                                         | Cytoskeleton. Stress resistance and actin organization.                                                                            |
| 32 | Integrin beta-1                                         | P05556                | 2/2                      | 2/2        | 3/3        | 5/5        | [1]/[1]    | 2/2                      | 0           | 0           | 5           | 1             | PM                                                | Receptor for fibronectin.                                                                                                          |
| 33 | Actin, cytoplasmic 1                                    | P60709                | 5/5                      | 0          | 16/12      | 16/13      | 49/16      | 3/3                      | 2/2         | 18/13       | 4           | 3             | Cytoplasm                                         | Cytoskeleton.                                                                                                                      |
| 34 | Annexin A2                                              | P07355                | 5/5                      | 0          | 4/4        | 9/9        | 9/9        | 15/13                    | 8/6         | 5/5         | 4           | 3             | Secreted, Extracellular Matrix, Basement Membrane | May cross-link plasma membrane phospholipids with actin cytoskeleton and be involved with exocytosis.                              |
| 35 | Brain acid soluble protein 1                            | P80723                | 4/4                      | 0          | 6/5        | 3/3        | 4/4        | 3/3                      | 5/5         | [1]/[1]     | 4           | 3             | Membrane                                          | Signaling. Has calmodulin binding site. Is substrate for PKC. Present in lipid rafts. Regulation of actin dynamics.                |
| 36 | Cathepsin D                                             | P07339                | 6/5                      | 0          | 5/5        | 8/8        | 9/8        | 9/8                      | 15/11       | 5/5         | 4           | 3             | Lysosome                                          | Protein degradation.                                                                                                               |



|    |                                                          |         |         |         |         |         |         |         |         |         |   |   |                                                   |                                                                                                                                                            |
|----|----------------------------------------------------------|---------|---------|---------|---------|---------|---------|---------|---------|---------|---|---|---------------------------------------------------|------------------------------------------------------------------------------------------------------------------------------------------------------------|
| 37 | Glyceraldehyde-3-phosphate dehydrogenase                 | P04406  | 2/2     | 0       | 3/3     | 3/3     | 7/7     | 3/3     | 3/3     | 5/5     | 4 | 3 | Cytoplasm, membrane associated                    | Glycolysis. Membrane fusion. Microtubule bundling. Phosphotransferase activity. Nuclear RNA export. DNA replication and DNA repair (Sirover, 1999).        |
| 38 | Heat shock cognate 71 kDa protein                        | P11142  | 6/6     | 0       | 9/9     | 22/22   | 8/8     | 3/3     | 5/5     | 11/11   | 4 | 3 | Cytoplasm, Melanosome                             | Chaperone.                                                                                                                                                 |
| 39 | Palmitoyl-protein thioesterase 1                         | P50897  | 3/3     | 0       | 3/3     | 3/3     | 4/4     | 4/4     | 6/5     | [1]/[1] | 4 | 3 | Lysosome                                          | Lipoprotein degradation.                                                                                                                                   |
| 40 | Plastin-2                                                | P13796  | 0       | 10/10   | 2/2     | 12/12   | 14/14   | 2/2     | 3/3     | 11/11   | 4 | 3 | Cytoplasm                                         | Cytoskeleton.                                                                                                                                              |
| 41 | Ras-related protein Rab-7A                               | P51149  | 2/2     | 0       | 5/5     | 4/4     | 7/7     | 3/3     | 3/3     | 2/2     | 4 | 3 | Late endosome                                     | Late endosomal transport, phagosome maturation.                                                                                                            |
| 42 | Vacuolar ATP synthase catalytic subunit A                | P38606  | 3/3     | 0       | [1]/[1] | 7/7     | 4/4     | 4/4     | 12/10   | [1]/[1] | 4 | 3 | Endosome-Lysosome                                 | Compartment acidification.                                                                                                                                 |
| 43 | Vimentin                                                 | P08670  | 0       | 5/5     | 9/9     | 2/2     | 5/5     | 7/7     | 8/8     | [1]/[1] | 4 | 3 | Cytoplasm                                         | Cytoskeleton. Intermediate filament.                                                                                                                       |
| 44 | Voltage-dependent anion-selective channel protein 1      | P21796  | 4/4     | 0       | 2/[1]   | 5/5     | 7/7     | 2/2     | 3/3     | 5/5     | 4 | 3 | Mitochondrion, PM                                 | Channel for small hydrophilic molecules, present in secretory pathway and PM (Buettner et al. 2000).                                                       |
| 45 | Voltage-dependent anion-selective channel protein 2      | P45880  | 2/2     | 0       | 3/3     | 2/2     | 5/5     | 2/2     | [1]/[1] | 2/2     | 4 | 3 | Mitochondrion                                     | Channel for small hydrophilic molecules.                                                                                                                   |
| 46 | 10 kDa heat shock protein, mitochondrial                 | P61604  | 6/6     | 6/5     | 4/4     | 4/4     | 0       | 3/3     | 5/5     | 0       | 4 | 2 | Mitochondrion, and non-mitochondrial sites        | Co-chaperone for Hsp60 in the protein folding process. Also identified in non-mitochondrial sites, including secretory granules (Sadacharan et al., 2001). |
| 47 | 40S ribosomal protein SA (laminin receptor-1)            | P08865  | 0       | [1]/[1] | 2/[1]   | 3/3     | 5/5     | 0       | [1]/[1] | 3/3     | 4 | 2 | Cytoplasm                                         | Protein synthesis. Cell adhesion (Nelson et al. 2008).                                                                                                     |
| 48 | ADP-ribosylation factor-like protein 8B*                 | Q9NVJ2* | 3/3     | [1]/[1] | [1]/[1] | [1]/[1] | 0       | 2/2     | [1]/[1] | 0       | 4 | 2 | Late endosome-Lysosome                            | Endosome and lysosome motility.                                                                                                                            |
| 49 | Alpha-enolase                                            | P06733  | 0       | [1]/[1] | 2/2     | 6/6     | 7/7     | [1]/[1] | 0       | 3/3     | 4 | 2 | Cytoplasm, PM, Myofibril, Sarcomere               | Carbohydrate degradation. Glycolysis. Promotes vacuole fusion in yeast. May also function as a plasminogen receptor and activator on the cell surface.     |
| 50 | Cathepsin Z                                              | Q9UBR2  | 3/3     | 0       | [1]/[1] | 3/3     | 2/2     | 2/2     | 2/2     | 0       | 4 | 2 | Lysosome                                          | Carboxy-dipeptidase.                                                                                                                                       |
| 51 | Cofilin-1                                                | P23528  | [1]/[1] | 2/2     | 0       | 2/2     | [1]/[1] | [1]/[1] | 0       | 2/2     | 4 | 2 | Cytoplasm                                         | Controls actin polymerization.                                                                                                                             |
| 52 | Gelsolin                                                 | P06396  | 0       | [1]/[1] | 2/2     | 8/8     | 5/5     | [1]/[1] | 0       | 7/7     | 4 | 2 | Cytoplasm                                         | Cytoskeleton.                                                                                                                                              |
| 53 | Hypoxia up-regulated protein 1                           | Q9Y4L1  | 0       | 2/1     | [1]/[1] | 2/2     | 7/7     | [1]/[1] | 0       | 3/3     | 4 | 2 | ER lumen                                          | Chaperone, induced by hypoxia.                                                                                                                             |
| 54 | Lysosomal acid phosphatase                               | P11117  | 0       | [1]/[1] | 2/2     | [1]/[1] | 3/3     | 3/3     | 5/5     | 0       | 4 | 2 | Lysosome                                          | Phosphate monoester hydrolysis.                                                                                                                            |
| 55 | Lysosomal alpha-glucosidase                              | P10253  | 2/2     | 0       | 2/2     | [1]/[1] | [1]/[1] | 3/3     | 2/2     | 0       | 4 | 2 | Lysosome                                          | Glycogen degradation.                                                                                                                                      |
| 56 | Malate dehydrogenase, mitochondrial                      | P40926  | 11/11   | 0       | 6/5     | 2/2     | 8/8     | 5/5     | 5/5     | 0       | 4 | 2 | Mitochondrion                                     | Glycolysis. Tricarboxylic acid cycle.                                                                                                                      |
| 57 | Myosin-9                                                 | P35579  | 0       | 14/14   | 5/5     | 29      | 15      | 0       | 7/7     | 34/34   | 4 | 2 | Cytoplasm                                         | Cytoskeleton.                                                                                                                                              |
| 58 | N-acetylglucosamine-6-sulfatase                          | P15586  | 8/8     | [1]/[1] | [1]/[1] | 3/3     | 0       | 3/3     | 2/2     | 0       | 4 | 2 | Lysosome                                          | Heparan sulfate/keratan sulfate hydrolysis.                                                                                                                |
| 59 | Nicastrin                                                | Q92542  | 2/2     | [1]/[1] | 2/2     | 2/2     | 0       | 4/4     | 3/3     | 0       | 4 | 2 | Golgi, ER, PM, Melanosome                         | Component of the gamma-secretase complex.                                                                                                                  |
| 60 | Protein disulfide-isomerase A6                           | Q15084  | 0       | 3/3     | [1]/[1] | 4/4     | 6/6     | [1]/[1] | 0       | 2/2     | 4 | 2 | ER, ER-Golgi intermediate compartment, Melanosome | Disulfide bond rearrangement.                                                                                                                              |
| 61 | Ras-related protein Rab-21                               | Q9UL25  | [1]/[1] | 0       | 2/2     | 2/2     | [1]/[1] | [1]/[1] | 2/2     | 0       | 4 | 2 | Endosomes                                         | Controls traffic of beta-1 integrins.                                                                                                                      |
| 62 | Sulfide:quinone oxidoreductase, mitochondrial            | Q9Y6N5  | 2/2     | 0       | 6/6     | 4/4     | 6/6     | 2/2     | 2/2     | 0       | 4 | 2 | Mitochondrion                                     | Hydrogen sulfide oxidation.                                                                                                                                |
| 63 | Vacuolar proton pump subunit d 1                         | P61421  | 3/3     | 0       | 6/5     | 5/5     | [1]/[1] | 4/4     | 5/4     | 0       | 4 | 2 | Intracellular compartments, Endosome-Lysosome     | Compartment acidification.                                                                                                                                 |
| 64 | Citrate synthase, mitochondrial                          | O75390  | [1]/[1] | 0       | [1]/[1] | [1]/[1] | [1]/[1] | [1]/[1] | [1]/[1] | 0       | 4 | 2 | Mitochondrion                                     | Carbohydrate metabolism, tricarboxylic acid cycle.                                                                                                         |
| 65 | Interferon-induced transmembrane protein 3*              | Q01628* | [1]/[1] | [1]/[1] | [1]/[1] | [1]/[1] | 0       | [1]/[1] | [1]/[1] | 0       | 4 | 2 | PM, Golgi, integral membrane protein              | Cell differentiation and homing, immune response.                                                                                                          |
| 66 | 2,4-dienoyl-CoA reductase, mitochondrial                 | Q16698  | 5/4     | 0       | 4/4     | [1]/[1] | 4/4     | 0       | 2/2     | 0       | 4 | 1 | Mitochondrion                                     | Beta-oxidation of unsaturated fatty acids.                                                                                                                 |
| 67 | Adenylyl cyclase-associated protein 1                    | Q01518  | 0       | 4/4     | 13/13   | 13/13   | 21/16   | 0       | 0       | 23/22   | 4 | 1 | Membrane, PM                                      | Signaling. Binds actin monomers and directly regulates filament dynamics.                                                                                  |
| 68 | Alpha-actinin-1                                          | P12814  | 0       | 4/4     | 4/4     | 11/11   | 5/5     | 0       | 0       | 6/6     | 4 | 1 | Cytoplasm                                         | Cross links actin. F-actin assembly.                                                                                                                       |
| 69 | Alpha-actinin-4                                          | O43707  | 0       | 5/5     | 3/3     | 7/7     | 3/3     | 0       | 0       | 4/4     | 4 | 1 | Cytoplasm                                         | Cross links actin. F-actin assembly.                                                                                                                       |
| 70 | Annexin A5                                               | P08758  | [1]/[1] | 0       | 2/[1]   | 2/2     | 6/6     | 0       | 0       | [1]/[1] | 4 | 1 | Cytoplasm                                         | Calcium-dependent phospholipid binding.                                                                                                                    |
| 71 | Basigin                                                  | P35613  | 0       | [1]/[1] | 2/2     | [1]/[1] | 2/2     | 0       | 0       | [1]/[1] | 4 | 1 | PM, Melanosome                                    | May be a receptor for oligomannosidic glycans. May be associated with a monocarboxylate transporter.                                                       |
| 72 | D-3-phosphoglycerate dehydrogenase                       | O43175  | 0       | 4/4     | 3/3     | 5/5     | 6/6     | 0       | 0       | 8/8     | 4 | 1 | Cytoplasm                                         | Metabolism. Amino acid biosynthesis.                                                                                                                       |
| 73 | Dipeptidyl-peptidase 2                                   | Q9UHL4  | 5/5     | 4/4     | [1]/[1] | [1]/[1] | 0       | 3/3     | 0       | 0       | 4 | 1 | Cytoplasmic vesicles, Lysosome                    | N-terminal dipeptidase.                                                                                                                                    |
| 74 | Ezrin                                                    | P15311  | [1]/[1] | 2/2     | 3/3     | 6/6     | 0       | 0       | 3/3     | 0       | 4 | 1 | Membrane                                          | Interaction of cytoskeleton with membrane.                                                                                                                 |
| 75 | Heat shock protein HSP 90-alpha                          | P07900  | 0       | 6/6     | 14/12   | 16/16   | 7/7     | 0       | 0       | 13/13   | 4 | 1 | Cytoplasm                                         | Chaperone.                                                                                                                                                 |
| 76 | Leucine-rich PPR motif-containing protein, mitochondrial | P42704  | 12/12   | 4/4     | 4/4     | 0       | 2/2     | 4/4     | 0       | 0       | 4 | 1 | Mitochondrion, Nucleus                            | May play a role in RNA metabolism in both nuclei and mitochondria. Binds RNA, DNA, and beta-tubulin.                                                       |

|     |                                                                                |         |         |         |         |         |         |         |         |         |   |   |                                                    |                                                                                                                              |
|-----|--------------------------------------------------------------------------------|---------|---------|---------|---------|---------|---------|---------|---------|---------|---|---|----------------------------------------------------|------------------------------------------------------------------------------------------------------------------------------|
| 77  | Macrophage-capping protein                                                     | P40121  | 0       | 2/2     | [1]/[1] | 6/6     | 9/8     | 0       | 0       | 6/5     | 4 | 1 | Cytoplasm, Nucleus, Melanosome                     | Cytoskeleton. Actin capping.                                                                                                 |
| 78  | Mannose-6-phosphate receptor-binding protein 1                                 | O60664  | 0       | 2/2     | 2/2     | 2/2     | 3/3     | 0       | 0       | 2/2     | 4 | 1 | Endosome, Golgi                                    | Transport M6PR from endosomes to the TGN.                                                                                    |
| 79  | Platelet glycoprotein 4 (CD36)                                                 | P16671  | [1]/[1] | 0       | 2/2     | [1]/[1] | 3/3     | [1]/[1] | 0       | 0       | 4 | 1 | Membrane, PM, Golgi                                | LDL receptor activity. Scavenger receptor. Phagocytic receptor (Baranova et al. 2008)                                        |
| 80  | Protein disulfide-isomerase A4                                                 | P13667  | 0       | [1]/[1] | 3/3     | 2/2     | 4/4     | 0       | [1]/[1] | 0       | 4 | 1 | ER                                                 | Disulfide bond rearrangement.                                                                                                |
| 81  | Ras-related protein Rab-1A                                                     | P62820  | 2/2     | 0       | 2/2     | 4/4     | 4/4     | 0       | 2/2     | 0       | 4 | 1 | ER, Golgi                                          | ER to Golgi traffic.                                                                                                         |
| 82  | Sodium/potassium-transporting ATPase subunit alpha-1                           | P05023  | 0       | 5/5     | 6/6     | 9/9     | 7/7     | 0       | 2/2     | 0       | 4 | 1 | Membrane                                           | Ion transport. Generation of ATP.                                                                                            |
| 83  | Talin-1                                                                        | Q9Y490  | 0       | 14/14   | 3/3     | 11/11   | 18/18   | 0       | 0       | 20/20   | 4 | 1 | Cytoplasm                                          | Cytoskeleton.                                                                                                                |
| 84  | Glucosidase 2 subunit beta                                                     | P14314  | 0       | [1]/[1] | [1]/[1] | [1]/[1] | [1]/[1] | 0       | 0       | [1]/[1] | 4 | 1 | ER, Golgi                                          | N-linked oligosaccharide processing.                                                                                         |
| 85  | Phosphate carrier protein, mitochondrial                                       | Q00325  | 0       | [1]/[1] | [1]/[1] | [1]/[1] | [1]/[1] | 0       | [1]/[1] | 0       | 4 | 1 | Mitochondrion                                      | Transport of phosphate groups.                                                                                               |
| 86  | CD44 antigen                                                                   | P16070  | 0       | [1]/[1] | [1]/[1] | [1]/[1] | 2/2     | 0       | 0       | 0       | 4 | 0 | PM                                                 | Hyaluronic acid (HA) receptor.                                                                                               |
| 87  | Erlin-2 (SPFH domain containing protein 2)                                     | O94905  | 3/3     | 0       | 5/5     | [1]/[1] | 3/3     | 0       | 0       | 0       | 4 | 0 | ER membrane, PM                                    | Lipid raft associated.                                                                                                       |
| 88  | Golgi apparatus protein 1 (E-selectin ligand 1)                                | Q92896  | 0       | 2/2     | 4/4     | 24/24   | 11/11   | 0       | 0       | 0       | 4 | 0 | Golgi, PM                                          | Binds fibroblast growth factor and E-selectin.                                                                               |
| 89  | Intercellular adhesion molecule 1                                              | P05362  | 0       | [1]/[1] | 2/2     | 3/3     | [1]/[1] | 0       | 0       | 0       | 4 | 0 | PM                                                 | Ligand for LFA-1protein.                                                                                                     |
| 90  | Protein FAM3C                                                                  | Q92520  | 0       | 4/4     | 2/2     | 4/4     | 4/4     | 0       | 0       | 0       | 4 | 0 | Putative secreted protein                          | Unknown. Member of cytokine-like gene family. May be involved in cell differentiation and proliferation during embryogenesis |
| 91  | Ras GTPase-activating-like protein IQGAP1                                      | P46940  | 0       | 3/3     | 5/4     | 9/9     | 14/14   | 0       | 0       | 0       | 4 | 0 | Membrane                                           | Integrates Ca2+/calmodulin and Cdc42 signaling.                                                                              |
| 92  | Ras-related protein Rab-6A                                                     | P20340  | 0       | 2/2     | 2/2     | 7/7     | 6/6     | 0       | 0       | 0       | 4 | 0 | Golgi                                              | Golgi to ER traffic.                                                                                                         |
| 93  | Stress-induced-phosphoprotein 1                                                | P31948  | 0       | 6/6     | 2/2     | 5/5     | 8/8     | 0       | 0       | 0       | 4 | 0 | Cytoplasm, Nucleus                                 | Mediate the association of chaperones HSC70 and HSC90.                                                                       |
| 94  | Transmembrane emp24 domain-containing protein 9                                | Q9BVK6  | 0       | [1]/[1] | [1]/[1] | 2/2     | [1]/[1] | 0       | 0       | 0       | 4 | 0 | ER membrane                                        | Unkown.                                                                                                                      |
| 95  | Tubulin alpha-1C chain                                                         | Q9BQE3  | 0       | 7/7     | 3/3     | 7/7     | 2/2     | 0       | 0       | 0       | 4 | 0 | Cytoplasm                                          | Cytoskeleton.                                                                                                                |
| 96  | Tubulin beta chain                                                             | P07437  | 0       | 13/12   | 12/11   | 12/12   | 4/4     | 0       | 0       | 0       | 4 | 0 | Cytoplasm                                          | Cytoskeleton.                                                                                                                |
| 97  | Tumor protein D54                                                              | O43399  | 0       | [1]/[1] | 2/2     | 3/3     | [1]/[1] | 0       | 0       | 0       | 4 | 0 | Unknown                                            | Unknown.                                                                                                                     |
| 98  | Very long-chain specific acyl-CoA dehydrogenase, mitochondrial                 | P49748  | 0       | 4/4     | 4/4     | [1]/[1] | 2/2     | 0       | 0       | 0       | 4 | 0 | Mitochondrion                                      | Fatty acid beta-oxidation system.                                                                                            |
| 99  | Dolichyl-diphosphooligosaccharide-protein glycosyltransferase 48 kDa subunit   | P39656  | 0       | 0       | 2/2     | 4/4     | 2/2     | 2/2     | [1]/[1] | [1]/[1] | 3 | 3 | ER membrane                                        | Glycosylation.                                                                                                               |
| 100 | Peptidyl-prolyl cis-trans isomerase B (Cyclophilin B)                          | P23284  | 3/3     | 0       | 3/3     | 3/3     | 0       | 6/6     | 2/2     | 4/4     | 3 | 3 | ER, Melanosome, Synaptic vesicle, Secreted protein | Protein folding. Chaperone.                                                                                                  |
| 101 | Vacuolar proton pump subunit E 1                                               | P36543  | 4/4     | 0       | 5/5     | 4/4     | 0       | 3/3     | 5/5     | 2/2     | 3 | 3 | Intracellular compartments, Endosome-Lysosome      | Compartment acidification.                                                                                                   |
| 102 | Ras-related protein Rap-1b*                                                    | P61224* | [1]/[1] | 0       | [1]/[1] | [1]/[1] | 0       | [1]/[1] | [1]/[1] | [1]/[1] | 3 | 3 | Late endosome, Lysosome, Phagosome, Exosome        | Regulation of integrin signaling.                                                                                            |
| 103 | Apolipoprotein E                                                               | P02649  | 2/2     | 0       | 0       | 5/5     | 7/7     | [1]/[1] | 0       | [1]/[1] | 3 | 2 | Secreted protein                                   | Lipoprotein internalization/catabolism.                                                                                      |
| 104 | ATP synthase subunit gamma, mitochondrial                                      | P36542  | [1]/[1] | 0       | 2/2     | [1]/[1] | 0       | [1]/[1] | [1]/[1] | 0       | 3 | 2 | Mitochondrion                                      | ATP synthesis. Ion transport.                                                                                                |
| 105 | Beta-hexosaminidase subunit beta                                               | P07686  | 2/2     | 0       | 0       | 2/2     | 2/2     | 2/2     | 0       | [1]/[1] | 3 | 2 | Lysosome                                           | Degradation of terminal N-acetyl hexosamines.                                                                                |
| 106 | Cathepsin S                                                                    | P25774  | 0       | 0       | [1]/[1] | 2/2     | [1]/[1] | [1]/[1] | 2/2     | 0       | 3 | 2 | Lysosome                                           | Key protease for the removal of invariant chain from MHC class II molecules.                                                 |
| 107 | Coiled-coil-helix-coiled-coil-helix domain-containing protein 3, mitochondrial | Q9NX63  | [1]/[1] | 0       | 2/2     | 0       | [1]/[1] | 2/2     | [1]/[1] | 0       | 3 | 2 | Mitochondrion (by similarity)                      | Unkown.                                                                                                                      |
| 108 | Cytochrome c oxidase subunit 2                                                 | P00403  | [1]/[1] | 2/2     | [1]/[1] | 0       | 0       | [1]/[1] | [1]/[1] | 0       | 3 | 2 | Mitochondrion                                      | Respiratory Chain. Electron transport.                                                                                       |
| 109 | Dolichyl-diphosphooligosaccharide-protein glycosyltransferase subunit 1        | P04843  | 0       | 0       | 2/2     | 2/2     | 8/8     | 4/4     | 0       | 2/2     | 3 | 2 | ER membrane, Melanosome                            | Glycosylation.                                                                                                               |
| 110 | Endoplasmic reticulum protein ERp29                                            | P30040  | 0       | 0       | [1]/[1] | 2/2     | 2/2     | 0       | [1]/[1] | 4/4     | 3 | 2 | ER lumen, Melanosome                               | Protein synthesis and folding.                                                                                               |
| 111 | F-actin-capping protein subunit beta                                           | P47756  | 0       | 0       | [1]/[1] | [1]/[1] | [1]/[1] | 0       | [1]/[1] | 2/2     | 3 | 2 | Cytoplasm                                          | Cytoskeleton.                                                                                                                |
| 112 | Galectin-9B*                                                                   | Q3B8N2* | 0       | 0       | [1]/[1] | [1]/[1] | [1]/[1] | 2/2     | [1]/[1] | 0       | 3 | 2 | Unknown                                            | Binds galactosides.                                                                                                          |
| 113 | L-lactate dehydrogenase A chain                                                | P00338  | 0       | 0       | 3/3     | 5/5     | 5/5     | 0       | [1]/[1] | 5/5     | 3 | 2 | Cytoplasm                                          | Anaerobic glycolysis.                                                                                                        |
| 114 | Neutral alpha-glucosidase AB                                                   | Q14697  | 0       | 5/5     | 3/3     | [1]/[1] | 0       | 0       | 2/2     | 2/2     | 3 | 2 | ER, Golgi, Melanosome                              | N-linked oligosaccharide processing.                                                                                         |
| 115 | Peroxisomal multifunctional enzyme type 2                                      | P51659  | 0       | 0       | 3/3     | 3/3     | 2/2     | 2/2     | 2/2     | 0       | 3 | 2 | Peroxisome                                         | Fatty acid beta-oxidation cycle.                                                                                             |

|     |                                                   |        |         |         |         |         |         |         |         |         |   |   |                                                                                                                                                                                     |                                                                                                                                               |
|-----|---------------------------------------------------|--------|---------|---------|---------|---------|---------|---------|---------|---------|---|---|-------------------------------------------------------------------------------------------------------------------------------------------------------------------------------------|-----------------------------------------------------------------------------------------------------------------------------------------------|
| 116 | Ras-related protein Rab-13                        | P51153 | 0       | 0       | 3/3     | 2/2     | 2/2     | 2/2     | 3/3     | 0       | 3 | 2 | Cell junction                                                                                                                                                                       | Polarized transport of vesicles.                                                                                                              |
| 117 | Serpin H1                                         | P50454 | 0       | 0       | 2/2     | 2/2     | [1]/[1] | 0       | [1]/[1] | 2/2     | 3 | 2 | ER lumen                                                                                                                                                                            | Binds collagen.                                                                                                                               |
| 118 | Synaptogyrin-2                                    | O43760 | 0       | 0       | [1]/[1] | 2/2     | 2/2     | [1]/[1] | [1]/[1] | 0       | 3 | 2 | Membrane                                                                                                                                                                            | Unknown.                                                                                                                                      |
| 119 | Syntaxin-12                                       | Q86Y82 | 2/2     | 0       | [1]/[1] | 0       | 3/3     | 2/2     | [1]/[1] | 0       | 3 | 2 | Membrane                                                                                                                                                                            | Regulate protein transport between late endosomes and the TGN.                                                                                |
| 120 | Tripeptidyl-peptidase 1                           | O14773 | 3/3     | 2/2     | 0       | 2/2     | 0       | 4/4     | 4/4     | 0       | 3 | 2 | Lysosome                                                                                                                                                                            | Serine protease.                                                                                                                              |
| 121 | 14-3-3 protein beta/alpha                         | P31946 | 0       | 0       | 3/3     | 5/5     | 5/5     | 0       | 0       | 6/6     | 3 | 1 | Cytoplasm, Melanosome                                                                                                                                                               | Regulates signal transduction pathways.                                                                                                       |
| 122 | 14-3-3 protein gamma                              | P61981 | 0       | 0       | 4/4     | 6/6     | 5/5     | 0       | 0       | 6/6     | 3 | 1 | Cytoplasm                                                                                                                                                                           | Regulates signal transduction pathways.                                                                                                       |
| 123 | 14-3-3 protein zeta/delta                         | P63104 | 0       | 0       | 4/3     | 5/5     | 5/5     | 0       | 0       | 7/6     | 3 | 1 | Cytoplasm, Melanosome                                                                                                                                                               | Regulates signal transduction pathways.                                                                                                       |
| 124 | 6-phosphogluconate dehydrogenase, decarboxylating | P52209 | 0       | 0       | 2/2     | 3/3     | 6/6     | 0       | 0       | 4/4     | 3 | 1 | Cytoplasm                                                                                                                                                                           | Metabolism. Pentose phosphate pathway. May form supramolecular complex that can associate with cytoskeleton (Kindzelskii et al., 2004).       |
| 125 | 60S ribosomal protein L7                          | P18124 | 0       | 0       | 2/2     | 2/2     | [1]/[1] | 0       | 0       | [1]/[1] | 3 | 1 | Cytoplasm                                                                                                                                                                           | Protein synthesis.                                                                                                                            |
| 126 | Actin-related protein 2/3 complex subunit 5       | O15511 | 0       | 0       | 2/2     | 2/2     | [1]/[1] | 0       | 0       | [1]/[1] | 3 | 1 | Cytoplasm                                                                                                                                                                           | F-actin assembly.                                                                                                                             |
| 127 | Annexin A4                                        | P09525 | 0       | 0       | 2/2     | 2/2     | 3/3     | 0       | 0       | 5/5     | 3 | 1 | Cytoplasm, Cytoskeleton                                                                                                                                                             | Calcium/phospholipid-binding protein which promotes membrane fusion and is involved in exocytosis.                                            |
| 128 | Apolipoprotein D                                  | P05090 | 2/2     | 0       | [1]/[1] | 2/2     | 0       | 0       | 4/4     | 0       | 3 | 1 | Secreted protein                                                                                                                                                                    | Lipid binding and transport.                                                                                                                  |
| 129 | ATP synthase subunit delta, mitochondrial         | P30049 | [1]/[1] | 0       | 2/2     | [1]/[1] | 0       | 0       | [1]/[1] | 0       | 3 | 1 | Mitochondrion                                                                                                                                                                       | ATP synthesis. Ion transport.                                                                                                                 |
| 130 | ATP synthase subunit O, mitochondrial             | P48047 | 2/2     | 0       | 2/2     | 0       | 5/5     | [1]/[1] | 0       | 0       | 3 | 1 | Mitochondrion                                                                                                                                                                       | ATP synthesis. Ion transport.                                                                                                                 |
| 131 | Calreticulin                                      | P27797 | 0       | 3/3     | 0       | 3/3     | 2/2     | 0       | 0       | [1]/[1] | 3 | 1 | ER lumen. Cytosol. Secreted. Also found on cell surface (T cells), cytosol and extracellular matrix. Associated with the lytic and folding granules in the cytolytic T-lymphocytes. | Calcium-binding chaperone protein. Involved in protein synthesis.                                                                             |
| 132 | Carbonic anhydrase 2                              | P00918 | 0       | [1]/[1] | 0       | [1]/[1] | [1]/[1] | 0       | 0       | 2/2     | 3 | 1 | Cytoplasm                                                                                                                                                                           | Hydration of carbon dioxide.                                                                                                                  |
| 133 | Carnitine O-palmitoyltransferase 2, mitochondrial | P23786 | 0       | [1]/[1] | 3/3     | 0       | 2/2     | [1]/[1] | 0       | 0       | 3 | 1 | Mitochondrion                                                                                                                                                                       | Fatty acid beta-oxidation cycle.                                                                                                              |
| 134 | Cathepsin B                                       | P07858 | 2/2     | 0       | 0       | 4/3     | [1]/[1] | 2/2     | 0       | 0       | 3 | 1 | Lysosome                                                                                                                                                                            | Protein degradation. Thiol protease.                                                                                                          |
| 135 | Chloride intracellular channel protein 1          | O00299 | 0       | 0       | 2/[1]   | 4/4     | 7/6     | 0       | 0       | 3/3     | 3 | 1 | Nucleus, Cytoplasm, PM, Cytosol                                                                                                                                                     | Chloride ion channel. Can insert into membranes from aqueous phase.                                                                           |
| 136 | Cytochrome b-c1 complex subunit 2, mitochondrial  | P22695 | 3/2     | 0       | [1]/[1] | 0       | [1]/[1] | 0       | [1]/[1] | 0       | 3 | 1 | Mitochondrion                                                                                                                                                                       | Respiratory Chain. Electron transport.                                                                                                        |
| 137 | Elongation factor 2                               | P13639 | 0       | 8/8     | 0       | 6/6     | 4/4     | 0       | 0       | 3/3     | 3 | 1 | Cytoplasm                                                                                                                                                                           | Translation elongation factor activity. GTPase.                                                                                               |
| 138 | Elongation factor Tu, mitochondrial               | P49411 | 5/5     | 0       | [1]/[1] | 0       | 4/4     | 2/2     | 0       | 0       | 3 | 1 | Mitochondrion                                                                                                                                                                       | Translation elongation factor activity. GTPase.                                                                                               |
| 139 | Monocarboxylate transporter 4                     | O15427 | 0       | 0       | [1]/[1] | [1]/[1] | 3/3     | 0       | [1]/[1] | 0       | 3 | 1 | PM, Membrane                                                                                                                                                                        | Monocarboxylic acid transport.                                                                                                                |
| 140 | Myosin light polypeptide 6                        | P60660 | 0       | 0       | 3/3     | 5/4     | 3/3     | 0       | 0       | 2/2     | 3 | 1 | Cytoplasm                                                                                                                                                                           | Cytoskeleton.                                                                                                                                 |
| 141 | Phosphoglycerate kinase 1                         | P00558 | 0       | 0       | [1]/[1] | 4/4     | 8/8     | 0       | 0       | 3/3     | 3 | 1 | Cytoplasm                                                                                                                                                                           | Carbohydrate degradation. Glycolysis.                                                                                                         |
| 142 | Prohibitin-2                                      | Q99623 | 4/4     | 0       | 2/2     | 0       | [1]/[1] | 0       | 3/3     | 0       | 3 | 1 | Mitochondrion, Cytoplasm, Nucleus                                                                                                                                                   | Transcriptional repression.                                                                                                                   |
| 143 | Pyruvate kinase isozymes M1/M2                    | P14618 | 0       | 9/9     | 0       | 8/8     | 10/10   | 0       | 0       | 7/7     | 3 | 1 | Cytoplasm                                                                                                                                                                           | Carbohydrate degradation. Glycolysis.                                                                                                         |
| 144 | Ras-related protein Rab-1B                        | Q9H0U4 | 0       | 0       | 2/2     | 3/3     | 4/4     | 0       | 0       | 2/2     | 3 | 1 | ER, Golgi, Cytoplasm                                                                                                                                                                | Regulates vesicular transport between the ER and successive Golgi compartments.                                                               |
| 145 | Ras-related protein Rab-5A                        | P20339 | 0       | 0       | 2/2     | 4/3     | 2/2     | 0       | 3/3     | 0       | 3 | 1 | Endosome, Melanosome                                                                                                                                                                | Fusion of PM and early endosomes.                                                                                                             |
| 146 | Ras-related protein Rab-8B                        | Q92930 | 0       | 0       | 2/2     | 2/2     | 3/3     | 0       | 2/2     | 0       | 3 | 1 | Membrane                                                                                                                                                                            | Vesicular trafficking.                                                                                                                        |
| 147 | Serine hydroxymethyltransferase, mitochondrial    | P34897 | 5/5     | 2/2     | 0       | 0       | [1]/[1] | 3/3     | 0       | 0       | 3 | 1 | Mitochondrion                                                                                                                                                                       | Interconversion of serine and glycine.                                                                                                        |
| 148 | Sideroflexin-1                                    | Q9H9B4 | 2/2     | 0       | [1]/[1] | 0       | 3/3     | [1]/[1] | 0       | 0       | 3 | 1 | Mitochondrion                                                                                                                                                                       | May be involved in transport of a component required for iron utilization.                                                                    |
| 149 | Superoxide dismutase [Mn], mitochondrial          | P04179 | 0       | 0       | 3/3     | [1]/[1] | 6/6     | 0       | 2/2     | 0       | 3 | 1 | Mitochondrion                                                                                                                                                                       | Detoxification of superoxide radicals.                                                                                                        |
| 150 | T-complex protein 1 subunit beta                  | P78371 | 0       | 2/2     | 0       | 2/2     | 2/2     | 0       | 0       | 6/6     | 3 | 1 | Cytoplasm                                                                                                                                                                           | Molecular chaperone. Assist the folding of proteins upon ATP hydrolysis. Known to play a role, in vitro, in the folding of actin and tubulin. |
| 151 | T-complex protein 1 subunit epsilon               | P48643 | 0       | 4/4     | 2/2     | 0       | 3/3     | 0       | 0       | 6/6     | 3 | 1 | Cytoplasm                                                                                                                                                                           | Molecular chaperone. Assist the folding of proteins upon ATP hydrolysis. Known to play a role, in vitro, in the folding of actin and tubulin. |
| 152 | T-complex protein 1 subunit theta                 | P50990 | 0       | 9/9     | 0       | 11/11   | 3/3     | 0       | 0       | 11/11   | 3 | 1 | Cytoplasm                                                                                                                                                                           | Molecular chaperone; assist the folding of proteins upon ATP hydrolysis. Known to play a role, in vitro, in the folding of actin and tubulin. |

|     |                                                                   |         |         |         |         |         |         |         |         |         |   |   |                                               |                                                                                                                                                                                                                               |
|-----|-------------------------------------------------------------------|---------|---------|---------|---------|---------|---------|---------|---------|---------|---|---|-----------------------------------------------|-------------------------------------------------------------------------------------------------------------------------------------------------------------------------------------------------------------------------------|
| 153 | Transgelin-2                                                      | P37802  | 0       | 0       | 3/3     | 2/2     | 4/4     | 0       | 0       | 2/2     | 3 | 1 | Cytoplasm                                     | Cytoskeleton. Probable actin cross-linking.                                                                                                                                                                                   |
| 154 | Trifunctional enzyme subunit beta, mitochondrial                  | P55084  | 3/3     | 0       | 3/3     | 0       | 5/5     | 0       | [1]/[1] | 0       | 3 | 1 | Mitochondrion                                 | Fatty acid beta-oxidation cycle.                                                                                                                                                                                              |
| 155 | UPF0550 protein C7orf28                                           | O95766  | 4/4     | [1]/[1] | 0       | [1]/[1] | 0       | 2/2     | 0       | 0       | 3 | 1 | Unknown                                       | Unknown.                                                                                                                                                                                                                      |
| 156 | ATP synthase subunit g, mitochondrial                             | O75964  | [1]/[1] | 0       | [1]/[1] | [1]/[1] | 0       | [1]/[1] | 0       | 0       | 3 | 1 | Mitochondrion                                 | ATP synthesis. Ion transport.                                                                                                                                                                                                 |
| 157 | Catalase                                                          | P04040  | 0       | 0       | [1]/[1] | [1]/[1] | [1]/[1] | 0       | 0       | [1]/[1] | 3 | 1 | Peroxisome                                    | Oxido-reductase.                                                                                                                                                                                                              |
| 158 | Retinoid-inducible serine carboxypeptidase                        | Q9HB40  | [1]/[1] | 0       | 0       | [1]/[1] | [1]/[1] | [1]/[1] | 0       | 0       | 3 | 1 | Secreted protein, Lysosome                    | Carboxypeptidase. Colocalizes with LAMP2 (Lee, et al. 2006).                                                                                                                                                                  |
| 159 | Vacuolar ATP synthase 16 kDa proteolipid subunit                  | P27449  | [1]/[1] | [1]/[1] | 0       | 0       | [1]/[1] | [1]/[1] | 0       | 0       | 3 | 1 | Vacuole membrane                              | Acidification of intracellular compartments.                                                                                                                                                                                  |
| 160 | ADP/ATP translocase 2                                             | P05141  | 4/4     | 3/3     | [1]/[1] | 0       | 0       | 0       | 0       | 0       | 3 | 0 | Mitochondrial Membrane, PM                    | ATP/ADP translocation.                                                                                                                                                                                                        |
| 161 | Alpha-mannosidase 2                                               | Q16706  | 0       | 2/2     | 0       | 6/6     | 12/12   | 0       | 0       | 0       | 3 | 0 | Golgi                                         | N-glycosylation.                                                                                                                                                                                                              |
| 162 | Band 4.1-like protein 3                                           | Q9Y2J2  | 0       | 0       | [1]/[1] | [1]/[1] | 2/2     | 0       | 0       | 0       | 3 | 0 | Cytoplasm                                     | Links membrane to cytoskeleton.                                                                                                                                                                                               |
| 163 | Charged multivesicular body protein 4b                            | Q9H444  | 0       | 0       | 5/3     | 2/2     | [1]/[1] | 0       | 0       | 0       | 3 | 0 | Cytoplasm; Endosome                           | MVB formation & sorting of endosomal cargo proteins into MVBs.                                                                                                                                                                |
| 164 | Glutamate dehydrogenase 1, mitochondrial                          | P00367  | 4/3     | 2/2     | 2/2     | 0       | 0       | 0       | 0       | 0       | 3 | 0 | Mitochondrion                                 | Oxidative deamination of glutamate to alpha-ketoglutarate.                                                                                                                                                                    |
| 165 | Guanine nucleotide-binding protein G(I)/G(S)/G(T) subunit beta-1  | P62873  | 3/3     | 0       | 0       | 2/2     | 2/2     | 0       | 0       | 0       | 3 | 0 | Membrane                                      | Transmembrane signaling.                                                                                                                                                                                                      |
| 166 | Integrin alpha-5                                                  | P08648  | [1]/[1] | 3/3     | [1]/[1] | 0       | 0       | 0       | 0       | 0       | 3 | 0 | PM                                            | Receptor for fibronectin and fibrinogen, present in endocytic pathway (Shakibaei et al., 1993).                                                                                                                               |
| 167 | Nucleobindin-1                                                    | Q02818  | 0       | 3/3     | 0       | 6/6     | 8/8     | 0       | 0       | 0       | 3 | 0 | Golgi, Cytoplasm, Membrane                    | Calcium homeostasis.                                                                                                                                                                                                          |
| 168 | Platelet endothelial cell adhesion molecule                       | P16284  | 0       | 0       | 5/5     | 4/4     | 5/5     | 0       | 0       | 0       | 3 | 0 | PM                                            | Cell adhesion. Signal transduction.                                                                                                                                                                                           |
| 169 | Ras-related protein Rab-14                                        | P61106  | 0       | [1]/[1] | [1]/[1] | 2/2     | 0       | 0       | 0       | 0       | 3 | 0 | Membrane                                      | Vesicular trafficking.                                                                                                                                                                                                        |
| 170 | Septin-7                                                          | Q16181  | 0       | 0       | 2/2     | 2/2     | 4/4     | 0       | 0       | 0       | 3 | 0 | Cytoplasm                                     | Associates with actin stress fibers. GTPase. Cytokinesis and exocytosis.                                                                                                                                                      |
| 171 | Synaptic vesicle membrane protein VAT-1 homolog                   | Q99536  | 2/2     | 0       | 0       | [1]/[1] | 2/2     | 0       | 0       | 0       | 3 | 0 | Membrane                                      | Unknown. Has ATPase activity and sequence homology to alcohol dehydrogenase and ξ-crystallin.                                                                                                                                 |
| 172 | Vacuolar proton pump subunit C 1                                  | P21283  | 6/6     | 0       | 0       | [1]/[1] | [1]/[1] | 0       | 0       | 0       | 3 | 0 | Intracellular compartments, Endosome-Lysosome | Compartment acidification.                                                                                                                                                                                                    |
| 173 | Vesicle-trafficking protein SEC22b                                | O75396  | 0       | 0       | 2/2     | 2/2     | 3/3     | 0       | 0       | 0       | 3 | 0 | ER-Golgi intermediate compartment, Melanosome | ER to Golgi targeting and fusion.                                                                                                                                                                                             |
| 174 | 60S ribosomal protein L35                                         | P42766  | 0       | [1]/[1] | 0       | [1]/[1] | [1]/[1] | 0       | 0       | 0       | 3 | 0 | Cytoplasm                                     | Protein synthesis.                                                                                                                                                                                                            |
| 175 | 60S ribosomal protein L8                                          | P62917  | 0       | 0       | [1]/[1] | [1]/[1] | [1]/[1] | 0       | 0       | 0       | 3 | 0 | Cytoplasm                                     | Protein synthesis.                                                                                                                                                                                                            |
| 176 | Macrophage migration inhibitory factor                            | P14174  | 0       | [1]/[1] | [1]/[1] | [1]/[1] | 0       | 0       | 0       | 0       | 3 | 0 | Secreted protein                              | Pro-inflammatory immune modulator.                                                                                                                                                                                            |
| 177 | Ras-related protein Ral-B*                                        | P11234* | [1]/[1] | 0       | 0       | [1]/[1] | [1]/[1] | 0       | 0       | 0       | 3 | 0 | Membrane                                      | Signal transduction. Regulation of exocytosis. Activation of IκappaB kinase TBK1.                                                                                                                                             |
| 178 | Translocon-associated protein subunit alpha                       | P43307  | [1]/[1] | 0       | [1]/[1] | 0       | [1]/[1] | 0       | 0       | 0       | 3 | 0 | ER                                            | Bind calcium to the ER membrane. Regulate retention of ER resident proteins.                                                                                                                                                  |
| 179 | 60S ribosomal protein L22                                         | P35268  | 0       | 0       | [1]/[1] | [1]/[1] | 0       | [1]/[1] | [1]/[1] | [1]/[1] | 2 | 3 | Cytoplasm                                     | Protein synthesis.                                                                                                                                                                                                            |
| 180 | B-cell receptor-associated protein 31                             | P51572  | 0       | 0       | 0       | 2/2     | 2/2     | 3/3     | 2/2     | 0       | 2 | 2 | ER, Golgi                                     | Putative cargo receptor for ER to Golgi anterograde transport of membrane proteins. CASP8-mediated apoptosis. Interacts with VAMP3, VAMP1 and membrane IgD immunoglobulins. May interact with ACTG1 and non-muscle myosin II. |
| 181 | Flotillin-2                                                       | Q14254  | 3/3     | 0       | 4/4     | 0       | 0       | 3/3     | 7/7     | 0       | 2 | 2 | PM, Phagosomal membrane                       | Lipid rafts. Clathrin independent endocytosis. Formation of caveolae or caveolae-like vesicles.                                                                                                                               |
| 182 | Guanine nucleotide-binding protein G(i), alpha-2 subunit          | P04899  | 2/2     | 0       | 0       | 0       | 8/7     | 3/3     | 0       | 2/2     | 2 | 2 | Membrane                                      | Transmembrane signaling.                                                                                                                                                                                                      |
| 183 | Guanine nucleotide-binding protein G(I)/G(S)/G(O) subunit gamma-5 | P63218  | [1]/[1] | 0       | 0       | 2/2     | 0       | 2/2     | 2/2     | 0       | 2 | 2 | Membrane                                      | Transmembrane signaling.                                                                                                                                                                                                      |
| 184 | Guanine nucleotide-binding protein G(k) subunit alpha             | P08754  | 0       | 0       | 5/5     | 0       | 5/4     | 3/3     | 0       | 2/2     | 2 | 2 | Membrane                                      | Transmembrane signaling.                                                                                                                                                                                                      |
| 185 | Heat shock 70 kDa protein 1                                       | P08107  | 0       | 0       | 0       | 5/5     | 5/5     | 0       | 3/3     | 6/6     | 2 | 2 | Cytoplasm                                     | Chaperone involved in protein stabilizing and folding.                                                                                                                                                                        |
| 186 | Phospholipase D3                                                  | Q8IV08  | 4/4     | 0       | 0       | 0       | 2/2     | 4/4     | 2/2     | 0       | 2 | 2 | ER membrane                                   | Lipid degradation.                                                                                                                                                                                                            |
| 187 | Ras-related C3 botulinum toxin substrate 1                        | P63000  | 2/2     | 0       | 2/2     | 0       | 0       | 5/5     | 3/3     | 0       | 2 | 2 | Membrane, Melanosome                          | Cellular response regulator.                                                                                                                                                                                                  |
| 188 | Sugar phosphate exchanger 2                                       | Q8TED4  | 0       | 0       | [1]/[1] | [1]/[1] | 0       | [1]/[1] | 2/2     | 0       | 2 | 2 | Membrane                                      | Sugar transport.                                                                                                                                                                                                              |
| 189 | Trifunctional enzyme subunit alpha, mitochondrial                 | P40939  | 6/6     | 0       | 0       | 0       | 3/3     | [1]/[1] | [1]/[1] | 0       | 2 | 2 | Mitochondrion                                 | Fatty acid beta-oxidation cycle.                                                                                                                                                                                              |
| 190 | V-type proton ATPase subunit G 1                                  | O75348  | 2/2     | 0       | 0       | 4/4     | 0       | 3/3     | 3/3     | 0       | 2 | 2 | Membrane                                      | Compartment acidification.                                                                                                                                                                                                    |

|     |                                                                |         |         |         |         |         |         |         |         |         |   |   |                                      |                                                                                                                                               |
|-----|----------------------------------------------------------------|---------|---------|---------|---------|---------|---------|---------|---------|---------|---|---|--------------------------------------|-----------------------------------------------------------------------------------------------------------------------------------------------|
| 191 | V-type proton ATPase 116 kDa subunit a isoform 3               | Q13488  | 6/6     | 0       | 0       | 4/4     | 0       | 4/4     | 4/4     | 0       | 2 | 2 | Membrane                             | Compartment acidification.                                                                                                                    |
| 192 | Vesicle transport through interaction with t-SNAREs homolog 1B | Q9JEU0  | [1]/[1] | 0       | 0       | [1]/[1] | 0       | [1]/[1] | [1]/[1] | 0       | 2 | 2 | Cytoplasmic vesicles                 | Late endosome fusion. Forms SNARE complex with VAMP8, STX7, and STX8.                                                                         |
| 193 | 14-3-3 protein theta                                           | P27348  | 0       | 0       | 0       | 3/3     | 3/3     | 0       | 0       | 4/4     | 2 | 1 | Cytoplasm                            | Regulates signal transduction pathways.                                                                                                       |
| 194 | 40S ribosomal protein S19                                      | P39019  | 0       | 0       | 0       | [1]/[1] | 3/3     | 0       | 0       | [1]/[1] | 2 | 1 | Cytoplasm                            | Protein synthesis.                                                                                                                            |
| 195 | 40S ribosomal protein S25                                      | P62851  | 0       | 0       | [1]/[1] | 3/3     | 0       | 0       | 0       | 3/3     | 2 | 1 | Cytoplasm                            | Protein synthesis.                                                                                                                            |
| 196 | 40S ribosomal protein S3                                       | P23396  | 0       | 0       | 0       | 2/2     | 3/3     | 0       | 0       | 2/2     | 2 | 1 | Cytoplasm                            | Protein synthesis.                                                                                                                            |
| 197 | 40S ribosomal protein S4, X isoform                            | P62701  | 0       | 0       | 0       | 2/2     | [1]/[1] | 0       | 0       | 3/3     | 2 | 1 | Cytoplasm                            | Protein synthesis.                                                                                                                            |
| 198 | 60S acidic ribosomal protein P0                                | P05388  | [1]/[1] | 0       | 0       | 0       | 3/3     | 0       | 0       | 2/2     | 2 | 1 | Cytoplasm                            | Protein synthesis.                                                                                                                            |
| 199 | 60S ribosomal protein L13                                      | P26373  | 0       | 0       | [1]/[1] | [1]/[1] | 0       | 0       | 0       | 2/2     | 2 | 1 | Cytoplasm                            | Protein synthesis.                                                                                                                            |
| 200 | Actin-related protein 2/3 complex subunit 4                    | P59998  | 0       | 2/2     | [1]/[1] | 0       | 0       | 0       | 0       | [1]/[1] | 2 | 1 | Cytoplasm                            | Cytoskeleton. F-actin assembly.                                                                                                               |
| 201 | Annexin A1                                                     | P04083  | 0       | 0       | 0       | 3/3     | 7/7     | 0       | 0       | 4/4     | 2 | 1 | Membrane, Cytoplasm                  | Calcium/phospholipid-binding protein which promotes membrane fusion and is involved in exocytosis.                                            |
| 202 | Cytochrome b-c1 complex subunit 1, mitochondrial               | P31930  | 4/3     | 0       | 2/2     | 0       | 0       | 0       | [1]/[1] | 0       | 2 | 1 | Mitochondrion                        | Respiratory Chain. Electron transport.                                                                                                        |
| 203 | F-actin-capping protein subunit alpha-1                        | P52907  | 0       | 0       | 0       | 3/3     | 2/2     | 0       | 0       | 2/2     | 2 | 1 | Cytoplasm                            | Cytoskeleton. Actin capping.                                                                                                                  |
| 204 | GTP-binding nuclear protein Ran                                | P62826  | 0       | 2/2     | 0       | [1]/[1] | 0       | 0       | 0       | [1]/[1] | 2 | 1 | Nucleus, Cytoplasm, Melanosome       | GTPase. Regulates protein transport into nucleus.                                                                                             |
| 205 | Importin subunit beta-1                                        | Q14974  | 0       | [1]/[1] | 0       | 4/4     | 0       | 0       | 0       | 3/3     | 2 | 1 | Nucleus, Cytoplasm                   | Nuclear protein import.                                                                                                                       |
| 206 | Isocitrate dehydrogenase [NADP], mitochondrial                 | P48735  | 7/7     | 0       | 2/2     | 0       | 0       | 0       | 3/3     | 0       | 2 | 1 | Mitochondrion                        | Metabolism and energy production.                                                                                                             |
| 207 | L-lactate dehydrogenase B chain                                | P07195  | 0       | 0       | 0       | 6/6     | 5/5     | 0       | 0       | 6/6     | 2 | 1 | Cytoplasm                            | Anaerobic glycolysis.                                                                                                                         |
| 208 | LIM and SH3 domain protein 1                                   | Q14847  | 0       | 0       | 0       | 3/3     | 2/2     | 0       | 0       | 3/3     | 2 | 1 | Cytoplasm                            | Cytoskeleton. Regulation of dynamic actin-based, cytoskeletal activities.                                                                     |
| 209 | Leukocyte common antigen (CD45)                                | P08575  | 0       | 0       | 0       | 3/3     | 3/3     | 0       | 0       | [1]/[1] | 2 | 1 | PM                                   | Receptor-linked protein tyrosine phosphatase involved in signal transduction.                                                                 |
| 210 | Long-chain-fatty-acid--CoA ligase 4                            | O60488  | 0       | 0       | 5/5     | 2/2     | 0       | 0       | [1]/[1] | 0       | 2 | 1 | Mitochondrion, Microsome, Peroxisome | Lipid metabolism.                                                                                                                             |
| 211 | Malate dehydrogenase, cytoplasmic                              | P40925  | 0       | 0       | 0       | [1]/[1] | 2/2     | 0       | 0       | 2/2     | 2 | 1 | Cytoplasm                            | Metabolism.                                                                                                                                   |
| 212 | Niemann-Pick C1 protein                                        | O15118  | 0       | 2/2     | 0       | 3/3     | 0       | 0       | 2/2     | 0       | 2 | 1 | Endosome-Lysosome                    | Intracellular trafficking of cholesterol.                                                                                                     |
| 213 | Phosphoserine aminotransferase                                 | Q9Y617  | 0       | 0       | 0       | 2/2     | 2/2     | 0       | 0       | 2/2     | 2 | 1 | Cytoplasm                            | Amino acid biosynthesis.                                                                                                                      |
| 214 | Poly(rC)-binding protein 1                                     | Q15365  | 0       | 0       | 0       | 2/2     | 4/4     | 0       | 0       | 3/3     | 2 | 1 | Nucleus, Cytoplasm                   | Binds single-stranded nucleic acid.                                                                                                           |
| 215 | Programmed cell death 6-interacting protein                    | Q8WUM4  | 0       | 0       | 2/2     | 0       | [1]/[1] | 0       | 0       | 3/3     | 2 | 1 | Cytoplasm, Endosome, MVB, Melanosome | Cargo protein sorting. Membrane traffic.                                                                                                      |
| 216 | Protein DJ-1                                                   | Q99497  | 0       | [1]/[1] | 0       | [1]/[1] | 0       | 0       | 0       | 2/2     | 2 | 1 | Nucleus, Cytoplasm                   | May function as a redox-sensitive chaperone and sensor for oxidative stress.                                                                  |
| 217 | Rho GDP-dissociation inhibitor 2                               | P52566  | 0       | 0       | [1]/[1] | [1]/[1] | 0       | 0       | 0       | 2/2     | 2 | 1 | Cytoplasm                            | Regulator for Rho GTP/GDP exchange.                                                                                                           |
| 218 | Stathmin*                                                      | P16949* | 0       | [1]/[1] | 0       | 0       | [1]/[1] | 0       | 0       | 2/2     | 2 | 1 | Cytoplasm                            | Microtubule regulator.                                                                                                                        |
| 219 | T-complex protein 1 subunit eta                                | Q99832  | 0       | 0       | 0       | 3/3     | 4/4     | 0       | 0       | 6/6     | 2 | 1 | Cytoplasm                            | Molecular chaperone. Assist the folding of proteins upon ATP hydrolysis. Known to play a role, in vitro, in the folding of actin and tubulin. |
| 220 | T-complex protein 1 subunit gamma                              | P49368  | 0       | 6/6     | 0       | 5/5     | 0       | 0       | 0       | 6/6     | 2 | 1 | Cytoplasm                            | Molecular chaperone. Assist the folding of proteins upon ATP hydrolysis. Known to play a role, in vitro, in the folding of actin and tubulin. |
| 221 | T-complex protein 1 subunit zeta                               | P40227  | 0       | 4/4     | 0       | 0       | 2/2     | 0       | 0       | 7/7     | 2 | 1 | Cytoplasm                            | Molecular chaperone. Assist the folding of proteins upon ATP hydrolysis. Known to play a role, in vitro, in the folding of actin and tubulin. |
| 222 | Vesicle-associated membrane protein 8                          | Q9BV40  | 0       | 0       | [1]/[1] | 3/3     | 0       | 4/4     | 0       | 0       | 2 | 1 | Vesicle membrane                     | Homotypic fusion of early and late endosomes.                                                                                                 |
| 223 | Zyxin                                                          | Q15942  | 0       | 0       | 0       | 2/2     | [1]/[1] | 0       | 0       | 3/3     | 2 | 1 | Cytoplasm                            | Associates with actinin and sites of actin-membrane interaction.                                                                              |
| 224 | 40S ribosomal protein S21                                      | P63220  | 0       | [1]/[1] | 0       | [1]/[1] | 0       | 0       | [1]/[1] | 0       | 2 | 1 | Cytoplasm                            | Protein synthesis.                                                                                                                            |
| 225 | Eukaryotic translation initiation factor 3 subunit H           | O15372  | 0       | 0       | 0       | [1]/[1] | [1]/[1] | 0       | 0       | [1]/[1] | 2 | 1 | Cytoplasm                            | Protein synthesis and folding.                                                                                                                |
| 226 | NADH dehydrogenase [ubiquinone] 1 alpha subcomplex subunit 5   | Q16718  | [1]/[1] | 0       | [1]/[1] | 0       | 0       | 0       | [1]/[1] | 0       | 2 | 1 | Mitochondrion                        | Respiratory Chain. Electron transport.                                                                                                        |
| 227 | Proteasome subunit alpha type-3                                | P25788  | 0       | 0       | 0       | [1]/[1] | [1]/[1] | 0       | 0       | [1]/[1] | 2 | 1 | Cytoplasm                            | Part of ATP-dependent multicatalytic proteinase complex.                                                                                      |

|     |                                                                     |        |         |         |         |         |         |         |         |         |   |   |                                                 |                                                                                                                                                                |
|-----|---------------------------------------------------------------------|--------|---------|---------|---------|---------|---------|---------|---------|---------|---|---|-------------------------------------------------|----------------------------------------------------------------------------------------------------------------------------------------------------------------|
| 228 | Proteasome subunit beta type-6                                      | P28072 | 0       | 0       | 0       | [1]/[1] | [1]/[1] | 0       | 0       | [1]/[1] | 2 | 1 | Cytoplasm                                       | Part of ATP-dependent multicatalytic proteinase complex.                                                                                                       |
| 229 | Single-stranded DNA-binding protein, mitochondrial                  | Q04837 | [1]/[1] | 0       | 0       | [1]/[1] | 0       | [1]/[1] | 0       | 0       | 2 | 1 | Mitochondrion                                   | DNA replication.                                                                                                                                               |
| 230 | Thioredoxin domain-containing protein 1                             | Q9H3N1 | 0       | 0       | [1]/[1] | 0       | [1]/[1] | 0       | [1]/[1] | 0       | 2 | 1 | Membrane, ER                                    | Redox reactions.                                                                                                                                               |
| 231 | Tryptophanyl-tRNA synthetase, cytoplasmic                           | P23381 | 0       | 0       | 0       | [1]/[1] | [1]/[1] | 0       | 0       | [1]/[1] | 2 | 1 | Cytoplasm                                       | Protein synthesis.                                                                                                                                             |
| 232 | Voltage-dependent anion-selective channel protein 3                 | Q9Y277 | [1]/[1] | 0       | 0       | [1]/[1] | 0       | 0       | 0       | [1]/[1] | 2 | 1 | Mitochondrion                                   | Channel for small hydrophilic molecules.                                                                                                                       |
| 233 | 14-3-3 protein epsilon                                              | P62258 | 0       | 0       | 0       | 5/4     | 4/4     | 0       | 0       | 0       | 2 | 0 | Cytoplasm                                       | Regulates signal transduction pathways.                                                                                                                        |
| 234 | 3-hydroxyacyl-CoA dehydrogenase type-2                              | Q99714 | 2/2     | 0       | 0       | 0       | [1]/[1] | 0       | 0       | 0       | 2 | 0 | PM                                              | Lipid metabolism. Oxidation reduction.                                                                                                                         |
| 235 | 40S ribosomal protein S18                                           | P62269 | 0       | 0       | 0       | 2/2     | 2/2     | 0       | 0       | 0       | 2 | 0 | Cytoplasm                                       | Protein synthesis.                                                                                                                                             |
| 236 | 40S ribosomal protein S3a                                           | P61247 | 0       | 0       | 0       | 2/2     | 3/3     | 0       | 0       | 0       | 2 | 0 | Cytoplasm                                       | Protein synthesis.                                                                                                                                             |
| 237 | 4F2 cell-surface antigen heavy chain                                | P08195 | 0       | 0       | 6/5     | 3/3     | 0       | 0       | 0       | 0       | 2 | 0 | PM, Melanosome                                  | Amino acid transport.                                                                                                                                          |
| 238 | Actin-related protein 3                                             | P61158 | 0       | 0       | 2/2     | 4/4     | 0       | 0       | 0       | 0       | 2 | 0 | Cytoplasm                                       | Cytoskeleton.                                                                                                                                                  |
| 239 | Adipophilin                                                         | Q99541 | 0       | 10/10   | 0       | 0       | 4/4     | 0       | 0       | 0       | 2 | 0 | Membrane (lipid droplet and raft)               | Serves as scaffolding during lipid droplet formation.                                                                                                          |
| 240 | ADP-ribosylation factor 3                                           | P61204 | 0       | 4/4     | 0       | 2/2     | 0       | 0       | 0       | 0       | 2 | 0 | Golgi, Cytoplasmic vesicles                     | Regulation of membrane traffic and cytoskeleton.                                                                                                               |
| 241 | Annexin A11                                                         | P50995 | 0       | 4/4     | 0       | 0       | [1]/[1] | 0       | 0       | 0       | 2 | 0 | Cytoplasm, Nucleus, Melanosome                  | Calcium-dependent phospholipid binding.                                                                                                                        |
| 242 | Aspartyl-tRNA synthetase, cytoplasmic                               | P14868 | 0       | 2/2     | 0       | [1]/[1] | 0       | 0       | 0       | 0       | 2 | 0 | Cytoplasm                                       | Protein synthesis.                                                                                                                                             |
| 243 | ATP synthase subunit e, mitochondrial                               | P56385 | 2/2     | 0       | 0       | [1]/[1] | 0       | 0       | 0       | 0       | 2 | 0 | Mitochondrion                                   | ATP synthesis. Ion transport.                                                                                                                                  |
| 244 | ATP-citrate synthase                                                | P53396 | 0       | 4/4     | 0       | 5/5     | 0       | 0       | 0       | 0       | 2 | 0 | Cytosol                                         | Synthesis of cytosolic acetyl-CoA .                                                                                                                            |
| 245 | Beta-1-syntrophin                                                   | Q13884 | 0       | 0       | [1]/[1] | 0       | 3/3     | 0       | 0       | 0       | 2 | 0 | PM, Cytoplasm                                   | Cytoskeleton. Adaptor protein. Links membrane receptors to actin cytoskeleton.                                                                                 |
| 246 | Carboxypeptidase D                                                  | O75976 | 0       | 0       | 0       | 7/7     | 3/3     | 0       | 0       | 0       | 2 | 0 | Membrane                                        | Metalloprotease.                                                                                                                                               |
| 247 | Cation-independent mannose-6-phosphate receptor                     | P11717 | 0       | 0       | 0       | 14/14   | 5/5     | 0       | 0       | 0       | 2 | 0 | Late endosome, Trans-Golgi network              | Transport of phosphorylated lysosomal enzymes from the Golgi complex and the cell surface to lysosomes.                                                        |
| 248 | CD166 antigen                                                       | Q13740 | 0       | 0       | 2/2     | 4/4     | 0       | 0       | 0       | 0       | 2 | 0 | PM                                              | Cell-cell interaction.                                                                                                                                         |
| 249 | Dihydropyrimidinase-related protein 2                               | Q16555 | 0       | [1]/[1] | 0       | 3/3     | 0       | 0       | 0       | 0       | 2 | 0 | Cytoplasm                                       | Necessary for signaling by class 3 semaphorins and subsequent remodeling of the cytoskeleton.                                                                  |
| 250 | Galactosylgalactosylxylosylprotein 3-beta-glucuronosyltransferase 3 | O94766 | 0       | 0       | 0       | 2/2     | 2/2     | 0       | 0       | 0       | 2 | 0 | Golgi                                           | Protein modification. Protein glycosylation.                                                                                                                   |
| 251 | Galectin-1                                                          | P09382 | 0       | 0       | [1]/[1] | 4/4     | 0       | 0       | 0       | 0       | 2 | 0 | PM, Golgi                                       | Beta-galactoside-binding lectin. Has a prominent role in regulating cell adhesion, cell growth and immune responses.                                           |
| 252 | Glutathione transferase omega-1                                     | P78417 | 0       | 0       | 0       | 2/2     | [1]/[1] | 0       | 0       | 0       | 2 | 0 | Cytoplasm                                       | Detoxification of electrophilic compounds, including drugs, toxins, and products of oxidative stress.                                                          |
| 253 | Golgi integral membrane protein 4                                   | O00461 | 0       | 0       | 0       | 2/2     | [1]/[1] | 0       | 0       | 0       | 2 | 0 | Golgi, Endosome                                 | Plays a role in endosome to Golgi protein trafficking. Mediates protein transport along the late endosome-bypass pathway from the early endosome to the Golgi. |
| 254 | Golgin subfamily B member 1                                         | Q14789 | 0       | 0       | 0       | [1]/[1] | 2/2     | 0       | 0       | 0       | 2 | 0 | Golgi, ER-Golgi intermediate compartment        | Forms intercisternal cross-bridges of the Golgi complex.                                                                                                       |
| 255 | Heparan sulfate 2-O-sulfotransferase 1                              | Q7LGA3 | 0       | 0       | 0       | [1]/[1] | 2/2     | 0       | 0       | 0       | 2 | 0 | Golgi                                           | Heparan sulfate biosynthesis.                                                                                                                                  |
| 256 | Histone H4                                                          | P62805 | 0       | 0       | 3/3     | 2/2     | 0       | 0       | 0       | 0       | 2 | 0 | Nucleus                                         | Component of nucleosome.                                                                                                                                       |
| 257 | Mitochondrial inner membrane protein                                | Q16891 | [1]/[1] | 0       | 0       | 0       | 5/5     | 0       | 0       | 0       | 2 | 0 | Mitochondrion inner membrane                    | Unknown. May be involved in protein import.                                                                                                                    |
| 258 | Monocyte differentiation antigen CD14                               | P08571 | 0       | 0       | 2/2     | 0       | 2/2     | 0       | 0       | 0       | 2 | 0 | PM                                              | Interacts with MD-2 and TLR4 to mediate innate immune response to bacterial lipopolysaccharide.                                                                |
| 259 | Polypeptide N-acetylgalactosaminyltransferase 2                     | Q10471 | 0       | 0       | 0       | 5/5     | 5/5     | 0       | 0       | 0       | 2 | 0 | Golgi, Secreted protein                         | Protein glycosylation.                                                                                                                                         |
| 260 | Prohibitin                                                          | P35232 | 3/3     | 0       | 0       | [1]/[1] | 0       | 0       | 0       | 0       | 2 | 0 | Mitochondrion, PM, Nucleoplasm, Lipid rafts     | Inhibit DNA synthesis. Modulate gene expression. Chaperones for imported proteins in mitochondria (reviewed by Mishra et al., 2006).                           |
| 261 | Proteasome subunit alpha type-6                                     | P60900 | 0       | 0       | 0       | 2/2     | 3/3     | 0       | 0       | 0       | 2 | 0 | Cytoplasm                                       | Part of ATP-dependent multicatalytic proteinase complex.                                                                                                       |
| 262 | Protein S100-A11                                                    | P31949 | 0       | 3/3     | 0       | 5/5     | 0       | 0       | 0       | 0       | 2 | 0 | Cytoplasm, PM, Sarcoplasmic reticulum of muscle | Calcium-dependent actin binding protein involved in the regulation of actin filaments (Zhao et al., 2000).                                                     |

|     |                                                              |        |         |         |         |         |         |   |   |   |   |   |                                                      |                                                                                                                                                                                              |
|-----|--------------------------------------------------------------|--------|---------|---------|---------|---------|---------|---|---|---|---|---|------------------------------------------------------|----------------------------------------------------------------------------------------------------------------------------------------------------------------------------------------------|
| 263 | Putative annexin A2-like protein                             | A6NMY6 | 2/2     | 0       | 2/2     | 0       | 0       | 0 | 0 | 0 | 2 | 0 | Secreted protein, Melanosome                         | Calcium-regulated membrane-binding protein whose affinity for calcium is greatly enhanced by anionic phospholipids (By similarity). May be involved in heat-stress response (By similarity). |
| 264 | Rab GDP dissociation inhibitor beta                          | P50395 | 0       | 0       | 0       | 3/3     | 4/4     | 0 | 0 | 0 | 2 | 0 | Cytoplasm                                            | Regulator/Rab GTP/GDP exchange.                                                                                                                                                              |
| 265 | Ras-related protein Rab-2A                                   | P61019 | 0       | 0       | 0       | 2/2     | [1]/[1] | 0 | 0 | 0 | 2 | 0 | Golgi                                                | Golgi to ER traffic.                                                                                                                                                                         |
| 266 | Ras-related protein Rab-5B                                   | P61020 | 0       | 0       | 0       | 2/2     | 3/3     | 0 | 0 | 0 | 2 | 0 | Endosome                                             | Vesicular trafficking.                                                                                                                                                                       |
| 267 | Ras-related protein Rab-10                                   | P61026 | 2/2     | 0       | 0       | 0       | 2/2     | 0 | 0 | 0 | 2 | 0 | Endosome                                             | Vesicular trafficking.                                                                                                                                                                       |
| 268 | Septin-11                                                    | Q9NVA2 | 0       | 0       | 2/2     | 0       | 4/4     | 0 | 0 | 0 | 2 | 0 | Cytoplasm                                            | GTPase. Cytokinesis. Exocytosis. Colocalizes with sub-membrane actin during the early stages of FcgammaR-mediated phagocytosis. Required for phagosome formation (Huang et al., 2008).       |
| 269 | Serine/threonine-protein kinase 10                           | O94804 | 0       | 0       | 0       | 2/2     | 2/2     | 0 | 0 | 0 | 2 | 0 | Cytoplasm                                            | Protein phosphorylation. Signal transduction.                                                                                                                                                |
| 270 | Sideroflexin-3                                               | Q9BWM7 | 2/2     | 0       | 0       | 0       | 3/3     | 0 | 0 | 0 | 2 | 0 | Mitochondrial Membrane                               | Potential iron transporter.                                                                                                                                                                  |
| 271 | Stomatin-like protein 2                                      | Q9UJZ1 | 3/3     | 0       | [1]/[1] | 0       | 0       | 0 | 0 | 0 | 2 | 0 | Membrane, Cytoplasm, Cytoskeleton                    | Unknown. Partitions into lipid rafts and contributes to T-cell receptor signaling (Kirchof et al., 2008).                                                                                    |
| 272 | Thioredoxin domain-containing protein 4                      | Q9BS26 | 0       | 0       | 0       | 3/3     | 5/5     | 0 | 0 | 0 | 2 | 0 | ER                                                   | Chaperone. May have a role in the control of oxidative protein folding in the endoplasmic reticulum.                                                                                         |
| 273 | Transmembrane 9 superfamily member 1                         | O15321 | 0       | 0       | 0       | 2/2     | 3/3     | 0 | 0 | 0 | 2 | 0 | Membrane                                             | Unknown.                                                                                                                                                                                     |
| 274 | Transmembrane 9 superfamily member 2                         | Q99805 | 0       | 0       | 0       | 2/2     | 3/3     | 0 | 0 | 0 | 2 | 0 | Endosome                                             | May function as a channel or small molecule transporter.                                                                                                                                     |
| 275 | Transmembrane 9 superfamily member 3                         | Q9HD45 | 0       | 0       | 0       | 4/4     | 3/3     | 0 | 0 | 0 | 2 | 0 | Membrane                                             | Unknown.                                                                                                                                                                                     |
| 276 | Transmembrane 9 superfamily member 4                         | Q92544 | 0       | 0       | 0       | 2/2     | 3/3     | 0 | 0 | 0 | 2 | 0 | Membrane                                             | Unknown.                                                                                                                                                                                     |
| 277 | Transmembrane protein 165                                    | Q9HC07 | 0       | 0       | 0       | 2/2     | 2/2     | 0 | 0 | 0 | 2 | 0 | Membrane                                             | Unknown.                                                                                                                                                                                     |
| 278 | Tubulin beta-2C chain                                        | P68371 | 0       | 13/12   | 9/0     | 11/11   | 0       | 0 | 0 | 0 | 2 | 0 | Cytoplasm                                            | Cytoskeleton.                                                                                                                                                                                |
| 279 | Uncharacterized protein KIAA2013                             | Q8IYS2 | 0       | [1]/[1] | 0       | 2/2     | 1/0     | 0 | 0 | 0 | 2 | 0 | Membrane                                             | Unknown.                                                                                                                                                                                     |
| 280 | UPF0404 protein C11orf59                                     | Q6IAA8 | [1]/[1] | 0       | 0       | 2/2     | 0       | 0 | 0 | 0 | 2 | 0 | Unknown                                              | Unknown.                                                                                                                                                                                     |
| 281 | Vesicle-fusing ATPase (NEM-sensitive fusion protein, NSF)    | P46459 | 0       | 0       | 2/2     | 4/4     | 0       | 0 | 0 | 0 | 2 | 0 | Cytoplasm                                            | Required for vesicle-mediated transport.                                                                                                                                                     |
| 282 | Vinculin                                                     | P18206 | 0       | 3/3     | 0       | 2/2     | 0       | 0 | 0 | 0 | 2 | 0 | Cytoplasm                                            | Cytoskeleton. May be involved in attachment of the actin microfilaments to PM.                                                                                                               |
| 283 | 60S ribosomal protein L12                                    | P30050 | 0       | 0       | [1]/[1] | [1]/[1] | 0       | 0 | 0 | 0 | 2 | 0 | Cytoplasm                                            | Protein synthesis.                                                                                                                                                                           |
| 284 | 60S ribosomal protein L15                                    | P61313 | 0       | [1]/[1] | 0       | 0       | [1]/[1] | 0 | 0 | 0 | 2 | 0 | Cytoplasm                                            | Protein synthesis.                                                                                                                                                                           |
| 285 | 60S ribosomal protein L27a                                   | P46776 | 0       | [1]/[1] | 0       | 0       | [1]/[1] | 0 | 0 | 0 | 2 | 0 | Cytoplasm                                            | Protein synthesis.                                                                                                                                                                           |
| 286 | AP-2 complex subunit beta-1                                  | P63010 | 0       | 0       | [1]/[1] | 0       | [1]/[1] | 0 | 0 | 0 | 2 | 0 | Membrane, Cytoplasmic vesicles                       | Component of the adaptor complexes which link clathrin to receptors in coated vesicles.                                                                                                      |
| 287 | ATP synthase subunit b, mitochondrial                        | P24539 | 0       | [1]/[1] | [1]/[1] | 0       | 0       | 0 | 0 | 0 | 2 | 0 | Mitochondrion                                        | ATP synthesis. Ion transport.                                                                                                                                                                |
| 288 | Beta-2-microglobulin                                         | P61769 | 0       | 0       | [1]/[1] | [1]/[1] | 0       | 0 | 0 | 0 | 2 | 0 | PM, early Endosome membrane, Golgi, Secreted Protein | Antigen processing and presentation via MHC class I.                                                                                                                                         |
| 289 | Bone marrow stromal antigen 2                                | Q10589 | 0       | 0       | [1]/[1] | 0       | [1]/[1] | 0 | 0 | 0 | 2 | 0 | Golgi, PM                                            | May be involved in the sorting of secreted proteins (By similarity).                                                                                                                         |
| 290 | Coatomer subunit gamma                                       | Q9Y678 | 0       | [1]/[1] | 0       | 0       | [1]/[1] | 0 | 0 | 0 | 2 | 0 | Cytoplasm, Cytoplasmic vesicle, Golgi                | Coat protein.                                                                                                                                                                                |
| 291 | Cytochrome c oxidase subunit 5B, mitochondrial               | P10606 | [1]/[1] | 0       | [1]/[1] | 0       | 0       | 0 | 0 | 0 | 2 | 0 | Mitochondrion                                        | Electron transport. Respiratory chain. Apoptosis. Caspase activation.                                                                                                                        |
| 292 | Cytosol aminopeptidase                                       | P28838 | 0       | 0       | 0       | [1]/[1] | [1]/[1] | 0 | 0 | 0 | 2 | 0 | Cytoplasm                                            | Processing and turnover of intracellular proteins.                                                                                                                                           |
| 293 | EF-hand domain-containing protein D2                         | Q96C19 | 0       | 0       | 0       | [1]/[1] | [1]/[1] | 0 | 0 | 0 | 2 | 0 | Unknown                                              | Unknown.                                                                                                                                                                                     |
| 294 | ERO1-like protein alpha                                      | Q96HE7 | 0       | 0       | 0       | [1]/[1] | [1]/[1] | 0 | 0 | 0 | 2 | 0 | ER                                                   | Disulfide bond formation.                                                                                                                                                                    |
| 295 | Fumarate hydratase, mitochondrial                            | P07954 | [1]/[1] | 0       | 0       | 0       | [1]/[1] | 0 | 0 | 0 | 2 | 0 | Mitochondrion, Cytoplasm                             | Carbohydrate metabolism.                                                                                                                                                                     |
| 296 | Golgi-associated plant pathogenesis-related protein 1        | Q9H4G4 | [1]/[1] | 0       | 0       | [1]/[1] | 0       | 0 | 0 | 0 | 2 | 0 | Golgi                                                | Unknown.                                                                                                                                                                                     |
| 297 | Hydroxyacyl-coenzyme A dehydrogenase, mitochondrial          | Q16836 | [1]/[1] | 0       | [1]/[1] | 0       | 0       | 0 | 0 | 0 | 2 | 0 | Mitochondrion                                        | Lipid metabolism. Fatty acid beta-oxidation.                                                                                                                                                 |
| 298 | LETM1 and EF-hand domain-containing protein 1, mitochondrial | O95202 | [1]/[1] | 0       | [1]/[1] | 0       | 0       | 0 | 0 | 0 | 2 | 0 | Mitochondrion                                        | May play a role in mitochondrial morphology.                                                                                                                                                 |

|     |                                                                |        |         |         |         |         |         |         |         |         |   |   |                                               |                                                                                                                                                                                                                           |
|-----|----------------------------------------------------------------|--------|---------|---------|---------|---------|---------|---------|---------|---------|---|---|-----------------------------------------------|---------------------------------------------------------------------------------------------------------------------------------------------------------------------------------------------------------------------------|
| 299 | Lon protease homolog, mitochondrial                            | P36776 | 0       | 0       | 0       | [1]/[1] | [1]/[1] | 0       | 0       | 0       | 2 | 0 | Mitochondrion                                 | ATP-dependent proteolysis.                                                                                                                                                                                                |
| 300 | Major facilitator superfamily domain-containing protein 1      | Q9H3U5 | 0       | 0       | 0       | [1]/[1] | [1]/[1] | 0       | 0       | 0       | 2 | 0 | Membrane                                      | Unknown.                                                                                                                                                                                                                  |
| 301 | Minor histocompatibility antigen H13                           | Q8TCT9 | 0       | 0       | 0       | [1]/[1] | [1]/[1] | 0       | 0       | 0       | 2 | 0 | ER membrane                                   | Catalyzes intramembrane proteolysis of some signal peptides after they have been cleaved from a preprotein.                                                                                                               |
| 302 | Mitochondrial import receptor subunit TOM22 homolog            | Q9NS69 | [1]/[1] | 0       | [1]/[1] | 0       | 0       | 0       | 0       | 0       | 2 | 0 | Mitochondrion                                 | Receptor component of mitochondria outer membrane translocase.                                                                                                                                                            |
| 303 | Protein CASC4                                                  | Q6P4E1 | 0       | 0       | 0       | [1]/[1] | [1]/[1] | 0       | 0       | 0       | 2 | 0 | Membrane                                      | Unknown.                                                                                                                                                                                                                  |
| 304 | Protein transport protein Sec61 subunit gamma                  | P60059 | 0       | 0       | [1]/[1] | [1]/[1] | 0       | 0       | 0       | 0       | 2 | 0 | ER                                            | Protein translocation.                                                                                                                                                                                                    |
| 305 | Proto-oncogene vav                                             | P15498 | 0       | 0       | 0       | [1]/[1] | [1]/[1] | 0       | 0       | 0       | 2 | 0 | Cytoplasm, Cytoplasmic vesicles               | Regulation of Rho-signal transduction.                                                                                                                                                                                    |
| 306 | SH3 domain-binding glutamic acid-rich-like protein 3           | Q9H299 | 0       | [1]/[1] | 0       | [1]/[1] | 0       | 0       | 0       | 0       | 2 | 0 | Nucleus, Cytoplasm                            | May act as modulator of glutaredoxin activity.                                                                                                                                                                            |
| 307 | Syntaxin-3                                                     | Q13277 | [1]/[1] | 0       | 0       | 0       | [1]/[1] | 0       | 0       | 0       | 2 | 0 | Membrane, Vacuole, Golgi                      | Docking of synaptic vesicles at presynaptic active zones.                                                                                                                                                                 |
| 308 | Transaldolase                                                  | P37837 | 0       | 0       | 0       | [1]/[1] | [1]/[1] | 0       | 0       | 0       | 2 | 0 | Cytoplasm                                     | Carbohydrate degradation. Pentose-phosphate pathway.                                                                                                                                                                      |
| 309 | Transforming growth factor-beta-induced protein ig-h3          | Q15582 | 0       | 0       | 0       | [1]/[1] | [1]/[1] | 0       | 0       | 0       | 2 | 0 | Secreted protein                              | Binds collagen type I, II, IV.                                                                                                                                                                                            |
| 310 | Translocon-associated protein subunit delta                    | P51571 | 0       | 0       | [1]/[1] | [1]/[1] | 0       | 0       | 0       | 0       | 2 | 0 | ER                                            | Binds calcium to the ER membrane. Regulates the retention of ER resident proteins.                                                                                                                                        |
| 311 | UPF0539 protein C7orf59                                        | Q0VGL1 | 0       | 0       | [1]/[1] | [1]/[1] | 0       | 0       | 0       | 0       | 2 | 0 | Unknown                                       | Unknown.                                                                                                                                                                                                                  |
| 312 | Vacuolar proton pump subunit D                                 | Q9Y5K8 | [1]/[1] | 0       | 0       | [1]/[1] | 0       | 0       | 0       | 0       | 2 | 0 | Intracellular compartments, Endosome-Lysosome | Compartment acidification.                                                                                                                                                                                                |
| 313 | 40S ribosomal protein S14                                      | P62263 | 0       | 0       | 0       | 2/2     | 0       | [1]/[1] | [1]/[1] | 0       | 1 | 2 | Cytoplasm                                     | Protein synthesis.                                                                                                                                                                                                        |
| 314 | Dihydrolipoyl dehydrogenase, mitochondrial                     | P09622 | 2/2     | 0       | 0       | 0       | 0       | 2/2     | [1]/[1] | 0       | 1 | 2 | Mitochondrion                                 | Component of the glycine cleavage system and the alpha-ketoacid dehydrogenase complex.                                                                                                                                    |
| 315 | Glucosylceramidase                                             | P04062 | 2/2     | 0       | 0       | 0       | 0       | 4/4     | 0       | 2/2     | 1 | 2 | Lysosome                                      | Remove D-glucose from D-glucosyl-N-acylsphingosine. Modify proteins for degradation by proteasome. Regulation of cell signaling and intra-endosomal membrane traffic (Haglund and Dikic, 2005; Goot and Gruenberg, 2006). |
| 316 | Ubiquitin                                                      | P62988 | 0       | 0       | 0       | 2/2     | 0       | 2/2     | 2/2     | 0       | 1 | 2 | Cytoplasm, Nucleus, Endosome-Lysosome         |                                                                                                                                                                                                                           |
| 317 | Mitogen-activated protein-binding protein-interacting protein  | Q9Y2Q5 | [1]/[1] | 0       | 0       | 0       | 0       | [1]/[1] | [1]/[1] | 0       | 1 | 2 | Late endosome, Lysosome                       | Facilitates the activation of MAPK2.                                                                                                                                                                                      |
| 318 | 40S ribosomal protein S8                                       | P62241 | 0       | 0       | 0       | 2/2     | 0       | 0       | 0       | [1]/[1] | 1 | 1 | Cytoplasm                                     | Protein synthesis.                                                                                                                                                                                                        |
| 319 | 40S ribosomal protein S9                                       | P46781 | 0       | 0       | 0       | 0       | 2/2     | 0       | 0       | [1]/[1] | 1 | 1 | Cytoplasm                                     | Protein synthesis.                                                                                                                                                                                                        |
| 320 | 60S ribosomal protein L11                                      | P62913 | 0       | 0       | 0       | 3/3     | 0       | 2       | 0       | 0       | 1 | 1 | Cytoplasm                                     | Protein synthesis.                                                                                                                                                                                                        |
| 321 | Actin-related protein 2/3 complex subunit 2                    | O15144 | 0       | 0       | 0       | 3/3     | 0       | 0       | 0       | 2/2     | 1 | 1 | Cytoplasm                                     | Cytoskeleton. F-actin assembly.                                                                                                                                                                                           |
| 322 | Annexin A6                                                     | P08133 | 0       | 0       | 0       | 3/3     | 0       | 0       | 0       | 6/6     | 1 | 1 | Cytoplasm, Melanosome                         | May associate with CD21. May regulate the release of Ca(2+) from intracellular stores.                                                                                                                                    |
| 323 | Band 4.1-like protein 2                                        | O43491 | 0       | 0       | 0       | 0       | 3/3     | 0       | 0       | 2/2     | 1 | 1 | Membrane                                      | Links membrane to cytoskeleton.                                                                                                                                                                                           |
| 324 | Bifunctional aminoacyl-tRNA synthetase                         | P07814 | 0       | 0       | 0       | 0       | 2/2     | 0       | 0       | 6/6     | 1 | 1 | Cytoplasm                                     | Protein synthesis.                                                                                                                                                                                                        |
| 325 | CAAX prenyl protease 1 homolog                                 | O75844 | 0       | 0       | 0       | 0       | 2/2     | 0       | 2/2     | 0       | 1 | 1 | ER, Golgi                                     | Removes the C-terminal 3 residues of farnesylated proteins.                                                                                                                                                               |
| 326 | Clathrin heavy chain 1                                         | Q00610 | 0       | 12/12   | 0       | 0       | 0       | 0       | 0       | 3/3     | 1 | 1 | Membrane, Cytoplasmic vesicles                | Major protein of the polyhedral coat of coated pits and vesicles.                                                                                                                                                         |
| 327 | Elongation factor 1-delta                                      | P29692 | 0       | 0       | 0       | 0       | 2/2     | 0       | 0       | 2/2     | 1 | 1 | Cytoplasm                                     | Protein synthesis and folding.                                                                                                                                                                                            |
| 328 | Epididymal secretory protein E1 (NPC2)                         | P61916 | 3/3     | 0       | 0       | 0       | 0       | 2/2     | 0       | 0       | 1 | 1 | Lysosome, Secreted protein                    | Lipid transport.                                                                                                                                                                                                          |
| 329 | Fatty acid synthase                                            | P49327 | 0       | 12/12   | 0       | 0       | 0       | 0       | 0       | [1]/[1] | 1 | 1 | Cytoplasm, Melanosome                         | Lipid synthesis.                                                                                                                                                                                                          |
| 330 | Fatty acid-binding protein, epidermal                          | Q01469 | 0       | 0       | 2/2     | 0       | 0       | 0       | 0       | 2/2     | 1 | 1 | Cytoplasm                                     | Lipid chaperone. Expressed in adipocytes and macrophages.                                                                                                                                                                 |
| 331 | Gamma-glutamyl hydrolase                                       | Q92820 | 5/5     | 0       | 0       | 0       | 0       | 2/2     | 0       | 0       | 1 | 1 | Lysosome, Secreted protein, Melanosome        | Hydrolyze pteroyl/polyglutamate.                                                                                                                                                                                          |
| 332 | Heat shock 70 kDa protein 4                                    | P34932 | 0       | 0       | 0       | [1]/[1] | 0       | 0       | 0       | 4/4     | 1 | 1 | Cytoplasm                                     | Chaperone.                                                                                                                                                                                                                |
| 333 | Heat shock 70 kDa protein 6                                    | P17066 | 0       | 0       | 0       | 6/6     | 0       | 0       | 0       | 4/4     | 1 | 1 | Cytoplasm                                     | Chaperone. Stabilize and fold proteins.                                                                                                                                                                                   |
| 334 | Isoleucyl-tRNA synthetase, cytoplasmic                         | P41252 | 0       | 2/2     | 0       | 0       | 0       | 0       | 0       | 3/3     | 1 | 1 | Cytoplasm                                     | Protein synthesis.                                                                                                                                                                                                        |
| 335 | Liver carboxylesterase 1 (Monocyte/macrophage serine esterase) | P23141 | 0       | 0       | 0       | 0       | 4/4     | 0       | 0       | 2/2     | 1 | 1 | ER                                            | Detoxification. Hydrolyzes aromatic and aliphatic esters.                                                                                                                                                                 |
| 336 | Lysozyme C                                                     | P61626 | 0       | 0       | 0       | 2/2     | 0       | 0       | 0       | [1]/[1] | 1 | 1 | Lysosome                                      | Carbohydrate degradation.                                                                                                                                                                                                 |
| 337 | Myosin regulatory light chain MRLC2                            | O14950 | 0       | 0       | 2/2     | 0       | 0       | 0       | 0       | 2/2     | 1 | 1 | Cytoplasm, Myosin complex                     | Myosin regulatory subunit. Implicated in cytokinesis, receptor capping, and cell locomotion.                                                                                                                              |



|     |                                                                    |        |         |     |     |         |         |         |         |         |   |   |                                                   |                                                                                                                                                                |
|-----|--------------------------------------------------------------------|--------|---------|-----|-----|---------|---------|---------|---------|---------|---|---|---------------------------------------------------|----------------------------------------------------------------------------------------------------------------------------------------------------------------|
| 338 | Myristoylated alanine-rich C-kinase substrate                      | P29966 | 0       | 0   | 0   | 0       | 3/3     | 0       | 0       | 2/2     | 1 | 1 | Cytoplasm, Cytoskeleton, Membrane                 | Protein kinase C substrate. Binds calmodulin, actin, and synapsin. F-actin cross-linking protein.                                                              |
| 339 | Non-specific lipid-transfer protein                                | P22307 | 0       | 0   | 3/3 | 0       | 0       | [1]/[1] | 0       | 0       | 1 | 1 | Cytoplasm, Mitochondrion, Peroxisome              | Transfer phospholipids, cholesterol and gangliosides between membranes.                                                                                        |
| 340 | P2X purinoceptor 4                                                 | Q99571 | 0       | 0   | 0   | 2/2     | 0       | 0       | [1]/[1] | 0       | 1 | 1 | Membrane, PM                                      | Receptor for ATP that acts as a ligand gated ion channel.                                                                                                      |
| 341 | Peptidyl-prolyl cis-trans isomerase A                              | P62937 | 0       | 0   | 0   | 8/8     | 0       | 0       | 0       | 4/4     | 1 | 1 | Cytoplasm                                         | Chaperone. Protein folding.                                                                                                                                    |
| 342 | Phosphatidylinositol 4-kinase type 2 alpha                         | Q9BTU6 | 3/3     | 0   | 0   | 0       | 0       | 4/4     | 0       | 0       | 1 | 1 | Cytoplasm, Membrane (non-caveolar membrane rafts) | 1-Phosphatidylinositol 4-kinase activity. Contributes to the production of inositol 1,4,5-trisphosphate in stimulated cells (By similarity).                   |
| 343 | Profilin-1                                                         | P07737 | 0       | 0   | 0   | 4/4     | 0       | 0       | 0       | 2/2     | 1 | 1 | Cytoplasm                                         | Cytoskeleton. Binds actin and affects the structure of the cytoskeleton.                                                                                       |
| 344 | Proteasome subunit beta type-4                                     | P28070 | 0       | 0   | 0   | 2/2     | 0       | 0       | 0       | [1]/[1] | 1 | 1 | Cytoplasm                                         | Part of ATP-dependent multicatalytic proteinase complex.                                                                                                       |
| 345 | Ras-related protein Rab-8A                                         | P61006 | 0       | 0   | 3/3 | 0       | 0       | 0       | 4/4     | 0       | 1 | 1 | Membrane                                          | Vesicular trafficking.                                                                                                                                         |
| 346 | T-complex protein 1 subunit alpha                                  | P17987 | 0       | 6/6 | 0   | 0       | 0       | 0       | 0       | 3/3     | 1 | 1 | Cytoplasm                                         | Molecular chaperone. Assists the folding of proteins upon ATP hydrolysis. Known to play a role, in vitro, in the folding of actin and tubulin.                 |
| 347 | T-complex protein 1 subunit delta                                  | P50991 | 0       | 0   | 0   | 2/2     | 0       | 0       | 0       | 9/9     | 1 | 1 | Cytoplasm, Melanosome                             | Molecular chaperone. Assists the folding of proteins upon ATP hydrolysis. Known to play a role, in vitro, in the folding of actin and tubulin.                 |
| 348 | Tropomyosin alpha-3 chain                                          | P06753 | 0       | 0   | 0   | [1]/[1] | 0       | 0       | 0       | 5/5     | 1 | 1 | Cytoplasm                                         | Cytoskeleton. Binds to actin filaments in muscle and non-muscle cells.                                                                                         |
| 349 | Tyrosyl-tRNA synthetase, cytoplasmic                               | P54577 | 0       | 0   | 0   | 0       | [1]/[1] | 0       | 0       | 4/4     | 1 | 1 | Cytoplasm                                         | Protein synthesis.                                                                                                                                             |
| 350 | Ubiquitin-conjugating enzyme E2 variant 2                          | Q15819 | 0       | 0   | 0   | 2/2     | 0       | 0       | 0       | 2/2     | 1 | 1 | Cytoplasm                                         | Poly-ubiquitination.                                                                                                                                           |
| 351 | Ubiquitin-like modifier-activating enzyme 1                        | P22314 | 0       | 0   | 0   | 2/2     | 0       | 0       | 0       | 2/2     | 1 | 1 | Cytoplasm                                         | Ubiquitin conjugation pathway.                                                                                                                                 |
| 352 | Uncharacterized protein KIAA0174                                   | P53990 | 0       | 0   | 0   | 0       | [1]/[1] | 0       | 3/3     | 0       | 1 | 1 | ER-Golgi intermediate compartment                 | Unknown.                                                                                                                                                       |
| 353 | Vacuolar proton translocating ATPase 116 kDa subunit a isoform 1   | Q93050 | 0       | 0   | 0   | 2/2     | 0       | 0       | 2/2     | 0       | 1 | 1 | Cytoplasmic vesicle membrane                      | Required for assembly and activity of the vacuolar ATPase.                                                                                                     |
| 354 | WD repeat-containing protein 1                                     | O75083 | 0       | 0   | 0   | [1]/[1] | 0       | 0       | 0       | 4/4     | 1 | 1 | Cytoplasm                                         | Cytoskeleton. Induces disassembly of actin filaments in conjunction with ADF/cofilin family proteins.                                                          |
| 355 | ATP synthase subunit d, mitochondrial                              | O75947 | [1]/[1] | 0   | 0   | 0       | 0       | [1]/[1] | 0       | 0       | 1 | 1 | Mitochondrion                                     | ATP synthesis. Ion transport.                                                                                                                                  |
| 356 | Claathrin light chain A                                            | P09496 | 0       | 0   | 0   | [1]/[1] | 0       | 0       | 0       | [1]/[1] | 1 | 1 | Cytoplasmic vesicles                              | Major protein of the polyhedral coat of coated pits and vesicles. Critical component of the membrane-bound oxidase of phagocytes that generates superoxide.    |
| 357 | Cytochrome b-245 heavy chain                                       | P04839 | 0       | 0   | 0   | 0       | [1]/[1] | 0       | [1]/[1] | 0       | 1 | 1 | Membrane                                          | Electron transport. Respiratory chain. Apoptosis. Caspase activation.                                                                                          |
| 358 | Cytochrome c                                                       | P99999 | [1]/[1] | 0   | 0   | 0       | 0       | 0       | [1]/[1] | 0       | 1 | 1 | Mitochondrion                                     | ATPase motor. Drives vesicles and organelles to minus end of microtubules.                                                                                     |
| 359 | Cytoplasmic dynein 1 heavy chain 1                                 | Q14204 | 0       | 0   | 0   | [1]/[1] | 0       | 0       | 0       | [1]/[1] | 1 | 1 | Cytoplasm                                         | Stabilizer subunit of the dolichol-phosphate-mannose synthase complex.                                                                                         |
| 360 | Dolichol-phosphate mannosyltransferase subunit 3                   | Q9P2X0 | 0       | 0   | 0   | [1]/[1] | 0       | 0       | [1]/[1] | 0       | 1 | 1 | ER membrane                                       | Transfers electrons to the main mitochondrial respiratory chain.                                                                                               |
| 361 | Electron transfer flavoprotein subunit alpha, mitochondrial        | P13804 | [1]/[1] | 0   | 0   | 0       | 0       | 0       | [1]/[1] | 0       | 1 | 1 | Mitochondrion                                     | Transmembrane signaling.                                                                                                                                       |
| 362 | Guanine nucleotide-binding protein G(I)/G(S)/G(O) subunit gamma-12 | Q9UBI6 | 0       | 0   | 0   | [1]/[1] | 0       | 0       | [1]/[1] | 0       | 1 | 1 | Membrane                                          | Prevents the aggregation of denatured proteins in cells under severe stress.                                                                                   |
| 363 | Heat shock protein 105 kDa                                         | Q92598 | 0       | 0   | 0   | [1]/[1] | 0       | 0       | 0       | [1]/[1] | 1 | 1 | Cytoplasm                                         | Co-chaperone that binds to numerous kinases and promotes their interaction with the Hsp90 complex, resulting in stabilization and promotion of their activity. |
| 364 | Hsp90 co-chaperone Cdc37                                           | Q16543 | 0       | 0   | 0   | [1]/[1] | 0       | 0       | 0       | [1]/[1] | 1 | 1 | Cytoplasm                                         | Methylglyoxal degradation. Defence against glycation reactions.                                                                                                |
| 365 | Lactoylglutathione lyase                                           | Q04760 | 0       | 0   | 0   | 0       | [1]/[1] | 0       | 0       | [1]/[1] | 1 | 1 | Cytoplasm                                         | May play a role in mRNA stability.                                                                                                                             |
| 366 | Plasminogen activator inhibitor 1 RNA-binding protein              | Q8NC51 | 0       | 0   | 0   | [1]/[1] | 0       | 0       | 0       | [1]/[1] | 1 | 1 | Cytoplasm, Nucleus                                | Implicated in immunoproteasome assembly and required for efficient antigen processing.                                                                         |
| 367 | Proteasome activator complex subunit 1                             | Q06323 | 0       | 0   | 0   | [1]/[1] | 0       | 0       | 0       | [1]/[1] | 1 | 1 | Cytoplasm                                         | Part of ATP-dependent multicatalytic proteinase complex.                                                                                                       |
| 368 | Proteasome subunit alpha type-4                                    | P25789 | 0       | 0   | 0   | [1]/[1] | 0       | 0       | 0       | [1]/[1] | 1 | 1 | Cytoplasm                                         | Part of ATP-dependent multicatalytic proteinase complex.                                                                                                       |
| 369 | Proteasome subunit beta type-2                                     | P49721 | 0       | 0   | 0   | [1]/[1] | 0       | 0       | 0       | [1]/[1] | 1 | 1 | Cytoplasm                                         | Possible melanogenic enzyme (by similarity).                                                                                                                   |
| 370 | Transmembrane glycoprotein NMB                                     | Q14956 | [1]/[1] | 0   | 0   | 0       | 0       | [1]/[1] | 0       | 0       | 1 | 1 | Membrane, Melanosome                              |                                                                                                                                                                |

|     |                                                                                                                  |        |     |         |     |         |       |   |   |         |   |   |                                        |                                                                                                                                                                                                                          |
|-----|------------------------------------------------------------------------------------------------------------------|--------|-----|---------|-----|---------|-------|---|---|---------|---|---|----------------------------------------|--------------------------------------------------------------------------------------------------------------------------------------------------------------------------------------------------------------------------|
| 371 | Tripeptidyl-peptidase 2                                                                                          | P29144 | 0   | [1]/[1] | 0   | 0       | 0     | 0 | 0 | [1]/[1] | 1 | 1 | Cytoplasm                              | Component of the proteolytic cascade acting downstream of the 26S proteasome in the ubiquitin-proteasome pathway.                                                                                                        |
| 372 | Xaa-Pro dipeptidase                                                                                              | P12955 | 0   | 0       | 0   | [1]/[1] | 0     | 0 | 0 | [1]/[1] | 1 | 1 | Unknown                                | Splits dipeptides with a prolyl or hydroxyprolyl residue in the C-terminal position.                                                                                                                                     |
| 373 | 14-3-3 protein eta                                                                                               | Q04917 | 0   | 0       | 0   | 3/3     | 0     | 0 | 0 | 0       | 1 | 0 | Cytoplasm                              | Regulates signal transduction pathways.                                                                                                                                                                                  |
| 374 | 2'-5'-oligoadenylate synthetase 2                                                                                | P29728 | 0   | 0       | 0   | 3/3     | 0     | 0 | 0 | 0       | 1 | 0 | Mitochondrion, Nucleus, Microsome, ER  | RNA degradation, IFN inducible. May play a role in mediating resistance to virus infection, control of cell growth, differentiation, and apoptosis.                                                                      |
| 375 | 6-phosphofructokinase type C                                                                                     | Q01813 | 0   | 2/2     | 0   | 0       | 0     | 0 | 0 | 0       | 1 | 0 | Cytoplasm                              | Glycolysis.                                                                                                                                                                                                              |
| 376 | 60S ribosomal protein L14                                                                                        | P50914 | 0   | 0       | 0   | 0       | 2/2   | 0 | 0 | 0       | 1 | 0 | Cytoplasm                              | Translational elongation.                                                                                                                                                                                                |
| 377 | Acetyl-CoA acetyltransferase, mitochondrial                                                                      | P24752 | 5/5 | 0       | 0   | 0       | 0     | 0 | 0 | 0       | 1 | 0 | Mitochondrion                          | Ketone body metabolism.                                                                                                                                                                                                  |
| 378 | Actin, cytoplasmic 2                                                                                             | P63261 | 0   | 0       | 0   | 0       | 40/16 | 0 | 0 | 0       | 1 | 0 | Cytoplasm                              | Cytoskeleton.                                                                                                                                                                                                            |
| 379 | Adipocyte plasma membrane-associated protein                                                                     | Q9HDC9 | 0   | 0       | 2/2 | 0       | 0     | 0 | 0 | 0       | 1 | 0 | Membrane                               | May play a role in adipocyte differentiation.                                                                                                                                                                            |
| 380 | ADP/ATP translocase 3                                                                                            | P12236 | 0   | 2/2     | 0   | 0       | 0     | 0 | 0 | 0       | 1 | 0 | Mitochondrion                          | ATP/ADP translocation.                                                                                                                                                                                                   |
| 381 | ADP-ribosylation factor 1                                                                                        | P84077 | 0   | 0       | 0   | 2/2     | 0     | 0 | 0 | 0       | 1 | 0 | Golgi, Cytosol, PM                     | Involved in protein trafficking among different compartments. Modulates vesicle budding and uncoating within the Golgi complex.                                                                                          |
| 382 | Aldehyde dehydrogenase, mitochondrial                                                                            | P05091 | 0   | 0       | 0   | 0       | 2/2   | 0 | 0 | 0       | 1 | 0 | Mitochondrion                          | Alcohol metabolism. Ethanol degradation.                                                                                                                                                                                 |
| 383 | Alpha-(1,6)-fucosyltransferase                                                                                   | Q9BYC5 | 0   | 0       | 0   | 2/2     | 0     | 0 | 0 | 0       | 1 | 0 | Golgi                                  | Glycosylation.                                                                                                                                                                                                           |
| 384 | Alpha-N-acetylgalactosaminidase                                                                                  | P17050 | 2/2 | 0       | 0   | 0       | 0     | 0 | 0 | 0       | 1 | 0 | Lysosome                               | Carbohydrate degradation.                                                                                                                                                                                                |
| 385 | Alpha-soluble NSF attachment protein                                                                             | P54920 | 0   | 0       | 0   | 0       | 2/2   | 0 | 0 | 0       | 1 | 0 | Membrane, Cytoplasmic vesicles         | Vesicular transport.                                                                                                                                                                                                     |
| 386 | Alpha-synuclein                                                                                                  | P37840 | 0   | 0       | 0   | 0       | 2/2   | 0 | 0 | 0       | 1 | 0 | Cytoplasm, Membrane, Nucleus           | Soluble protein present in presynaptic nerve terminals. In neuronal cells, regulates dopamine metabolism; associates with phospholipid vesicles, actin cytoskeleton, exhibits chaperone activity and interacts with tau. |
| 387 | ANKRD26-like family C member 1A                                                                                  | Q6S8J3 | 0   | 0       | 5/3 | 0       | 0     | 0 | 0 | 0       | 1 | 0 | Unknown                                | Unknown.                                                                                                                                                                                                                 |
| 388 | Arylsulfatase A                                                                                                  | P15289 | 3/3 | 0       | 0   | 0       | 0     | 0 | 0 | 0       | 1 | 0 | Lysosome                               | Hydrolyzes cerebroside sulfate.                                                                                                                                                                                          |
| 389 | Aspartate aminotransferase, mitochondrial (Fatty acid-binding protein)                                           | P00505 | 5/5 | 0       | 0   | 0       | 0     | 0 | 0 | 0       | 1 | 0 | Mitochondrion, PM                      | Aspartate catabolism. Lipid binding and transport (Isola et al., 1995; Zhou et al., 1995).                                                                                                                               |
| 390 | Chitinase-3-like protein 1                                                                                       | P36222 | 0   | 0       | 0   | 2/2     | 0     | 0 | 0 | 0       | 1 | 0 | Secreted protein                       | May play a role in tissue remodeling & defense against pathogens.                                                                                                                                                        |
| 391 | Complement component C9                                                                                          | P02748 | 2/2 | 0       | 0   | 0       | 0     | 0 | 0 | 0       | 1 | 0 | Secreted protein                       | Complement pathway.                                                                                                                                                                                                      |
| 392 | Cullin-associated NEDD8-dissociated protein 1                                                                    | Q86VP6 | 0   | 0       | 0   | 0       | 2/2   | 0 | 0 | 0       | 1 | 0 | Nucleus, Ubiquitin ligase complex      | Down-regulate ubiquitination of target proteins. Transcription enhancer.                                                                                                                                                 |
| 393 | Cytoskeleton-associated protein 4                                                                                | Q07065 | 0   | 0       | 0   | 0       | 2/2   | 0 | 0 | 0       | 1 | 0 | PM, ER, Golgi                          | Cytoskeletal binding. CKAP4/p63 is a plasma membrane receptor for the frizzled-8 protein-related antiproliferative factor (Conrads et al., 2006).                                                                        |
| 394 | Dihydrolypoyllysine-residue succinyltransferase component of 2-oxoglutarate dehydrogenase complex, mitochondrial | P36957 | 2/2 | 0       | 0   | 0       | 0     | 0 | 0 | 0       | 1 | 0 | Mitochondrion                          | Tricarboxylic acid cycle. Amino acid degradation.                                                                                                                                                                        |
| 395 | EH domain-containing protein 1                                                                                   | Q9H4M9 | 0   | 0       | 3/3 | 0       | 0     | 0 | 0 | 0       | 1 | 0 | PM, Early endosome, Recycling endosome | Acts in early endocytic membrane fusion and membrane trafficking of recycling endosomes.                                                                                                                                 |
| 396 | EH domain-containing protein 4                                                                                   | Q9H223 | 0   | 0       | 0   | 0       | 4/4   | 0 | 0 | 0       | 1 | 0 | Endosome                               | Plays a role in early endosomal transport. Functions in Arf6 regulated membrane recycling.                                                                                                                               |
| 397 | Electron transfer flavoprotein subunit beta                                                                      | P38117 | 0   | 3/3     | 0   | 0       | 0     | 0 | 0 | 0       | 1 | 0 | Mitochondrion                          | Electron transport chain.                                                                                                                                                                                                |
| 398 | Eukaryotic translation initiation factor 2 subunit 1                                                             | P05198 | 0   | 0       | 0   | 0       | 3/3   | 0 | 0 | 0       | 1 | 0 | Cytoplasm                              | Protein biosynthesis. Translation regulation.                                                                                                                                                                            |
| 399 | Golgin subfamily A member 3                                                                                      | Q08378 | 0   | 0       | 0   | 0       | 5/5   | 0 | 0 | 0       | 1 | 0 | Golgi, Cytoplasm                       | Probably involved in maintaining Golgi structure. Intra-Golgi vesicle mediated transport.                                                                                                                                |
| 400 | Golgin subfamily A member 5                                                                                      | Q8TBA6 | 0   | 0       | 0   | 0       | 4/4   | 0 | 0 | 0       | 1 | 0 | Golgi, Cytoplasm                       | Involved in maintaining Golgi structure. Golgi retrograde transport. Interacts with Rab1A.                                                                                                                               |
| 401 | Guanine nucleotide-binding protein alpha-13 subunit                                                              | Q14344 | 0   | 0       | 2/2 | 0       | 0     | 0 | 0 | 0       | 1 | 0 | Membrane, Melanosome                   | Modulator or transducer in transmembrane signaling.                                                                                                                                                                      |
| 402 | Guanine nucleotide-binding protein G(I)/G(S)/G(T) subunit beta-2                                                 | P62879 | 0   | 0       | 3/3 | 0       | 0     | 0 | 0 | 0       | 1 | 0 | Membrane                               | Modulator or transducer in transmembrane signaling.                                                                                                                                                                      |

|     |                                                                                                     |        |     |     |     |     |     |   |   |   |   |   |   |                                          |                                                                                                                                                                                                                                             |
|-----|-----------------------------------------------------------------------------------------------------|--------|-----|-----|-----|-----|-----|---|---|---|---|---|---|------------------------------------------|---------------------------------------------------------------------------------------------------------------------------------------------------------------------------------------------------------------------------------------------|
| 403 | Guanine nucleotide-binding protein subunit beta-2-like 1                                            | P63244 | 0   | 0   | 0   | 2/2 | 0   | 0 | 0 | 0 | 0 | 1 | 0 | Membrane                                 | Intracellular receptor to anchor activated PKC to the cytoskeleton.                                                                                                                                                                         |
| 404 | Heat shock 70 kDa protein 1L                                                                        | P34931 | 0   | 0   | 0   | 5/5 | 0   | 0 | 0 | 0 | 0 | 1 | 0 | Cytoplasm                                | Chaperone. Stabilize and fold proteins.                                                                                                                                                                                                     |
| 405 | Heat shock protein 75 kDa, mitochondrial (Tumor necrosis factor type 1 receptor-associated protein) | Q12931 | 3/3 | 0   | 0   | 0   | 0   | 0 | 0 | 0 | 0 | 1 | 0 | Mitochondrion                            | Chaperone. Binds to the intracellular domain of tumor necrosis factor type 1 receptor.                                                                                                                                                      |
| 406 | High affinity immunoglobulin epsilon receptor subunit gamma                                         | P30273 | 0   | 0   | 0   | 2/2 | 0   | 0 | 0 | 0 | 0 | 1 | 0 | Membrane                                 | Associates with a variety of FcR alpha chains to form a functional signaling complex. Regulates several aspects of the immune response. Has a critical role in allowing the IgE Fc receptor to reach the cell surface.                      |
| 407 | Histone H2B type 2-F                                                                                | Q5QNW6 | 0   | 0   | 2/2 | 0   | 0   | 0 | 0 | 0 | 0 | 1 | 0 | Nucleus                                  | Component of nucleosome.                                                                                                                                                                                                                    |
| 408 | HLA class I histocompatibility antigen, A-34 alpha chain                                            | P30453 | 0   | 0   | 0   | 0   | 8/7 | 0 | 0 | 0 | 0 | 1 | 0 | PM                                       | Antigen presentation.                                                                                                                                                                                                                       |
| 409 | HLA class I histocompatibility antigen, A-68 alpha chain                                            | P01891 | 0   | 0   | 0   | 0   | 4/4 | 0 | 0 | 0 | 0 | 1 | 0 | PM                                       | Antigen presentation.                                                                                                                                                                                                                       |
| 410 | HLA class I histocompatibility antigen, B-27 alpha chain                                            | P03989 | 0   | 0   | 2/2 | 0   | 0   | 0 | 0 | 0 | 0 | 1 | 0 | PM                                       | Antigen presentation.                                                                                                                                                                                                                       |
| 411 | HLA class I histocompatibility antigen, B-58 alpha chain                                            | P10319 | 2/2 | 0   | 0   | 0   | 0   | 0 | 0 | 0 | 0 | 1 | 0 | PM                                       | Antigen presentation.                                                                                                                                                                                                                       |
| 412 | HLA class I histocompatibility antigen, B-67 alpha chain                                            | Q29836 | 0   | 0   | 3/3 | 0   | 0   | 0 | 0 | 0 | 0 | 1 | 0 | PM                                       | Antigen presentation.                                                                                                                                                                                                                       |
| 413 | HLA class I histocompatibility antigen, Cw-16 alpha chain                                           | Q29960 | 0   | 0   | 0   | 0   | 5/4 | 0 | 0 | 0 | 0 | 1 | 0 | PM                                       | Antigen presentation.                                                                                                                                                                                                                       |
| 414 | Ig gamma-1 chain C region                                                                           | P01857 | 0   | 2/2 | 0   | 0   | 0   | 0 | 0 | 0 | 0 | 1 | 0 | Secreted protein                         | Immunoglobulin.                                                                                                                                                                                                                             |
| 415 | Ig mu chain C region                                                                                | P01871 | 0   | 2/2 | 0   | 0   | 0   | 0 | 0 | 0 | 0 | 1 | 0 | Secreted protein                         | Immunoglobulin.                                                                                                                                                                                                                             |
| 416 | Integrin alpha-V                                                                                    | P06756 | 0   | 0   | 3/3 | 0   | 0   | 0 | 0 | 0 | 0 | 1 | 0 | Membrane                                 | Alpha-V integrins are receptors for vitronectin, cytactin, fibronectin, fibrinogen, laminin, matrix metalloproteinase-2, osteopontin, osteomodulin, prothrombin, thrombospondin and vWF. Recognizes R-G-D sequence in a variety of ligands. |
| 417 | Integrin alpha-X                                                                                    | P20702 | 0   | 0   | 2/2 | 0   | 0   | 0 | 0 | 0 | 0 | 1 | 0 | Membrane                                 | Receptor for fibrinogen.                                                                                                                                                                                                                    |
| 418 | Lamin-A/C                                                                                           | P02545 | 0   | 0   | 2/2 | 0   | 0   | 0 | 0 | 0 | 0 | 1 | 0 | Nucleus                                  | Component of the nuclear lamina.                                                                                                                                                                                                            |
| 419 | Long-chain-fatty-acid--CoA ligase 1                                                                 | P33121 | 0   | 0   | 0   | 0   | 3/3 | 0 | 0 | 0 | 0 | 1 | 0 | Mitochondrion, ER, Peroxisome            | Lipid metabolism.                                                                                                                                                                                                                           |
| 420 | Lysosomal alpha-mannosidase                                                                         | O00754 | 2/2 | 0   | 0   | 0   | 0   | 0 | 0 | 0 | 0 | 1 | 0 | Lysosome                                 | Hydrolyses terminal alpha-D-mannose residues in alpha-D-mannosides.                                                                                                                                                                         |
| 421 | Matrix metalloproteinase-9                                                                          | P14780 | 0   | 0   | 0   | 2/2 | 0   | 0 | 0 | 0 | 0 | 1 | 0 | Secreted protein                         | Proteolysis of extracellular matrix.                                                                                                                                                                                                        |
| 422 | Medium-chain specific acyl-CoA dehydrogenase, mitochondrial                                         | P11310 | 2/2 | 0   | 0   | 0   | 0   | 0 | 0 | 0 | 0 | 1 | 0 | Mitochondrion                            | Fatty acid beta-oxidation cycle.                                                                                                                                                                                                            |
| 423 | Multifunctional protein ADE2                                                                        | P22234 | 0   | 0   | 0   | 0   | 2/2 | 0 | 0 | 0 | 0 | 1 | 0 | Unknown                                  | Purine biosynthesis.                                                                                                                                                                                                                        |
| 424 | Neuroblast differentiation-associated protein AHNAK (Desmoyokin)                                    | Q09666 | 0   | 4/3 | 0   | 0   | 0   | 0 | 0 | 0 | 0 | 1 | 0 | Nucleus, Cytoplasm, Enlargeosome         | May be involved in neuronal differentiation. Colocalizes with VAMP-4 in cytoplasmic vesicles called "enlargeosomes" (Cocucci et al., 2008).                                                                                                 |
| 425 | Peptidyl-prolyl cis-trans isomerase, mitochondrial                                                  | P30405 | 2/2 | 0   | 0   | 0   | 0   | 0 | 0 | 0 | 0 | 1 | 0 | Mitochondrion                            | Protein folding.                                                                                                                                                                                                                            |
| 426 | Peroxiredoxin-6                                                                                     | P30041 | 0   | 0   | 0   | 0   | 2/2 | 0 | 0 | 0 | 0 | 1 | 0 | Cytoplasm, Lysosome, Cytoplasmic vesicle | Redox regulation, detoxification, phospholipid turnover. Can reduce H(2)O(2) and short chain organic, fatty acid, and phospholipid hydroperoxides.                                                                                          |
| 427 | Platelet factor 4                                                                                   | P02776 | 4/3 | 0   | 0   | 0   | 0   | 0 | 0 | 0 | 0 | 1 | 0 | Secreted protein                         | Chemotactic for neutrophils and monocytes. Stored in secretory granules of platelets and released during platelet aggregation and in response to protein kinase C activation.                                                               |
| 428 | Plectin-1                                                                                           | Q15149 | 0   | 0   | 0   | 0   | 2/2 | 0 | 0 | 0 | 0 | 1 | 0 | Cytoplasm, Cytoskeleton, PM              | Interlinks intermediate filaments with microtubules and microfilaments and anchors intermediate filaments to desmosomes or hemidesmosomes. May also bind muscle proteins such as actin to membrane complexes in muscle.                     |
| 429 | Probable ATP-dependent RNA helicase DHX40                                                           | Q8IX18 | 2/2 | 0   | 0   | 0   | 0   | 0 | 0 | 0 | 0 | 1 | 0 | Unknown                                  | Possible RNA helicase                                                                                                                                                                                                                       |
| 430 | Protein CASP                                                                                        | Q13948 | 0   | 0   | 0   | 0   | 2/2 | 0 | 0 | 0 | 0 | 1 | 0 | Golgi                                    | May be involved in intra-Golgi retrograde transport.                                                                                                                                                                                        |
| 431 | Protein S100-A4                                                                                     | P26447 | 0   | 0   | 0   | 2/2 | 0   | 0 | 0 | 0 | 0 | 1 | 0 | Cytoplasm, Cytoskeleton                  | Ca(2+) dependent interaction with liprin-beta1, methionine aminopeptidase, p53 tumor suppressor protein, and proteins involved in cytoskeletal rearrangement and cell motility such as F-actin, tropomyosin, and nonmuscle myosin II.       |
| 432 | Protein YIPF4                                                                                       | Q9BSR8 | 0   | 0   | 0   | 0   | 2/2 | 0 | 0 | 0 | 0 | 1 | 0 | Membrane                                 | Unknown.                                                                                                                                                                                                                                    |

|     |                                                                 |        |     |   |     |     |     |         |         |     |   |   |   |                                                                         |                                                                                                                                                                                                              |
|-----|-----------------------------------------------------------------|--------|-----|---|-----|-----|-----|---------|---------|-----|---|---|---|-------------------------------------------------------------------------|--------------------------------------------------------------------------------------------------------------------------------------------------------------------------------------------------------------|
| 433 | Pyruvate dehydrogenase E1 component subunit beta, mitochondrial | P11177 | 2/2 | 0 | 0   | 0   | 0   | 0       | 0       | 0   | 0 | 1 | 0 | Mitochondrion                                                           | Glycolysis.                                                                                                                                                                                                  |
| 434 | Ras-related protein Rab-35                                      | Q15286 | 3/3 | 0 | 0   | 0   | 0   | 0       | 0       | 0   | 0 | 1 | 0 | Endosome, PM, Melanosome                                                | Endocytic recycling. Cytokinesis.                                                                                                                                                                            |
| 435 | Receptor-type tyrosine-protein phosphatase eta                  | Q12913 | 0   | 0 | 2/2 | 0   | 0   | 0       | 0       | 0   | 0 | 1 | 0 | Membrane, PM, Nucleus                                                   | Receptor protein tyrosine phosphatase. May contribute to contact inhibition of cell growth.                                                                                                                  |
| 436 | Ribonuclease inhibitor                                          | P13489 | 0   | 0 | 0   | 2/2 | 0   | 0       | 0       | 0   | 0 | 1 | 0 | Cytoplasm                                                               | RNase inhibitor.                                                                                                                                                                                             |
| 437 | Septin-2                                                        | Q15019 | 0   | 0 | 0   | 0   | 4/4 | 0       | 0       | 0   | 0 | 1 | 0 | Cytoplasm                                                               | Associates with actin stress fibers. Colocalizes with submembrane actin. Required for phagosome formation (Huang et al., 2008).                                                                              |
| 438 | Signal transducer and activator of transcription 1-alpha/beta   | P42224 | 0   | 0 | 0   | 0   | 4/4 | 0       | 0       | 0   | 0 | 1 | 0 | Cytoplasm, Nucleus                                                      | Signal transducer in response to interferons.                                                                                                                                                                |
| 439 | Syntaxin-binding protein 2                                      | Q15833 | 0   | 0 | 2/2 | 0   | 0   | 0       | 0       | 0   | 0 | 1 | 0 | Post-Golgi vesicles                                                     | Post-Golgi transport to PM.                                                                                                                                                                                  |
| 440 | Trans-Golgi network integral membrane protein 2                 | O43493 | 0   | 0 | 0   | 0   | 2/2 | 0       | 0       | 0   | 0 | 1 | 0 | Trans-Golgi network, PM, Transport vesicle, Membrane                    | Regulates membrane traffic to and from TGN.                                                                                                                                                                  |
| 441 | Transketolase                                                   | P29401 | 0   | 0 | 0   | 0   | 2/2 | 0       | 0       | 0   | 0 | 1 | 0 | Cytosol                                                                 | Pentose phosphate pathway.                                                                                                                                                                                   |
| 442 | Transmembrane emp24 domain-containing protein 10                | P49755 | 0   | 0 | 0   | 2/2 | 0   | 0       | 0       | 0   | 0 | 1 | 0 | ER-Golgi intermediate compartment, Zymogen granule membrane, Melanosome | Vesicular protein trafficking.                                                                                                                                                                               |
| 443 | Transmembrane emp24 domain-containing protein 4                 | Q7Z7H5 | 0   | 0 | 0   | 2/2 | 0   | 0       | 0       | 0   | 0 | 1 | 0 | ER membrane                                                             | Involved in endoplasmic reticulum stress response. May play a role in the regulation of heat-shock response and apoptosis (By similarity).                                                                   |
| 444 | Triosephosphate isomerase                                       | P60174 | 0   | 0 | 0   | 0   | 3/3 | 0       | 0       | 0   | 0 | 1 | 0 | Cytoplasm                                                               | Carbohydrate metabolism. Gluconeogenesis.                                                                                                                                                                    |
| 445 | Vacuolar proton pump subunit H                                  | Q9UI12 | 3/3 | 0 | 0   | 0   | 0   | 0       | 0       | 0   | 0 | 1 | 0 | Intracellular compartments, Endosome-Lysosome                           | Compartment acidification.                                                                                                                                                                                   |
| 446 | Vasodilator-stimulated phosphoprotein                           | P50552 | 0   | 0 | 0   | 0   | 2/2 | 0       | 0       | 0   | 0 | 1 | 0 | Cytoplasm                                                               | Associates with cytoskeleton, membrane focal adhesions, and lamellipodia. Involved in remodeling of actin cytoskeleton.                                                                                      |
| 447 | Vesicular integral-membrane protein VIP36                       | Q12907 | 0   | 0 | 0   | 0   | 3/3 | 0       | 0       | 0   | 0 | 1 | 0 | ER-Golgi intermediate compartment, Golgi                                | Secretory pathway. Transport and sorting of high mannose glycans.                                                                                                                                            |
| 448 | Beta-galactosidase                                              | P16278 | 0   | 0 | 0   | 0   | 0   | [1]/[1] | [1]/[1] | 0   | 0 | 0 | 2 | Lysosome                                                                | Carbohydrate degradation.                                                                                                                                                                                    |
| 449 | Sialate O-acetyltransferase                                     | Q9HAT2 | 0   | 0 | 0   | 0   | 0   | [1]/[1] | [1]/[1] | 0   | 0 | 0 | 2 | Lysosome                                                                | Removal of O-acetyl ester groups from sialic acid, N-acetylneuraminic acid.                                                                                                                                  |
| 450 | 60S ribosomal protein L30                                       | P62888 | 0   | 0 | 0   | 0   | 0   | 2/2     | 0       | 0   | 0 | 0 | 1 | Cytoplasm                                                               | Protein synthesis.                                                                                                                                                                                           |
| 451 | Arylsulfatase B                                                 | P15848 | 0   | 0 | 0   | 0   | 0   | 2/2     | 0       | 0   | 0 | 0 | 1 | Lysosome                                                                | Hydrolyzes chondroitin sulfate and dermatan sulfate.                                                                                                                                                         |
| 452 | ATP-dependent RNA helicase DDX3X                                | O00571 | 0   | 0 | 0   | 0   | 0   | 0       | 2/2     | 0   | 0 | 0 | 1 | Nucleus, Cytoplasm                                                      | ATP-dependent RNA helicase.                                                                                                                                                                                  |
| 453 | C-1-tetrahydrofolate synthase, cytoplasmic                      | P11586 | 0   | 0 | 0   | 0   | 0   | 0       | 0       | 2/2 | 0 | 0 | 1 | Cytoplasm                                                               | Metabolism. Tetrahydrofolate pathway.                                                                                                                                                                        |
| 454 | C-C motif chemokine 20                                          | P78556 | 0   | 0 | 0   | 0   | 0   | 0       | 2/2     | 0   | 0 | 0 | 1 | Monocyte secreted protein                                               | Chemotactic factor that attracts lymphocytes and, slightly, neutrophils, but not monocytes. Possesses antibacterial activity.                                                                                |
| 455 | Cell division control protein 42 homolog                        | P60953 | 0   | 0 | 0   | 0   | 0   | 0       | 2/2     | 0   | 0 | 0 | 1 | PM                                                                      | Rho family small GTPase. Cellular response regulator. Actin cytoskeleton organization.                                                                                                                       |
| 456 | Complement C3                                                   | P01024 | 0   | 0 | 0   | 0   | 0   | 5/4     | 0       | 0   | 0 | 0 | 1 | Secreted protein                                                        | Complement pathway.                                                                                                                                                                                          |
| 457 | COX assembly mitochondrial protein homolog                      | Q7Z7K0 | 0   | 0 | 0   | 0   | 0   | 2/2     | 0       | 0   | 0 | 0 | 1 | Mitochondrion                                                           | Required for mitochondrial cytochrome c oxidase (COX) assembly and respiration. May be involved in copper trafficking and distribution to COX and SOD1 (By similarity).                                      |
| 458 | Developmentally-regulated GTP-binding protein 1                 | Q9Y295 | 0   | 0 | 0   | 0   | 0   | 0       | 2/2     | 0   | 0 | 0 | 1 | Cytoplasm, Cytoskeleton                                                 | May play a role in cell proliferation, differentiation and death.                                                                                                                                            |
| 459 | Epithelial cadherin                                             | P12830 | 0   | 0 | 0   | 0   | 0   | 2/2     | 0       | 0   | 0 | 0 | 1 | PM, Cell junction                                                       | Cell adhesion. Cytoplasmic domain interacts directly with CTNNA1 or JUP to form the PSEN1/cadherin/catenin adhesion complex which connects to the actin skeleton through the actin binding of alpha-catenin. |
| 460 | Glucose-6-phosphate isomerase                                   | P06744 | 0   | 0 | 0   | 0   | 0   | 0       | 0       | 3/3 | 0 | 0 | 1 | Cytoplasm                                                               | Gluconeogenesis. Glycolysis.                                                                                                                                                                                 |
| 461 | Guanine nucleotide-binding protein subunit beta-4               | Q9HAV0 | 0   | 0 | 0   | 0   | 0   | 0       | 2/2     | 0   | 0 | 0 | 1 | Membrane                                                                | Modulator or transducer in transmembrane signaling systems.                                                                                                                                                  |
| 462 | Hsc70-interacting protein                                       | P50502 | 0   | 0 | 0   | 0   | 0   | 0       | 0       | 3/3 | 0 | 0 | 1 | Cytoplasm                                                               | Stabilizes ADP state of HSC70 that has a high affinity for substrate protein. Through its own chaperone activity, it may contribute to the interaction of HSC70 with various target proteins.                |
| 463 | Ig alpha-1 chain C region                                       | P01876 | 0   | 0 | 0   | 0   | 0   | 0       | 0       | 3/3 | 0 | 0 | 1 | Secreted protein                                                        | Immunoglobulin.                                                                                                                                                                                              |

|     |                                                      |        |   |   |   |   |   |     |     |     |   |   |                                      |                                                                                                                                                          |
|-----|------------------------------------------------------|--------|---|---|---|---|---|-----|-----|-----|---|---|--------------------------------------|----------------------------------------------------------------------------------------------------------------------------------------------------------|
| 464 | Leucine-rich repeat flightless-interacting protein 1 | Q32MZ4 | 0 | 0 | 0 | 0 | 0 | 0   | 0   | 2/2 | 0 | 1 | Nucleus, Cytoplasm, Cytoskeleton     | Transcriptional repressor.                                                                                                                               |
| 465 | Nuclear protein Hcc-1                                | P82979 | 0 | 0 | 0 | 0 | 0 | 0   | 3/3 | 0   | 0 | 1 | Nucleus                              | May have nucleic acid binding capability that may participate in transcriptional or translational control of cell growth, metabolism and carcinogenesis. |
| 466 | Peroxiredoxin-2                                      | P32119 | 0 | 0 | 0 | 0 | 0 | 0   | 0   | 3/2 | 0 | 1 | Cytoplasm                            | Redox regulation, detoxification.                                                                                                                        |
| 467 | Peroxiredoxin-5, mitochondrial                       | P30044 | 0 | 0 | 0 | 0 | 0 | 0   | 0   | 2/2 | 0 | 1 | Mitochondrion, Cytoplasm, Peroxisome | Reduces hydrogen peroxide and alkyl hydroperoxides. Involved in intracellular redox signaling.                                                           |
| 468 | Polyadenylate-binding protein 4                      | Q13310 | 0 | 0 | 0 | 0 | 0 | 0   | 0   | 2/2 | 0 | 1 | Cytoplasm                            | mRNA stability.                                                                                                                                          |
| 469 | Putative neutrophil cytosol factor 1B                | A6NI72 | 0 | 0 | 0 | 0 | 0 | 3/3 | 0   | 0   | 0 | 1 | Cytoplasm                            | May be required for activation of the latent NADPH oxidase (necessary for superoxide production) (By similarity).                                        |
| 470 | Putative tropomyosin alpha-3 chain-like protein      | A6NL28 | 0 | 0 | 0 | 0 | 0 | 0   | 0   | 2/2 | 0 | 1 | Cytoplasm, Cytoskeleton              | Binds to actin filaments in muscle and non-muscle cells (By similarity).                                                                                 |
| 471 | Ras-related C3 botulinum toxin substrate 2           | P15153 | 0 | 0 | 0 | 0 | 0 | 0   | 2/2 | 0   | 0 | 1 | Membrane                             | Cellular response regulator.                                                                                                                             |
| 472 | Ras-related protein Rap-2b                           | P61225 | 0 | 0 | 0 | 0 | 0 | 2/2 | 0   | 0   | 0 | 1 | Membrane                             | Small GTPase mediated signal transduction.                                                                                                               |
| 473 | Serum amyloid P-component                            | P02743 | 0 | 0 | 0 | 0 | 0 | 3/3 | 0   | 0   | 0 | 1 | Secreted protein                     | May scavenge nuclear material released from damaged circulating cells. May also function as a calcium-dependent lectin.                                  |
| 474 | Sorting nexin-6                                      | Q9UNH7 | 0 | 0 | 0 | 0 | 0 | 0   | 0   | 2/2 | 0 | 1 | Cytoplasm                            | Intracellular trafficking.                                                                                                                               |
| 475 | Tropomyosin alpha-4 chain                            | P67936 | 0 | 0 | 0 | 0 | 0 | 0   | 0   | 4/4 | 0 | 1 | Cytoplasm                            | Cytoskeleton. Binds actin filaments.                                                                                                                     |
| 476 | U2 small nuclear ribonucleoprotein B"                | P08579 | 0 | 0 | 0 | 0 | 0 | 0   | 2/2 | 0   | 0 | 1 | Nucleus                              | Pre-mRNA splicing.                                                                                                                                       |

The number of distinct proteolytic peptides (in some cases in parenthesis the number of observed redundant peptide sequences) is shown for protein observed in each experiment with multiple peptide assignments per protein  
 "[1]": protein identified in this preparation by a single peptide assignment

\* Single peptide assignments that map to more than one protein sequence:

Protein #25. Ras-related protein Rab-11B (Q15907): single peptide assignments indicated as [1] could possibly also be assigned to:  
 RB11A\_HUMAN Ras-related protein Rab-11A (Rab-11) (P62491)

Protein #48. ADP-ribosylation factor-like protein 8B (Q9NVJ2): single peptide assignments indicated as [1] could possibly also be assigned to:  
 ARL8A\_HUMAN ADP-ribosylation factor-like protein 8A (Q96BM9)

Protein #65. Interferon-induced transmembrane protein 3 (Q01628): single peptide assignments indicated as [1] could possibly also be:  
 IFM1\_HUMAN Interferon-induced transmembrane protein 1 (P13164) or  
 IFM2\_HUMAN Interferon-induced transmembrane protein 2 (Q01629)

Protein #102. Ras-related protein Rap-1b (P61224): single peptide assignments indicated as [1] could possibly also be assigned to:  
 RAP1A\_HUMAN Ras-related protein Rap-1A precursor (P62834)

Protein #112. Galectin-9B (Q3B8N2): single peptide assignments indicated as [1] could possibly also be assigned to:  
 LEG9C\_HUMAN Galectin-9C (Galectin-9-like protein B) (Q6DKI2)

Protein #177. Ras-related protein Ral-B (P11234): single peptide assignments indicated as [1] could possibly also be assigned to:  
 RALA\_HUMAN Ras-related protein Ral-A precursor (P11233)

Protein #218. Stathmin (P16949): single peptide assignments indicated as [1] could possibly also be assigned to:  
 STMN2\_HUMAN Stathmin-2 (Q93045)

(\*) For correlation of spectral counts to the relative protein concentration see Liu et al. [Liu, H., Sadygov, R. G., and Yates, J. R., III (2004) Anal. Chem. 76, 4193–4201].

\*\* Proteins identified exclusively by single peptide assignments in each of the phagosomal preparations are indicated in blue font

Except where indicated by referenced citation, "Reported location" and "Physiological function" are abstracted from the Swiss-Prot database.

## REFERENCES

- Arnold, H., and Pette, D. (1970) Binding of aldolase and triosephosphate dehydrogenase to F-actin and modification of catalytic properties of aldolase. *Eur J Biochem* **15**, 360-366
- Bae, T. J., Kim, M. S., Kim, J. W., Kim, B. W., Choo, H. J., Lee, J. W., Kim, K. B., Lee, C. S., Kim, J. H., Chang, S. Y., Kang, C. Y., Lee, S. W., and Ko, Y. G. (2004) Lipid raft proteome reveals ATP synthase complex in the cell surface. *Proteomics* **4**, 3536-3548
- Baranova, I. N., Kurlander, R., Bocharov, A. V., Vishnyakova, T. G., Chen, Z., Remaley, A. T., Csako, G., Patterson, A. P., and Eggerman, T. L. (2008) Role of human CD36 in bacterial recognition, phagocytosis, and pathogen-induced JNK-mediated signaling. *J Immunol* **181**, 7147-7156
- Brudzynski, K., Martinez, V., and Gupta, R. S. (1992) Immunocytochemical localization of heat-shock protein 60-related protein in beta-cell secretory granules and its altered distribution in non-obese diabetic mice. *Diabetologia* **35**, 316-324
- Brudzynski, K., Martinez, V., and Gupta, R. S. (1992) Secretory granule autoantigen in insulin-dependent diabetes mellitus is related to 62 kDa heat-shock protein (hsp60). *J Autoimmun* **5**, 453-463

- Buettner, R., Papoutsoglou, G., Scemes, E., Spray, D. C., and Dermietzel, R. (2000) Evidence for secretory pathway localization of a voltage-dependent anion channel isoform. *Proc Natl Acad Sci U S A* **97**, 3201-3206.
- Cechetto, J. D., Soltys, B. J., and Gupta, R. S. (2000) Localization of mitochondrial 60-kD heat shock chaperonin protein (Hsp60) in pituitary growth hormone secretory granules and pancreatic zymogen granules. *J Histochem Cytochem* **48**, 45-56
- Cocucci, E., Racchetti, G., Rupnik, M., and Meldolesi, J. (2008) The regulated exocytosis of enlargeosomes is mediated by a SNARE machinery that includes VAMP4. *J Cell Sci* **121**, 2983-2991
- Conrads, T. P., Tocci, G. M., Hood, B. L., Zhang, C. O., Guo, L., Koch, K. R., Michejda, C. J., Veenstra, T. D., and Keay, S. K. (2006) CKAP4/p63 is a receptor for the frizzled-8 protein-related antiproliferative factor from interstitial cystitis patients. *J Biol Chem* **281**, 37836-37843
- Das, S., Laxminarayana, S. V., Chandra, N., Ravi, V., and Desai, A. (2008) Heat shock protein 70 on Neuro2a cells is a putative receptor for Japanese encephalitis virus. *Virology*
- Furuhashi, M., Fucho, R., Gorgun, C. Z., Tuncman, G., Cao, H., and Hotamisligil, G. S. (2008) Adipocyte/macrophage fatty acid-binding proteins contribute to metabolic deterioration through actions in both macrophages and adipocytes in mice. *J Clin Invest* **118**, 2640-2650
- Garrett, S. C., Varney, K. M., Weber, D. J., and Bresnick, A. R. (2006) S100A4, a mediator of metastasis. **181**, 7147-7156
- Haglund, K., and Dikic, I. (2005) Ubiquitylation and cell signaling. *EMBO J* **24**, 3353-3359
- Huang, Y. W., Yan, M., Collins, R. F., Diccicco, J. E., Grinstein, S., and Trimble, W. S. (2008) Mammalian septins are required for phagosome formation. *Mol Biol Cell* **19**, 1717-1726
- Isola, L. M., Zhou, S. L., Kiang, C. L., Stump, D. D., Bradbury, M. W., and Berk, P. D. (1995) 3T3 fibroblasts transfected with a cDNA for mitochondrial aspartate aminotransferase express plasma membrane fatty acid-binding protein and saturable fatty acid uptake. *Proc Natl Acad Sci U S A* **92**, 9866-9870
- Kindzelskii, A. L., Ueki, T., Michibata, H., Chaiworapongsa, T., Romero, R., and Petty, H. R. (2004) 6-phosphogluconate dehydrogenase and glucose-6-phosphate dehydrogenase form a supramolecular complex in human neutrophils that undergoes retrograde trafficking during pregnancy. *J Immunol* **172**, 6373-6381
- Kirchhof, M. G., Chau, L. A., Lemke, C. D., Vardhana, S., Darlington, P. J., Marquez, M. E., Taylor, R., Rizkalla, K., Blanca, I., Dustin, M. L., and Madrenas, J. (2008) Modulation of T cell activation by stomatin-like protein 2. *J Immunol* **181**, 1927-1936
- Lee, T. H., Streb, J. W., Georger, M. A., and Miano, J. M. (2006) Tissue expression of the novel serine carboxypeptidase Scep1. *J Histochem Cytochem* **54**, 701-711
- Liu, L., Yang, C., Yuan, J., Chen, X., Xu, J., Wei, Y., Yang, J., Lin, G., and Yu, L. (2005) RPK118, a PX domain-containing protein, interacts with peroxiredoxin-3 through pseudo-kinase domains. *Mol Cells* **19**, 39-44
- Mishra, S., Murphy, L. C., and Murphy, L. J. (2006) The Prohibitins: emerging roles in diverse functions. *J Cell Mol Med* **10**, 353-363
- Nelson, J., McFerran, N. V., Pivato, G., Chambers, E., Doherty, C., Steele, D., and Timson, D. J. (2008) The 67 kDa laminin receptor: structure, function and role in disease. *Biosci Rep* **28**, 33-48
- Park, M., Lin, L., Thomas, S., Braymer, H. D., Smith, P. M., Harrison, D. H., and York, D. A. (2004) The F1-ATPase beta-subunit is the putative enterostatin receptor. *Peptides* **25**, 2127-2133
- Sadacharan, S. K., Cavanagh, A. C., and Gupta, R. S. (2001) Immunoelectron microscopy provides evidence for the presence of mitochondrial heat shock 10-kDa protein (chaperonin 10) in red blood cells and a variety of secretory granules. *Histochem Cell Biol* **116**, 507-517
- Schindler, R., Weichselsdorfer, E., Wagner, O., and Bereiter-Hahn, J. (2001) Aldolase-localization in cultured cells: cell-type and substrate-specific regulation of cytoskeletal associations. *Biochem Cell Biol* **79**, 719-726
- Shakibaei, M., Zimmermann, B., and Scheller, M. (1993) Endocytosis of integrin alpha 5 beta 1 (fibronectin receptor) of mouse peritoneal macrophages in vitro: an immunoelectron microscopic study. *J Struct Biol* **111**, 180-189
- Sirover, M. A. (1999) New insights into an old protein: the functional diversity of mammalian glyceraldehyde-3-phosphate dehydrogenase. *Biochim Biophys Acta* **1432**, 159-184
- van der Goot, F. G., and Gruenberg, J. (2006) Intra-endosomal membrane traffic. *Trends Cell Biol* **16**, 514-521
- Zhao, X. Q., Naka, M., Muneyuki, M., and Tanaka, T. (2000) Ca(2+)-dependent inhibition of actin-activated myosin ATPase activity by S100C (S100A11), a novel member of the S100 protein family. *Biochem Biophys Res Commun* **267**, 77-79
- Zhou, S. L., Stump, D., Kiang, C. L., Isola, L. M., and Berk, P. D. (1995) Mitochondrial aspartate aminotransferase expressed on the surface of 3T3-L1 adipocytes mediates saturable fatty acid uptake. *Proc Soc Exp Biol Med* **208**, 263-270

**Supplemental Table 2.** Proteins Identified by HPLC-MS/MS separated on a 1-D SDS PAGE Gel of BCG phagosome from Mouse J774 Macrophage, 1-day post-infection.\*

ESI-MS/MS raw data obtained on a QSTAR Pulsar i instrument and Mascot search results for trypsin digestion of proteins separated on a 1D-SDS PAGE gel.

| accession # | coverage | score | distinct peptides | mass   | pI  | start AA                                                                                                       | end AA | m/z obs | M obs   | M calc  | delta | miss | pept score | exp val   | peptide                | modifications | retent time | Strongest Band | # gel bands found |
|-------------|----------|-------|-------------------|--------|-----|----------------------------------------------------------------------------------------------------------------|--------|---------|---------|---------|-------|------|------------|-----------|------------------------|---------------|-------------|----------------|-------------------|
| P05555      | 3%       | 122   | 3                 | 128541 | 6.9 | P05555 ITAM_MOUSE Integrin alpha-M OS=Mus musculus GN=Itgam PE=1 SV=2                                          |        |         |         |         |       |      |            |           |                        |               | 19.57       | 1              | 1                 |
|             |          |       |                   |        |     | 252                                                                                                            | 261    | 543.73  | 1085.45 | 1085.63 | -0.18 | 0    | 45         | 0.0019876 | K.ILVVITDGEK.F         |               |             |                |                   |
|             |          |       |                   |        |     | 416                                                                                                            | 425    | 520.24  | 1038.46 | 1038.62 | -0.15 | 0    | 43         | 0.0023791 | R.VQSLVVGAPR.Y         |               |             |                |                   |
|             |          |       |                   |        |     | 634                                                                                                            | 644    | 654.74  | 1307.46 | 1307.65 | -0.19 | 0    | 35         | 0.0170556 | R.SVFACQEQVLK.N        |               |             |                |                   |
| P08113      | 4%       | 143   | 3                 | 92703  | 4.7 | P08113 ENPL_MOUSE Endoplasmic OS=Mus musculus GN=Hsp90b1 PE=1 SV=2                                             |        |         |         |         |       |      |            |           |                        |               | 19.34       | 2              | 1                 |
|             |          |       |                   |        |     | 76                                                                                                             | 84     | 541.21  | 1080.4  | 1080.54 | -0.13 | 0    | 52         | 0.0003168 | K.FAFQAEVNR.M          |               |             |                |                   |
|             |          |       |                   |        |     | 103                                                                                                            | 114    | 638.24  | 1274.46 | 1274.64 | -0.17 | 0    | 47         | 0.0009991 | R.ELISNASDALDK.I       |               |             |                |                   |
|             |          |       |                   |        |     | 169                                                                                                            | 177    | 491.69  | 981.36  | 981.48  | -0.12 | 0    | 45         | 0.0013053 | K.SGTSEFLNK.M          |               |             |                |                   |
| P26041      | 7%       | 225   | 4                 | 67839  | 6.2 | P26041 MOES_MOUSE Moesin OS=Mus musculus GN=Msn PE=1 SV=3                                                      |        |         |         |         |       |      |            |           |                        |               | 12.95       | 3              | 2                 |
|             |          |       |                   |        |     | 144                                                                                                            | 151    | 405.62  | 809.23  | 809.39  | -0.16 | 0    | 34         | 0.0110695 | K.SGYLAGDK.L           |               |             |                |                   |
|             |          |       |                   |        |     | 413                                                                                                            | 427    | 847.3   | 1692.58 | 1692.8  | -0.22 | 0    | 36         | 0.0108905 | K.TQEQLASEMAELTAR.I    |               |             |                |                   |
|             |          |       |                   |        |     | 428                                                                                                            | 435    | 482.19  | 962.37  | 962.49  | -0.11 | 0    | 39         | 0.0072    | R.ISQLEMAR.K           |               |             |                |                   |
| P20029      | 5%       | 204   | 3                 | 72492  | 5.1 | P20029 GRP78_MOUSE 78 kDa glucose-regulated protein OS=Mus musculus GN=Hspa5 PE=1 SV=3                         |        |         |         |         |       |      |            |           |                        |               | 13.92       | 3              | 2                 |
|             |          |       |                   |        |     | 51                                                                                                             | 61     | 614.73  | 1227.45 | 1227.62 | -0.17 | 0    | 69         | 6.65E-06  | R.VEIIANDQGNR.I        |               |             |                |                   |
|             |          |       |                   |        |     | 83                                                                                                             | 97     | 839.31  | 1676.6  | 1676.8  | -0.2  | 0    | 42         | 0.002846  | K.NQLTSPNPENTVFDAR.R   |               |             |                |                   |
|             |          |       |                   |        |     | 525                                                                                                            | 533    | 537.71  | 1073.41 | 1073.55 | -0.14 | 0    | 61         | 4.50E-05  | K.IITITNDQNR.L         |               |             |                |                   |
| P10126      | 4%       | 109   | 2                 | 50424  | 9.1 | P10126 EF1A1_MOUSE Elongation factor 1-alpha 1 OS=Mus musculus GN=Eef1a1 PE=1 SV=3                             |        |         |         |         |       |      |            |           |                        |               | 18.56       | 5              | 1                 |
|             |          |       |                   |        |     | 256                                                                                                            | 266    | 513.25  | 1024.48 | 1024.6  | -0.13 | 0    | 50         | 0.0005008 | K.IGGIGTVPVGR.V        |               |             |                |                   |
|             |          |       |                   |        |     | 431                                                                                                            | 439    | 457.7   | 913.38  | 913.56  | -0.18 | 0    | 59         | 8.00E-05  | R.QTVAVGVK.A           |               |             |                |                   |
| P60710      | 10%      | 160   | 3                 | 42052  | 5.3 | P60710 ACTB_MOUSE Actin, cytoplasmic 1 OS=Mus musculus GN=Actb PE=1 SV=1                                       |        |         |         |         |       |      |            |           |                        |               | 13.14       | 6              | 1                 |
|             |          |       |                   |        |     | 19                                                                                                             | 28     | 488.66  | 975.31  | 975.44  | -0.13 | 0    | 73         | 2.83E-06  | K.AGFAGDDAPR.A         |               |             |                |                   |
|             |          |       |                   |        |     | 96                                                                                                             | 113    | 651.94  | 1952.8  | 1953.06 | -0.26 | 0    | 41         | 0.003268  | R.VAPEEHPVLLTEAPLNPK.A |               |             |                |                   |
|             |          |       |                   |        |     | 316                                                                                                            | 326    | 589.19  | 1176.37 | 1176.61 | -0.24 | 0    | 46         | 0.0011395 | K.EITALAPSTMK.I        |               |             |                |                   |
| P08752      | 9%       | 185   | 3                 | 41015  | 5.3 | P08752 GNAI2_MOUSE Guanine nucleotide-binding protein G(i), alpha-2 subunit OS=Mus musculus GN=Gnai2 PE=1 SV=4 |        |         |         |         |       |      |            |           |                        |               | 19.72       | 7              | 2                 |
|             |          |       |                   |        |     | 36                                                                                                             | 46     | 529.24  | 1056.46 | 1056.62 | -0.16 | 0    | 48         | 0.0010277 | K.LLLLGGAGESGK.S       |               |             |                |                   |
|             |          |       |                   |        |     | 87                                                                                                             | 100    | 796.27  | 1590.53 | 1590.75 | -0.22 | 0    | 66         | 1.22E-05  | K.AMGNLQIDFADPQR.A     |               |             |                |                   |
|             |          |       |                   |        |     | 199                                                                                                            | 206    | 463.14  | 924.27  | 924.41  | -0.14 | 0    | 37         | 0.0055751 | K.MFDVGGQR.S           |               |             |                |                   |

**\*Footnotes to Supplemental Table 2:**

Data sets were searched with the Mascot search engine (see Perkins et al. (1999) *Electrophoresis* **20**, 3551-3567).

Detailed are the SwissProt accession number, the number of distinct proteolytic peptides and the sequence coverage of the protein (%).

Listed is the Mascot protein score as well as the score and expectation value for the individual peptides.

Additional columns indicate the position of the protein in the 1D-SDS PAGE gel (Strongest Band in which the protein was identified, and the total # of gel bands in which the protein was identified.)

**Supplemental Table 3.** Proteins Identified by HPLC-MS/MS separated on a 2-D SDS PAGE gel of BCG phagosome isolated from mouse J774 macrophages 1 day post-infection.\*

ESI-MS/MS raw data obtained on a QSTAR Pulsar i instrument and Mascot search results for trypsin digestion of proteins separated on a 2D-SDS PAGE gel.

| accession #                        | coverage | score | distinct peptides | mass  | pl  | start AA           | end AA                                    | m/z obs                              | M obs           | M calc   | delta   | miss                                 | pept score | exp val   | peptide        | modifications | retent time      | Gel Spot      |       |           |                    |                     |               |       |
|------------------------------------|----------|-------|-------------------|-------|-----|--------------------|-------------------------------------------|--------------------------------------|-----------------|----------|---------|--------------------------------------|------------|-----------|----------------|---------------|------------------|---------------|-------|-----------|--------------------|---------------------|---------------|-------|
| P08113                             | 2%       | 155   | 2                 | 92703 | 4.7 | P08113 ENPL_MOUSE  |                                           | 491.69                               | 981.36          | 981.48   | -0.12   | 0                                    | 52         | 0.0002539 | K.SGTSEFLNK.M  |               | 19.89            | 1             |       |           |                    |                     |               |       |
|                                    |          |       |                   |       |     |                    |                                           | 725                                  | 733             | 497.2    | 992.38  | 992.52                               | -0.14      | 0         | 40             | 0.0058666     | R.SGYLLPDTK.A    |               | 23.92 |           |                    |                     |               |       |
|                                    |          |       |                   |       |     |                    |                                           | OS=Mus musculus GN=Hsp90b1 PE=1 SV=2 |                 |          |         |                                      |            |           |                |               |                  |               |       |           |                    |                     |               |       |
| P35564                             | 5%       | 143   | 3                 | 67635 | 4.5 | P35564 CALX_MOUSE  |                                           | 493.67                               | 985.33          | 985.47   | -0.14   | 0                                    | 57         | 0.0001159 | K.SDASTPPSPK.V |               | 14.73            | 2             |       |           |                    |                     |               |       |
|                                    |          |       |                   |       |     |                    |                                           | 172                                  | 183             | 468.49   | 1402.46 | 1402.67                              | -0.22      | 0         | 55             | 0.0001681     | K.TAELSLDQFHDK.T |               | 23.8  |           |                    |                     |               |       |
|                                    |          |       |                   |       |     |                    |                                           | 518                                  | 526             | 485.67   | 969.32  | 969.48                               | -0.15      | 0         | 35             | 0.0138969     | K.TDAPQPDVK.D    |               | 15.28 |           |                    |                     |               |       |
| OS=Mus musculus GN=Canx PE=1 SV=1  |          |       |                   |       |     |                    |                                           |                                      |                 |          |         |                                      |            |           |                |               |                  |               |       |           |                    |                     |               |       |
| P31996                             | 6%       | 74    | 2                 | 35309 | 9.1 | P31996 CD68_MOUSE  |                                           | 508.71                               | 1015.41         | 1015.58  | -0.17   | 0                                    | 38         | 0.0105789 | R.ILYPIQGGR.K  |               | 23.55            | 2             |       |           |                    |                     |               |       |
|                                    |          |       |                   |       |     |                    |                                           | 269                                  | 277             | 492.2    | 982.39  | 982.54                               | -0.16      | 0         | 36             | 0.0121194     | R.LQAAQLPDK.G    |               | 17.39 |           |                    |                     |               |       |
|                                    |          |       |                   |       |     |                    |                                           | OS=Mus musculus GN=Cd68 PE=2 SV=1    |                 |          |         |                                      |            |           |                |               |                  |               |       |           |                    |                     |               |       |
| P26041                             | 5%       | 137   | 3                 | 67839 | 6.2 | P26041 MOES_MOUSE  |                                           | 401                                  | 408             | 444.17   | 886.33  | 886.49                               | -0.16      | 0         | 41             | 0.0062448     | K.EALLQASR.D     |               | 18.61 |           |                    |                     |               |       |
|                                    |          |       |                   |       |     |                    |                                           | 428                                  | 435             | 482.14   | 962.26  | 962.49                               | -0.22      | 0         | 50             | 0.0002921     | R.ISQLEMAR.K     | Oxidation (M) | 16.32 |           |                    |                     |               |       |
|                                    |          |       |                   |       |     |                    |                                           | 449                                  | 458             | 603.66   | 1205.3  | 1205.56                              | -0.26      | 0         | 46             | 0.0005636     | K.AQMVEDLEK.T    | Oxidation (M) | 16.82 |           |                    |                     |               |       |
| OS=Mus musculus GN=Msn PE=1 SV=3   |          |       |                   |       |     |                    |                                           |                                      |                 |          |         |                                      |            |           |                |               |                  |               |       |           |                    |                     |               |       |
| P20029                             | 15%      | 580   | 10                | 72492 | 5.1 | P20029 GRP78_MOUSE | 78 kDa                                    | glucose-regulated protein            | OS=Mus musculus | GN=Hspa5 | PE=1    | SV=3                                 | 51         | 61        | 614.7          | 1227.38       | 1227.62          | -0.24         | 0     | 70        | 4.34E-06           | R.VEIIANDQGNR.I     |               | 18.36 |
|                                    |          |       |                   |       |     |                    |                                           |                                      |                 |          |         |                                      | 83         | 97        | 839.26         | 1676.51       | 1676.8           | -0.29         | 0     | 76        | 1.05E-06           | K.NQLTSNPENTVFDK.R  |               | 24.06 |
|                                    |          |       |                   |       |     |                    |                                           |                                      |                 |          |         |                                      | 187        | 198       | 617.2          | 1232.39       | 1232.62          | -0.22         | 0     | 66        | 1.36E-05           | K.DAGTIAGLNVMR.I    | Oxidation (M) | 23.98 |
|                                    |          |       |                   |       |     |                    |                                           |                                      |                 |          |         |                                      | 346        | 353       | 459.8          | 917.59        | 917.47           | 0.11          | 0     | 42        | 0.0038346          | K.VLEDSDLK.K        |               | 19.16 |
|                                    |          |       |                   |       |     |                    |                                           |                                      |                 |          |         |                                      | 346        | 354       | 523.69         | 1045.37       | 1045.57          | -0.19         | 1     | 48        | 0.0009637          | K.VLEDSDLKK.S       |               | 16    |
|                                    |          |       |                   |       |     |                    |                                           |                                      |                 |          |         |                                      | 354        | 368       | 530.19         | 1587.54       | 1587.85          | -0.31         | 1     | 40        | 0.0058173          | K.KSDIDEIVLVGGSTR.I |               | 24.75 |
|                                    |          |       |                   |       |     |                    |                                           |                                      |                 |          |         |                                      | 372        | 377       | 364.67         | 727.32        | 727.46           | -0.14         | 0     | 37        | 0.0104021          | K.IQQLVK.E          |               | 16.77 |
|                                    |          |       |                   |       |     |                    |                                           |                                      |                 |          |         |                                      | 525        | 533       | 537.69         | 1073.37       | 1073.55          | -0.17         | 0     | 63        | 3.28E-05           | K.ITITNDQNR.L       |               | 16.39 |
|                                    |          |       |                   |       |     |                    |                                           |                                      |                 |          |         |                                      | 534        | 541       | 493.8          | 985.59        | 985.51           | 0.08          | 0     | 40        | 0.0065388          | R.LTPEEIER.M        |               | 21.11 |
|                                    |          |       |                   |       |     |                    |                                           |                                      |                 |          |         |                                      | 623        | 634       | 699.27         | 1396.53       | 1396.78          | -0.25         | 0     | 38        | 0.0083054          | K.ELEEIVQPIISK.L    |               | 25.75 |
| OS=Mus musculus GN=Hspa8 PE=1 SV=1 |          |       |                   |       |     |                    |                                           |                                      |                 |          |         |                                      |            |           |                |               |                  |               |       |           |                    |                     |               |       |
| P63017                             | 14%      | 542   | 9                 | 71055 | 5.4 | P63017 HSP7C_MOUSE | Heat shock cognate 71 kDa protein         | OS=Mus musculus                      | GN=Hspa8        | PE=1     | SV=1    | 26                                   | 36         | 614.7     | 1227.39        | 1227.62       | -0.23            | 0             | 62    | 3.07E-05  | K.VEIIANDQGNR.T    |                     | 18.4          |       |
|                                    |          |       |                   |       |     |                    |                                           |                                      |                 |          |         | 57                                   | 71         | 833.23    | 1664.45        | 1664.78       | -0.33            | 0             | 84    | 1.21E-07  | K.NQVAMNPTNTVFDK.R | Oxidation (M)       | 23.1          |       |
|                                    |          |       |                   |       |     |                    |                                           |                                      |                 |          |         | 129                                  | 137        | 497.2     | 992.39         | 992.52        | -0.13            | 0             | 38    | 0.0095933 | K.EIAEAYLGK.T      |                     | 23.3          |       |
|                                    |          |       |                   |       |     |                    |                                           |                                      |                 |          |         | 160                                  | 171        | 600.22    | 1198.43        | 1198.67       | -0.23            | 0             | 41    | 0.0050851 | K.DAGTIAGLNVL.R.I  |                     | 25.71         |       |
|                                    |          |       |                   |       |     |                    |                                           |                                      |                 |          |         | 312                                  | 319        | 429.65    | 857.28         | 857.45        | -0.17            | 0             | 42    | 0.0030528 | R.GTLDPVEK.A       |                     | 17.16         |       |
|                                    |          |       |                   |       |     |                    |                                           |                                      |                 |          |         | 349                                  | 357        | 541.2     | 1080.38        | 1080.56       | -0.18            | 0             | 57    | 0.0001023 | K.LLQDFFNGK.E      |                     | 25.95         |       |
|                                    |          |       |                   |       |     |                    |                                           |                                      |                 |          |         | 459                                  | 469        | 599.22    | 1196.42        | 1196.66       | -0.23            | 0             | 35    | 0.0158424 | K.FELTGIPPAPR.G    |                     | 25            |       |
|                                    |          |       |                   |       |     |                    |                                           |                                      |                 |          |         | 501                                  | 507        | 402.64    | 803.27         | 803.44        | -0.17            | 0             | 39    | 0.0079294 | K.ITITNDK.G        |                     | 16.03         |       |
|                                    |          |       |                   |       |     |                    |                                           |                                      |                 |          |         | 510                                  | 517        | 495.17    | 988.33         | 988.52        | -0.19            | 1             | 53    | 0.0003001 | R.LSKEDIER.M       |                     | 15.8          |       |
|                                    |          |       |                   |       |     |                    |                                           |                                      |                 |          |         | OS=Mus musculus GN=Atp6v1a PE=1 SV=2 |            |           |                |               |                  |               |       |           |                    |                     |               |       |
| P50516                             | 7%       | 186   | 4                 | 68625 | 5.4 | P50516 VATA_MOUSE  | Vacuolar ATP synthase catalytic subunit A | OS=Mus musculus                      | GN=Atp6v1a      | PE=1     | SV=2    | 121                                  | 129        | 451.66    | 901.31         | 901.5         | -0.18            | 0             | 50    | 0.0006435 | R.GVNVSALSR.D      |                     | 20.72         |       |
|                                    |          |       |                   |       |     |                    |                                           |                                      |                 |          |         | 257                                  | 265        | 481.69    | 961.36         | 961.54        | -0.18            | 0             | 43    | 0.0029643 | K.TVISQSLSK.Y      |                     | 18.67         |       |
|                                    |          |       |                   |       |     |                    |                                           |                                      |                 |          |         | 281                                  | 289        | 525.65    | 1049.28        | 1049.48       | -0.2             | 0             | 48    | 0.0004702 | R.GNEMSEVLR.D      | Oxidation (M)       | 16.42         |       |
|                                    |          |       |                   |       |     |                    |                                           |                                      |                 |          |         | 309                                  | 323        | 766.25    | 1530.49        | 1530.78       | -0.3             | 0             | 45    | 0.0015725 | R.TALVANTSNPVAAR.E | Oxidation (M)       | 17.95         |       |
| OS=Mus musculus GN=P4hb PE=1 SV=1  |          |       |                   |       |     |                    |                                           |                                      |                 |          |         |                                      |            |           |                |               |                  |               |       |           |                    |                     |               |       |
| P09103                             | 15%      | 461   | 8                 | 57507 | 4.8 | P09103 PDIA1_MOUSE | Protein disulfide-isomerase               | OS=Mus musculus                      | GN=P4hb         | PE=1     | SV=1    | 72                                   | 80         | 501.69    | 1001.36        | 1001.55       | -0.19            | 1             | 49    | 0.0008361 | K.LKAEGSEIR.L      |                     | 15.02         |       |
|                                    |          |       |                   |       |     |                    |                                           |                                      |                 |          |         | 198                                  | 209        | 475.51    | 1423.5         | 1423.77       | -0.28            | 1             | 35    | 0.0175043 | K.YQLDKDGVVLFK.K   |                     | 24.48         |       |
|                                    |          |       |                   |       |     |                    |                                           |                                      |                 |          |         | 203                                  | 209        | 389.16    | 776.3          | 776.44        | -0.14            | 0             | 55    | 0.0002102 | K.DGVVLFK.K        |                     | 24.56         |       |



| accession # | coverage | score | distinct peptides | mass  | pI  | start AA                                                                 | end AA | m/z obs | M obs   | M calc  | delta | miss | pept score | exp val | peptide                          | modifications | retent time | Gel Spot |
|-------------|----------|-------|-------------------|-------|-----|--------------------------------------------------------------------------|--------|---------|---------|---------|-------|------|------------|---------|----------------------------------|---------------|-------------|----------|
|             |          |       |                   |       |     | 216                                                                      | 224    | 526.35  | 1050.69 | 1050.5  | 0.19  | 0    | 51         |         | 0.0004 R.NNFEGEITK.E             |               | 20.15       |          |
|             |          |       |                   |       |     | 233                                                                      | 249    | 655.56  | 1963.67 | 1964.04 | -0.37 | 0    | 45         |         | 0.0012741 K.HNQLPLVIEFTEQTAPK.I  |               | 25.77       |          |
|             |          |       |                   |       |     | 303                                                                      | 310    | 483.69  | 965.37  | 965.56  | -0.19 | 0    | 45         |         | 0.0015807 R.ILEFFGLK.K           |               | 27.09       |          |
|             |          |       |                   |       |     | 319                                                                      | 328    | 611.71  | 1221.41 | 1221.62 | -0.2  | 0    | 52         |         | 0.0003243 R.LITLEEEMTK.Y         | Oxidation (M) | 22.89       |          |
|             |          |       |                   |       |     | 427                                                                      | 438    | 655.3   | 1308.59 | 1308.59 | 0     | 0    | 88         |         | 8.11E-08 K.MDSTANEVEAVK.V        | Oxidation (M) | 17.01       |          |
| P14211      | 12%      | 289   | 6                 | 48136 | 4.3 | P14211 CALR_MOUSE Caireticulin OS=Mus musculus GN=Cair PE=1 SV=1         |        |         |         |         |       |      |            |         |                                  |               |             |          |
|             |          |       |                   |       |     | 49                                                                       | 55     | 369.3   | 736.59  | 736.41  | 0.17  | 0    | 52         |         | 0.0001036 K.FVLSSGK.F            |               | 18.47       |          |
|             |          |       |                   |       |     | 65                                                                       | 73     | 488.16  | 974.3   | 974.48  | -0.18 | 0    | 35         |         | 0.01766 K.GLQTSQDAR.F            |               | 14.76       |          |
|             |          |       |                   |       |     | 74                                                                       | 80     | 400.16  | 798.3   | 798.43  | -0.13 | 0    | 44         |         | 0.0017505 R.FYALSAK.F            |               | 22.32       |          |
|             |          |       |                   |       |     | 88                                                                       | 98     | 610.26  | 1218.51 | 1218.7  | -0.19 | 0    | 49         |         | 0.0007019 K.GQTLVVQFTVK.H        |               | 24.98       |          |
|             |          |       |                   |       |     | 112                                                                      | 120    | 502.69  | 1003.36 | 1003.53 | -0.18 | 0    | 44         |         | 0.0025679 K.LFPSGLDQK.D          |               | 23.54       |          |
|             |          |       |                   |       |     | 279                                                                      | 286    | 496.65  | 991.29  | 991.46  | -0.18 | 0    | 35         |         | 0.0116452 R.QIDNPDK.G            |               | 15.78       |          |
| P60710      | 14%      | 246   | 5                 | 42052 | 5.3 | P60710 ACTB_MOUSE Actin, cytoplasmic 1 OS=Mus musculus GN=Actb PE=1 SV=1 |        |         |         |         |       |      |            |         |                                  |               |             |          |
|             |          |       |                   |       |     | 19                                                                       | 28     | 488.64  | 975.26  | 975.44  | -0.18 | 0    | 84         |         | 1.35E-07 K.AGFAGDDAPR.A          |               | 17.22       |          |
|             |          |       |                   |       |     | 184                                                                      | 191    | 507.64  | 1013.27 | 1013.47 | -0.2  | 0    | 30         |         | 0.0195421 R.DLTDYLMK.I           | Oxidation (M) | 25.38       |          |
|             |          |       |                   |       |     | 285                                                                      | 290    | 389.11  | 776.2   | 776.35  | -0.15 | 0    | 47         |         | 0.0005796 K.CDVDIR.K             |               | 16.91       |          |
|             |          |       |                   |       |     | 316                                                                      | 326    | 589.3   | 1176.59 | 1176.61 | -0.02 | 0    | 49         |         | 0.0006773 K.EITALAPSTMK.I        | Oxidation (M) | 20.75       |          |
|             |          |       |                   |       |     | 329                                                                      | 335    | 398.17  | 794.33  | 794.47  | -0.13 | 0    | 35         |         | 0.0139125 K.IIAPPER.K            |               | 17.17       |          |
| P60710      | 19%      | 346   | 7                 | 42052 | 5.3 | P60710 ACTB_MOUSE Actin, cytoplasmic 1 OS=Mus musculus GN=Actb PE=1 SV=1 |        |         |         |         |       |      |            |         |                                  |               |             |          |
|             |          |       |                   |       |     | 19                                                                       | 28     | 488.63  | 975.25  | 975.44  | -0.19 | 0    | 73         |         | 1.38E-06 K.AGFAGDDAPR.A          |               | 17.13       |          |
|             |          |       |                   |       |     | 96                                                                       | 113    | 651.9   | 1952.69 | 1953.06 | -0.37 | 0    | 42         |         | 0.0029628 R.VAPEEHPVLLTEAPLNPK.A |               | 24.52       |          |
|             |          |       |                   |       |     | 184                                                                      | 191    | 507.65  | 1013.28 | 1013.47 | -0.2  | 0    | 42         |         | 0.0014487 R.DLTDYLMK.I           | Oxidation (M) | 25.48       |          |
|             |          |       |                   |       |     | 197                                                                      | 206    | 566.66  | 1131.31 | 1131.52 | -0.21 | 0    | 54         |         | 0.0001484 R.GYSFTTTAER.E         |               | 22.91       |          |
|             |          |       |                   |       |     | 285                                                                      | 290    | 389.11  | 776.21  | 776.35  | -0.14 | 0    | 44         |         | 0.0013253 K.CDVDIR.K             |               | 16.82       |          |
|             |          |       |                   |       |     | 316                                                                      | 326    | 589.3   | 1176.59 | 1176.61 | -0.02 | 0    | 51         |         | 0.0005009 K.EITALAPSTMK.I        | Oxidation (M) | 20.97       |          |
|             |          |       |                   |       |     | 329                                                                      | 335    | 398.16  | 794.3   | 794.47  | -0.16 | 0    | 41         |         | 0.0039222 K.IIAPPER.K            |               | 17.17       |          |

**\*Footnotes to Supplemental Table 3:**

Data sets were searched with the Mascot search engine (see Perkins et al. (1999)*Electrophoresis* **20**, 3551-3567). Detailed are the SwissProt accession number, the number of distinct proteolytic peptides, and the sequence coverage of the protein (%). Listed is the Mascot protein score as well as the score and expectation value for the individual peptides.

**Supplemental Table 4. Proteins identified by HPLC-MS/MS in 3-hour BCG infected human THP-1 phagosome preparation.\***

ESI-MS/MS raw data obtained on a QSTAR Pulsar i instrument and Mascot search results for trypsin digestion of proteins separated on a 1D-SDS PAGE gel. For summary see Supplemental Table 1.

| accession # | coverage | score  | distinct peptides | mass    | pl    | start AA | end AA       | m/z obs | M obs  | M calc  | delta   | miss    | pept score | exp val     | peptide                          | modifications                 | retent time | Strongest gel slice | # gel slices found |      |    |                            |                            |       |       |   |   |
|-------------|----------|--------|-------------------|---------|-------|----------|--------------|---------|--------|---------|---------|---------|------------|-------------|----------------------------------|-------------------------------|-------------|---------------------|--------------------|------|----|----------------------------|----------------------------|-------|-------|---|---|
| P13473      | 6%       | 150    | 3                 | 45503   | 5.3   | P13473   | LAMP2_HUMAN  | 145     | 152    | 494.29  | 986.57  | 986.55  | 0.01       | 0           | 57                               | 0.0001593 R.IPLNDLFR.C        |             | 22.08               | 2                  | 4    |    |                            |                            |       |       |   |   |
|             |          |        |                   |         |       |          | 153          | 161     | 526.28 | 1050.54 | 1050.5  | 0.03    | 0          | 60          | 7.18E-05 R.CNSLSTLEK.N           |                               | 15.92       |                     |                    |      |    |                            |                            |       |       |   |   |
|             |          |        |                   |         |       |          | 281          | 289     | 551.31 | 1100.61 | 1100.59 | 0.02    | 0          | 33          | 0.0431522 K.YLDFVFAVK.N          |                               | 23.04       |                     |                    |      |    |                            |                            |       |       |   |   |
|             |          |        |                   |         |       |          |              |         |        |         |         |         |            |             |                                  |                               |             |                     |                    |      |    |                            |                            |       |       |   |   |
| Q92542      | 3%       | 85     | 2                 | 79103   | 5.7   | Q92542   | NICA_HUMAN   | 315     | 323    | 485.29  | 968.56  | 968.53  | 0.03       | 0           | 32                               | 0.0436944 K.APDVTTLP.R        |             | 18.72               | 2                  | 2    |    |                            |                            |       |       |   |   |
|             |          |        |                   |         |       |          | 486          | 496     | 543.33 | 1084.64 | 1084.62 | 0.01    | 0          | 53          | 0.0004197 K.ALADVATVLR.GA        |                               | 21.61       |                     |                    |      |    |                            |                            |       |       |   |   |
|             |          |        |                   |         |       |          |              |         |        |         |         |         |            |             |                                  |                               |             |                     |                    |      |    |                            |                            |       |       |   |   |
|             |          |        |                   |         |       |          |              |         |        |         |         |         |            |             |                                  |                               |             |                     |                    |      |    |                            |                            |       |       |   |   |
| P08238      | 8%       | 232    | 5                 | 83554   | 5     | P08238   | HSP90B_HUMAN | 42      | 53     | 638.33  | 1274.64 | 1274.64 | 0          | 0           | 38                               | 0.0118205 R.ELISNASDALDK.I    |             | 20.26               | 3                  | 1    |    |                            |                            |       |       |   |   |
|             |          |        |                   |         |       |          | 73           | 82      | 597.84 | 1193.67 | 1193.64 | 0.03    | 0          | 38          | 0.0110154 K.IDIIPNQER.T          |                               | 20.82       |                     |                    |      |    |                            |                            |       |       |   |   |
|             |          |        |                   |         |       |          | 96           | 107     | 621.85 | 1241.69 | 1241.7  | -0.01   | 0          | 73          | 3.94E-06 K.ADLJNLGTIAK.S         |                               | 21.43       |                     |                    |      |    |                            |                            |       |       |   |   |
|             |          |        |                   |         |       |          | 482          | 491     | 580.8  | 1159.59 | 1159.58 | 0.01    | 0          | 36          | 0.0205253 K.SIYITGESK.E          |                               | 20.34       |                     |                    |      |    |                            |                            |       |       |   |   |
|             |          |        |                   |         |       |          | 492          | 502     | 625.31 | 1248.61 | 1248.61 | 0       | 0          | 47          | 0.0014854 K.EQVANSAFVER.V        |                               | 17.61       |                     |                    |      |    |                            |                            |       |       |   |   |
|             |          |        |                   |         |       |          |              |         |        |         |         |         |            |             |                                  |                               |             |                     |                    |      |    |                            |                            |       |       |   |   |
| P05107      | 7%       | 239    | 5                 | 87976   | 6.7   | P05107   | ITB2_HUMAN   | 156     | 165    | 545.29  | 1088.57 | 1088.55 | 0.02       | 0           | 47                               | 0.0015904 R.ALNEITESGR.I      |             | 15.46               | 3                  | 2    |    |                            |                            |       |       |   |   |
|             |          |        |                   |         |       |          | 166          | 174     | 485.27 | 968.52  | 968.5   | 0.02    | 0          | 44          | 0.0029677 R.IGGSFVVDK.T          |                               | 21.47       |                     |                    |      |    |                            |                            |       |       |   |   |
|             |          |        |                   |         |       |          | 275          | 285     | 563.82 | 1125.63 | 1125.61 | 0.01    | 0          | 56          | 0.000175 K.LGAILTPNDGR.C         |                               | 20.04       |                     |                    |      |    |                            |                            |       |       |   |   |
|             |          |        |                   |         |       |          | 544          | 554     | 582.79 | 1163.57 | 1163.51 | 0.05    | 0          | 44          | 0.0027135 R.YNGQVCGGPR.G         |                               | 13.32       |                     |                    |      |    |                            |                            |       |       |   |   |
|             |          |        |                   |         |       |          | 578          | 586     | 524.26 | 1046.5  | 1046.48 | 0.02    | 0          | 48          | 0.0013416 R.TTEGCLNPR.R          |                               | 13.53       |                     |                    |      |    |                            |                            |       |       |   |   |
|             |          |        |                   |         |       |          |              |         |        |         |         |         |            |             |                                  |                               |             |                     |                    |      |    |                            |                            |       |       |   |   |
| P14625      | 5%       | 157    | 4                 | 92696   | 4.8   | P14625   | ENPL_HUMAN   | 76      | 84     | 541.34  | 1080.66 | 1080.54 | 0.12       | 0           | 45                               | 0.0020299 K.FAFQAEVNR.M       |             | 20.6                | 3                  | 1    |    |                            |                            |       |       |   |   |
|             |          |        |                   |         |       |          | 103          | 114     | 638.33 | 1274.64 | 1274.64 | 0       | 0          | 38          | 0.0118205 R.ELISNASDALDK.I       |                               | 20.26       |                     |                    |      |    |                            |                            |       |       |   |   |
|             |          |        |                   |         |       |          | 548          | 557     | 575.79 | 1149.58 | 1149.53 | 0.05    | 0          | 38          | 0.009999 K.EAESSPFVER.L          |                               | 17.71       |                     |                    |      |    |                            |                            |       |       |   |   |
|             |          |        |                   |         |       |          | 725          | 733     | 497.27 | 992.52  | 992.52  | 0.01    | 0          | 38          | 0.0107979 R.SGYLLPDTK.A          |                               | 20.43       |                     |                    |      |    |                            |                            |       |       |   |   |
|             |          |        |                   |         |       |          |              |         |        |         |         |         |            |             |                                  |                               |             |                     |                    |      |    |                            |                            |       |       |   |   |
| Q14108      | 24%      | 675    | 13 (14)           | 54712   | 5     | Q14108   | SCR2_HUMAN   | 78      | 92     | 584.96  | 1751.85 | 1751.85 | 0          | 1           | 54                               | 0.0002627 R.GETPRVEEVGPYTYR.E |             | 19.91               | 4                  | 6    |    |                            |                            |       |       |   |   |
|             |          |        |                   |         |       |          | 83           | 92      | 606.81 | 1211.61 | 1211.58 | 0.03    | 0          | 59          | 7.77E-05 R.VEEVGPYTYR.E          |                               | 19.87       |                     |                    |      |    |                            |                            |       |       |   |   |
|             |          |        |                   |         |       |          | 116          | 121     | 392.7  | 783.39  | 783.39  | 0       | 0          | 38          | 0.0090756 K.AYVFER.D             |                               | 19.22       |                     |                    |      |    |                            |                            |       |       |   |   |
|             |          |        |                   |         |       |          | 116          | 129     | 537.6  | 1609.78 | 1609.77 | 0.01    | 1          | 38          | 0.0108273 K.AYVFERDOSVDPK.I      |                               | 19.35       |                     |                    |      |    |                            |                            |       |       |   |   |
|             |          |        |                   |         |       |          | 154          | 161     | 481.77 | 961.52  | 961.52  | 0.01    | 0          | 44          | 0.0035188 R.EIIEAMLK.A           | Oxidation (M)                 | 19.74       |                     |                    |      |    |                            |                            |       |       |   |   |
|             |          |        |                   |         |       |          | 228          | 234     | 423.23 | 844.45  | 844.44  | 0       | 0          | 45          | 0.0034974 K.IVEVWNGK.T           |                               | 17.68       |                     |                    |      |    |                            |                            |       |       |   |   |
|             |          |        |                   |         |       |          | 235          | 244     | 632.81 | 1263.61 | 1263.61 | 0       | 0          | 56          | 0.000207 K.TSLDWITDK.C           |                               | 22.71       |                     |                    |      |    |                            |                            |       |       |   |   |
|             |          |        |                   |         |       |          | 263          | 275     | 823.89 | 1645.76 | 1645.74 | 0.01    | 0          | 38          | 0.0114444 K.DEVLVYFSDFCR.S       |                               | 23.03       |                     |                    |      |    |                            |                            |       |       |   |   |
|             |          |        |                   |         |       |          | 331          | 348     | 703.67 | 2107.98 | 2107.98 | 0       | 0          | 50          | 0.0005306 K.NGAPIIMSFPHYQADER.F  | Oxidation (M)                 | 21.57       |                     |                    |      |    |                            |                            |       |       |   |   |
|             |          |        |                   |         |       |          | 391          | 402     | 469.91 | 1406.72 | 1406.7  | 0.02    | 1          | 50          | 0.0006465 K.KLDDFVETGDIR.T       |                               | 20.69       |                     |                    |      |    |                            |                            |       |       |   |   |
|             |          |        |                   |         |       |          | 392          | 402     | 640.32 | 1278.63 | 1278.61 | 0.02    | 0          | 66          | 1.67E-05 K.LDDFVETGDIR.T         |                               | 20.91       |                     |                    |      |    |                            |                            |       |       |   |   |
|             |          |        |                   |         |       |          | 460          | 472     | 676.75 | 1351.49 | 1351.53 | -0.04   | 0          | 44          | 0.0025322 K.GQGSMDDEGTADER.A     |                               | 13.2        |                     |                    |      |    |                            |                            |       |       |   |   |
|             |          |        |                   |         |       |          | 460          | 472     | 684.78 | 1367.55 | 1367.53 | 0.03    | 0          | 64          | 2.62E-05 K.GQGSMDDEGTADER.A      | Oxidation (M)                 | 12.54       |                     |                    |      |    |                            |                            |       |       |   |   |
|             |          |        |                   |         |       |          | 460          | 477     | 640.31 | 1917.91 | 1917.89 | 0.03    | 1          | 76          | 1.39E-06 K.GQGSMDDEGTADERAPLIR.T | Oxidation (M)                 | 16.28       |                     |                    |      |    |                            |                            |       |       |   |   |
|             |          |        |                   |         |       |          | P38646       | 21%     | 794    | 12      | 73920   | 5.9     | P38646     | GRP75_HUMAN | 77                               | 85                            | 479.75      | 957.49              | 957.49             | 0    | 0  | 60                         | 8.63E-05 K.VLENAEGAR.T     |       | 13.31 | 5 | 1 |
|             |          |        |                   |         |       |          |              |         |        |         |         |         |            | 86          | 99                               | 725.87                        | 1449.72     | 1449.71             | 0.01               | 0    | 74 | 2.72E-06 R.TTPSVVAFADGER.L |                            | 20.67 |       |   |   |
| 108         | 121      | 784.88 | 1567.75           | 1567.76 | -0.01 | 0        |              |         |        |         |         |         |            | 87          | 1.41E-07 R.QAVTNPNNFYATK.R       |                               | 18.98       |                     |                    |      |    |                            |                            |       |       |   |   |
| 108         | 122      | 575.62 | 1723.85           | 1723.86 | -0.01 | 1        |              |         |        |         |         |         |            | 49          | 0.000829 R.QAVTNPNNFYATK.R       |                               | 15.97       |                     |                    |      |    |                            |                            |       |       |   |   |
| 174         | 187      | 536.91 | 1607.72           | 1607.76 | -0.04 | 1        |              |         |        |         |         |         |            | 50          | 0.0006465 K.MKETAEVYLGHTAK.N     | Oxidation (M)                 | 13.87       |                     |                    |      |    |                            |                            |       |       |   |   |
| 188         | 202      | 847.93 | 1693.85           | 1693.84 | 0.01  | 0        |              |         |        |         |         |         |            | 60          | 6.65E-05 K.NAVITVPAYFNDSQR.Q     |                               | 21.58       |                     |                    |      |    |                            |                            |       |       |   |   |
| 207         | 218      | 621.84 | 1241.67           | 1241.67 | 0     | 0        |              |         |        |         |         |         |            | 81          | 6.04E-07 K.DAGOISGLNLR.V         |                               | 21.32       |                     |                    |      |    |                            |                            |       |       |   |   |
| 219         | 234      | 823.44 | 1644.87           | 1644.87 | 0     | 0        |              |         |        |         |         |         |            | 81          | 5.17E-07 R.VINEPTAALAYGLDK.S     |                               | 21.63       |                     |                    |      |    |                            |                            |       |       |   |   |
| 293         | 307      | 569.61 | 1705.81           | 1705.83 | -0.02 | 1        |              |         |        |         |         |         |            | 39          | 0.0074801 R.ETGVDLTKDNMALQR.V    | Oxidation (M)                 | 19.11       |                     |                    |      |    |                            |                            |       |       |   |   |
| 349         | 360      | 681.3  | 1360.59           | 1360.74 | -0.15 | 0        |              |         |        |         |         |         |            | 53          | 0.0003801 R.AQFEGIVTDLIR.R       |                               | 22.93       |                     |                    |      |    |                            |                            |       |       |   |   |
| 395         | 405      | 645.85 | 1289.69           | 1289.67 | 0.02  | 0        |              |         |        |         |         |         |            | 72          | 4.03E-06 K.VQQTVDLFR.GA          |                               | 21.19       |                     |                    |      |    |                            |                            |       |       |   |   |
| 635         | 646      | 616.33 | 1230.64           | 1230.66 | -0.01 | 0        |              |         |        |         |         |         |            | 89          | 9.81E-08 R.QAASSLQOASLK.L        |                               | 15.02       |                     |                    |      |    |                            |                            |       |       |   |   |
| P15586      | 16%      | 427    | 8                 | 62840   | 8.6   | P15586   |              |         |        |         |         |         |            | GNS_HUMAN   | 126                              | 137                           | 699.89      | 1397.78             | 1397.77            | 0.01 | 0  | 36                         | 0.0191088 K.IQEPNTFPAILR.S |       | 21.71 | 5 | 2 |
|             |          |        |                   |         |       |          |              |         |        |         |         |         |            | 138         | 149                              | 706.8                         | 1411.59     | 1411.59             | 0                  | 0    | 52 | 0.0004139 R.SMCGYQTFFAGK.Y | Oxidation (M)              | 21.02 |       |   |   |
|             |          |        |                   |         |       |          | 247          | 255     | 525.28 | 1048.54 | 1048.55 | 0       | 0          | 42          | 0.0046808 K.AFQNVFAPR.N          |                               | 20.97       |                     |                    |      |    |                            |                            |       |       |   |   |
|             |          |        |                   |         |       |          | 342          | 349     | 526.26 | 1054.51 | 1054.53 | -0.02   | 0          | 45          | 0.0020994 R.QLYFDIK.V            |                               | 21.28       |                     |                    |      |    |                            |                            |       |       |   |   |
|             |          |        |                   |         |       |          | 389          | 401     | 753.89 | 1505.76 | 1505.76 | 0       | 0          | 92          | 4.37E-08 K.TQMDGMSLLPILR.G       | 2 Oxidation (M)               | 22.1        |                     |                    |      |    |                            |                            |       |       |   |   |
|             |          |        |                   |         |       |          | 410          | 421     | 676.33 | 1350.65 | 1350.64 | 0.01    | 0          | 68          | 9.96E-06 R.SDVLVEYQGEGR.N        |                               | 20.15       |                     |                    |      |    |                            |                            |       |       |   |   |
|             |          |        |                   |         |       |          | 494          | 502     | 493.28 | 984.54  | 984.55  | 0       | 0          | 40          | 0.0083771 K.TIDPELLGK.M          |                               | 20.58       |                     |                    |      |    |                            |                            |       |       |   |   |
|             |          |        |                   |         |       |          | 507          | 519     | 786.83 | 1571.64 | 1571.66 | -0.01   | 0          | 53          | 0.0004205 R.LIMMLQSCSGPTCR.T     | 2 Oxidation (M)               | 14.79       |                     |                    |      |    |                            |                            |       |       |   |   |
|             |          |        |                   |         |       |          |              |         |        |         |         |         |            |             |                                  |                               |             |                     |                    |      |    |                            |                            |       |       |   |   |

| accession # | coverage | score  | distinct peptides | mass    | pl    | start AA | end AA      | m/z obs                                   | M obs                | M calc     | delta | miss | pept score | exp val | peptide | modifications | retent time | Strongest gel slice | # gel slices found |  |        |     |        |         |         |       |        |            |                                                   |                             |          |
|-------------|----------|--------|-------------------|---------|-------|----------|-------------|-------------------------------------------|----------------------|------------|-------|------|------------|---------|---------|---------------|-------------|---------------------|--------------------|--|--------|-----|--------|---------|---------|-------|--------|------------|---------------------------------------------------|-----------------------------|----------|
| P11142      | 12%      | 311    | 6                 | 71082   | 5.4   | P11142   | HSP7C_HUMAN | Heat shock cognate 71 kDa protein         | OS=Homo sapiens      | GN=HSPA8   | PE=1  | SV=1 |            |         |         |               |             |                     |                    |  |        |     |        |         |         |       |        |            |                                                   |                             |          |
|             |          |        |                   |         |       |          |             |                                           |                      |            |       |      |            |         |         |               |             |                     |                    |  | 26     | 36  | 614.81 | 1227.6  | 1227.62 | -0.02 | 0      | 48         | 0.0014589                                         | K.VEIANDQGNR.T              | 15.53    |
|             |          |        |                   |         |       |          |             |                                           |                      |            |       |      |            |         |         |               |             |                     |                    |  | 37     | 49  | 744.36 | 1486.71 | 1486.69 | 0.02  | 0      | 47         | 0.0014842                                         | R.TTPSYVAFDTER.L            | 20.8     |
|             |          |        |                   |         |       |          |             |                                           |                      |            |       |      |            |         |         |               |             |                     |                    |  | 57     | 71  | 833.4  | 1664.78 | 1664.78 | 0     | 0      | 76         | 1.72E-06                                          | K.NQVAMNPTNTVFDK.R          | 19.93    |
|             |          |        |                   |         |       |          |             |                                           |                      |            |       |      |            |         |         |               |             |                     |                    |  | 103    | 112 | 394.21 | 1179.61 | 1179.61 | -0.01 | 1      | 32         | 0.0442088                                         | K.VQVEYKGETK.S              | 13.4     |
|             |          |        |                   |         |       |          |             |                                           |                      |            |       |      |            |         |         |               |             |                     |                    |  | 160    | 171 | 600.34 | 1198.66 | 1198.67 | 0     | 0      | 70         | 8.52E-06                                          | K.DAGTIAGLNVL.R             | 21.76    |
|             |          |        |                   |         |       |          |             |                                           |                      |            |       |      |            |         |         |               |             |                     |                    |  | 221    | 236 | 564.58 | 1690.72 | 1690.72 | 0     | 0      | 40         | 0.0063713                                         | K.STAGDTHLGGEDFDNR.M        | 17.01    |
| P11021      | 8%       | 246    | 5                 | 72402   | 5.1   | P11021   | GRP78_HUMAN | 78 kDa glucose-regulated protein          | OS=Homo sapiens      | GN=HSPA5   | PE=1  | SV=2 |            |         |         |               |             |                     |                    |  |        |     |        |         |         |       |        |            |                                                   |                             |          |
|             |          |        |                   |         |       |          |             |                                           |                      |            |       |      |            |         |         |               |             |                     |                    |  | 50     | 60  | 614.81 | 1227.6  | 1227.62 | -0.02 | 0      | 48         | 0.0014589                                         | R.VEIANDQGNR.I              | 15.53    |
|             |          |        |                   |         |       |          |             |                                           |                      |            |       |      |            |         |         |               |             |                     |                    |  | 82     | 96  | 839.4  | 1676.78 | 1676.8  | -0.02 | 0      | 73         | 3.40E-06                                          | K.NQLTSNPENTVFDK.R          | 20.45    |
|             |          |        |                   |         |       |          |             |                                           |                      |            |       |      |            |         |         |               |             |                     |                    |  | 186    | 197 | 617.32 | 1232.62 | 1232.62 | 0     | 0      | 46         | 0.0016972                                         | K.DAGTIAGLNVMR.I            | 20.41    |
|             |          |        |                   |         |       |          |             |                                           |                      |            |       |      |            |         |         |               |             |                     |                    |  | 345    | 352 | 459.74 | 917.47  | 917.47  | 0     | 0      | 45         | 0.0029008                                         | K.VLESDLK.K                 | 15.4     |
|             |          |        |                   |         |       |          |             |                                           |                      |            |       |      |            |         |         |               |             |                     |                    |  | 524    | 532 | 537.77 | 1073.53 | 1073.55 | -0.01 | 0      | 35         | 0.0247056                                         | K.ITINDQNR.L                | 14.05    |
|             |          |        |                   |         |       |          |             |                                           |                      |            |       |      |            |         |         |               |             |                     |                    |  | P40939 | 8%  | 262    | 6       | 83688   | 9.2   | P40939 | ECHA_HUMAN | Trifunctional enzyme subunit alpha, mitochondrial | OS=Homo sapiens             | GN=HADHA |
| 520         | 531      | 559.8  | 1117.59           | 1117.6  | -0.01 | 0        | 58          | 0.0001337                                 | K.DTSASAVAVGLK.Q     | 19.76      |       |      |            |         |         |               |             |                     |                    |  |        |     |        |         |         |       |        |            |                                                   |                             |          |
| 541         | 549      | 507.25 | 1012.49           | 1012.46 | 0.02  | 0        | 41          | 0.0057684                                 | K.DGPGFYTTR.C        | 19.37      |       |      |            |         |         |               |             |                     |                    |  |        |     |        |         |         |       |        |            |                                                   |                             |          |
| 561         | 569      | 499.79 | 997.56            | 997.54  | 0.01  | 0        | 44          | 0.0029887                                 | R.ILQEGVDPK.K        | 14.75      |       |      |            |         |         |               |             |                     |                    |  |        |     |        |         |         |       |        |            |                                                   |                             |          |
| 611         | 625      | 797.41 | 1592.81           | 1592.79 | 0.02  | 0        | 38          | 0.0122168                                 | R.FGGGNPELLTQMVS.K   | 20.63      |       |      |            |         |         |               |             |                     |                    |  |        |     |        |         |         |       |        |            |                                                   |                             |          |
| 635         | 644      | 602.32 | 1202.62           | 1202.6  | 0.02  | 0        | 35          | 0.0266288                                 | K.GFYIYQEGVK.R       | 21.06      |       |      |            |         |         |               |             |                     |                    |  |        |     |        |         |         |       |        |            |                                                   |                             |          |
| 720         | 728      | 520.78 | 1039.54           | 1039.53 | 0     | 0        | 49          | 0.000881                                  | R.FVDLYGAQK.I        | 20.37      |       |      |            |         |         |               |             |                     |                    |  |        |     |        |         |         |       |        |            |                                                   |                             |          |
| P08962      | 8%       | 106    | 2                 | 26474   | 8.1   | P08962   | CD63_HUMAN  | CD63 antigen                              | OS=Homo sapiens      | GN=CD63    | PE=1  | SV=2 |            |         |         |               |             |                     |                    |  |        |     |        |         |         |       |        |            |                                                   |                             |          |
|             |          |        |                   |         |       |          |             |                                           |                      |            |       |      |            |         |         |               |             |                     |                    |  | 111    | 120 | 637.29 | 1272.56 | 1272.56 | 0     | 0      | 72         | 4.87E-06                                          | K.VMSEFNNNFR.Q              | 19.59    |
|             |          |        |                   |         |       |          |             |                                           |                      |            |       |      |            |         |         |               |             |                     |                    |  | 121    | 128 | 527.2  | 1052.39 | 1052.46 | -0.07 | 0      | 34         | 0.0242779                                         | R.QQMENYPK.N                | 13.1     |
| P38606      | 5%       | 159    | 3                 | 68660   | 5.3   | P38606   | VATA_HUMAN  | Vacuolar ATP synthase catalytic subunit A | OS=Homo sapiens      | GN=ATP6V1A | PE=1  | SV=2 |            |         |         |               |             |                     |                    |  |        |     |        |         |         |       |        |            |                                                   |                             |          |
|             |          |        |                   |         |       |          |             |                                           |                      |            |       |      |            |         |         |               |             |                     |                    |  | 121    | 129 | 451.75 | 901.49  | 901.5   | -0.01 | 0      | 42         | 0.006011                                          | R.GVNVLSLR.D                | 17.87    |
|             |          |        |                   |         |       |          |             |                                           |                      |            |       |      |            |         |         |               |             |                     |                    |  | 281    | 289 | 525.74 | 1049.47 | 1049.48 | -0.01 | 0      | 37         | 0.0156175                                         | R.GNEMSEVL.R.D              | 14.13    |
|             |          |        |                   |         |       |          |             |                                           |                      |            |       |      |            |         |         |               |             |                     |                    |  | 309    | 323 | 766.4  | 1530.78 | 1530.78 | 0     | 0      | 80         | 6.51E-07                                          | R.TALVANTSNPVAAR.E          | 15.58    |
| P26038      | 5%       | 129    | 3                 | 67892   | 6.1   | P26038   | MOES_HUMAN  | Moesin                                    | OS=Homo sapiens      | GN=MSN     | PE=1  | SV=3 |            |         |         |               |             |                     |                    |  |        |     |        |         |         |       |        |            |                                                   |                             |          |
|             |          |        |                   |         |       |          |             |                                           |                      |            |       |      |            |         |         |               |             |                     |                    |  | 428    | 435 | 482.23 | 962.45  | 962.49  | -0.03 | 0      | 43         | 0.0042405                                         | R.ISQLEMAR.Q                | 13.92    |
|             |          |        |                   |         |       |          |             |                                           |                      |            |       |      |            |         |         |               |             |                     |                    |  | 449    | 458 | 603.8  | 1205.59 | 1205.56 | 0.03  | 0      | 46         | 0.0018111                                         | K.AQMVQEDLEK.T              | 14.31    |
|             |          |        |                   |         |       |          |             |                                           |                      |            |       |      |            |         |         |               |             |                     |                    |  | 569    | 577 | 585.76 | 1169.5  | 1169.5  | 0     | 1      | 40         | 0.0061499                                         | K.QRIDEFESM.-               | 19.02    |
| Q12931      | 4%       | 125    | 3                 | 80345   | 8.3   | Q12931   | TRAP1_HUMAN | Heat shock protein 75 kDa, mitochondrial  | OS=Homo sapiens      | GN=TRAP1   | PE=1  | SV=3 |            |         |         |               |             |                     |                    |  |        |     |        |         |         |       |        |            |                                                   |                             |          |
|             |          |        |                   |         |       |          |             |                                           |                      |            |       |      |            |         |         |               |             |                     |                    |  | 115    | 126 | 645.35 | 1288.68 | 1288.65 | 0.03  | 0      | 49         | 0.000963                                          | R.ELISNASDALEK.L            | 20.23    |
|             |          |        |                   |         |       |          |             |                                           |                      |            |       |      |            |         |         |               |             |                     |                    |  | 358    | 368 | 591.31 | 1180.6  | 1180.61 | -0.01 | 0      | 41         | 0.005405                                          | R.ELGSSVALYSR.K             | 20.32    |
|             |          |        |                   |         |       |          |             |                                           |                      |            |       |      |            |         |         |               |             |                     |                    |  | 693    | 699 | 414.76 | 827.5   | 827.51  | -0.01 | 0      | 36         | 0.0193684                                         | R.LNELLVK.A                 | 20.02    |
| P04062      | 3%       | 77     | 2                 | 60134   | 7.3   | P04062   | GLCM_HUMAN  | Glucosylceramidase                        | OS=Homo sapiens      | GN=GBA     | PE=1  | SV=3 |            |         |         |               |             |                     |                    |  |        |     |        |         |         |       |        |            |                                                   |                             |          |
|             |          |        |                   |         |       |          |             |                                           |                      |            |       |      |            |         |         |               |             |                     |                    |  | 317    | 324 | 510.27 | 1018.53 | 1018.51 | 0.01  | 0      | 37         | 0.0166117                                         | R.LLLDDQ.R.L                | 20.06    |
|             |          |        |                   |         |       |          |             |                                           |                      |            |       |      |            |         |         |               |             |                     |                    |  | 333    | 342 | 521.8  | 1041.58 | 1041.57 | 0.01  | 0      | 40         | 0.0084364                                         | K.VVLTDPAAK.Y               | 17.21    |
| P10809      | 18%      | 512    | 9                 | 61187   | 5.7   | P10809   | CH60_HUMAN  | 60 kDa heat shock protein, mitochondrial  | OS=Homo sapiens      | GN=HSPD1   | PE=1  | SV=2 |            |         |         |               |             |                     |                    |  |        |     |        |         |         |       |        |            |                                                   |                             |          |
|             |          |        |                   |         |       |          |             |                                           |                      |            |       |      |            |         |         |               |             |                     |                    |  | 97     | 121 | 854.07 | 2559.2  | 2559.24 | -0.04 | 0      | 85         | 1.55E-07                                          | K.LVQDVANNNTNEEAGDGTATVLR.S | 20.25    |
|             |          |        |                   |         |       |          |             |                                           |                      |            |       |      |            |         |         |               |             |                     |                    |  | 222    | 233 | 695.34 | 1388.66 | 1388.7  | -0.04 | 0      | 44         | 0.0030869                                         | R.GYISPYFINTSK.G            | 21.33    |
|             |          |        |                   |         |       |          |             |                                           |                      |            |       |      |            |         |         |               |             |                     |                    |  | 293    | 301 | 456.79 | 911.57  | 911.58  | -0.01 | 0      | 70         | 5.84E-06                                          | K.VGLQVVAVK.A               | 20.08    |
|             |          |        |                   |         |       |          |             |                                           |                      |            |       |      |            |         |         |               |             |                     |                    |  | 302    | 309 | 417.2  | 832.39  | 832.38  | 0     | 0      | 34         | 0.0396432                                         | K.APGFGDNR.K                | 13.93    |
|             |          |        |                   |         |       |          |             |                                           |                      |            |       |      |            |         |         |               |             |                     |                    |  | 345    | 352 | 422.76 | 843.5   | 843.51  | -0.01 | 0      | 41         | 0.0081928                                         | K.VGVEIVTK.D                | 14.85    |
|             |          |        |                   |         |       |          |             |                                           |                      |            |       |      |            |         |         |               |             |                     |                    |  | 345    | 359 | 549.63 | 1645.87 | 1645.9  | -0.03 | 1      | 46         | 0.0019013                                         | K.VGVEIVTKDDAMLLK.G         | 20.34    |
|             |          |        |                   |         |       |          |             |                                           |                      |            |       |      |            |         |         |               |             |                     |                    |  | 406    | 417 | 617.3  | 1232.59 | 1232.59 | 0     | 0      | 75         | 2.63E-06                                          | K.VVGTSDVEVNEK.K            | 13.71    |
|             |          |        |                   |         |       |          |             |                                           |                      |            |       |      |            |         |         |               |             |                     |                    |  | 471    | 481 | 401.58 | 1201.71 | 1201.71 | 0     | 1      | 59         | 0.0001083                                         | R.TLKIPAMTIAK.N             | 18.94    |
|             |          |        |                   |         |       |          |             |                                           |                      |            |       |      |            |         |         |               |             |                     |                    |  | 482    | 493 | 608.33 | 1214.64 | 1214.65 | -0.01 | 0      | 64         | 3.72E-05                                          | K.NAGVEGSLIVEK.I            | 19.95    |
| P15289      | 7%       | 109    | 3                 | 54409   | 5.7   | P15289   | ARSA_HUMAN  | Arylsulfatase A                           | OS=Homo sapiens      | GN=ARSA    | PE=1  | SV=3 |            |         |         |               |             |                     |                    |  |        |     |        |         |         |       |        |            |                                                   |                             |          |
|             |          |        |                   |         |       |          |             |                                           |                      |            |       |      |            |         |         |               |             |                     |                    |  | 85     | 97  | 713.34 | 1424.67 | 1424.68 | -0.01 | 0      | 35         | 0.0227724                                         | R.MGMYPGLVLPSSR.G           | 20.42    |
|             |          |        |                   |         |       |          |             |                                           |                      |            |       |      |            |         |         |               |             |                     |                    |  | 303    | 311 | 470.23 | 938.45  | 938.45  | 0     | 0      | 33         | 0.0274773                                         | K.GTTTVEGGV.R.E             | 13.4     |
| 464         | 479      | 815.92 | 1629.85           | 1629.85 | -0.02 | 0        | 41          | 0.0053385                                 | K.AQLDAAVTFGPSQVAR.G | 20.99      |       |      |            |         |         |               |             |                     |                    |  |        |     |        |         |         |       |        |            |                                                   |                             |          |
| P07237      | 7%       | 172    | 3                 | 57480   | 4.8   | P07237   | PDIA1_HUMAN | Protein disulfide-isomerase               | OS=Homo sapiens      | GN=P4HB    | PE=1  | SV=3 |            |         |         |               |             |                     |                    |  |        |     |        |         |         |       |        |            |                                                   |                             |          |
|             |          |        |                   |         |       |          |             |                                           |                      |            |       |      |            |         |         |               |             |                     |                    |  | 317    | 326 | 611.82 | 1221.63 | 1221.62 | 0.01  | 0      | 50         | 0.0006901                                         | R.LITLEEEMTK.Y              | 19.9     |
|             |          |        |                   |         |       |          |             |                                           |                      |            |       |      |            |         |         |               |             |                     |                    |  | 327    | 338 | 484.56 | 1450.69 | 1450.69 | -0.03 | 0      | 54         | 0.0002432                                         | K.YKPESEELTAER.I            | 14.68    |
|             |          |        |                   |         |       |          |             |                                           |                      |            |       |      |            |         |         |               |             |                     |                    |  | 425    | 436 | 655.29 | 1308.56 | 1308.59 | -0.02 | 0      | 68         | 1.24E-05                                          | R.KMDSTANEVAVK.V            | 14.59    |
| P31146      | 6%       | 81     | 2                 | 51678   | 6.3   | P31146   | COR1A_HUMAN | Coronin-1A                                | OS=Homo sapiens      | GN=CORO1A  | PE=1  | SV=4 |            |         |         |               |             |                     |                    |  |        |     |        |         |         |       |        |            |                                                   |                             |          |
|             |          |        |                   |         |       |          |             |                                           |                      |            |       |      |            |         |         |               |             |                     |                    |  | 384    | 393 | 513.82 | 1025.63 | 1025.61 | 0.01  | 0      | 39         | 0.0075784                                         | R.DAGPLLIISK.D              | 22.12    |
|             |          |        |                   |         |       |          |             |                                           |                      |            |       |      |            |         |         |               |             |                     |                    |  | 417    | 432 | 751.82 | 1501.62 | 1501.7  | -0.08 | 0      | 42         | 0.0046312                                         | R.AAPEASGTPSSDAVSR.L        | 13.79    |

| accession # | coverage | score  | distinct peptides | mass    | pl    | start AA | end AA      | m/z obs                                        | M obs                      | M calc        | delta | miss | pept score | exp val | peptide | modifications | retent time | Strongest gel slice | # gel slices found |        |     |        |         |         |       |        |             |                                                |                           |               |       |      |  |  |  |  |  |   |   |     |     |        |         |         |       |   |    |           |                  |               |       |
|-------------|----------|--------|-------------------|---------|-------|----------|-------------|------------------------------------------------|----------------------------|---------------|-------|------|------------|---------|---------|---------------|-------------|---------------------|--------------------|--------|-----|--------|---------|---------|-------|--------|-------------|------------------------------------------------|---------------------------|---------------|-------|------|--|--|--|--|--|---|---|-----|-----|--------|---------|---------|-------|---|----|-----------|------------------|---------------|-------|
| P25705      | 26%      | 820    | 13                | 59828   | 9.2   | P25705   | ATPA_HUMAN  | ATP synthase subunit alpha, mitochondrial      | OS=Homo sapiens            | GN=ATP5A1     | PE=1  | SV=1 |            |         |         |               |             | 8                   | 1                  |        |     |        |         |         |       |        |             |                                                |                           |               |       |      |  |  |  |  |  |   |   |     |     |        |         |         |       |   |    |           |                  |               |       |
|             |          |        |                   |         |       |          |             |                                                |                            |               |       |      |            |         |         |               |             |                     |                    | 46     | 58  | 720.33 | 1438.65 | 1438.66 | -0.01 | 0      | 82          | 4.34E-07                                       | K.TGTAEMSSILEER.I         | Oxidation (M) | 19.17 |      |  |  |  |  |  |   |   |     |     |        |         |         |       |   |    |           |                  |               |       |
|             |          |        |                   |         |       |          |             |                                                |                            |               |       |      |            |         |         |               |             |                     |                    | 59     | 73  | 788.4  | 1574.79 | 1574.78 | 0.01  | 0      | 98          | 1.05E-08                                       | R.ILGADTSDVLEETGR.V       |               | 20.69 |      |  |  |  |  |  |   |   |     |     |        |         |         |       |   |    |           |                  |               |       |
|             |          |        |                   |         |       |          |             |                                                |                            |               |       |      |            |         |         |               |             |                     |                    | 74     | 83  | 500.78 | 999.55  | 999.57  | -0.02 | 0      | 54          | 0.0003151                                      | R.VLSIGDGIAR.V            |               | 20.43 |      |  |  |  |  |  |   |   |     |     |        |         |         |       |   |    |           |                  |               |       |
|             |          |        |                   |         |       |          |             |                                                |                            |               |       |      |            |         |         |               |             |                     |                    | 134    | 149 | 812.94 | 1623.87 | 1623.88 | -0.02 | 0      | 55          | 0.000229                                       | R.TGAIIVDPVGEELLGR.V      |               | 22.18 |      |  |  |  |  |  |   |   |     |     |        |         |         |       |   |    |           |                  |               |       |
|             |          |        |                   |         |       |          |             |                                                |                            |               |       |      |            |         |         |               |             |                     |                    | 150    | 161 | 586.31 | 1170.61 | 1170.62 | -0.01 | 0      | 90          | 8.54E-08                                       | R.VVDALGNADGK.G           |               | 20.3  |      |  |  |  |  |  |   |   |     |     |        |         |         |       |   |    |           |                  |               |       |
|             |          |        |                   |         |       |          |             |                                                |                            |               |       |      |            |         |         |               |             |                     |                    | 150    | 167 | 570.97 | 1709.89 | 1709.93 | -0.04 | 1      | 54          | 0.0002649                                      | R.VVDALGNADGKPGIGK.T      |               | 20.35 |      |  |  |  |  |  |   |   |     |     |        |         |         |       |   |    |           |                  |               |       |
|             |          |        |                   |         |       |          |             |                                                |                            |               |       |      |            |         |         |               |             |                     |                    | 172    | 182 | 374.24 | 1119.69 | 1119.71 | -0.02 | 1      | 59          | 8.82E-05                                       | R.VGLKAPGIIPR.I           |               | 20.04 |      |  |  |  |  |  |   |   |     |     |        |         |         |       |   |    |           |                  |               |       |
|             |          |        |                   |         |       |          |             |                                                |                            |               |       |      |            |         |         |               |             |                     |                    | 183    | 194 | 458.91 | 1373.71 | 1373.73 | -0.03 | 1      | 41          | 0.0060141                                      | R.ISVREPMTGIIK.A          | Oxidation (M) | 14.52 |      |  |  |  |  |  |   |   |     |     |        |         |         |       |   |    |           |                  |               |       |
|             |          |        |                   |         |       |          |             |                                                |                            |               |       |      |            |         |         |               |             |                     |                    | 195    | 204 | 513.79 | 1025.57 | 1025.59 | -0.02 | 0      | 54          | 0.0002539                                      | K.AVDSLVPPIGR.G           |               | 20.74 |      |  |  |  |  |  |   |   |     |     |        |         |         |       |   |    |           |                  |               |       |
|             |          |        |                   |         |       |          |             |                                                |                            |               |       |      |            |         |         |               |             |                     |                    | 219    | 230 | 658.86 | 1315.71 | 1315.73 | -0.03 | 0      | 77          | 1.76E-06                                       | K.TSIAIDTINQK.R           |               | 21.26 |      |  |  |  |  |  |   |   |     |     |        |         |         |       |   |    |           |                  |               |       |
|             |          |        |                   |         |       |          |             |                                                |                            |               |       |      |            |         |         |               |             |                     |                    | 254    | 261 | 423.25 | 844.49  | 844.5   | -0.01 | 0      | 47          | 0.0019398                                      | R.STVAQLVK.R              |               | 16.38 |      |  |  |  |  |  |   |   |     |     |        |         |         |       |   |    |           |                  |               |       |
|             |          |        |                   |         |       |          |             |                                                |                            |               |       |      |            |         |         |               |             |                     |                    | 335    | 347 | 518.58 | 1552.71 | 1552.73 | -0.02 | 0      | 33          | 0.0319685                                      | R.EAYPGDVFYHLHSR.L        |               | 21.13 |      |  |  |  |  |  |   |   |     |     |        |         |         |       |   |    |           |                  |               |       |
|             |          |        |                   |         |       |          |             |                                                |                            |               |       |      |            |         |         |               |             |                     |                    | 435    | 441 | 446.74 | 891.47  | 891.48  | -0.02 | 0      | 47          | 0.0016589                                      | K.LELAQYR.E               |               | 19.82 |      |  |  |  |  |  |   |   |     |     |        |         |         |       |   |    |           |                  |               |       |
|             |          |        |                   |         |       |          |             |                                                |                            |               |       |      |            |         |         |               |             |                     |                    | P21281 | 25% | 568    | 10      | 56807   | 5.6   | P21281 | VATB2_HUMAN | Vacuolar ATP synthase subunit B, brain isoform | OS=Homo sapiens           | GN=ATP6V1B2   | PE=1  | SV=3 |  |  |  |  |  | 8 | 1 |     |     |        |         |         |       |   |    |           |                  |               |       |
| 30          | 37       | 437.23 | 872.45            | 872.47  | -0.02 | 0        | 48          | 0.0014662                                      | R.EQALAVSR.N               |               | 13.96 |      |            |         |         |               |             |                     |                    |        |     |        |         |         |       |        |             |                                                |                           |               |       |      |  |  |  |  |  |   |   |     |     |        |         |         |       |   |    |           |                  |               |       |
| 83          | 93       | 545.79 | 1089.56           | 1089.57 | -0.01 | 0        | 72          | 4.68E-06                                       | R.SGQVLEVSQSK.A            |               | 14.65 |      |            |         |         |               |             |                     |                    |        |     |        |         |         |       |        |             |                                                |                           |               |       |      |  |  |  |  |  |   |   |     |     |        |         |         |       |   |    |           |                  |               |       |
| 94          | 108      | 760.89 | 1519.76           | 1519.79 | -0.02 | 0        | 83          | 3.95E-07                                       | K.AVVQVFEGTSGIDAK.K        |               | 20.91 |      |            |         |         |               |             |                     |                    |        |     |        |         |         |       |        |             |                                                |                           |               |       |      |  |  |  |  |  |   |   |     |     |        |         |         |       |   |    |           |                  |               |       |
| 121         | 130      | 560.77 | 1119.52           | 1119.52 | -0.01 | 0        | 44          | 0.0032377                                      | R.TPVSEDMGLR.V             | Oxidation (M) | 14.74 |      |            |         |         |               |             |                     |                    |        |     |        |         |         |       |        |             |                                                |                           |               |       |      |  |  |  |  |  |   |   |     |     |        |         |         |       |   |    |           |                  |               |       |
| 131         | 141      | 397.2  | 1188.59           | 1188.63 | -0.03 | 0        | 36          | 0.0201029                                      | R.VFNGSGKPIDR.G            |               | 13.6  |      |            |         |         |               |             |                     |                    |        |     |        |         |         |       |        |             |                                                |                           |               |       |      |  |  |  |  |  |   |   |     |     |        |         |         |       |   |    |           |                  |               |       |
| 164         | 185      | 814.37 | 2440.09           | 2440.16 | -0.07 | 0        | 44          | 0.0021521                                      | R.IYPEEMIQTGISAIDGMNSIAR.G | Oxidation (M) | 22.05 |      |            |         |         |               |             |                     |                    |        |     |        |         |         |       |        |             |                                                |                           |               |       |      |  |  |  |  |  |   |   |     |     |        |         |         |       |   |    |           |                  |               |       |
| 322         | 337      | 956.97 | 1911.93           | 1911.87 | 0.06  | 0        | 44          | 0.0026051                                      | R.GFPGYMYTDLATIYER.A       | Oxidation (M) | 22.48 |      |            |         |         |               |             |                     |                    |        |     |        |         |         |       |        |             |                                                |                           |               |       |      |  |  |  |  |  |   |   |     |     |        |         |         |       |   |    |           |                  |               |       |
| 387         | 400      | 798.97 | 1595.92           | 1595.9  | 0.02  | 0        | 39          | 0.0089158                                      | R.QIYPINVLPSLSR.L          |               | 22.35 |      |            |         |         |               |             |                     |                    |        |     |        |         |         |       |        |             |                                                |                           |               |       |      |  |  |  |  |  |   |   |     |     |        |         |         |       |   |    |           |                  |               |       |
| 461         | 471      | 654.81 | 1307.61           | 1307.63 | -0.01 | 0        | 46          | 0.0018394                                      | R.NFIAQGPYENR.T            |               | 20.08 |      |            |         |         |               |             |                     |                    |        |     |        |         |         |       |        |             |                                                |                           |               |       |      |  |  |  |  |  |   |   |     |     |        |         |         |       |   |    |           |                  |               |       |
| 495         | 506      | 719.36 | 1436.7            | 1436.73 | -0.03 | 0        | 83          | 3.07E-07                                       | R.IPOSTLSEFYPR.D           |               | 21.43 |      |            |         |         |               |             |                     |                    |        |     |        |         |         |       |        |             |                                                |                           |               |       |      |  |  |  |  |  |   |   |     |     |        |         |         |       |   |    |           |                  |               |       |
| P06576      | 15%      | 292    | 6                 | 56525   | 5.3   | P06576   | ATPB_HUMAN  | ATP synthase subunit beta, mitochondrial       | OS=Homo sapiens            | GN=ATP5B      | PE=1  | SV=3 |            |         |         |               |             | 8                   | 3                  |        |     |        |         |         |       |        |             |                                                |                           |               |       |      |  |  |  |  |  |   |   |     |     |        |         |         |       |   |    |           |                  |               |       |
|             |          |        |                   |         |       |          |             |                                                |                            |               |       |      |            |         |         |               |             |                     |                    |        |     |        |         |         |       |        |             |                                                |                           |               |       |      |  |  |  |  |  |   |   | 110 | 121 | 639.81 | 1277.61 | 1277.63 | -0.02 | 0 | 53 | 0.0003423 | R.TIAMDGTGLVLR.G | Oxidation (M) | 19.43 |
|             |          |        |                   |         |       |          |             |                                                |                            |               |       |      |            |         |         |               |             |                     |                    |        |     |        |         |         |       |        |             |                                                |                           |               |       |      |  |  |  |  |  |   |   | 144 | 155 | 701.35 | 1400.68 | 1400.7  | -0.02 | 0 | 40 | 0.0079282 | R.IMNVIGEPIDR.G  | Oxidation (M) | 20.39 |
|             |          |        |                   |         |       |          |             |                                                |                            |               |       |      |            |         |         |               |             |                     |                    |        |     |        |         |         |       |        |             |                                                |                           |               |       |      |  |  |  |  |  |   |   | 189 | 198 | 544.81 | 1087.6  | 1087.63 | -0.02 | 0 | 40 | 0.0092199 | K.VVDLAPYAK.G    |               | 21.57 |
|             |          |        |                   |         |       |          |             |                                                |                            |               |       |      |            |         |         |               |             |                     |                    | 202    | 212 | 488.28 | 974.55  | 974.55  | -0.01 | 0      | 55          | 0.0002825                                      | K.IGLFGAGVKG.T            |               | 21.22 |      |  |  |  |  |  |   |   |     |     |        |         |         |       |   |    |           |                  |               |       |
|             |          |        |                   |         |       |          |             |                                                |                            |               |       |      |            |         |         |               |             |                     |                    | 282    | 294 | 720.38 | 1438.74 | 1438.78 | -0.05 | 0      | 55          | 0.0002049                                      | R.VALTGLTVAEYFR.D         |               | 22.91 |      |  |  |  |  |  |   |   |     |     |        |         |         |       |   |    |           |                  |               |       |
|             |          |        |                   |         |       |          |             |                                                |                            |               |       |      |            |         |         |               |             |                     |                    | 388    | 406 | 994.51 | 1987.01 | 1987.03 | -0.02 | 0      | 50          | 0.0005802                                      | R.AIAELGIYPAVDPLDSTR.I    |               | 22.52 |      |  |  |  |  |  |   |   |     |     |        |         |         |       |   |    |           |                  |               |       |
|             |          |        |                   |         |       |          |             |                                                |                            |               |       |      |            |         |         |               |             |                     |                    | Q9UHL4 | 12% | 264    | 5       | 54749   | 5.9   | Q9UHL4 | DPP2_HUMAN  | Dipeptidyl-peptidase 2                         | OS=Homo sapiens           | GN=DPP7       | PE=1  | SV=2 |  |  |  |  |  | 8 | 1 |     |     |        |         |         |       |   |    |           |                  |               |       |
|             |          |        |                   |         |       |          |             |                                                |                            |               |       |      |            |         |         |               |             |                     |                    |        |     |        |         |         |       |        |             |                                                |                           |               |       |      |  |  |  |  |  |   |   | 26  | 34  | 508.74 | 1015.47 | 1015.47 | 0     | 0 | 39 | 0.0110548 | R.APDPGFQER.F    |               | 14.57 |
|             |          |        |                   |         |       |          |             |                                                |                            |               |       |      |            |         |         |               |             |                     |                    |        |     |        |         |         |       |        |             |                                                |                           |               |       |      |  |  |  |  |  |   |   | 113 | 123 | 596.3  | 1190.59 | 1190.6  | -0.01 | 0 | 51 | 0.0005441 | K.SLPFGAQSTQR.G  |               | 19.91 |
| 204         | 215      | 647.3  | 1292.59           | 1292.59 | 0     | 0        | 59          | 9.93E-05                                       | R.DVTADFEGQSPK.C           |               | 19.95 |      |            |         |         |               |             |                     |                    |        |     |        |         |         |       |        |             |                                                |                           |               |       |      |  |  |  |  |  |   |   |     |     |        |         |         |       |   |    |           |                  |               |       |
| 229         | 240      | 699.33 | 1396.64           | 1396.7  | -0.06 | 0        | 54          | 0.0002658                                      | K.DLFLQGAYDTR.W            |               | 22.26 |      |            |         |         |               |             |                     |                    |        |     |        |         |         |       |        |             |                                                |                           |               |       |      |  |  |  |  |  |   |   |     |     |        |         |         |       |   |    |           |                  |               |       |
| 449         | 462      | 488.89 | 1463.64           | 1463.7  | -0.06 | 0        | 60          | 6.01E-05                                       | R.ASHPEDPASVVEAR.K         |               | 15.92 |      |            |         |         |               |             |                     |                    |        |     |        |         |         |       |        |             |                                                |                           |               |       |      |  |  |  |  |  |   |   |     |     |        |         |         |       |   |    |           |                  |               |       |
| P34897      | 10%      | 241    | 5                 | 56414   | 8.8   | P34897   | GLYM_HUMAN  | Serine hydroxymethyltransferase, mitochondrial | OS=Homo sapiens            | GN=SHMT2      | PE=1  | SV=3 |            |         |         |               |             | 8                   | 1                  |        |     |        |         |         |       |        |             |                                                |                           |               |       |      |  |  |  |  |  |   |   |     |     |        |         |         |       |   |    |           |                  |               |       |
|             |          |        |                   |         |       |          |             |                                                |                            |               |       |      |            |         |         |               |             |                     |                    | 201    | 214 | 774.91 | 1547.8  | 1547.83 | -0.03 | 0      | 86          | 1.71E-07                                       | K.TGLIDYNQLALTAR.L        |               | 21.87 |      |  |  |  |  |  |   |   |     |     |        |         |         |       |   |    |           |                  |               |       |
|             |          |        |                   |         |       |          |             |                                                |                            |               |       |      |            |         |         |               |             |                     |                    | 220    | 230 | 568.31 | 1134.61 | 1134.64 | -0.03 | 0      | 48          | 0.001069                                       | R.LIIAGTAYAR.L            |               | 20.22 |      |  |  |  |  |  |   |   |     |     |        |         |         |       |   |    |           |                  |               |       |
|             |          |        |                   |         |       |          |             |                                                |                            |               |       |      |            |         |         |               |             |                     |                    | 349    | 356 | 490.27 | 978.52  | 978.54  | -0.02 | 0      | 38          | 0.0108776                                      | R.EYSLQVLK.N              |               | 20.78 |      |  |  |  |  |  |   |   |     |     |        |         |         |       |   |    |           |                  |               |       |
|             |          |        |                   |         |       |          |             |                                                |                            |               |       |      |            |         |         |               |             |                     |                    | 360    | 368 | 503.24 | 1004.47 | 1004.5  | -0.03 | 0      | 36          | 0.021457                                       | R.AMADALLER.G             | Oxidation (M) | 19.13 |      |  |  |  |  |  |   |   |     |     |        |         |         |       |   |    |           |                  |               |       |
|             |          |        |                   |         |       |          |             |                                                |                            |               |       |      |            |         |         |               |             |                     |                    | 426    | 434 | 443.25 | 884.49  | 884.51  | -0.02 | 0      | 33          | 0.0411395                                      | R.LGAPALTSR.Q             |               | 16.47 |      |  |  |  |  |  |   |   |     |     |        |         |         |       |   |    |           |                  |               |       |
| Q95766      | 9%       | 230    | 4                 | 56286   | 6.1   | Q95766   | CG028_HUMAN | UPF0550 protein C7orf28                        | OS=Homo sapiens            | GN=C7orf28A   | PE=1  | SV=1 |            |         |         |               |             | 8                   | 1                  |        |     |        |         |         |       |        |             |                                                |                           |               |       |      |  |  |  |  |  |   |   |     |     |        |         |         |       |   |    |           |                  |               |       |
|             |          |        |                   |         |       |          |             |                                                |                            |               |       |      |            |         |         |               |             |                     |                    | 213    | 221 | 539.78 | 1077.55 | 1077.54 | 0.01  | 0      | 42          | 0.0049385                                      | R.MEESLNIVK.Y             | Oxidation (M) | 19.09 |      |  |  |  |  |  |   |   |     |     |        |         |         |       |   |    |           |                  |               |       |
|             |          |        |                   |         |       |          |             |                                                |                            |               |       |      |            |         |         |               |             |                     |                    | 247    | 255 | 549.29 | 1096.57 | 1096.59 | -0.02 | 0      | 43          | 0.0033952                                      | K.YLTTSLFPR.H             |               | 21.65 |      |  |  |  |  |  |   |   |     |     |        |         |         |       |   |    |           |                  |               |       |
|             |          |        |                   |         |       |          |             |                                                |                            |               |       |      |            |         |         |               |             |                     |                    | 282    | 295 | 757.88 | 1513.75 | 1513.78 | -0.03 | 0      | 76          | 1.49E-06                                       | R.FLTGPLNLDPPAK.C         |               | 21.61 |      |  |  |  |  |  |   |   |     |     |        |         |         |       |   |    |           |                  |               |       |
|             |          |        |                   |         |       |          |             |                                                |                            |               |       |      |            |         |         |               |             |                     |                    | 448    | 456 | 560.32 | 1118.62 | 1118.63 | -0.02 | 0      | 68          | 1.18E-05                                       | R.ELYVILNQK.N             |               | 21.04 |      |  |  |  |  |  |   |   |     |     |        |         |         |       |   |    |           |                  |               |       |
| Q8IV08      | 8%       | 188    | 4                 | 55127   | 6     | Q8IV08   | PLD3_HUMAN  | Phospholipase D3                               | OS=Homo sapiens            | GN=PLD3       | PE=1  | SV=1 |            |         |         |               |             | 8                   | 4                  |        |     |        |         |         |       |        |             |                                                |                           |               |       |      |  |  |  |  |  |   |   |     |     |        |         |         |       |   |    |           |                  |               |       |
|             |          |        |                   |         |       |          |             |                                                |                            |               |       |      |            |         |         |               |             |                     |                    | 150    | 157 | 449.77 | 897.53  | 897.53  | 0     | 0      | 52          | 0.0003694                                      | R.QLQTLAPK.G              |               | 14.82 |      |  |  |  |  |  |   |   |     |     |        |         |         |       |   |    |           |                  |               |       |
|             |          |        |                   |         |       |          |             |                                                |                            |               |       |      |            |         |         |               |             |                     |                    | 310    | 319 | 542.81 | 1083.6  | 1083.6  | -0.01 | 0      | 47          | 0.0014244                                      | K.ALLNVVDNAR.S            |               | 20.56 |      |  |  |  |  |  |   |   |     |     |        |         |         |       |   |    |           |                  |               |       |
|             |          |        |                   |         |       |          |             |                                                |                            |               |       |      |            |         |         |               |             |                     |                    | 397    | 408 | 658.35 | 1314.68 | 1314.69 | -0.01 | 0      | 52          | 0.0005311                                      | K.LFVWPADEAQAAR.I         |               | 20.61 |      |  |  |  |  |  |   |   |     |     |        |         |         |       |   |    |           |                  |               |       |
|             |          |        |                   |         |       |          |             |                                                |                            |               |       |      |            |         |         |               |             |                     |                    | 458    | 466 | 538.81 | 1075.6  | 1075.6  | 0     | 0      | 36          | 0.0172679                                      | R.SQLEAIFLR.D             |               | 22    |      |  |  |  |  |  |   |   |     |     |        |         |         |       |   |    |           |                  |               |       |
| P00367      | 8%       | 181    | 3                 | 61701   | 7.7   | P00367   | DHE3_HUMAN  | Glutamate dehydrogenase 1, mitochondrial       | OS=Homo sapiens            | GN=GLUD1      | PE=1  | SV=2 |            |         |         |               |             | 8                   | 1                  |        |     |        |         |         |       |        |             |                                                |                           |               |       |      |  |  |  |  |  |   |   |     |     |        |         |         |       |   |    |           |                  |               |       |
|             |          |        |                   |         |       |          |             |                                                |                            |               |       |      |            |         |         |               |             |                     |                    | 152    | 162 | 621.29 | 1240.56 | 1240.58 | -0.02 | 0      | 59          | 9.23E-05                                       | R.YSTDVSVDEVK.A           |               | 19.26 |      |  |  |  |  |  |   |   |     |     |        |         |         |       |   |    |           |                  |               |       |
|             |          |        |                   |         |       |          |             |                                                |                            |               |       |      |            |         |         |               |             |                     |                    | 400    | 420 | 748.04 | 2241.1  | 2241.16 | -0.07 | 1      | 64          | 2.06E-05                                       | K.IIAEGANGPTTPEADKIFLER.N |               | 21.09 |      |  |  |  |  |  |   |   |     |     |        |         |         |       |   |    |           |                  |               |       |
|             |          |        |                   |         |       |          |             |                                                |                            |               |       |      |            |         |         |               |             |                     |                    | 536    | 545 | 540.4  | 1078.79 | 1078.57 | 0.22  | 0      | 59          | 6.56E-05                                       | R.TAAYVNAIEK.V            |               | 18.02 |      |  |  |  |  |  |   |   |     |     |        |         |         |       |   |    |           |                  |               |       |
| Q9UI12      | 6%       | 135    | 3                 | 56417   | 6.1   | Q9UI12   | VATH_HUMAN  | Vacuolar proton pump subunit H                 | OS=Homo sapiens            | GN=ATP6V1H    | PE=1  | SV=1 |            |         |         |               |             | 8                   | 1                  |        |     |        |         |         |       |        |             |                                                |                           |               |       |      |  |  |  |  |  |   |   |     |     |        |         |         |       |   |    |           |                  |               |       |
|             |          |        |                   |         |       |          |             |                                                |                            |               |       |      |            |         |         |               |             |                     |                    | 284    | 290 | 402.26 | 802.5   | 802.51  | 0     | 0      | 38          | 0.0146311                                      | R.IILAAFR.N               |               | 21.39 |      |  |  |  |  |  |   |   |     |     |        |         |         |       |   |    |           |                  |               |       |
|             |          |        |                   |         |       |          |             |                                                |                            |               |       |      |            |         |         |               |             |                     |                    | 450    | 458 | 510.29 | 1018.56 | 1018.58 | -0.02 | 0      | 52          | 0.0005962                                      | R.YNALLAVQK.L             |               | 20.26 |      |  |  |  |  |  |   |   |     |     |        |         |         |       |   |    |           |                  |               |       |
|             |          |        |                   |         |       |          |             |                                                |                            |               |       |      |            |         |         |               |             |                     |                    | 470    | 482 | 714.33 | 1426.65 | 1426.72 | -0.07 | 0      | 45          | 0.002091                                       | K.QLQSEQPQTAAR.S          |               | 20.36 |      |  |  |  |  |  |   |   |     |     |        |         |         |       |   |    |           |                  |               |       |
| P09622      | 5%       | 123    | 2                 | 54686   | 7.6   | P09622   | DLDH_HUMAN  | Dihydrolipoyl dehydrogenase, mitochondrial     | OS=Homo sapiens            | GN=DLD        | PE=1  | SV=1 |            |         |         |               | 8           | 1                   |                    |        |     |        |         |         |       |        |             |                                                |                           |               |       |      |  |  |  |  |  |   |   |     |     |        |         |         |       |   |    |           |                  |               |       |
| 167         | 177      | 552.78 | 1103.54           | 1103.55 | 0     | 0        | 84          | 3.23E-07                                       | K.ADGGTQVIDTK.N            |               | 13.87 |      |            |         |         |               |             |                     |                    |        |     |        |         |         |       |        |             |                                                |                           |               |       |      |  |  |  |  |  |   |   |     |     |        |         |         |       |   |    |           |                  |               |       |



| accession # | coverage | score  | distinct peptides | mass    | pl    | start AA           | end AA                                                   | m/z obs         | M obs                 | M calc          | delta | miss | pept score | exp val   | peptide                | modifications | retent time | Strongest gel slice | # gel slices found |  |       |       |       |       |   |  |
|-------------|----------|--------|-------------------|---------|-------|--------------------|----------------------------------------------------------|-----------------|-----------------------|-----------------|-------|------|------------|-----------|------------------------|---------------|-------------|---------------------|--------------------|--|-------|-------|-------|-------|---|--|
| O14773      | 6%       | 162    | 3                 | 61723   | 6     | start AA           | end AA                                                   | m/z obs         | M obs                 | M calc          | delta | miss | pept score | exp val   | peptide                |               |             |                     |                    |  |       |       |       |       |   |  |
|             |          |        |                   |         |       | O14773 TPP1_HUMAN  | Tripeptidyl-peptidase 1                                  | OS=Homo sapiens | GN=TPP1               | PE=1            | SV=2  |      |            |           |                        |               |             |                     |                    |  |       |       |       |       |   |  |
|             |          |        |                   |         |       | 246                | 259                                                      | 492.26          | 1473.75               | 1473.75         | 0     | 0    | 52         | 0.0004402 | R.LFGGNFAHQASVAR.V     |               |             |                     |                    |  | 19.87 | 10    | 2     |       |   |  |
|             |          |        |                   |         |       | 340                | 346                                                      | 425.72          | 849.43                | 849.43          | 0     | 0    | 44         | 0.0029614 | R.VNTELMKA             | Oxidation (M) |             |                     |                    |  |       | 13.1  |       |       |   |  |
|             |          |        |                   |         |       | 507                | 520                                                      | 535.61          | 1603.81               | 1603.81         | 0     | 0    | 66         | 1.74E-05  | R.LYQQHGAGLFDVTR.G     |               |             |                     |                    |  |       | 20.39 |       |       |   |  |
| P22695      | 6%       | 169    | 2                 | 48584   | 8.7   | start AA           | end AA                                                   | m/z obs         | M obs                 | M calc          | delta | miss | pept score | exp val   | peptide                |               |             |                     |                    |  |       |       |       |       |   |  |
|             |          |        |                   |         |       | P22695 QCR2_HUMAN  | Cytochrome b-c1 complex subunit 2, mitochondrial         | OS=Homo sapiens | GN=UQCR2              | PE=1            | SV=3  |      |            |           |                        |               |             |                     |                    |  |       |       |       |       |   |  |
|             |          |        |                   |         |       | 232                | 241                                                      | 626.32          | 1250.62               | 1250.61         | 0.02  | 0    | 59         | 9.05E-05  | K.QVAEQFLNMR.G         | Oxidation (M) |             |                     |                    |  |       | 20.09 | 10    | 1     |   |  |
|             |          |        |                   |         |       | 360                | 375                                                      | 815.94          | 1629.87               | 1629.83         | 0.04  | 0    | 110        | 6.60E-10  | K.TIAQGNLSNTDVQAAK.N   |               |             |                     |                    |  |       | 16.41 |       |       |   |  |
| Q9BTU6      | 5%       | 135    | 3                 | 54388   | 8.5   | start AA           | end AA                                                   | m/z obs         | M obs                 | M calc          | delta | miss | pept score | exp val   | peptide                |               |             |                     |                    |  |       |       |       |       |   |  |
|             |          |        |                   |         |       | Q9BTU6 P4K2A_HUMAN | Phosphatidylinositol 4-kinase type 2-alpha               | OS=Homo sapiens | GN=P4K2A              | PE=1            | SV=1  |      |            |           |                        |               |             |                     |                    |  |       |       |       |       |   |  |
|             |          |        |                   |         |       | 116                | 123                                                      | 465.27          | 928.52                | 928.5           | 0.02  | 0    | 56         | 0.000246  | R.QAELAIER.C           |               |             |                     |                    |  |       | 16.46 | 10    | 2     |   |  |
|             |          |        |                   |         |       | 203                | 210                                                      | 477.3           | 952.59                | 952.57          | 0.02  | 0    | 47         | 0.0012929 | K.LELNVIPR.T           |               |             |                     |                    |  |       | 21.09 |       |       |   |  |
| 297         | 305      | 552.36 | 1102.71           | 1102.68 | 0.03  | 0                  | 33                                                       | 0.047918        | R.LVLDYIIR.N          |                 |       |      |            |           |                        |               | 23.09       |                     |                    |  |       |       |       |       |   |  |
| P17050      | 5%       | 93     | 2                 | 47047   | 5     | start AA           | end AA                                                   | m/z obs         | M obs                 | M calc          | delta | miss | pept score | exp val   | peptide                |               |             |                     |                    |  |       |       |       |       |   |  |
|             |          |        |                   |         |       | P17050 NAGAB_HUMAN | Alpha-N-acetylgalactosaminidase                          | OS=Homo sapiens | GN=NAGA               | PE=1            | SV=2  |      |            |           |                        |               |             |                     |                    |  |       |       |       |       |   |  |
|             |          |        |                   |         |       | 305                | 315                                                      | 605.84          | 1209.66               | 1209.65         | 0.01  | 0    | 45         | 0.0019822 | K.INQDPLGIQGR.R        |               |             |                     |                    |  |       | 20    | 10    | 1     |   |  |
|             |          |        |                   |         |       | 335                | 344                                                      | 579.29          | 1156.56               | 1156.57         | -0.01 | 0    | 48         | 0.0012994 | K.ASALVFFSCR.T         |               |             |                     |                    |  |       | 22    |       |       |   |  |
| P24752      | 14%      | 264    | 5                 | 45456   | 9     | start AA           | end AA                                                   | m/z obs         | M obs                 | M calc          | delta | miss | pept score | exp val   | peptide                |               |             |                     |                    |  |       |       |       |       |   |  |
|             |          |        |                   |         |       | P24752 THIL_HUMAN  | Acetyl-CoA acetyltransferase, mitochondrial              | OS=Homo sapiens | GN=ACAT1              | PE=1            | SV=1  |      |            |           |                        |               |             |                     |                    |  |       |       |       |       |   |  |
|             |          |        |                   |         |       | 41                 | 49                                                       | 487.3           | 972.58                | 972.56          | 0.02  | 0    | 35         | 0.0296821 | K.EVVIVSATR.T          |               |             |                     |                    |  |       | 17.07 | 11    | 1     |   |  |
|             |          |        |                   |         |       | 67                 | 78                                                       | 600.36          | 1198.7                | 1198.69         | 0.01  | 0    | 80         | 8.34E-07  | K.LGSIAIQGAIK.A        |               |             |                     |                    |  |       | 20.41 |       |       |   |  |
|             |          |        |                   |         |       | 88                 | 105                                                      | 947.47          | 1892.93               | 1892.87         | 0.06  | 0    | 51         | 0.0004948 | K.EAYMGNVLQGGEGQAPTR.Q | Oxidation (M) |             |                     |                    |  |       |       | 19.37 |       |   |  |
|             |          |        |                   |         |       | 209                | 221                                                      | 772.84          | 1543.67               | 1543.69         | -0.02 | 0    | 67         | 1.47E-05  | R.NEQDAYAINSYTR.S      |               |             |                     |                    |  |       |       | 19.84 |       |   |  |
| 366         | 373      | 495.25 | 988.48            | 988.49  | -0.01 | 0                  | 37                                                       | 0.0154078       | K.MLEIDPQK.V          | Oxidation (M)   |       |      |            |           |                        |               |             | 16.45               |                    |  |       |       |       |       |   |  |
| P00505      | 14%      | 251    | 5                 | 47844   | 9.1   | start AA           | end AA                                                   | m/z obs         | M obs                 | M calc          | delta | miss | pept score | exp val   | peptide                |               |             |                     |                    |  |       |       |       |       |   |  |
|             |          |        |                   |         |       | P00505 AATM_HUMAN  | Aspartate aminotransferase, mitochondrial                | OS=Homo sapiens | GN=GOT2               | PE=1            | SV=2  |      |            |           |                        |               |             |                     |                    |  |       |       |       |       |   |  |
|             |          |        |                   |         |       | 108                | 122                                                      | 765.91          | 1529.8                | 1529.79         | 0.01  | 0    | 43         | 0.0029888 | K.ASALALGENSEVLK.S     |               |             |                     |                    |  |       |       | 20.63 | 11    | 1 |  |
|             |          |        |                   |         |       | 126                | 139                                                      | 725.42          | 1448.82               | 1448.8          | 0.02  | 0    | 38         | 0.0106478 | R.FVTYQTSIGTGALR.I     |               |             |                     |                    |  |       |       | 20.97 |       |   |  |
|             |          |        |                   |         |       | 140                | 147                                                      | 446.27          | 890.52                | 890.5           | 0.02  | 0    | 73         | 4.94E-06  | R.IGASFQRF.F           |               |             |                     |                    |  |       |       | 20.28 |       |   |  |
|             |          |        |                   |         |       | 171                | 180                                                      | 577.77          | 1153.52               | 1153.52         | 0     | 0    | 50         | 0.0006541 | R.DAGMQLQGYR.Y         | Oxidation (M) |             |                     |                    |  |       |       |       | 15.73 |   |  |
|             |          |        |                   |         |       | 326                | 337                                                      | 634.4           | 1266.78               | 1266.73         | 0.05  | 0    | 46         | 0.0015061 | R.IAAAILNTPDLR.K       |               |             |                     |                    |  |       |       |       | 21.02 |   |  |
| P21283      | 13%      | 238    | 6                 | 44085   | 7     | start AA           | end AA                                                   | m/z obs         | M obs                 | M calc          | delta | miss | pept score | exp val   | peptide                |               |             |                     |                    |  |       |       |       |       |   |  |
|             |          |        |                   |         |       | P21283 VATC1_HUMAN | Vacuolar proton pump subunit C1                          | OS=Homo sapiens | GN=ATP6V1C1           | PE=1            | SV=4  |      |            |           |                        |               |             |                     |                    |  |       |       |       |       |   |  |
|             |          |        |                   |         |       | 29                 | 37                                                       | 480.77          | 959.52                | 959.5           | 0.01  | 0    | 39         | 0.0115622 | K.NNNLAVTSK.F          |               |             |                     |                    |  |       |       | 13.37 | 11    | 1 |  |
|             |          |        |                   |         |       | 38                 | 44                                                       | 423.75          | 845.48                | 845.46          | 0.01  | 0    | 51         | 0.0007999 | K.FNIPDLK.V            |               |             |                     |                    |  |       |       | 21.1  |       |   |  |
|             |          |        |                   |         |       | 128                | 137                                                      | 551.8           | 1101.59               | 1101.57         | 0.02  | 0    | 36         | 0.0215224 | K.GVTQIDNDLK.S         |               |             |                     |                    |  |       |       | 18.44 |       |   |  |
|             |          |        |                   |         |       | 148                | 155                                                      | 472.25          | 942.49                | 942.49          | 0     | 0    | 47         | 0.0017348 | K.GNLQNLER.K           |               |             |                     |                    |  |       |       | 15.08 |       |   |  |
|             |          |        |                   |         |       | 302                | 309                                                      | 474.79          | 947.56                | 947.54          | 0.02  | 0    | 33         | 0.0425155 | R.VFVESVLR.Y           |               |             |                     |                    |  |       |       | 20.84 |       |   |  |
| 374         | 382      | 576.31 | 1150.61           | 1150.57 | 0.04  | 0                  | 33                                                       | 0.0360602       | K.IDCNLLEFK.-         |                 |       |      |            |           |                        |               |             | 21.58               |                    |  |       |       |       |       |   |  |
| O94905      | 12%      | 148    | 3                 | 38044   | 5.5   | start AA           | end AA                                                   | m/z obs         | M obs                 | M calc          | delta | miss | pept score | exp val   | peptide                |               |             |                     |                    |  |       |       |       |       |   |  |
|             |          |        |                   |         |       | O94905 ERLN2_HUMAN | Erlin-2                                                  | OS=Homo sapiens | GN=ERLN2              | PE=1            | SV=1  |      |            |           |                        |               |             |                     |                    |  |       |       |       |       |   |  |
|             |          |        |                   |         |       | 61                 | 72                                                       | 674.9           | 1347.79               | 1347.69         | 0.1   | 0    | 45         | 0.0024829 | K.SVQTLTQDEVK.N        |               |             |                     |                    |  |       |       | 17.34 | 11    | 1 |  |
|             |          |        |                   |         |       | 221                | 232                                                      | 653.86          | 1305.7                | 1305.69         | 0.01  | 0    | 71         | 5.73E-06  | K.VAQVAEITYGQK.V       |               |             |                     |                    |  |       |       | 19.5  |       |   |  |
| 300         | 314      | 815.86 | 1629.71           | 1629.7  | 0.01  | 0                  | 32                                                       | 0.0420166       | K.DIPNMFMSDAGSVSK.Q   | 2 Oxidation (M) |       |      |            |           |                        |               |             | 20.15               |                    |  |       |       |       |       |   |  |
| Q9UJZ1      | 10%      | 149    | 3                 | 38624   | 6.9   | start AA           | end AA                                                   | m/z obs         | M obs                 | M calc          | delta | miss | pept score | exp val   | peptide                |               |             |                     |                    |  |       |       |       |       |   |  |
|             |          |        |                   |         |       | Q9UJZ1 STML2_HUMAN | Stomatin-like protein 2                                  | OS=Homo sapiens | GN=STOML2             | PE=1            | SV=1  |      |            |           |                        |               |             |                     |                    |  |       |       |       |       |   |  |
|             |          |        |                   |         |       | 202                | 211                                                      | 531.79          | 1061.56               | 1061.54         | 0.02  | 0    | 39         | 0.0117811 | R.ATVLESEGR.E          |               |             |                     |                    |  |       |       | 14.3  | 11    | 1 |  |
|             |          |        |                   |         |       | 212                | 221                                                      | 509.28          | 1016.54               | 1016.51         | 0.03  | 0    | 45         | 0.0026962 | R.ESAINVAEK.K          |               |             |                     |                    |  |       |       | 15.78 |       |   |  |
| 322         | 337      | 758    | 1513.99           | 1513.74 | 0.25  | 0                  | 66                                                       | 1.77E-05        | K.APVPGTPDLSLSSGSSR.D |                 |       |      |            |           |                        |               |             | 17.24               |                    |  |       |       |       |       |   |  |
| P10319      | 6%       | 89     | 2                 | 40597   | 5.9   | start AA           | end AA                                                   | m/z obs         | M obs                 | M calc          | delta | miss | pept score | exp val   | peptide                |               |             |                     |                    |  |       |       |       |       |   |  |
|             |          |        |                   |         |       | P10319 B58_HUMAN   | HLA class I histocompatibility antigen, B-58 alpha chain | OS=Homo sapiens | GN=HLA-B              | PE=2            | SV=1  |      |            |           |                        |               |             |                     |                    |  |       |       |       |       |   |  |
|             |          |        |                   |         |       | 46                 | 59                                                       | 815.45          | 1628.89               | 1628.82         | 0.07  | 0    | 48         | 0.0011831 | R.FIAGVYDDTQFVR.F      |               |             |                     |                    |  |       |       | 21.8  | 11    | 1 |  |
| 60          | 68       | 483.23 | 964.45            | 964.43  | 0.02  | 0                  | 42                                                       | 0.005244        | R.FDSDAASPR.T         |                 |       |      |            |           |                        |               |             | 13.47               |                    |  |       |       |       |       |   |  |
| P61160      | 6%       | 92     | 2                 | 45017   | 6.3   | start AA           | end AA                                                   | m/z obs         | M obs                 | M calc          | delta | miss | pept score | exp val   | peptide                |               |             |                     |                    |  |       |       |       |       |   |  |
|             |          |        |                   |         |       | P61160 ARP2_HUMAN  | Actin-related protein 2                                  | OS=Homo sapiens | GN=ACTR2              | PE=1            | SV=1  |      |            |           |                        |               |             |                     |                    |  |       |       |       |       |   |  |
|             |          |        |                   |         |       | 54                 | 65                                                       | 675.82          | 1349.62               | 1349.61         | 0.01  | 0    | 53         | 0.0003347 | K.DLMVGDEASELR.S       | Oxidation (M) |             |                     |                    |  |       |       | 20.45 | 11    | 1 |  |
| 107         | 118      | 685.39 | 1368.76           | 1368.73 | 0.02  | 0                  | 38                                                       | 0.0098785       | K.ILLTEPPMNPKN.N      | Oxidation (M)   |       |      |            |           |                        |               |             | 19.97               |                    |  |       |       |       |       |   |  |
| P04075      | 9%       | 187    | 3                 | 39851   | 8.3   | start AA           | end AA                                                   | m/z obs         | M obs                 | M calc          | delta | miss | pept score | exp val   | peptide                |               |             |                     |                    |  |       |       |       |       |   |  |
|             |          |        |                   |         |       | P04075 ALDOA_HUMAN | Fructose-bisphosphate aldolase A                         | OS=Homo sapiens | GN=ALDOA              | PE=1            | SV=2  |      |            |           |                        |               |             |                     |                    |  |       |       |       |       |   |  |
|             |          |        |                   |         |       | 29                 | 42                                                       | 666.88          | 1331.74               | 1331.69         | 0.04  | 0    | 63         | 4.18E-05  | K.GILAADESTGSIK.R      |               |             |                     |                    |  |       |       | 19.7  | 12    | 2 |  |
|             |          |        |                   |         |       | 61                 | 69                                                       | 522.8           | 1043.59               | 1043.56         | 0.02  | 0    | 51         | 0.0006809 | R.QLLLTADDR.V          |               |             |                     |                    |  |       |       | 20.09 |       |   |  |
| 332         | 342      | 566.8  | 1131.59           | 1131.57 | 0.02  | 0                  | 74                                                       | 3.05E-06        | R.ALANSLACQK.G        |                 |       |      |            |           |                        |               |             | 14.57               |                    |  |       |       |       |       |   |  |
| P61421      | 8%       | 151    | 3                 | 40759   | 4.9   | start AA           | end AA                                                   | m/z obs         | M obs                 | M calc          | delta | miss | pept score | exp val   | peptide                |               |             |                     |                    |  |       |       |       |       |   |  |
|             |          |        |                   |         |       | P61421 VAOD1_HUMAN | Vacuolar proton pump subunit d1                          | OS=Homo sapiens | GN=ATP6V0D1           | PE=1            | SV=1  |      |            |           |                        |               |             |                     |                    |  |       |       |       |       |   |  |
|             |          |        |                   |         |       | 121                | 128                                                      | 428.77          | 855.53                | 855.51          | 0.03  | 0    | 40         | 0.0078098 | R.SIAELVPK.C           |               |             |                     |                    |  |       |       | 20.43 | 12    | 2 |  |
|             |          |        |                   |         |       | 188                | 195                                                      | 510.76          | 1019.5                | 1019.5          | 0.01  | 0    | 34         | 0.0348471 | K.AYLESFYK.F           |               |             |                     |                    |  |       |       | 20.78 |       |   |  |
|             |          |        |                   |         |       | 276                | 288                                                      | 652.85          | 1303.69               | 1303.64         | 0.05  | 0    | 77         | 1.51E-06  | K.LLFEGAGSNPGDK.T      |               |             |                     |                    |  |       |       |       | 20.3  |   |  |
| accession # | coverage | score  | distinct peptides | mass    | pl    | start AA           | end AA                                                   | m/z obs         | M obs                 | M calc          | delta | miss | pept score | exp val   | peptide                | modifications | retent time | Strongest gel slice | # gel slices found |  |       |       |       |       |   |  |



|             |          |       |                   |       |     |                                                                                                                      |        |         |         |         |         |       |            |         |           |                        |                         |                     |                    |   |
|-------------|----------|-------|-------------------|-------|-----|----------------------------------------------------------------------------------------------------------------------|--------|---------|---------|---------|---------|-------|------------|---------|-----------|------------------------|-------------------------|---------------------|--------------------|---|
| P62873      | 10%      | 115   | 3                 | 38151 | 5.6 | P62873 GBB1_HUMAN Guanine nucleotide-binding protein G(I)/G(S)/G(T) subunit beta-1 OS=Homo sapiens GN=GNB1 PE=1 SV=3 | 2      | 15      | 864.97  | 1727.92 | 1727.87 | 0.05  | 1          | 43      | 0.0029985 | M.SELDQLRQEAELQK.N     | Acetyl (Protein N-term) | 22.23               | 14                 | 1 |
|             |          |       |                   |       |     |                                                                                                                      | 69     | 78      | 509.4   | 1016.79 | 1016.55 | 0.24  | 0          | 36      | 0.0107638 | R.LLVASASQDGK.L        |                         | 15.15               |                    |   |
|             |          |       |                   |       |     |                                                                                                                      | 305    | 314     | 505.25  | 1008.49 | 1008.51 | -0.02 | 0          | 35      | 0.0190476 | R.AGVLAGHDNR.V         |                         | 12.79               |                    |   |
| accession # | coverage | score | distinct peptides | mass  | pl  | start AA                                                                                                             | end AA | m/z obs | M obs   | M calc  | delta   | miss  | pept score | exp val | peptide   | modifications          | retent time             | Strongest gel slice | # gel slices found |   |
| P02649      | 8%       | 83    | 2                 | 36246 | 5.7 | P02649 APOE_HUMAN Apolipoprotein E OS=Homo sapiens GN=APOE PE=1 SV=1                                                 | 199    | 207     | 484.81  | 967.61  | 967.55  | 0.06  | 0          | 50      | 0.0007102 | R.LGPLVEQGR.V          |                         | 18.05               | 14                 | 1 |
|             |          |       |                   |       |     |                                                                                                                      | 301    | 317     | 810.93  | 1619.85 | 1619.79 | 0.06  | 0          | 33      | 0.0322664 | K.VQAAVGTSAAPVPSDNH.-  |                         | 15.36               |                    |   |
| accession # | coverage | score | distinct peptides | mass  | pl  | start AA                                                                                                             | end AA | m/z obs | M obs   | M calc  | delta   | miss  | pept score | exp val | peptide   | modifications          | retent time             | Strongest gel slice | # gel slices found |   |
| P45880      | 7%       | 114   | 2                 | 32060 | 7.5 | P45880 VDAC2_HUMAN Voltage-dependent anion-selective channel protein 2 OS=Homo sapiens GN=VDAC2 PE=1 SV=2            | 236    | 247     | 647.37  | 1292.72 | 1292.66 | 0.06  | 0          | 61      | 5.82E-05  | K.YQLDPTASISAK.V       |                         | 20.23               | 14                 | 3 |
|             |          |       |                   |       |     |                                                                                                                      | 268    | 277     | 508.82  | 1015.62 | 1015.59 | 0.02  | 0          | 53      | 0.0004284 | K.LTLSALVDGK.S         |                         | 21.49               |                    |   |
| accession # | coverage | score | distinct peptides | mass  | pl  | start AA                                                                                                             | end AA | m/z obs | M obs   | M calc  | delta   | miss  | pept score | exp val | peptide   | modifications          | retent time             | Strongest gel slice | # gel slices found |   |
| Q86Y82      | 7%       | 74    | 2                 | 31736 | 5.5 | Q86Y82 STX12_HUMAN Syntaxin-12 OS=Homo sapiens GN=STX12 PE=1 SV=1                                                    | 11     | 20      | 511.78  | 1021.55 | 1021.53 | 0.02  | 0          | 41      | 0.0056241 | R.NPGPSGPQLR.D         |                         | 14.02               | 14                 | 2 |
|             |          |       |                   |       |     |                                                                                                                      | 36     | 44      | 480.29  | 958.56  | 958.54  | 0.02  | 0          | 33      | 0.0466647 | R.ISQATAQIK.N          |                         | 13.42               |                    |   |
| accession # | coverage | score | distinct peptides | mass  | pl  | start AA                                                                                                             | end AA | m/z obs | M obs   | M calc  | delta   | miss  | pept score | exp val | peptide   | modifications          | retent time             | Strongest gel slice | # gel slices found |   |
| P11177      | 6%       | 96    | 2                 | 39550 | 6.2 | P11177 ODPB_HUMAN Pyruvate dehydrogenase E1 component subunit beta, mitochondrial OS=Homo sapiens GN=PDHB PE=1 SV=3  | 325    | 336     | 632.85  | 1263.69 | 1263.62 | 0.07  | 0          | 46      | 0.0018793 | R.VTGADVPMPYAK.I       | Oxidation (M)           | 17.85               | 14                 | 1 |
|             |          |       |                   |       |     |                                                                                                                      | 337    | 347     | 628.36  | 1254.7  | 1254.68 | 0.02  | 0          | 51      | 0.0005925 | K.ILEDNSIPQVK.D        |                         | 20.01               |                    |   |
| accession # | coverage | score | distinct peptides | mass  | pl  | start AA                                                                                                             | end AA | m/z obs | M obs   | M calc  | delta   | miss  | pept score | exp val | peptide   | modifications          | retent time             | Strongest gel slice | # gel slices found |   |
| A6NMY6      | 6%       | 81    | 2                 | 38806 | 6.5 | A6NMY6 AXA2L_HUMAN Putative annexin A2-like protein OS=Homo sapiens GN=AXA2P2 PE=5 SV=2                              | 105    | 115     | 611.82  | 1221.63 | 1221.59 | 0.04  | 0          | 36      | 0.0191828 | R.TPAQYDASELK.A        |                         | 16.45               | 14                 | 1 |
|             |          |       |                   |       |     |                                                                                                                      | 136    | 145     | 622.83  | 1243.65 | 1243.62 | 0.03  | 0          | 45      | 0.0023443 | R.TNQLQELN.R           |                         | 15.5                |                    |   |
| accession # | coverage | score | distinct peptides | mass  | pl  | start AA                                                                                                             | end AA | m/z obs | M obs   | M calc  | delta   | miss  | pept score | exp val | peptide   | modifications          | retent time             | Strongest gel slice | # gel slices found |   |
| Q9BWM7      | 6%       | 121   | 2                 | 35823 | 9.3 | Q9BWM7 SFXN3_HUMAN Sideroflexin-3 OS=Homo sapiens GN=SFXN3 PE=2 SV=1                                                 | 136    | 144     | 473.26  | 944.51  | 944.49  | 0.02  | 0          | 69      | 1.15E-05  | R.SGDTPTIVR.Q          |                         | 14.72               | 14                 | 1 |
|             |          |       |                   |       |     |                                                                                                                      | 214    | 222     | 455.27  | 908.53  | 908.5   | 0.03  | 0          | 52      | 0.0004401 | R.LGYSVTAAK.Q          |                         | 15.63               |                    |   |
| accession # | coverage | score | distinct peptides | mass  | pl  | start AA                                                                                                             | end AA | m/z obs | M obs   | M calc  | delta   | miss  | pept score | exp val | peptide   | modifications          | retent time             | Strongest gel slice | # gel slices found |   |
| P50897      | 14%      | 230   | 3                 | 34627 | 6.1 | P50897 PPT1_HUMAN Palmitoyl-protein thioesterase 1 OS=Homo sapiens GN=PPT1 PE=1 SV=1                                 | 105    | 122     | 1009.48 | 2016.96 | 2016.95 | 0.01  | 0          | 107     | 1.19E-09  | K.LQQGYNAMGFSQQGQFLR.A | Oxidation (M)           | 20.76               | 15                 | 5 |
|             |          |       |                   |       |     |                                                                                                                      | 165    | 174     | 526.79  | 1051.56 | 1051.57 | -0.01 | 1          | 37      | 0.0133102 | R.KTLNAGAYS.K.V        |                         | 12.9                |                    |   |
|             |          |       |                   |       |     |                                                                                                                      | 254    | 268     | 897.48  | 1792.94 | 1792.88 | 0.06  | 0          | 86      | 1.70E-07  | K.ETIPLQETSLYTQDR.L    |                         | 20.81               |                    |   |
| accession # | coverage | score | distinct peptides | mass  | pl  | start AA                                                                                                             | end AA | m/z obs | M obs   | M calc  | delta   | miss  | pept score | exp val | peptide   | modifications          | retent time             | Strongest gel slice | # gel slices found |   |
| Q99623      | 13%      | 220   | 4                 | 33276 | 9.8 | Q99623 PHB2_HUMAN Prohibitin-2 OS=Homo sapiens GN=PHB2 PE=1 SV=2                                                     | 98     | 107     | 602.83  | 1203.65 | 1203.63 | 0.02  | 0          | 33      | 0.0432001 | K.DLQMVNISR.L.V        | Oxidation (M)           | 20.89               | 15                 | 1 |
|             |          |       |                   |       |     |                                                                                                                      | 148    | 157     | 589.35  | 1176.68 | 1176.63 | 0.05  | 0          | 62      | 5.28E-05  | K.FNASQLITQR.A         |                         | 20.68               |                    |   |
|             |          |       |                   |       |     |                                                                                                                      | 158    | 165     | 450.28  | 898.55  | 898.56  | -0.01 | 0          | 42      | 0.0044137 | R.AQVSLIIR.R           |                         | 20.59               |                    |   |
|             |          |       |                   |       |     |                                                                                                                      | 225    | 236     | 608.33  | 1214.64 | 1214.61 | 0.03  | 0          | 84      | 3.53E-07  | K.IVQAEGEAAAK.M        |                         | 13.47               |                    |   |
| accession # | coverage | score | distinct peptides | mass  | pl  | start AA                                                                                                             | end AA | m/z obs | M obs   | M calc  | delta   | miss  | pept score | exp val | peptide   | modifications          | retent time             | Strongest gel slice | # gel slices found |   |
| Q9UBR2      | 11%      | 141   | 3                 | 34530 | 6.7 | Q9UBR2 CATZ_HUMAN Cathepsin Z OS=Homo sapiens GN=CATSZ PE=1 SV=1                                                     | 70     | 81      | 654.84  | 1307.67 | 1307.65 | 0.02  | 0          | 47      | 0.0013142 | R.NVDGVNYASITR.N       |                         | 19.98               | 15                 | 2 |
|             |          |       |                   |       |     |                                                                                                                      | 190    | 199     | 505.75  | 1009.49 | 1009.48 | 0.01  | 0          | 56      | 0.000165  | R.VGDYGLSGR.E          |                         | 15.85               |                    |   |
|             |          |       |                   |       |     |                                                                                                                      | 275    | 284     | 371.22  | 1110.62 | 1110.59 | 0.03  | 1          | 38      | 0.0104194 | R.IVTSTYKDGK.G         |                         | 12.84               |                    |   |
| accession # | coverage | score | distinct peptides | mass  | pl  | start AA                                                                                                             | end AA | m/z obs | M obs   | M calc  | delta   | miss  | pept score | exp val | peptide   | modifications          | retent time             | Strongest gel slice | # gel slices found |   |
| Q9H9B4      | 7%       | 88    | 2                 | 35881 | 9.2 | Q9H9B4 SFXN1_HUMAN Sideroflexin-1 OS=Homo sapiens GN=SFXN1 PE=1 SV=4                                                 | 203    | 214     | 635.82  | 1269.62 | 1269.63 | -0.01 | 0          | 48      | 0.0011554 | K.VGIPVTDENGNR.L       |                         | 17.02               | 15                 | 1 |
|             |          |       |                   |       |     |                                                                                                                      | 224    | 233     | 550.84  | 1099.67 | 1099.63 | 0.04  | 0          | 40      | 0.0092409 | K.QAITQVVVSR.I         |                         | 18.9                |                    |   |
| accession # | coverage | score | distinct peptides | mass  | pl  | start AA                                                                                                             | end AA | m/z obs | M obs   | M calc  | delta   | miss  | pept score | exp val | peptide   | modifications          | retent time             | Strongest gel slice | # gel slices found |   |
| P36543      | 18%      | 184   | 4                 | 26186 | 7.7 | P36543 VATE1_HUMAN Vacuolar proton pump subunit E 1 OS=Homo sapiens GN=ATP6V1E1 PE=1 SV=1                            | 34     | 42      | 554.77  | 1107.52 | 1107.51 | 0.02  | 0          | 43      | 0.0033961 | K.AEEEFNIEK.G          |                         | 19.49               | 16                 | 1 |
|             |          |       |                   |       |     |                                                                                                                      | 70     | 80      | 669.32  | 1336.63 | 1336.62 | 0.01  | 0          | 64      | 2.55E-05  | K.IQMSNLNMQAR.L        | 2 Oxidation (M)         | 13.33               |                    |   |
|             |          |       |                   |       |     |                                                                                                                      | 138    | 145     | 487.78  | 973.54  | 973.56  | -0.02 | 1          | 37      | 0.0175302 | R.KQDFPLVK.A           |                         | 17.74               |                    |   |
|             |          |       |                   |       |     |                                                                                                                      | 200    | 212     | 788.42  | 1574.83 | 1574.78 | 0.05  | 0          | 39      | 0.0085972 | R.LDLIAQGMPEVR.G       | 2 Oxidation (M)         | 20.4                |                    |   |
| accession # | coverage | score | distinct peptides | mass  | pl  | start AA                                                                                                             | end AA | m/z obs | M obs   | M calc  | delta   | miss  | pept score | exp val | peptide   | modifications          | retent time             | Strongest gel slice | # gel slices found |   |
| Q16698      | 14%      | 249   | 4                 | 36330 | 9.3 | Q16698 DECR_HUMAN 2,4-dienoyl-CoA reductase, mitochondrial OS=Homo sapiens GN=DECR1 PE=1 SV=1                        | 50     | 60      | 603.31  | 1204.6  | 1204.59 | 0.01  | 0          | 54      | 0.0003123 | K.AMLPPNSFQGV.V        | Oxidation (M)           | 16.77               | 16                 | 1 |
|             |          |       |                   |       |     |                                                                                                                      | 61     | 73      | 589.34  | 1176.67 | 1176.65 | 0.02  | 0          | 57      | 0.0001565 | K.VAFITGGGTGLGK.G      |                         | 20.45               |                    |   |
|             |          |       |                   |       |     |                                                                                                                      | 98     | 110     | 667.83  | 1333.65 | 1333.65 | 0     | 0          | 95      | 2.11E-08  | K.ATAEQISSQTGNK.V      |                         | 13.16               |                    |   |
|             |          |       |                   |       |     |                                                                                                                      | 235    | 244     | 556.83  | 1111.65 | 1111.64 | 0.02  | 0          | 43      | 0.0030331 | R.FNVIQPGPIK.T         |                         | 20.49               |                    |   |
| accession # | coverage | score | distinct peptides | mass  | pl  | start AA                                                                                                             | end AA | m/z obs | M obs   | M calc  | delta   | miss  | pept score | exp val | peptide   | modifications          | retent time             | Strongest gel slice | # gel slices found |   |
| P21796      | 13%      | 247   | 4                 | 30868 | 8.6 | P21796 VDAC1_HUMAN Voltage-dependent anion-selective channel protein 1 OS=Homo sapiens GN=VDAC1 PE=1 SV=2            | 2      | 12      | 587.31  | 1172.61 | 1172.61 | 0.01  | 0          | 61      | 6.30E-05  | M.AVPPTYADLGK.S        | Acetyl (Protein N-term) | 21.1                | 16                 | 5 |
|             |          |       |                   |       |     |                                                                                                                      | 97     | 109     | 700.83  | 1399.66 | 1399.66 | -0.01 | 0          | 74      | 2.73E-06  | K.LTFDSSFSPNTGK.K      |                         | 20.75               |                    |   |
|             |          |       |                   |       |     |                                                                                                                      | 97     | 110     | 510.27  | 1527.77 | 1527.76 | 0.02  | 1          | 56      | 0.0001881 | K.LTFDSSFSPNTGKK.N     |                         | 20.06               |                    |   |
|             |          |       |                   |       |     |                                                                                                                      | 164    | 174     | 607.32  | 1212.62 | 1212.61 | 0.01  | 0          | 56      | 0.0001914 | R.VTQSNFAVGYK.T        |                         | 19.28               |                    |   |
| accession # | coverage | score | distinct peptides | mass  | pl  | start AA                                                                                                             | end AA | m/z obs | M obs   | M calc  | delta   | miss  | pept score | exp val | peptide   | modifications          | retent time             | Strongest gel slice | # gel slices found |   |
| P05141      | 13%      | 177   | 4                 | 33102 | 9.8 | P05141 ADT2_HUMAN ADP/ATP translocase 2 OS=Homo sapiens GN=SLC25A5 PE=1 SV=6                                         | 2      | 10      | 476.25  | 950.48  | 950.47  | 0.01  | 0          | 58      | 0.0001128 | M.TDAAVSFAK.D          | Acetyl (Protein N-term) | 20.45               | 17                 | 1 |



| accession # | coverage | score | distinct peptides | mass  | pl  | start AA | end AA | m/z obs | M obs   | M calc  | delta | miss | pept score | exp val   | peptide                | modifications | retent time | Strongest gel slice | # gel slices found |
|-------------|----------|-------|-------------------|-------|-----|----------|--------|---------|---------|---------|-------|------|------------|-----------|------------------------|---------------|-------------|---------------------|--------------------|
| P35232      | 11%      | 143   | 3                 | 29843 | 5.6 | 11       | 23     | 610.34  | 1218.66 | 1218.66 | 0     | 0    | 42         | 0.0041955 | K.DFLAGGVAIAISK.T      |               | 21.71       |                     |                    |
|             |          |       |                   |       |     | 24       | 31     | 428.75  | 855.49  | 855.48  | 0.01  | 0    | 38         | 0.0107068 | K.TAVAPIER.V           |               | 13.98       |                     |                    |
|             |          |       |                   |       |     | 97       | 105    | 488.78  | 975.54  | 975.54  | 0     | 0    | 42         | 0.0050695 | K.QIFLGGVDK.R          |               | 20.5        |                     |                    |
|             |          |       |                   |       |     | 134      | 143    | 575.29  | 1148.57 | 1148.58 | -0.02 | 0    | 63         | 3.33E-05  | R.FDAGELITQR.E         |               | 20.98       |                     |                    |
| P07858      | 6%       | 78    | 2                 | 38766 | 5.9 | 178      | 186    | 512.23  | 1022.45 | 1022.49 | -0.04 | 0    | 37         | 0.0125422 | K.EFTEAVEAK.Q          |               | 15.5        |                     |                    |
|             |          |       |                   |       |     | 209      | 219    | 531.27  | 1060.53 | 1060.54 | -0.01 | 0    | 43         | 0.0036911 | K.AAISAEGDSK.A         |               | 14.33       |                     |                    |
|             |          |       |                   |       |     | 210      | 220    | 657.78  | 1313.55 | 1313.6  | -0.04 | 0    | 38         | 0.0107862 | K.ICEPGYSPTYK.Q        |               | 17.55       |                     |                    |
|             |          |       |                   |       |     | 238      | 245    | 499.74  | 997.48  | 997.48  | 0     | 0    | 41         | 0.0054135 | K.DIMAEIYK.N           | Oxidation (M) | 19.8        |                     |                    |
| P07339      | 13%      | 225   | 5                 | 45037 | 6.1 | 177      | 184    | 440.23  | 878.45  | 878.45  | 0     | 0    | 34         | 0.0289497 | R.QVFGEATK.Q           |               | 14.15       |                     |                    |
|             |          |       |                   |       |     | 185      | 194    | 523.31  | 1044.6  | 1044.6  | 0     | 0    | 66         | 2.04E-05  | K.QPGITFIAAK.F         |               | 20.44       |                     |                    |
|             |          |       |                   |       |     | 236      | 253    | 902.47  | 1802.93 | 1802.8  | 0.14  | 0    | 36         | 0.0163537 | R.DPDAQPGGELMLGGTDSK.Y | Oxidation (M) | 19.92       |                     |                    |
|             |          |       |                   |       |     | 349      | 357    | 533.28  | 1064.56 | 1064.54 | 0.02  | 0    | 52         | 0.0004309 | K.LSPEDYTLK.V          |               | 20.05       |                     |                    |
|             |          |       |                   |       |     | 404      | 411    | 410.71  | 819.4   | 819.42  | -0.03 | 0    | 36         | 0.019251  | R.VGFAEAAAR.L          |               | 14.99       |                     |                    |
|             |          |       |                   |       |     | 185      | 194    | 523.31  | 1044.6  | 1044.6  | 0     | 0    | 66         | 2.04E-05  | K.QPGITFIAAK.F         |               | 20.44       |                     |                    |
| P07686      | 4%       | 105   | 2                 | 63527 | 6.3 | 426      | 435    | 583.77  | 1165.52 | 1165.53 | -0.01 | 0    | 55         | 0.0002214 | K.DSAYPEELSR.V         |               | 18.95       |                     |                    |
|             |          |       |                   |       |     | 466      | 476    | 595.82  | 1189.63 | 1189.6  | 0.03  | 0    | 51         | 0.0005744 | K.VEPLDFGGTQK.Q        |               | 20.35       |                     |                    |
|             |          |       |                   |       |     | 177      | 184    | 440.23  | 878.45  | 878.45  | 0     | 0    | 34         | 0.0289497 | R.QVFGEATK.Q           |               | 14.15       |                     |                    |
| P04792      | 15%      | 158   | 3                 | 22826 | 6   | 28       | 37     | 582.31  | 1162.6  | 1162.61 | -0.01 | 0    | 54         | 0.0003169 | R.LFDQAFGLPL.R         |               | 21.83       |                     |                    |
|             |          |       |                   |       |     | 80       | 89     | 538.27  | 1074.52 | 1074.57 | -0.04 | 0    | 70         | 8.49E-06  | R.QLSSGVSEIR.H         |               | 15.99       |                     |                    |
|             |          |       |                   |       |     | 189      | 198    | 471.25  | 940.48  | 940.5   | -0.01 | 0    | 36         | 0.0168065 | R.AQLGGPEAAK.S         |               | 13.23       |                     |                    |
|             |          |       |                   |       |     | 131      | 147    | 901.4   | 1800.79 | 1800.81 | -0.02 | 0    | 68         | 1.01E-05  | R.LVAGEMQNEPDDGGGQR.G  | Oxidation (M) | 13.43       |                     |                    |
| Q99714      | 11%      | 112   | 2                 | 27134 | 7.7 | 173      | 184    | 600.86  | 1199.71 | 1199.67 | 0.04  | 0    | 43         | 0.0035429 | K.GGIVGMTLIAR.D        | Oxidation (M) | 20.61       |                     |                    |
|             |          |       |                   |       |     | 24       | 34     | 543.31  | 1084.61 | 1084.65 | -0.04 | 0    | 61         | 6.98E-05  | K.LVLLGESAVGK.S        |               | 20.68       |                     |                    |
|             |          |       |                   |       |     | 122      | 135    | 698.42  | 1394.82 | 1394.79 | 0.04  | 0    | 71         | 4.71E-06  | R.QASPNVIALAGNK.A      |               | 21.16       |                     |                    |
|             |          |       |                   |       |     | 185      | 196    | 606.29  | 1210.56 | 1210.57 | -0.01 | 0    | 58         | 0.0001026 | K.NEPQNTGAPGR.N        |               | 12.66       |                     |                    |
| P51148      | 23%      | 254   | 4                 | 23696 | 8.6 | 199      | 210    | 650.31  | 1298.6  | 1298.62 | -0.03 | 0    | 64         | 2.62E-05  | R.GVDLQENNPASR.S       |               | 14.93       |                     |                    |
|             |          |       |                   |       |     | 152      | 164    | 712.34  | 1422.66 | 1422.74 | -0.08 | 0    | 35         | 0.0222882 | R.NPNLPPETVDSLK.N      |               | 19.99       |                     |                    |
|             |          |       |                   |       |     | 177      | 187    | 654.79  | 1307.57 | 1307.58 | -0.02 | 0    | 51         | 0.0005938 | K.MTYTDQVNCPLK.L       | Oxidation (M) | 13.65       |                     |                    |
|             |          |       |                   |       |     | 122      | 135    | 698.42  | 1394.82 | 1394.79 | 0.04  | 0    | 71         | 4.71E-06  | R.QASPNVIALAGNK.A      |               | 21.16       |                     |                    |
| P05090      | 13%      | 111   | 2                 | 21547 | 5.1 | 152      | 164    | 712.34  | 1422.66 | 1422.74 | -0.08 | 0    | 35         | 0.0222882 | R.NPNLPPETVDSLK.N      |               | 19.99       |                     |                    |
|             |          |       |                   |       |     | 177      | 187    | 654.79  | 1307.57 | 1307.58 | -0.02 | 0    | 51         | 0.0005938 | K.MTYTDQVNCPLK.L       | Oxidation (M) | 13.65       |                     |                    |
|             |          |       |                   |       |     | 11       | 21     | 536.28  | 1070.55 | 1070.63 | -0.09 | 0    | 39         | 0.0108233 | K.LLLIGDSGVGK.S        |               | 22.04       |                     |                    |
|             |          |       |                   |       |     | 49       | 56     | 445.21  | 888.41  | 888.46  | -0.05 | 0    | 36         | 0.0250418 | R.TVEINGEK.V           |               | 13.99       |                     |                    |
| Q15286      | 15%      | 139   | 3                 | 23296 | 8.5 | 179      | 189    | 671.81  | 1341.66 | 1341.66 | -0.07 | 0    | 65         | 2.27E-05  | K.QQQQQQNDVVK.L        |               | 13.22       |                     |                    |
|             |          |       |                   |       |     | 11       | 21     | 536.28  | 1070.55 | 1070.63 | -0.09 | 0    | 39         | 0.0108233 | K.LLLIGDSGVGK.S        |               | 22.04       |                     |                    |
|             |          |       |                   |       |     | 49       | 56     | 445.21  | 888.41  | 888.46  | -0.05 | 0    | 36         | 0.0250418 | R.TVEINGEK.V           |               | 13.99       |                     |                    |
|             |          |       |                   |       |     | 179      | 189    | 671.81  | 1341.66 | 1341.66 | -0.07 | 0    | 65         | 2.27E-05  | K.QQQQQQNDVVK.L        |               | 13.22       |                     |                    |
| P51149      | 11%      | 81    | 2                 | 23760 | 6.4 | 11       | 21     | 529.27  | 1056.53 | 1056.62 | -0.09 | 0    | 49         | 0.0009742 | K.VIILGDSGVGK.T        |               | 21.34       |                     |                    |
|             |          |       |                   |       |     | 147      | 157    | 642.28  | 1282.54 | 1282.62 | -0.08 | 0    | 32         | 0.0431424 | K.NNIPYFETSAK.E        |               | 21.57       |                     |                    |
|             |          |       |                   |       |     | 11       | 21     | 529.27  | 1056.53 | 1056.62 | -0.09 | 0    | 49         | 0.0009742 | K.VIILGDSGVGK.T        |               | 21.34       |                     |                    |
| P48047      | 9%       | 78    | 2                 | 23377 | 10  | 91       | 98     | 431.2   | 860.38  | 860.46  | -0.08 | 0    | 35         | 0.0306123 | K.SLNDITAK.E           |               | 15.73       |                     |                    |
|             |          |       |                   |       |     | 177      | 188    | 637.79  | 1273.56 | 1273.67 | -0.11 | 0    | 43         | 0.0038488 | K.TDPSILGGMIVR.I       | Oxidation (M) | 21.88       |                     |                    |
|             |          |       |                   |       |     | 11       | 21     | 529.27  | 1056.53 | 1056.62 | -0.09 | 0    | 49         | 0.0009742 | K.VIILGDSGVGK.T        |               | 21.34       |                     |                    |
| P61026      | 9%       | 84    | 2                 | 22755 | 8.6 | 12       | 22     | 536.28  | 1070.55 | 1070.63 | -0.09 | 0    | 39         | 0.0108233 | K.LLLIGDSGVGK.T        |               | 22.04       |                     |                    |
|             |          |       |                   |       |     | 155      | 161    | 401.26  | 800.51  | 800.44  | 0.07  | 0    | 45         | 0.0031616 | K.ANINIEK.A            |               | 14.78       |                     |                    |
|             |          |       |                   |       |     | 12       | 22     | 536.28  | 1070.55 | 1070.63 | -0.09 | 0    | 39         | 0.0108233 | K.LLLIGDSGVGK.T        |               | 22.04       |                     |                    |
| P62820      | 9%       | 73    | 2                 | 22891 | 5.9 | 14       | 24     | 536.28  | 1070.55 | 1070.63 | -0.09 | 0    | 39         | 0.0108233 | K.LLLIGDSGVGK.S        |               | 22.04       |                     |                    |
|             |          |       |                   |       |     | 52       | 58     | 388.17  | 774.32  | 774.41  | -0.09 | 0    | 34         | 0.0392401 | R.TIELDGK.T            |               | 16.41       |                     |                    |
|             |          |       |                   |       |     | 14       | 24     | 536.28  | 1070.55 | 1070.63 | -0.09 | 0    | 39         | 0.0108233 | K.LLLIGDSGVGK.S        |               | 22.04       |                     |                    |
|             |          |       |                   |       |     | 52       | 58     | 388.17  | 774.32  | 774.41  | -0.09 | 0    | 34         | 0.0392401 | R.TIELDGK.T            |               | 16.41       |                     |                    |
| P30048      | 7%       | 86    | 2                 | 28017 | 7.7 | 74       | 83     | 511.23  | 1020.45 | 1020.52 | -0.07 | 0    | 36         | 0.0185379 | K.GTAVVNGFEK.D         |               | 17.15       |                     |                    |
|             |          |       |                   |       |     | 208      | 214    | 417.21  | 832.4   | 832.43  | -0.03 | 0    | 50         | 0.0008169 | R.SVEETLR.L            |               | 14.85       |                     |                    |
|             |          |       |                   |       |     | 74       | 83     | 511.23  | 1020.45 | 1020.52 | -0.07 | 0    | 36         | 0.0185379 | K.GTAVVNGFEK.D         |               | 17.15       |                     |                    |

| accession # | coverage | score | distinct peptides | mass   | pl  | start AA | end AA       | m/z obs                                                          | M obs           | M calc      | delta | miss | pept score | exp val   | peptide               | modifications                          | retent time | Strongest gel slice | # gel slices found |  |
|-------------|----------|-------|-------------------|--------|-----|----------|--------------|------------------------------------------------------------------|-----------------|-------------|-------|------|------------|-----------|-----------------------|----------------------------------------|-------------|---------------------|--------------------|--|
| P63000      | 10%      | 118   | 2                 | 21835  | 8.8 | P63000   | RAC1_HUMAN   | Ras-related C3 botulinum toxin substrate 1                       | OS=Homo sapiens | GN=RAC1     | PE=1  | SV=1 |            |           |                       |                                        |             |                     |                    |  |
|             |          |       |                   |        |     | 6        | 16           | 530.73                                                           | 1059.44         | 1059.54     | -0.1  | 0    | 54         | 0.0003733 | K.CVVVGDGAVGK.T       |                                        | 16.08       |                     | 1                  |  |
|             |          |       |                   |        |     | 167      | 174          | 475.72                                                           | 949.43          | 949.49      | -0.05 | 0    | 51         | 0.0005795 | K.TVDFEAIR.A          |                                        | 21.34       |                     |                    |  |
| Q9NVJ2      | 13%      | 159   | 3                 | 21753  | 8.7 | Q9NVJ2   | ARLBB_HUMAN  | ADP-ribosylation factor-like protein BB                          | OS=Homo sapiens | GN=ARLBB    | PE=1  | SV=1 |            |           |                       |                                        |             |                     |                    |  |
|             |          |       |                   |        |     | 1        | 7            | 431.21                                                           | 860.4           | 860.48      | -0.08 | 0    | 33         | 0.0499914 | .MLALISRL             | Acetyl (Protein N-term); Oxidation (M) | 23.17       |                     | 3                  |  |
|             |          |       |                   |        |     | 133      | 141          | 507.72                                                           | 1013.42         | 1013.5      | -0.08 | 0    | 48         | 0.0012279 | R.DLPNALDEK.Q         |                                        | 20.88       |                     |                    |  |
|             |          |       |                   |        |     | 147      | 155          | 532.23                                                           | 1062.44         | 1062.51     | -0.07 | 0    | 79         | 1.07E-06  | K.MNLSAIQDR.E         | Oxidation (M)                          | 16.11       |                     |                    |  |
| P23284      | 16%      | 136   | 3                 | 22785  | 9.3 | P23284   | PIIB_HUMAN   | Peptidyl-prolyl cis-trans isomerase B                            | OS=Homo sapiens | GN=PIIB     | PE=1  | SV=1 |            |           |                       |                                        |             |                     |                    |  |
|             |          |       |                   |        |     | 44       | 51           | 430.67                                                           | 859.34          | 859.4       | -0.07 | 0    | 35         | 0.0308716 | R.IGDEDVGR.V          |                                        | 14.18       |                     | 1                  |  |
|             |          |       |                   |        |     | 64       | 76           | 682.77                                                           | 1363.52         | 1363.7      | -0.18 | 0    | 68         | 1.12E-05  | K.TVDNFVALATGEK.G     |                                        | 22.85       |                     |                    |  |
|             |          |       |                   |        |     | 138      | 150          | 729.31                                                           | 1456.61         | 1456.72     | -0.11 | 0    | 35         | 0.025653  | K.DTNGSQFFITVK.T      |                                        | 22.65       |                     |                    |  |
| P30405      | 8%       | 81    | 2                 | 22368  | 9.5 | P30405   | PPIF_HUMAN   | Peptidyl-prolyl cis-trans isomerase, mitochondrial               | OS=Homo sapiens | GN=PPIF     | PE=1  | SV=1 |            |           |                       |                                        |             |                     |                    |  |
|             |          |       |                   |        |     | 125      | 133          | 555.73                                                           | 1109.44         | 1109.54     | -0.1  | 0    | 40         | 0.0070804 | R.FPDNFTLK.H          |                                        | 21.92       |                     | 1                  |  |
|             |          |       |                   |        |     | 183      | 190          | 448.2                                                            | 894.39          | 894.48      | -0.09 | 1    | 41         | 0.0049812 | K.KIESFGSK.S          |                                        | 14.05       |                     |                    |  |
| P61916      | 17%      | 119   | 3                 | 16902  | 7.6 | P61916   | NPCC2_HUMAN  | Epididymal secretory protein E1                                  | OS=Homo sapiens | GN=NPCC2    | PE=1  | SV=1 |            |           |                       |                                        |             |                     |                    |  |
|             |          |       |                   |        |     | 26       | 35           | 525.19                                                           | 1048.37         | 1048.49     | -0.12 | 0    | 36         | 0.0207675 | K.DCGSVDGVIK.E        |                                        | 18.41       |                     | 2                  |  |
|             |          |       |                   |        |     | 95       | 103          | 508.71                                                           | 1015.4          | 1015.51     | -0.11 | 0    | 48         | 0.0012975 | K.SGINCPIQK.D         |                                        | 14.71       |                     |                    |  |
|             |          |       |                   |        |     | 117      | 123          | 412.3                                                            | 822.59          | 822.41      | 0.17  | 0    | 35         | 0.0161095 | K.SEYPSIKL            |                                        | 16.43       |                     |                    |  |
| Q13488      | 8%       | 337   | 6                 | 93680  | 6.6 | Q13488   | PPP3_HUMAN   | Vacuolar proton translocating ATPase 116 kDa subunit a isoform 3 | OS=Homo sapiens | GN=TCIRG1   | PE=1  | SV=2 |            |           |                       |                                        |             |                     |                    |  |
|             |          |       |                   |        |     | 29       | 38           | 566.77                                                           | 1131.52         | 1131.63     | -0.11 | 0    | 67         | 1.62E-05  | R.LGELGLVEFR.D        |                                        | 23.32       |                     | 3                  |  |
|             |          |       |                   |        |     | 39       | 49           | 604.25                                                           | 1206.48         | 1206.6      | -0.12 | 0    | 66         | 1.66E-05  | R.DLNASVSAFQR.R       |                                        | 21.54       |                     |                    |  |
|             |          |       |                   |        |     | 64       | 73           | 635.25                                                           | 1268.49         | 1268.64     | -0.15 | 0    | 32         | 0.0416855 | K.TFTFLQEEVR.R        |                                        | 22.85       |                     |                    |  |
|             |          |       |                   |        |     | 75       | 83           | 446.24                                                           | 890.47          | 890.56      | -0.08 | 0    | 66         | 2.32E-05  | R.AGLVLPPP.K          |                                        | 20.49       |                     |                    |  |
|             |          |       |                   |        |     | 104      | 109          | 365.18                                                           | 728.34          | 728.42      | -0.08 | 0    | 40         | 0.0083247 | R.LAQELR.D            |                                        | 14.16       |                     |                    |  |
|             |          |       |                   |        |     | 134      | 151          | 625.57                                                           | 1873.68         | 1873.87     | -0.19 | 0    | 33         | 0.026909  | R.QGHEPQLAAHTDGASER.T |                                        | 13.78       |                     |                    |  |
| P10253      | 3%       | 126   | 2                 | 106126 | 5.6 | P10253   | LYAG_HUMAN   | Lysosomal alpha-glucosidase                                      | OS=Homo sapiens | GN=GAA      | PE=1  | SV=2 |            |           |                       |                                        |             |                     |                    |  |
|             |          |       |                   |        |     | 838      | 849          | 643.82                                                           | 1285.62         | 1285.71     | -0.09 | 0    | 57         | 0.0001472 | R.QQPMALVALTK.G       | Oxidation (M)                          | 21.36       |                     | 5                  |  |
|             |          |       |                   |        |     | 892      | 903          | 615.78                                                           | 1229.55         | 1229.66     | -0.11 | 0    | 69         | 8.97E-06  | R.VTSEGAGLQLQK.V      |                                        | 17.63       |                     |                    |  |
| O75348      | 21%      | 159   | 2                 | 13863  | 8.9 | O75348   | VATG1_HUMAN  | Vacuolar proton pump subunit G 1                                 | OS=Homo sapiens | GN=ATP6V1G1 | PE=1  | SV=3 |            |           |                       |                                        |             |                     |                    |  |
|             |          |       |                   |        |     | 2        | 17           | 913.89                                                           | 1825.76         | 1825.96     | -0.21 | 1    | 84         | 2.33E-07  | M.ASQSQGIQQLLQAEKR.A  | Acetyl (Protein N-term)                | 22.38       |                     | 1                  |  |
|             |          |       |                   |        |     | 81       | 89           | 594.74                                                           | 1187.47         | 1187.6      | -0.13 | 0    | 76         | 2.21E-06  | K.MTILQTYFR.Q         | Oxidation (M)                          | 22.92       |                     |                    |  |
| O00754      | 2%       | 84    | 2                 | 114357 | 6.8 | O00754   | MAN2B1_HUMAN | Lysosomal alpha-mannosidase                                      | OS=Homo sapiens | GN=MAN2B1   | PE=1  | SV=3 |            |           |                       |                                        |             |                     |                    |  |
|             |          |       |                   |        |     | 941      | 950          | 600.74                                                           | 1199.47         | 1199.62     | -0.14 | 0    | 51         | 0.0005849 | R.DLFSTFTITR.L        |                                        | 24.37       |                     | 2                  |  |
|             |          |       |                   |        |     | 951      | 962          | 693.3                                                            | 1384.59         | 1384.77     | -0.17 | 0    | 34         | 0.0267691 | R.LQETTLVANQLR.E      |                                        | 21.08       |                     |                    |  |
| Q13510      | 5%       | 88    | 2                 | 45077  | 7.5 | Q13510   | ASAH1_HUMAN  | Acid ceramidase                                                  | OS=Homo sapiens | GN=ASAH1    | PE=1  | SV=4 |            |           |                       |                                        |             |                     |                    |  |
|             |          |       |                   |        |     | 82       | 92           | 612.23                                                           | 1222.45         | 1222.6      | -0.15 | 0    | 32         | 0.0454359 | N.NMINTFVPSGK.V       | Oxidation (M)                          | 20.59       |                     | 1                  |  |
|             |          |       |                   |        |     | 93       | 100          | 482.18                                                           | 962.34          | 962.47      | -0.13 | 0    | 56         | 0.0001762 | K.VMQVVDEK.L          | Oxidation (M)                          | 13.61       |                     |                    |  |
| P02776      | 36%      | 234   | 3 (4)             | 11123  | 8.9 | P02776   | PLF4_HUMAN   | Platelet factor 4                                                | OS=Homo sapiens | GN=PF4      | PE=1  | SV=2 |            |           |                       |                                        |             |                     |                    |  |
|             |          |       |                   |        |     | 54       | 62           | 520.26                                                           | 1038.5          | 1038.61     | -0.11 | 0    | 54         | 0.0002956 | R.HITSLEVIK.A         |                                        | 19.39       |                     | 2                  |  |
|             |          |       |                   |        |     | 63       | 77           | 526.55                                                           | 1576.62         | 1576.84     | -0.22 | 0    | 72         | 4.00E-06  | K.AGPHCPTAQLIATLK.N   |                                        | 21.4        |                     |                    |  |
|             |          |       |                   |        |     | 82       | 92           | 667.27                                                           | 1332.52         | 1332.71     | -0.19 | 0    | 68         | 1.27E-05  | K.ICLDLQAPLYK.K       |                                        | 22.7        |                     |                    |  |
|             |          |       |                   |        |     | 82       | 93           | 487.87                                                           | 1460.6          | 1460.81     | -0.21 | 1    | 42         | 0.0044321 | K.ICLDLQAPLYK.K       |                                        | 21.83       |                     |                    |  |
| P56385      | 30%      | 92    | 2                 | 7928   | 9.3 | P56385   | ATP5I_HUMAN  | ATP synthase subunit e, mitochondrial                            | OS=Homo sapiens | GN=ATP5I    | PE=2  | SV=2 |            |           |                       |                                        |             |                     |                    |  |
|             |          |       |                   |        |     | 2        | 12           | 588.79                                                           | 1175.56         | 1175.73     | -0.16 | 0    | 51         | 0.0006969 | M.VPPVQVSLIK.L        |                                        | 21.53       |                     | 1                  |  |
|             |          |       |                   |        |     | 60       | 69           | 566.72                                                           | 1131.43         | 1131.57     | -0.14 | 0    | 41         | 0.0057141 | R.ELAEDDSILK.-        |                                        | 21          |                     |                    |  |
| P61604      | 60%      | 333   | 6                 | 10925  | 8.9 | P61604   | CH10_HUMAN   | 10 kDa heat shock protein, mitochondrial                         | OS=Homo sapiens | GN=HSP1     | PE=1  | SV=2 |            |           |                       |                                        |             |                     |                    |  |
|             |          |       |                   |        |     | 29       | 36           | 430.67                                                           | 859.33          | 859.45      | -0.12 | 0    | 64         | 3.55E-05  | K.GGIMLPEK.S          | Oxidation (M)                          | 18.99       |                     | 2                  |  |
|             |          |       |                   |        |     | 41       | 54           | 658.28                                                           | 1314.55         | 1314.75     | -0.21 | 0    | 77         | 1.41E-06  | K.VLGATVVAVGSGSK.G    |                                        | 20.18       |                     |                    |  |
|             |          |       |                   |        |     | 57       | 66           | 507.22                                                           | 1012.43         | 1012.56     | -0.12 | 0    | 42         | 0.0039916 | K.GGIEIQVSVK.V        |                                        | 15.69       |                     |                    |  |
|             |          |       |                   |        |     | 71       | 80           | 538.74                                                           | 1075.46         | 1075.59     | -0.13 | 0    | 51         | 0.0005838 | K.VLLPEYGGTK.V        |                                        | 20.87       |                     |                    |  |
|             |          |       |                   |        |     | 81       | 92           | 510.54                                                           | 1528.59         | 1528.79     | -0.2  | 1    | 44         | 0.0025444 | K.VVLDKDYFLFR.D       |                                        | 22.91       |                     |                    |  |
|             |          |       |                   |        |     | 93       | 99           | 359.14                                                           | 716.27          | 716.37      | -0.1  | 0    | 55         | 0.0003644 | R.DGDILGK.Y           |                                        | 16.17       |                     |                    |  |
| P07602      | 7%       | 221   | 4                 | 59899  | 5.1 | P07602   | SAP_HUMAN    | Proactivator polypeptide                                         | OS=Homo sapiens | GN=PSAP     | PE=1  | SV=2 |            |           |                       |                                        |             |                     |                    |  |
|             |          |       |                   |        |     | 233      | 242          | 539.19                                                           | 1076.37         | 1076.5      | -0.13 | 0    | 60         | 8.11E-05  | R.LGPGMADICK.N        | Oxidation (M)                          | 16.04       |                     | 2                  |  |
|             |          |       |                   |        |     | 405      | 413          | 536.15                                                           | 1070.29         | 1070.42     | -0.13 | 0    | 34         | 0.0122264 | K.DGGFCEVCK.K         |                                        | 17.27       |                     |                    |  |
|             |          |       |                   |        |     | 430      | 438          | 507.73                                                           | 1013.44         | 1013.58     | -0.13 | 0    | 76         | 2.22E-06  | K.QEILAALEK.G         |                                        | 21.74       |                     |                    |  |

| accession # | coverage | score | distinct peptides | mass  | pl  | start AA | end AA | m/z obs | M obs   | M calc  | delta | miss | pept score | exp val   | peptide          | modifications | retent time | Strongest gel slice | # gel slices found |
|-------------|----------|-------|-------------------|-------|-----|----------|--------|---------|---------|---------|-------|------|------------|-----------|------------------|---------------|-------------|---------------------|--------------------|
| P02748      | 4%       | 108   | 2                 | 64615 | 5.4 | 439      | 449    | 656.23  | 1310.44 | 1310.6  | -0.16 | 0    | 52         | 0.000356  | K.GCSFLPDYQK.Q   |               | 21.91       | 33                  | 2                  |
|             |          |       |                   |       |     | 473      | 483    | 621.8   | 1241.58 | 1241.74 | -0.16 | 0    | 41         | 0.0066978 | K.LSPIYNLVPVK.M  |               | 22.82       |                     |                    |
|             |          |       |                   |       |     | 497      | 508    | 728.25  | 1454.49 | 1454.7  | -0.22 | 0    | 67         | 1.29E-05  | R.AIEDYINEFSVR.K |               | 23.52       |                     |                    |
| Q8IX18      | 1%       | 75    | 2                 | 89815 | 8.9 | 108      | 117    | 521.73  | 1041.45 | 1041.63 | -0.18 | 1    | 40         | 0.0073478 | R.KVAAISVAQR.V   |               | 13.58       | 33                  | 1                  |
|             |          |       |                   |       |     | 109      | 117    | 457.69  | 913.37  | 913.53  | -0.17 | 0    | 35         | 0.0242364 | K.VAAISVAQR.V    |               | 14.18       |                     |                    |

**\*Footnotes to Supplemental Table 4:**

Data sets were searched with the Mascot search engine (see Perkins et al. (1999)*Electrophoresis* **20**, 3551-3567).

Detailed are the SwissProt accession number, the number of distinct proteolytic peptides (in some cases the number of observed redundant peptide sequences is indicated in parentheses), and the sequence coverage of the protein (%).

Listed is the Mascot protein score as well as the score and expectation value for the individual peptides.

Additional columns indicate the position of the protein in the 1D-SDS PAGE gel (strongest gel slice in which the protein was identified, and the total # of adjacent gel slices in which the protein was found).

Proteins identified by single-peptide assignments for this experiment are not listed in this Table but in Supplemental Table 12.

**Supplemental Table 5. Proteins identified by HPLC-MS/MS in 1-day BCG infected human THP-1 phagosome preparation.\***

ESI-MS/MS raw data obtained on a QSTAR Pulsar i instrument and Mascot search results for trypsin digestion of proteins separated on a 1D-SDS PAGE gel. For summary see Supplemental Table 1

| accession # | coverage | score | distinct peptides | mass   | pI  | start AA           | end AA                                               | m/z obs         | M obs           | M calc   | delta | miss | pept score | exp val   | peptide              | modifications           | retent time | Strongest gel slice | # gel slices found |  |
|-------------|----------|-------|-------------------|--------|-----|--------------------|------------------------------------------------------|-----------------|-----------------|----------|-------|------|------------|-----------|----------------------|-------------------------|-------------|---------------------|--------------------|--|
| P05141      | 10%      | 117   | 3                 | 33102  | 9.8 | P05141 ADT2_HUMAN  | ADP/ATP translocase 2                                | OS=Homo sapiens | GN=SLC25A5      | PE=1     | SV=6  |      |            |           |                      |                         |             |                     |                    |  |
|             |          |       |                   |        |     | 2                  | 10                                                   | 476.16          | 950.31          | 950.47   | -0.16 | 0    | 31         | 0.0432418 | M.TDAAVSFAK.D        | Acetyl (Protein N-term) | 19.5        | 1                   | 3                  |  |
|             |          |       |                   |        |     | 11                 | 23                                                   | 610.23          | 1218.45         | 1218.66  | -0.21 | 0    | 53         | 0.0003347 | K.DFLAGGVAAAIK.T     |                         | 20.67       |                     |                    |  |
|             |          |       |                   |        |     | 73                 | 80                                                   | 428.86          | 855.7           | 855.49   | 0.21  | 0    | 34         | 0.0134017 | R.GNLANVIR.Y         |                         | 16.42       |                     |                    |  |
| P12236      | 7%       | 84    | 2                 | 33073  | 9.8 | P12236 ADT3_HUMAN  | ADP/ATP translocase 3                                | OS=Homo sapiens | GN=SLC25A6      | PE=1     | SV=4  |      |            |           |                      |                         |             |                     |                    |  |
|             |          |       |                   |        |     | 11                 | 23                                                   | 617.25          | 1232.49         | 1232.68  | -0.19 | 0    | 50         | 0.0007489 | K.DFLAGGIAAAISK.T    |                         | 21.29       | 1                   | 1                  |  |
|             |          |       |                   |        |     | 73                 | 80                                                   | 428.86          | 855.7           | 855.49   | 0.21  | 0    | 34         | 0.0134017 | R.GNLANVIR.Y         |                         | 16.42       |                     |                    |  |
| P27105      | 7%       | 105   | 2                 | 31882  | 7.7 | P27105 STOM_HUMAN  | Erythrocyte band 7 integral membrane protein         | OS=Homo sapiens | GN=STOM         | PE=1     | SV=3  |      |            |           |                      |                         |             |                     |                    |  |
|             |          |       |                   |        |     | 145                | 152                                                  | 458.2           | 914.39          | 914.55   | -0.17 | 0    | 48         | 0.0013803 | R.LLAQTTLR.N         |                         | 14.68       | 2                   | 3                  |  |
|             |          |       |                   |        |     | 221                | 232                                                  | 632.21          | 1262.41         | 1262.59  | -0.18 | 0    | 57         | 0.0001439 | K.VIAAEGEMNASR.A     | Oxidation (M)           | 12.36       |                     |                    |  |
| Q09666      | 1%       | 140   | 3 (4)             | 629213 | 5.8 | Q09666 AHNK_HUMAN  | Neuroblast differentiation-associated protein        | AHNAK           | OS=Homo sapiens | GN=AHNAK | PE=1  | SV=2 |            |           |                      |                         |             |                     |                    |  |
|             |          |       |                   |        |     | 764                | 775                                                  | 634.24          | 1266.47         | 1266.65  | -0.18 | 0    | 48         | 0.0010333 | K.AEGPEVDVNLPK.A     |                         | 19.19       | 2                   | 1                  |  |
|             |          |       |                   |        |     | 1141               | 1152                                                 | 627.23          | 1252.45         | 1252.63  | -0.18 | 0    | 32         | 0.0390033 | K.GEGPEVDVNLPK.A     |                         | 19.27       |                     |                    |  |
|             |          |       |                   |        |     | 1281               | 1289                                                 | 451.17          | 900.33          | 900.46   | -0.13 | 0    | 40         | 0.0091561 | K.ADIDVSGPK.V        |                         | 13.23       |                     |                    |  |
|             |          |       |                   |        |     | 1409               | 1417                                                 | 444.16          | 886.3           | 886.44   | -0.14 | 0    | 38         | 0.0119581 | K.ADVVDSGPK.M        |                         | 12.66       |                     |                    |  |
| P08962      | 11%      | 166   | 4                 | 26474  | 8.1 | P08962 CD63_HUMAN  | CD63 antigen                                         | OS=Homo sapiens | GN=CD63         | PE=1     | SV=2  |      |            |           |                      |                         |             |                     |                    |  |
|             |          |       |                   |        |     | 109                | 120                                                  | 506.17          | 1515.5          | 1515.68  | -0.18 | 1    | 50         | 0.0006939 | R.DKVMSEFNNFR.Q      | Oxidation (M)           | 16.74       | 4                   | 12                 |  |
|             |          |       |                   |        |     | 111                | 120                                                  | 637.19          | 1272.36         | 1272.56  | -0.2  | 0    | 57         | 8.85E-05  | K.VMSEFNNFR.Q        | Oxidation (M)           | 16.47       |                     |                    |  |
|             |          |       |                   |        |     | 121                | 128                                                  | 527.17          | 1052.32         | 1052.46  | -0.14 | 0    | 31         | 0.0418269 | R.QQMENYPK.N         | Oxidation (M)           | 12.03       |                     |                    |  |
|             |          |       |                   |        |     | 139                | 144                                                  | 378.11          | 754.2           | 754.33   | -0.13 | 0    | 28         | 0.0329329 | R.MQADFK.C           | Oxidation (M)           | 12.21       |                     |                    |  |
| P05023      | 6%       | 227   | 5                 | 114135 | 5.3 | P05023 AT1A1_HUMAN | Sodium/potassium-transporting ATPase subunit alpha-1 | OS=Homo sapiens | GN=ATP1A1       | PE=1     | SV=1  |      |            |           |                      |                         |             |                     |                    |  |
|             |          |       |                   |        |     | 228                | 240                                                  | 760.25          | 1518.48         | 1518.7   | -0.22 | 0    | 67         | 1.24E-05  | R.SPFTNENPLETR.N     |                         | 19.57       | 4                   | 4                  |  |
|             |          |       |                   |        |     | 446                | 458                                                  | 616.24          | 1230.47         | 1230.65  | -0.18 | 0    | 46         | 0.001905  | R.AVAGDASESALLK.C    |                         | 17.72       |                     |                    |  |
|             |          |       |                   |        |     | 648                | 658                                                  | 618.74          | 1235.47         | 1235.7   | -0.23 | 0    | 33         | 0.0306012 | R.LNIPVSVQVNP.R      |                         | 19.09       |                     |                    |  |
|             |          |       |                   |        |     | 699                | 707                                                  | 544.2           | 1086.39         | 1086.59  | -0.2  | 0    | 37         | 0.0153683 | K.LIIVGCGQR.Q        |                         | 17.43       |                     |                    |  |
|             |          |       |                   |        |     | 728                | 743                                                  | 753.76          | 1505.51         | 1505.74  | -0.23 | 0    | 43         | 0.0036887 | K.ADIGVAMGIAGSDVSK.Q | Oxidation (M)           | 18.88       |                     |                    |  |
| O15118      | 2%       | 116   | 2                 | 144868 | 5.2 | O15118 NPC1_HUMAN  | Niemann-Pick C1 protein                              | OS=Homo sapiens | GN=NPC1         | PE=1     | SV=2  |      |            |           |                      |                         |             |                     |                    |  |
|             |          |       |                   |        |     | 715                | 726                                                  | 679.26          | 1356.5          | 1356.7   | -0.2  | 0    | 58         | 0.0001278 | R.LQGETLDQQLGR.V     |                         | 18.49       | 4                   | 3                  |  |
|             |          |       |                   |        |     | 998                | 1010                                                 | 768.3           | 1534.59         | 1534.75  | -0.16 | 0    | 58         | 0.0001063 | R.FLPMFLSDNPNPK.C    | Oxidation (M)           | 20.43       |                     |                    |  |
| Q9Y490      | 6%       | 664   | 14                | 271766 | 5.8 | Q9Y490 TLN1_HUMAN  | Talin-1                                              | OS=Homo sapiens | GN=TLN1         | PE=1     | SV=3  |      |            |           |                      |                         |             |                     |                    |  |
|             |          |       |                   |        |     | 285                | 295                                                  | 641.71          | 1281.4          | 1281.53  | -0.13 | 0    | 51         | 0.0003869 | K.NCGMQSEIAK.V       | Oxidation (M)           | 12.21       | 6                   | 3                  |  |
|             |          |       |                   |        |     | 625                | 634                                                  | 507.16          | 1012.31         | 1012.49  | -0.18 | 0    | 32         | 0.0271973 | R.SAQPASAEPR.Q       |                         | 11.85       |                     |                    |  |
|             |          |       |                   |        |     | 899                | 910                                                  | 610.2           | 1218.39         | 1218.6   | -0.21 | 0    | 62         | 3.69E-05  | R.MATNAAAQNAIK.K     | Oxidation (M)           | 12.34       |                     |                    |  |
|             |          |       |                   |        |     | 1026               | 1035                                                 | 529.21          | 1056.41         | 1056.59  | -0.18 | 0    | 57         | 0.0001743 | K.NLGTALAEALR.T      |                         | 20.07       |                     |                    |  |
|             |          |       |                   |        |     | 1199               | 1207                                                 | 538.67          | 1075.32         | 1075.49  | -0.17 | 0    | 35         | 0.0195351 | R.CVSLPGQR.D         |                         | 13.25       |                     |                    |  |
|             |          |       |                   |        |     | 1321               | 1332                                                 | 599.24          | 1196.47         | 1196.64  | -0.17 | 0    | 44         | 0.0025813 | K.ALSTDPAAPNLK.S     |                         | 15.29       |                     |                    |  |
|             |          |       |                   |        |     | 1402               | 1415                                                 | 717.74          | 1433.47         | 1433.72  | -0.25 | 0    | 66         | 1.86E-05  | K.VLGEAMTGISQNAK.N   | Oxidation (M)           | 13.78       |                     |                    |  |
|             |          |       |                   |        |     | 1531               | 1541                                                 | 573.23          | 1144.44         | 1144.61  | -0.17 | 0    | 46         | 0.0019678 | K.EVANSTANLVK.T      |                         | 13.49       |                     |                    |  |
|             |          |       |                   |        |     | 1594               | 1604                                                 | 573.24          | 1144.47         | 1144.62  | -0.15 | 0    | 33         | 0.0383389 | R.AAMEPIVISAQ.T      | Oxidation (M)           | 16.13       |                     |                    |  |
|             |          |       |                   |        |     | 1605               | 1618                                                 | 732.26          | 1462.5          | 1462.74  | -0.24 | 0    | 47         | 0.0013658 | K.TMLESAGGLIQTAR.A   | Oxidation (M)           | 19.14       |                     |                    |  |
|             |          |       |                   |        |     | 1752               | 1766                                                 | 576.21          | 1172.61         | 1172.87  | -0.26 | 0    | 36         | 0.0168654 | K.TLSHPQQMALLDQTK.T  | Oxidation (M)           | 13.92       |                     |                    |  |
|             |          |       |                   |        |     | 2032               | 2043                                                 | 622.22          | 1242.43         | 1242.66  | -0.23 | 0    | 60         | 6.29E-05  | K.VLVQNAAGSQEK.L     |                         | 12.51       |                     |                    |  |
|             |          |       |                   |        |     | 2090               | 2099                                                 | 494.71          | 987.41          | 987.56   | -0.15 | 0    | 44         | 0.0039767 | K.ALGDILSATK.A       |                         | 19.66       |                     |                    |  |
|             |          |       |                   |        |     | 2120               | 2130                                                 | 610.74          | 1219.46         | 1219.68  | -0.22 | 0    | 55         | 0.0002635 | K.VMVTNVTSLK.T       | Oxidation (M)           | 19.94       |                     |                    |  |
| P49327      | 5%       | 554   | 12                | 275850 | 6   | P49327 FAS_HUMAN   | Fatty acid synthase                                  | OS=Homo sapiens | GN=FASN         | PE=1     | SV=2  |      |            |           |                      |                         |             |                     |                    |  |
|             |          |       |                   |        |     | 203                | 213                                                  | 604.68          | 1207.34         | 1207.56  | -0.22 | 0    | 57         | 9.21E-05  | R.LGMLSPGETCK.A      | Oxidation (M)           | 13.58       | 7                   | 1                  |  |
|             |          |       |                   |        |     | 225                | 235                                                  | 558.25          | 1114.48         | 1114.66  | -0.18 | 0    | 32         | 0.0491068 | R.SEGVAVLLTK.K       |                         | 20.51       |                     |                    |  |
|             |          |       |                   |        |     | 299                | 310                                                  | 649.72          | 1297.42         | 1297.66  | -0.24 | 0    | 47         | 0.0011141 | K.VGDPQELNGITR.A     |                         | 17.59       |                     |                    |  |
|             |          |       |                   |        |     | 317                | 326                                                  | 543.22          | 1084.42         | 1084.61  | -0.19 | 0    | 42         | 0.0054987 | R.QEPLLIQSTK.S       |                         | 18.94       |                     |                    |  |
|             |          |       |                   |        |     | 374                | 384                                                  | 632.27          | 1262.52         | 1262.73  | -0.22 | 0    | 56         | 0.0002089 | R.LQVVDQPLVPR.G      |                         | 19.37       |                     |                    |  |

| accession # | coverage | score | distinct peptides | mass   | pl  | start AA            | end AA                                 | m/z obs         | M obs     | M calc  | delta | miss | pept score | exp val   | peptide              | modifications   | retent time | Strongest gel slice | # gel slices found |
|-------------|----------|-------|-------------------|--------|-----|---------------------|----------------------------------------|-----------------|-----------|---------|-------|------|------------|-----------|----------------------|-----------------|-------------|---------------------|--------------------|
|             |          |       |                   |        |     | 469                 | 477                                    | 461.15          | 920.29    | 920.47  | -0.18 | 0    | 39         | 0.0071226 | R.GYAVLGGGER.G       |                 |             |                     | 15.84              |
|             |          |       |                   |        |     | 928                 | 936                                    | 481.19          | 960.36    | 960.52  | -0.16 | 0    | 63         | 4.18E-05  | K.TGTVSLEVR.L        |                 |             |                     | 15.21              |
|             |          |       |                   |        |     | 1073                | 1082                                   | 522.22          | 1042.42   | 1042.58 | -0.16 | 0    | 51         | 0.0006189 | K.AQVADVVSRSR.W      |                 |             |                     | 14.7               |
|             |          |       |                   |        |     | 1132                | 1142                                   | 651.73          | 1301.45   | 1301.66 | -0.21 | 0    | 53         | 0.0003299 | R.AALQEELQLCK.G      |                 |             |                     | 19.5               |
|             |          |       |                   |        |     | 1172                | 1180                                   | 535.19          | 1068.36   | 1068.52 | -0.16 | 0    | 38         | 0.0096678 | R.DPSQQLPR.L         |                 |             |                     | 13.41              |
|             |          |       |                   |        |     | 1712                | 1724                                   | 735.25          | 1468.49   | 1468.69 | -0.2  | 0    | 41         | 0.0052672 | R.FPQLDSTSFANSR.D    |                 |             |                     | 19.85              |
|             |          |       |                   |        |     | 2221                | 2233                                   | 721.76          | 1441.5    | 1441.76 | -0.26 | 0    | 36         | 0.0162755 | R.SLLVPEGPLMLR.L     | Oxidation (M)   |             |                     | 19.63              |
| P35579      | 7%       | 631   | 14                | 227646 | 5.5 | P35579 MYH9_HUMAN   | Myosin-9                               | OS=Homo sapiens | GN=MYH9   | PE=1    | SV=4  |      |            |           |                      |                 |             | 8                   | 5                  |
|             |          |       |                   |        |     | 359                 | 373                                    | 804.2           | 1606.39   | 1606.69 | -0.3  | 0    | 40         | 0.0024401 | R.RTDQASMPDNTAAQK.V  | Oxidation (M)   |             |                     | 11.87              |
|             |          |       |                   |        |     | 663                 | 670                                    | 481.17          | 960.32    | 960.48  | -0.16 | 0    | 42         | 0.0049998 | R.NTNPVFVR.C         |                 |             |                     | 13.2               |
|             |          |       |                   |        |     | 694                 | 702                                    | 509.17          | 1016.33   | 1016.51 | -0.17 | 0    | 56         | 0.0002007 | R.CNGVLEGIIR.I       |                 |             |                     | 18.72              |
|             |          |       |                   |        |     | 712                 | 718                                    | 462.67          | 923.33    | 923.49  | -0.16 | 0    | 46         | 0.0015421 | R.VVFQEFQR.Q         |                 |             |                     | 19.57              |
|             |          |       |                   |        |     | 738                 | 745                                    | 489.68          | 977.34    | 977.5   | -0.17 | 0    | 40         | 0.008276  | K.QACVLMKIA          | Oxidation (M)   |             |                     | 17.63              |
|             |          |       |                   |        |     | 746                 | 755                                    | 597.22          | 1192.42   | 1192.61 | -0.19 | 0    | 56         | 0.000155  | K.ALELDNSLYR.I       |                 |             |                     | 19.88              |
|             |          |       |                   |        |     | 803                 | 810                                    | 482.16          | 962.31    | 962.49  | -0.17 | 0    | 46         | 0.0018348 | R.QQQLTAMK.V         | Oxidation (M)   |             |                     | 12.04              |
|             |          |       |                   |        |     | 815                 | 821                                    | 420.14          | 838.27    | 838.4   | -0.14 | 0    | 39         | 0.0053581 | R.NCAAYLKL           |                 |             |                     | 13.15              |
|             |          |       |                   |        |     | 1250                | 1260                                   | 642.76          | 1283.5    | 1283.71 | -0.21 | 0    | 35         | 0.0237286 | K.VEAQLQELQVK.F      |                 |             |                     | 19.28              |
|             |          |       |                   |        |     | 1484                | 1492                                   | 532.67          | 1063.32   | 1063.49 | -0.17 | 0    | 45         | 0.0017857 | R.ALEEAMEQK.A        | Oxidation (M)   |             |                     | 12.22              |
|             |          |       |                   |        |     | 1529                | 1538                                   | 610.73          | 1219.44   | 1219.58 | -0.14 | 0    | 45         | 0.0023058 | R.ALEQQVEEMK.T       | Oxidation (M)   |             |                     | 13.27              |
|             |          |       |                   |        |     | 1558                | 1566                                   | 531.2           | 1060.39   | 1060.56 | -0.17 | 0    | 60         | 8.43E-05  | R.LEVNLQAMK.A        | Oxidation (M)   |             |                     | 16.81              |
|             |          |       |                   |        |     | 1794                | 1802                                   | 525.67          | 1049.32   | 1049.51 | -0.18 | 0    | 33         | 0.0292385 | K.LQEMEGTVK.S        | Oxidation (M)   |             |                     | 12.26              |
|             |          |       |                   |        |     | 1807                | 1815                                   | 452.19          | 902.36    | 902.51  | -0.15 | 0    | 58         | 0.0001395 | K.ASITALEAK.I        |                 |             |                     | 15.6               |
| P46940      | 2%       | 160   | 3                 | 189761 | 6.1 | P46940 IQGAP1_HUMAN | Ras GTPase-activating-like protein     | OS=Homo sapiens | GN=IQGAP1 | PE=1    | SV=1  |      |            |           |                      |                 |             | 10                  | 1                  |
|             |          |       |                   |        |     | 327                 | 336                                    | 513.23          | 1024.44   | 1024.6  | -0.17 | 0    | 49         | 0.0009083 | R.ALQSPALGLR.G       |                 |             |                     | 19.27              |
|             |          |       |                   |        |     | 1028                | 1035                                   | 466.18          | 930.34    | 930.5   | -0.16 | 0    | 48         | 0.0013964 | K.TALQEEIK.S         |                 |             |                     | 14.18              |
|             |          |       |                   |        |     | 1506                | 1516                                   | 618.72          | 1235.42   | 1235.65 | -0.23 | 0    | 64         | 2.87E-05  | K.LQQTYYAALNSK.A     |                 |             |                     | 14.57              |
| Q00610      | 7%       | 598   | 12                | 193260 | 5.5 | Q00610 CLH1_HUMAN   | Clathrin heavy chain 1                 | OS=Homo sapiens | GN=CLTC   | PE=1    | SV=5  |      |            |           |                      |                 |             | 11                  | 1                  |
|             |          |       |                   |        |     | 87                  | 96                                     | 626.72          | 1251.42   | 1251.65 | -0.24 | 0    | 44         | 0.0025334 | K.TLQIFNIEMK.S       | Oxidation (M)   |             |                     | 20.51              |
|             |          |       |                   |        |     | 177                 | 188                                    | 677.23          | 1352.45   | 1352.68 | -0.23 | 0    | 72         | 4.31E-06  | R.VVGAMQLYSVDR.K     | Oxidation (M)   |             |                     | 19.09              |
|             |          |       |                   |        |     | 355                 | 366                                    | 652.7           | 1303.38   | 1303.65 | -0.27 | 0    | 73         | 2.71E-06  | R.NNLGAEELFAR.K      |                 |             |                     | 20.29              |
|             |          |       |                   |        |     | 488                 | 500                                    | 754.25          | 1506.48   | 1506.75 | -0.27 | 0    | 46         | 0.001583  | K.VIQCFAETGVQVK.I    |                 |             |                     | 16.6               |
|             |          |       |                   |        |     | 799                 | 806                                    | 528.19          | 1054.37   | 1054.57 | -0.2  | 0    | 47         | 0.0010639 | K.YIEIYVQK.V         |                 |             |                     | 19.39              |
|             |          |       |                   |        |     | 882                 | 892                                    | 667.68          | 1333.35   | 1333.63 | -0.28 | 0    | 61         | 2.77E-05  | K.IYIDSNNNPER.F      |                 |             |                     | 14.07              |
|             |          |       |                   |        |     | 1040                | 1046                                   | 470.64          | 939.26    | 939.45  | -0.19 | 0    | 29         | 0.0413766 | R.VMEYINR.L          | Oxidation (M)   |             |                     | 13.1               |
|             |          |       |                   |        |     | 1123                | 1130                                   | 469.66          | 937.31    | 937.48  | -0.17 | 0    | 39         | 0.0069501 | K.EAIDSYIK.A         |                 |             |                     | 18.93              |
|             |          |       |                   |        |     | 1156                | 1161                                   | 399.13          | 796.24    | 796.39  | -0.15 | 0    | 39         | 0.0046585 | K.YLQMAR.K           | Oxidation (M)   |             |                     | 12.31              |
|             |          |       |                   |        |     | 1216                | 1226                                   | 648.73          | 1295.44   | 1295.66 | -0.22 | 0    | 58         | 9.43E-05  | K.LLYNNVSNFGR.L      |                 |             |                     | 19.71              |
|             |          |       |                   |        |     | 1398                | 1406                                   | 563.7           | 1125.39   | 1125.58 | -0.2  | 0    | 54         | 0.0002512 | K.VANVELYYR.A        |                 |             |                     | 19.29              |
|             |          |       |                   |        |     | 1510                | 1516                                   | 413.17          | 824.32    | 824.48  | -0.16 | 0    | 40         | 0.0053702 | R.IAAYLFK.G          |                 |             |                     | 19.8               |
| P15144      | 8%       | 457   | 8                 | 109870 | 5.3 | P15144 AMPN_HUMAN   | Aminopeptidase N                       | OS=Homo sapiens | GN=ANPEP  | PE=1    | SV=4  |      |            |           |                      |                 |             | 12                  | 3                  |
|             |          |       |                   |        |     | 196                 | 204                                    | 550.64          | 1099.27   | 1099.46 | -0.19 | 0    | 41         | 0.0013927 | R.SEYMEGNVR.K        | Oxidation (M)   |             |                     | 12.36              |
|             |          |       |                   |        |     | 205                 | 218                                    | 502.51          | 1504.5    | 1504.77 | -0.27 | 1    | 47         | 0.0011943 | R.KVVATTQMQAADAR.K   | Oxidation (M)   |             |                     | 11.9               |
|             |          |       |                   |        |     | 206                 | 218                                    | 689.23          | 1376.45   | 1376.67 | -0.22 | 0    | 92         | 4.13E-08  | K.VVATTQMQAADAR.K    | Oxidation (M)   |             |                     | 12.15              |
|             |          |       |                   |        |     | 242                 | 252                                    | 609.71          | 1217.41   | 1217.63 | -0.22 | 0    | 58         | 0.0001177 | K.DLTALSNNMLPK.G     | Oxidation (M)   |             |                     | 20.08              |
|             |          |       |                   |        |     | 293                 | 301                                    | 479.19          | 956.37    | 956.54  | -0.17 | 0    | 61         | 6.41E-05  | K.QASNGVLR.I         |                 |             |                     | 13.57              |
|             |          |       |                   |        |     | 364                 | 379                                    | 862.8           | 1723.58   | 1723.83 | -0.25 | 0    | 62         | 4.33E-05  | R.ENSLFLDPLSSSSSNK.E |                 |             |                     | 20.69              |
|             |          |       |                   |        |     | 433                 | 442                                    | 627.21          | 1252.41   | 1252.61 | -0.21 | 0    | 51         | 0.0004572 | K.DLMVLNDVYR.V       | Oxidation (M)   |             |                     | 20.27              |
|             |          |       |                   |        |     | 642                 | 648                                    | 443.67          | 885.33    | 885.5   | -0.17 | 0    | 46         | 0.0019302 | K.IQTQLQR.D          |                 |             |                     | 12.66              |
| P05556      | 2%       | 72    | 2                 | 91714  | 5.3 | P05556 ITB1_HUMAN   | Integrin beta-1                        | OS=Homo sapiens | GN=ITGB1  | PE=1    | SV=1  |      |            |           |                      |                 |             | 12                  | 2                  |
|             |          |       |                   |        |     | 182                 | 190                                    | 492.18          | 982.34    | 982.51  | -0.17 | 0    | 39         | 0.0082196 | R.IGFGSFVEK.T        |                 |             |                     | 20.03              |
|             |          |       |                   |        |     | 785                 | 794                                    | 508.21          | 1014.4    | 1014.57 | -0.17 | 0    | 33         | 0.0442603 | K.SAVTTVVNPK.Y       |                 |             |                     | 13.33              |
| P41252      | 2%       | 74    | 2                 | 146178 | 5.9 | P41252 SYIC_HUMAN   | Isoleucyl-tRNA synthetase, cytoplasmic | OS=Homo sapiens | GN=IARS   | PE=1    | SV=1  |      |            |           |                      |                 |             | 12                  | 1                  |
|             |          |       |                   |        |     | 629                 | 638                                    | 587.25          | 1172.48   | 1172.69 | -0.21 | 0    | 33         | 0.0445403 | R.LYLYNSPVVR.A       |                 |             |                     | 19.99              |
|             |          |       |                   |        |     | 922                 | 933                                    | 733.24          | 1464.46   | 1464.71 | -0.25 | 0    | 42         | 0.0040301 | K.QLSSEELEQFQK.T     |                 |             |                     | 19.32              |
| Q92896      | 2%       | 68    | 2                 | 138382 | 6.5 | Q92896 GSLG1_HUMAN  | Golgi apparatus protein 1              | OS=Homo sapiens | GN=GSLG1  | PE=1    | SV=1  |      |            |           |                      |                 |             | 12                  | 1                  |
|             |          |       |                   |        |     | 385                 | 392                                    | 501.15          | 1000.29   | 1000.48 | -0.18 | 0    | 39         | 0.0062307 | R.CNVENLPR.S         |                 |             |                     | 13.48              |
|             |          |       |                   |        |     | 1089                | 1100                                   | 743.69          | 1485.37   | 1485.61 | -0.24 | 0    | 29         | 0.0349375 | R.QMSCLMEALEDK.R     | 2 Oxidation (M) |             |                     | 19.11              |
| accession # | coverage | score | distinct peptides | mass   | pl  | start AA            | end AA                                 | m/z obs         | M obs     | M calc  | delta | miss | pept score | exp val   | peptide              | modifications   | retent time | Strongest gel slice | # gel slices found |

| accession # | coverage | score | distinct peptides | mass   | pl  | start AA | end AA       | m/z obs                                                  | M obs           | M calc     | delta   | miss    | pept score | exp val | peptide | modifications | retent time         | Strongest gel slice | # gel slices found |  |
|-------------|----------|-------|-------------------|--------|-----|----------|--------------|----------------------------------------------------------|-----------------|------------|---------|---------|------------|---------|---------|---------------|---------------------|---------------------|--------------------|--|
| P08648      | 4%       | 166   | 3                 | 115605 | 5.5 | P08648   | JTA5_HUMAN   | Integrin alpha-5                                         | OS=Homo sapiens | GN=ITGA5   | PE=1    | SV=2    |            |         |         |               |                     | 13                  | 2                  |  |
|             |          |       |                   |        |     |          |              | 567                                                      | 581             | 814.33     | 1626.65 | 1626.91 | -0.25      | 0       | 75      | 1.98E-06      | R.QATLTQTLLIQNGAR.E |                     | 20.08              |  |
|             |          |       |                   |        |     |          |              | 695                                                      | 708             | 744.78     | 1487.55 | 1487.76 | -0.21      | 0       | 58      | 0.0001118     | R.VTAPPEAEYSGLVR.H  |                     | 19.48              |  |
|             |          |       |                   |        |     |          |              | 728                                                      | 738             | 638.23     | 1274.45 | 1274.64 | -0.18      | 0       | 32      | 0.0409138     | R.LLVCDLGNPMK.A     | Oxidation (M)       | 19.65              |  |
| P42704      | 3%       | 199   | 4                 | 159003 | 5.8 | P42704   | JLPPRC_HUMAN | Leucine-rich PPR motif-containing protein, mitochondrial | OS=Homo sapiens | GN=LRPPRC  | PE=1    | SV=3    |            |         |         |               |                     | 13                  | 1                  |  |
|             |          |       |                   |        |     |          |              | 188                                                      | 197             | 609.19     | 1216.37 | 1216.55 | -0.18      | 0       | 51      | 0.0004712     | K.MEEANIQPNR.V      | Oxidation (M)       | 12.55              |  |
|             |          |       |                   |        |     |          |              | 740                                                      | 750             | 553.18     | 1104.34 | 1104.57 | -0.23      | 0       | 47      | 0.0012093     | R.LDSSAVLDTGK.Y     |                     | 17.37              |  |
|             |          |       |                   |        |     |          |              | 1099                                                     | 1109            | 583.19     | 1164.37 | 1164.55 | -0.19      | 0       | 39      | 0.0079013     | K.GFTLNDAAANSR.L    |                     | 18.74              |  |
|             |          |       |                   |        |     |          |              | 1129                                                     | 1139            | 636.73     | 1271.44 | 1271.65 | -0.21      | 0       | 62      | 4.27E-05      | K.TVLDQQQTPSR.L     |                     | 13.24              |  |
| Q16706      | 2%       | 109   | 2                 | 131742 | 7.2 | Q16706   | MA2A1_HUMAN  | Alpha-mannosidase 2                                      | OS=Homo sapiens | GN=MAN2A1  | PE=1    | SV=2    |            |         |         |               |                     | 13                  | 1                  |  |
|             |          |       |                   |        |     |          |              | 61                                                       | 73              | 749.81     | 1497.61 | 1497.82 | -0.2       | 0       | 77      | 1.43E-06      | R.LLAENNEIISNIR.D   |                     | 20                 |  |
|             |          |       |                   |        |     |          |              | 965                                                      | 974             | 551.19     | 1100.37 | 1100.55 | -0.17      | 0       | 32      | 0.0445163     | R.GLEQGIQDNK.I      |                     | 13.37              |  |
| Q9Y4L1      | 2%       | 83    | 2                 | 111494 | 5.2 | Q9Y4L1   | HYOU1_HUMAN  | Hypoxia up-regulated protein 1                           | OS=Homo sapiens | GN=HYOU1   | PE=1    | SV=1    |            |         |         |               |                     | 13                  | 1                  |  |
|             |          |       |                   |        |     |          |              | 269                                                      | 278             | 567.71     | 1133.4  | 1133.58 | -0.17      | 0       | 39      | 0.0090581     | R.TLGGLEMELR.L      | Oxidation (M)       | 19.69              |  |
|             |          |       |                   |        |     |          |              | 283                                                      | 291             | 524.2      | 1046.39 | 1046.55 | -0.16      | 0       | 44      | 0.003162      | R.LAGLFNEQR.K       |                     | 19.56              |  |
| P11279      | 5%       | 133   | 2                 | 45367  | 9   | P11279   | JLAMP1_HUMAN | Lysosome-associated membrane glycoprotein 1              | OS=Homo sapiens | GN=LAMP1   | PE=1    | SV=3    |            |         |         |               |                     | 16                  | 5                  |  |
|             |          |       |                   |        |     |          |              | 138                                                      | 146             | 517.2      | 1032.38 | 1032.55 | -0.16      | 0       | 62      | 5.08E-05      | K.TVESITDIR.A       |                     | 18.97              |  |
|             |          |       |                   |        |     |          |              | 327                                                      | 337             | 576.21     | 1150.41 | 1150.6  | -0.19      | 0       | 67      | 1.24E-05      | R.ALQATVGNYSYK.C    |                     | 13.66              |  |
| P53396      | 4%       | 228   | 4                 | 121674 | 7   | P53396   | ACLY_HUMAN   | ATP-citrate synthase                                     | OS=Homo sapiens | GN=ACLY    | PE=1    | SV=3    |            |         |         |               |                     | 16                  | 1                  |  |
|             |          |       |                   |        |     |          |              | 89                                                       | 97              | 451.69     | 901.36  | 901.49  | -0.13      | 0       | 49      | 0.0013049     | R.LGQEAIVGK.A       |                     | 12.45              |  |
|             |          |       |                   |        |     |          |              | 636                                                      | 650             | 760.26     | 1518.5  | 1518.77 | -0.27      | 0       | 48      | 0.0010557     | K.IGNTGGMLDNILASK.L | Oxidation (M)       | 19.89              |  |
|             |          |       |                   |        |     |          |              | 663                                                      | 676             | 754.26     | 1506.5  | 1506.71 | -0.21      | 0       | 72      | 4.35E-06      | R.SGGMSELNLIISR.T   | Oxidation (M)       | 19.5               |  |
|             |          |       |                   |        |     |          |              | 935                                                      | 944             | 460.68     | 919.34  | 919.48  | -0.14      | 0       | 61      | 5.36E-05      | R.FGGALDAAAK.M      |                     | 15.01              |  |
| P18206      | 3%       | 142   | 3                 | 124292 | 5.5 | P18206   | VINC_HUMAN   | Vinculin                                                 | OS=Homo sapiens | GN=VCL     | PE=1    | SV=4    |            |         |         |               |                     | 16                  | 1                  |  |
|             |          |       |                   |        |     |          |              | 327                                                      | 339             | 755.23     | 1508.45 | 1508.7  | -0.25      | 0       | 56      | 0.0001503     | K.MLGMQMTDQVADLR.A  | 2 Oxidation (M)     | 18.58              |  |
|             |          |       |                   |        |     |          |              | 670                                                      | 680             | 585.73     | 1169.44 | 1169.64 | -0.2       | 0       | 32      | 0.040223      | R.ELTPQVVSAAAR.I    |                     | 17.9               |  |
|             |          |       |                   |        |     |          |              | 803                                                      | 815             | 635.25     | 1268.49 | 1268.67 | -0.18      | 0       | 55      | 0.0002438     | K.AVAGNISDPGLQK.S   |                     | 14.87              |  |
| P14625      | 14%      | 610   | 11                | 92696  | 4.8 | P14625   | JENPL_HUMAN  | Endoplasmic reticulum chaperone                          | OS=Homo sapiens | GN=HSP90B1 | PE=1    | SV=1    |            |         |         |               |                     | 18                  | 3                  |  |
|             |          |       |                   |        |     |          |              | 76                                                       | 84              | 541.19     | 1080.37 | 1080.54 | -0.17      | 0       | 46      | 0.0014833     | K.FAFQAEVNR.M       |                     | 19.41              |  |
|             |          |       |                   |        |     |          |              | 103                                                      | 114             | 638.23     | 1274.45 | 1274.64 | -0.19      | 0       | 68      | 1.13E-05      | R.ELISNASDALDK.I    |                     | 19.23              |  |
|             |          |       |                   |        |     |          |              | 103                                                      | 116             | 515.53     | 1543.58 | 1543.82 | -0.24      | 1       | 65      | 2.41E-05      | R.ELISNASDALDKIR.L  |                     | 19.84              |  |
|             |          |       |                   |        |     |          |              | 143                                                      | 156             | 510.52     | 1528.53 | 1528.77 | -0.24      | 0       | 61      | 4.80E-05      | K.NLLHVTDITGVGMTR.E | Oxidation (M)       | 18.56              |  |
|             |          |       |                   |        |     |          |              | 169                                                      | 177             | 491.66     | 981.32  | 981.48  | -0.16      | 0       | 68      | 8.20E-06      | K.SGTSEFLNK.M       |                     | 14.45              |  |
|             |          |       |                   |        |     |          |              | 385                                                      | 395             | 594.26     | 1186.5  | 1186.67 | -0.17      | 0       | 40      | 0.0080672     | K.SILFVPTSAPR.G     |                     | 20.32              |  |
|             |          |       |                   |        |     |          |              | 435                                                      | 448             | 743.28     | 1484.54 | 1484.75 | -0.21      | 0       | 88      | 1.04E-07      | K.GVVDSDDLPLNVS.R   |                     | 20.02              |  |
|             |          |       |                   |        |     |          |              | 494                                                      | 503             | 380.47     | 1138.38 | 1138.57 | -0.19      | 0       | 41      | 0.0043179     | K.LGVIEDHSNR.T      |                     | 12.94              |  |
|             |          |       |                   |        |     |          |              | 548                                                      | 557             | 575.68     | 1149.35 | 1149.53 | -0.18      | 0       | 47      | 0.0011711     | K.EAESSPFVLR.L      |                     | 15.39              |  |
|             |          |       |                   |        |     |          |              | 672                                                      | 682             | 645.21     | 1288.4  | 1288.59 | -0.19      | 0       | 35      | 0.0192079     | K.DISTNYYASQK.K     |                     | 16.05              |  |
|             |          |       |                   |        |     |          |              | 725                                                      | 733             | 497.2      | 992.38  | 992.52  | -0.14      | 0       | 55      | 0.0002196     | R.SGYLLPDTK.A       |                     | 19.06              |  |
| P13639      | 9%       | 365   | 8                 | 96246  | 6.4 | P13639   | EF2_HUMAN    | Elongation factor 2                                      | OS=Homo sapiens | GN=EEF2    | PE=1    | SV=4    |            |         |         |               |                     | 18                  | 2                  |  |
|             |          |       |                   |        |     |          |              | 2                                                        | 10              | 546.21     | 1090.41 | 1090.58 | -0.17      | 0       | 62      | 4.42E-05      | M.VNFTVDQIR.A       |                     | 19.62              |  |
|             |          |       |                   |        |     |          |              | 43                                                       | 50              | 379.67     | 757.32  | 757.44  | -0.13      | 0       | 34      | 0.0429473     | K.AGIASAR.A         |                     | 13.16              |  |
|             |          |       |                   |        |     |          |              | 227                                                      | 235             | 551.68     | 1101.34 | 1101.52 | -0.17      | 0       | 53      | 0.0002816     | K.QFAEMVYVAK.F      | Oxidation (M)       | 15.35              |  |
|             |          |       |                   |        |     |          |              | 240                                                      | 249             | 507.17     | 1012.33 | 1012.49 | -0.16      | 0       | 40      | 0.0054586     | K.GEGQLGPAER.A      |                     | 12.72              |  |
|             |          |       |                   |        |     |          |              | 416                                                      | 426             | 554.24     | 1106.47 | 1106.63 | -0.16      | 0       | 62      | 4.43E-05      | R.VFSGLVSTGLK.V     |                     | 19.93              |  |
|             |          |       |                   |        |     |          |              | 429                                                      | 438             | 547.19     | 1092.37 | 1092.53 | -0.16      | 0       | 41      | 0.0052447     | R.IMGNPYTPGK.K      | Oxidation (M)       | 13.46              |  |
|             |          |       |                   |        |     |          |              | 499                                                      | 506             | 445.69     | 889.36  | 889.5   | -0.14      | 0       | 34      | 0.0312078     | K.FSVSPVVR.V        |                     | 18.97              |  |
|             |          |       |                   |        |     |          |              | 573                                                      | 580             | 461.67     | 921.32  | 921.46  | -0.14      | 0       | 38      | 0.009693      | K.SDPVVSYSR.E       |                     | 13.76              |  |
| O43707      | 6%       | 298   | 5                 | 105245 | 5.3 | O43707   | JACTN4_HUMAN | Alpha-actinin-4                                          | OS=Homo sapiens | GN=ACTN4   | PE=1    | SV=2    |            |         |         |               |                     | 18                  | 1                  |  |
|             |          |       |                   |        |     |          |              | 115                                                      | 122             | 432.68     | 863.34  | 863.48  | -0.13      | 0       | 47      | 0.0015034     | K.ALDFIASK.G        |                     | 19.67              |  |
|             |          |       |                   |        |     |          |              | 153                                                      | 166             | 769.29     | 1536.56 | 1536.77 | -0.21      | 0       | 75      | 1.95E-06      | R.FAIQDISVEETSAK.E  |                     | 20.15              |  |
|             |          |       |                   |        |     |          |              | 626                                                      | 632             | 406.19     | 810.36  | 810.5   | -0.13      | 0       | 32      | 0.0377586     | K.VQQLVPK.R         |                     | 13.29              |  |
|             |          |       |                   |        |     |          |              | 746                                                      | 757             | 715.28     | 1428.55 | 1428.76 | -0.21      | 0       | 85      | 2.01E-07      | R.TINEVENQILTR.D    |                     | 19.88              |  |
|             |          |       |                   |        |     |          |              | 761                                                      | 771             | 684.72     | 1367.42 | 1367.61 | -0.2       | 0       | 60      | 5.56E-05      | K.GISQEQMQEFR.A     | Oxidation (M)       | 13.89              |  |

| accession # | coverage | score  | distinct peptides | mass    | pl    | start AA                                                                           | end AA | m/z obs | M obs   | M calc  | delta | miss                                                                                      | pept score | exp val   | peptide                | modifications   | retent time | Strongest gel slice | # gel slices found |    |   |           |             |  |       |    |   |  |
|-------------|----------|--------|-------------------|---------|-------|------------------------------------------------------------------------------------|--------|---------|---------|---------|-------|-------------------------------------------------------------------------------------------|------------|-----------|------------------------|-----------------|-------------|---------------------|--------------------|----|---|-----------|-------------|--|-------|----|---|--|
| Q14697      | 5%       | 196    | 5                 | 107263  | 5.7   | Q14697 GANAB_HUMAN Neutral alpha-glucosidase AB OS=Homo sapiens GN=GANAB PE=1 SV=3 |        |         |         |         |       |                                                                                           |            |           |                        |                 |             |                     |                    |    |   |           |             |  |       |    |   |  |
|             |          |        |                   |         |       | 103                                                                                | 109    | 436.16  | 870.3   | 870.44  | -0.15 | 0                                                                                         | 41         | 0.0043268 | R.IDELEPR.R            |                 | 14.06       | 18                  | 1                  |    |   |           |             |  |       |    |   |  |
|             |          |        |                   |         |       | 158                                                                                | 164    | 437.17  | 872.33  | 872.46  | -0.13 | 0                                                                                         | 37         | 0.0198549 | R.LDLLEDR.S            |                 | 19.8        |                     |                    |    |   |           |             |  |       |    |   |  |
|             |          |        |                   |         |       | 165                                                                                | 173    | 486.72  | 971.43  | 971.58  | -0.15 | 0                                                                                         | 37         | 0.0194045 | R.SLLLSVNR.G           |                 | 19.71       |                     |                    |    |   |           |             |  |       |    |   |  |
|             |          |        |                   |         |       | 591                                                                                | 602    | 446     | 1334.98 | 1334.68 | 0.3   | 0                                                                                         | 44         | 0.001989  | R.SGGMERPFVLAR.A       | Oxidation (M)   | 16.34       |                     |                    |    |   |           |             |  |       |    |   |  |
|             |          |        |                   |         |       | 915                                                                                | 929    | 580.9   | 1739.68 | 1739.92 | -0.24 | 0                                                                                         | 39         | 0.0091113 | R.LSFQHPETSVLVLR.K     |                 | 20.19       |                     |                    |    |   |           |             |  |       |    |   |  |
| P12814      | 5%       | 277    | 4                 | 103563  | 5.3   | P12814 ACTN1_HUMAN Alpha-actinin-1 OS=Homo sapiens GN=ACTN1 PE=1 SV=2              |        |         |         |         |       |                                                                                           |            |           |                        |                 |             |                     |                    |    |   |           |             |  |       |    |   |  |
|             |          |        |                   |         |       | 96                                                                                 | 103    | 432.68  | 863.34  | 863.48  | -0.13 | 0                                                                                         | 47         | 0.0015034 | K.ALDFIASK.G           |                 | 19.67       | 18                  | 1                  |    |   |           |             |  |       |    |   |  |
|             |          |        |                   |         |       | 134                                                                                | 147    | 769.29  | 1536.56 | 1536.77 | -0.21 | 0                                                                                         | 75         | 1.95E-06  | R.FAIQDISVEETSAK.E     |                 | 20.15       |                     |                    |    |   |           |             |  |       |    |   |  |
|             |          |        |                   |         |       | 727                                                                                | 738    | 715.28  | 1428.55 | 1428.76 | -0.21 | 0                                                                                         | 85         | 2.01E-07  | R.TINEVENQILTR.D       |                 | 19.88       |                     |                    |    |   |           |             |  |       |    |   |  |
|             |          |        |                   |         |       | 742                                                                                | 752    | 677.7   | 1353.39 | 1353.6  | -0.2  | 0                                                                                         | 71         | 4.08E-06  | K.GISQEQMNEFR.A        | Oxidation (M)   | 13.98       |                     |                    |    |   |           |             |  |       |    |   |  |
|             |          |        |                   |         |       | P08238                                                                             | 15%    | 555     | 10      | 83554   | 5     | P08238 HSP90B_HUMAN Heat shock protein HSP 90-beta OS=Homo sapiens GN=HSP90AB1 PE=1 SV=4  |            |           |                        |                 |             |                     |                    |    |   |           |             |  |       |    |   |  |
| 42          | 53       | 638.23 | 1274.45           | 1274.64 | -0.18 |                                                                                    |        |         |         |         |       | 0                                                                                         | 76         | 1.90E-06  | R.ELISNASDALDK.I       |                 | 19.23       |                     |                    | 19 | 4 |           |             |  |       |    |   |  |
| 73          | 82       | 597.73 | 1193.44           | 1193.64 | -0.2  |                                                                                    |        |         |         |         |       | 0                                                                                         | 38         | 0.0105914 | K.IDIIPNQR.T           |                 | 19.6        |                     |                    |    |   |           |             |  |       |    |   |  |
| 83          | 95       | 683.27 | 1364.52           | 1364.72 | -0.2  |                                                                                    |        |         |         |         |       | 0                                                                                         | 81         | 5.40E-07  | R.TLTLVDTGIGMTK.A      | Oxidation (M)   | 19.68       |                     |                    |    |   |           |             |  |       |    |   |  |
| 96          | 107      | 621.76 | 1241.51           | 1241.7  | -0.19 |                                                                                    |        |         |         |         |       | 0                                                                                         | 59         | 9.25E-05  | K.ADLINNLGTIAK.S       |                 | 20.2        |                     |                    |    |   |           |             |  |       |    |   |  |
| 276         | 284      | 576.19 | 1150.37           | 1150.55 | -0.18 |                                                                                    |        |         |         |         |       | 0                                                                                         | 46         | 0.0015715 | K.YIDQEELNK.T          |                 | 14          |                     |                    |    |   |           |             |  |       |    |   |  |
| 379         | 392      | 757.27 | 1512.52           | 1512.78 | -0.26 |                                                                                    |        |         |         |         |       | 0                                                                                         | 77         | 1.48E-06  | R.GVVDSLEDPLNISR.E     |                 | 20.25       |                     |                    |    |   |           |             |  |       |    |   |  |
| 429         | 435      | 446.14 | 890.26            | 890.42  | -0.15 |                                                                                    |        |         |         |         |       | 0                                                                                         | 34         | 0.0231432 | K.FYEFASK.N            |                 | 18.65       |                     |                    |    |   |           |             |  |       |    |   |  |
| 482         | 491      | 580.7  | 1159.39           | 1159.58 | -0.19 |                                                                                    |        |         |         |         |       | 0                                                                                         | 45         | 0.0023784 | K.SIYYITGESK.E         |                 | 19.14       |                     |                    |    |   |           |             |  |       |    |   |  |
| 492         | 502      | 625.23 | 1248.45           | 1248.61 | -0.16 |                                                                                    |        |         |         |         |       | 0                                                                                         | 70         | 7.86E-06  | K.EQVANSAFVER.V        |                 | 15.06       |                     |                    |    |   |           |             |  |       |    |   |  |
| 613         | 623      | 648.65 | 1295.29           | 1295.48 | -0.19 |                                                                                    |        |         |         |         |       | 0                                                                                         | 29         | 0.0178197 | R.DNSTMGYMMAK.K        | 3 Oxidation (M) | 12.37       |                     |                    |    |   |           |             |  |       |    |   |  |
| P05107      | 9%       | 300    | 7                 | 87976   | 6.7   |                                                                                    |        |         |         |         |       | P05107 ITB2_HUMAN Integrin beta-2 OS=Homo sapiens GN=ITGB2 PE=1 SV=2                      |            |           |                        |                 |             |                     |                    |    |   |           |             |  |       |    |   |  |
|             |          |        |                   |         |       |                                                                                    |        |         |         |         |       | 149                                                                                       | 155        | 372.16    | 742.31                 | 742.43          | -0.13       | 0                   | 33                 |    |   | 0.0364554 | K.LGGDLLR.A |  | 18.32 | 19 | 3 |  |
|             |          |        |                   |         |       | 166                                                                                | 174    | 485.18  | 968.35  | 968.5   | -0.14 | 0                                                                                         | 33         | 0.0293445 | R.IGFSGSFVDK.T         |                 | 20.29       |                     |                    |    |   |           |             |  |       |    |   |  |
|             |          |        |                   |         |       | 275                                                                                | 285    | 563.73  | 1125.44 | 1125.61 | -0.18 | 0                                                                                         | 50         | 0.0006888 | K.LGAILTPNDGR.C        |                 | 18.6        |                     |                    |    |   |           |             |  |       |    |   |  |
|             |          |        |                   |         |       | 311                                                                                | 325    | 836.84  | 1671.67 | 1671.89 | -0.22 | 0                                                                                         | 59         | 8.04E-05  | K.LAENNIQPIFAVTSR.M    |                 | 20.55       |                     |                    |    |   |           |             |  |       |    |   |  |
|             |          |        |                   |         |       | 489                                                                                | 498    | 576.66  | 1151.31 | 1151.49 | -0.18 | 0                                                                                         | 30         | 0.0364212 | R.SSQELEGSCR.K         |                 | 12.32       |                     |                    |    |   |           |             |  |       |    |   |  |
|             |          |        |                   |         |       | 544                                                                                | 554    | 582.67  | 1163.33 | 1163.51 | -0.19 | 0                                                                                         | 41         | 0.0038255 | R.YNGQVCGGPR.G         |                 | 12.57       |                     |                    |    |   |           |             |  |       |    |   |  |
|             |          |        |                   |         |       | 578                                                                                | 586    | 524.19  | 1046.36 | 1046.48 | -0.12 | 0                                                                                         | 55         | 0.0002433 | R.TTEGCLNPR.R          |                 | 12.62       |                     |                    |    |   |           |             |  |       |    |   |  |
|             |          |        |                   |         |       | P07900                                                                             | 9%     | 363     | 6       | 85006   | 4.9   | P07900 HSP90A_HUMAN Heat shock protein HSP 90-alpha OS=Homo sapiens GN=HSP90AA1 PE=1 SV=5 |            |           |                        |                 |             |                     |                    |    |   |           |             |  |       |    |   |  |
| 88          | 100      | 683.27 | 1364.52           | 1364.72 | -0.2  |                                                                                    |        |         |         |         |       | 0                                                                                         | 81         | 5.40E-07  | R.TLTIIVDTGIGMTK.A     | Oxidation (M)   | 19.68       | 19                  | 2                  |    |   |           |             |  |       |    |   |  |
| 101         | 112      | 621.76 | 1241.51           | 1241.7  | -0.19 |                                                                                    |        |         |         |         |       | 0                                                                                         | 59         | 9.25E-05  | K.ADLINNLGTIAK.S       |                 | 20.2        |                     |                    |    |   |           |             |  |       |    |   |  |
| 284         | 292      | 576.19 | 1150.37           | 1150.55 | -0.18 |                                                                                    |        |         |         |         |       | 0                                                                                         | 46         | 0.0015715 | K.YIDQEELNK.T          |                 | 14          |                     |                    |    |   |           |             |  |       |    |   |  |
| 387         | 400      | 757.27 | 1512.52           | 1512.78 | -0.26 |                                                                                    |        |         |         |         |       | 0                                                                                         | 77         | 1.48E-06  | R.GVVDSLEDPLNISR.E     |                 | 20.25       |                     |                    |    |   |           |             |  |       |    |   |  |
| 437         | 443      | 474.65 | 947.29            | 947.44  | -0.15 |                                                                                    |        |         |         |         |       | 0                                                                                         | 34         | 0.0247872 | K.FYEQFSK.N            |                 | 16.57       |                     |                    |    |   |           |             |  |       |    |   |  |
| 500         | 510      | 618.21 | 1234.4            | 1234.59 | -0.19 |                                                                                    |        |         |         |         |       | 0                                                                                         | 66         | 1.82E-05  | K.DQVANSAFVER.L        |                 | 16.16       |                     |                    |    |   |           |             |  |       |    |   |  |
| P27824      | 3%       | 83     | 2                 | 67982   | 4.5   | P27824 CALX_HUMAN Calnexin OS=Homo sapiens GN=CANX PE=1 SV=2                       |        |         |         |         |       |                                                                                           |            |           |                        |                 |             |                     |                    |    |   |           |             |  |       |    |   |  |
|             |          |        |                   |         |       | 211                                                                                | 217    | 420.15  | 838.28  | 838.41  | -0.13 | 0                                                                                         | 41         | 0.0041984 | K.TGIYEEK.H            |                 | 12.88       | 19                  | 2                  |    |   |           |             |  |       |    |   |  |
|             |          |        |                   |         |       | 574                                                                                | 582    | 544.8   | 1087.59 | 1087.51 | 0.07  | 0                                                                                         | 42         | 0.0050551 | K.AEEDILNR.S           |                 | 15.76       |                     |                    |    |   |           |             |  |       |    |   |  |
| Q14108      | 6%       | 164    | 3                 | 54712   | 5     | Q14108 SCRB2_HUMAN Lysosome membrane protein 2 OS=Homo sapiens GN=SCARB2 PE=1 SV=2 |        |         |         |         |       |                                                                                           |            |           |                        |                 |             |                     |                    |    |   |           |             |  |       |    |   |  |
|             |          |        |                   |         |       | 83                                                                                 | 92     | 606.71  | 1211.41 | 1211.58 | -0.17 | 0                                                                                         | 39         | 0.0069222 | R.VEEVGPYTYR.E         |                 | 17.86       | 21                  | 3                  |    |   |           |             |  |       |    |   |  |
|             |          |        |                   |         |       | 116                                                                                | 121    | 392.63  | 783.25  | 783.39  | -0.14 | 0                                                                                         | 31         | 0.0268462 | K.AYVFER.D             |                 | 15.96       |                     |                    |    |   |           |             |  |       |    |   |  |
|             |          |        |                   |         |       | 391                                                                                | 402    | 704.25  | 1406.48 | 1406.7  | -0.23 | 1                                                                                         | 94         | 2.68E-08  | K.KLDDFVETGDIR.T       |                 | 19.37       |                     |                    |    |   |           |             |  |       |    |   |  |
| P01871      | 5%       | 73     | 2                 | 49960   | 6.3   | P01871 IGHM_HUMAN Ig mu chain C region OS=Homo sapiens GN=IGHM PE=1 SV=3           |        |         |         |         |       |                                                                                           |            |           |                        |                 |             |                     |                    |    |   |           |             |  |       |    |   |  |
|             |          |        |                   |         |       | 113                                                                                | 120    | 450.71  | 899.4   | 899.52  | -0.12 | 0                                                                                         | 35         | 0.028709  | K.VSVFVPPR.D           |                 | 18.85       | 21                  | 1                  |    |   |           |             |  |       |    |   |  |
|             |          |        |                   |         |       | 154                                                                                | 169    | 809.27  | 1616.52 | 1616.8  | -0.28 | 0                                                                                         | 38         | 0.0094851 | K.QVGSVTTDQVQAEAK.E    |                 | 13.59       |                     |                    |    |   |           |             |  |       |    |   |  |
| Q01813      | 4%       | 77     | 4                 | 86454   | 7.5   | Q01813 K6PP_HUMAN 6-phosphofructokinase type C OS=Homo sapiens GN=PFKP PE=1 SV=2   |        |         |         |         |       |                                                                                           |            |           |                        |                 |             |                     |                    |    |   |           |             |  |       |    |   |  |
|             |          |        |                   |         |       | 26                                                                                 | 44     | 902.33  | 1802.65 | 1802.89 | -0.24 | 0                                                                                         | 44         | 0.002365  | K.AIGVLTSGGDAQMNAAVR.A | Oxidation (M)   | 18.45       | 21                  | 1                  |    |   |           |             |  |       |    |   |  |
|             |          |        |                   |         |       | 487                                                                                | 496    | 635.21  | 1268.41 | 1268.61 | -0.2  | 0                                                                                         | 33         | 0.0321958 | K.YLEEIATQMR.T         | Oxidation (M)   | 18.06       |                     |                    |    |   |           |             |  |       |    |   |  |
| P15311      | 3%       | 103    | 2                 | 69484   | 5.9   | P15311 EZRI_HUMAN Ezrin OS=Homo sapiens GN=EZR PE=1 SV=4                           |        |         |         |         |       |                                                                                           |            |           |                        |                 |             |                     |                    |    |   |           |             |  |       |    |   |  |
|             |          |        |                   |         |       | 364                                                                                | 371    | 501.67  | 1001.33 | 1001.51 | -0.19 | 0                                                                                         | 51         | 0.0005659 | R.ELSEQIQR.A           |                 | 13.08       | 21                  | 2                  |    |   |           |             |  |       |    |   |  |
|             |          |        |                   |         |       | 372                                                                                | 379    | 494.18  | 986.35  | 986.5   | -0.15 | 0                                                                                         | 51         | 0.000616  | R.ALQLEEER.K           |                 | 14.61       |                     |                    |    |   |           |             |  |       |    |   |  |

| accession # | coverage | score  | distinct peptides | mass    | pl    | start AA           | end AA                                                              | m/z obs                                                      | M obs  | M calc | delta   | miss    | pept score | exp val            | peptide                                                                                            | modifications                           | retent time           | Strongest gel slice      | # gel slices found |         |         |         |        |           |                  |                 |                  |                 |       |    |
|-------------|----------|--------|-------------------|---------|-------|--------------------|---------------------------------------------------------------------|--------------------------------------------------------------|--------|--------|---------|---------|------------|--------------------|----------------------------------------------------------------------------------------------------|-----------------------------------------|-----------------------|--------------------------|--------------------|---------|---------|---------|--------|-----------|------------------|-----------------|------------------|-----------------|-------|----|
| P11021      | 28%      | 908    | 16                | 72402   | 5.1   | P11021 GRP78_HUMAN | 78 kDa                                                              | glucose-regulated protein OS=Homo sapiens GN=HSPA5 PE=1 SV=2 | 47     | 60     | 519.18  | 1554.51 | 1554.79    | -0.27              | 1                                                                                                  | 58                                      | 9.96E-05              | K.NGRVEIANDQGNR.I        | 13.2               | 22      | 1       |         |        |           |                  |                 |                  |                 |       |    |
|             |          |        |                   |         |       |                    |                                                                     |                                                              | 50     | 60     | 614.73  | 1227.45 | 1227.62    | -0.17              | 0                                                                                                  | 69                                      | 1.02E-05              | R.VEIIANDQGNR.I          | 13.88              |         |         |         |        |           |                  |                 |                  |                 |       |    |
|             |          |        |                   |         |       |                    |                                                                     |                                                              | 61     | 74     | 783.79  | 1565.56 | 1565.77    | -0.22              | 0                                                                                                  | 61                                      | 5.10E-05              | R.ITPSYVAFTPEGER.L       | 19.84              |         |         |         |        |           |                  |                 |                  |                 |       |    |
|             |          |        |                   |         |       |                    |                                                                     |                                                              | 82     | 96     | 839.29  | 1676.58 | 1676.8     | -0.23              | 0                                                                                                  | 95                                      | 2.09E-08              | K.NQLTSNPENTVFDKAR.R     | 19.36              |         |         |         |        |           |                  |                 |                  |                 |       |    |
|             |          |        |                   |         |       |                    |                                                                     |                                                              | 82     | 97     | 611.87  | 1832.6  | 1832.9     | -0.3               | 1                                                                                                  | 66                                      | 1.36E-05              | K.NQLTSNPENTVFDKAR.L     | 18.97              |         |         |         |        |           |                  |                 |                  |                 |       |    |
|             |          |        |                   |         |       |                    |                                                                     |                                                              | 124    | 138    | 802.84  | 1603.67 | 1603.86    | -0.19              | 0                                                                                                  | 50                                      | 0.0006705             | K.TKPYIQVDIGGGQTK.T      | 18.79              |         |         |         |        |           |                  |                 |                  |                 |       |    |
|             |          |        |                   |         |       |                    |                                                                     |                                                              | 139    | 152    | 776.79  | 1551.56 | 1551.79    | -0.22              | 0                                                                                                  | 41                                      | 0.0045086             | K.TFAPEEISAMVLT.K.M      | 20.49              |         |         |         |        |           |                  |                 |                  |                 |       |    |
|             |          |        |                   |         |       |                    |                                                                     |                                                              | 186    | 197    | 617.23  | 1232.44 | 1232.62    | -0.18              | 0                                                                                                  | 49                                      | 0.0009927             | K.DAGTIAGLVNMR.I         | Oxidation (M)      |         |         | 19.27   |        |           |                  |                 |                  |                 |       |    |
|             |          |        |                   |         |       |                    |                                                                     |                                                              | 198    | 214    | 605.92  | 1814.73 | 1814.99    | -0.26              | 1                                                                                                  | 62                                      | 3.43E-05              | R.IINEPTAAAIAYGLDKR.E    | Oxidation (M)      |         |         | 20.05   |        |           |                  |                 |                  |                 |       |    |
|             |          |        |                   |         |       |                    |                                                                     |                                                              | 325    | 336    | 510.18  | 1527.53 | 1527.74    | -0.21              | 1                                                                                                  | 49                                      | 0.0009472             | R.AKFEELNMDLFR.S         | Oxidation (M)      |         |         | 19.97   |        |           |                  |                 |                  |                 |       |    |
|             |          |        |                   |         |       |                    |                                                                     |                                                              | 345    | 352    | 459.68  | 917.34  | 917.47     | -0.13              | 0                                                                                                  | 36                                      | 0.0201278             | K.VLEDSDLK.K             |                    |         |         | 13.73   |        |           |                  |                 |                  |                 |       |    |
|             |          |        |                   |         |       |                    |                                                                     |                                                              | 353    | 367    | 794.81  | 1587.61 | 1587.85    | -0.23              | 1                                                                                                  | 85                                      | 2.45E-07              | K.KSDIDEIVLVGGSTR.I      |                    |         |         | 19.71   |        |           |                  |                 |                  |                 |       |    |
|             |          |        |                   |         |       |                    |                                                                     |                                                              | 448    | 464    | 918.84  | 1835.66 | 1835.93    | -0.27              | 0                                                                                                  | 31                                      | 0.0460498             | K.SQFSTASDNQPTVTIK.V     |                    |         |         | 19.58   |        |           |                  |                 |                  |                 |       |    |
|             |          |        |                   |         |       |                    |                                                                     |                                                              | 524    | 532    | 537.71  | 1073.4  | 1073.55    | -0.15              | 0                                                                                                  | 60                                      | 8.62E-05              | K.IITITNDQNR.L           |                    |         |         | 12.9    |        |           |                  |                 |                  |                 |       |    |
|             |          |        |                   |         |       |                    |                                                                     |                                                              | 563    | 573    | 658.73  | 1315.44 | 1315.63    | -0.19              | 0                                                                                                  | 45                                      | 0.0023727             | R.NELESYAYSLK.N          |                    |         |         | 20.01   |        |           |                  |                 |                  |                 |       |    |
|             |          |        |                   |         |       |                    |                                                                     |                                                              | 622    | 633    | 699.3   | 1396.58 | 1396.78    | -0.2               | 0                                                                                                  | 55                                      | 0.0002369             | K.ELEEIVQPIISK.L         |                    |         |         | 20.36   |        |           |                  |                 |                  |                 |       |    |
|             |          |        |                   |         |       |                    |                                                                     |                                                              | P26038 | 12%    | 366     | 8       | 67892      | 6.1                | P26038 MOES_HUMAN                                                                                  | Moesin OS=Homo sapiens GN=MSN PE=1 SV=3 | 28                    | 35                       | 488.7              |         |         | 975.39  | 975.54 | -0.14     | 0                | 40              | 0.0084762        | K.QLFDQVVK.T    | 19.53 | 22 |
| 264         | 273      | 591.72 | 1181.42           | 1181.59 | -0.17 | 0                  | 51                                                                  | 0.0004801                                                    |        |        |         |         |            |                    |                                                                                                    |                                         | K.APDFVFYAPR.L        | 20.62                    |                    |         |         |         |        |           |                  |                 |                  |                 |       |    |
| 361         | 371      | 463.16 | 1386.47           | 1386.69 | -0.22 | 1                  | 43                                                                  | 0.0036346                                                    |        |        |         |         |            |                    |                                                                                                    |                                         | K.AQQLQEEQTRR.A       | 12.21                    |                    |         |         |         |        |           |                  |                 |                  |                 |       |    |
| 372         | 379      | 494.2  | 986.38            | 986.5   | -0.13 | 0                  | 38                                                                  | 0.0120838                                                    |        |        |         |         |            |                    |                                                                                                    |                                         | R.ALELEQER.K          | 14.83                    |                    |         |         |         |        |           |                  |                 |                  |                 |       |    |
| 401         | 408      | 444.18 | 886.35            | 886.49  | -0.14 | 0                  | 53                                                                  | 0.0004478                                                    |        |        |         |         |            |                    |                                                                                                    |                                         | K.EALLQASR.D          | 14.07                    |                    |         |         |         |        |           |                  |                 |                  |                 |       |    |
| 428         | 435      | 482.18 | 962.35            | 962.49  | -0.14 | 0                  | 44                                                                  | 0.0030542                                                    |        |        |         |         |            |                    |                                                                                                    |                                         | R.ISQLEMAR.Q          | Oxidation (M)            | 12.86              |         |         |         |        |           |                  |                 |                  |                 |       |    |
| 449         | 458      | 603.7  | 1205.39           | 1205.56 | -0.17 | 0                  | 56                                                                  | 0.0001639                                                    |        |        |         |         |            |                    |                                                                                                    |                                         | K.AQMVQEDLEK.T        | Oxidation (M)            | 13.07              |         |         |         |        |           |                  |                 |                  |                 |       |    |
| 569         | 577      | 585.67 | 1169.32           | 1169.5  | -0.18 | 1                  | 40                                                                  | 0.0031614                                                    |        |        |         |         |            |                    |                                                                                                    |                                         | K.QRIDEFESM.-         | Oxidation (M)            | 16.2               |         |         |         |        |           |                  |                 |                  |                 |       |    |
| P38646      | 5%       | 178    | 3                 | 73920   | 5.9   | P38646 GRP75_HUMAN | Stress-70 protein, mitochondrial OS=Homo sapiens GN=HSPA9 PE=1 SV=2 | 207                                                          |        |        |         |         |            |                    |                                                                                                    |                                         | 218                   | 621.77                   | 1241.53            | 1241.67 | -0.15   | 0       | 49     | 0.0010713 | K.DAGQISGLNVLR.V | 20.23           | 22               | 1               |       |    |
|             |          |        |                   |         |       |                    |                                                                     | 395                                                          |        |        |         |         |            |                    |                                                                                                    |                                         | 405                   | 645.74                   | 1289.47            | 1289.67 | -0.2    | 0       | 36     | 0.0177157 | K.VQQTVDLFR.A    | 20.1            |                  |                 |       |    |
|             |          |        |                   |         |       |                    |                                                                     | 635                                                          | 646    | 616.24 | 1230.47 | 1230.66 | -0.18      | 0                  | 93                                                                                                 | 3.54E-08                                | R.QAASSLQQAASK.L      | 13.55                    |                    |         |         |         |        |           |                  |                 |                  |                 |       |    |
|             |          |        |                   |         |       |                    |                                                                     | P13796                                                       | 16%    | 535    | 10      | 70815   | 5.2        | P13796 PLSL_HUMAN  | Plastin-2 OS=Homo sapiens GN=LCP1 PE=1 SV=5                                                        | 4                                       | 15                    | 707.68                   | 1413.34            | 1413.58 | -0.24   | 0       | 53     | 9.03E-05  | R.GSVSDEEMMELR.E | 2 Oxidation (M) |                  |                 | 13.77 | 24 |
| 133         | 141      | 545.14 | 1088.27           | 1088.46 | -0.18 | 0                  | 49                                                                  |                                                              |        |        |         |         |            |                    |                                                                                                    | 0.0003166                               | K.ALENDPDCR.H         |                          | 12.39              |         |         |         |        |           |                  |                 |                  |                 |       |    |
| 166         | 178      | 759.77 | 1517.53           | 1517.74 | -0.21 | 0                  | 70                                                                  |                                                              |        |        |         |         |            |                    |                                                                                                    | 6.63E-06                                | K.MINLSVPDTIDER.T     | Oxidation (M)            | 19.96              |         |         |         |        |           |                  |                 |                  |                 |       |    |
| 286         | 294      | 497.68 | 993.35            | 993.51  | -0.16 | 0                  | 34                                                                  |                                                              |        |        |         |         |            |                    |                                                                                                    | 0.028326                                | K.IGNFSTDIK.D         |                          | 18.69              |         |         |         |        |           |                  |                 |                  |                 |       |    |
| 286         | 297      | 442.16 | 1323.45           | 1323.67 | -0.22 | 1                  | 51                                                                  |                                                              |        |        |         |         |            |                    |                                                                                                    | 0.0004758                               | K.IGNFSTDIKDSK.A      |                          | 14.9               |         |         |         |        |           |                  |                 |                  |                 |       |    |
| 334         | 343      | 626.18 | 1250.34           | 1250.54 | -0.2  | 0                  | 54                                                                  |                                                              |        |        |         |         |            |                    |                                                                                                    | 0.0001787                               | R.AECMLQQAER.L        | Oxidation (M)            | 12.61              |         |         |         |        |           |                  |                 |                  |                 |       |    |
| 348         | 357      | 568.22 | 1134.43           | 1134.6  | -0.17 | 0                  | 53                                                                  |                                                              |        |        |         |         |            |                    |                                                                                                    | 0.0003351                               | R.QFVTATDVVR.G        |                          | 19                 |         |         |         |        |           |                  |                 |                  |                 |       |    |
| 473         | 488      | 838.3  | 1674.59           | 1674.83 | -0.24 | 0                  | 72                                                                  |                                                              |        |        |         |         |            |                    |                                                                                                    | 4.19E-06                                | K.FSLVIGGGQDLNEG.NR.T |                          | 20.52              |         |         |         |        |           |                  |                 |                  |                 |       |    |
| 585         | 591      | 414.15 | 826.29            | 826.4   | -0.11 | 0                  | 31                                                                  |                                                              |        |        |         |         |            |                    |                                                                                                    | 0.0356227                               | K.YAISMAR.K           | Oxidation (M)            | 12.91              |         |         |         |        |           |                  |                 |                  |                 |       |    |
| 597         | 610      | 793.32 | 1584.63           | 1584.84 | -0.21 | 0                  | 67                                                                  |                                                              |        |        |         |         |            |                    |                                                                                                    | 1.31E-05                                | R.VYALPEDLVEVNP.K.M   |                          | 20.57              |         |         |         |        |           |                  |                 |                  |                 |       |    |
| P31948      | 11%      | 267    | 6                 | 63227   | 6.4   | P31948 STIP1_HUMAN | Stress-induced-phosphoprotein 1 OS=Homo sapiens GN=STIP1 PE=1 SV=1  | 1                                                            | 10     | 653.22 | 1304.43 | 1304.63 | -0.2       | 1                  | 51                                                                                                 | 0.0004727                               | -MEQVNELKEK.G         | Acetyl (Protein N-term); | 14.03              | 24      | 1       |         |        |           |                  |                 |                  |                 |       |    |
|             |          |        |                   |         |       |                    |                                                                     | 110                                                          | 118    | 532.17 | 1062.33 | 1062.48 | -0.15      | 0                  | 45                                                                                                 | 0.0020984                               | K.EGLQNMEAR.L         | Oxidation (M)            | 12.22              |         |         |         |        |           |                  |                 |                  |                 |       |    |
|             |          |        |                   |         |       |                    |                                                                     | 352                                                          | 364    | 744.8  | 1487.58 | 1487.79 | -0.21      | 0                  | 44                                                                                                 | 0.0024959                               | R.LAYINPDLALEEK.N     | Oxidation (M)            | 20.35              |         |         |         |        |           |                  |                 |                  |                 |       |    |
|             |          |        |                   |         |       |                    |                                                                     | 454                                                          | 462    | 504.65 | 1007.28 | 1007.46 | -0.17      | 0                  | 37                                                                                                 | 0.0088187                               | K.ALDLDSCK.E          |                          | 14.07              |         |         |         |        |           |                  |                 |                  |                 |       |    |
|             |          |        |                   |         |       |                    |                                                                     | 506                                                          | 513    | 509.71 | 1017.41 | 1017.55 | -0.14      | 0                  | 39                                                                                                 | 0.0103335                               | R.LILEQMQK.D          | Oxidation (M)            | 13.99              |         |         |         |        |           |                  |                 |                  |                 |       |    |
|             |          |        |                   |         |       |                    |                                                                     | 534                                                          | 543    | 558.74 | 1115.47 | 1115.64 | -0.17      | 0                  | 52                                                                                                 | 0.0004907                               | K.LMDVGLAIAR.-        | Oxidation (M)            | 20.26              |         |         |         |        |           |                  |                 |                  |                 |       |    |
| P49368      | 11%      | 285    | 6                 | 61066   | 6.1   | P49368 TCPG_HUMAN  | T-complex protein 1 subunit gamma OS=Homo sapiens GN=CCT3 PE=1 SV=4 | 238                                                          | 248    | 640.27 | 1278.53 | 1278.71 | -0.18      | 0                  | 35                                                                                                 | 0.0225139                               | R.IVLLDSSLEYK.K       | 20.48                    | 24                 | 1       |         |         |        |           |                  |                 |                  |                 |       |    |
|             |          |        |                   |         |       |                    |                                                                     | 307                                                          | 313    | 379.67 | 757.33  | 757.44  | -0.11      | 0                  | 36                                                                                                 | 0.0261137                               | R.ANITAIR.R           |                          |                    |         | 13.43   |         |        |           |                  |                 |                  |                 |       |    |
|             |          |        |                   |         |       |                    |                                                                     | 371                                                          | 377    | 423.7  | 845.38  | 845.48  | -0.1       | 0                  | 43                                                                                                 | 0.0057683                               | K.ACTILLR.G           |                          |                    |         | 17.77   |         |        |           |                  |                 |                  |                 |       |    |
|             |          |        |                   |         |       |                    |                                                                     | 439                                                          | 449    | 583.77 | 1165.52 | 1165.68 | -0.16      | 0                  | 51                                                                                                 | 0.0005238                               | R.AVAQALEVIPR.T       |                          |                    |         | 19.79   |         |        |           |                  |                 |                  |                 |       |    |
|             |          |        |                   |         |       |                    |                                                                     | 450                                                          | 461    | 667.24 | 1332.47 | 1332.68 | -0.21      | 0                  | 51                                                                                                 | 0.0005934                               | R.TLIQNCGASTIR.L      |                          |                    |         | 15.06   |         |        |           |                  |                 |                  |                 |       |    |
|             |          |        |                   |         |       |                    |                                                                     | 508                                                          | 518    | 593.27 | 1184.53 | 1184.71 | -0.19      | 0                  | 70                                                                                                 | 8.87E-06                                | K.TAVETAVLLLR.I       |                          |                    |         | 21      |         |        |           |                  |                 |                  |                 |       |    |
|             |          |        |                   |         |       |                    |                                                                     | P49748                                                       | 7%     | 200    | 4       | 70745   | 8.9        | P49748 ACADV_HUMAN | Very long-chain specific acyl-CoA dehydrogenase, mitochondrial OS=Homo sapiens GN=ACADVL PE=1 SV=1 | 342                                     | 353                   | 614.69                   |                    |         | 1227.37 | 1227.57 | -0.21  | 0         | 56               | 0.0001312       | R.FGMAAALAGTMR.G | 2 Oxidation (M) | 14.78 | 24 |
| 460         | 469      | 589.23 | 1176.44           | 1176.61 | -0.18 | 0                  | 41                                                                  |                                                              |        |        |         |         |            |                    |                                                                                                    | 0.0055289                               | R.IFEGTNDILR.L        |                          | 19.87              |         |         |         |        |           |                  |                 |                  |                 |       |    |
| 539         | 550      | 653.26 | 1304.51           | 1304.7  | -0.19 | 0                  | 37                                                                  |                                                              |        |        |         |         |            |                    |                                                                                                    | 0.0143915                               | R.ALEQFATVVEAK.L      |                          | 20                 |         |         |         |        |           |                  |                 |                  |                 |       |    |
|             |          |        |                   |         |       |                    |                                                                     |                                                              |        |        |         |         |            |                    |                                                                                                    |                                         |                       |                          |                    |         |         |         |        |           |                  |                 |                  |                 |       |    |



| accession # | coverage | score | distinct peptides | mass  | pl  | start AA          | end AA                                                                      | m/z obs                                   | M obs   | M calc  | delta | miss | pept score | exp val  | peptide                                 | modifications            | retent time | Strongest gel slice | # gel slices found |  |
|-------------|----------|-------|-------------------|-------|-----|-------------------|-----------------------------------------------------------------------------|-------------------------------------------|---------|---------|-------|------|------------|----------|-----------------------------------------|--------------------------|-------------|---------------------|--------------------|--|
|             |          |       |                   |       |     | 557               | 567                                                                         | 658.78                                    | 1315.54 | 1315.72 | -0.19 | 0    | 66         | 1.93E-05 | K.GIVNEQFLLR.L                          |                          | 20.39       |                     |                    |  |
| P10809      | 35%      | 1027  | 19                | 61187 | 5.7 | P10809 CH60_HUMAN | 60 kDa heat shock protein, mitochondrial OS=Homo sapiens GN=HSPD1 PE=1 SV=2 | 97 121 853.96 2558.85 2559.24 -0.39 0 85  |         |         |       |      |            |          | 2.43E-07 K.LVQDVANNTNEEAGDGGTTTAVTLAR.S |                          | 19.18       | 25                  | 1                  |  |
|             |          |       |                   |       |     |                   |                                                                             | 206 218 760.77 1519.54 1519.74 -0.21 0 66 |         |         |       |      |            |          | 1.93E-05 K.TLNDELEIIIEG.MK.F            | Oxidation (M)            | 20.71       |                     |                    |  |
|             |          |       |                   |       |     |                   |                                                                             | 222 233 695.25 1388.49 1388.7 -0.21 0 58  |         |         |       |      |            |          | 0.0001107 R.GYISPYFINTSK.G              |                          | 20.1        |                     |                    |  |
|             |          |       |                   |       |     |                   |                                                                             | 251 268 640.26 1917.75 1918.06 -0.32 0 52 |         |         |       |      |            |          | 0.0003533 K.ISSIQIVPALEIANAHR.K         |                          | 20.84       |                     |                    |  |
|             |          |       |                   |       |     |                   |                                                                             | 293 301 456.72 911.43 911.58 -0.15 0 61   |         |         |       |      |            |          | 5.20E-05 K.VGLQVAVK.A                   |                          | 18.84       |                     |                    |  |
|             |          |       |                   |       |     |                   |                                                                             | 302 309 417.12 832.23 832.38 -0.15 0 34   |         |         |       |      |            |          | 0.0176663 K.APGFGDNR.K                  |                          | 12.79       |                     |                    |  |
|             |          |       |                   |       |     |                   |                                                                             | 345 359 549.55 1645.63 1645.9 -0.26 1 51  |         |         |       |      |            |          | 0.0004869 K.VGEVIVTKDDAMLLK.G           | Oxidation (M)            | 19.23       |                     |                    |  |
|             |          |       |                   |       |     |                   |                                                                             | 353 359 411.14 820.26 820.4 -0.14 0 31    |         |         |       |      |            |          | 0.0490034 K.DDAMLLK.G                   | Oxidation (M)            | 14.48       |                     |                    |  |
|             |          |       |                   |       |     |                   |                                                                             | 397 405 451.2 900.39 900.53 -0.14 0 34    |         |         |       |      |            |          | 0.0375994 K.LSDGVAVLK.V                 |                          | 16.8        |                     |                    |  |
|             |          |       |                   |       |     |                   |                                                                             | 406 417 617.21 1232.4 1232.59 -0.19 0 92  |         |         |       |      |            |          | 4.07E-08 K.VGGTSDVEVNEK.K               |                          | 12.66       |                     |                    |  |
|             |          |       |                   |       |     |                   |                                                                             | 421 429 480.68 959.34 959.5 -0.16 0 59    |         |         |       |      |            |          | 0.0001226 R.VTDALNATR.A                 |                          | 12.92       |                     |                    |  |
|             |          |       |                   |       |     |                   |                                                                             | 430 446 842.84 1683.67 1683.9 -0.23 0 52  |         |         |       |      |            |          | 0.0003988 R.AAVEEGIVLGGGCALLR.C         |                          | 20.62       |                     |                    |  |
|             |          |       |                   |       |     |                   |                                                                             | 447 462 886.28 1770.54 1770.85 -0.31 0 70 |         |         |       |      |            |          | 5.73E-06 R.CIPALDSLTPANEDQK.I           |                          | 20.01       |                     |                    |  |
|             |          |       |                   |       |     |                   |                                                                             | 463 469 393.19 784.37 784.51 -0.13 0 42   |         |         |       |      |            |          | 0.0047403 K.IGIEIIR.K                   |                          | 19.62       |                     |                    |  |
|             |          |       |                   |       |     |                   |                                                                             | 463 470 471.24 940.46 940.61 -0.15 1 36   |         |         |       |      |            |          | 0.0156848 K.IGIEIIR.KT                  |                          | 18.58       |                     |                    |  |
|             |          |       |                   |       |     |                   |                                                                             | 471 481 401.51 1201.51 1201.71 -0.2 1 57  |         |         |       |      |            |          | 0.0001618 R.TLKIPAMTIK.N                | Oxidation (M)            | 15.32       |                     |                    |  |
|             |          |       |                   |       |     |                   |                                                                             | 474 481 430.68 859.35 859.48 -0.14 0 56   |         |         |       |      |            |          | 0.0002317 K.IPAMTIK.N                   | Oxidation (M)            | 12.62       |                     |                    |  |
|             |          |       |                   |       |     |                   |                                                                             | 482 493 608.24 1214.46 1214.65 -0.19 0 48 |         |         |       |      |            |          | 0.0012056 K.NAGVEGSLIVEK.I              |                          | 18.49       |                     |                    |  |
|             |          |       |                   |       |     |                   |                                                                             | 517 523 372.16 742.3 742.42 -0.12 0 43    |         |         |       |      |            |          | 0.0040716 K.GIIDPTK.V                   |                          | 13.96       |                     |                    |  |
| P14618      | 21%      | 523   | 9                 | 58470 | 8   | P14618 KPVM_HUMAN | Pyruvate kinase isozymes M1/M2 OS=Homo sapiens GN=PKM2 PE=1 SV=4            | 33 43 599.24 1196.47 1196.64 -0.17 0 49   |         |         |       |      |            |          | 0.0008144 R.LDIDSPPTAR.N                |                          | 19.32       | 25                  | 1                  |  |
|             |          |       |                   |       |     |                   |                                                                             | 44 56 680.25 1358.48 1358.7 -0.22 0 62    |         |         |       |      |            |          | 4.32E-05 R.NTGIITGIPASR.S               |                          | 19.1        |                     |                    |  |
|             |          |       |                   |       |     |                   |                                                                             | 126 135 495.68 989.34 989.5 -0.16 0 59    |         |         |       |      |            |          | 0.0001062 K.GSGTAELVK.K                 |                          | 13.22       |                     |                    |  |
|             |          |       |                   |       |     |                   |                                                                             | 142 151 607.2 1212.38 1212.57 -0.19 0 45  |         |         |       |      |            |          | 0.001579 K.ITLDNAYMEK.C                 | Oxidation (M)            | 17.14       |                     |                    |  |
|             |          |       |                   |       |     |                   |                                                                             | 189 206 890.31 1778.61 1778.87 -0.26 0 82 |         |         |       |      |            |          | 3.31E-07 K.GADFLVTEVGGSLGSK.K           |                          | 20.67       |                     |                    |  |
|             |          |       |                   |       |     |                   |                                                                             | 208 224 818.83 1635.65 1635.88 -0.23 0 50 |         |         |       |      |            |          | 0.0007067 K.GVNLPGAADVLPVSEK.D          |                          | 20.19       |                     |                    |  |
|             |          |       |                   |       |     |                   |                                                                             | 295 305 571.22 1140.42 1140.6 -0.18 0 48  |         |         |       |      |            |          | 0.0009847 R.GDLGIEIPAEK.V               |                          | 19.66       |                     |                    |  |
|             |          |       |                   |       |     |                   |                                                                             | 423 433 611.23 1220.44 1220.63 -0.18 0 66 |         |         |       |      |            |          | 1.70E-05 K.CCSGAILVLT.KS                |                          | 19.36       |                     |                    |  |
|             |          |       |                   |       |     |                   |                                                                             | 490 498 498.17 994.32 994.49 -0.17 0 62   |         |         |       |      |            |          | 3.43E-05 R.VNFAMVVGK.A                  | Oxidation (M)            | 14.26       |                     |                    |  |
| P50990      | 17%      | 538   | 9                 | 60153 | 5.4 | P50990 TCPQ_HUMAN | T-complex protein 1 subunit theta OS=Homo sapiens GN=CCT8 PE=1 SV=4         | 2 7 353.65 705.29 705.42 -0.13 0 39       |         |         |       |      |            |          | 0.0094738 M.ALHVPK.A                    | Acetyl (Protein N-term)  | 14.61       | 25                  | 1                  |  |
|             |          |       |                   |       |     |                   |                                                                             | 63 74 667.28 1332.55 1332.74 -0.19 0 90   |         |         |       |      |            |          | 8.07E-08 K.LFVTDNDAATILR.E              |                          | 20.41       |                     |                    |  |
|             |          |       |                   |       |     |                   |                                                                             | 261 270 593.19 1184.37 1184.54 -0.16 0 61 |         |         |       |      |            |          | 5.35E-05 K.TAEELMNFSG.K                 | Oxidation (M)            | 16.01       |                     |                    |  |
|             |          |       |                   |       |     |                   |                                                                             | 282 296 686.78 1371.54 1371.74 -0.2 0 88  |         |         |       |      |            |          | 1.15E-07 K.AIADTGANVVVTGGK.V            |                          | 16.58       |                     |                    |  |
|             |          |       |                   |       |     |                   |                                                                             | 327 335 443.19 884.36 884.51 -0.15 0 39   |         |         |       |      |            |          | 0.0088911 K.TVAGATLPR.L                 |                          | 13.53       |                     |                    |  |
|             |          |       |                   |       |     |                   |                                                                             | 368 378 587.26 1172.51 1172.64 -0.13 0 44 |         |         |       |      |            |          | 0.0034734 K.EDGAISTIVLR.G               |                          | 19.84       |                     |                    |  |
|             |          |       |                   |       |     |                   |                                                                             | 391 400 533.19 1064.37 1064.51 -0.15 0 39 |         |         |       |      |            |          | 0.008595 R.AVDDGVNTFK.V                 |                          | 14.93       |                     |                    |  |
|             |          |       |                   |       |     |                   |                                                                             | 441 450 575.71 1149.41 1149.58 -0.18 0 63 |         |         |       |      |            |          | 3.12E-05 K.FAEAFEAIPR.A                 |                          | 19.97       |                     |                    |  |
|             |          |       |                   |       |     |                   |                                                                             | 510 520 564.75 1127.48 1127.67 -0.18 0 77 |         |         |       |      |            |          | 1.67E-06 K.LLATNAAVTVLR.V               |                          | 18.97       |                     |                    |  |
| P17987      | 12%      | 243   | 6                 | 60819 | 5.8 | P17987 TCPA_HUMAN | T-complex protein 1 subunit alpha OS=Homo sapiens GN=CCT1 PE=1 SV=1         | 1 11 633.19 1264.37 1264.58 -0.2 0 47     |         |         |       |      |            |          | 0.0011571 -.MEGPLSVFGDR.S               | Acetyl (Protein N-term); | 21.76       | 25                  | 1                  |  |
|             |          |       |                   |       |     |                   |                                                                             | 19 33 766.79 1531.57 1531.8 -0.23 0 59    |         |         |       |      |            |          | 7.68E-05 R.SQNVMAASIANIVK.S             | Oxidation (M)            | 19.71       |                     |                    |  |
|             |          |       |                   |       |     |                   |                                                                             | 190 199 573.74 1145.47 1145.64 -0.17 0 34 |         |         |       |      |            |          | 0.0302623 R.YPVNSVINLK.A                | Oxidation (M)            | 19.45       |                     |                    |  |
|             |          |       |                   |       |     |                   |                                                                             | 371 378 430.7 859.38 859.51 -0.14 0 33    |         |         |       |      |            |          | 0.0470952 R.TSASIILR.G                  |                          | 16.54       |                     |                    |  |
|             |          |       |                   |       |     |                   |                                                                             | 434 443 574.22 1146.43 1146.6 -0.18 0 33  |         |         |       |      |            |          | 0.0376584 R.EQLAIAEFAR.S                |                          | 20.14       |                     |                    |  |
|             |          |       |                   |       |     |                   |                                                                             | 516 526 603.25 1204.48 1204.68 -0.2 0 37  |         |         |       |      |            |          | 0.015931 K.FATEAATILR.I                 |                          | 20.27       |                     |                    |  |
| P40227      | 7%       | 159   | 4                 | 58444 | 6.2 | P40227 TCPZ_HUMAN | T-complex protein 1 subunit zeta OS=Homo sapiens GN=CCT6A PE=1 SV=3         | 130 138 538.72 1075.42 1075.59 -0.17 0 43 |         |         |       |      |            |          | 0.0041505 K.ALQFLEEVK.V                 |                          | 20.36       | 25                  | 1                  |  |
|             |          |       |                   |       |     |                   |                                                                             | 200 208 511.19 1020.36 1020.51 -0.15 0 39 |         |         |       |      |            |          | 0.0085376 K.SETDTSILR.G                 |                          | 14.39       |                     |                    |  |
|             |          |       |                   |       |     |                   |                                                                             | 296 307 631.74 1261.47 1261.66 -0.19 0 44 |         |         |       |      |            |          | 0.0029372 K.GIDPFLDLSK.E                |                          | 21.19       |                     |                    |  |
|             |          |       |                   |       |     |                   |                                                                             | 308 314 379.16 756.31 756.45 -0.14 0 33   |         |         |       |      |            |          | 0.037295 K.EGIVALR.R                    |                          | 16.76       |                     |                    |  |
| P48643      | 7%       | 207   | 4                 | 60089 | 5.5 | P48643 TCPE_HUMAN | T-complex protein 1 subunit epsilon OS=Homo sapiens GN=CCT5 PE=1 SV=1       | 28 35 445.68 889.36 889.49 -0.14 0 40     |         |         |       |      |            |          | 0.0096886 R.LMGLEALK.S                  | Oxidation (M)            | 19.05       | 25                  | 1                  |  |
|             |          |       |                   |       |     |                   |                                                                             | 133 142 547.19 1092.36 1092.52 -0.16 0 76 |         |         |       |      |            |          | 1.71E-06 R.IADGYEQAAR.V                 |                          | 13.01       |                     |                    |  |
|             |          |       |                   |       |     |                   |                                                                             | 345 352 462.67 923.32 923.46 -0.14 0 52   |         |         |       |      |            |          | 0.0003424 R.FSELTAEK.L                  |                          | 13.91       |                     |                    |  |
|             |          |       |                   |       |     |                   |                                                                             | 515 525 645.74 1289.47 1289.68 -0.21 0 41 |         |         |       |      |            |          | 0.0058424 K.QQISLATQMVR.M               | Oxidation (M)            | 15.84       |                     |                    |  |
|             |          |       |                   |       |     |                   |                                                                             |                                           |         |         |       |      |            |          |                                         |                          |             |                     |                    |  |



|     |     |        |         |         |       |   |    |           |                    |       |
|-----|-----|--------|---------|---------|-------|---|----|-----------|--------------------|-------|
| 51  | 64  | 714.76 | 1427.5  | 1427.7  | -0.2  | 0 | 56 | 0.0001658 | R.SLYASSPGGVYATR.S | 18.7  |
| 130 | 139 | 585.27 | 1168.53 | 1168.71 | -0.18 | 0 | 48 | 0.001109  | K.ILLAELEQLK.G     | 20.96 |
| 208 | 217 | 544.68 | 1087.35 | 1087.53 | -0.17 | 0 | 74 | 3.06E-06  | R.QDVDNASLAR.L     | 12.8  |
| 274 | 282 | 512.17 | 1022.33 | 1022.5  | -0.18 | 0 | 39 | 0.0074955 | R.QQYESVAAK.N      | 12.32 |
| 295 | 304 | 547.19 | 1092.36 | 1092.52 | -0.16 | 0 | 71 | 5.51E-06  | K.FADLSEANR.N      | 16.19 |

| accession # | coverage | score | distinct peptides | mass  | pI  | start AA           | end AA                                                                               | m/z obs | M obs   | M calc  | delta | miss | pept score | exp val   | peptide             | modifications                          | retent time | Strongest gel slice | # gel slices found |
|-------------|----------|-------|-------------------|-------|-----|--------------------|--------------------------------------------------------------------------------------|---------|---------|---------|-------|------|------------|-----------|---------------------|----------------------------------------|-------------|---------------------|--------------------|
| Q01518      | 9%       | 215   | 4                 | 52222 | 8.3 | Q01518 CAP1_HUMAN  | Adenylyl cyclase-associated protein 1 OS=Homo sapiens GN=CAP1 PE=1 SV=4              |         |         |         |       |      |            |           |                     |                                        | 27          | 1                   |                    |
|             |          |       |                   |       |     | 2                  | 10                                                                                   | 567.18  | 1132.34 | 1132.52 | -0.18 | 0    | 41         | 0.0044919 | M.ADMQNLVER.L       | Acetyl (Protein N-term); Oxidation (M) | 15.95       |                     |                    |
|             |          |       |                   |       |     | 101                | 113                                                                                  | 713.8   | 1425.59 | 1425.81 | -0.22 | 0    | 53         | 0.0003826 | K.LSDLLAPISEQIK.E   |                                        | 20.74       |                     |                    |
|             |          |       |                   |       |     | 156                | 167                                                                                  | 747.7   | 1493.38 | 1493.59 | -0.21 | 0    | 72         | 1.95E-06  | K.EMNDAAMFYTN.R.V   | 2 Oxidation (M)                        | 16.58       |                     |                    |
|             |          |       |                   |       |     | 423                | 433                                                                                  | 618.21  | 1234.41 | 1234.59 | -0.17 | 0    | 49         | 0.0008975 | K.NSLDCEIVSAK.S     |                                        | 18.13       |                     |                    |
| P50995      | 9%       | 159   | 4                 | 54697 | 7.5 | P50995 ANX11_HUMAN | Annexin A11 OS=Homo sapiens GN=ANXA11 PE=1 SV=1                                      |         |         |         |       |      |            |           |                     |                                        | 27          | 1                   |                    |
|             |          |       |                   |       |     | 192                | 204                                                                                  | 680.26  | 1358.5  | 1358.68 | -0.19 | 0    | 39         | 0.0090585 | R.GTITDAPGFPLR.D    |                                        | 20.22       |                     |                    |
|             |          |       |                   |       |     | 256                | 264                                                                                  | 505.66  | 1009.31 | 1009.47 | -0.16 | 0    | 31         | 0.0421491 | K.SELSGNFKE.T       |                                        | 13.97       |                     |                    |
|             |          |       |                   |       |     | 347                | 359                                                                                  | 741.21  | 1480.41 | 1480.65 | -0.24 | 0    | 50         | 0.000427  | R.DESTNVDSLQQR.D    | Oxidation (M)                          | 14.76       |                     |                    |
|             |          |       |                   |       |     | 462                | 470                                                                                  | 531.19  | 1060.37 | 1060.54 | -0.17 | 0    | 42         | 0.0043862 | R.SETDLLDIR.S       |                                        | 20.05       |                     |                    |
| O43175      | 9%       | 208   | 4                 | 57356 | 6.3 | O43175 SERA_HUMAN  | D-3-phosphoglycerate dehydrogenase OS=Homo sapiens GN=PHGDH PE=1 SV=4                |         |         |         |       |      |            |           |                     |                                        | 27          | 1                   |                    |
|             |          |       |                   |       |     | 59                 | 69                                                                                   | 565.72  | 1129.42 | 1129.6  | -0.18 | 0    | 62         | 4.85E-05  | K.VTADVINAEEK.L     |                                        | 14.81       |                     |                    |
|             |          |       |                   |       |     | 76                 | 90                                                                                   | 744.76  | 1487.5  | 1487.72 | -0.22 | 0    | 75         | 2.26E-06  | R.AGTGVDNVDLEAATR.K |                                        | 18.96       |                     |                    |
|             |          |       |                   |       |     | 147                | 155                                                                                  | 450.21  | 898.41  | 898.56  | -0.15 | 0    | 36         | 0.0190221 | K.TLGILGLGR.I       |                                        | 20.57       |                     |                    |
|             |          |       |                   |       |     | 237                | 247                                                                                  | 550.22  | 1098.43 | 1098.6  | -0.17 | 0    | 35         | 0.0221602 | R.GGIVDEGALLR.A     |                                        | 19.79       |                     |                    |
| Q9UHL4      | 9%       | 192   | 4                 | 54749 | 5.9 | Q9UHL4 DPP2_HUMAN  | Dipeptidyl-peptidase 2 OS=Homo sapiens GN=DPP7 PE=1 SV=2                             |         |         |         |       |      |            |           |                     |                                        | 27          | 2                   |                    |
|             |          |       |                   |       |     | 113                | 123                                                                                  | 596.25  | 1190.49 | 1190.6  | -0.12 | 0    | 54         | 0.0002832 | K.SLPLFGAQSTQR.G    |                                        | 17.7        |                     |                    |
|             |          |       |                   |       |     | 204                | 215                                                                                  | 647.2   | 1292.38 | 1292.59 | -0.2  | 0    | 63         | 2.83E-05  | R.DVTADFEGQSPK.C    |                                        | 18.74       |                     |                    |
|             |          |       |                   |       |     | 229                | 240                                                                                  | 699.26  | 1396.51 | 1396.7  | -0.19 | 0    | 34         | 0.03053   | K.DLFLQAGYDTRV.W    |                                        | 20.92       |                     |                    |
|             |          |       |                   |       |     | 296                | 302                                                                                  | 408.66  | 815.31  | 815.45  | -0.14 | 0    | 41         | 0.0076777 | R.LLSEAQR.I         |                                        | 12.49       |                     |                    |
| P01857      | 6%       | 78    | 2                 | 36596 | 8.5 | P01857 IGHG1_HUMAN | Ig gamma-1 chain C region OS=Homo sapiens GN=IGHG1 PE=1 SV=1                         |         |         |         |       |      |            |           |                     |                                        | 27          | 2                   |                    |
|             |          |       |                   |       |     | 5                  | 16                                                                                   | 593.74  | 1185.47 | 1185.64 | -0.17 | 0    | 46         | 0.0019723 | K.GPSVFLPAPSSK.S    |                                        | 19.74       |                     |                    |
|             |          |       |                   |       |     | 132                | 138                                                                                  | 426.14  | 850.27  | 850.42  | -0.15 | 0    | 32         | 0.0328346 | K.DTLMISR.T         | Oxidation (M)                          | 14.01       |                     |                    |
| P30101      | 5%       | 97    | 2                 | 57146 | 6   | P30101 PDIA3_HUMAN | Protein disulfide-isomerase A3 OS=Homo sapiens GN=PDIA3 PE=1 SV=4                    |         |         |         |       |      |            |           |                     |                                        | 27          | 1                   |                    |
|             |          |       |                   |       |     | 63                 | 73                                                                                   | 596.22  | 1190.43 | 1190.59 | -0.17 | 0    | 64         | 3.25E-05  | R.LAPEYEAATR.L      |                                        | 13.92       |                     |                    |
|             |          |       |                   |       |     | 367                | 379                                                                                  | 684.73  | 1367.44 | 1367.66 | -0.22 | 0    | 33         | 0.0272507 | K.SEPIPESNDGPVK.V   |                                        | 13.75       |                     |                    |
| P21281      | 4%       | 91    | 2                 | 56807 | 5.6 | P21281 VATB2_HUMAN | Vacuolar ATP synthase subunit B, brain isoform OS=Homo sapiens GN=ATP6V1B2 PE=1 SV=3 |         |         |         |       |      |            |           |                     |                                        | 27          | 1                   |                    |
|             |          |       |                   |       |     | 83                 | 93                                                                                   | 545.7   | 1089.39 | 1089.57 | -0.17 | 0    | 44         | 0.0032995 | R.SGQVLEVSGSK.A     |                                        | 13.23       |                     |                    |
|             |          |       |                   |       |     | 121                | 130                                                                                  | 560.68  | 1119.34 | 1119.52 | -0.18 | 0    | 47         | 0.0012224 | R.TPVSDEMLGR.V      | Oxidation (M)                          | 13.32       |                     |                    |
| P14868      | 4%       | 99    | 2                 | 57499 | 6.1 | P14868 SYDC_HUMAN  | Aspartyl-tRNA synthetase, cytoplasmic OS=Homo sapiens GN=DARS PE=1 SV=2              |         |         |         |       |      |            |           |                     |                                        | 27          | 1                   |                    |
|             |          |       |                   |       |     | 189                | 197                                                                                  | 498.67  | 995.32  | 995.5   | -0.18 | 0    | 42         | 0.0030733 | R.TSTSQAVFR.L       |                                        | 13.27       |                     |                    |
|             |          |       |                   |       |     | 321                | 330                                                                                  | 604.22  | 1206.43 | 1206.62 | -0.19 | 0    | 57         | 0.0001411 | R.FQTEIQTVNNK.Q     |                                        | 14.63       |                     |                    |
| P00367      | 4%       | 96    | 2                 | 61701 | 7.7 | P00367 DHE3_HUMAN  | Glutamate dehydrogenase 1, mitochondrial OS=Homo sapiens GN=GLUD1 PE=1 SV=2          |         |         |         |       |      |            |           |                     |                                        | 27          | 2                   |                    |
|             |          |       |                   |       |     | 152                | 162                                                                                  | 621.2   | 1240.39 | 1240.58 | -0.19 | 0    | 49         | 0.0006272 | R.YSTDVSVDEVK.A     |                                        | 16.28       |                     |                    |
|             |          |       |                   |       |     | 536                | 545                                                                                  | 540.21  | 1078.4  | 1078.57 | -0.16 | 0    | 47         | 0.0015722 | R.TAAYVNAIEK.V      |                                        | 14.92       |                     |                    |
| P34897      | 4%       | 80    | 2                 | 56414 | 8.8 | P34897 GLYM_HUMAN  | Serine hydroxymethyltransferase, mitochondrial OS=Homo sapiens GN=SHMT2 PE=1 SV=3    |         |         |         |       |      |            |           |                     |                                        | 27          | 1                   |                    |
|             |          |       |                   |       |     | 417                | 425                                                                                  | 436.18  | 870.35  | 870.49  | -0.14 | 0    | 38         | 0.0140539 | R.SAITPGGLR.L       |                                        | 13.88       |                     |                    |
|             |          |       |                   |       |     | 426                | 434                                                                                  | 443.19  | 884.36  | 884.51  | -0.15 | 0    | 43         | 0.0039731 | R.LGAPALTSR.Q       |                                        | 14.27       |                     |                    |
| P78371      | 3%       | 82    | 2                 | 57794 | 6   | P78371 TCPB_HUMAN  | T-complex protein 1 subunit beta OS=Homo sapiens GN=CCT2 PE=1 SV=4                   |         |         |         |       |      |            |           |                     |                                        | 27          | 1                   |                    |
|             |          |       |                   |       |     | 182                | 189                                                                                  | 435.7   | 869.39  | 869.53  | -0.14 | 0    | 48         | 0.001009  | K.LAVEAVLR.L        |                                        | 19.44       |                     |                    |
|             |          |       |                   |       |     | 224                | 230                                                                                  | 378.15  | 754.29  | 754.43  | -0.14 | 0    | 34         | 0.0205102 | K.IGVNQP.K.R        |                                        | 12.28       |                     |                    |
| Q99541      | 29%      | 582   | 10                | 48274 | 6.3 | Q99541 ADFP_HUMAN  | Adipophilin OS=Homo sapiens GN=ADFP PE=1 SV=2                                        |         |         |         |       |      |            |           |                     |                                        | 28          | 2                   |                    |
|             |          |       |                   |       |     | 2                  | 15                                                                                   | 734.28  | 1466.54 | 1466.77 | -0.23 | 0    | 33         | 0.0357741 | M.ASVAVDPQPSVTR.V   | Acetyl (Protein N-term)                | 19.36       |                     |                    |



| accession # | coverage | score | distinct peptides | mass  | pI  | start AA | end AA       | m/z obs                                     | M obs           | M calc    | delta | miss | pept score | exp val   | peptide             | modifications           | retent time | Strongest gel slice | # gel slices found |
|-------------|----------|-------|-------------------|-------|-----|----------|--------------|---------------------------------------------|-----------------|-----------|-------|------|------------|-----------|---------------------|-------------------------|-------------|---------------------|--------------------|
|             |          |       |                   |       |     | 77       | 85           | 461.14                                      | 920.27          | 920.44    | -0.17 | 0    | 48         | 0.0008035 | R.TALAMGADR.G       | Oxidation (M)           | 12.23       |                     |                    |
|             |          |       |                   |       |     | 99       | 106          | 427.2                                       | 852.39          | 852.52    | -0.13 | 0    | 33         | 0.0276667 | R.LGPLQVAR.V        |                         | 17.3        |                     |                    |
| P51148      | 23%      | 226   | 4                 | 23696 | 8.6 | P51148   | RAB5C_HUMAN  | Ras-related protein Rab-5C                  | OS=Homo sapiens | GN=RAB5C  | PE=1  | SV=2 |            |           |                     | modifications           | retent time | Strongest gel slice | # gel slices found |
|             |          |       |                   |       |     | 24       | 34           | 543.24                                      | 1084.47         | 1084.65   | -0.18 | 0    | 40         | 0.0086731 | K.LVLLGESAVGK.S     |                         | 19.68       | 37                  | 1                  |
|             |          |       |                   |       |     | 122      | 135          | 698.28                                      | 1394.54         | 1394.79   | -0.25 | 0    | 53         | 0.0003245 | R.QASPNIVIALAGNK.A  |                         | 20.07       |                     |                    |
|             |          |       |                   |       |     | 185      | 196          | 606.18                                      | 1210.35         | 1210.57   | -0.22 | 0    | 65         | 1.36E-05  | K.NEPQNAATGAPGR.N   |                         | 11.93       |                     |                    |
|             |          |       |                   |       |     | 199      | 210          | 650.21                                      | 1298.4          | 1298.62   | -0.22 | 0    | 68         | 7.73E-06  | R.GVDLQENNPASR.S    |                         | 13.51       |                     |                    |
| Q92520      | 17%      | 202   | 4                 | 24950 | 8.5 | Q92520   | FAM3C_HUMAN  | Protein FAM3C                               | OS=Homo sapiens | GN=FAM3C  | PE=1  | SV=1 |            |           |                     | modifications           | retent time | Strongest gel slice | # gel slices found |
|             |          |       |                   |       |     | 31       | 41           | 605.71                                      | 1209.4          | 1209.58   | -0.18 | 0    | 61         | 4.44E-05  | K.MDASLGNLFR.S      | Oxidation (M)           | 20.28       | 37                  | 1                  |
|             |          |       |                   |       |     | 42       | 49           | 402.64                                      | 803.27          | 803.41    | -0.14 | 0    | 35         | 0.0303576 | R.SALDTAAR.S        |                         | 12.61       |                     |                    |
|             |          |       |                   |       |     | 73       | 84           | 559.19                                      | 1116.37         | 1116.56   | -0.19 | 0    | 66         | 1.92E-05  | K.MASGAANVVGPK.I    | Oxidation (M)           | 12.52       |                     |                    |
|             |          |       |                   |       |     | 113      | 120          | 431.65                                      | 861.29          | 861.44    | -0.16 | 0    | 40         | 0.0070738 | K.TGEVLDTK.Y        |                         | 12.88       |                     |                    |
| P20340      | 13%      | 95    | 2                 | 23692 | 5.4 | P20340   | RAB6A_HUMAN  | Ras-related protein Rab-6A                  | OS=Homo sapiens | GN=RAB6A  | PE=1  | SV=3 |            |           |                     | modifications           | retent time | Strongest gel slice | # gel slices found |
|             |          |       |                   |       |     | 2        | 13           | 645.73                                      | 1289.45         | 1289.64   | -0.18 | 1    | 61         | 5.90E-05  | M.STGGDFGNPLRK.F    | Acetyl (Protein N-term) | 18.87       | 37                  | 1                  |
|             |          |       |                   |       |     | 170      | 183          | 731.22                                      | 1460.43         | 1460.69   | -0.27 | 0    | 35         | 0.0190628 | R.VAAALPGMESTQDR.S  | Oxidation (M)           | 13.91       |                     |                    |
| Q06830      | 11%      | 90    | 2                 | 22324 | 8.3 | Q06830   | PRDX1_HUMAN  | Peroxiredoxin-1                             | OS=Homo sapiens | GN=PRDX1  | PE=1  | SV=1 |            |           |                     | modifications           | retent time | Strongest gel slice | # gel slices found |
|             |          |       |                   |       |     | 17       | 27           | 590.71                                      | 1179.4          | 1179.56   | -0.16 | 0    | 43         | 0.0029224 | K.ATAVMPDGGQFK.D    | Oxidation (M)           | 13.55       | 37                  | 1                  |
|             |          |       |                   |       |     | 141      | 151          | 606.24                                      | 1210.47         | 1210.67   | -0.2  | 0    | 47         | 0.0013007 | R.QITVNDLPVGR.S     |                         | 19.37       |                     |                    |
| P62826      | 10%      | 74    | 2                 | 24579 | 7   | P62826   | RAN_HUMAN    | GTP-binding nuclear protein Ran             | OS=Homo sapiens | GN=RAN    | PE=1  | SV=3 |            |           |                     | modifications           | retent time | Strongest gel slice | # gel slices found |
|             |          |       |                   |       |     | 2        | 12           | 622.71                                      | 1243.4          | 1243.62   | -0.22 | 0    | 33         | 0.0370374 | M.AAQGEPQVQFK.L     | Acetyl (Protein N-term) | 19.16       | 37                  | 1                  |
|             |          |       |                   |       |     | 13       | 23           | 508.21                                      | 1014.4          | 1014.57   | -0.17 | 0    | 43         | 0.0046027 | K.LVLVLDGGGTGK.T    |                         | 16.1        |                     |                    |
| Q15907      | 8%       | 81    | 2                 | 24588 | 5.6 | Q15907   | RAB11B_HUMAN | Ras-related protein Rab-11B                 | OS=Homo sapiens | GN=RAB11B | PE=1  | SV=4 |            |           |                     | modifications           | retent time | Strongest gel slice | # gel slices found |
|             |          |       |                   |       |     | 42       | 51           | 540.69                                      | 1079.37         | 1079.56   | -0.19 | 0    | 49         | 0.0007882 | R.KSTIGVEFATR.S     |                         | 19.2        | 37                  | 1                  |
|             |          |       |                   |       |     | 75       | 82           | 472.66                                      | 943.31          | 943.48    | -0.17 | 0    | 32         | 0.041477  | R.AITSAYYR.G        |                         | 14.37       |                     |                    |
| P00403      | 6%       | 82    | 2                 | 25719 | 4.7 | P00403   | COX2_HUMAN   | Cytochrome c oxidase subunit 2              | OS=Homo sapiens | GN=MT-CO2 | PE=1  | SV=1 |            |           |                     | modifications           | retent time | Strongest gel slice | # gel slices found |
|             |          |       |                   |       |     | 135      | 141          | 422.66                                      | 843.3           | 843.45    | -0.15 | 0    | 47         | 0.0014348 | R.LLDVDNR.V         |                         | 14.16       | 39                  | 1                  |
|             |          |       |                   |       |     | 172      | 178          | 365.14                                      | 728.26          | 728.38    | -0.13 | 0    | 35         | 0.0182001 | K.TDAIPGR.L         |                         | 12.61       |                     |                    |
| P61204      | 24%      | 213   | 4                 | 20645 | 6.8 | P61204   | ARF3_HUMAN   | ADP-ribosylation factor 3                   | OS=Homo sapiens | GN=ARF3   | PE=1  | SV=2 |            |           |                     | modifications           | retent time | Strongest gel slice | # gel slices found |
|             |          |       |                   |       |     | 20       | 30           | 552.24                                      | 1102.46         | 1102.61   | -0.15 | 0    | 54         | 0.0003262 | R.ILMVGLDAAGK.T     | Oxidation (M)           | 19.19       | 41                  | 1                  |
|             |          |       |                   |       |     | 110      | 117          | 496.65                                      | 991.29          | 991.46    | -0.17 | 0    | 39         | 0.0078939 | R.MLAEDLR.D         | Oxidation (M)           | 14.11       |                     |                    |
|             |          |       |                   |       |     | 118      | 127          | 545.28                                      | 1088.55         | 1088.62   | -0.07 | 0    | 42         | 0.0049603 | R.DAVLLVFANK.Q      |                         | 20.93       |                     |                    |
|             |          |       |                   |       |     | 128      | 142          | 823.74                                      | 1645.47         | 1645.76   | -0.29 | 0    | 78         | 8.76E-07  | K.QDLPNAMNAAEITDK.L | Oxidation (M)           | 18.58       |                     |                    |
| P23528      | 14%      | 132   | 2                 | 18719 | 8.2 | P23528   | COF1_HUMAN   | Cofilin-1                                   | OS=Homo sapiens | GN=CFL1   | PE=1  | SV=3 |            |           |                     | modifications           | retent time | Strongest gel slice | # gel slices found |
|             |          |       |                   |       |     | 2        | 13           | 572.72                                      | 1143.42         | 1143.61   | -0.19 | 0    | 86         | 1.90E-07  | M.ASGVAVSDGVK.V     | Acetyl (Protein N-term) | 19.49       | 41                  | 1                  |
|             |          |       |                   |       |     | 82       | 92           | 669.19                                      | 1336.36         | 1336.62   | -0.26 | 0    | 45         | 0.0012067 | R.YALYDATYETK.E     |                         | 19.23       |                     |                    |
| P59998      | 11%      | 113   | 2                 | 19768 | 8.5 | P59998   | ARPC4_HUMAN  | Actin-related protein 2/3 complex subunit 4 | OS=Homo sapiens | GN=ARPC4  | PE=1  | SV=3 |            |           |                     | modifications           | retent time | Strongest gel slice | # gel slices found |
|             |          |       |                   |       |     | 61       | 71           | 593.75                                      | 1185.48         | 1185.67   | -0.19 | 0    | 68         | 1.21E-05  | K.VLIEGSINSVR.V     |                         | 19.06       | 41                  | 1                  |
|             |          |       |                   |       |     | 98       | 105          | 505.18                                      | 1008.35         | 1008.54   | -0.19 | 0    | 45         | 0.0017958 | R.AENFFILR.R        |                         | 20.59       |                     |                    |

| accession # | coverage | score | distinct peptides | mass  | pI  | start AA                                                                                      | end AA | m/z obs | M obs   | M calc  | delta | miss | pept score | exp val   | peptide            | modifications | retent time | Strongest gel slice | # gel slices found |
|-------------|----------|-------|-------------------|-------|-----|-----------------------------------------------------------------------------------------------|--------|---------|---------|---------|-------|------|------------|-----------|--------------------|---------------|-------------|---------------------|--------------------|
| P61604      | 48%      | 283   | 5                 | 10925 | 8.9 | P61604 CH10_HUMAN 10 kDa heat shock protein, mitochondrial OS=Homo sapiens GN=HSPE1 PE=1 SV=2 |        |         |         |         |       |      |            |           |                    |               |             |                     |                    |
|             |          |       |                   |       |     | 29                                                                                            | 36     | 430.66  | 859.3   | 859.45  | -0.15 | 0    | 49         | 0.0010728 | K.GGIMLPEK.S       | Oxidation (M) | 15.12       | 43                  | 1                  |
|             |          |       |                   |       |     | 41                                                                                            | 54     | 658.4   | 1314.79 | 1314.75 | 0.03  | 0    | 94         | 3.03E-08  | K.VLQATVVAVGSGSK.G |               | 17.21       |                     |                    |
|             |          |       |                   |       |     | 57                                                                                            | 66     | 507.19  | 1012.37 | 1012.56 | -0.18 | 0    | 42         | 0.0041394 | K.GGEIQVSVK.V      |               | 13.4        |                     |                    |
|             |          |       |                   |       |     | 71                                                                                            | 80     | 538.71  | 1075.41 | 1075.59 | -0.18 | 0    | 51         | 0.0005506 | K.VLLPEYGGTK.V     |               | 19.01       |                     |                    |
|             |          |       |                   |       |     | 93                                                                                            | 99     | 359.15  | 716.28  | 716.37  | -0.09 | 0    | 48         | 0.0017649 | R.DGDILGK.Y        |               | 13.93       |                     |                    |
| P31949      | 27%      | 173   | 3                 | 11847 | 6.6 | P31949 S10AB_HUMAN Protein S100-A11 OS=Homo sapiens GN=S100A11 PE=1 SV=2                      |        |         |         |         |       |      |            |           |                    |               |             |                     |                    |
|             |          |       |                   |       |     | 4                                                                                             | 12     | 510.17  | 1018.32 | 1018.49 | -0.18 | 0    | 47         | 0.0015478 | K.ISSPTETER.C      |               | 12.29       | 43                  | 1                  |
|             |          |       |                   |       |     | 28                                                                                            | 36     | 530.66  | 1059.31 | 1059.49 | -0.18 | 0    | 39         | 0.0072227 | K.DGYNYLTK.T       |               | 16.35       |                     |                    |
|             |          |       |                   |       |     | 53                                                                                            | 62     | 381.14  | 1140.4  | 1140.59 | -0.19 | 1    | 58         | 0.0001007 | K.NQKDPGVLDLR.M    |               | 12.38       |                     |                    |

**\*Footnotes to Supplemental Table 5:**

Data sets were searched with the Mascot search engine (see Perkins et al. (1999) *Electrophoresis* **20**, 3551-3567).

Detailed are the SwissProt accession number, the number of distinct proteolytic peptides (in some cases the number of observed redundant peptide sequences is indicated in parentheses), and the sequence coverage of the protein (%).

Listed is the Mascot protein score as well as the score and expectation value for the individual peptides.

Additional columns indicate the position of the protein in the 1D-SDS PAGE gel (strongest gel slice in which the protein was identified, and the total # of adjacent gel slices in which the protein was found).

Proteins identified by single-peptide assignments for this experiment are not listed in this Table but in Supplemental Table 12.

**Supplemental Table 6. Proteins identified by HPLC-MS/MS in 3-day BCG human THP-1 phagosome preparation (a).<sup>a</sup>**

ESI-MS/MS raw data obtained on a QSTAR Pulsar i instrument and Mascot search results for trypsin digestion of proteins separated on a 1D-SDS PAGE gel.  
For summary see Supplemental Table 1

| accession # | coverage | score | distinct peptides | mass   | pl  | start AA | end AA      | m/z obs                                              | M obs                               | M calc | delta | miss | pept score | exp val | peptide | modifications | retent time | Strongest gel slice | # gel slices found |     |      |        |         |         |         |      |    |           |                        |                      |       |
|-------------|----------|-------|-------------------|--------|-----|----------|-------------|------------------------------------------------------|-------------------------------------|--------|-------|------|------------|---------|---------|---------------|-------------|---------------------|--------------------|-----|------|--------|---------|---------|---------|------|----|-----------|------------------------|----------------------|-------|
| P05023      | 7%       | 291   | 6                 | 114135 | 5.3 | P05023   | AT1A1_HUMAN | Sodium/potassium-transporting ATPase subunit alpha-1 | OS=Homo sapiens GN=ATP1A1 PE=1 SV=1 |        |       |      |            |         |         |               |             |                     | 1                  | 3   |      |        |         |         |         |      |    |           |                        |                      |       |
|             |          |       |                   |        |     |          |             |                                                      |                                     |        |       |      |            |         |         |               |             |                     |                    |     | 68   | 74     | 372.24  | 742.46  | 742.43  | 0.02 | 0  | 52        | 0.0004802              | R.AAEILAR.D          | 21.06 |
|             |          |       |                   |        |     |          |             |                                                      |                                     |        |       |      |            |         |         |               |             |                     |                    |     | 213  | 227    | 810.44  | 1618.86 | 1618.74 | 0.12 | 0  | 67        | 1.36E-05               | K.VDNSSLTGESEPOQTR.S | 20.37 |
|             |          |       |                   |        |     |          |             |                                                      |                                     |        |       |      |            |         |         |               |             |                     |                    |     | 228  | 240    | 760.47  | 1518.92 | 1518.7  | 0.22 | 0  | 46        | 0.0015284              | R.SPFDFTNENPLETR.N   | 28.37 |
|             |          |       |                   |        |     |          |             |                                                      |                                     |        |       |      |            |         |         |               |             |                     |                    |     | 446  | 458    | 616.41  | 1230.8  | 1230.65 | 0.15 | 0  | 34        | 0.0343401              | R.VAVAGDASESALLK.C   | 26.88 |
|             |          |       |                   |        |     |          |             |                                                      |                                     |        |       |      |            |         |         |               |             |                     |                    |     | 477  | 487    | 631.42  | 1260.82 | 1260.67 | 0.15 | 0  | 47        | 0.0015501              | K.IVEIPFNSTNK.Y      | 28.67 |
|             |          |       |                   |        |     |          |             |                                                      |                                     |        |       |      |            |         |         |               |             |                     |                    |     | 648  | 658    | 618.92  | 1235.83 | 1235.7  | 0.13 | 0  | 45        | 0.0022316              | R.LNIPVSVQVNP.R.D    | 27.53 |
| Q12913      | 2%       | 90    | 2                 | 147048 | 5.4 | Q12913   | PTPRJ_HUMAN | Receptor-type tyrosine-protein phosphatase eta       | OS=Homo sapiens GN=PTPRJ PE=1 SV=3  |        |       |      |            |         |         |               |             |                     | 1                  | 1   |      |        |         |         |         |      |    |           |                        |                      |       |
|             |          |       |                   |        |     |          |             |                                                      |                                     |        |       |      |            |         |         |               |             |                     |                    |     | 113  | 126    | 716.97  | 1431.92 | 1431.72 | 0.2  | 0  | 44        | 0.0030437              | K.TPSSTGPPSPVFDIK.A  | 28.81 |
|             |          |       |                   |        |     |          |             |                                                      |                                     |        |       |      |            |         |         |               |             |                     |                    |     | 1246 | 1254   | 497.31  | 992.6   | 992.53  | 0.07 | 0  | 47        | 0.0015536              | R.TGTFIAIDR.L        | 28.28 |
|             |          |       |                   |        |     |          |             |                                                      |                                     |        |       |      |            |         |         |               |             |                     |                    |     |      |        |         |         |         |      |    |           |                        |                      |       |
| P35579      | 3%       | 176   | 5                 | 227646 | 5.5 | P35579   | MYH9_HUMAN  | Myosin-9                                             | OS=Homo sapiens GN=MYH9 PE=1 SV=4   |        |       |      |            |         |         |               |             |                     | 2                  | 3   |      |        |         |         |         |      |    |           |                        |                      |       |
|             |          |       |                   |        |     |          |             |                                                      |                                     |        |       |      |            |         |         |               |             |                     |                    |     | 290  | 299    | 603.34  | 1204.67 | 1204.63 | 0.04 | 0  | 35        | 0.025854               | K.TDLLLEPYNK.Y       | 28.99 |
|             |          |       |                   |        |     |          |             |                                                      |                                     |        |       |      |            |         |         |               |             |                     |                    |     | 359  | 373    | 804.4   | 1606.79 | 1606.69 | 0.1  | 0  | 42        | 0.0037663              | R.NTDQASMPDNTAAQK.V  | 16.61 |
|             |          |       |                   |        |     |          |             |                                                      |                                     |        |       |      |            |         |         |               |             |                     |                    |     | 712  | 718    | 462.77  | 923.52  | 923.49  | 0.03 | 0  | 33        | 0.0298492              | R.VVVFQEFR.Q         | 27.96 |
|             |          |       |                   |        |     |          |             |                                                      |                                     |        |       |      |            |         |         |               |             |                     |                    |     | 738  | 745    | 489.78  | 977.55  | 977.5   | 0.05 | 0  | 35        | 0.0246192              | K.QACVLMIK.A         | 26.31 |
|             |          |       |                   |        |     |          |             |                                                      |                                     |        |       |      |            |         |         |               |             |                     |                    |     | 746  | 755    | 597.36  | 1192.7  | 1192.61 | 0.09 | 0  | 34        | 0.0303625              | K.ALELDSNLYR.I       | 28.56 |
| P46940      | 3%       | 165   | 4                 | 189761 | 6.1 | P46940   | IQGA1_HUMAN | Ras GTPase-activating-like protein IQGAP1            | OS=Homo sapiens GN=IQGA1 PE=1 SV=1  |        |       |      |            |         |         |               |             |                     | 2                  | 2   |      |        |         |         |         |      |    |           |                        |                      |       |
|             |          |       |                   |        |     |          |             |                                                      |                                     |        |       |      |            |         |         |               |             |                     |                    |     | 192  | 201    | 579.32  | 1156.63 | 1156.56 | 0.07 | 0  | 40        | 0.0085259              | K.YGIQMPAFSK.I       | 26.83 |
|             |          |       |                   |        |     |          |             |                                                      |                                     |        |       |      |            |         |         |               |             |                     |                    |     | 557  | 567    | 577.39  | 1152.77 | 1152.69 | 0.08 | 0  | 44        | 0.0023205              | K.TLQALQIPAAK.L      | 28.04 |
|             |          |       |                   |        |     |          |             |                                                      |                                     |        |       |      |            |         |         |               |             |                     |                    |     | 1466 | 1475   | 536.82  | 1071.63 | 1071.58 | 0.05 | 0  | 37        | 0.0190157              | K.LTELGTVDPK.N       | 25.66 |
|             |          |       |                   |        |     |          |             |                                                      |                                     |        |       |      |            |         |         |               |             |                     |                    |     | 1506 | 1516   | 618.95  | 1235.89 | 1235.65 | 0.23 | 0  | 41        | 0.0050676              | K.LQQTYAALNSK.A      | 23.7  |
| Q9Y490      | 1%       | 134   | 3                 | 271766 | 5.8 | Q9Y490   | TLN1_HUMAN  | Talin-1                                              | OS=Homo sapiens GN=TLN1 PE=1 SV=3   |        |       |      |            |         |         |               |             |                     | 2                  | 2   |      |        |         |         |         |      |    |           |                        |                      |       |
|             |          |       |                   |        |     |          |             |                                                      |                                     |        |       |      |            |         |         |               |             |                     |                    |     | 899  | 910    | 610.35  | 1218.69 | 1218.6  | 0.09 | 0  | 49        | 0.0008725              | R.MATNAAAQNAIK.K     | 17.89 |
|             |          |       |                   |        |     |          |             |                                                      |                                     |        |       |      |            |         |         |               |             |                     |                    |     | 1321 | 1332   | 599.35  | 1196.69 | 1196.64 | 0.05 | 0  | 32        | 0.0381416              | K.ALSTDAAPNLK.S      | 25.4  |
|             |          |       |                   |        |     |          |             |                                                      |                                     |        |       |      |            |         |         |               |             |                     |                    |     | 2032 | 2043   | 622.37  | 1242.73 | 1242.66 | 0.08 | 0  | 53        | 0.0003849              | K.VLVQNAAGSQEK.L     | 18.2  |
| P15144      | 23%      | 1313  | 20 (23)           | 109870 | 5.3 | P15144   | AMPN_HUMAN  | Aminopeptidase N                                     | OS=Homo sapiens GN=ANPEP PE=1 SV=4  |        |       |      |            |         |         |               |             | 3                   | 3                  |     |      |        |         |         |         |      |    |           |                        |                      |       |
|             |          |       |                   |        |     |          |             |                                                      |                                     |        |       |      |            |         |         |               |             |                     |                    | 2   | 9    | 457.29 | 912.56  | 912.51  | 0.05    | 1    | 33 | 0.0412821 | M.AKGFYISK.S           | 20.34                |       |
|             |          |       |                   |        |     |          |             |                                                      |                                     |        |       |      |            |         |         |               |             |                     |                    | 141 | 152  | 585.36 | 1168.7  | 1168.57 | 0.13    | 0    | 41 | 0.0056576 | R.GVGGSQPPDIDK.T       | 19.34                |       |
|             |          |       |                   |        |     |          |             |                                                      |                                     |        |       |      |            |         |         |               |             |                     |                    | 196 | 204  | 542.8  | 1083.58 | 1083.47 | 0.12    | 0    | 36 | 0.0165432 | R.SEYMEGNVR.K          | 19.95                |       |
|             |          |       |                   |        |     |          |             |                                                      |                                     |        |       |      |            |         |         |               |             |                     |                    | 196 | 204  | 550.78 | 1099.55 | 1099.46 | 0.09    | 0    | 49 | 0.001099  | R.SEYMEGNVR.K          | 17.86                |       |
|             |          |       |                   |        |     |          |             |                                                      |                                     |        |       |      |            |         |         |               |             |                     |                    | 205 | 218  | 497.31 | 1488.91 | 1488.77 | 0.14    | 1    | 56 | 0.0001724 | R.KVVATTQMQAADAR.K     | 18.21                |       |
|             |          |       |                   |        |     |          |             |                                                      |                                     |        |       |      |            |         |         |               |             |                     |                    | 205 | 218  | 753.5  | 1504.99 | 1504.77 | 0.22    | 1    | 66 | 1.60E-05  | R.KVVATTQMQAADAR.K     | 17.3                 |       |
|             |          |       |                   |        |     |          |             |                                                      |                                     |        |       |      |            |         |         |               |             |                     |                    | 205 | 219  | 545.33 | 1632.97 | 1632.86 | 0.11    | 2    | 56 | 0.0001706 | R.KVVATTQMQAADARK.S    | 16.45                |       |
|             |          |       |                   |        |     |          |             |                                                      |                                     |        |       |      |            |         |         |               |             |                     |                    | 206 | 218  | 681.38 | 1360.76 | 1360.68 | 0.08    | 0    | 78 | 1.32E-06  | K.VVATTQMQAADAR.K      | 19.64                |       |
|             |          |       |                   |        |     |          |             |                                                      |                                     |        |       |      |            |         |         |               |             |                     |                    | 206 | 218  | 689.38 | 1376.75 | 1376.67 | 0.08    | 0    | 91 | 5.31E-08  | K.VVATTQMQAADAR.K      | 17.35                |       |
|             |          |       |                   |        |     |          |             |                                                      |                                     |        |       |      |            |         |         |               |             |                     |                    | 206 | 219  | 502.63 | 1504.87 | 1504.77 | 0.1     | 1    | 35 | 0.0207021 | K.VVATTQMQAADARK.S     | 16.76                |       |
|             |          |       |                   |        |     |          |             |                                                      |                                     |        |       |      |            |         |         |               |             |                     |                    | 220 | 230  | 672.83 | 1343.65 | 1343.55 | 0.1     | 0    | 35 | 0.0224664 | K.SFPCFDEPAMK.A        | 28.3                 |       |
|             |          |       |                   |        |     |          |             |                                                      |                                     |        |       |      |            |         |         |               |             |                     |                    | 242 | 252  | 609.89 | 1217.76 | 1217.63 | 0.13    | 0    | 56 | 0.0002199 | K.DLTALSNMLPK.G        | 29.34                |       |
|             |          |       |                   |        |     |          |             |                                                      |                                     |        |       |      |            |         |         |               |             |                     |                    | 293 | 301  | 479.33 | 956.64  | 956.54  | 0.1     | 0    | 71 | 6.23E-06  | K.QASNGVLIR.I          | 20.94                |       |
|             |          |       |                   |        |     |          |             |                                                      |                                     |        |       |      |            |         |         |               |             |                     |                    | 364 | 379  | 863    | 1723.98 | 1723.83 | 0.16    | 0    | 79 | 8.62E-07  | R.ENSLFDFPLSSSSSNK.E   | 30.86                |       |
|             |          |       |                   |        |     |          |             |                                                      |                                     |        |       |      |            |         |         |               |             |                     |                    | 364 | 381  | 670.72 | 2009.13 | 2008.97 | 0.16    | 1    | 39 | 0.0069173 | R.ENSLFDFPLSSSSSNK.E.V | 29.42                |       |
|             |          |       |                   |        |     |          |             |                                                      |                                     |        |       |      |            |         |         |               |             |                     |                    | 433 | 442  | 627.36 | 1252.71 | 1252.61 | 0.1     | 0    | 43 | 0.0036944 | K.DLMVLDVYR.V          | 29.77                |       |
|             |          |       |                   |        |     |          |             |                                                      |                                     |        |       |      |            |         |         |               |             |                     |                    | 486 | 497  | 709.92 | 1417.82 | 1417.68 | 0.14    | 0    | 68 | 1.02E-05  | R.MLSSFLSSEDFVK.Q      | 31.7                 |       |
|             |          |       |                   |        |     |          |             |                                                      |                                     |        |       |      |            |         |         |               |             |                     |                    | 596 | 606  | 732.42 | 1462.83 | 1462.72 | 0.11    | 0    | 33 | 0.0339383 | R.QQQDYWLIDVR.A        | 31.34                |       |
|             |          |       |                   |        |     |          |             |                                                      |                                     |        |       |      |            |         |         |               |             |                     |                    | 632 | 640  | 612.84 | 1223.66 | 1223.52 | 0.14    | 0    | 47 | 0.0012505 | R.VNYDEENWR.K          | 26.51                |       |
|             |          |       |                   |        |     |          |             |                                                      |                                     |        |       |      |            |         |         |               |             |                     |                    | 642 | 648  | 443.79 | 885.56  | 885.5   | 0.06    | 0    | 44 | 0.0031065 | K.IQTQLQR.D            | 18.39                |       |
|             |          |       |                   |        |     |          |             |                                                      |                                     |        |       |      |            |         |         |               |             |                     |                    | 649 | 658  | 374.56 | 1120.67 | 1120.6  | 0.07    | 0    | 38 | 0.0117192 | R.DHSAIPVNR.A          | 25.68                |       |
|             |          |       |                   |        |     |          |             |                                                      |                                     |        |       |      |            |         |         |               |             |                     |                    | 659 | 673  | 538.31 | 1611.89 | 1611.84 | 0.06    | 0    | 76 | 1.59E-06  | R.AQIINDAFNLASAHK.V    | 28.95                |       |
|             |          |       |                   |        |     |          |             |                                                      |                                     |        |       |      |            |         |         |               |             |                     |                    | 778 | 793  | 664.03 | 1989.07 | 1988.93 | 0.14    | 0    | 32 | 0.0316756 | K.QWMENPNNNPIHPNLR.S   | 26.38                |       |
|             |          |       |                   |        |     |          |             |                                                      |                                     |        |       |      |            |         |         |               |             |                     |                    | 837 | 843  | 472.31 | 942.61  | 942.53  | 0.08    | 0    | 46 | 0.0018483 | K.ELWILNR.Y            | 31.12                |       |
|             |          |       |                   |        |     |          |             |                                                      |                                     |        |       |      |            |         |         |               |             |                     |                    | 844 | 855  | 734.45 | 1466.89 | 1466.78 | 0.11    | 0    | 82 | 3.69E-07  | R.YLSYTLNPDLIR.K       | 30.51                |       |
|             |          |       |                   |        |     |          |             |                                                      |                                     |        |       |      |            |         |         |               |             |                     |                    | 924 | 935  | 635.33 | 1268.65 | 1268.53 | 0.13    | 0    | 68 | 1.05E-05  | K.DNEETGFGSGTR.A       | 19.82                |       |
|             |          |       |                   |        |     |          |             |                                                      |                                     |        |       |      |            |         |         |               |             |                     |                    | 936 | 943  | 451.28 | 900.55  | 900.49  | 0.06    | 0    | 57 | 0.0002074 | R.ALEQALEK.T           | 21.5                 |       |

| accession # | coverage | score   | distinct peptides | mass   | pl  | start AA           | end AA                                                   | m/z obs                              | M obs   | M calc | delta | miss | pept score | exp val             | peptide       | modifications | retent time | Strongest gel slice | # gel slices found |  |
|-------------|----------|---------|-------------------|--------|-----|--------------------|----------------------------------------------------------|--------------------------------------|---------|--------|-------|------|------------|---------------------|---------------|---------------|-------------|---------------------|--------------------|--|
| Q92896      | 3%       | 193     | 4                 | 138382 | 6.5 | Q92896 GSLG1_HUMAN | Golgi apparatus protein 1                                | OS=Homo sapiens GN=GLG1 PE=1 SV=1    |         |        |       |      |            |                     |               |               |             |                     |                    |  |
|             |          |         |                   |        |     | 223 232            | 616.83                                                   | 1231.64                              | 1231.59 | 0.05   | 0     | 58   | 0.0001235  | K.MTAIFSDYR.L       | Oxidation (M) | 29.21         | 3           | 1                   |                    |  |
|             |          |         |                   |        |     | 361 367            | 425.77                                                   | 849.53                               | 849.46  | 0.07   | 0     | 37   | 0.0172046  | K.LIAQDYK.V         |               | 19.9          |             |                     |                    |  |
|             |          |         |                   |        |     | 925 933            | 569.82                                                   | 1137.63                              | 1137.54 | 0.09   | 0     | 40   | 0.0059051  | R.QITQNTDYR.L       |               | 18.43         |             |                     |                    |  |
|             |          |         |                   |        |     | 980 989            | 611.81                                                   | 1221.61                              | 1221.53 | 0.08   | 0     | 58   | 0.0001208  | R.LSSDCEDQIR.I      |               | 19.25         |             |                     |                    |  |
| P20702      | 1%       | 67      | 2                 | 128946 | 6.2 | P20702 ITAX_HUMAN  | Integrin alpha-X                                         | OS=Homo sapiens GN=ITGAX PE=1 SV=3   |         |        |       |      |            |                     |               |               |             |                     |                    |  |
|             |          |         |                   |        |     | 608 614            | 399.81                                                   | 797.61                               | 797.51  | 0.1    | 0     | 33   | 0.0184879  | R.GQVLLLR.T         |               | 27.95         | 3           | 1                   |                    |  |
|             |          |         |                   |        |     | 1091 1099          | 495.8                                                    | 989.59                               | 989.54  | 0.05   | 0     | 34   | 0.0362646  | R.AQTTTLEK.Y        |               | 18.73         |             |                     |                    |  |
| P16284      | 7%       | 288     | 5                 | 83396  | 6.5 | P16284 PECA1_HUMAN | Platelet endothelial cell adhesion molecule              | OS=Homo sapiens GN=PECAM1 PE=1 SV=1  |         |        |       |      |            |                     |               |               |             |                     |                    |  |
|             |          |         |                   |        |     | 90 100             | 664.41                                                   | 1326.81                              | 1326.65 | 0.17   | 0     | 55   | 0.0002465  | K.STESYFIPEVR.I     |               | 30.03         | 4           | 3                   |                    |  |
|             |          |         |                   |        |     | 141 149            | 471.8                                                    | 941.59                               | 941.53  | 0.06   | 0     | 57   | 0.000139   | K.EAIQGGIVR.V       |               | 22.75         |             |                     |                    |  |
|             |          |         |                   |        |     | 362 374            | 756.43                                                   | 1510.85                              | 1510.72 | 0.14   | 0     | 59   | 7.75E-05   | K.EDTIVSQTQDFTK.I   |               | 28.16         |             |                     |                    |  |
|             |          |         |                   |        |     | 457 465            | 496.28                                                   | 990.55                               | 990.48  | 0.07   | 0     | 48   | 0.001076   | K.NSNDPVAFK.D       |               | 22.36         |             |                     |                    |  |
|             |          |         |                   |        |     | 565 577            | 833.7                                                    | 1665.39                              | 1665.67 | -0.29  | 0     | 69   | 2.60E-06   | K.EQEGEYYCTAFNR.A   |               | 28.25         |             |                     |                    |  |
| P11279      | 7%       | 168     | 3                 | 45367  | 9   | P11279 LAMP1_HUMAN | Lysosome-associated membrane glycoprotein 1              | OS=Homo sapiens GN=LAMP1 PE=1 SV=3   |         |        |       |      |            |                     |               |               |             |                     |                    |  |
|             |          |         |                   |        |     | 138 146            | 517.32                                                   | 1032.63                              | 1032.55 | 0.09   | 0     | 71   | 7.27E-06   | K.TVESITDIR.A       |               | 27.46         | 4           | 11                  |                    |  |
|             |          |         |                   |        |     | 327 337            | 576.35                                                   | 1150.69                              | 1150.6  | 0.09   | 0     | 58   | 0.0001135  | R.ALQATVGNSSYK.C    |               | 21.45         |             |                     |                    |  |
|             |          |         |                   |        |     | 410 417            | 438.74                                                   | 875.47                               | 875.41  | 0.06   | 0     | 39   | 0.0103284  | R.SHAGYQTL-         |               | 20.67         |             |                     |                    |  |
| P13473      | 6%       | 149     | 3                 | 45503  | 5.3 | P13473 LAMP2_HUMAN | Lysosome-associated membrane glycoprotein 2              | OS=Homo sapiens GN=LAMP2 PE=1 SV=2   |         |        |       |      |            |                     |               |               |             |                     |                    |  |
|             |          |         |                   |        |     | 145 152            | 494.3                                                    | 986.59                               | 986.55  | 0.03   | 0     | 47   | 0.0017389  | R.IPLNDLFR.C        |               | 31.38         | 4           | 5                   |                    |  |
|             |          |         |                   |        |     | 153 161            | 526.29                                                   | 1050.57                              | 1050.5  | 0.07   | 0     | 65   | 1.88E-05   | R.CNSLSTLEK.N       |               | 23.09         |             |                     |                    |  |
|             |          |         |                   |        |     | 267 273            | 399.27                                                   | 796.53                               | 796.46  | 0.08   | 0     | 36   | 0.013156   | R.SHTALLR.L         |               | 18.24         |             |                     |                    |  |
| P05556      | 4%       | 131     | 3                 | 91714  | 5.3 | P05556 ITB1_HUMAN  | Integrin beta-1                                          | OS=Homo sapiens GN=ITGB1 PE=1 SV=1   |         |        |       |      |            |                     |               |               |             |                     |                    |  |
|             |          |         |                   |        |     | 191 202            | 662.9                                                    | 1323.78                              | 1323.67 | 0.1    | 0     | 51   | 0.0004829  | K.TVMPYISTTPAK.L    | Oxidation (M) | 26.15         | 4           | 2                   |                    |  |
|             |          |         |                   |        |     | 229 238            | 546.34                                                   | 1090.67                              | 1090.57 | 0.1    | 0     | 33   | 0.0419229  | K.GEVFNELVKG.Q      |               | 29.38         |             |                     |                    |  |
|             |          |         |                   |        |     | 785 794            | 508.34                                                   | 1014.66                              | 1014.57 | 0.09   | 0     | 48   | 0.0014102  | K.SAVTTVVNPK.Y      |               | 20.41         |             |                     |                    |  |
| P42704      | 3%       | 202     | 4                 | 159003 | 5.8 | P42704 LPPRC_HUMAN | Leucine-rich PPR motif-containing protein, mitochondrial | OS=Homo sapiens GN=LPPRC PE=1 SV=3   |         |        |       |      |            |                     |               |               |             |                     |                    |  |
|             |          |         |                   |        |     | 171 178            | 528.86                                                   | 1055.7                               | 1055.53 | 0.17   | 0     | 34   | 0.0331924  | K.VYVLQNEYK.F       |               | 24.93         | 4           | 1                   |                    |  |
|             |          |         |                   |        |     | 188 197            | 609.35                                                   | 1216.68                              | 1216.55 | 0.13   | 0     | 50   | 0.0007906  | K.MEEANIQPNR.V      | Oxidation (M) | 18.59         |             |                     |                    |  |
|             |          |         |                   |        |     | 930 941            | 702.92                                                   | 1403.82                              | 1403.67 | 0.15   | 0     | 56   | 0.0001677  | R.CVANNQVETLEK.L    |               | 23.88         |             |                     |                    |  |
|             |          |         |                   |        |     | 1129 1139          | 636.86                                                   | 1271.71                              | 1271.65 | 0.07   | 0     | 63   | 4.03E-05   | K.TVLDQQQTSPSR.L    |               | 19.76         |             |                     |                    |  |
| Q92542      | 3%       | 68      | 2                 | 79103  | 5.7 | Q92542 NICA_HUMAN  | Nicastrin                                                | OS=Homo sapiens GN=NCSTN PE=1 SV=2   |         |        |       |      |            |                     |               |               |             |                     |                    |  |
|             |          |         |                   |        |     | 315 323            | 485.32                                                   | 968.62                               | 968.53  | 0.09   | 0     | 34   | 0.0259538  | K.APDVTTLPR.N       |               | 26.24         | 4           | 3                   |                    |  |
|             |          |         |                   |        |     | 404 414            | 520.37                                                   | 1038.72                              | 1038.62 | 0.1    | 0     | 34   | 0.0265156  | K.SGAGVPAVILR.R     |               | 28.59         |             |                     |                    |  |
| P06756      | 3%       | 142     | 3                 | 117048 | 5.5 | P06756 ITAV_HUMAN  | Integrin alpha-V                                         | OS=Homo sapiens GN=ITGAV PE=1 SV=2   |         |        |       |      |            |                     |               |               |             |                     |                    |  |
|             |          |         |                   |        |     | 234 241            | 490.31                                                   | 978.6                                | 978.49  | 0.11   | 0     | 53   | 0.0003875  | K.YNNQLATR.T        |               | 18.72         | 4           | 1                   |                    |  |
|             |          |         |                   |        |     | 708 718            | 638.86                                                   | 1275.71                              | 1275.6  | 0.12   | 0     | 59   | 9.94E-05   | R.QVVCDDLGNPMK.A    | Oxidation (M) | 22.88         |             |                     |                    |  |
|             |          |         |                   |        |     | 814 822            | 469.24                                                   | 936.46                               | 936.43  | 0.03   | 0     | 32   | 0.043469   | R.NNGPSSFSK.A       |               | 18.28         |             |                     |                    |  |
| P14625      | 13%      | 545     | 10                | 92696  | 4.8 | P14625 ENPL_HUMAN  | Endoplasmin                                              | OS=Homo sapiens GN=HSP90B1 PE=1 SV=1 |         |        |       |      |            |                     |               |               |             |                     |                    |  |
|             |          |         |                   |        |     | 103 114            | 638.37                                                   | 1274.73                              | 1274.64 | 0.09   | 0     | 81   | 5.15E-07   | R.ELISNASDALDK.I    |               | 27.74         | 5           | 3                   |                    |  |
|             |          |         |                   |        |     | 169 177            | 491.77                                                   | 981.52                               | 981.48  | 0.05   | 0     | 73   | 2.94E-06   | K.SGTSEFLNK.M       |               | 23.7          |             |                     |                    |  |
|             |          |         |                   |        |     | 435 448            | 743.49                                                   | 1484.97                              | 1484.75 | 0.22   | 0     | 86   | 1.75E-07   | K.GVVDSDDLPLNVSR.E  |               | 29.26         |             |                     |                    |  |
|             |          |         |                   |        |     | 494 503            | 380.56                                                   | 1138.66                              | 1138.57 | 0.09   | 0     | 33   | 0.0310617  | K.LGVIEDHSNR.T      |               | 19.57         |             |                     |                    |  |
|             |          |         |                   |        |     | 538 546            | 524.29                                                   | 1046.56                              | 1046.49 | 0.08   | 0     | 36   | 0.0194808  | K.IYFMAGSSR.K       | Oxidation (M) | 26.61         |             |                     |                    |  |
|             |          |         |                   |        |     | 548 557            | 575.83                                                   | 1149.64                              | 1149.53 | 0.11   | 0     | 50   | 0.0007305  | K.EAESSPFVER.L      |               | 25.64         |             |                     |                    |  |
|             |          |         |                   |        |     | 672 682            | 645.33                                                   | 1288.64                              | 1288.59 | 0.05   | 0     | 61   | 5.68E-05   | K.DISTNYYASQK.K     |               | 26.22         |             |                     |                    |  |
|             |          |         |                   |        |     | 684 690            | 438.78                                                   | 875.55                               | 875.45  | 0.1    | 0     | 47   | 0.00193    | K.TFEINPR.H         |               | 26.91         |             |                     |                    |  |
|             |          |         |                   |        |     | 725 733            | 497.3                                                    | 992.58                               | 992.52  | 0.06   | 0     | 47   | 0.0014071  | R.SGYLLPDTK.A       |               | 27.82         |             |                     |                    |  |
| 745 754     | 543.34   | 1084.67 | 1084.58           | 0.1    | 0   | 34                 | 0.0310511                                                | R.LSLNIDPDAK.V                       |         | 28.95  |       |      |            |                     |               |               |             |                     |                    |  |
| P05362      | 6%       | 107     | 2                 | 58587  | 8.3 | P05362 ICAM1_HUMAN | Intercellular adhesion molecule 1                        | OS=Homo sapiens GN=ICAM1 PE=1 SV=2   |         |        |       |      |            |                     |               |               |             |                     |                    |  |
|             |          |         |                   |        |     | 41 56              | 848.45                                                   | 1694.89                              | 1694.76 | 0.13   | 0     | 45   | 0.0018112  | R.GGSLVLTCTSDCQPK.L |               | 23.21         | 5           | 2                   |                    |  |



| accession # | coverage | score  | distinct peptides | mass    | pl   | start AA | end AA | m/z obs | M obs   | M calc  | delta | miss | pept score | exp val   | peptide             | modifications   | retent time | Strongest gel slice | # gel slices found |           |                     |  |       |   |   |
|-------------|----------|--------|-------------------|---------|------|----------|--------|---------|---------|---------|-------|------|------------|-----------|---------------------|-----------------|-------------|---------------------|--------------------|-----------|---------------------|--|-------|---|---|
| P12814      | 5%       | 184    | 4                 | 103563  | 5.3  | 274      | 287    | 725.42  | 1448.83 | 1448.67 | 0.16  | 0    | 62         | 4.81E-05  | K.ASVSVTAEDGTR.L    |                 | 19.92       |                     |                    |           |                     |  |       |   |   |
|             |          |        |                   |         |      | 134      | 147    | 769.48  | 1536.95 | 1536.77 | 0.19  | 0    | 35         | 0.0188891 | R.FAIQDISVEETSAK.E  |                 | 29.78       | 5                   | 1                  |           |                     |  |       |   |   |
|             |          |        |                   |         |      | 727      | 738    | 715.44  | 1428.86 | 1428.76 | 0.1   | 0    | 58         | 0.0001062 | R.TINEVENQLTR.D     |                 | 29.22       |                     |                    |           |                     |  |       |   |   |
|             |          |        |                   |         |      | 742      | 752    | 677.83  | 1353.65 | 1353.6  | 0.05  | 0    | 56         | 0.0001654 | K.GISQEQMNEFR.A     | Oxidation (M)   | 22.57       |                     |                    |           |                     |  |       |   |   |
|             |          |        |                   |         |      | 795      | 803    | 530.83  | 1059.65 | 1059.54 | 0.11  | 0    | 36         | 0.0232168 | R.IMSIVDPNR.L       | Oxidation (M)   | 24.93       |                     |                    |           |                     |  |       |   |   |
| Q13740      | 5%       | 123    | 2                 | 65745   | 5.9  | 294      | 304    | 628.88  | 1255.75 | 1255.6  | 0.14  | 0    | 53         | 0.0004017 | R.SSNYTLTDVLR.R     |                 | 27.48       | 5                   | 2                  |           |                     |  |       |   |   |
|             |          |        |                   |         |      | 345      | 360    | 838.03  | 1674.04 | 1673.84 | 0.2   | 0    | 40         | 0.0058689 | R.QIGDALPVSTISASR.N |                 | 29          |                     |                    |           |                     |  |       |   |   |
|             |          |        |                   |         |      |          |        |         |         |         |       |      |            |           |                     |                 |             |                     |                    |           |                     |  |       |   |   |
| O43707      | 4%       | 177    | 3                 | 105245  | 5.3  | 153      | 166    | 769.48  | 1536.95 | 1536.77 | 0.19  | 0    | 35         | 0.0188891 | R.FAIQDISVEETSAK.E  |                 | 29.78       | 5                   | 1                  |           |                     |  |       |   |   |
|             |          |        |                   |         |      | 746      | 757    | 715.44  | 1428.86 | 1428.76 | 0.1   | 0    | 58         | 0.0001062 | R.TINEVENQLTR.D     |                 | 29.22       |                     |                    |           |                     |  |       |   |   |
|             |          |        |                   |         |      | 761      | 771    | 684.93  | 1367.85 | 1367.61 | 0.23  | 0    | 55         | 0.0002186 | K.GISQEQMNEFR.A     | Oxidation (M)   | 22.35       |                     |                    |           |                     |  |       |   |   |
|             |          |        |                   |         |      |          |        |         |         |         |       |      |            |           |                     |                 |             |                     |                    |           |                     |  |       |   |   |
| Q8WUM4      | 2%       | 74     | 2                 | 96590   | 6.1  | 291      | 298    | 515.32  | 1028.63 | 1028.48 | 0.15  | 0    | 38         | 0.0139643 | R.YDEVVNVK.D        |                 | 25.38       | 5                   | 1                  |           |                     |  |       |   |   |
|             |          |        |                   |         |      | 542      | 553    | 660.91  | 1319.81 | 1319.68 | 0.13  | 0    | 38         | 0.0123544 | R.TMQGSEVNVNLIK.S   | Oxidation (M)   | 27.78       |                     |                    |           |                     |  |       |   |   |
|             |          |        |                   |         |      |          |        |         |         |         |       |      |            |           |                     |                 |             |                     |                    |           |                     |  |       |   |   |
| Q14697      | 2%       | 133    | 3                 | 107263  | 5.7  | 158      | 164    | 437.27  | 872.53  | 872.46  | 0.07  | 0    | 38         | 0.017044  | R.DLLLEDR.S         |                 | 29.13       | 5                   | 1                  |           |                     |  |       |   |   |
|             |          |        |                   |         |      | 806      | 812    | 350.24  | 698.47  | 698.41  | 0.07  | 0    | 31         | 0.0484943 | R.GGTIVPR.W         |                 | 19.44       |                     |                    |           |                     |  |       |   |   |
|             |          |        |                   |         |      | 858      | 863    | 403.28  | 804.54  | 804.45  | 0.09  | 0    | 33         | 0.0409869 | R.QEFLLR.R          |                 | 28.78       |                     |                    |           |                     |  |       |   |   |
|             |          |        |                   |         |      |          |        |         |         |         |       |      |            |           |                     |                 |             |                     |                    |           |                     |  |       |   |   |
| P08238      | 22%      | 844    | 14                | 83554   | 5    | 42       | 53     | 638.38  | 1274.74 | 1274.64 | 0.11  | 0    | 65         | 2.22E-05  | R.ELISNASDALDK.I    |                 | 27.72       | 6                   | 4                  |           |                     |  |       |   |   |
|             |          |        |                   |         |      | 56       | 69     | 513.97  | 1538.88 | 1538.75 | 0.13  | 1    | 67         | 1.39E-05  | R.YESLTDPSKLDGK.E   |                 | 26.58       |                     |                    |           |                     |  |       |   |   |
|             |          |        |                   |         |      | 73       | 82     | 597.88  | 1193.74 | 1193.64 | 0.1   | 0    | 43         | 0.0035975 | K.IDIIPNPQER.T      |                 | 28.72       |                     |                    |           |                     |  |       |   |   |
|             |          |        |                   |         |      | 83       | 95     | 683.42  | 1364.82 | 1364.72 | 0.1   | 0    | 70         | 6.37E-06  | R.TLTLVDTGIGMTK.A   | Oxidation (M)   | 28.98       |                     |                    |           |                     |  |       |   |   |
|             |          |        |                   |         |      | 96       | 107    | 621.92  | 1241.82 | 1241.7  | 0.13  | 0    | 83         | 3.44E-07  | K.ADLINNLGTIAK.S    |                 | 29.98       |                     |                    |           |                     |  |       |   |   |
|             |          |        |                   |         |      | 276      | 284    | 576.31  | 1150.61 | 1150.55 | 0.06  | 0    | 54         | 0.0003076 | K.YIDQELNLT         |                 | 22.22       |                     |                    |           |                     |  |       |   |   |
|             |          |        |                   |         |      | 292      | 306    | 924.49  | 1846.96 | 1846.79 | 0.17  | 0    | 66         | 1.69E-05  | R.NPDDITNEEYGEFYK.S |                 | 29.63       |                     |                    |           |                     |  |       |   |   |
|             |          |        |                   |         |      | 331      | 337    | 415.3   | 828.58  | 828.52  | 0.06  | 0    | 38         | 0.0150757 | R.ALFLFIPR.R        |                 | 31.15       |                     |                    |           |                     |  |       |   |   |
|             |          |        |                   |         |      | 339      | 347    | 540.84  | 1079.66 | 1079.53 | 0.13  | 0    | 39         | 0.0087721 | R.APFDFENK.K        |                 | 31.54       |                     |                    |           |                     |  |       |   |   |
|             |          |        |                   |         |      | 379      | 392    | 757.47  | 1512.92 | 1512.78 | 0.14  | 0    | 100        | 6.99E-09  | R.GVVDSEDLPLNISR.E  |                 | 30.11       |                     |                    |           |                     |  |       |   |   |
|             |          |        |                   |         |      | 439      | 448    | 381.21  | 1140.61 | 1140.55 | 0.06  | 0    | 49         | 0.0008973 | K.LGIHEDSTNR.R      |                 | 18.41       |                     |                    |           |                     |  |       |   |   |
|             |          |        |                   |         |      | 482      | 491    | 580.85  | 1159.69 | 1159.58 | 0.11  | 0    | 58         | 0.0001409 | K.SIYYITGESK.E      |                 | 28.02       |                     |                    |           |                     |  |       |   |   |
|             |          |        |                   |         |      | 492      | 502    | 625.36  | 1248.71 | 1248.61 | 0.1   | 0    | 66         | 1.88E-05  | K.EQVANSFAFVER.V    |                 | 25.37       |                     |                    |           |                     |  |       |   |   |
|             |          |        |                   |         |      | 613      | 623    | 648.79  | 1295.57 | 1295.48 | 0.09  | 0    | 49         | 0.0008653 | R.DNSTMGYMAAK.K     | 3 Oxidation (M) | 17.98       |                     |                    |           |                     |  |       |   |   |
|             |          |        |                   |         |      | P07900   | 17%    | 730     | 12      | 85006   | 4.9   | 47   | 58         | 646.37    | 1290.72             | 1290.63         | 0.09        | 0                   | 71                 | 6.07E-06  | R.ELISNSSDALDK.I    |  | 26.76 | 6 | 2 |
| 47          | 60       | 521    | 1559.98           | 1559.82 | 0.16 |          |        |         |         |         |       | 1    | 34         | 0.027932  | R.ELISNSSDALDKIR.Y  |                 | 28.11       |                     |                    |           |                     |  |       |   |   |
| 61          | 74       | 513.97 | 1538.88           | 1538.75 | 0.13 |          |        |         |         |         |       | 1    | 67         | 1.39E-05  | R.YESLTDPSKLDGK.E   |                 | 26.58       |                     |                    |           |                     |  |       |   |   |
| 88          | 100      | 683.42 | 1364.82           | 1364.72 | 0.1  |          |        |         |         |         |       | 0    | 70         | 6.37E-06  | R.TLTLVDTGIGMTK.A   | Oxidation (M)   | 28.98       |                     |                    |           |                     |  |       |   |   |
| 101         | 112      | 621.92 | 1241.82           | 1241.7  | 0.13 |          |        |         |         |         |       | 0    | 83         | 3.44E-07  | K.ADLINNLGTIAK.S    |                 | 29.98       |                     |                    |           |                     |  |       |   |   |
| 284         | 292      | 576.31 | 1150.61           | 1150.55 | 0.06 |          |        |         |         |         |       | 0    | 54         | 0.0003076 | K.YIDQELNLT         |                 | 22.22       |                     |                    |           |                     |  |       |   |   |
| 300         | 314      | 917.54 | 1833.07           | 1832.77 | 0.3  |          |        |         |         |         |       | 0    | 49         | 0.0007844 | R.NPDDITNEEYGEFYK.S |                 | 29.55       |                     |                    |           |                     |  |       |   |   |
| 347         | 355      | 554.84 | 1107.67           | 1107.53 | 0.14 |          |        |         |         |         |       | 0    | 52         | 0.000415  | R.APFDFENR.K        |                 | 31.8        |                     |                    |           |                     |  |       |   |   |
| 387         | 400      | 757.47 | 1512.92           | 1512.78 | 0.14 |          |        |         |         |         |       | 0    | 100        | 6.99E-09  | R.GVVDSEDLPLNISR.E  |                 | 30.11       |                     |                    |           |                     |  |       |   |   |
| 437         | 443      | 474.78 | 947.55            | 947.44  | 0.11 |          |        |         |         |         |       | 0    | 36         | 0.0206323 | K.FYEQFSK.N         |                 | 27.02       |                     |                    |           |                     |  |       |   |   |
| 490         | 499      | 612.88 | 1223.74           | 1223.62 | 0.12 |          |        |         |         |         |       | 0    | 35         | 0.0191025 | K.HIYYITGETK.D      |                 | 25.41       |                     |                    |           |                     |  |       |   |   |
| 500         | 510      | 618.36 | 1234.71           | 1234.59 | 0.12 |          |        |         |         |         |       | 0    | 80         | 7.98E-07  | K.DQVANSFAFVER.L    |                 | 26.45       |                     |                    |           |                     |  |       |   |   |
| P05107      | 11%      | 355    | 8                 | 87976   | 6.7  |          |        |         |         |         |       | 156  | 165        | 545.32    | 1088.63             | 1088.55         | 0.08        | 0                   | 44                 | 0.0033075 | R.ALNEITESGR.I      |  | 22.18 | 6 | 3 |
|             |          |        |                   |         |      |          |        |         |         |         |       | 275  | 285        | 563.86    | 1125.7              | 1125.61         | 0.09        | 0                   | 48                 | 0.0011017 | K.LGAILTPNDGR.C     |  | 27.58 |   |   |
|             |          |        |                   |         |      |          |        |         |         |         |       | 311  | 325        | 837.01    | 1672                | 1671.89         | 0.11        | 0                   | 58                 | 9.47E-05  | K.LAENNIQPIFAVTSR.M |  | 30.81 |   |   |
|             |          |        |                   |         |      | 489      | 498    | 576.81  | 1151.6  | 1151.49 | 0.12  | 0    | 39         | 0.0082076 | R.SSQELEGSCR.K      |                 | 18.07       |                     |                    |           |                     |  |       |   |   |
|             |          |        |                   |         |      | 544      | 554    | 582.82  | 1163.63 | 1163.51 | 0.12  | 0    | 51         | 0.0006117 | R.YNGQVCGGPR.G      |                 | 18.45       |                     |                    |           |                     |  |       |   |   |
|             |          |        |                   |         |      | 578      | 586    | 524.32  | 1046.63 | 1046.48 | 0.14  | 0    | 47         | 0.0015122 | R.TTEGCLNPR.R       |                 | 18.67       |                     |                    |           |                     |  |       |   |   |
|             |          |        |                   |         |      | 625      | 633    | 572.3   | 1142.59 | 1142.51 | 0.08  | 0    | 33         | 0.0406917 | K.YISCAECLK.F       |                 | 24.81       |                     |                    |           |                     |  |       |   |   |
|             |          |        |                   |         |      |          |        |         |         |         |       |      |            |           |                     |                 |             |                     |                    |           |                     |  |       |   |   |



| accession # | coverage | score | distinct peptides | mass  | pl  | start AA | end AA      | m/z obs                                                                 | M obs           | M calc    | delta | miss | pept score | exp val   | peptide              | modifications   | retent time | Strongest gel slice | # gel slices found |   |
|-------------|----------|-------|-------------------|-------|-----|----------|-------------|-------------------------------------------------------------------------|-----------------|-----------|-------|------|------------|-----------|----------------------|-----------------|-------------|---------------------|--------------------|---|
|             |          |       |                   |       |     | 349      | 357         | 541.35                                                                  | 1080.68         | 1080.56   | 0.12  | 0    | 33         | 0.033459  | K.LLQDFNFK.E         |                 |             |                     | 31.41              |   |
|             |          |       |                   |       |     | 540      | 550         | 660.36                                                                  | 1318.71         | 1318.59   | 0.12  | 0    | 44         | 0.0032034 | K.NSLESYAFNMK.A      | Oxidation (M)   |             |                     | 28.78              |   |
| P38646      | 14%      | 436   | 8                 | 73920 | 5.9 | P38646   | GRP75_HUMAN | Stress-70 protein, mitochondrial                                        | OS=Homo sapiens | GN=HSPA9  | PE=1  | SV=2 |            |           |                      |                 |             |                     | 8                  | 1 |
|             |          |       |                   |       |     | 77       | 85          | 479.78                                                                  | 957.55          | 957.49    | 0.06  | 0    | 44         | 0.0033033 | K.VLENAEGAR.T        |                 |             |                     | 18.31              |   |
|             |          |       |                   |       |     | 108      | 121         | 784.95                                                                  | 1567.88         | 1567.76   | 0.11  | 0    | 71         | 4.87E-06  | R.QAVTNPNNTFYATK.R   |                 |             |                     | 26.65              |   |
|             |          |       |                   |       |     | 127      | 135         | 575.31                                                                  | 1148.6          | 1148.55   | 0.05  | 1    | 42         | 0.0042427 | R.RYDDPEVQK.D        |                 |             |                     | 18.27              |   |
|             |          |       |                   |       |     | 207      | 218         | 621.95                                                                  | 1241.89         | 1241.67   | 0.21  | 0    | 67         | 1.30E-05  | K.DAGQISGLNVLR.V     |                 |             |                     | 30.3               |   |
|             |          |       |                   |       |     | 219      | 234         | 823.48                                                                  | 1644.94         | 1644.87   | 0.07  | 0    | 43         | 0.0035962 | R.VINEPTAAALAYGLDK.S |                 |             |                     | 31.03              |   |
|             |          |       |                   |       |     | 349      | 360         | 681.41                                                                  | 1360.81         | 1360.74   | 0.08  | 0    | 41         | 0.0056221 | R.AQFEGIVDLIR.R      |                 |             |                     | 33.14              |   |
|             |          |       |                   |       |     | 395      | 405         | 645.91                                                                  | 1289.81         | 1289.67   | 0.14  | 0    | 41         | 0.0051809 | K.VQQTVDLFR.A        |                 |             |                     | 29.99              |   |
|             |          |       |                   |       |     | 635      | 646         | 616.4                                                                   | 1230.79         | 1230.66   | 0.13  | 0    | 87         | 1.52E-07  | R.QAASSLQQASLK.L     |                 |             |                     | 20.91              |   |
| P11021      | 12%      | 316   | 6                 | 72402 | 5.1 | P11021   | GRP78_HUMAN | 78 kDa glucose-regulated protein                                        | OS=Homo sapiens | GN=HSPA5  | PE=1  | SV=2 |            |           |                      |                 |             |                     | 8                  | 2 |
|             |          |       |                   |       |     | 50       | 60          | 614.86                                                                  | 1227.71         | 1227.62   | 0.09  | 0    | 64         | 3.18E-05  | R.VEIANDQGNI.I       |                 |             |                     | 21.65              |   |
|             |          |       |                   |       |     | 61       | 74          | 783.97                                                                  | 1565.93         | 1565.77   | 0.16  | 0    | 47         | 0.0013478 | R.ITPSYVAFTPGGER.L   |                 |             |                     | 29.78              |   |
|             |          |       |                   |       |     | 82       | 96          | 839.46                                                                  | 1676.9          | 1676.8    | 0.1   | 0    | 47         | 0.0014473 | K.NQLTSNPENTVFDAK.R  |                 |             |                     | 28.56              |   |
|             |          |       |                   |       |     | 186      | 197         | 617.35                                                                  | 1232.69         | 1232.62   | 0.07  | 0    | 55         | 0.0002581 | K.DAGTIAGLNVMI.I     | Oxidation (M)   |             |                     | 28.43              |   |
|             |          |       |                   |       |     | 198      | 213         | 830.52                                                                  | 1659.02         | 1658.89   | 0.13  | 0    | 54         | 0.0002652 | R.IINEPTAAAIYGLDK.R  |                 |             |                     | 31.12              |   |
|             |          |       |                   |       |     | 524      | 532         | 537.81                                                                  | 1073.6          | 1073.55   | 0.06  | 0    | 50         | 0.0007741 | K.ITITNDQNR.L        |                 |             |                     | 19.35              |   |
| P13667      | 5%       | 150   | 3                 | 73229 | 5   | P13667   | PDIA4_HUMAN | Protein disulfide-isomerase A4                                          | OS=Homo sapiens | GN=PDIA4  | PE=1  | SV=2 |            |           |                      |                 |             |                     | 8                  | 1 |
|             |          |       |                   |       |     | 235      | 245         | 567.32                                                                  | 1132.63         | 1132.56   | 0.07  | 0    | 47         | 0.0015139 | K.VDATAETDLAK.R      |                 |             |                     | 21.74              |   |
|             |          |       |                   |       |     | 350      | 362         | 729.92                                                                  | 1457.83         | 1457.75   | 0.08  | 0    | 53         | 0.00034   | K.VSQGQLVVMQPEK.F    | Oxidation (M)   |             |                     | 23.61              |   |
|             |          |       |                   |       |     | 534      | 543         | 584.81                                                                  | 1167.62         | 1167.55   | 0.07  | 0    | 49         | 0.0008407 | K.TFDSIVMDPK.K       | Oxidation (M)   |             |                     | 28.22              |   |
| P26038      | 5%       | 144   | 3                 | 67892 | 6.1 | P26038   | MOES_HUMAN  | Moesin                                                                  | OS=Homo sapiens | GN=MSN    | PE=1  | SV=3 |            |           |                      |                 |             |                     | 8                  | 2 |
|             |          |       |                   |       |     | 28       | 35          | 488.79                                                                  | 975.57          | 975.54    | 0.03  | 0    | 41         | 0.0062082 | K.QLFDQVVK.T         |                 |             |                     | 29.04              |   |
|             |          |       |                   |       |     | 361      | 370         | 616.39                                                                  | 1230.76         | 1230.58   | 0.18  | 0    | 44         | 0.002881  | K.AQQUELEEQTR.R      |                 |             |                     | 18.62              |   |
|             |          |       |                   |       |     | 449      | 458         | 603.81                                                                  | 1205.6          | 1205.56   | 0.04  | 0    | 58         | 0.0001066 | K.AGMVQEDLEK.T       | Oxidation (M)   |             |                     | 19.7               |   |
| P13796      | 3%       | 89    | 2                 | 70815 | 5.2 | P13796   | PLSL_HUMAN  | Plastin-2                                                               | OS=Homo sapiens | GN=LCP1   | PE=1  | SV=5 |            |           |                      |                 |             |                     | 8                  | 3 |
|             |          |       |                   |       |     | 133      | 141         | 545.27                                                                  | 1088.53         | 1088.46   | 0.07  | 0    | 45         | 0.0028347 | K.ALENDPDCR.H        |                 |             |                     | 18.44              |   |
|             |          |       |                   |       |     | 348      | 357         | 568.35                                                                  | 1134.69         | 1134.6    | 0.09  | 0    | 44         | 0.0029979 | R.QFVTATDVVR.G       |                 |             |                     | 28.09              |   |
| P49748      | 6%       | 172   | 4                 | 70745 | 8.9 | P49748   | ACADV_HUMAN | Very long-chain specific acyl-CoA dehydrogenase, mitochondrial          | OS=Homo sapiens | GN=ACADVL | PE=1  | SV=1 |            |           |                      |                 |             |                     | 9                  | 1 |
|             |          |       |                   |       |     | 265      | 276         | 578.85                                                                  | 1155.69         | 1155.61   | 0.08  | 0    | 54         | 0.0002757 | K.TPVTDPATGAVK.E     |                 |             |                     | 20.25              |   |
|             |          |       |                   |       |     | 342      | 353         | 614.82                                                                  | 1227.62         | 1227.57   | 0.05  | 0    | 45         | 0.002339  | R.FGMAAALAGTMR.G     | 2 Oxidation (M) |             |                     | 25.94              |   |
|             |          |       |                   |       |     | 460      | 469         | 589.34                                                                  | 1176.66         | 1176.61   | 0.05  | 0    | 35         | 0.0242872 | R.IFEGTDILR.L        |                 |             |                     | 29.72              |   |
|             |          |       |                   |       |     | 532      | 538         | 366.21                                                                  | 730.4           | 730.4     | 0.01  | 0    | 37         | 0.0204142 | R.SGELAVR.A          |                 |             |                     | 19.52              |   |
| P23786      | 5%       | 125   | 3                 | 74244 | 8.4 | P23786   | CPT2_HUMAN  | Carnitine O-palmitoyltransferase 2, mitochondrial                       | OS=Homo sapiens | GN=CPT2   | PE=1  | SV=2 |            |           |                      |                 |             |                     | 9                  | 1 |
|             |          |       |                   |       |     | 143      | 151         | 563.29                                                                  | 1124.56         | 1124.51   | 0.05  | 0    | 33         | 0.0307344 | K.SEYNDQLTR.A        |                 |             |                     | 20.73              |   |
|             |          |       |                   |       |     | 306      | 316         | 619.83                                                                  | 1237.64         | 1237.56   | 0.08  | 0    | 54         | 0.0002613 | K.LMSSGNEESLR.K      | Oxidation (M)   |             |                     | 19.35              |   |
|             |          |       |                   |       |     | 545      | 554         | 549.29                                                                  | 1096.56         | 1096.46   | 0.1   | 0    | 38         | 0.011611  | K.EAAMGQGFDR.H       | Oxidation (M)   |             |                     | 19.04              |   |
| P11117      | 4%       | 79    | 2                 | 48713 | 6.3 | P11117   | PPAL_HUMAN  | Lysosomal acid phosphatase                                              | OS=Homo sapiens | GN=ACP2   | PE=1  | SV=3 |            |           |                      |                 |             |                     | 9                  | 2 |
|             |          |       |                   |       |     | 154      | 161         | 472.32                                                                  | 942.62          | 942.47    | 0.14  | 0    | 32         | 0.0447516 | K.FPLGPCPR.Y         |                 |             |                     | 28.33              |   |
|             |          |       |                   |       |     | 255      | 265         | 584.43                                                                  | 1166.85         | 1166.71   | 0.14  | 0    | 47         | 0.0009598 | R.LQGGVLLAQIR.K      |                 |             |                     | 30.77              |   |
| Q15833      | 4%       | 120   | 2                 | 66853 | 6.1 | Q15833   | STXB2_HUMAN | Syntaxin-binding protein 2                                              | OS=Homo sapiens | GN=STXBP2 | PE=2  | SV=1 |            |           |                      |                 |             |                     | 9                  | 1 |
|             |          |       |                   |       |     | 214      | 225         | 600.81                                                                  | 1199.62         | 1199.57   | 0.05  | 0    | 71         | 5.64E-06  | K.ADTPSLGGPEK.T      |                 |             |                     | 21.73              |   |
|             |          |       |                   |       |     | 415      | 424         | 530.81                                                                  | 1059.61         | 1059.52   | 0.09  | 0    | 49         | 0.0012825 | R.NGVSEENLAK.L       |                 |             |                     | 19.65              |   |
| P04843      | 3%       | 86    | 2                 | 68641 | 6   | P04843   | JRPN1_HUMAN | Dolichyl-diphosphooligosaccharide-protein glycosyltransferase subunit 1 | OS=Homo sapiens | GN=RPN1   | PE=1  | SV=1 |            |           |                      |                 |             |                     | 9                  | 1 |
|             |          |       |                   |       |     | 117      | 126         | 490.81                                                                  | 979.61          | 979.57    | 0.04  | 0    | 38         | 0.0110959 | K.LPVALDPGAK.I       |                 |             |                     | 28.25              |   |
|             |          |       |                   |       |     | 194      | 204         | 656.33                                                                  | 1310.64         | 1310.61   | 0.03  | 0    | 48         | 0.000983  | R.SEDLLDYGFPR.D      |                 |             |                     | 32.73              |   |
| P31948      | 3%       | 70    | 2                 | 63227 | 6.4 | P31948   | STIP1_HUMAN | Stress-induced-phosphoprotein 1                                         | OS=Homo sapiens | GN=STIP1  | PE=1  | SV=1 |            |           |                      |                 |             |                     | 9                  | 1 |
|             |          |       |                   |       |     | 110      | 118         | 532.33                                                                  | 1062.64         | 1062.48   | 0.17  | 0    | 33         | 0.0396809 | K.EGLQNMEAR.L        | Oxidation (M)   |             |                     | 18.3               |   |
|             |          |       |                   |       |     | 145      | 153         | 533.32                                                                  | 1064.62         | 1064.55   | 0.07  | 0    | 38         | 0.010693  | R.TLLSDPTYR.E        |                 |             |                     | 28.16              |   |













| accession # | coverage | score | distinct peptides | mass  | pl  | start AA | end AA      | m/z obs                                                          | M obs           | M calc      | delta | miss | pept score | exp val | peptide | modifications | retent time | Strongest gel slice | # gel slices found |  |     |     |         |         |         |      |   |     |           |                       |       |    |   |
|-------------|----------|-------|-------------------|-------|-----|----------|-------------|------------------------------------------------------------------|-----------------|-------------|-------|------|------------|---------|---------|---------------|-------------|---------------------|--------------------|--|-----|-----|---------|---------|---------|------|---|-----|-----------|-----------------------|-------|----|---|
| P40926      | 18%      | 288   | 5                 | 35965 | 8.9 | P40926   | MDHM_HUMAN  | Malate dehydrogenase, mitochondrial                              | OS=Homo sapiens | GN=MDH2     | PE=1  | SV=2 |            |         |         |               |             |                     |                    |  |     |     |         |         |         |      |   |     |           |                       |       |    |   |
|             |          |       |                   |       |     |          |             |                                                                  |                 |             |       |      |            |         |         |               |             |                     |                    |  | 92  | 104 | 670     | 1337.98 | 1337.71 | 0.27 | 0 | 70  | 4.88E-06  | K.GGDVVVIPAGVPR.K     | 29.82 | 19 | 2 |
|             |          |       |                   |       |     |          |             |                                                                  |                 |             |       |      |            |         |         |               |             |                     |                    |  | 230 | 239 | 537.31  | 1072.6  | 1072.58 | 0.03 | 0 | 67  | 1.65E-05  | R.IQEAGTEVVK.A        | 19.53 |    |   |
|             |          |       |                   |       |     |          |             |                                                                  |                 |             |       |      |            |         |         |               |             |                     |                    |  | 242 | 257 | 736     | 1469.98 | 1469.69 | 0.29 | 0 | 73  | 3.08E-06  | K.AGAGSATLSMAYAGAR.F  | 26.58 |    |   |
|             |          |       |                   |       |     |          |             |                                                                  |                 |             |       |      |            |         |         |               |             |                     |                    |  | 258 | 269 | 672.4   | 1342.79 | 1342.66 | 0.13 | 0 | 42  | 0.0049224 | R.FVFLVDAMNGK.E       | 32.01 |    |   |
|             |          |       |                   |       |     |          |             |                                                                  |                 |             |       |      |            |         |         |               |             |                     |                    |  | 270 | 279 | 577.34  | 1152.67 | 1152.55 | 0.12 | 0 | 36  | 0.0178069 | K.EGVVECSFVK.S        | 28.09 |    |   |
| P62879      | 9%       | 157   | 3                 | 38048 | 5.6 | P62879   | GBB2_HUMAN  | Guanine nucleotide-binding protein G(I)/G(S)/G(T) subunit beta-2 | OS=Homo sapiens | GN=GNB2     | PE=1  | SV=3 |            |         |         |               |             |                     |                    |  |     |     |         |         |         |      |   |     |           |                       |       |    |   |
|             |          |       |                   |       |     |          |             |                                                                  |                 |             |       |      |            |         |         |               |             |                     |                    |  | 69  | 78  | 509.33  | 1016.65 | 1016.55 | 0.1  | 0 | 55  | 0.0002648 | R.LLVASQDGK.L         | 20.84 | 19 | 1 |
|             |          |       |                   |       |     |          |             |                                                                  |                 |             |       |      |            |         |         |               |             |                     |                    |  | 198 | 209 | 628.38  | 1254.75 | 1254.59 | 0.16 | 0 | 50  | 0.0007829 | R.TFVSGACDASIK.L      | 26.97 |    |   |
|             |          |       |                   |       |     |          |             |                                                                  |                 |             |       |      |            |         |         |               |             |                     |                    |  | 305 | 314 | 505.29  | 1008.57 | 1008.51 | 0.06 | 0 | 53  | 0.0003411 | R.AGVLAGHDNR.V        | 18.06 |    |   |
| P00338      | 8%       | 167   | 3                 | 36950 | 8.4 | P00338   | LDHA_HUMAN  | L-lactate dehydrogenase A chain                                  | OS=Homo sapiens | GN=LDHA     | PE=1  | SV=2 |            |         |         |               |             |                     |                    |  |     |     |         |         |         |      |   |     |           |                       |       |    |   |
|             |          |       |                   |       |     |          |             |                                                                  |                 |             |       |      |            |         |         |               |             |                     |                    |  | 107 | 112 | 371.78  | 741.54  | 741.45  | 0.09 | 0 | 41  | 0.0044581 | R.LNLVQR.N            | 22.94 | 19 | 1 |
|             |          |       |                   |       |     |          |             |                                                                  |                 |             |       |      |            |         |         |               |             |                     |                    |  | 158 | 169 | 624.84  | 1247.67 | 1247.59 | 0.08 | 0 | 75  | 2.14E-06  | R.VIGSGCNLDSAR.F      | 21.31 |    |   |
|             |          |       |                   |       |     |          |             |                                                                  |                 |             |       |      |            |         |         |               |             |                     |                    |  | 306 | 315 | 567.84  | 1133.67 | 1133.56 | 0.11 | 0 | 51  | 0.0006446 | K.VTLTSEEAR.L         | 20.79 |    |   |
| Q99623      | 7%       | 116   | 2                 | 33276 | 9.8 | Q99623   | PHB2_HUMAN  | Prohibitin-2                                                     | OS=Homo sapiens | GN=PHB2     | PE=1  | SV=2 |            |         |         |               |             |                     |                    |  |     |     |         |         |         |      |   |     |           |                       |       |    |   |
|             |          |       |                   |       |     |          |             |                                                                  |                 |             |       |      |            |         |         |               |             |                     |                    |  | 148 | 157 | 589.37  | 1176.73 | 1176.63 | 0.11 | 0 | 44  | 0.003272  | K.FNASQLITQR.A        | 29.56 | 19 | 3 |
|             |          |       |                   |       |     |          |             |                                                                  |                 |             |       |      |            |         |         |               |             |                     |                    |  | 225 | 236 | 608.38  | 1214.74 | 1214.61 | 0.12 | 0 | 72  | 5.33E-06  | K.IVQAEGEAAK.M        | 19.01 |    |   |
| Q9H444      | 16%      | 253   | 3 (4)             | 24935 | 4.8 | Q9H444   | CHM4B_HUMAN | Charged multivesicular body protein 4b                           | OS=Homo sapiens | GN=CHMP4B   | PE=1  | SV=1 |            |         |         |               |             |                     |                    |  |     |     |         |         |         |      |   |     |           |                       |       |    |   |
|             |          |       |                   |       |     |          |             |                                                                  |                 |             |       |      |            |         |         |               |             |                     |                    |  | 18  | 28  | 577.38  | 1152.75 | 1152.59 | 0.16 | 0 | 54  | 0.000289  | K.GGPTPQEAIQR.L       | 20.59 | 20 | 2 |
|             |          |       |                   |       |     |          |             |                                                                  |                 |             |       |      |            |         |         |               |             |                     |                    |  | 46  | 55  | 565.92  | 1129.82 | 1129.63 | 0.19 | 1 | 56  | 0.0001598 | K.KIEQELTAAK.K        | 19.57 |    |   |
|             |          |       |                   |       |     |          |             |                                                                  |                 |             |       |      |            |         |         |               |             |                     |                    |  | 46  | 56  | 420.3   | 1257.87 | 1257.73 | 0.14 | 2 | 43  | 0.0035939 | K.KIEQELTAAK.H        | 18.53 |    |   |
|             |          |       |                   |       |     |          |             |                                                                  |                 |             |       |      |            |         |         |               |             |                     |                    |  | 94  | 107 | 773.48  | 1544.94 | 1544.77 | 0.17 | 0 | 102 | 4.29E-09  | R.EALENANTNTEVLK.N    | 27.04 |    |   |
| P45880      | 12%      | 164   | 3                 | 32060 | 7.5 | P45880   | VDAC2_HUMAN | Voltage-dependent anion-selective channel protein 2              | OS=Homo sapiens | GN=VDAC2    | PE=1  | SV=2 |            |         |         |               |             |                     |                    |  |     |     |         |         |         |      |   |     |           |                       |       |    |   |
|             |          |       |                   |       |     |          |             |                                                                  |                 |             |       |      |            |         |         |               |             |                     |                    |  | 108 | 120 | 714.97  | 1427.92 | 1427.69 | 0.23 | 0 | 62  | 4.04E-05  | K.LTFDITTFSPNTGK.K    | 30.47 | 20 | 3 |
|             |          |       |                   |       |     |          |             |                                                                  |                 |             |       |      |            |         |         |               |             |                     |                    |  | 236 | 247 | 647.39  | 1292.77 | 1292.66 | 0.11 | 0 | 39  | 0.0092247 | K.YQLDPTASISAK.V      | 28.65 |    |   |
|             |          |       |                   |       |     |          |             |                                                                  |                 |             |       |      |            |         |         |               |             |                     |                    |  | 268 | 277 | 508.85  | 1015.68 | 1015.59 | 0.09 | 0 | 63  | 4.56E-05  | K.LTLSALVDGK.S        | 31.56 |    |   |
| P09525      | 6%       | 103   | 2                 | 36088 | 5.8 | P09525   | ANXA4_HUMAN | Annexin A4                                                       | OS=Homo sapiens | GN=ANXA4    | PE=1  | SV=4 |            |         |         |               |             |                     |                    |  |     |     |         |         |         |      |   |     |           |                       |       |    |   |
|             |          |       |                   |       |     |          |             |                                                                  |                 |             |       |      |            |         |         |               |             |                     |                    |  | 260 | 270 | 587.86  | 1173.7  | 1173.6  | 0.1  | 0 | 65  | 2.35E-05  | K.KLGTDDNTLIR.V       | 28.48 | 20 | 1 |
|             |          |       |                   |       |     |          |             |                                                                  |                 |             |       |      |            |         |         |               |             |                     |                    |  | 276 | 284 | 546.31  | 1090.61 | 1090.53 | 0.07 | 0 | 37  | 0.0141816 | R.AEIDMLDIR.A         | 29.48 |    |   |
| P36543      | 21%      | 217   | 5                 | 26186 | 7.7 | P36543   | VATE1_HUMAN | Vacuolar proton pump subunit E 1                                 | OS=Homo sapiens | GN=ATP6V1E1 | PE=1  | SV=1 |            |         |         |               |             |                     |                    |  |     |     |         |         |         |      |   |     |           |                       |       |    |   |
|             |          |       |                   |       |     |          |             |                                                                  |                 |             |       |      |            |         |         |               |             |                     |                    |  | 34  | 42  | 554.81  | 1107.6  | 1107.51 | 0.09 | 0 | 50  | 0.0006516 | K.AEEEFNIEK.G         | 27.83 | 21 | 2 |
|             |          |       |                   |       |     |          |             |                                                                  |                 |             |       |      |            |         |         |               |             |                     |                    |  | 53  | 59  | 496.31  | 990.61  | 990.44  | 0.17 | 0 | 35  | 0.0238757 | K.IMEYYEK.K           | 21.09 |    |   |
|             |          |       |                   |       |     |          |             |                                                                  |                 |             |       |      |            |         |         |               |             |                     |                    |  | 70  | 80  | 669.38  | 1336.74 | 1336.62 | 0.12 | 0 | 46  | 0.0016777 | K.IQMSNLMNQAR.L       | 19.02 |    |   |
|             |          |       |                   |       |     |          |             |                                                                  |                 |             |       |      |            |         |         |               |             |                     |                    |  | 192 | 199 | 453.26  | 904.51  | 904.46  | 0.05 | 0 | 40  | 0.0083506 | K.VSNTLESRL           | 18.72 |    |   |
|             |          |       |                   |       |     |          |             |                                                                  |                 |             |       |      |            |         |         |               |             |                     |                    |  | 200 | 212 | 788.46  | 1574.91 | 1574.78 | 0.13 | 0 | 46  | 0.0018809 | R.LDLIAQQMMEVPR.G     | 29.43 |    |   |
| Q16698      | 14%      | 217   | 4                 | 36330 | 9.3 | Q16698   | DECR_HUMAN  | 2,4-dienoyl-CoA reductase, mitochondrial                         | OS=Homo sapiens | GN=DECR1    | PE=1  | SV=1 |            |         |         |               |             |                     |                    |  |     |     |         |         |         |      |   |     |           |                       |       |    |   |
|             |          |       |                   |       |     |          |             |                                                                  |                 |             |       |      |            |         |         |               |             |                     |                    |  | 50  | 60  | 603.33  | 1204.66 | 1204.59 | 0.06 | 0 | 34  | 0.0297528 | K.AMLPPNSFQK.V        | 25.43 | 21 | 1 |
|             |          |       |                   |       |     |          |             |                                                                  |                 |             |       |      |            |         |         |               |             |                     |                    |  | 61  | 73  | 589.39  | 1176.77 | 1176.65 | 0.12 | 0 | 48  | 0.001101  | K.VAFITGGTGLGK.G      | 29.69 |    |   |
|             |          |       |                   |       |     |          |             |                                                                  |                 |             |       |      |            |         |         |               |             |                     |                    |  | 98  | 110 | 667.86  | 1333.71 | 1333.65 | 0.06 | 0 | 80  | 7.06E-07  | K.ATAEQISSQTGNK.V     | 18.63 |    |   |
|             |          |       |                   |       |     |          |             |                                                                  |                 |             |       |      |            |         |         |               |             |                     |                    |  | 235 | 244 | 556.88  | 1111.75 | 1111.64 | 0.11 | 0 | 54  | 0.0002387 | R.FNVIQPGPIK.T        | 29.82 |    |   |
| P50897      | 14%      | 194   | 3                 | 34627 | 6.1 | P50897   | PPT1_HUMAN  | Palmitoyl-protein thioesterase 1                                 | OS=Homo sapiens | GN=PPT1     | PE=1  | SV=1 |            |         |         |               |             |                     |                    |  |     |     |         |         |         |      |   |     |           |                       |       |    |   |
|             |          |       |                   |       |     |          |             |                                                                  |                 |             |       |      |            |         |         |               |             |                     |                    |  | 105 | 122 | 1009.56 | 2017.12 | 2016.95 | 0.17 | 0 | 66  | 1.58E-05  | K.LQQGYNAMFGSQGQFLR.A | 30.34 | 21 | 4 |
|             |          |       |                   |       |     |          |             |                                                                  |                 |             |       |      |            |         |         |               |             |                     |                    |  | 166 | 174 | 462.79  | 923.56  | 923.47  | 0.09 | 0 | 56  | 0.0001738 | K.TLNAGAYSK.V         | 19.71 |    |   |
|             |          |       |                   |       |     |          |             |                                                                  |                 |             |       |      |            |         |         |               |             |                     |                    |  | 254 | 268 | 897.5   | 1792.99 | 1792.88 | 0.11 | 0 | 72  | 3.64E-06  | K.ETIPLQETSPLYTQDR.L  | 30.38 |    |   |
| P27105      | 8%       | 89    | 2                 | 31882 | 7.7 | P27105   | STOM_HUMAN  | Erythrocyte band 7 integral membrane protein                     | OS=Homo sapiens | GN=STOM     | PE=1  | SV=3 |            |         |         |               |             |                     |                    |  |     |     |         |         |         |      |   |     |           |                       |       |    |   |
|             |          |       |                   |       |     |          |             |                                                                  |                 |             |       |      |            |         |         |               |             |                     |                    |  | 221 | 232 | 632.36  | 1262.7  | 1262.59 | 0.11 | 0 | 32  | 0.0423856 | K.VIAAEGEMNASR.A      | 18.76 | 21 | 2 |
|             |          |       |                   |       |     |          |             |                                                                  |                 |             |       |      |            |         |         |               |             |                     |                    |  | 252 | 263 | 676.44  | 1350.86 | 1350.74 | 0.12 | 0 | 56  | 0.000155  | R.YLQTLTIIAAEK.N      | 30.21 |    |   |
| accession # | coverage | score | distinct peptides | mass  | pl  | start AA | end AA      | m/z obs                                                          | M obs           | M calc      | delta | miss | pept score | exp val | peptide | modifications | retent time | Strongest gel slice | # gel slices found |  |     |     |         |         |         |      |   |     |           |                       |       |    |   |



|             |          |       |                   |       |     |                                                                                           |               |         |       |        |       |      |            |         |         |               |             |                     |                    |
|-------------|----------|-------|-------------------|-------|-----|-------------------------------------------------------------------------------------------|---------------|---------|-------|--------|-------|------|------------|---------|---------|---------------|-------------|---------------------|--------------------|
| Q9H0U4      | 11%      | 73    | 2                 | 22328 | 5.5 | Q9H0U4 RAB1B_HUMAN Ras-related protein Rab-1B OS=Homo sapiens GN=RAB1B PE=1 SV=1          |               |         |       |        |       |      |            |         |         |               |             | 26                  | 2                  |
|             |          |       |                   |       |     | 49 55 388.23 774.45 774.41 0.04 0 34 0.0403395 R.TIELDGK.T                                |               |         |       |        |       |      |            |         |         |               |             | 22.07               |                    |
|             |          |       |                   |       |     | 173 187 486.6 1456.77 1456.71 0.06 0 39 0.0098659 R.MGPGAASGGERP.NLK.I                    | Oxidation (M) |         |       |        |       |      |            |         |         |               |             | 17.59               |                    |
| accession # | coverage | score | distinct peptides | mass  | pl  | start AA                                                                                  | end AA        | m/z obs | M obs | M calc | delta | miss | pept score | exp val | peptide | modifications | retent time | Strongest gel slice | # gel slices found |
| P20339      | 11%      | 84    | 2                 | 23872 | 8.3 | P20339 RAB5A_HUMAN Ras-related protein Rab-5A OS=Homo sapiens GN=RAB5A PE=1 SV=2          |               |         |       |        |       |      |            |         |         |               |             | 26                  | 2                  |
|             |          |       |                   |       |     | 23 33 543.34 1084.67 1084.65 0.02 0 39 0.0107239 K.LVLLGESAVGK.S                          |               |         |       |        |       |      |            |         |         |               |             | 27.27               |                    |
|             |          |       |                   |       |     | 184 195 627.84 1253.66 1253.57 0.09 0 46 0.001901 K.NEPQNP.GANSAR.G                       |               |         |       |        |       |      |            |         |         |               |             | 16.49               |                    |
| accession # | coverage | score | distinct peptides | mass  | pl  | start AA                                                                                  | end AA        | m/z obs | M obs | M calc | delta | miss | pept score | exp val | peptide | modifications | retent time | Strongest gel slice | # gel slices found |
| P61006      | 11%      | 156   | 3                 | 23824 | 9.2 | P61006 RAB8A_HUMAN Ras-related protein Rab-8A OS=Homo sapiens GN=RAB8A PE=1 SV=1          |               |         |       |        |       |      |            |         |         |               |             | 26                  | 2                  |
|             |          |       |                   |       |     | 49 55 388.23 774.45 774.41 0.04 0 34 0.0403395 R.TIELDGK.R                                |               |         |       |        |       |      |            |         |         |               |             | 22.07               |                    |
|             |          |       |                   |       |     | 176 190 514.96 1541.87 1541.78 0.09 1 59 8.39E-05 K.KLEGNSPQGS.NQGVK.I                    |               |         |       |        |       |      |            |         |         |               |             | 16.45               |                    |
|             |          |       |                   |       |     | 177 190 707.9 1413.78 1413.68 0.09 0 63 3.39E-05 K.LEGNSPQGS.NQGVK.I                      |               |         |       |        |       |      |            |         |         |               |             | 16.85               |                    |
| accession # | coverage | score | distinct peptides | mass  | pl  | start AA                                                                                  | end AA        | m/z obs | M obs | M calc | delta | miss | pept score | exp val | peptide | modifications | retent time | Strongest gel slice | # gel slices found |
| Q06830      | 11%      | 124   | 2                 | 22324 | 8.3 | Q06830 PRDX1_HUMAN Peroxiredoxin-1 OS=Homo sapiens GN=PRDX1 PE=1 SV=1                     |               |         |       |        |       |      |            |         |         |               |             | 26                  | 2                  |
|             |          |       |                   |       |     | 111 120 554.34 1106.66 1106.6 0.06 0 35 0.0232287 R.TIAQDYGV.LK.A                         |               |         |       |        |       |      |            |         |         |               |             | 26.45               |                    |
|             |          |       |                   |       |     | 141 151 606.37 1210.73 1210.67 0.06 0 58 0.000101 R.QITVNDLP.VGR.S                        |               |         |       |        |       |      |            |         |         |               |             | 26.75               |                    |
| accession # | coverage | score | distinct peptides | mass  | pl  | start AA                                                                                  | end AA        | m/z obs | M obs | M calc | delta | miss | pept score | exp val | peptide | modifications | retent time | Strongest gel slice | # gel slices found |
| Q92930      | 10%      | 113   | 2                 | 23740 | 9.2 | Q92930 RAB8B_HUMAN Ras-related protein Rab-8B OS=Homo sapiens GN=RAB8B PE=1 SV=2          |               |         |       |        |       |      |            |         |         |               |             | 26                  | 2                  |
|             |          |       |                   |       |     | 49 55 388.23 774.45 774.41 0.04 0 34 0.0403395 R.TIELDGK.K                                |               |         |       |        |       |      |            |         |         |               |             | 22.07               |                    |
|             |          |       |                   |       |     | 177 190 660.83 1319.65 1319.58 0.07 0 79 8.35E-07 K.MNDSNSAGAG.PVK.I                      | Oxidation (M) |         |       |        |       |      |            |         |         |               |             | 16.63               |                    |
| accession # | coverage | score | distinct peptides | mass  | pl  | start AA                                                                                  | end AA        | m/z obs | M obs | M calc | delta | miss | pept score | exp val | peptide | modifications | retent time | Strongest gel slice | # gel slices found |
| O75396      | 9%       | 74    | 2                 | 24896 | 8.7 | O75396 SC22B_HUMAN Vesicle-trafficking protein SEC22b OS=Homo sapiens GN=SEC22B PE=1 SV=3 |               |         |       |        |       |      |            |         |         |               |             | 26                  | 1                  |
|             |          |       |                   |       |     | 29 38 604.82 1207.63 1207.58 0.04 0 42 0.0045775 R.DLQQY.QSAK.Q                           |               |         |       |        |       |      |            |         |         |               |             | 20.8                |                    |
|             |          |       |                   |       |     | 170 178 467.27 932.53 932.49 0.04 0 33 0.0484457 K.ANNLS.SLSK.K                           |               |         |       |        |       |      |            |         |         |               |             | 20.09               |                    |
| accession # | coverage | score | distinct peptides | mass  | pl  | start AA                                                                                  | end AA        | m/z obs | M obs | M calc | delta | miss | pept score | exp val | peptide | modifications | retent time | Strongest gel slice | # gel slices found |
| Q15907      | 9%       | 103   | 2                 | 24588 | 5.6 | Q15907 RB11B_HUMAN Ras-related protein Rab-11B OS=Homo sapiens GN=RAB11B PE=1 SV=4        |               |         |       |        |       |      |            |         |         |               |             | 26                  | 1                  |
|             |          |       |                   |       |     | 14 24 522.34 1042.66 1042.6 0.05 0 54 0.0003506 K.VV.LIGDSGVGK.S                          |               |         |       |        |       |      |            |         |         |               |             | 26.1                |                    |
|             |          |       |                   |       |     | 34 41 490.77 979.53 979.46 0.07 0 49 0.0008339 R.NEFNLESK.S                               |               |         |       |        |       |      |            |         |         |               |             | 25.54               |                    |
| accession # | coverage | score | distinct peptides | mass  | pl  | start AA                                                                                  | end AA        | m/z obs | M obs | M calc | delta | miss | pept score | exp val | peptide | modifications | retent time | Strongest gel slice | # gel slices found |
| P51149      | 29%      | 235   | 5                 | 23760 | 6.4 | P51149 RAB7A_HUMAN Ras-related protein Rab-7a OS=Homo sapiens GN=RAB7A PE=1 SV=1          |               |         |       |        |       |      |            |         |         |               |             | 27                  | 2                  |
|             |          |       |                   |       |     | 11 21 529.34 1056.66 1056.62 0.04 0 40 0.0086389 K.VIILGDSGVGK.T                          |               |         |       |        |       |      |            |         |         |               |             | 26.48               |                    |
|             |          |       |                   |       |     | 22 31 607.34 1212.67 1212.58 0.09 0 40 0.0066044 K.TSLMNQY.VNK.K                          | Oxidation (M) |         |       |        |       |      |            |         |         |               |             | 20.34               |                    |
|             |          |       |                   |       |     | 114 126 738.44 1474.86 1474.75 0.11 0 47 0.0014694 R.DPENFPF.VLGNK.I                      |               |         |       |        |       |      |            |         |         |               |             | 30.23               |                    |
|             |          |       |                   |       |     | 147 157 642.35 1282.68 1282.62 0.06 0 36 0.0161029 K.NNIPYF.TSAK.E                        |               |         |       |        |       |      |            |         |         |               |             | 26.66               |                    |
|             |          |       |                   |       |     | 158 171 795.48 1588.94 1588.82 0.12 0 72 4.16E-06 K.EAINVEQAF.QTIAR.N                     |               |         |       |        |       |      |            |         |         |               |             | 29.45               |                    |
| accession # | coverage | score | distinct peptides | mass  | pl  | start AA                                                                                  | end AA        | m/z obs | M obs | M calc | delta | miss | pept score | exp val | peptide | modifications | retent time | Strongest gel slice | # gel slices found |
| P51153      | 18%      | 167   | 3                 | 22988 | 9.3 | P51153 RAB13_HUMAN Ras-related protein Rab-13 OS=Homo sapiens GN=RAB13 PE=2 SV=1          |               |         |       |        |       |      |            |         |         |               |             | 27                  | 2                  |
|             |          |       |                   |       |     | 11 21 536.36 1070.71 1070.63 0.08 0 45 0.0025904 K.LLLIGDSGVGK.T                          |               |         |       |        |       |      |            |         |         |               |             | 27.74               |                    |
|             |          |       |                   |       |     | 105 116 420.91 1259.71 1259.65 0.06 1 39 0.009008 K.SIKENASAG.VER.L                       |               |         |       |        |       |      |            |         |         |               |             | 17.02               |                    |

| accession # | coverage | score | distinct peptides | mass   | pl   | start AA | end AA      | m/z obs                                     | M obs           | M calc      | delta | miss | pept score | exp val   | peptide              | modifications | retent time | Strongest gel slice | # gel slices found |
|-------------|----------|-------|-------------------|--------|------|----------|-------------|---------------------------------------------|-----------------|-------------|-------|------|------------|-----------|----------------------|---------------|-------------|---------------------|--------------------|
|             |          |       |                   |        |      | 154      | 167         | 765.37                                      | 1528.73         | 1528.68     | 0.05  | 0    | 83         | 3.57E-07  | K.SSMNVDEAFSSLAR.D   | Oxidation (M) |             | 27.44               |                    |
| P37802      | 17%      | 123   | 3                 | 22548  | 8.4  | start AA | end AA      | m/z obs                                     | M obs           | M calc      | delta | miss | pept score | exp val   | peptide              | modifications | retent time | Strongest gel slice | # gel slices found |
|             |          |       |                   |        |      | P37802   | TAGL2_HUMAN | Transgelin-2                                | OS=Homo sapiens | GN=TAGLN2   | PE=1  | SV=3 |            |           |                      |               |             | 27                  | 2                  |
|             |          |       |                   |        |      | 128      | 139         | 616.38                                      | 1230.75         | 1230.68     | 0.07  | 0    | 40         | 0.0080236 | R.TLMNLGGLAVAR.D     | Oxidation (M) |             | 27.13               |                    |
|             |          |       |                   |        |      | 161      | 171         | 640.33                                      | 1278.64         | 1278.58     | 0.06  | 0    | 39         | 0.0078542 | R.NFSDNQLQEGK.N      | Oxidation (M) |             | 23.23               |                    |
|             |          |       |                   |        |      | 172      | 182         | 609.86                                      | 1217.7          | 1217.62     | 0.08  | 0    | 44         | 0.003538  | K.NVIGLQMGITNR.G     | Oxidation (M) |             | 24.92               |                    |
| P04179      | 14%      | 146   | 3                 | 24878  | 8.3  | start AA | end AA      | m/z obs                                     | M obs           | M calc      | delta | miss | pept score | exp val   | peptide              | modifications | retent time | Strongest gel slice | # gel slices found |
|             |          |       |                   |        |      | P04179   | SODM_HUMAN  | Superoxide dismutase [Mn], mitochondrial    | OS=Homo sapiens | GN=SOD2     | PE=1  | SV=2 |            |           |                      |               |             | 27                  | 1                  |
|             |          |       |                   |        |      | 69       | 75          | 411.74                                      | 821.47          | 821.43      | 0.04  | 0    | 46         | 0.0018953 | K.YQEALAK.G          |               |             | 17.94               |                    |
|             |          |       |                   |        |      | 76       | 89          | 712.94                                      | 1423.86         | 1423.8      | 0.06  | 0    | 62         | 3.97E-05  | K.GDVTQAQLQALPALK.F  |               |             | 27.05               |                    |
|             |          |       |                   |        |      | 115      | 123         | 514.84                                      | 1027.67         | 1027.6      | 0.07  | 1    | 38         | 0.0114649 | K.GELLEAIKR.D        |               |             | 25.7                |                    |
| P62820      | 11%      | 96    | 2                 | 22891  | 5.9  | start AA | end AA      | m/z obs                                     | M obs           | M calc      | delta | miss | pept score | exp val   | peptide              | modifications | retent time | Strongest gel slice | # gel slices found |
|             |          |       |                   |        |      | P62820   | RAB1A_HUMAN | Ras-related protein Rab-1A                  | OS=Homo sapiens | GN=RAB1A    | PE=1  | SV=3 |            |           |                      |               |             | 27                  | 3                  |
|             |          |       |                   |        |      | 14       | 24          | 536.36                                      | 1070.71         | 1070.63     | 0.08  | 0    | 45         | 0.0025904 | K.LLLIGDSGVGK.S      |               |             | 27.74               |                    |
|             |          |       |                   |        |      | 176      | 187         | 531.78                                      | 1061.55         | 1061.48     | 0.07  | 0    | 51         | 0.0006889 | R.MGPGATAGGAEK.S     | Oxidation (M) |             | 16.16               |                    |
| P48047      | 9%       | 113   | 2                 | 23377  | 10   | start AA | end AA      | m/z obs                                     | M obs           | M calc      | delta | miss | pept score | exp val   | peptide              | modifications | retent time | Strongest gel slice | # gel slices found |
|             |          |       |                   |        |      | P48047   | ATPO_HUMAN  | ATP synthase subunit O, mitochondrial       | OS=Homo sapiens | GN=ATP5O    | PE=1  | SV=1 |            |           |                      |               |             | 27                  | 1                  |
|             |          |       |                   |        |      | 65       | 73          | 513.34                                      | 1024.66         | 1024.63     | 0.03  | 1    | 55         | 0.0002038 | R.VAQLKKEPK.V        |               |             | 19.79               |                    |
|             |          |       |                   |        |      | 74       | 84          | 580.87                                      | 1159.73         | 1159.66     | 0.07  | 0    | 58         | 0.0001146 | K.VAASVLNPNYVK.R     |               |             | 26.57               |                    |
| P63000      | 9%       | 176   | 2                 | 21835  | 8.8  | start AA | end AA      | m/z obs                                     | M obs           | M calc      | delta | miss | pept score | exp val   | peptide              | modifications | retent time | Strongest gel slice | # gel slices found |
|             |          |       |                   |        |      | P63000   | RAC1_HUMAN  | Ras-related C3 botulinum toxin substrate 1  | OS=Homo sapiens | GN=RAC1     | PE=1  | SV=1 |            |           |                      |               |             | 28                  | 1                  |
|             |          |       | redundant         |        |      | 154      | 163         | 620.84                                      | 1239.66         | 1239.59     | 0.06  | 0    | 59         | 7.92E-05  | K.YLECSALTQR.G       |               |             | 25.64               |                    |
|             |          |       |                   |        |      | 167      | 174         | 475.78                                      | 949.54          | 949.49      | 0.06  | 0    | 42         | 0.0043027 | K.TVFDEAIR.A         |               |             | 26.56               |                    |
| P23284      | 16%      | 127   | 3                 | 22785  | 9.3  | start AA | end AA      | m/z obs                                     | M obs           | M calc      | delta | miss | pept score | exp val   | peptide              | modifications | retent time | Strongest gel slice | # gel slices found |
|             |          |       |                   |        |      | P23284   | PIIB_HUMAN  | Peptidyl-prolyl cis-trans isomerase B       | OS=Homo sapiens | GN=PIIB     | PE=1  | SV=1 |            |           |                      |               |             | 29                  | 1                  |
|             |          |       |                   |        |      | 44       | 51          | 430.74                                      | 859.47          | 859.4       | 0.06  | 0    | 51         | 0.0008317 | R.IGDEDVGR.V         |               |             | 18.04               |                    |
|             |          |       |                   |        |      | 64       | 76          | 682.88                                      | 1363.76         | 1363.7      | 0.06  | 0    | 38         | 0.0118524 | K.TVDNFDVALATGEK.G   |               |             | 28.51               |                    |
|             |          |       |                   |        |      | 138      | 150         | 729.42                                      | 1456.82         | 1456.72     | 0.1   | 0    | 40         | 0.0077293 | K.DTINGSQFFITTVK.T   |               |             | 28.34               |                    |
| O14950      | 12%      | 114   | 2                 | 19824  | 4.7  | start AA | end AA      | m/z obs                                     | M obs           | M calc      | delta | miss | pept score | exp val   | peptide              | modifications | retent time | Strongest gel slice | # gel slices found |
|             |          |       |                   |        |      | O14950   | MRLC2_HUMAN | Myosin regulatory light chain               | OS=Homo sapiens | GN=MRLC2    | PE=1  | SV=2 |            |           |                      |               |             | 30                  | 1                  |
|             |          |       |                   |        |      | 36       | 45          | 627.32                                      | 1252.62         | 1252.55     | 0.07  | 0    | 66         | 1.69E-05  | K.EAFNMIDQNR.D       | Oxidation (M) |             | 24.58               |                    |
|             |          |       |                   |        |      | 94       | 104         | 614.84                                      | 1227.66         | 1227.61     | 0.05  | 0    | 48         | 0.0014159 | K.LNGTDPEDVIR.N      | Oxidation (M) |             | 25.84               |                    |
| O15511      | 17%      | 74    | 2                 | 16367  | 5.5  | start AA | end AA      | m/z obs                                     | M obs           | M calc      | delta | miss | pept score | exp val   | peptide              | modifications | retent time | Strongest gel slice | # gel slices found |
|             |          |       |                   |        |      | O15511   | ARPC5_HUMAN | Actin-related protein 2/3 complex subunit 5 | OS=Homo sapiens | GN=ARPC5    | PE=1  | SV=3 |            |           |                      |               |             | 31                  | 1                  |
|             |          |       |                   |        |      | 48       | 60          | 666.86                                      | 1331.71         | 1331.69     | 0.02  | 0    | 37         | 0.0147893 | R.QGNMTAALQALK.N     | Oxidation (M) |             | 25.86               |                    |
|             |          |       |                   |        |      | 132      | 143         | 535.83                                      | 1069.66         | 1069.62     | 0.03  | 0    | 37         | 0.0170087 | K.ALAAGGVGSIVR.V     | Oxidation (M) |             | 25.95               |                    |
| Q5QNW6      | 14%      | 78    | 2                 | 13912  | 10.3 | start AA | end AA      | m/z obs                                     | M obs           | M calc      | delta | miss | pept score | exp val   | peptide              | modifications | retent time | Strongest gel slice | # gel slices found |
|             |          |       |                   |        |      | Q5QNW6   | H2B2F_HUMAN | Histone H2B type 2-F OS=Homo sapiens        | GN=HIST2H2BF    | PE=1        | SV=3  |      |            |           |                      |               |             | 32                  | 1                  |
|             |          |       |                   |        |      | 48       | 58          | 390.21                                      | 1167.62         | 1167.59     | 0.03  | 0    | 42         | 0.0040148 | K.QVHPDTGISSK.A      |               |             | 16.9                |                    |
|             |          |       |                   |        |      | 94       | 100         | 408.74                                      | 815.47          | 815.45      | 0.02  | 0    | 36         | 0.0255012 | R.EIQTAVR.L          |               |             | 17.88               |                    |
| P60660      | 26%      | 163   | 3                 | 17090  | 4.6  | start AA | end AA      | m/z obs                                     | M obs           | M calc      | delta | miss | pept score | exp val   | peptide              | modifications | retent time | Strongest gel slice | # gel slices found |
|             |          |       |                   |        |      | P60660   | MYL6_HUMAN  | Myosin light polypeptide 6                  | OS=Homo sapiens | GN=MYL6     | PE=1  | SV=2 |            |           |                      |               |             | 33                  | 1                  |
|             |          |       |                   |        |      | 27       | 37          | 679.32                                      | 1356.62         | 1356.62     | 0     | 0    | 37         | 0.0158523 | K.ILYSQCGDVMR.A      | Oxidation (M) |             | 24.57               |                    |
|             |          |       |                   |        |      | 38       | 50          | 677.88                                      | 1353.74         | 1353.73     | 0.02  | 0    | 70         | 6.63E-06  | R.ALGNQPTNAEVLK.V    | Oxidation (M) |             | 25.09               |                    |
|             |          |       |                   |        |      | 95       | 110         | 580.3                                       | 1737.86         | 1737.84     | 0.03  | 1    | 56         | 0.0001539 | R.VFDKEGNGTVMGAEIR.H | Oxidation (M) |             | 24.44               |                    |
| P30049      | 14%      | 104   | 2                 | 17479  | 5.4  | start AA | end AA      | m/z obs                                     | M obs           | M calc      | delta | miss | pept score | exp val   | peptide              | modifications | retent time | Strongest gel slice | # gel slices found |
|             |          |       |                   |        |      | P30049   | ATPD_HUMAN  | ATP synthase subunit delta, mitochondrial   | OS=Homo sapiens | GN=ATPD     | PE=1  | SV=2 |            |           |                      |               |             | 33                  | 2                  |
|             |          |       |                   |        |      | 137      | 150         | 716.37                                      | 1430.72         | 1430.7      | 0.02  | 0    | 72         | 4.72E-06  | K.AQAELVGTADAEATR.A  |               |             | 24.79               |                    |
|             |          |       |                   |        |      | 157      | 165         | 493.79                                      | 985.57          | 985.54      | 0.02  | 0    | 33         | 0.0412667 | R.IEANEALVK.A        |               |             | 23.87               |                    |
| P10253      | 3%       | 117   | 2                 | 106126 | 5.6  | start AA | end AA      | m/z obs                                     | M obs           | M calc      | delta | miss | pept score | exp val   | peptide              | modifications | retent time | Strongest gel slice | # gel slices found |
|             |          |       |                   |        |      | P10253   | LYAG_HUMAN  | Lysosomal alpha-glucosidase                 | OS=Homo sapiens | GN=GAA      | PE=1  | SV=2 |            |           |                      |               |             | 33                  | 4                  |
|             |          |       |                   |        |      | 838      | 849         | 643.86                                      | 1285.71         | 1285.71     | 0     | 0    | 51         | 0.0005608 | R.QQPMLAVALTK.G      | Oxidation (M) |             | 26.57               |                    |
|             |          |       |                   |        |      | 892      | 903         | 615.85                                      | 1229.69         | 1229.66     | 0.03  | 0    | 66         | 2.06E-05  | R.VTSEGAQLQLQK.V     | Oxidation (M) |             | 24.53               |                    |
| P62805      | 31%      | 116   | 3                 | 11360  | 11.4 | start AA | end AA      | m/z obs                                     | M obs           | M calc      | delta | miss | pept score | exp val   | peptide              | modifications | retent time | Strongest gel slice | # gel slices found |
|             |          |       |                   |        |      | P62805   | H4_HUMAN    | Histone H4                                  | OS=Homo sapiens | GN=HIST1H4A | PE=1  | SV=2 |            |           |                      |               |             | 34                  | 1                  |
|             |          |       |                   |        |      | 25       | 36          | 442.59                                      | 1324.75         | 1324.75     | 0.01  | 0    | 34         | 0.0266516 | R.DNIQGITKPAIR.R     |               |             | 24.75               |                    |
|             |          |       |                   |        |      | 47       | 56          | 590.83                                      | 1179.65         | 1179.61     | 0.03  | 0    | 49         | 0.0009237 | R.ISGLIYEETR.G       |               |             | 26.49               |                    |

| accession # | coverage | score | distinct peptides | mass  | pl  | start AA | end AA      | m/z obs                                  | M obs           | M calc   | delta   | miss    | pept score | exp val   | peptide        | modifications | retent time        | Strongest gel slice     | # gel slices found |    |   |
|-------------|----------|-------|-------------------|-------|-----|----------|-------------|------------------------------------------|-----------------|----------|---------|---------|------------|-----------|----------------|---------------|--------------------|-------------------------|--------------------|----|---|
|             |          |       |                   |       |     | 69       | 78          | 567.78                                   | 1133.55         | 1133.54  | 0.01    | 0       | 33         | 0.0385099 | R.DAVTYTEHAK.R |               | 17.73              |                         |                    |    |   |
| Q01469      | 13%      | 83    | 2                 | 15497 | 6.6 | Q01469   | FABP5_HUMAN | Fatty acid-binding protein, epidermal    | OS=Homo sapiens | GN=FABP5 | PE=1    | SV=3    |            |           |                | modifications | retent time        | Strongest gel slice     | # gel slices found |    |   |
|             |          |       |                   |       |     |          |             | 2                                        | 10              | 522.3    | 1042.58 | 1042.54 | 0.04       | 0         | 37             | 0.0156629     | M.ATVQQLLEGR.W     | Acetyl (Protein N-term) | 26.44              | 34 | 1 |
|             |          |       |                   |       |     |          |             | 73                                       | 81              | 513.24   | 1024.47 | 1024.45 | 0.02       | 0         | 45             | 0.0018716     | K.FEETTADGR.K      |                         | 17.64              |    |   |
| P22307      | 6%       | 146   | 3                 | 59640 | 6.4 | P22307   | NLTP_HUMAN  | Non-specific lipid-transfer protein      | OS=Homo sapiens | GN=SCP2  | PE=1    | SV=2    |            |           |                | modifications | retent time        | Strongest gel slice     | # gel slices found |    |   |
|             |          |       |                   |       |     |          |             | 483                                      | 492             | 522.81   | 1043.6  | 1043.56 | 0.04       | 1         | 37             | 0.0166371     | K.GSVLPNSDKK.A     |                         | 16.92              | 35 | 1 |
|             |          |       |                   |       |     |          |             | 512                                      | 522             | 635.81   | 1269.61 | 1269.58 | 0.03       | 0         | 66             | 1.93E-05      | K.MNPQSAFFQGK.L    | Oxidation (M)           | 25.98              |    |   |
|             |          |       |                   |       |     |          |             | 525                                      | 534             | 534.28   | 1066.55 | 1066.52 | 0.04       | 0         | 45             | 0.0020174     | K.ITGNMGLAMK.L     | 2 Oxidation (M)         | 17.38              |    |   |
| Q13510      | 5%       | 129   | 2                 | 45077 | 7.5 | Q13510   | ASAH1_HUMAN | Acid ceramidase                          | OS=Homo sapiens | GN=ASAH1 | PE=1    | SV=4    |            |           |                | modifications | retent time        | Strongest gel slice     | # gel slices found |    |   |
|             |          |       |                   |       |     |          |             | 82                                       | 92              | 612.33   | 1222.64 | 1222.6  | 0.04       | 0         | 58             | 0.0001191     | K.NMINTFVPSGK.V    | Oxidation (M)           | 25.76              | 35 | 5 |
|             |          |       |                   |       |     |          |             | 93                                       | 100             | 482.26   | 962.51  | 962.47  | 0.03       | 0         | 71             | 5.94E-06      | K.VMQVVDK.L        | Oxidation (M)           | 17.16              |    |   |
| P61604      | 41%      | 251   | 4                 | 10925 | 8.9 | P61604   | CH10_HUMAN  | 10 kDa heat shock protein, mitochondrial | OS=Homo sapiens | GN=HSP1  | PE=1    | SV=2    |            |           |                | modifications | retent time        | Strongest gel slice     | # gel slices found |    |   |
|             |          |       |                   |       |     |          |             | 29                                       | 36              | 430.75   | 859.49  | 859.45  | 0.04       | 0         | 53             | 0.0004797     | K.GGIMLPEK.S       | Oxidation (M)           | 25                 | 36 | 1 |
|             |          |       |                   |       |     |          |             | 41                                       | 54              | 658.41   | 1314.81 | 1314.75 | 0.06       | 0         | 91             | 5.60E-08      | K.VLQATVVAVGSGSK.G |                         | 25.3               |    |   |
|             |          |       |                   |       |     |          |             | 57                                       | 66              | 507.4    | 1012.79 | 1012.56 | 0.23       | 0         | 56             | 9.45E-05      | K.GGIEIPVSVK.V     |                         | 22.59              |    |   |
|             |          |       |                   |       |     |          |             | 71                                       | 80              | 538.82   | 1075.63 | 1075.59 | 0.03       | 0         | 52             | 0.00053       | K.VLLPEYGGTK.V     |                         | 26.13              |    |   |
| P07602      | 4%       | 93    | 2                 | 59899 | 5.1 | P07602   | SAP_HUMAN   | Proactivator polypeptide                 | OS=Homo sapiens | GN=PSAP  | PE=1    | SV=2    |            |           |                | modifications | retent time        | Strongest gel slice     | # gel slices found |    |   |
|             |          |       |                   |       |     |          |             | 430                                      | 438             | 507.82   | 1013.62 | 1013.58 | 0.05       | 0         | 47             | 0.0018151     | K.QEILAALK.G       |                         | 27.09              | 36 | 2 |
|             |          |       |                   |       |     |          |             | 439                                      | 449             | 656.33   | 1310.64 | 1310.6  | 0.04       | 0         | 46             | 0.0016732     | K.GCSFLDPYQK.Q     |                         | 27.26              |    |   |

**\*Footnotes to Supplemental Table 6:**

Data sets were searched with the Mascot search engine (see Perkins et al. (1999) *Electrophoresis* **20**, 3551-3567).

Detailed are the SwissProt accession number, the number of distinct proteolytic peptides (in some cases the number of observed redundant peptide sequences is indicated in parentheses), and the sequence coverage of the protein (%).

Listed is the Mascot protein score as well as the score and expectation value for the individual peptides.

Additional columns indicate the position of the protein in the 1D-SDS PAGE gel (strongest gel slice in which the protein was identified, and the total # of adjacent gel slices in which the protein was found).

Proteins identified by single-peptide assignments for this experiment are not listed in this Table but in Supplemental Table 12.



|      |      |        |         |         |       |   |    |           |                  |  |       |
|------|------|--------|---------|---------|-------|---|----|-----------|------------------|--|-------|
| 1448 | 1454 | 379.23 | 756.45  | 756.47  | -0.02 | 0 | 40 | 0.0085466 | R.DGIIVLK.Y      |  | 20.03 |
| 1536 | 1545 | 522.75 | 1043.49 | 1043.49 | 0     | 0 | 43 | 0.0045298 | R.AGFTAAYSEK.G   |  | 15.59 |
| 1715 | 1726 | 624.84 | 1247.67 | 1247.69 | -0.02 | 0 | 48 | 0.0012379 | K.VPIDGPPIDIGR.V |  | 20.16 |
| 1852 | 1862 | 553.78 | 1105.55 | 1105.54 | 0     | 0 | 62 | 4.53E-05  | K.DGGVCLLSGK.G   |  | 19.54 |
| 2087 | 2098 | 655.33 | 1308.64 | 1308.66 | -0.02 | 0 | 55 | 0.0002497 | K.TASSVIETLCTK.T |  | 19.41 |
| 2147 | 2156 | 588.79 | 1175.57 | 1175.59 | -0.02 | 0 | 42 | 0.0055869 | K.SFSLGDIYFK.L   |  | 21.87 |

| accession # | coverage | score  | stinct peptid | mass    | pl    | start AA          | end AA                   | m/z obs           | M obs                      | M calc | delta | miss | pept score | exp val   | peptide                    | modifications   | retent time | Strongest gel slice | # gel slices found |
|-------------|----------|--------|---------------|---------|-------|-------------------|--------------------------|-------------------|----------------------------|--------|-------|------|------------|-----------|----------------------------|-----------------|-------------|---------------------|--------------------|
| P35579      | 17%      | 1297   | 29            | 227646  | 5.5   | P35579 MYH9_HUMAN | Myosin-9 OS=Homo sapiens | GN=MYH9 PE=1 SV=4 |                            |        |       |      |            |           |                            |                 |             | 3                   | 2                  |
| 126         | 139      | 872.42 | 1742.83       | 1742.84 | -0.01 | 0                 | 37                       | 0.0118971         | K.NLPYSEEIVMYK.G           |        |       |      |            | 0.0118971 | K.NLPYSEEIVMYK.G           | Oxidation (M)   | 21.8        |                     |                    |
| 160         | 180      | 777.99 | 2330.96       | 2330.98 | -0.01 | 1                 | 36                       | 0.0143381         | R.SMMQDREDQSSILCTGESGAGK.T |        |       |      |            | 0.0143381 | R.SMMQDREDQSSILCTGESGAGK.T | 2 Oxidation (M) | 16.45       |                     |                    |
| 290         | 299      | 603.31 | 1204.62       | 1204.63 | -0.02 | 0                 | 51                       | 0.0005464         | K.TDLLLEPYNK.Y             |        |       |      |            | 0.0005464 | K.TDLLLEPYNK.Y             |                 | 20.85       |                     |                    |
| 359         | 373      | 804.34 | 1606.68       | 1606.69 | -0.01 | 0                 | 77                       | 1.29E-06          | R.NTDQASMPDNNTAAQK.V       |        |       |      |            | 1.29E-06  | R.NTDQASMPDNNTAAQK.V       | Oxidation (M)   | 11.98       |                     |                    |
| 408         | 419      | 653.33 | 1304.65       | 1304.66 | -0.01 | 0                 | 65                       | 2.28E-05          | K.EQADFAIEALAK.A           |        |       |      |            | 2.28E-05  | K.EQADFAIEALAK.A           |                 | 21.41       |                     |                    |
| 645         | 656      | 459.92 | 1376.73       | 1376.77 | -0.04 | 1                 | 38                       | 0.0114271         | R.TVGQLYKEQLAK.L           |        |       |      |            | 0.0114271 | R.TVGQLYKEQLAK.L           |                 | 16.75       |                     |                    |
| 694         | 702      | 509.26 | 1016.5        | 1016.51 | -0.01 | 0                 | 34                       | 0.0352981         | R.CNGVLGIR.I               |        |       |      |            | 0.0352981 | R.CNGVLGIR.I               |                 | 19.49       |                     |                    |
| 712         | 718      | 462.74 | 923.47        | 923.49  | -0.02 | 0                 | 38                       | 0.0093096         | R.VVQEFRR.Q                |        |       |      |            | 0.0093096 | R.VVQEFRR.Q                |                 | 20.23       |                     |                    |
| 746         | 755      | 597.31 | 1192.61       | 1192.61 | 0     | 0                 | 67                       | 1.43E-05          | K.ALELDSNLYR.I             |        |       |      |            | 1.43E-05  | K.ALELDSNLYR.I             |                 | 20.58       |                     |                    |
| 803         | 810      | 482.24 | 962.47        | 962.49  | -0.02 | 0                 | 39                       | 0.0092773         | R.QQQLTAMK.V               |        |       |      |            | 0.0092773 | R.QQQLTAMK.V               | Oxidation (M)   | 12.23       |                     |                    |
| 843         | 856      | 585.59 | 1753.73       | 1753.77 | -0.04 | 1                 | 37                       | 0.0141847         | R.QEEEMMAKEEELVK.V         |        |       |      |            | 0.0141847 | R.QEEEMMAKEEELVK.V         | 2 Oxidation (M) | 13.5        |                     |                    |
| 1001        | 1016     | 623.62 | 1867.85       | 1867.91 | -0.06 | 1                 | 64                       | 2.11E-05          | R.IAEFTTNLTETEEESK.S       |        |       |      |            | 2.11E-05  | R.IAEFTTNLTETEEESK.S       |                 | 19.75       |                     |                    |
| 1220        | 1234     | 577.3  | 1728.87       | 1728.86 | 0     | 1                 | 34                       | 0.0228497         | K.QTLENERGELANEVK.V        |        |       |      |            | 0.0228497 | K.QTLENERGELANEVK.V        |                 | 18.84       |                     |                    |
| 1248        | 1260     | 514.3  | 1539.87       | 1539.9  | -0.03 | 2                 | 32                       | 0.0402251         | R.KKVEAQLQELQVK.F          |        |       |      |            | 0.0402251 | R.KKVEAQLQELQVK.F          |                 | 15.36       |                     |                    |
| 1358        | 1370     | 481.24 | 1440.7        | 1440.74 | -0.04 | 0                 | 32                       | 0.0417398         | K.QIATLHAQVADMK.K          |        |       |      |            | 0.0417398 | K.QIATLHAQVADMK.K          | Oxidation (M)   | 13.89       |                     |                    |
| 1358        | 1371     | 393.2  | 1568.77       | 1568.83 | -0.06 | 1                 | 36                       | 0.0182068         | K.QIATLHAQVADMKK.K         |        |       |      |            | 0.0182068 | K.QIATLHAQVADMKK.K         | Oxidation (M)   | 12.97       |                     |                    |
| 1393        | 1400     | 459.23 | 916.45        | 916.46  | -0.01 | 0                 | 34                       | 0.0341302         | K.DLEGLSQR.H               |        |       |      |            | 0.0341302 | K.DLEGLSQR.H               |                 | 17.14       |                     |                    |
| 1405        | 1413     | 518.77 | 1035.53       | 1035.56 | -0.03 | 1                 | 33                       | 0.0346467         | K.VAAVDKLEK.T              |        |       |      |            | 0.0346467 | K.VAAVDKLEK.T              |                 | 13.28       |                     |                    |
| 1446        | 1454     | 546.77 | 1091.52       | 1091.55 | -0.03 | 0                 | 40                       | 0.0069388         | K.FDQLLAEEK.T              |        |       |      |            | 0.0069388 | K.FDQLLAEEK.T              |                 | 19.8        |                     |                    |
| 1484        | 1497     | 554.93 | 1661.76       | 1661.79 | -0.03 | 1                 | 58                       | 0.0001038         | R.ALEEAMQEKAELER.L         |        |       |      |            | 0.0001038 | R.ALEEAMQEKAELER.L         | Oxidation (M)   | 14.06       |                     |                    |
| 1504        | 1518     | 572.91 | 1715.71       | 1715.72 | -0.01 | 1                 | 56                       | 0.0001629         | R.TEMEDLMSSKDDVVGK.S       |        |       |      |            | 0.0001629 | R.TEMEDLMSSKDDVVGK.S       | 2 Oxidation (M) | 12.8        |                     |                    |
| 1529        | 1538     | 610.78 | 1219.55       | 1219.58 | -0.02 | 0                 | 39                       | 0.0096538         | R.ALEQVVEEMK.T             |        |       |      |            | 0.0096538 | R.ALEQVVEEMK.T             | Oxidation (M)   | 13.63       |                     |                    |
| 1659        | 1669     | 405.88 | 1214.62       | 1214.66 | -0.04 | 1                 | 35                       | 0.0268154         | R.ASREELIAQAK.E            |        |       |      |            | 0.0268154 | R.ASREELIAQAK.E            |                 | 13.45       |                     |                    |
| 1792        | 1802     | 426.55 | 1276.62       | 1276.67 | -0.05 | 1                 | 39                       | 0.0084324         | K.VKLQEMEGTVK.S            |        |       |      |            | 0.0084324 | K.VKLQEMEGTVK.S            | Oxidation (M)   | 12.71       |                     |                    |
| 1794        | 1802     | 525.75 | 1049.49       | 1049.51 | -0.01 | 0                 | 47                       | 0.0015262         | K.LQEMEGTVK.S              |        |       |      |            | 0.0015262 | K.LQEMEGTVK.S              | Oxidation (M)   | 12.41       |                     |                    |
| 1807        | 1815     | 452.25 | 902.5         | 902.51  | -0.01 | 0                 | 34                       | 0.0330467         | K.ASITALEAK.I              |        |       |      |            | 0.0330467 | K.ASITALEAK.I              |                 | 16.62       |                     |                    |
| 1816        | 1828     | 765.87 | 1529.73       | 1529.76 | -0.03 | 0                 | 38                       | 0.0101507         | K.IAQLEEQLDNETK.E          |        |       |      |            | 0.0101507 | K.IAQLEEQLDNETK.E          |                 | 19.88       |                     |                    |
| 1878        | 1888     | 666.31 | 1330.6        | 1330.6  | 0     | 0                 | 62                       | 4.82E-05          | R.QLEEAEEEAQR.A            |        |       |      |            | 4.82E-05  | R.QLEEAEEEAQR.A            |                 | 13.58       |                     |                    |
| 1899        | 1912     | 791.33 | 1580.64       | 1580.66 | -0.02 | 0                 | 79                       | 7.51E-07          | R.ELEDATEADAMNR.E          |        |       |      |            | 7.51E-07  | R.ELEDATEADAMNR.E          | Oxidation (M)   | 13.84       |                     |                    |

| accession # | coverage | score  | stinct peptid | mass    | pl    | start AA          | end AA                             | m/z obs          | M obs             | M calc | delta | miss | pept score | exp val   | peptide           | modifications | retent time | Strongest gel slice | # gel slices found |
|-------------|----------|--------|---------------|---------|-------|-------------------|------------------------------------|------------------|-------------------|--------|-------|------|------------|-----------|-------------------|---------------|-------------|---------------------|--------------------|
| O75976      | 6%       | 329    | 7             | 153919  | 5.7   | O75976 CBPD_HUMAN | Carboxypeptidase D OS=Homo sapiens | GN=CPD PE=1 SV=2 |                   |        |       |      |            |           |                   |               |             | 3                   | 1                  |
| 70          | 81       | 548.8  | 1095.58       | 1095.6  | -0.03 | 0                 | 41                                 | 0.0055232        | R.EAAAAGLPLGAR.L  |        |       |      |            | 0.0055232 | R.EAAAAGLPLGAR.L  |               | 19.84       |                     |                    |
| 559         | 571      | 487.89 | 1460.64       | 1460.68 | -0.05 | 0                 | 37                                 | 0.0135709        | K.YIGNMHGNEVVGR.E |        |       |      |            | 0.0135709 | K.YIGNMHGNEVVGR.E | Oxidation (M) | 13.02       |                     |                    |
| 614         | 625      | 624.31 | 1246.6        | 1246.62 | -0.01 | 0                 | 80                                 | 7.57E-07         | K.SQEGDSISVIGR.N  |        |       |      |            | 7.57E-07  | K.SQEGDSISVIGR.N  |               | 19.23       |                     |                    |
| 784         | 790      | 441.73 | 881.45        | 881.47  | -0.02 | 0                 | 38                                 | 0.0096366        | R.SLIQFMK.Q       |        |       |      |            | 0.0096366 | R.SLIQFMK.Q       | Oxidation (M) | 19.97       |                     |                    |
| 1018        | 1027     | 556.8  | 1111.59       | 1111.6  | -0.01 | 0                 | 63                                 | 3.41E-05         | K.NPAVTLQVLDV.R   |        |       |      |            | 3.41E-05  | K.NPAVTLQVLDV.R   |               | 19.45       |                     |                    |
| 1030        | 1041     | 640.36 | 1278.71       | 1278.73 | -0.01 | 0                 | 37                                 | 0.0140962        | R.IVIVPSLNPDPGR.E |        |       |      |            | 0.0140962 | R.IVIVPSLNPDPGR.E |               | 21.07       |                     |                    |
| 1230        | 1239     | 528.31 | 1054.61       | 1054.64 | -0.02 | 0                 | 34                                 | 0.0304641        | K.AVIVLNEGK.V     |        |       |      |            | 0.0304641 | K.AVIVLNEGK.V     |               | 20.19       |                     |                    |

| accession # | coverage | score  | stinct peptid | mass    | pl    | start AA           | end AA                                                    | m/z obs             | M obs            | M calc | delta | miss | pept score | exp val   | peptide          | modifications   | retent time | Strongest gel slice | # gel slices found |
|-------------|----------|--------|---------------|---------|-------|--------------------|-----------------------------------------------------------|---------------------|------------------|--------|-------|------|------------|-----------|------------------|-----------------|-------------|---------------------|--------------------|
| P46940      | 5%       | 374    | 9             | 189761  | 6.1   | P46940 IQGA1_HUMAN | Ras GTPase-activating-like protein IQGAP1 OS=Homo sapiens | GN=IQGAP1 PE=1 SV=1 |                  |        |       |      |            |           |                  |                 |             | 3                   | 1                  |
| 81          | 88       | 455.24 | 908.46        | 908.48  | -0.02 | 0                  | 36                                                        | 0.0165641           | K.LGNFFSPK.V     |        |       |      |            | 0.0165641 | K.LGNFFSPK.V     |                 | 20.63       |                     |                    |
| 192         | 201      | 579.29 | 1156.56       | 1156.56 | 0     | 0                  | 53                                                        | 0.0003826           | K.YGIQMFAFSK.I   |        |       |      |            | 0.0003826 | K.YGIQMFAFSK.I   | Oxidation (M)   | 19.58       |                     |                    |
| 557         | 567      | 577.34 | 1152.68       | 1152.69 | -0.01 | 0                  | 47                                                        | 0.0013791           | K.TLQALQIPAAK.L  |        |       |      |            | 0.0013791 | K.TLQALQIPAAK.L  |                 | 20.28       |                     |                    |
| 941         | 953      | 543.89 | 1628.65       | 1628.72 | -0.07 | 1                  | 36                                                        | 0.015171            | K.NKEQLSDMMINK.Q |        |       |      |            | 0.015171  | K.NKEQLSDMMINK.Q | 3 Oxidation (M) | 12.63       |                     |                    |
| 989         | 997      | 567.8  | 1133.58       | 1133.59 | -0.01 | 0                  | 37                                                        | 0.0155444           | K.LIFQMPQNK.S    |        |       |      |            | 0.0155444 | K.LIFQMPQNK.S    | Oxidation (M)   | 19.36       |                     |                    |
| 1018        | 1024     | 468.26 | 934.5         | 934.51  | -0.02 | 0                  | 35                                                        | 0.0266803           | R.EEYLLLR.L      |        |       |      |            | 0.0266803 | R.EEYLLLR.L      |                 | 21.11       |                     |                    |
| 1186        | 1194     | 562.81 | 1123.61       | 1123.64 | -0.03 | 0                  | 33                                                        | 0.0342408           | K.IIGNLLYYR.Y    |        |       |      |            | 0.0342408 | K.IIGNLLYYR.Y    |                 | 21.5        |                     |                    |
| 1466        | 1475     | 536.79 | 1071.57       | 1071.58 | -0.02 | 0                  | 47                                                        | 0.0018928           | K.LTELGTVDPK.N   |        |       |      |            | 0.0018928 | K.LTELGTVDPK.N   |                 | 17.97       |                     |                    |
| 1506        | 1516     | 618.81 | 1235.61       | 1235.65 | -0.04 | 0                  | 51                                                        | 0.0005253           | K.LQQTYAALNSK.A  |        |       |      |            | 0.0005253 | K.LQQTYAALNSK.A  |                 | 15.28       |                     |                    |

| accession # | coverage | score  | stinct peptid | mass    | pl    | start AA          | end AA                  | m/z obs           | M obs              | M calc | delta | miss | pept score | exp val   | peptide            | modifications | retent time | Strongest gel slice | # gel slices found |
|-------------|----------|--------|---------------|---------|-------|-------------------|-------------------------|-------------------|--------------------|--------|-------|------|------------|-----------|--------------------|---------------|-------------|---------------------|--------------------|
| Q9Y490      | 5%       | 600    | 11            | 271766  | 5.8   | Q9Y490 TLN1_HUMAN | Talin-1 OS=Homo sapiens | GN=TLN1 PE=1 SV=3 |                    |        |       |      |            |           |                    |               |             | 3                   | 2                  |
| 625         | 634      | 507.24 | 1012.47       | 1012.49 | -0.02 | 0                 | 37                      | 0.0151725         | R.SAQPASAEPR.Q     |        |       |      |            | 0.0151725 | R.SAQPASAEPR.Q     |               | 12.06       |                     |                    |
| 899         | 910      | 610.3  | 1218.58       | 1218.6  | -0.02 | 0                 | 60                      | 6.60E-05          | R.MATNAAAQNAIK.K   |        |       |      |            | 6.60E-05  | R.MATNAAAQNAIK.K   | Oxidation (M) | 12.76       |                     |                    |
| 1026        | 1035     | 529.29 | 1056.57       | 1056.59 | -0.02 | 0                 | 59                      | 9.99E-05          | K.NLGTALAEI.R      |        |       |      |            | 9.99E-05  | K.NLGTALAEI.R      |               | 21.24       |                     |                    |
| 1321        | 1332     | 599.32 | 1196.63       | 1196.64 | -0.01 | 0                 | 43                      | 0.0035869         | K.ALSTDPAAPNLK.S   |        |       |      |            | 0.0035869 | K.ALSTDPAAPNLK.S   |               | 17.49       |                     |                    |
| 1402        | 1415     | 717.85 | 1433.69       | 1433.72 | -0.03 | 0                 | 77                      | 1.34E-06          | K.VLGEAMTGISQNAK.N |        |       |      |            | 1.34E-06  | K.VLGEAMTGISQNAK.N | Oxidation (M) | 14.58       |                     |                    |
| 1531        | 1541     | 573.3  | 1144.59       | 1144.61 | -0.02 | 0                 | 53                      | 0.0003821         | K.EVANSTANLVK.T    |        |       |      |            | 0.0003821 | K.EVANSTANLVK.T    |               | 14.19       |                     |                    |
| 2032        | 2043     | 622.33 | 1242.64       | 1242.66 | -0.02 | 0                 | 80                      | 7.73E-07          | K.VLVQNAAGSQEK.L   |        |       |      |            | 7.73E-07  | K.VLVQNAAGSQEK.L   |               | 12.89       |                     |                    |
| 2044        | 2057     | 708.89 | 1415.76       | 1415.77 | -0.02 | 0                 | 70                      | 7.28E-06          | K.LAQAAQSSVATITR.L |        |       |      |            | 7.28E-06  | K.LAQAAQSSVATITR.L |               | 17.66       |                     |                    |
| 2090        | 2099     | 494.78 | 987.55        | 987.56  | -0.01 | 0                 | 49                      | 0.001137          | K.ALGDLISATK.A     |        |       |      |            | 0.001137  | K.ALGDLISATK.A     |               | 20.67       |                     |                    |
| 2169        | 2177     | 533.26 | 1064.5        | 1064.51 | -0.02 | 0                 | 42                      | 0.0041534         | K.TSTPDFIR.M       |        |       |      |            | 0.0041534 | K.TSTPDFIR.M       |               | 20.02       |                     |                    |
| 2351        | 2361     | 516.3  | 1030.59       | 1030.6  | -0.01 | 0                 | 33                      | 0.0425371         | K.SIAAATSALVK.A    |        |       |      |            | 0.0425371 | K.SIAAATSALVK.A    |               | 19.71       |                     |                    |

| accession # | coverage | score  | stinct peptid | mass    | pl    | start AA          | end AA                                   | m/z obs            | M obs         | M calc | delta | miss | pept score | exp val   | peptide       | modifications | retent time | Strongest gel slice | # gel slices found |
|-------------|----------|--------|---------------|---------|-------|-------------------|------------------------------------------|--------------------|---------------|--------|-------|------|------------|-----------|---------------|---------------|-------------|---------------------|--------------------|
| P08575      | 2%       | 131    | 3             | 148644  | 5.8   | P08575 CD45_HUMAN | Leukocyte common antigen OS=Homo sapiens | GN=PTPRC PE=1 SV=2 |               |        |       |      |            |           |               |               |             | 3                   | 1                  |
| 315         | 322      | 461.22 | 920.43        | 920.46  | -0.03 | 0                 | 39                                       | 0.0091323          | K.ADTTICKL.W  |        |       |      |            | 0.0091323 | K.ADTTICKL.W  |               | 15.67       |                     |                    |
| 1055        | 1063     | 531.31 | 1060.6        | 1060.62 | -0.02 | 0                 | 47                                       | 0.001456           | K.VIVMLTELK.H |        |       |      |            | 0.001456  | K.VIVMLTELK.H | Oxidation (M) | 20.8        |                     |                    |

| accession # | coverage | score | stinct peptid | mass   | pl  | start AA           | end AA                                      | m/z obs   | M obs   | M calc  | delta   | miss  | pept score | exp val   | peptide                            | modifications   | retent time | Strongest gel slice | # gel slices found |
|-------------|----------|-------|---------------|--------|-----|--------------------|---------------------------------------------|-----------|---------|---------|---------|-------|------------|-----------|------------------------------------|-----------------|-------------|---------------------|--------------------|
|             |          |       |               |        |     | 1134               | 1143                                        | 588.33    | 1174.65 | 1174.66 | -0.01   | 0     | 45         | 0.0025735 | K.ELISMIQVVK.Q                     | Oxidation (M)   |             | 20.5                |                    |
| P15144      | 21%      | 1099  | 20            | 109870 | 5.3 | P15144 AMPN_HUMAN  | Amino                                       | 76 86     | 435.22  | 1302.65 | 1302.69 | -0.04 | 0          | 33        | 0.0361554 R.LPNTLKPDSYR.V          |                 | 16.09       | 4                   | 3                  |
|             |          |       |               |        |     |                    |                                             | 87 98     | 482.26  | 1443.75 | 1443.78 | -0.04 | 0          | 39        | 0.0089273 R.VTLRPYLTPNDR.G         |                 | 19.65       |                     |                    |
|             |          |       |               |        |     |                    |                                             | 205 218   | 502.58  | 1504.72 | 1504.77 | -0.05 | 1          | 52        | 0.0003909 R.KVVATTQMQAADAR.K       | Oxidation (M)   | 12.1        |                     |                    |
|             |          |       |               |        |     |                    |                                             | 205 219   | 545.27  | 1632.79 | 1632.86 | -0.07 | 2          | 66        | 1.54E-05 R.KVVATTQMQAADAR.K.S      | Oxidation (M)   | 11.92       |                     |                    |
|             |          |       |               |        |     |                    |                                             | 206 218   | 689.33  | 1376.65 | 1376.67 | -0.02 | 0          | 112       | 4.22E-10 K.VVATTQMQAADAR.K         | Oxidation (M)   | 12.44       |                     |                    |
|             |          |       |               |        |     |                    |                                             | 220 230   | 672.77  | 1343.53 | 1343.55 | -0.02 | 0          | 44        | 0.0026887 K.SFPQDFEPAMK.A          | Oxidation (M)   | 20.65       |                     |                    |
|             |          |       |               |        |     |                    |                                             | 242 252   | 609.81  | 1217.6  | 1217.63 | -0.03 | 0          | 38        | 0.0129724 K.DLTALSNMLPK.G          | Oxidation (M)   | 21.18       |                     |                    |
|             |          |       |               |        |     |                    |                                             | 293 301   | 479.27  | 956.53  | 956.54  | -0.01 | 0          | 65        | 2.32E-05 K.QASNGVLI.R              |                 | 14.44       |                     |                    |
|             |          |       |               |        |     |                    |                                             | 364 379   | 862.91  | 1723.81 | 1723.83 | -0.02 | 0          | 84        | 2.39E-07 R.ENSLFDFPLSSSSSNK.E      |                 | 22.09       |                     |                    |
|             |          |       |               |        |     |                    |                                             | 364 381   | 670.64  | 2008.9  | 2008.97 | -0.07 | 1          | 53        | 0.000263 R.ENSLFDFPLSSSSSNKER.V    |                 | 21.31       |                     |                    |
|             |          |       |               |        |     |                    |                                             | 433 442   | 627.31  | 1252.6  | 1252.61 | -0.01 | 0          | 42        | 0.0043405 K.DLMVLDNDVYR.V          | Oxidation (M)   | 21.48       |                     |                    |
|             |          |       |               |        |     |                    |                                             | 486 497   | 709.83  | 1417.65 | 1417.68 | -0.03 | 0          | 61        | 5.93E-05 R.MLSSFLSSEDFVK.Q         | Oxidation (M)   | 22.7        |                     |                    |
|             |          |       |               |        |     |                    |                                             | 596 606   | 732.37  | 1462.73 | 1462.72 | 0.01  | 0          | 44        | 0.0030039 R.QQQDYWLIDVR.A          |                 | 22.27       |                     |                    |
|             |          |       |               |        |     |                    |                                             | 659 673   | 538.26  | 1611.75 | 1611.84 | -0.09 | 0          | 55        | 0.0002009 R.AQIINDAFNLASA.HK.V     |                 | 21.05       |                     |                    |
|             |          |       |               |        |     |                    |                                             | 778 793   | 663.97  | 1988.89 | 1988.93 | -0.03 | 0          | 38        | 0.0083893 K.QWMENPNNNPIHPNLR.S     | Oxidation (M)   | 19.47       |                     |                    |
|             |          |       |               |        |     |                    |                                             | 837 843   | 472.27  | 942.53  | 942.53  | 0     | 0          | 43        | 0.0039926 K.ELWLINR.V              |                 | 22.18       |                     |                    |
|             |          |       |               |        |     |                    |                                             | 844 855   | 734.38  | 1466.75 | 1466.78 | -0.03 | 0          | 65        | 2.16E-05 R.YLSTYLNPLDIR.K          |                 | 21.92       |                     |                    |
|             |          |       |               |        |     |                    |                                             | 924 935   | 635.26  | 1268.51 | 1268.53 | -0.02 | 0          | 73        | 3.52E-06 K.DNEETGFGSGTR.A          |                 | 13.96       |                     |                    |
|             |          |       |               |        |     |                    |                                             | 936 943   | 451.24  | 900.46  | 900.49  | -0.03 | 0          | 51        | 0.0007131 R.ALEQALEK.T             |                 | 14.83       |                     |                    |
|             |          |       |               |        |     |                    |                                             | 956 967   | 740.43  | 1478.85 | 1478.74 | 0.11  | 0          | 42        | 0.004676 K.EVVLQWFTENSK.-          |                 | 22.92       |                     |                    |
| Q92896      | 20%      | 1252  | 24            | 138382 | 6.5 | Q92896 GSLG1_HUMAN | Golgi apparatus protein 1                   | 112 124   | 531.9   | 1592.67 | 1592.71 | -0.04 | 1          | 45        | 0.0019677 K.LAAEESCREVDVTR.V       |                 | 12.83       | 4                   | 2                  |
|             |          |       |               |        |     |                    |                                             | 182 197   | 592.95  | 1775.83 | 1775.86 | -0.03 | 1          | 52        | 0.0004165 K.STITEIKECADEPVGK.G     |                 | 19.34       |                     |                    |
|             |          |       |               |        |     |                    |                                             | 198 208   | 451.53  | 1351.58 | 1351.6  | -0.02 | 0          | 37        | 0.0129894 K.GYMVSVCLVDHR.G         | Oxidation (M)   | 19.51       |                     |                    |
|             |          |       |               |        |     |                    |                                             | 223 232   | 616.79  | 1231.57 | 1231.59 | -0.03 | 0          | 70        | 8.53E-06 K.MTAIFSDYR.L             | Oxidation (M)   | 20.96       |                     |                    |
|             |          |       |               |        |     |                    |                                             | 298 310   | 501.89  | 1502.65 | 1502.7  | -0.05 | 0          | 42        | 0.0039018 R.VAELSSDDFHLD.R.H       |                 | 20.26       |                     |                    |
|             |          |       |               |        |     |                    |                                             | 323 333   | 634.77  | 1267.52 | 1267.53 | 0     | 0          | 69        | 8.85E-06 R.FCENQAGEGR.V            |                 | 12.66       |                     |                    |
|             |          |       |               |        |     |                    |                                             | 359 367   | 369.54  | 1105.59 | 1105.61 | -0.03 | 1          | 41        | 0.0057837 R.QKLIADQYK.V            |                 | 13.31       |                     |                    |
|             |          |       |               |        |     |                    |                                             | 361 367   | 425.73  | 849.44  | 849.46  | -0.02 | 0          | 34        | 0.0333036 K.LIAQDYK.V              |                 | 13.83       |                     |                    |
|             |          |       |               |        |     |                    |                                             | 385 392   | 501.24  | 1000.46 | 1000.48 | -0.02 | 0          | 39        | 0.0110718 R.CNVENLPR.S             |                 | 14.31       |                     |                    |
|             |          |       |               |        |     |                    |                                             | 414 427   | 859.35  | 1716.68 | 1716.71 | -0.02 | 0          | 48        | 0.0009477 R.QVSSCECGEMLDYR.R       | Oxidation (M)   | 16          |                     |                    |
|             |          |       |               |        |     |                    |                                             | 414 428   | 625.29  | 1872.84 | 1872.81 | 0.03  | 1          | 37        | 0.0139598 R.QVSSCECGEMLDYR.M       | Oxidation (M)   | 14.01       |                     |                    |
|             |          |       |               |        |     |                    |                                             | 502 516   | 847.37  | 1692.73 | 1692.78 | -0.05 | 0          | 88        | 1.01E-07 R.ALNEACESVIQTACK.H       |                 | 19.73       |                     |                    |
|             |          |       |               |        |     |                    |                                             | 546 555   | 641.34  | 1280.67 | 1280.71 | -0.05 | 0          | 39        | 0.0090137 R.LLELYFISR.D            |                 | 23.45       |                     |                    |
|             |          |       |               |        |     |                    |                                             | 631 638   | 450.23  | 898.45  | 898.48  | -0.03 | 0          | 32        | 0.0400183 K.LDPALQDK.C             |                 | 13.79       |                     |                    |
|             |          |       |               |        |     |                    |                                             | 639 645   | 409.72  | 817.42  | 817.44  | -0.02 | 0          | 39        | 0.0113474 K.CLIDLGK.W              |                 | 20.48       |                     |                    |
|             |          |       |               |        |     |                    |                                             | 734 747   | 549.94  | 1646.79 | 1646.83 | -0.04 | 0          | 36        | 0.0152457 K.CAIGVTHFOLVQMK.D       | Oxidation (M)   | 20.17       |                     |                    |
|             |          |       |               |        |     |                    |                                             | 807 817   | 690.32  | 1378.62 | 1378.63 | 0     | 0          | 79        | 8.11E-07 R.VEELEMTDIR.L            | Oxidation (M)   | 19.21       |                     |                    |
|             |          |       |               |        |     |                    |                                             | 909 916   | 475.21  | 948.4   | 948.42  | -0.02 | 0          | 42        | 0.004966 K.NSELMDFK.C              | Oxidation (M)   | 12.57       |                     |                    |
|             |          |       |               |        |     |                    |                                             | 925 933   | 569.77  | 1137.53 | 1137.54 | -0.01 | 0          | 53        | 0.0003406 R.QITQNTDYR.L            |                 | 12.97       |                     |                    |
|             |          |       |               |        |     |                    |                                             | 980 989   | 611.76  | 1221.51 | 1221.53 | -0.02 | 0          | 77        | 1.36E-06 R.LSSDCEQDIR.I            |                 | 13.49       |                     |                    |
|             |          |       |               |        |     |                    |                                             | 990 1000  | 660.85  | 1319.68 | 1319.71 | -0.03 | 0          | 76        | 1.68E-06 R.IIQESALDYR.L            |                 | 20.74       |                     |                    |
|             |          |       |               |        |     |                    |                                             | 1077 1086 | 373.84  | 1118.5  | 1118.54 | -0.04 | 0          | 36        | 0.0201925 K.HHCAITPGR.G            |                 | 11.97       |                     |                    |
|             |          |       |               |        |     |                    |                                             | 1089 1100 | 743.82  | 1485.62 | 1485.61 | 0     | 0          | 57        | 0.0001408 R.QMSCLMEALDK.R          | 2 Oxidation (M) | 19.95       |                     |                    |
|             |          |       |               |        |     |                    |                                             | 1089 1101 | 548.24  | 1641.69 | 1641.72 | -0.03 | 1          | 58        | 0.0001093 R.QMSCLMEALDKR.V         | 2 Oxidation (M) | 19.16       |                     |                    |
| P13473      | 4%       | 73    | 2             | 45503  | 5.3 | P13473 LAMP2_HUMAN | Lysosome-associated membrane glycoprotein 2 | 145 152   | 494.27  | 986.53  | 986.55  | -0.03 | 0          | 41        | 0.0062376 R.IPLNDFR.C              |                 | 22.05       | 4                   | 3                  |
|             |          |       |               |        |     |                    |                                             | 281 289   | 551.29  | 1100.57 | 1100.59 | -0.02 | 0          | 32        | 0.0496596 K.YLDFVFAVK.N            |                 | 23.23       |                     |                    |
| Q9Y4L1      | 2%       | 89    | 2             | 111494 | 5.2 | Q9Y4L1 HYOU1_HUMAN | Hypoxia up-regulated protein 1              | 269 278   | 567.78  | 1133.55 | 1133.58 | -0.02 | 0          | 52        | 0.0004271 R.TLGGLEMLR.L            | Oxidation (M)   | 20.57       | 4                   | 2                  |
|             |          |       |               |        |     |                    |                                             | 283 291   | 524.27  | 1046.53 | 1046.55 | -0.02 | 0          | 37        | 0.0183066 R.LAGLFNEQR.K            |                 | 20.52       |                     |                    |
| P11279      | 14%      | 403   | 6             | 45367  | 9   | P11279 LAMP1_HUMAN | Lysosome-associated membrane glycoprotein 1 | 138 146   | 517.27  | 1032.53 | 1032.55 | -0.01 | 0          | 72        | 5.33E-06 K.TVESITDIR.A             |                 | 19.18       | 5                   | 6                  |
|             |          |       |               |        |     |                    |                                             | 299 314   | 923.5   | 1844.99 | 1845.01 | -0.02 | 0          | 114       | 2.54E-10 R.FFLQGILNLTLPDAR.D       |                 | 23.12       |                     |                    |
|             |          |       |               |        |     |                    |                                             | 299 319   | 802.09  | 2403.23 | 2403.3  | -0.06 | 1          | 46        | 0.0011556 R.FFLQGILNLTLPDARDPAFK.A |                 | 22.77       |                     |                    |
|             |          |       |               |        |     |                    |                                             | 327 337   | 576.3   | 1150.58 | 1150.6  | -0.02 | 0          | 83        | 3.78E-07 R.ALQATVGNYSYK.C          |                 | 13.83       |                     |                    |
|             |          |       |               |        |     |                    |                                             | 349 356   | 463.25  | 924.49  | 924.51  | -0.02 | 0          | 43        | 0.0032748 K.AFSVNIKF.V             |                 | 20.92       |                     |                    |
|             |          |       |               |        |     |                    |                                             | 410 417   | 438.7   | 875.39  | 875.41  | -0.02 | 0          | 46        | 0.002015 R.SHAGYQTI.-              |                 | 13.52       |                     |                    |
| Q13740      | 9%       | 166   | 4             | 65745  | 5.9 | Q13740 CD166_HUMAN | CD166 antigen                               | 77 89     | 538.58  | 1612.71 | 1612.74 | -0.03 | 1          | 39        | 0.0076692 K.SVQYDDVPEYKDR.L        |                 | 17.09       | 5                   | 1                  |
|             |          |       |               |        |     |                    |                                             | 143 152   | 596.33  | 1190.64 | 1190.65 | -0.01 | 0          | 35        | 0.026833 K.ALFFLETEQLK.K           |                 | 20.65       |                     |                    |
|             |          |       |               |        |     |                    |                                             | 294 305   | 471.56  | 1411.67 | 1411.71 | -0.03 | 1          | 39        | 0.008849 R.SSNYTLTDVRR.N           |                 | 14.96       |                     |                    |
|             |          |       |               |        |     |                    |                                             | 345 360   | 837.92  | 1673.82 | 1673.84 | -0.02 | 0          | 53        | 0.000305 R.QIGDALPVCSITISASR.N     |                 | 20.03       |                     |                    |
| accession # | coverage | score | stinct peptid | mass   | pl  | start AA           | end AA                                      | m/z obs   | M obs   | M calc  | delta   | miss  | pept score | exp val   | peptide                            | modifications   | retent time | Strongest gel slice | # gel slices found |



| accession # | coverage | score | stinct peptid | mass   | pl  | start AA            | end AA                                                                          | m/z obs | M obs | M calc | delta   | miss    | pept score | exp val | peptide | modifications                      | retent time     | Strongest gel slice | # gel slices found |   |
|-------------|----------|-------|---------------|--------|-----|---------------------|---------------------------------------------------------------------------------|---------|-------|--------|---------|---------|------------|---------|---------|------------------------------------|-----------------|---------------------|--------------------|---|
| P16284      | 8%       | 197   | 4             | 83396  | 6.5 | P16284 PECA1_HUMAN  | Platelet endothelial cell adhesion molecule OS=Homo sapiens GN=PECAM1 PE=1 SV=1 | 90      | 100   | 664.32 | 1326.62 | 1326.65 | -0.02      | 0       | 55      | 0.0002005 K.STESYFIPFV.R.I         |                 | 20.56               | 5                  | 1 |
|             |          |       |               |        |     |                     |                                                                                 | 210     | 223   | 516.58 | 1546.73 | 1546.77 | -0.04      | 0       | 46      | 0.0015155 R.IISGHHMOTSESTK.S       | Oxidation (M)   | 12.73               |                    |   |
|             |          |       |               |        |     |                     |                                                                                 | 496     | 511   | 849.47 | 1696.92 | 1696.96 | -0.04      | 0       | 57      | 0.0001219 K.VIAPVDEVOISILSSK.V     |                 | 21.54               |                    |   |
|             |          |       |               |        |     |                     |                                                                                 | 632     | 651   | 762.71 | 2285.09 | 2285.11 | -0.02      | 0       | 38      | 0.0087543 K.QMPVEMSRPAVPLLSNNNEK.M | 2 Oxidation (M) | 19.13               |                    |   |
| accession # | coverage | score | stinct peptid | mass   | pl  | start AA            | end AA                                                                          | m/z obs | M obs | M calc | delta   | miss    | pept score | exp val | peptide | modifications                      | retent time     | Strongest gel slice | # gel slices found |   |
| P05556      | 7%       | 218   | 5             | 91714  | 5.3 | P05556 ITB1_HUMAN   | Integrin beta-1 OS=Homo sapiens GN=ITGB1 PE=1 SV=1                              | 125     | 134   | 554.29 | 1106.56 | 1106.56 | 0          | 0       | 44      | 0.0031939 R.SGPEQTFTLK.F           |                 | 19                  | 5                  | 2 |
|             |          |       |               |        |     |                     |                                                                                 | 164     | 174   | 649.79 | 1297.57 | 1297.56 | 0          | 0       | 51      | 0.0006185 K.SLGGTDLNMEMR.R         | 2 Oxidation (M) | 16.91               |                    |   |
|             |          |       |               |        |     |                     |                                                                                 | 182     | 190   | 492.25 | 982.48  | 982.51  | -0.03      | 0       | 32      | 0.0458922 R.IGFGSFVEK.T            |                 | 20.52               |                    |   |
|             |          |       |               |        |     |                     |                                                                                 | 191     | 202   | 662.83 | 1323.65 | 1323.67 | -0.02      | 0       | 47      | 0.0013208 K.TVMPYISITTPAK.L        | Oxidation (M)   | 16.48               |                    |   |
|             |          |       |               |        |     |                     |                                                                                 | 563     | 575   | 668.3  | 1334.59 | 1334.61 | -0.02      | 0       | 45      | 0.0022155 R.SNGLICGGNGVCK.C        |                 | 14.65               |                    |   |
| accession # | coverage | score | stinct peptid | mass   | pl  | start AA            | end AA                                                                          | m/z obs | M obs | M calc | delta   | miss    | pept score | exp val | peptide | modifications                      | retent time     | Strongest gel slice | # gel slices found |   |
| Q16706      | 6%       | 346   | 6             | 131742 | 7.2 | Q16706 MAN2A1_HUMAN | Alpha-mannosidase 2 OS=Homo sapiens GN=MAN2A1 PE=1 SV=2                         | 61      | 73    | 749.91 | 1497.8  | 1497.82 | -0.01      | 0       | 91      | 4.80E-08 R.LLAEINNEISNIR.D         |                 | 20.21               | 5                  | 1 |
|             |          |       |               |        |     |                     |                                                                                 | 418     | 428   | 608.34 | 1214.66 | 1214.67 | 0          | 0       | 46      | 0.00213 K.VLLAPLGGDFR.Y            |                 | 21.41               |                    |   |
|             |          |       |               |        |     |                     |                                                                                 | 547     | 560   | 779.9  | 1557.78 | 1557.8  | -0.03      | 0       | 69      | 7.88E-06 K.FLSSSLYALTALTEAR.R      |                 | 21.72               |                    |   |
|             |          |       |               |        |     |                     |                                                                                 | 769     | 776   | 478.22 | 954.43  | 954.45  | -0.02      | 0       | 37      | 0.0119282 R.FDQGTGLMK.Q            | Oxidation (M)   | 13.56               |                    |   |
|             |          |       |               |        |     |                     |                                                                                 | 965     | 974   | 551.27 | 1100.53 | 1100.55 | -0.02      | 0       | 53      | 0.0003784 R.GLEQGIQDNK.I           |                 | 13.61               |                    |   |
|             |          |       |               |        |     |                     |                                                                                 | 1083    | 1094  | 628.8  | 1255.58 | 1255.59 | -0.01      | 0       | 51      | 0.0006561 K.GTGLFCSTTQGGK.I        |                 | 17.52               |                    |   |
| accession # | coverage | score | stinct peptid | mass   | pl  | start AA            | end AA                                                                          | m/z obs | M obs | M calc | delta   | miss    | pept score | exp val | peptide | modifications                      | retent time     | Strongest gel slice | # gel slices found |   |
| P53396      | 6%       | 265   | 5             | 121674 | 7   | P53396 ACLY_HUMAN   | ATP-citrate synthase OS=Homo sapiens GN=ACLY PE=1 SV=3                          | 18      | 28    | 655.83 | 1309.65 | 1309.64 | 0          | 0       | 61      | 5.34E-05 K.FICTTSAIQNR.F           |                 | 17.82               | 5                  | 1 |
|             |          |       |               |        |     |                     |                                                                                 | 593     | 607   | 784.47 | 1566.93 | 1566.9  | 0.03       | 0       | 47      | 0.0013371 R.TIAIAEGIPALTR.K        |                 | 21.9                |                    |   |
|             |          |       |               |        |     |                     |                                                                                 | 636     | 650   | 760.39 | 1518.76 | 1518.77 | -0.01      | 0       | 77      | 1.23E-06 K.IGNTGGMLDNLASK.L        | Oxidation (M)   | 20.12               |                    |   |
|             |          |       |               |        |     |                     |                                                                                 | 663     | 676   | 754.35 | 1506.69 | 1506.71 | -0.02      | 0       | 40      | 0.0066007 R.SGGMSNLENNIISR.T       | Oxidation (M)   | 19.71               |                    |   |
|             |          |       |               |        |     |                     |                                                                                 | 935     | 944   | 460.74 | 919.46  | 919.48  | -0.02      | 0       | 43      | 0.0037716 R.FGGALDAAAK.M           |                 | 15.57               |                    |   |
| accession # | coverage | score | stinct peptid | mass   | pl  | start AA            | end AA                                                                          | m/z obs | M obs | M calc | delta   | miss    | pept score | exp val | peptide | modifications                      | retent time     | Strongest gel slice | # gel slices found |   |
| O00461      | 4%       | 97    | 2             | 81888  | 4.7 | O00461 GOL4_HUMAN   | integral membrane protein 4 OS=Homo sapiens GN=GOL4 PE=1 SV=1                   | 157     | 170   | 588.64 | 1762.91 | 1762.91 | 0          | 1       | 34      | 0.0235443 K.YLQLQQEKEQELSK.L       |                 | 17.69               | 5                  | 1 |
|             |          |       |               |        |     |                     |                                                                                 | 416     | 428   | 756.4  | 1510.78 | 1510.81 | -0.03      | 0       | 63      | 3.37E-05 R.LAVQQVEEAQQLR.E         |                 | 19.45               |                    |   |
| accession # | coverage | score | stinct peptid | mass   | pl  | start AA            | end AA                                                                          | m/z obs | M obs | M calc | delta   | miss    | pept score | exp val | peptide | modifications                      | retent time     | Strongest gel slice | # gel slices found |   |
| Q92542      | 3%       | 113   | 2             | 79103  | 5.7 | Q92542 NICA_HUMAN   | Nicatin OS=Homo sapiens GN=NCSTN PE=1 SV=2                                      | 392     | 403   | 686.86 | 1371.71 | 1371.72 | -0.02      | 0       | 56      | 0.0001705 R.NQVEDLLATLEK.S         |                 | 22.73               | 5                  | 2 |
|             |          |       |               |        |     |                     |                                                                                 | 486     | 496   | 543.31 | 1084.6  | 1084.62 | -0.02      | 0       | 57      | 0.0001608 K.ALADAVATVLR.A          |                 | 20.74               |                    |   |
| accession # | coverage | score | stinct peptid | mass   | pl  | start AA            | end AA                                                                          | m/z obs | M obs | M calc | delta   | miss    | pept score | exp val | peptide | modifications                      | retent time     | Strongest gel slice | # gel slices found |   |
| O94804      | 3%       | 85    | 2             | 112749 | 6.5 | O94804 STK10_HUMAN  | Serine/threonine-protein kinase 10 OS=Homo sapiens GN=STK10 PE=1 SV=1           | 160     | 172   | 702.85 | 1403.69 | 1403.71 | -0.02      | 0       | 35      | 0.024355 K.AGNVMTLEGDIR.L          | Oxidation (M)   | 21.63               | 5                  | 1 |
|             |          |       |               |        |     |                     |                                                                                 | 447     | 464   | 611.28 | 1830.82 | 1830.91 | -0.08      | 0       | 51      | 0.0004792 K.ASQSRPNSSALETLGGEK.L   |                 | 16                  |                    |   |
| accession # | coverage | score | stinct peptid | mass   | pl  | start AA            | end AA                                                                          | m/z obs | M obs | M calc | delta   | miss    | pept score | exp val | peptide | modifications                      | retent time     | Strongest gel slice | # gel slices found |   |
| P18206      | 2%       | 128   | 2             | 124292 | 5.5 | P18206 VINC_HUMAN   | Vinculin OS=Homo sapiens GN=VCL PE=1 SV=4                                       | 327     | 339   | 755.35 | 1508.69 | 1508.7  | -0.01      | 0       | 73      | 3.77E-06 K.MLGGQMTDQVADLR.A        | 2 Oxidation (M) | 19.05               | 5                  | 1 |
|             |          |       |               |        |     |                     |                                                                                 | 803     | 815   | 635.33 | 1268.65 | 1268.67 | -0.02      | 0       | 56      | 0.0001845 K.AVAGNISDPGLQK.S        |                 | 15.4                |                    |   |
| accession # | coverage | score | stinct peptid | mass   | pl  | start AA            | end AA                                                                          | m/z obs | M obs | M calc | delta   | miss    | pept score | exp val | peptide | modifications                      | retent time     | Strongest gel slice | # gel slices found |   |
| P14625      | 19%      | 766   | 14            | 92696  | 4.8 | P14625 ENPL_HUMAN   | Endoplasmic reticulum protein OS=Homo sapiens GN=HSP90B1 PE=1 SV=1              | 44      | 51    | 481.22 | 960.42  | 960.45  | -0.03      | 0       | 49      | 0.0010703 R.TDDEVVQR.E             |                 | 12.55               | 6                  | 3 |
|             |          |       |               |        |     |                     |                                                                                 | 76      | 84    | 541.25 | 1080.49 | 1080.54 | -0.04      | 0       | 46      | 0.0015082 K.FAFQAEVNR.M            |                 | 19.68               |                    |   |
|             |          |       |               |        |     |                     |                                                                                 | 103     | 114   | 638.31 | 1274.6  | 1274.64 | -0.03      | 0       | 64      | 3.18E-05 R.ELISNASDALDK.I          |                 | 19.46               |                    |   |
|             |          |       |               |        |     |                     |                                                                                 | 143     | 156   | 510.57 | 1528.7  | 1528.77 | -0.07      | 0       | 62      | 4.64E-05 K.NLLHVTDTGVGMTR.E        | Oxidation (M)   | 19.02               |                    |   |
|             |          |       |               |        |     |                     |                                                                                 | 169     | 177   | 491.73 | 981.44  | 981.48  | -0.03      | 0       | 49      | 0.0007608 K.SGTSEFLNK.M            |                 | 14.95               |                    |   |
|             |          |       |               |        |     |                     |                                                                                 | 286     | 300   | 869.35 | 1736.69 | 1736.73 | -0.04      | 0       | 43      | 0.0027818 K.TETVEEPMEEEEAAK.E      | Oxidation (M)   | 13.77               |                    |   |
|             |          |       |               |        |     |                     |                                                                                 | 385     | 395   | 594.33 | 1186.64 | 1186.67 | -0.03      | 0       | 45      | 0.0024251 K.SILFVPTSAPR.G          |                 | 20.65               |                    |   |
|             |          |       |               |        |     |                     |                                                                                 | 396     | 404   | 508.22 | 1014.43 | 1014.47 | -0.04      | 0       | 34      | 0.0387929 R.GLFDYGSK.K             |                 | 20.3                |                    |   |
|             |          |       |               |        |     |                     |                                                                                 | 435     | 448   | 743.36 | 1484.7  | 1484.75 | -0.05      | 0       | 92      | 3.93E-08 K.GVVDSDLLPLNVSR.E        |                 | 20.34               |                    |   |
|             |          |       |               |        |     |                     |                                                                                 | 538     | 546   | 524.23 | 1046.45 | 1046.49 | -0.04      | 0       | 44      | 0.0035044 K.IYFMAGSSR.K            | Oxidation (M)   | 16.88               |                    |   |
|             |          |       |               |        |     |                     |                                                                                 | 548     | 557   | 575.75 | 1149.48 | 1149.53 | -0.05      | 0       | 61      | 5.21E-05 K.EAESSPFVER.L            |                 | 15.86               |                    |   |
|             |          |       |               |        |     |                     |                                                                                 | 672     | 682   | 645.28 | 1288.55 | 1288.59 | -0.04      | 0       | 50      | 0.0007949 K.DISTNYVASQK.K          |                 | 16.64               |                    |   |
|             |          |       |               |        |     |                     |                                                                                 | 725     | 733   | 497.25 | 992.48  | 992.52  | -0.04      | 0       | 52      | 0.0004279 R.SGYLLPDTK.A            |                 | 19.41               |                    |   |
|             |          |       |               |        |     |                     |                                                                                 | 745     | 754   | 543.28 | 1084.54 | 1084.58 | -0.04      | 0       | 49      | 0.0009912 R.LSLNIDPDAK.V           |                 | 20.03               |                    |   |
| accession # | coverage | score | stinct peptid | mass   | pl  | start AA            | end AA                                                                          | m/z obs | M obs | M calc | delta   | miss    | pept score | exp val | peptide | modifications                      | retent time     | Strongest gel slice | # gel slices found |   |
| P12814      | 13%      | 599   | 11            | 103563 | 5.3 | P12814 ACTN1_HUMAN  | Alpha-actinin-1 OS=Homo sapiens GN=ACTN1 PE=1 SV=2                              | 22      | 31    | 600.3  | 1198.59 | 1198.62 | -0.03      | 0       | 38      | 0.012258 R.DLLLDPAWEK.Q            |                 | 21.88               | 6                  | 1 |
|             |          |       |               |        |     |                     |                                                                                 | 96      | 103   | 432.73 | 863.45  | 863.48  | -0.03      | 0       | 39      | 0.0099479 K.ALDFIAASK.G            |                 | 19.95               |                    |   |
|             |          |       |               |        |     |                     |                                                                                 | 134     | 147   | 769.36 | 1536.71 | 1536.77 | -0.05      | 0       | 80      | 6.68E-07 R.FAIDISVETSASK.E         |                 | 20.48               |                    |   |
|             |          |       |               |        |     |                     |                                                                                 | 186     | 195   | 409.86 | 1226.56 | 1226.64 | -0.08      | 0       | 55      | 0.0002045 R.HRPELIDYGK.L           |                 | 13.95               |                    |   |
|             |          |       |               |        |     |                     |                                                                                 | 215     | 220   | 374.7  | 747.38  | 747.42  | -0.04      | 0       | 40      | 0.0100331 K.YLDIPK.M               |                 | 19.2                |                    |   |
|             |          |       |               |        |     |                     |                                                                                 | 347     | 359   | 493.22 | 1476.64 | 1476.71 | -0.07      | 0       | 47      | 0.0015629 R.LSNRPAFMPSEGR.M        | Oxidation (M)   | 13.47               |                    |   |
|             |          |       |               |        |     |                     |                                                                                 | 419     | 431   | 509.24 | 1524.71 | 1524.77 | -0.06      | 1       | 37      | 0.0135138 R.QKDYETATLSIEM.A        |                 | 19.15               |                    |   |
|             |          |       |               |        |     |                     |                                                                                 | 727     | 738   | 715.36 | 1428.71 | 1428.76 | -0.04      | 0       | 70      | 6.66E-06 R.TINEVENQILTR.D          |                 | 20.17               |                    |   |
|             |          |       |               |        |     |                     |                                                                                 | 742     | 752   | 677.79 | 1353.56 | 1353.6  | -0.03      | 0       | 70      | 6.32E-06 K.GISQEQMNEFR.A           | Oxidation (M)   | 14.47               |                    |   |

| accession # | coverage | score | stinct peptid | mass   | pl  | start AA           | end AA                                      | m/z obs         | M obs       | M calc  | delta | miss | pept score | exp val   | peptide                      | modifications   | retent time | Strongest gel slice | # gel slices found |
|-------------|----------|-------|---------------|--------|-----|--------------------|---------------------------------------------|-----------------|-------------|---------|-------|------|------------|-----------|------------------------------|-----------------|-------------|---------------------|--------------------|
|             |          |       |               |        |     | 795                | 803                                         | 530.76          | 1059.51     | 1059.54 | -0.03 | 0    | 44         | 0.0033654 | R.IMSIVDPNR.L                | Oxidation (M)   | 15.38       |                     |                    |
|             |          |       |               |        |     | 851                | 863                                         | 781.35          | 1560.68     | 1560.72 | -0.05 | 0    | 49         | 0.0007827 | R.ELPPDQAEYCIAR.M            |                 | 19.55       |                     |                    |
| P05107      | 8%       | 247   | 6             | 87976  | 6.7 | P05107 ITB2_HUMAN  | Integrin beta-2                             | OS=Homo sapiens | GN=ITGB2    | PE=1    | SV=2  |      |            |           |                              | modifications   | retent time | Strongest gel slice | # gel slices found |
|             |          |       |               |        |     | 156                | 165                                         | 545.26          | 1088.5      | 1088.55 | -0.04 | 0    | 37         | 0.0155778 | R.ALNEITESGR.I               |                 | 14.42       | 6                   | 7                  |
|             |          |       |               |        |     | 166                | 174                                         | 485.24          | 968.46      | 968.5   | -0.04 | 0    | 40         | 0.0062148 | R.IGFGSFVDK.T                |                 | 20.7        |                     |                    |
|             |          |       |               |        |     | 275                | 285                                         | 563.79          | 1125.57     | 1125.61 | -0.04 | 0    | 38         | 0.0100212 | K.LGAILTPNDGR.C              |                 | 19.37       |                     |                    |
|             |          |       |               |        |     | 311                | 325                                         | 836.92          | 1671.83     | 1671.89 | -0.06 | 0    | 45         | 0.0023148 | K.LAENNIQPIFAVTSR.M          |                 | 20.96       |                     |                    |
|             |          |       |               |        |     | 578                | 586                                         | 524.23          | 1046.45     | 1046.48 | -0.03 | 0    | 52         | 0.000549  | R.TTEGCLNPR.R                |                 | 12.77       |                     |                    |
|             |          |       |               |        |     | 625                | 633                                         | 572.24          | 1142.47     | 1142.51 | -0.04 | 0    | 35         | 0.0252061 | K.YISCAECLK.F                |                 | 15.25       |                     |                    |
| O43707      | 8%       | 420   | 7             | 105245 | 5.3 | O43707 ACTN4_HUMAN | Alpha-actinin-4                             | OS=Homo sapiens | GN=ACTN4    | PE=1    | SV=2  |      |            |           |                              | modifications   | retent time | Strongest gel slice | # gel slices found |
|             |          |       |               |        |     | 41                 | 50                                          | 600.3           | 1198.59     | 1198.62 | -0.03 | 0    | 38         | 0.012258  | R.DLLLDPAWEK.Q               |                 | 21.88       | 6                   | 1                  |
|             |          |       |               |        |     | 115                | 122                                         | 432.73          | 863.45      | 863.48  | -0.03 | 0    | 39         | 0.0099479 | K.ALDFAASK.G                 |                 | 19.95       |                     |                    |
|             |          |       |               |        |     | 153                | 166                                         | 769.36          | 1536.71     | 1536.77 | -0.05 | 0    | 80         | 6.68E-07  | R.FAIQDISVEETSAK.E           |                 | 20.48       |                     |                    |
|             |          |       |               |        |     | 234                | 239                                         | 374.7           | 747.38      | 747.42  | -0.04 | 0    | 40         | 0.0100331 | K.YLDIPK.M                   |                 | 19.2        |                     |                    |
|             |          |       |               |        |     | 746                | 757                                         | 715.36          | 1428.71     | 1428.76 | -0.04 | 0    | 70         | 6.66E-06  | R.TINEVENQLTR.D              |                 | 20.17       |                     |                    |
|             |          |       |               |        |     | 761                | 771                                         | 684.79          | 1367.57     | 1367.61 | -0.04 | 0    | 74         | 2.70E-06  | K.GISQEQMQEFR.A              | Oxidation (M)   | 14.38       |                     |                    |
|             |          |       |               |        |     | 870                | 882                                         | 781.35          | 1560.68     | 1560.72 | -0.05 | 0    | 49         | 0.0007827 | R.ELPPDQAEYCIAR.M            |                 | 19.55       |                     |                    |
| P13639      | 7%       | 273   | 6             | 96246  | 6.4 | P13639 EF2_HUMAN   | Elongation factor 2                         | OS=Homo sapiens | GN=EEF2     | PE=1    | SV=4  |      |            |           |                              | modifications   | retent time | Strongest gel slice | # gel slices found |
|             |          |       |               |        |     | 2                  | 10                                          | 546.28          | 1090.55     | 1090.58 | -0.03 | 0    | 51         | 0.000693  | M.VNFTVDQIR.A                |                 | 19.86       | 6                   | 1                  |
|             |          |       |               |        |     | 227                | 235                                         | 551.76          | 1101.51     | 1101.52 | -0.01 | 0    | 48         | 0.0012761 | K.QFAEMYVAK.F                | Oxidation (M)   | 16.07       |                     |                    |
|             |          |       |               |        |     | 240                | 249                                         | 507.24          | 1012.46     | 1012.49 | -0.04 | 0    | 34         | 0.0255303 | K.GEGQLGPAER.A               |                 | 12.94       |                     |                    |
|             |          |       |               |        |     | 416                | 426                                         | 554.3           | 1106.59     | 1106.63 | -0.04 | 0    | 71         | 6.17E-06  | R.VFSGLVSTGLK.V              |                 | 20.21       |                     |                    |
|             |          |       |               |        |     | 429                | 438                                         | 547.26          | 1092.5      | 1092.53 | -0.03 | 0    | 36         | 0.0170281 | R.IMGPNYTPGK.K               | Oxidation (M)   | 13.81       |                     |                    |
|             |          |       |               |        |     | 717                | 726                                         | 485.26          | 968.51      | 968.54  | -0.03 | 0    | 33         | 0.0323911 | R.GGGQIIPAR.R                |                 | 14.9        |                     |                    |
| P05362      | 7%       | 123   | 3             | 58587  | 8.3 | P05362 ICAM1_HUMAN | Intercellular adhesion molecule 1           | OS=Homo sapiens | GN=ICAM1    | PE=1    | SV=2  |      |            |           |                              | modifications   | retent time | Strongest gel slice | # gel slices found |
|             |          |       |               |        |     | 41                 | 56                                          | 848.35          | 1694.69     | 1694.76 | -0.07 | 0    | 45         | 0.0017084 | R.GGSVLVTCSTSCDQPK.L         |                 | 14.86       | 6                   | 1                  |
|             |          |       |               |        |     | 57                 | 66                                          | 540.82          | 1079.63     | 1079.66 | -0.03 | 0    | 42         | 0.0046497 | K.LLGIETPLPK.K               |                 | 20.83       |                     |                    |
|             |          |       |               |        |     | 135                | 143                                         | 487.21          | 972.41      | 972.44  | -0.03 | 0    | 36         | 0.0224255 | R.CQVEGGAPR.A                |                 | 12.21       |                     |                    |
| P22314      | 2%       | 107   | 2             | 118858 | 5.5 | P22314 UBA1_HUMAN  | Ubiquitin-like modifier-activating enzyme 1 | OS=Homo sapiens | GN=UBA1     | PE=1    | SV=3  |      |            |           |                              | modifications   | retent time | Strongest gel slice | # gel slices found |
|             |          |       |               |        |     | 870                | 880                                         | 625.77          | 1249.53     | 1249.56 | -0.02 | 0    | 50         | 0.0006506 | R.AENYDIPSAHR.H              |                 | 16.42       | 6                   | 1                  |
|             |          |       |               |        |     | 1011               | 1021                                        | 652.81          | 1303.61     | 1303.64 | -0.03 | 0    | 58         | 0.0001085 | R.LDQPMTEIVSR.V              | Oxidation (M)   | 15.73       |                     |                    |
| P08238      | 32%      | 1334  | 22            | 83554  | 5   | P08238 HS90B_HUMAN | Heat shock protein HSP 90-beta              | OS=Homo sapiens | GN=HSP90AB1 | PE=1    | SV=4  |      |            |           |                              | modifications   | retent time | Strongest gel slice | # gel slices found |
|             |          |       |               |        |     | 42                 | 53                                          | 638.31          | 1274.6      | 1274.64 | -0.03 | 0    | 64         | 2.71E-05  | R.ELISNASDALDK.I             |                 | 19.46       | 7                   | 4                  |
|             |          |       |               |        |     | 42                 | 55                                          | 515.59          | 1543.76     | 1543.82 | -0.06 | 1    | 70         | 7.70E-06  | R.ELISNASDALDKIR.Y           |                 | 20.17       |                     |                    |
|             |          |       |               |        |     | 56                 | 69                                          | 513.91          | 1538.7      | 1538.75 | -0.05 | 1    | 40         | 0.0065588 | R.YESLTDPSKLDGSGK.E          |                 | 18.54       |                     |                    |
|             |          |       |               |        |     | 73                 | 82                                          | 597.81          | 1193.6      | 1193.64 | -0.04 | 0    | 57         | 0.0001282 | K.IDIIPNPQER.T               |                 | 19.9        |                     |                    |
|             |          |       |               |        |     | 83                 | 95                                          | 683.35          | 1364.69     | 1364.72 | -0.03 | 0    | 79         | 9.75E-07  | R.TLTLVDTGIGMTK.A            | Oxidation (M)   | 19.99       |                     |                    |
|             |          |       |               |        |     | 96                 | 107                                         | 621.84          | 1241.66     | 1241.7  | -0.04 | 0    | 80         | 8.11E-07  | K.ADLINLNGTIK.S              |                 | 20.52       |                     |                    |
|             |          |       |               |        |     | 187                | 196                                         | 656.27          | 1310.52     | 1310.56 | -0.04 | 0    | 75         | 1.92E-06  | K.EDQTEYLEER.R               |                 | 17.63       |                     |                    |
|             |          |       |               |        |     | 205                | 219                                         | 603.63          | 1807.87     | 1807.95 | -0.08 | 0    | 41         | 0.0055055 | K.HSQFIFGPIITLYLEK.E         |                 | 21.57       |                     |                    |
|             |          |       |               |        |     | 292                | 306                                         | 924.38          | 1846.74     | 1846.79 | -0.05 | 0    | 79         | 7.35E-07  | R.NPDDITQEEYGEFYK.S          |                 | 20.34       |                     |                    |
|             |          |       |               |        |     | 331                | 337                                         | 415.25          | 828.49      | 828.52  | -0.04 | 0    | 36         | 0.0239868 | R.ALLFIPR.R                  |                 | 21          |                     |                    |
|             |          |       |               |        |     | 338                | 348                                         | 455.56          | 1363.66     | 1363.72 | -0.06 | 2    | 40         | 0.0069471 | R.RAPFDLFEK.K                |                 | 19.77       |                     |                    |
|             |          |       |               |        |     | 339                | 347                                         | 540.75          | 1079.48     | 1079.53 | -0.04 | 0    | 55         | 0.0002053 | R.APFDLFENK.K                |                 | 21.31       |                     |                    |
|             |          |       |               |        |     | 379                | 392                                         | 757.38          | 1512.74     | 1512.78 | -0.04 | 0    | 101        | 5.85E-09  | R.GVVDSEDLPLNISR.E           |                 | 20.61       |                     |                    |
|             |          |       |               |        |     | 429                | 435                                         | 446.2           | 890.39      | 890.42  | -0.03 | 0    | 38         | 0.0139103 | K.FYEAFSK.N                  |                 | 19.24       |                     |                    |
|             |          |       |               |        |     | 439                | 448                                         | 381.17          | 1140.49     | 1140.55 | -0.06 | 0    | 39         | 0.0080715 | K.LGIHEDSTNR.R               |                 | 12.6        |                     |                    |
|             |          |       |               |        |     | 457                | 475                                         | 731.63          | 2191.86     | 2191.93 | -0.08 | 0    | 82         | 3.29E-07  | R.YHTSQSGDEMSTLSEYVSR.M      | Oxidation (M)   | 19.2        |                     |                    |
|             |          |       |               |        |     | 482                | 491                                         | 580.78          | 1159.54     | 1159.58 | -0.04 | 0    | 50         | 0.0009063 | K.SIYYITGESK.E               |                 | 19.5        |                     |                    |
|             |          |       |               |        |     | 492                | 502                                         | 625.3           | 1248.59     | 1248.61 | -0.02 | 0    | 85         | 2.05E-07  | K.EQVANSFAVER.V              |                 | 16.12       |                     |                    |
|             |          |       |               |        |     | 532                | 538                                         | 367.21          | 732.41      | 732.44  | -0.02 | 0    | 49         | 0.0012801 | K.SLVSVTKE.Y                 |                 | 13.86       |                     |                    |
|             |          |       |               |        |     | 558                | 565                                         | 505.24          | 1008.47     | 1008.51 | -0.04 | 1    | 39         | 0.0076708 | K.AKFENLCK.L                 |                 | 13.13       |                     |                    |
|             |          |       |               |        |     | 613                | 623                                         | 648.74          | 1295.46     | 1295.48 | -0.02 | 0    | 46         | 0.0016086 | R.DNSTMGVYMAK.K              | 3 Oxidation (M) | 12.39       |                     |                    |
|             |          |       |               |        |     | 625                | 639                                         | 594.97          | 1781.88     | 1781.94 | -0.06 | 0    | 62         | 4.03E-05  | K.HLEINPDHPVETLR.Q           |                 | 19.64       |                     |                    |
| Q14108      | 28%      | 571   | 12            | 54712  | 5   | Q14108 SCRB2_HUMAN | Lysosome membrane protein 2                 | OS=Homo sapiens | GN=SCARB2   | PE=1    | SV=2  |      |            |           |                              | modifications   | retent time | Strongest gel slice | # gel slices found |
|             |          |       |               |        |     | 32                 | 39                                          | 445.22          | 888.42      | 888.46  | -0.04 | 0    | 34         | 0.0344878 | K.AVDQSIEK.K                 |                 | 12.56       | 7                   | 3                  |
|             |          |       |               |        |     | 78                 | 92                                          | 584.94          | 1751.79     | 1751.85 | -0.06 | 1    | 64         | 2.80E-05  | R.GETPRVEEYGPYTYR.E          |                 | 19.15       |                     |                    |
|             |          |       |               |        |     | 83                 | 92                                          | 606.78          | 1211.54     | 1211.58 | -0.04 | 0    | 60         | 7.11E-05  | R.VEEVGPYTYR.E               |                 | 19.11       |                     |                    |
|             |          |       |               |        |     | 116                | 121                                         | 392.69          | 783.36      | 783.39  | -0.03 | 0    | 32         | 0.041771  | K.AYVFER.D                   |                 | 17.85       |                     |                    |
|             |          |       |               |        |     | 154                | 161                                         | 481.75          | 961.48      | 961.52  | -0.04 | 0    | 37         | 0.0154666 | R.EIIEAMLK.A                 | Oxidation (M)   | 18.93       |                     |                    |
|             |          |       |               |        |     | 228                | 234                                         | 423.21          | 844.41      | 844.44  | -0.03 | 0    | 34         | 0.0404341 | K.IVEVNGK.T                  |                 | 16.16       |                     |                    |
|             |          |       |               |        |     | 263                | 275                                         | 823.86          | 1645.7      | 1645.74 | -0.05 | 0    | 60         | 6.47E-05  | K.DEVLYVFPDFCR.S             |                 | 22.27       |                     |                    |
|             |          |       |               |        |     | 331                | 348                                         | 703.65          | 2107.92     | 2107.98 | -0.06 | 0    | 41         | 0.0047293 | K.NGAPIIMSFPFYQADER.F        | Oxidation (M)   | 20.87       |                     |                    |
|             |          |       |               |        |     | 349                | 378                                         | 845.89          | 3379.52     | 3379.68 | -0.15 | 0    | 33         | 0.0231723 | R.FVSAIEGHPNQEDHETFDINPLTGII | Oxidation (M)   | 21.92       |                     |                    |
|             |          |       |               |        |     | 391                | 402                                         | 469.89          | 1406.64     | 1406.7  | -0.07 | 1    | 46         | 0.0016811 | K.KLDDFVETGDIR.T             |                 | 19.86       |                     |                    |

| accession # | coverage | score | stinct peptid | mass  | pl  | start AA | end AA      | m/z obs                              | M obs           | M calc      | delta | miss | pept score | exp val   | peptide                 | modifications   | retent time | Strongest gel slice | # gel slices found |
|-------------|----------|-------|---------------|-------|-----|----------|-------------|--------------------------------------|-----------------|-------------|-------|------|------------|-----------|-------------------------|-----------------|-------------|---------------------|--------------------|
|             |          |       |               |       |     | 460      | 472         | 684.77                               | 1367.53         | 1367.53     | 0.01  | 0    | 51         | 0.0005005 | K.GQGSMDDEGTADER.A      | Oxidation (M)   |             |                     | 12.04              |
|             |          |       |               |       |     | 460      | 477         | 640.28                               | 1917.81         | 1917.89     | -0.07 | 1    | 80         | 5.46E-07  | K.GQGSMDDEGTADERAPLIR.T | Oxidation (M)   |             |                     | 15.04              |
| P07900      | 23%      | 1033  | 16            | 85006 | 4.9 | P07900   | HS90A_HUMAN | Heat shock protein HSP 90-alpha      | OS=Homo sapiens | GN=HSP90AA1 | PE=1  | SV=5 |            |           |                         | modifications   |             | 7                   | 4                  |
|             |          |       |               |       |     | 47       | 58          | 646.31                               | 1290.61         | 1290.63     | -0.02 | 0    | 103        | 3.75E-09  | R.ELISNSSDALDK.I        |                 |             |                     | 18.63              |
|             |          |       |               |       |     | 47       | 60          | 520.92                               | 1559.73         | 1559.82     | -0.08 | 1    | 59         | 8.40E-05  | R.ELISNSSDALDKIR.Y      |                 |             |                     | 19.59              |
|             |          |       |               |       |     | 61       | 74          | 513.91                               | 1538.7          | 1538.75     | -0.05 | 1    | 40         | 0.0065588 | R.YESLTDPPSKLDSGK.E     |                 |             |                     | 18.54              |
|             |          |       |               |       |     | 88       | 100         | 683.35                               | 1364.69         | 1364.72     | -0.03 | 0    | 79         | 9.75E-07  | R.TLTIIVDTGIGMTK.A      | Oxidation (M)   |             |                     | 19.99              |
|             |          |       |               |       |     | 101      | 112         | 621.84                               | 1241.66         | 1241.7      | -0.04 | 0    | 80         | 8.11E-07  | K.ADLINLNGTIK.R         |                 |             |                     | 20.52              |
|             |          |       |               |       |     | 192      | 201         | 656.27                               | 1310.52         | 1310.56     | -0.04 | 0    | 75         | 1.92E-06  | K.EDQTEYLEER.S          |                 |             |                     | 17.63              |
|             |          |       |               |       |     | 300      | 314         | 917.36                               | 1832.71         | 1832.77     | -0.06 | 0    | 109        | 7.06E-10  | R.NPDDITNEEYGEFYK.S     |                 |             |                     | 20.3               |
|             |          |       |               |       |     | 346      | 355         | 422.21                               | 1263.6          | 1263.64     | -0.03 | 1    | 53         | 0.0003802 | R.RAPFDLFENR.K          |                 |             |                     | 20.79              |
|             |          |       |               |       |     | 347      | 355         | 554.76                               | 1107.5          | 1107.53     | -0.03 | 0    | 49         | 0.0008091 | R.APFDFLENR.K           |                 |             |                     | 21.44              |
|             |          |       |               |       |     | 387      | 400         | 757.38                               | 1512.74         | 1512.78     | -0.04 | 0    | 101        | 5.85E-09  | R.GVVVSEDLPLNISR.E      |                 |             |                     | 20.61              |
|             |          |       |               |       |     | 447      | 456         | 390.18                               | 1167.52         | 1167.56     | -0.05 | 0    | 36         | 0.0189818 | K.LGIHEDVLSQNR.K        |                 |             |                     | 12.52              |
|             |          |       |               |       |     | 465      | 478         | 783.83                               | 1565.65         | 1565.69     | -0.05 | 0    | 49         | 0.0007272 | R.YYTSASGDEMVSLLK.D     | Oxidation (M)   |             |                     | 18.8               |
|             |          |       |               |       |     | 490      | 499         | 612.8                                | 1223.59         | 1223.62     | -0.03 | 0    | 43         | 0.0033891 | K.HIYYITGETK.D          |                 |             |                     | 15.69              |
|             |          |       |               |       |     | 500      | 510         | 618.3                                | 1234.6          | 1234.59     | 0     | 0    | 70         | 7.85E-06  | K.DQVANSFAFVER.L        |                 |             |                     | 17.55              |
|             |          |       |               |       |     | 540      | 546         | 374.22                               | 746.42          | 746.45      | -0.03 | 0    | 38         | 0.014303  | K.TLVSVTK.E             |                 |             |                     | 13.65              |
|             |          |       |               |       |     | 621      | 631         | 610.74                               | 1219.46         | 1219.48     | -0.02 | 0    | 50         | 0.0007594 | R.DNSTMGVMAAK.K         | 2 Oxidation (M) |             |                     | 12.43              |
| P06396      | 11%      | 432   | 8             | 86043 | 5.9 | P06396   | GELS_HUMAN  | Gelsolin                             | OS=Homo sapiens | GN=GSN      | PE=1  | SV=1 |            |           |                         | modifications   |             | 7                   | 1                  |
|             |          |       |               |       |     | 178      | 188         | 425.89                               | 1274.66         | 1274.71     | -0.05 | 0    | 36         | 0.0180151 | K.HVVPNEVVVQR.L         |                 |             |                     | 13.95              |
|             |          |       |               |       |     | 361      | 368         | 441.72                               | 881.43          | 881.45      | -0.02 | 0    | 44         | 0.0023984 | K.TASDFTK.M             |                 |             |                     | 15.34              |
|             |          |       |               |       |     | 374      | 390         | 915.45                               | 1828.89         | 1828.96     | -0.06 | 0    | 77         | 1.15E-06  | K.QTQVSVLPEGGETPLFK.Q   |                 |             |                     | 20.96              |
|             |          |       |               |       |     | 578      | 584         | 378.22                               | 754.42          | 754.46      | -0.04 | 0    | 50         | 0.0005402 | R.AVEVLPK.A             |                 |             |                     | 14.78              |
|             |          |       |               |       |     | 585      | 597         | 660.33                               | 1318.64         | 1318.69     | -0.04 | 0    | 76         | 2.10E-06  | K.AGALNSNDAFVLK.T       |                 |             |                     | 20.12              |
|             |          |       |               |       |     | 714      | 728         | 555.91                               | 1664.7          | 1664.77     | -0.07 | 1    | 70         | 5.65E-06  | K.DSQEEETKALTSK.R       |                 |             |                     | 13.69              |
|             |          |       |               |       |     | 730      | 738         | 539.74                               | 1077.47         | 1077.51     | -0.04 | 0    | 38         | 0.0131702 | R.YIETDPANR.D           |                 |             |                     | 13.3               |
|             |          |       |               |       |     | 742      | 748         | 379.23                               | 756.44          | 756.47      | -0.03 | 0    | 41         | 0.0060963 | R.TPITVVK.Q             |                 |             |                     | 13.91              |
| P08195      | 8%       | 154   | 3             | 58023 | 5.2 | P08195   | 4F2_HUMAN   | 4F2 cell-surface antigen heavy chain | OS=Homo sapiens | GN=SLC3A2   | PE=1  | SV=2 |            |           |                         | modifications   |             | 7                   | 2                  |
|             |          |       |               |       |     | 45       | 59          | 496.24                               | 1485.71         | 1485.77     | -0.06 | 1    | 50         | 0.0007278 | K.IKVAEDEAEAAAAA.F      |                 |             |                     | 15.56              |
|             |          |       |               |       |     | 339      | 350         | 686.4                                | 1370.79         | 1370.83     | -0.04 | 0    | 39         | 0.008884  | R.LLTSFLPAQLLR.L        |                 |             |                     | 22.97              |
|             |          |       |               |       |     | 410      | 423         | 753.38                               | 1504.75         | 1504.75     | -0.01 | 0    | 65         | 2.14E-05  | K.GQSEDPGSLLSLFR.R      |                 |             |                     | 22.79              |
| Q14974      | 6%       | 247   | 4             | 98420 | 4.7 | Q14974   | IMB1_HUMAN  | Importin subunit beta-1              | OS=Homo sapiens | GN=KPNB1    | PE=1  | SV=2 |            |           |                         | modifications   |             | 7                   | 1                  |
|             |          |       |               |       |     | 28       | 42          | 829.93                               | 1657.84         | 1657.9      | -0.06 | 0    | 45         | 0.0019731 | R.AAVENLPTFLVELSR.V     |                 |             |                     | 23.36              |
|             |          |       |               |       |     | 43       | 54          | 613.32                               | 1224.62         | 1224.66     | -0.04 | 0    | 63         | 3.71E-05  | R.VLANPQNSQVAR.V        |                 |             |                     | 13.17              |
|             |          |       |               |       |     | 192      | 206         | 803.43                               | 1604.85         | 1604.88     | -0.02 | 0    | 76         | 1.52E-06  | K.LAATNALLNSLEFK.A      |                 |             |                     | 21.97              |
|             |          |       |               |       |     | 235      | 243         | 478.29                               | 954.56          | 954.59      | -0.02 | 0    | 32         | 0.0444877 | R.VAALQNLVK.I           |                 |             |                     | 19.73              |
| P14780      | 3%       | 102   | 2             | 79433 | 5.6 | P14780   | MMP9_HUMAN  | Matrix metalloproteinase-9           | OS=Homo sapiens | GN=MMP9     | PE=1  | SV=2 |            |           |                         | modifications   |             | 7                   | 1                  |
|             |          |       |               |       |     | 25       | 36          | 673.35                               | 1344.69         | 1344.74     | -0.05 | 0    | 45         | 0.0022226 | R.QSTLVLFPGDLR.T        |                 |             |                     | 21.62              |
|             |          |       |               |       |     | 66       | 76          | 576.86                               | 1151.7          | 1151.73     | -0.03 | 0    | 56         | 0.0001611 | K.SLGPALLLQK.Q          |                 |             |                     | 21.84              |
| P26038      | 14%      | 352   | 9             | 67892 | 6.1 | P26038   | MOES_HUMAN  | Moesin                               | OS=Homo sapiens | GN=MSN      | PE=1  | SV=3 |            |           |                         | modifications   |             | 8                   | 2                  |
|             |          |       |               |       |     | 28       | 35          | 488.76                               | 975.5           | 975.54      | -0.04 | 0    | 38         | 0.0130607 | K.QLFDQVVK.T            |                 |             |                     | 19.89              |
|             |          |       |               |       |     | 185      | 193         | 540.27                               | 1078.52         | 1078.55     | -0.04 | 0    | 36         | 0.0175475 | R.EDAVLEYLK.I           |                 |             |                     | 20.91              |
|             |          |       |               |       |     | 238      | 246         | 552.77                               | 1103.53         | 1103.58     | -0.04 | 0    | 50         | 0.0008495 | K.IGFPWSEIR.N           |                 |             |                     | 21.96              |
|             |          |       |               |       |     | 295      | 306         | 496.91                               | 1487.72         | 1487.78     | -0.06 | 1    | 37         | 0.0129978 | R.RKPDITVQQMK.A         | Oxidation (M)   |             |                     | 12.15              |
|             |          |       |               |       |     | 372      | 379         | 494.23                               | 986.45          | 986.5       | -0.05 | 0    | 33         | 0.046668  | R.ALELEQER.K            |                 |             |                     | 15.71              |
|             |          |       |               |       |     | 401      | 408         | 444.24                               | 886.46          | 886.49      | -0.03 | 0    | 35         | 0.0325341 | K.EALLQASR.D            |                 |             |                     | 14.71              |
|             |          |       |               |       |     | 428      | 435         | 482.24                               | 962.46          | 962.49      | -0.03 | 0    | 34         | 0.0318729 | R.ISQLEMAR.Q            | Oxidation (M)   |             |                     | 13.1               |
|             |          |       |               |       |     | 449      | 458         | 603.77                               | 1205.52         | 1205.56     | -0.04 | 0    | 51         | 0.0005997 | K.AQMVQEDLEK.T          | Oxidation (M)   |             |                     | 13.41              |
|             |          |       |               |       |     | 569      | 577         | 585.74                               | 1169.47         | 1169.5      | -0.03 | 1    | 40         | 0.0072161 | K.QRIDEFESM.-           | Oxidation (M)   |             |                     | 17.23              |
| P11021      | 14%      | 453   | 8             | 72402 | 5.1 | P11021   | GRP78_HUMAN | 78 kDa glucose-regulated protein     | OS=Homo sapiens | GN=HSPA5    | PE=1  | SV=2 |            |           |                         | modifications   |             | 8                   | 2                  |
|             |          |       |               |       |     | 50       | 60          | 614.79                               | 1227.57         | 1227.62     | -0.05 | 0    | 73         | 4.19E-06  | R.VEIIANDQGNR.I         |                 |             |                     | 14.54              |
|             |          |       |               |       |     | 61       | 74          | 783.87                               | 1565.72         | 1565.77     | -0.05 | 0    | 63         | 2.87E-05  | R.ITPSYVAFPTPEGR.L      |                 |             |                     | 20.24              |
|             |          |       |               |       |     | 82       | 96          | 839.38                               | 1676.75         | 1676.8      | -0.05 | 0    | 83         | 3.45E-07  | K.NQLTSNPENTVFDKAR.R    |                 |             |                     | 19.71              |
|             |          |       |               |       |     | 82       | 97          | 611.95                               | 1832.83         | 1832.9      | -0.07 | 1    | 43         | 0.0027831 | K.NQLTSNPENTVFDKAR.L    |                 |             |                     | 19.18              |
|             |          |       |               |       |     | 124      | 138         | 535.6                                | 1603.78         | 1603.86     | -0.08 | 0    | 50         | 0.0007251 | K.TKPIYQVIGGGQTK.T      |                 |             |                     | 19.14              |
|             |          |       |               |       |     | 139      | 152         | 776.87                               | 1551.73         | 1551.79     | -0.05 | 0    | 57         | 0.0001333 | K.TFAPPEEISAMVLT.K.M    | Oxidation (M)   |             |                     | 20.95              |
|             |          |       |               |       |     | 186      | 197         | 617.29                               | 1232.57         | 1232.62     | -0.04 | 0    | 34         | 0.0282969 | K.DAGTIAGLNVMR.I        | Oxidation (M)   |             |                     | 19.62              |
|             |          |       |               |       |     | 524      | 532         | 537.76                               | 1073.51         | 1073.55     | -0.04 | 0    | 51         | 0.000665  | K.IITINDQNR.L           |                 |             |                     | 13.15              |
| P15311      | 9%       | 232   | 6             | 69484 | 5.9 | P15311   | EZR1_HUMAN  | Ezrin                                | OS=Homo sapiens | GN=EZR      | PE=1  | SV=4 |            |           |                         | modifications   |             | 8                   | 2                  |
|             |          |       |               |       |     | 28       | 35          | 488.76                               | 975.5           | 975.54      | -0.04 | 0    | 38         | 0.0130607 | K.QLFDQVVK.T            |                 |             |                     | 19.89              |
|             |          |       |               |       |     | 238      | 246         | 552.77                               | 1103.53         | 1103.58     | -0.04 | 0    | 50         | 0.0008495 | K.IGFPWSEIR.N           |                 |             |                     | 21.96              |
|             |          |       |               |       |     | 295      | 306         | 496.91                               | 1487.72         | 1487.78     | -0.06 | 1    | 37         | 0.0129978 | R.RKPDITVQQMK.A         | Oxidation (M)   |             |                     | 12.15              |



|             |          |       |               |       |     |                    |                                                                          |                 |             |         |         |       |            |         |           |                           |                                        |                     |                    |
|-------------|----------|-------|---------------|-------|-----|--------------------|--------------------------------------------------------------------------|-----------------|-------------|---------|---------|-------|------------|---------|-----------|---------------------------|----------------------------------------|---------------------|--------------------|
|             |          |       |               |       |     |                    | 309                                                                      | 323             | 766.37      | 1530.72 | 1530.78 | -0.06 | 0          | 77      | 1.23E-06  | R.TALVANTSNPVAAR.E        | Oxidation (M)                          |                     | 14.17              |
|             |          |       |               |       |     |                    | 339                                                                      | 353             | 579.2       | 1734.57 | 1734.66 | -0.09 | 0          | 44      | 0.0024871 | R.DMGYHVSNMADTSR.W        | 3 Oxidation (M)                        |                     | 12.87              |
|             |          |       |               |       |     |                    | 586                                                                      | 596             | 416.53      | 1246.57 | 1246.66 | -0.09 | 2          | 42      | 0.0044252 | K.FKDPKLGGEAK.I           |                                        |                     | 13.43              |
| accession # | coverage | score | stinct peptid | mass  | pl  | start AA           | end AA                                                                   | m/z obs         | M obs       | M calc  | delta   | miss  | pept score | exp val | peptide   | modifications             | retent time                            | Strongest gel slice | # gel slices found |
| P34931      | 10%      | 298   | 5             | 70730 | 5.8 | P34931 HS71L_HUMAN | Heat shock 70 kDa protein 1                                              | OS=Homo sapiens | GN=HSPA1L   | PE=2    | SV=2    |       |            |         |           |                           |                                        | 9                   | 1                  |
|             |          |       |               |       |     |                    | 28                                                                       | 38              | 614.78      | 1227.55 | 1227.62 | -0.07 | 0          | 70      | 9.16E-06  | K.VEIIANDQGNR.T           |                                        |                     | 14.21              |
|             |          |       |               |       |     |                    | 39                                                                       | 51              | 744.33      | 1486.65 | 1486.69 | -0.05 | 0          | 62      | 4.57E-05  | R.TTPSYVAFTDTER.L         |                                        |                     | 19.76              |
|             |          |       |               |       |     |                    | 174                                                                      | 189             | 830.42      | 1658.82 | 1658.89 | -0.07 | 0          | 80      | 5.85E-07  | R.IINEPTAAAIAYGLDK.G      |                                        |                     | 20.9               |
|             |          |       |               |       |     |                    | 223                                                                      | 238             | 559.23      | 1674.66 | 1674.72 | -0.07 | 0          | 49      | 0.000713  | K.ATAGDTHLGGEDFDNR.L      |                                        |                     | 15.08              |
|             |          |       |               |       |     |                    | 542                                                                      | 552             | 652.28      | 1302.55 | 1302.59 | -0.04 | 0          | 37      | 0.0148311 | K.NALESYAFNMK.S           | Oxidation (M)                          |                     | 19.85              |
| accession # | coverage | score | stinct peptid | mass  | pl  | start AA           | end AA                                                                   | m/z obs         | M obs       | M calc  | delta   | miss  | pept score | exp val | peptide   | modifications             | retent time                            | Strongest gel slice | # gel slices found |
| P17066      | 9%       | 308   | 6             | 71440 | 5.8 | P17066 HSP76_HUMAN | Heat shock 70 kDa protein 6                                              | OS=Homo sapiens | GN=HSPA6    | PE=1    | SV=2    |       |            |         |           |                           |                                        | 9                   | 3                  |
|             |          |       |               |       |     |                    | 28                                                                       | 38              | 614.78      | 1227.55 | 1227.62 | -0.07 | 0          | 70      | 9.16E-06  | R.VEIIANDQGNR.T           |                                        |                     | 14.21              |
|             |          |       |               |       |     |                    | 39                                                                       | 51              | 744.33      | 1486.65 | 1486.69 | -0.05 | 0          | 62      | 4.57E-05  | R.TTPSYVAFTDTER.L         |                                        |                     | 19.76              |
|             |          |       |               |       |     |                    | 223                                                                      | 238             | 559.23      | 1674.66 | 1674.72 | -0.07 | 0          | 49      | 0.000713  | K.ATAGDTHLGGEDFDNR.L      |                                        |                     | 15.08              |
|             |          |       |               |       |     |                    | 351                                                                      | 359             | 541.26      | 1080.51 | 1080.56 | -0.05 | 0          | 51      | 0.0005552 | K.LLQDFFNKG.E             |                                        |                     | 21.07              |
|             |          |       |               |       |     |                    | 351                                                                      | 363             | 522.59      | 1564.75 | 1564.82 | -0.08 | 1          | 42      | 0.0037475 | K.LLQDFFNKELNK.S          |                                        |                     | 20.73              |
|             |          |       |               |       |     |                    | 512                                                                      | 519             | 495.24      | 988.47  | 988.52  | -0.05 | 1          | 34      | 0.0345733 | R.LSKEEVER.M              |                                        |                     | 12.74              |
| accession # | coverage | score | stinct peptid | mass  | pl  | start AA           | end AA                                                                   | m/z obs         | M obs       | M calc  | delta   | miss  | pept score | exp val | peptide   | modifications             | retent time                            | Strongest gel slice | # gel slices found |
| P08107      | 9%       | 276   | 5             | 70294 | 5.5 | P08107 HSP71_HUMAN | Heat shock 70 kDa protein 1                                              | OS=Homo sapiens | GN=HSPA1A   | PE=1    | SV=5    |       |            |         |           |                           |                                        | 9                   | 2                  |
|             |          |       |               |       |     |                    | 26                                                                       | 36              | 614.78      | 1227.55 | 1227.62 | -0.07 | 0          | 70      | 9.16E-06  | K.VEIIANDQGNR.T           |                                        |                     | 14.21              |
|             |          |       |               |       |     |                    | 37                                                                       | 49              | 744.33      | 1486.65 | 1486.69 | -0.05 | 0          | 62      | 4.57E-05  | R.TTPSYVAFTDTER.L         |                                        |                     | 19.76              |
|             |          |       |               |       |     |                    | 221                                                                      | 236             | 559.23      | 1674.66 | 1674.72 | -0.07 | 0          | 49      | 0.000713  | K.ATAGDTHLGGEDFDNR.L      |                                        |                     | 15.08              |
|             |          |       |               |       |     |                    | 349                                                                      | 357             | 555.27      | 1108.53 | 1108.57 | -0.04 | 0          | 58      | 9.81E-05  | K.LLQDFFNGR.D             |                                        |                     | 21.29              |
|             |          |       |               |       |     |                    | 540                                                                      | 550             | 652.28      | 1302.55 | 1302.59 | -0.04 | 0          | 37      | 0.0148311 | K.NALESYAFNMK.S           | Oxidation (M)                          |                     | 19.85              |
| accession # | coverage | score | stinct peptid | mass  | pl  | start AA           | end AA                                                                   | m/z obs         | M obs       | M calc  | delta   | miss  | pept score | exp val | peptide   | modifications             | retent time                            | Strongest gel slice | # gel slices found |
| P38646      | 9%       | 288   | 5             | 73920 | 5.9 | P38646 GRP75_HUMAN | Stress-70 protein, mitochondrial                                         | OS=Homo sapiens | GN=HSPA9    | PE=1    | SV=2    |       |            |         |           |                           |                                        | 9                   | 1                  |
|             |          |       |               |       |     |                    | 77                                                                       | 85              | 479.74      | 957.46  | 957.49  | -0.03 | 0          | 54      | 0.0003589 | K.VLENAEGAR.T             |                                        |                     | 12.61              |
|             |          |       |               |       |     |                    | 108                                                                      | 121             | 784.87      | 1567.73 | 1567.76 | -0.03 | 0          | 33      | 0.0294346 | R.QAVTNPNTFYATK.R         |                                        |                     | 17.29              |
|             |          |       |               |       |     |                    | 207                                                                      | 218             | 621.82      | 1241.63 | 1241.67 | -0.04 | 0          | 61      | 6.85E-05  | K.DAGQISGLNVL.R.V         |                                        |                     | 20.55              |
|             |          |       |               |       |     |                    | 395                                                                      | 405             | 645.82      | 1289.63 | 1289.67 | -0.04 | 0          | 57      | 0.0001271 | K.VQQTVDLQFGR.A           |                                        |                     | 20.46              |
|             |          |       |               |       |     |                    | 635                                                                      | 646             | 616.31      | 1230.61 | 1230.66 | -0.05 | 0          | 83      | 4.00E-07  | R.QAASSLQQASLK.L          |                                        |                     | 13.87              |
| accession # | coverage | score | stinct peptid | mass  | pl  | start AA           | end AA                                                                   | m/z obs         | M obs       | M calc  | delta   | miss  | pept score | exp val | peptide   | modifications             | retent time                            | Strongest gel slice | # gel slices found |
| P08133      | 5%       | 107   | 3             | 76168 | 5.4 | P08133 ANXA6_HUMAN | Annexin A6                                                               | OS=Homo sapiens | GN=ANXA6    | PE=1    | SV=3    |       |            |         |           |                           |                                        | 9                   | 1                  |
|             |          |       |               |       |     |                    | 282                                                                      | 290             | 554.25      | 1106.48 | 1106.53 | -0.04 | 0          | 34      | 0.0272914 | R.SELDMLDIR.E             | Oxidation (M)                          |                     | 20.16              |
|             |          |       |               |       |     |                    | 355                                                                      | 370             | 563.25      | 1686.72 | 1686.8  | -0.08 | 0          | 38      | 0.0101364 | K.GTVRPANDFNPDADAK.A      |                                        |                     | 13.95              |
|             |          |       |               |       |     |                    | 588                                                                      | 598             | 588.81      | 1175.6  | 1175.66 | -0.05 | 0          | 36      | 0.0194167 | R.DAFVAIVQSVK.N           |                                        |                     | 21.34              |
| accession # | coverage | score | stinct peptid | mass  | pl  | start AA           | end AA                                                                   | m/z obs         | M obs       | M calc  | delta   | miss  | pept score | exp val | peptide   | modifications             | retent time                            | Strongest gel slice | # gel slices found |
| P29728      | 4%       | 119   | 3             | 83348 | 8.6 | P29728 OAS2_HUMAN  | 2'-5'-oligoadenylate synthetase 2                                        | OS=Homo sapiens | GN=OAS2     | PE=1    | SV=3    |       |            |         |           |                           |                                        | 9                   | 1                  |
|             |          |       |               |       |     |                    | 116                                                                      | 122             | 446.7       | 891.39  | 891.45  | -0.05 | 0          | 34      | 0.0307289 | K.NNFIEIQK.S              |                                        |                     | 14.26              |
|             |          |       |               |       |     |                    | 123                                                                      | 134             | 678.36      | 1354.71 | 1354.71 | 0     | 0          | 44      | 0.0024744 | K.SLDGFTIQVFTK.N          |                                        |                     | 21.94              |
|             |          |       |               |       |     |                    | 464                                                                      | 470             | 397.22      | 792.43  | 792.47  | -0.04 | 0          | 42      | 0.0051036 | R.VLSFSLK.S               |                                        |                     | 20.33              |
| accession # | coverage | score | stinct peptid | mass  | pl  | start AA           | end AA                                                                   | m/z obs         | M obs       | M calc  | delta   | miss  | pept score | exp val | peptide   | modifications             | retent time                            | Strongest gel slice | # gel slices found |
| P04843      | 3%       | 102   | 2             | 68641 | 6   | P04843 RPNI1_HUMAN | Dolichyl-diphosphooligosaccharide--protein glycosyltransferase subunit 1 | OS=Homo sapiens | GN=RPNI1    | PE=1    | SV=1    |       |            |         |           |                           |                                        | 9                   | 2                  |
|             |          |       |               |       |     |                    | 194                                                                      | 204             | 656.29      | 1310.56 | 1310.61 | -0.05 | 0          | 51      | 0.0005352 | R.SEDLLDYGPF.R.D          |                                        |                     | 21.68              |
|             |          |       |               |       |     |                    | 269                                                                      | 278             | 530.25      | 1058.49 | 1058.54 | -0.05 | 0          | 51      | 0.0005875 | R.QPDSGSIIR.S             |                                        |                     | 14.43              |
| accession # | coverage | score | stinct peptid | mass  | pl  | start AA           | end AA                                                                   | m/z obs         | M obs       | M calc  | delta   | miss  | pept score | exp val | peptide   | modifications             | retent time                            | Strongest gel slice | # gel slices found |
| Q8IYS2      | 3%       | 75    | 2             | 69684 | 8.4 | Q8IYS2 K2013_HUMAN | Uncharacterized protein KIAA2013                                         | OS=Homo sapiens | GN=KIAA2013 | PE=2    | SV=1    |       |            |         |           |                           |                                        | 9                   | 2                  |
|             |          |       |               |       |     |                    | 206                                                                      | 214             | 542.76      | 1083.51 | 1083.57 | -0.06 | 0          | 42      | 0.0047821 | R.IQLNPNTER.V             |                                        |                     | 14.99              |
|             |          |       |               |       |     |                    | 310                                                                      | 316             | 393.71      | 785.41  | 785.44  | -0.03 | 0          | 33      | 0.0461934 | K.ALQDLAR.K               |                                        |                     | 15.34              |
| accession # | coverage | score | stinct peptid | mass  | pl  | start AA           | end AA                                                                   | m/z obs         | M obs       | M calc  | delta   | miss  | pept score | exp val | peptide   | modifications             | retent time                            | Strongest gel slice | # gel slices found |
| P49368      | 10%      | 208   | 5             | 61066 | 6.1 | P49368 TCPCG_HUMAN | T-complex protein 1 subunit gamma                                        | OS=Homo sapiens | GN=CCT3     | PE=1    | SV=4    |       |            |         |           |                           |                                        | 10                  | 1                  |
|             |          |       |               |       |     |                    | 238                                                                      | 248             | 640.35      | 1278.69 | 1278.71 | -0.01 | 0          | 47      | 0.0014761 | R.IVLLDSSLEYK.K           |                                        |                     | 20.92              |
|             |          |       |               |       |     |                    | 307                                                                      | 313             | 379.72      | 757.42  | 757.44  | -0.03 | 0          | 34      | 0.0440209 | R.ANITAIR.R               |                                        |                     | 13.97              |
|             |          |       |               |       |     |                    | 439                                                                      | 449             | 583.83      | 1165.65 | 1165.68 | -0.03 | 0          | 54      | 0.0002674 | R.AVAQALEVIPR.T           |                                        |                     | 20.22              |
|             |          |       |               |       |     |                    | 450                                                                      | 461             | 667.31      | 1332.61 | 1332.68 | -0.07 | 0          | 39      | 0.0085112 | R.TLIQNGGASTIR.L          |                                        |                     | 16.52              |
|             |          |       |               |       |     |                    | 508                                                                      | 518             | 593.35      | 1184.69 | 1184.71 | -0.03 | 0          | 35      | 0.028617  | K.TAVETAVLLLR.I           |                                        |                     | 21.58              |
| accession # | coverage | score | stinct peptid | mass  | pl  | start AA           | end AA                                                                   | m/z obs         | M obs       | M calc  | delta   | miss  | pept score | exp val | peptide   | modifications             | retent time                            | Strongest gel slice | # gel slices found |
| P31948      | 9%       | 253   | 5             | 63227 | 6.4 | P31948 STIP1_HUMAN | Stress-induced-phosphoprotein 1                                          | OS=Homo sapiens | GN=STIP1    | PE=1    | SV=1    |       |            |         |           |                           |                                        | 10                  | 1                  |
|             |          |       |               |       |     |                    | 1                                                                        | 10              | 653.31      | 1304.6  | 1304.63 | -0.02 | 1          | 51      | 0.0005305 | -.MEQVNLKEK.G             | Acetyl (Protein N-term); Oxidation (M) |                     | 14.79              |
|             |          |       |               |       |     |                    | 110                                                                      | 118             | 532.23      | 1062.45 | 1062.48 | -0.03 | 0          | 68      | 1.27E-05  | K.EGLQNMEAR.L             | Oxidation (M)                          |                     | 12.41              |
|             |          |       |               |       |     |                    | 352                                                                      | 364             | 744.88      | 1487.75 | 1487.79 | -0.03 | 0          | 66      | 1.59E-05  | R.LAYINPDLALEEK.N         |                                        |                     | 20.84              |
|             |          |       |               |       |     |                    | 454                                                                      | 462             | 504.72      | 1007.42 | 1007.46 | -0.04 | 0          | 34      | 0.0309612 | K.ALDLDSCK.E              |                                        |                     | 14.88              |
|             |          |       |               |       |     |                    | 534                                                                      | 543             | 558.82      | 1115.62 | 1115.64 | -0.02 | 0          | 36      | 0.0185266 | K.LMDVGLAIR.-             | Oxidation (M)                          |                     | 20.75              |
| accession # | coverage | score | stinct peptid | mass  | pl  | start AA           | end AA                                                                   | m/z obs         | M obs       | M calc  | delta   | miss  | pept score | exp val | peptide   | modifications             | retent time                            | Strongest gel slice | # gel slices found |
| Q99571      | 9%       | 147   | 2             | 44139 | 8.3 | Q99571 P2RX4_HUMAN | P2X purinoreceptor 4                                                     | OS=Homo sapiens | GN=P2RX4    | PE=2    | SV=2    |       |            |         |           |                           |                                        | 10                  | 1                  |
|             |          |       |               |       |     |                    | 53                                                                       | 67              | 800.88      | 1599.74 | 1599.76 | -0.02 | 0          | 79      | 8.30E-07  | K.GYQETDSVSSVTTK.V        |                                        |                     | 19.25              |
|             |          |       |               |       |     |                    | 128                                                                      | 148             | 660.6       | 1978.79 | 1978.84 | -0.05 | 0          | 68      | 9.99E-06  | K.SDASCTAGSAGTHSNGVSTGR.C |                                        |                     | 12.23              |

| accession # | coverage | score | stinct peptid | mass  | pl  | start AA | end AA      | m/z obs                                         | M obs                               | M calc  | delta | miss | pept score | exp val   | peptide              | modifications                            | retent time | Strongest gel slice | # gel slices found |  |  |
|-------------|----------|-------|---------------|-------|-----|----------|-------------|-------------------------------------------------|-------------------------------------|---------|-------|------|------------|-----------|----------------------|------------------------------------------|-------------|---------------------|--------------------|--|--|
| Q10471      | 9%       | 228   | 5             | 65433 | 8.6 | Q10471   | GALT2_HUMAN | Polypeptide N-acetylgalactosaminyltransferase 2 | OS=Homo sapiens GN=GALNT2 PE=1 SV=1 |         |       |      |            |           |                      |                                          |             | 10                  | 1                  |  |  |
|             |          |       |               |       |     | 94       | 101         | 447.2                                           | 892.39                              | 892.4   | -0.01 | 0    | 46         | 0.0016817 | R.SGODPYAR.N         |                                          | 12.49       |                     |                    |  |  |
|             |          |       |               |       |     | 102      | 113         | 493.24                                          | 1476.7                              | 1476.77 | -0.07 | 2    | 43         | 0.0034749 | R.NKFNQVQVSDKLR.M    |                                          | 13.14       |                     |                    |  |  |
|             |          |       |               |       |     | 155      | 162         | 437.28                                          | 872.54                              | 872.57  | -0.03 | 1    | 39         | 0.0122    | R.TVVSVLKK.S         |                                          | 13.4        |                     |                    |  |  |
|             |          |       |               |       |     | 294      | 302         | 462.25                                          | 922.49                              | 922.52  | -0.03 | 0    | 48         | 0.0010893 | R.QGNPVAPIK.T        |                                          | 13.36       |                     |                    |  |  |
|             |          |       |               |       |     | 303      | 315         | 706.33                                          | 1410.65                             | 1410.69 | -0.04 | 0    | 51         | 0.0004909 | K.TPMIAGGLFVMDK.F    | 2 Oxidation (M)                          | 20.53       |                     |                    |  |  |
| Q16555      | 6%       | 137   | 3             | 62711 | 6   | Q16555   | DPYL2_HUMAN | Dihydropyrimidinase-related protein 2           | OS=Homo sapiens GN=DPYSL2 PE=1 SV=1 |         |       |      |            |           |                      |                                          |             | 10                  | 1                  |  |  |
|             |          |       |               |       |     | 259      | 268         | 516.27                                          | 1030.52                             | 1030.54 | -0.02 | 0    | 43         | 0.0040904 | K.SSAEVIQAAR.K       |                                          | 13.53       |                     |                    |  |  |
|             |          |       |               |       |     | 375      | 390         | 871.37                                          | 1740.73                             | 1740.8  | -0.07 | 0    | 52         | 0.0003409 | K.MDENQFVAVTSTNAAK.V | Oxidation (M)                            | 19.34       |                     |                    |  |  |
|             |          |       |               |       |     | 441      | 451         | 542.81                                          | 1083.6                              | 1083.63 | -0.03 | 0    | 41         | 0.0054654 | R.GSPLVVISQGG.I      |                                          | 19.69       |                     |                    |  |  |
| Q9BYC5      | 4%       | 72    | 2             | 66930 | 7.4 | Q9BYC5   | FUT8_HUMAN  | Alpha-(1,6)-fucosyltransferase                  | OS=Homo sapiens GN=FUT8 PE=1 SV=2   |         |       |      |            |           |                      |                                          |             | 10                  | 1                  |  |  |
|             |          |       |               |       |     | 139      | 147         | 536.75                                          | 1071.49                             | 1071.53 | -0.04 | 0    | 40         | 0.0095085 | K.NLEGNELQQR.H       |                                          | 13.88       |                     |                    |  |  |
|             |          |       |               |       |     | 404      | 415         | 667.85                                          | 1333.68                             | 1333.71 | -0.04 | 0    | 32         | 0.0467341 | R.VVLTATDDPSLLK.E    |                                          | 20.4        |                     |                    |  |  |
| P50990      | 22%      | 622   | 11            | 60153 | 5.4 | P50990   | CPY2_HUMAN  | T-complex protein 1 subunit theta               | OS=Homo sapiens GN=CCT8 PE=1 SV=4   |         |       |      |            |           |                      |                                          |             | 11                  | 1                  |  |  |
|             |          |       |               |       |     | 63       | 74          | 667.36                                          | 1332.71                             | 1332.74 | -0.03 | 0    | 55         | 0.0002553 | K.LFVTDNDAATILR.E    |                                          | 20.97       |                     |                    |  |  |
|             |          |       |               |       |     | 156      | 165         | 573.79                                          | 1145.56                             | 1145.59 | -0.03 | 0    | 35         | 0.0267578 | R.DIDEVSSLLR.T       |                                          | 21.36       |                     |                    |  |  |
|             |          |       |               |       |     | 172      | 181         | 584.79                                          | 1167.57                             | 1167.59 | -0.02 | 0    | 74         | 2.98E-06  | K.QYGNVFLAK.L        |                                          | 19.66       |                     |                    |  |  |
|             |          |       |               |       |     | 226      | 235         | 532.74                                          | 1063.47                             | 1063.5  | -0.03 | 0    | 48         | 0.0012596 | K.ETEGDVTSVK.D       |                                          | 12.78       |                     |                    |  |  |
|             |          |       |               |       |     | 261      | 270         | 593.26                                          | 1184.51                             | 1184.54 | -0.03 | 0    | 40         | 0.0085682 | K.TAEELMNFSG.G       | Oxidation (M)                            | 17.92       |                     |                    |  |  |
|             |          |       |               |       |     | 271      | 281         | 625.27                                          | 1248.52                             | 1248.57 | -0.04 | 0    | 71         | 6.23E-06  | K.GEENLMDAQVK.A      | Oxidation (M)                            | 13.52       |                     |                    |  |  |
|             |          |       |               |       |     | 282      | 296         | 686.86                                          | 1371.71                             | 1371.74 | -0.03 | 0    | 99         | 9.72E-09  | K.AIADTGANVVVTGGK.V  |                                          | 18.57       |                     |                    |  |  |
|             |          |       |               |       |     | 327      | 335         | 443.24                                          | 884.47                              | 884.51  | -0.03 | 0    | 34         | 0.0309926 | K.TVGATAPRL.L        |                                          | 14.17       |                     |                    |  |  |
|             |          |       |               |       |     | 379      | 390         | 607.27                                          | 1212.53                             | 1212.57 | -0.04 | 0    | 38         | 0.0129072 | K.ITLDNAYMEK.C       |                                          | 18.79       |                     |                    |  |  |
|             |          |       |               |       |     | 441      | 450         | 575.78                                          | 1149.55                             | 1149.58 | -0.03 | 0    | 64         | 2.73E-05  | K.FAEFAEIPR.A        | Oxidation (M)                            | 18.88       |                     |                    |  |  |
|             |          |       |               |       |     | 510      | 520         | 564.83                                          | 1127.64                             | 1127.67 | -0.03 | 0    | 40         | 0.0078969 | K.LATNAAVTVLR.V      |                                          | 20.49       |                     |                    |  |  |
|             |          |       |               |       |     |          |             |                                                 |                                     |         |       |      |            |           |                      |                                          |             |                     | 19.36              |  |  |
| P14618      | 19%      | 491   | 8             | 58470 | 8   | P14618   | KPYM_HUMAN  | Pyruvate kinase isozymes M1/M2                  | OS=Homo sapiens GN=PKM2 PE=1 SV=4   |         |       |      |            |           |                      |                                          |             | 11                  | 1                  |  |  |
|             |          |       |               |       |     | 33       | 43          | 599.32                                          | 1196.62                             | 1196.64 | -0.02 | 0    | 54         | 0.0002778 | R.LDIDSPPIAR.N       |                                          | 19.7        |                     |                    |  |  |
|             |          |       |               |       |     | 44       | 56          | 680.34                                          | 1358.67                             | 1358.7  | -0.03 | 0    | 65         | 2.26E-05  | R.NGTIGTIGPASR.S     |                                          | 19.53       |                     |                    |  |  |
|             |          |       |               |       |     | 126      | 135         | 495.75                                          | 989.48                              | 989.5   | -0.02 | 0    | 56         | 0.0002101 | K.GSGTAEVELK.K       |                                          | 13.73       |                     |                    |  |  |
|             |          |       |               |       |     | 142      | 151         | 607.27                                          | 1212.53                             | 1212.57 | -0.04 | 0    | 38         | 0.0129072 | K.ITLDNAYMEK.C       | Oxidation (M)                            | 18.79       |                     |                    |  |  |
|             |          |       |               |       |     | 189      | 206         | 890.44                                          | 1778.86                             | 1778.87 | -0.01 | 0    | 74         | 2.20E-06  | K.GADFLVTEVGGSLGSK.K |                                          | 21.23       |                     |                    |  |  |
|             |          |       |               |       |     | 208      | 224         | 818.92                                          | 1635.83                             | 1635.88 | -0.05 | 0    | 63         | 3.26E-05  | K.GVNLPGAAVDLPVSEK.D |                                          | 20.62       |                     |                    |  |  |
|             |          |       |               |       |     | 295      | 305         | 571.29                                          | 1140.57                             | 1140.6  | -0.03 | 0    | 54         | 0.0002779 | R.GDLGIEIPAEK.V      |                                          | 20.05       |                     |                    |  |  |
|             |          |       |               |       |     | 423      | 433         | 611.3                                           | 1220.6                              | 1220.63 | -0.03 | 0    | 88         | 1.06E-07  | K.CCSGAIIVLTK.S      |                                          | 19.79       |                     |                    |  |  |
|             |          |       |               |       |     |          |             |                                                 |                                     |         |       |      |            |           |                      |                                          |             |                     |                    |  |  |
|             |          |       |               |       |     |          |             |                                                 |                                     |         |       |      |            |           |                      |                                          |             |                     |                    |  |  |
| P07237      | 17%      | 475   | 9             | 57480 | 4.8 | P07237   | PDIA1_HUMAN | Protein disulfide-isomerase                     | OS=Homo sapiens GN=P4HB PE=1 SV=3   |         |       |      |            |           |                      |                                          |             | 11                  | 2                  |  |  |
|             |          |       |               |       |     | 58       | 65          | 431.72                                          | 861.43                              | 861.46  | -0.03 | 0    | 43         | 0.004472  | K.ALALPEYAK.A        |                                          | 13.65       |                     |                    |  |  |
|             |          |       |               |       |     | 121      | 130         | 601.79                                          | 1201.56                             | 1201.6  | -0.03 | 0    | 53         | 0.0003706 | R.EADDIVNWLK.K       |                                          | 21.84       |                     |                    |  |  |
|             |          |       |               |       |     | 223      | 230         | 496.26                                          | 990.51                              | 990.54  | -0.03 | 0    | 42         | 0.0046646 | K.ENLLDFIK.H         |                                          | 22.28       |                     |                    |  |  |
|             |          |       |               |       |     | 277      | 283         | 377.17                                          | 752.33                              | 752.37  | -0.04 | 0    | 31         | 0.0481451 | K.TAAESFK.G          |                                          | 12.69       |                     |                    |  |  |
|             |          |       |               |       |     | 301      | 308         | 483.77                                          | 965.52                              | 965.56  | -0.03 | 0    | 42         | 0.0042697 | R.ILEFFGLK.K         |                                          | 22.23       |                     |                    |  |  |
|             |          |       |               |       |     | 317      | 326         | 611.8                                           | 1221.59                             | 1221.62 | -0.03 | 0    | 49         | 0.0009861 | R.LITTLEEMTK.Y       | Oxidation (M)                            | 19.09       |                     |                    |  |  |
|             |          |       |               |       |     | 327      | 338         | 484.56                                          | 1450.65                             | 1450.69 | -0.04 | 0    | 65         | 1.93E-05  | K.YKPESEELTAER.I     |                                          | 13.6        |                     |                    |  |  |
|             |          |       |               |       |     | 425      | 436         | 655.29                                          | 1308.56                             | 1308.59 | -0.03 | 0    | 100        | 7.15E-09  | K.MDSTANEVEAVK.V     | Oxidation (M)                            | 13.69       |                     |                    |  |  |
|             |          |       |               |       |     | 453      | 461         | 533.75                                          | 1065.48                             | 1065.51 | -0.03 | 0    | 50         | 0.0006524 | R.TVIDYNGER.T        |                                          | 14.95       |                     |                    |  |  |
| Q02818      | 11%      | 325   | 6             | 53846 | 5.2 | Q02818   | NUCB1_HUMAN | Nucleobindin-1                                  | OS=Homo sapiens GN=NUCB1 PE=1 SV=4  |         |       |      |            |           |                      |                                          |             | 11                  | 1                  |  |  |
|             |          |       |               |       |     | 72       | 81          | 536.77                                          | 1071.52                             | 1071.56 | -0.04 | 0    | 64         | 3.47E-05  | K.LQAANAEDIK.S       |                                          | 13.56       |                     |                    |  |  |
|             |          |       |               |       |     | 72       | 84          | 448.88                                          | 1343.63                             | 1343.7  | -0.07 | 1    | 48         | 0.0011443 | K.LQAANAEDIKSGK.L    |                                          | 12.87       |                     |                    |  |  |
|             |          |       |               |       |     | 219      | 229         | 570.81                                          | 1139.6                              | 1139.63 | -0.03 | 0    | 59         | 8.87E-05  | K.VNVPGSQAQLK.E      |                                          | 14.9        |                     |                    |  |  |
|             |          |       |               |       |     | 350      | 357         | 482.74                                          | 963.47                              | 963.47  | 0     | 0    | 47         | 0.0016564 | R.FEELAA.R           |                                          | 16          |                     |                    |  |  |
|             |          |       |               |       |     | 368      | 377         | 552.26                                          | 1102.51                             | 1102.56 | -0.05 | 0    | 72         | 5.17E-06  | R.LSQTEALGR.S        |                                          | 13.86       |                     |                    |  |  |
|             |          |       |               |       |     | 452      | 461         | 580.8                                           | 1159.58                             | 1159.62 | -0.04 | 0    | 35         | 0.0272451 | R.LPEVEVPQHL.-       |                                          | 20.45       |                     |                    |  |  |
| P31146      | 8%       | 198   | 3             | 51678 | 6.3 | P31146   | COR1A_HUMAN | Coronin-1A                                      | OS=Homo sapiens GN=CORO1A PE=1 SV=4 |         |       |      |            |           |                      |                                          |             | 11                  | 1                  |  |  |
|             |          |       |               |       |     | 384      | 393         | 513.8                                           | 1025.58                             | 1025.61 | -0.03 | 0    | 50         | 0.0006739 | R.DAGPLLSLK.D        |                                          | 21.32       |                     |                    |  |  |
|             |          |       |               |       |     | 417      | 432         | 751.84                                          | 1501.67                             | 1501.7  | -0.03 | 0    | 72         | 4.27E-06  | R.AAPEASGTPSSDAVSR.L |                                          | 12.82       |                     |                    |  |  |
|             |          |       |               |       |     | 440      | 449         | 579.31                                          | 1156.6                              | 1156.65 | -0.04 | 0    | 45         | 0.0023754 | K.LQATVQLQK.R        |                                          | 15.96       |                     |                    |  |  |
| Q99832      | 5%       | 141   | 3             | 59842 | 7.5 | Q99832   | TCPH_HUMAN  | T-complex protein 1 subunit eta                 | OS=Homo sapiens GN=CCT7 PE=1 SV=2   |         |       |      |            |           |                      |                                          |             | 11                  | 1                  |  |  |
|             |          |       |               |       |     | 1        | 10          | 608.82                                          | 1215.63                             | 1215.66 | -0.03 | 0    | 39         | 0.0092664 | -.MMPTPVILLK.E       | Acetyl (Protein N-term); 2 Oxidation (M) | 21.49       |                     |                    |  |  |
|             |          |       |               |       |     | 431      | 440         | 552.81                                          | 1103.61                             | 1103.63 | -0.03 | 0    | 60         | 7.73E-05  | K.QQLLIGAYAK.A       |                                          | 19.88       |                     |                    |  |  |
|             |          |       |               |       |     | 441      | 447         | 406.24                                          | 810.47                              | 810.5   | -0.03 | 0    | 41         | 0.0045058 | K.ALEIIPR.Q          |                                          | 19.75       |                     |                    |  |  |
| accession # | coverage | score | stinct peptid | mass  | pl  | start AA | end AA      | m/z obs                                         | M obs                               | M calc  | delta | miss | pept score | exp val   | peptide              | modifications                            | retent time | Strongest gel slice | # gel slices found |  |  |

| accession # | coverage | score | stinct peptid | mass  | pl  | start AA           | end AA                                                                               | m/z obs | M obs | M calc  | delta   | miss    | pept score | exp val | peptide | modifications                     | retent time              | Strongest gel slice | # gel slices found |
|-------------|----------|-------|---------------|-------|-----|--------------------|--------------------------------------------------------------------------------------|---------|-------|---------|---------|---------|------------|---------|---------|-----------------------------------|--------------------------|---------------------|--------------------|
| P10809      | 3%       | 94    | 2             | 61187 | 5.7 | P10809 CH60_HUMAN  | 60 kDa heat shock protein, mitochondrial OS=Homo sapiens GN=HSPD1 PE=1 SV=2          | 397     | 405   | 451.26  | 900.5   | 900.53  | -0.03      | 0       | 46      | 0.0025715 K.LSDGVAVLK.V           |                          | 11                  | 1                  |
|             |          |       |               |       |     |                    |                                                                                      | 421     | 429   | 480.75  | 959.49  | 959.5   | -0.02      | 0       | 49      | 0.0012825 R.VTDALNATR.A           |                          | 18.75               |                    |
|             |          |       |               |       |     |                    |                                                                                      |         |       |         |         |         |            |         |         |                                   |                          | 13.3                |                    |
| accession # | coverage | score | stinct peptid | mass  | pl  | start AA           | end AA                                                                               | m/z obs | M obs | M calc  | delta   | miss    | pept score | exp val | peptide | modifications                     | retent time              | Strongest gel slice | # gel slices found |
| P50991      | 3%       | 72    | 2             | 58401 | 8   | P50991 TCPD_HUMAN  | T-complex protein 1 subunit delta OS=Homo sapiens GN=CCT4 PE=1 SV=4                  | 35      | 42    | 419.2   | 836.39  | 836.44  | -0.05      | 0       | 33      | 0.0354469 R.FSNISA.AA.K           |                          | 11                  | 1                  |
|             |          |       |               |       |     |                    |                                                                                      | 532     | 539   | 466.23  | 930.44  | 930.48  | -0.03      | 0       | 40      | 0.0096358 K.IDDVVNT.R.-           |                          | 13.13               |                    |
|             |          |       |               |       |     |                    |                                                                                      |         |       |         |         |         |            |         |         |                                   |                          | 13.78               |                    |
| accession # | coverage | score | stinct peptid | mass  | pl  | start AA           | end AA                                                                               | m/z obs | M obs | M calc  | delta   | miss    | pept score | exp val | peptide | modifications                     | retent time              | Strongest gel slice | # gel slices found |
| P07437      | 30%      | 636   | 12            | 50095 | 4.8 | P07437 TBB5_HUMAN  | Tubulin beta chain OS=Homo sapiens GN=TUBB PE=1 SV=2                                 | 3       | 19    | 608.28  | 1821.83 | 1821.92 | -0.09      | 0       | 58      | 0.0001141 R.EIVHIQAGCCNQIGAK.F    |                          | 12                  | 2                  |
|             |          |       |               |       |     |                    |                                                                                      | 47      | 58    | 651.31  | 1300.61 | 1300.63 | -0.02      | 0       | 57      | 0.0001577 R.ISVYYNEATGGK.Y        |                          | 17.35               |                    |
|             |          |       |               |       |     |                    |                                                                                      | 63      | 77    | 816.41  | 1630.8  | 1630.82 | -0.03      | 0       | 49      | 0.0007771 R.AILVDLEPMTMDSVR.S     | Oxidation (M)            | 18.96               |                    |
|             |          |       |               |       |     |                    |                                                                                      | 242     | 251   | 565.79  | 1129.56 | 1129.59 | -0.02      | 0       | 55      | 0.000263 R.FPGQLNADLR.K           |                          | 20.65               |                    |
|             |          |       |               |       |     |                    |                                                                                      | 253     | 262   | 580.31  | 1158.6  | 1158.62 | -0.02      | 0       | 65      | 2.50E-05 K.LAVNMVPPFR.L           | Oxidation (M)            | 19.8                |                    |
|             |          |       |               |       |     |                    |                                                                                      | 283     | 297   | 830.46  | 1658.9  | 1658.89 | 0.01       | 0       | 40      | 0.0058378 R.ALTVPQLTQQVFDK.N      |                          | 20.16               |                    |
|             |          |       |               |       |     |                    |                                                                                      | 298     | 306   | 549.2   | 1096.38 | 1096.41 | -0.03      | 0       | 33      | 0.0278908 K.NMMAACDPR.H           | 2 Oxidation (M)          | 21.97               |                    |
|             |          |       |               |       |     |                    |                                                                                      | 310     | 318   | 520.29  | 1038.56 | 1038.59 | -0.02      | 0       | 60      | 7.53E-05 R.YLTVAAVFR.G            |                          | 12.03               |                    |
|             |          |       |               |       |     |                    |                                                                                      | 321     | 336   | 657.95  | 1970.82 | 1970.87 | -0.05      | 1       | 54      | 0.0002453 R.MSMKEVDEQMLNVQNK.N    | 3 Oxidation (M)          | 21.22               |                    |
|             |          |       |               |       |     |                    |                                                                                      | 325     | 336   | 731.83  | 1461.65 | 1461.68 | -0.03      | 0       | 70      | 6.17E-06 K.EVDEQMLNVQNK.N         | Oxidation (M)            | 13.25               |                    |
|             |          |       |               |       |     |                    |                                                                                      | 351     | 359   | 514.75  | 1027.49 | 1027.51 | -0.02      | 0       | 53      | 0.0003845 K.TAVCDIPPR.G           |                          | 14.13               |                    |
|             |          |       |               |       |     |                    |                                                                                      | 381     | 390   | 623.28  | 1244.56 | 1244.59 | -0.03      | 0       | 42      | 0.0051834 R.ISEQFTAMFR.R          | Oxidation (M)            | 13.74               |                    |
|             |          |       |               |       |     |                    |                                                                                      |         |       |         |         |         |            |         |         |                                   |                          | 20.03               |                    |
| accession # | coverage | score | stinct peptid | mass  | pl  | start AA           | end AA                                                                               | m/z obs | M obs | M calc  | delta   | miss    | pept score | exp val | peptide | modifications                     | retent time              | Strongest gel slice | # gel slices found |
| P68371      | 27%      | 585   | 11            | 50255 | 4.8 | P68371 TBB2C_HUMAN | Tubulin beta-2C chain OS=Homo sapiens GN=TUBB2C PE=1 SV=1                            | 3       | 19    | 608.28  | 1821.83 | 1821.92 | -0.09      | 0       | 58      | 0.0001141 R.EIVHLQAGCCNQIGAK.F    |                          | 12                  | 2                  |
|             |          |       |               |       |     |                    |                                                                                      | 63      | 77    | 809.39  | 1616.77 | 1616.81 | -0.03      | 0       | 53      | 0.0003697 R.AVLVDLEPMTMDSVR.S     | Oxidation (M)            | 17.35               |                    |
|             |          |       |               |       |     |                    |                                                                                      | 242     | 251   | 565.79  | 1129.56 | 1129.59 | -0.02      | 0       | 55      | 0.000263 R.FPGQLNADLR.K           |                          | 20.38               |                    |
|             |          |       |               |       |     |                    |                                                                                      | 253     | 262   | 580.31  | 1158.6  | 1158.62 | -0.02      | 0       | 65      | 2.50E-05 K.LAVNMVPPFR.L           | Oxidation (M)            | 19.8                |                    |
|             |          |       |               |       |     |                    |                                                                                      | 283     | 297   | 854.41  | 1706.81 | 1706.85 | -0.04      | 0       | 43      | 0.0032552 R.ALTVPQLTQQVFDK.N      | Oxidation (M)            | 20.16               |                    |
|             |          |       |               |       |     |                    |                                                                                      | 298     | 306   | 549.2   | 1096.38 | 1096.41 | -0.03      | 0       | 33      | 0.0278908 K.NMMAACDPR.H           | 2 Oxidation (M)          | 20.73               |                    |
|             |          |       |               |       |     |                    |                                                                                      | 310     | 318   | 520.29  | 1038.56 | 1038.59 | -0.02      | 0       | 60      | 7.53E-05 R.YLTVAAVFR.G            |                          | 12.03               |                    |
|             |          |       |               |       |     |                    |                                                                                      | 321     | 336   | 657.95  | 1970.82 | 1970.87 | -0.05      | 1       | 54      | 0.0002453 R.MSMKEVDEQMLNVQNK.N    | 3 Oxidation (M)          | 21.22               |                    |
|             |          |       |               |       |     |                    |                                                                                      | 325     | 336   | 731.83  | 1461.65 | 1461.68 | -0.03      | 0       | 70      | 6.17E-06 K.EVDEQMLNVQNK.N         | Oxidation (M)            | 13.25               |                    |
|             |          |       |               |       |     |                    |                                                                                      | 351     | 359   | 514.75  | 1027.49 | 1027.51 | -0.02      | 0       | 53      | 0.0003845 K.TAVCDIPPR.G           |                          | 14.13               |                    |
|             |          |       |               |       |     |                    |                                                                                      | 381     | 390   | 623.28  | 1244.56 | 1244.59 | -0.03      | 0       | 42      | 0.0051834 R.ISEQFTAMFR.R          | Oxidation (M)            | 13.74               |                    |
|             |          |       |               |       |     |                    |                                                                                      |         |       |         |         |         |            |         |         |                                   |                          | 20.03               |                    |
| accession # | coverage | score | stinct peptid | mass  | pl  | start AA           | end AA                                                                               | m/z obs | M obs | M calc  | delta   | miss    | pept score | exp val | peptide | modifications                     | retent time              | Strongest gel slice | # gel slices found |
| Q9BQE3      | 18%      | 422   | 7             | 50548 | 5   | Q9BQE3 TBA1C_HUMAN | Tubulin alpha-1C chain OS=Homo sapiens GN=TUBA1C PE=1 SV=1                           | 41      | 60    | 1004.45 | 2006.88 | 2006.89 | -0.01      | 0       | 124     | 2.54E-11 K.TIGGGDDSFNTFFSETGAGK.H |                          | 12                  | 2                  |
|             |          |       |               |       |     |                    |                                                                                      | 65      | 79    | 851.44  | 1700.87 | 1700.9  | -0.03      | 0       | 63      | 2.89E-05 R.AVFVDELPTVIDEVR.T      |                          | 21.62               |                    |
|             |          |       |               |       |     |                    |                                                                                      | 85      | 96    | 697.36  | 1392.72 | 1392.74 | -0.03      | 0       | 53      | 0.0003459 R.QLFHPEQLITGK.E        | Gln->pyro-Glu (N-term Q) | 22.01               |                    |
|             |          |       |               |       |     |                    |                                                                                      | 85      | 96    | 470.91  | 1409.72 | 1409.77 | -0.05      | 0       | 49      | 0.000804 R.QLFHPEQLITGK.E         |                          | 21.75               |                    |
|             |          |       |               |       |     |                    |                                                                                      | 113     | 121   | 543.3   | 1084.59 | 1084.61 | -0.02      | 0       | 87      | 1.77E-07 K.EIIDLVLDR.I            |                          | 20.34               |                    |
|             |          |       |               |       |     |                    |                                                                                      | 216     | 229   | 573.61  | 1171.82 | 1171.87 | -0.05      | 0       | 39      | 0.0073663 R.NLDIRPTYTNLNR.L       |                          | 21.88               |                    |
|             |          |       |               |       |     |                    |                                                                                      | 327     | 336   | 508.28  | 1014.55 | 1014.57 | -0.02      | 0       | 56      | 0.000198 K.DVNAAIATIK.T           |                          | 19.45               |                    |
|             |          |       |               |       |     |                    |                                                                                      |         |       |         |         |         |            |         |         |                                   |                          | 19.72               |                    |
| accession # | coverage | score | stinct peptid | mass  | pl  | start AA           | end AA                                                                               | m/z obs | M obs | M calc  | delta   | miss    | pept score | exp val | peptide | modifications                     | retent time              | Strongest gel slice | # gel slices found |
| P21281      | 16%      | 398   | 7             | 56807 | 5.6 | P21281 VATB2_HUMAN | Vacuolar ATP synthase subunit B, brain isoform OS=Homo sapiens GN=ATP6V1B2 PE=1 SV=3 | 30      | 37    | 437.23  | 872.45  | 872.47  | -0.03      | 0       | 33      | 0.0495683 R.EQALAVSR.N            |                          | 12                  | 2                  |
|             |          |       |               |       |     |                    |                                                                                      | 83      | 93    | 545.78  | 1089.55 | 1089.57 | -0.02      | 0       | 57      | 0.0001818 R.SGQVLVSVSGS.KA        |                          | 13.17               |                    |
|             |          |       |               |       |     |                    |                                                                                      | 94      | 108   | 760.89  | 1519.76 | 1519.79 | -0.03      | 0       | 109     | 9.62E-10 K.AVVQVFEGTSGIDAK.K      |                          | 13.69               |                    |
|             |          |       |               |       |     |                    |                                                                                      | 121     | 130   | 560.76  | 1119.5  | 1119.52 | -0.02      | 0       | 46      | 0.001889 R.TPVSEDMGLR.V           | Oxidation (M)            | 20.2                |                    |
|             |          |       |               |       |     |                    |                                                                                      | 387     | 400   | 798.94  | 1595.87 | 1595.9  | -0.03      | 0       | 47      | 0.0011433 R.QIYPPINVLPSLSR.L      |                          | 13.78               |                    |
|             |          |       |               |       |     |                    |                                                                                      | 461     | 471   | 654.81  | 1307.61 | 1307.63 | -0.01      | 0       | 38      | 0.0104875 R.NFIAQGPYENR.T         |                          | 21.84               |                    |
|             |          |       |               |       |     |                    |                                                                                      | 495     | 506   | 719.36  | 1436.71 | 1436.73 | -0.02      | 0       | 70      | 7.12E-06 R.IPQSTLSEFYPR.D         |                          | 19.32               |                    |
|             |          |       |               |       |     |                    |                                                                                      |         |       |         |         |         |            |         |         |                                   |                          | 20.78               |                    |
| accession # | coverage | score | stinct peptid | mass  | pl  | start AA           | end AA                                                                               | m/z obs | M obs | M calc  | delta   | miss    | pept score | exp val | peptide | modifications                     | retent time              | Strongest gel slice | # gel slices found |
| O43175      | 11%      | 286   | 5             | 57356 | 6.3 | O43175 SERA_HUMAN  | D-3-phosphoglycerate dehydrogenase OS=Homo sapiens GN=PHGDH PE=1 SV=4                | 59      | 69    | 565.79  | 1129.56 | 1129.6  | -0.03      | 0       | 60      | 8.20E-05 K.VTADVINAEEK.L          |                          | 12                  | 2                  |
|             |          |       |               |       |     |                    |                                                                                      | 76      | 90    | 744.85  | 1487.69 | 1487.72 | -0.03      | 0       | 62      | 4.04E-05 R.AGTGVDNVNLEAATR.K      |                          | 16.13               |                    |
|             |          |       |               |       |     |                    |                                                                                      | 147     | 155   | 450.27  | 898.53  | 898.56  | -0.03      | 0       | 46      | 0.0015957 K.TLGILGLGR.I           |                          | 19.4                |                    |
|             |          |       |               |       |     |                    |                                                                                      | 237     | 247   | 550.3   | 1098.59 | 1098.6  | -0.02      | 0       | 35      | 0.0227624 R.GGIVDEGALLR.A         |                          | 21.18               |                    |
|             |          |       |               |       |     |                    |                                                                                      | 385     | 394   | 536.27  | 1070.53 | 1070.57 | -0.04      | 0       | 82      | 4.94E-07 K.QADVNLVNAK.L           |                          | 20.29               |                    |
|             |          |       |               |       |     |                    |                                                                                      |         |       |         |         |         |            |         |         |                                   |                          | 14.44               |                    |
| accession # | coverage | score | stinct peptid | mass  | pl  | start AA           | end AA                                                                               | m/z obs | M obs | M calc  | delta   | miss    | pept score | exp val | peptide | modifications                     | retent time              | Strongest gel slice | # gel slices found |
| P25705      | 8%       | 229   | 4             | 59828 | 9.2 | P25705 ATPA_HUMAN  | ATP synthase subunit alpha, mitochondrial OS=Homo sapiens GN=ATP5A1 PE=1 SV=1        | 46      | 58    | 720.32  | 1438.62 | 1438.66 | -0.04      | 0       | 100     | 7.35E-09 K.TGTAEMSSLEER.I         | Oxidation (M)            | 12                  | 2                  |
|             |          |       |               |       |     |                    |                                                                                      | 74      | 83    | 500.78  | 999.55  | 999.57  | -0.02      | 0       | 36      | 0.0226724 R.VLSIGDGIAR.V          |                          | 17.96               |                    |
|             |          |       |               |       |     |                    |                                                                                      | 150     | 161   | 586.31  | 1170.6  | 1170.62 | -0.02      | 0       | 61      | 6.36E-05 R.VVDALGNADGK.G          |                          | 19.76               |                    |
|             |          |       |               |       |     |                    |                                                                                      | 195     | 204   | 513.79  | 1025.57 | 1025.59 | -0.02      | 0       | 34      | 0.0255611 K.AVDSLVPVIGR.G         |                          | 19.63               |                    |
|             |          |       |               |       |     |                    |                                                                                      |         |       |         |         |         |            |         |         |                                   |                          | 20.07               |                    |
| accession # | coverage | score | stinct peptid | mass  | pl  | start AA           | end AA                                                                               | m/z obs | M obs | M calc  | delta   | miss    | pept score | exp val | peptide | modifications                     | retent time              | Strongest gel slice | # gel slices found |
| P27797      | 7%       | 116   | 3             | 48283 | 4.3 | P27797 CALR_HUMAN  | Caietreticulin OS=Homo sapiens GN=CALR PE=1 SV=1                                     | 49      | 55    | 369.2   | 736.38  | 736.41  | -0.03      | 0       | 36      | 0.0181916 K.FVLLSSGK.F            |                          | 12                  | 1                  |
|             |          |       |               |       |     |                    |                                                                                      | 74      | 87    | 804.42  | 1606.83 | 1606.77 | 0.06       | 0       | 44      | 0.0024486 R.FYALSASFEPFSNK.G      |                          | 14.96               |                    |
|             |          |       |               |       |     |                    |                                                                                      | 279     | 286   | 496.73  | 991.44  | 991.46  | -0.02      | 0       | 36      | 0.0210671 R.QIDNPDYK.G            |                          | 21.93               |                    |
|             |          |       |               |       |     |                    |                                                                                      |         |       |         |         |         |            |         |         |                                   |                          | 12.9                |                    |

| accession # | coverage | score  | stinct peptid | mass    | pl    | start AA                                                            | end AA                              | m/z obs   | M obs           | M calc  | delta | miss | pept score | exp val   | peptide                           | modifications | retent time | Strongest gel slice | # gel slices found |                                        |       |    |    |  |  |  |
|-------------|----------|--------|---------------|---------|-------|---------------------------------------------------------------------|-------------------------------------|-----------|-----------------|---------|-------|------|------------|-----------|-----------------------------------|---------------|-------------|---------------------|--------------------|----------------------------------------|-------|----|----|--|--|--|
| P78371      | 4%       | 141    | 2             | 57794   | 6     | start AA                                                            | end AA                              | m/z obs   | M obs           | M calc  | delta | miss | pept score | exp val   | peptide                           | modifications | retent time | Strongest gel slice | # gel slices found |                                        |       |    |    |  |  |  |
|             |          |        |               |         |       | P78371 TCPB_HUMAN T-complex protein 1 subunit beta                  | OS=Homo sapiens GN=CCT2 PE=1 SV=4   |           |                 |         |       |      |            |           |                                   |               |             |                     |                    |                                        |       |    |    |  |  |  |
|             |          |        |               |         |       | 237                                                                 | 248                                 | 654.33    | 1306.65         | 1306.64 | 0     | 0    | 51         | 0.0005493 | K.LILIANTGMDTDK.I                 |               |             |                     |                    | Oxidation (M)                          | 15.7  | 12 | 1  |  |  |  |
|             |          |        |               |         |       | 377                                                                 | 388                                 | 665.82    | 1329.63         | 1329.65 | -0.03 | 0    | 57         | 0.0001414 | R.GATQQILDEAER.S                  |               |             |                     |                    |                                        | 19.54 |    |    |  |  |  |
| P13667      | 4%       | 93     | 2             | 73229   | 5     | start AA                                                            | end AA                              | m/z obs   | M obs           | M calc  | delta | miss | pept score | exp val   | peptide                           | modifications | retent time | Strongest gel slice | # gel slices found |                                        |       |    |    |  |  |  |
|             |          |        |               |         |       | P13667 PDI4_HUMAN Protein disulfide-isomerase A4                    | OS=Homo sapiens GN=PDI4 PE=1 SV=2   |           |                 |         |       |      |            |           |                                   |               |             |                     |                    |                                        |       |    |    |  |  |  |
|             |          |        |               |         |       | 235                                                                 | 245                                 | 567.27    | 1132.53         | 1132.56 | -0.03 | 0    | 51         | 0.0006518 | K.VDATAETDLAK.R                   |               |             |                     |                    |                                        | 14.39 |    |    |  |  |  |
|             |          |        |               |         |       | 350                                                                 | 362                                 | 729.9     | 1457.78         | 1457.75 | 0.03  | 0    | 42         | 0.0044928 | K.VSQGQLVVMQPEK.F                 |               |             |                     |                    | Oxidation (M)                          | 15.18 |    |    |  |  |  |
| P06733      | 15%      | 295    | 6             | 47481   | 7     | start AA                                                            | end AA                              | m/z obs   | M obs           | M calc  | delta | miss | pept score | exp val   | peptide                           | modifications | retent time | Strongest gel slice | # gel slices found |                                        |       |    |    |  |  |  |
|             |          |        |               |         |       | P06733 ENOA_HUMAN Alpha-enolase                                     | OS=Homo sapiens GN=ENO1 PE=1 SV=2   |           |                 |         |       |      |            |           |                                   |               |             |                     |                    |                                        |       |    |    |  |  |  |
|             |          |        |               |         |       | 16                                                                  | 28                                  | 703.84    | 1405.67         | 1405.71 | -0.04 | 0    | 59         | 8.99E-05  | R.GNPTVEVDLFTSK.G                 |               |             |                     |                    |                                        | 20.79 | 13 | 1  |  |  |  |
|             |          |        |               |         |       | 93                                                                  | 103                                 | 656.77    | 1311.53         | 1311.57 | -0.04 | 0    | 48         | 0.0010938 | K.LMIEMDGTENK.S                   |               |             |                     |                    | 2 Oxidation (M)                        | 13.74 |    |    |  |  |  |
|             |          |        |               |         |       | 222                                                                 | 228                                 | 401.23    | 800.44          | 800.46  | -0.03 | 0    | 45         | 0.0028973 | K.EGLELLK.T                       |               |             |                     |                    |                                        | 20.18 |    |    |  |  |  |
|             |          |        |               |         |       | 240                                                                 | 253                                 | 778.87    | 1555.72         | 1555.77 | -0.05 | 0    | 57         | 0.0001371 | K.VVIGMDVAASEFFR.S                |               |             |                     |                    | Oxidation (M)                          | 21.4  |    |    |  |  |  |
| Q15084      | 12%      | 192    | 4             | 48490   | 5     | start AA                                                            | end AA                              | m/z obs   | M obs           | M calc  | delta | miss | pept score | exp val   | peptide                           | modifications | retent time | Strongest gel slice | # gel slices found |                                        |       |    |    |  |  |  |
|             |          |        |               |         |       | Q15084 PDI6_HUMAN Protein disulfide-isomerase A6                    | OS=Homo sapiens GN=PDI6 PE=1 SV=1   |           |                 |         |       |      |            |           |                                   |               |             |                     |                    |                                        |       |    |    |  |  |  |
|             |          |        |               |         |       | 68                                                                  | 77                                  | 508.29    | 1014.57         | 1014.61 | -0.04 | 1    | 62         | 5.25E-05  | K.AATALKDQVVK.V                   |               |             |                     |                    |                                        | 13.52 | 13 | 1  |  |  |  |
|             |          |        |               |         |       | 217                                                                 | 231                                 | 764.39    | 1526.76         | 1526.84 | -0.08 | 0    | 43         | 0.0029461 | K.LAAVDATVNVQLASR.Y               |               |             |                     |                    |                                        | 21.01 |    |    |  |  |  |
|             |          |        |               |         |       | 314                                                                 | 322                                 | 539.79    | 1077.57         | 1077.61 | -0.04 | 0    | 53         | 0.000379  | R.NSYLEVLLK.L                     |               |             |                     |                    |                                        | 21.62 |    |    |  |  |  |
|             |          |        |               |         |       | 393                                                                 | 409                                 | 808.41    | 1614.81         | 1614.84 | -0.02 | 0    | 33         | 0.0327681 | R.GSTAPVGGGAFPTIVER.E             |               |             |                     |                    |                                        | 20.4  |    |    |  |  |  |
| P61158      | 10%      | 154    | 4             | 47797   | 5.6   | start AA                                                            | end AA                              | m/z obs   | M obs           | M calc  | delta | miss | pept score | exp val   | peptide                           | modifications | retent time | Strongest gel slice | # gel slices found |                                        |       |    |    |  |  |  |
|             |          |        |               |         |       | P61158 ARP3_HUMAN Actin-related protein 3                           | OS=Homo sapiens GN=ACTR3 PE=1 SV=3  |           |                 |         |       |      |            |           |                                   |               |             |                     |                    |                                        |       |    |    |  |  |  |
|             |          |        |               |         |       | 255                                                                 | 264                                 | 547.77    | 1093.53         | 1093.58 | -0.04 | 0    | 39         | 0.0086144 | K.QYTGINAISK.K                    |               |             |                     |                    |                                        | 16.35 | 13 | 1  |  |  |  |
|             |          |        |               |         |       | 318                                                                 | 329                                 | 649.32    | 1296.63         | 1296.65 | -0.02 | 0    | 39         | 0.0072648 | K.NIVLSGGSTMFRL.D                 |               |             |                     |                    | Oxidation (M)                          | 19.75 |    |    |  |  |  |
| P08962      | 8%       | 140    | 3             | 26474   | 8.1   | start AA                                                            | end AA                              | m/z obs   | M obs           | M calc  | delta | miss | pept score | exp val   | peptide                           | modifications | retent time | Strongest gel slice | # gel slices found |                                        |       |    |    |  |  |  |
|             |          |        |               |         |       | P08962 CD63_HUMAN CD63 antigen                                      | OS=Homo sapiens GN=CD63 PE=1 SV=2   |           |                 |         |       |      |            |           |                                   |               |             |                     |                    |                                        |       |    |    |  |  |  |
|             |          |        |               |         |       | 109                                                                 | 120                                 | 506.23    | 1515.66         | 1515.68 | -0.02 | 1    | 33         | 0.0408541 | R.DKVMSEFNNNFR.Q                  |               |             |                     |                    | Oxidation (M)                          | 18.57 | 13 | 16 |  |  |  |
|             |          |        |               |         |       | 111                                                                 | 120                                 | 637.29    | 1272.56         | 1272.56 | 0.01  | 0    | 72         | 4.85E-06  | K.VMSEFNNNFR.Q                    |               |             |                     |                    | Oxidation (M)                          | 18.27 |    |    |  |  |  |
| P52209      | 8%       | 166    | 3             | 53619   | 6.8   | start AA                                                            | end AA                              | m/z obs   | M obs           | M calc  | delta | miss | pept score | exp val   | peptide                           | modifications | retent time | Strongest gel slice | # gel slices found |                                        |       |    |    |  |  |  |
|             |          |        |               |         |       | P52209 6PGD_HUMAN 6-phosphogluconate dehydrogenase, decarboxylating | OS=Homo sapiens GN=6PGD PE=1 SV=3   |           |                 |         |       |      |            |           |                                   |               |             |                     |                    |                                        |       |    |    |  |  |  |
|             |          |        |               |         |       | 39                                                                  | 48                                  | 561.26    | 1120.51         | 1120.54 | -0.03 | 0    | 42         | 0.0048773 | K.VDDFLANEAK.G                    |               |             |                     |                    |                                        | 19.62 | 13 | 1  |  |  |  |
|             |          |        |               |         |       | 77                                                                  | 87                                  | 596.79    | 1191.57         | 1191.58 | -0.01 | 0    | 66         | 2.01E-05  | K.AGQAVDDFIEK.L                   |               |             |                     |                    |                                        | 19.57 |    |    |  |  |  |
| Q5VTE0      | 7%       | 178    | 3             | 50495   | 9.2   | start AA                                                            | end AA                              | m/z obs   | M obs           | M calc  | delta | miss | pept score | exp val   | peptide                           | modifications | retent time | Strongest gel slice | # gel slices found |                                        |       |    |    |  |  |  |
|             |          |        |               |         |       | Q5VTE0 EF1A3_HUMAN Putative elongation factor 1-alpha-like 3        | OS=Homo sapiens GN=EEF1A3 PE=5 SV=1 |           |                 |         |       |      |            |           |                                   |               |             |                     |                    |                                        |       |    |    |  |  |  |
|             |          |        |               |         |       | 135                                                                 | 146                                 | 438.9     | 1313.68         | 1313.73 | -0.05 | 0    | 44         | 0.0027344 | R.EHALLAYTLGVK.Q                  |               |             |                     |                    |                                        | 20.27 | 13 | 26 |  |  |  |
|             |          |        |               |         |       | 256                                                                 | 266                                 | 513.3     | 1024.58         | 1024.6  | -0.02 | 0    | 71         | 4.84E-06  | K.IGGIGTVPVGR.V                   |               |             |                     |                    |                                        | 19.27 |    |    |  |  |  |
| P50395      | 7%       | 163    | 3             | 51087   | 6.1   | start AA                                                            | end AA                              | m/z obs   | M obs           | M calc  | delta | miss | pept score | exp val   | peptide                           | modifications | retent time | Strongest gel slice | # gel slices found |                                        |       |    |    |  |  |  |
|             |          |        |               |         |       | P50395 GDI2_HUMAN Rab GDP dissociation inhibitor beta               | OS=Homo sapiens GN=GDI2 PE=1 SV=2   |           |                 |         |       |      |            |           |                                   |               |             |                     |                    |                                        |       |    |    |  |  |  |
|             |          |        |               |         |       | 80                                                                  | 89                                  | 568.79    | 1135.57         | 1135.61 | -0.04 | 0    | 37         | 0.0131312 | K.FLMANGQLVK.M                    |               |             |                     |                    | Oxidation (M)                          | 19.22 | 13 | 1  |  |  |  |
|             |          |        |               |         |       | 211                                                                 | 218                                 | 469.74    | 937.46          | 937.49  | -0.03 | 0    | 48         | 0.0009106 | K.LYSESLAR.Y                      |               |             |                     |                    |                                        | 14.73 |    |    |  |  |  |
| Q16181      | 4%       | 79     | 2             | 50933   | 8.8   | start AA                                                            | end AA                              | m/z obs   | M obs           | M calc  | delta | miss | pept score | exp val   | peptide                           | modifications | retent time | Strongest gel slice | # gel slices found |                                        |       |    |    |  |  |  |
|             |          |        |               |         |       | Q16181 SEPT7_HUMAN Septin-7                                         | OS=Homo sapiens GN=SEPT7 PE=1 SV=2  |           |                 |         |       |      |            |           |                                   |               |             |                     |                    |                                        |       |    |    |  |  |  |
|             |          |        |               |         |       | 187                                                                 | 195                                 | 490.82    | 979.62          | 979.64  | -0.02 | 0    | 39         | 0.0091037 | K.VNIPLIAK.A                      |               |             |                     |                    |                                        | 21.18 | 13 | 1  |  |  |  |
|             |          |        |               |         |       | 417                                                                 | 425                                 | 537.76    | 1073.5          | 1073.55 | -0.05 | 0    | 40         | 0.0087055 | R.ILEQQNSSR.T                     |               |             |                     |                    |                                        | 12.44 |    |    |  |  |  |
| P80723      | 29%      | 129    | 3             | 22680   | 4.6   | start AA                                                            | end AA                              | m/z obs   | M obs           | M calc  | delta | miss | pept score | exp val   | peptide                           | modifications | retent time | Strongest gel slice | # gel slices found |                                        |       |    |    |  |  |  |
|             |          |        |               |         |       | P80723 BASP_HUMAN Brain acid soluble protein 1                      | OS=Homo sapiens GN=BASP1 PE=1 SV=2  |           |                 |         |       |      |            |           |                                   |               |             |                     |                    |                                        |       |    |    |  |  |  |
|             |          |        |               |         |       | 98                                                                  | 121                                 | 766.69    | 2297.04         | 2297.13 | -0.09 | 1    | 43         | 0.0025406 | K.AEPPKAPQEQAAPGPAAGGEAPK.A       |               |             |                     |                    |                                        | 12.27 | 14 | 2  |  |  |  |
|             |          |        |               |         |       | 122                                                                 | 149                                 | 879.39    | 2635.13         | 2635.22 | -0.09 | 1    | 47         | 0.0010041 | K.AAEAAAAPAEAAAPAAAGEEPSKEEGEPK.K |               |             |                     |                    |                                        | 12.4  |    |    |  |  |  |
| Q01518      | 28%      | 799    | 13            | 52222   | 8.3   | start AA                                                            | end AA                              | m/z obs   | M obs           | M calc  | delta | miss | pept score | exp val   | peptide                           | modifications | retent time | Strongest gel slice | # gel slices found |                                        |       |    |    |  |  |  |
|             |          |        |               |         |       | Q01518 CAP1_HUMAN Adenylyl cyclase-associated protein 1             | OS=Homo sapiens GN=CAP1 PE=1 SV=4   |           |                 |         |       |      |            |           |                                   |               |             |                     |                    |                                        |       |    |    |  |  |  |
|             |          |        |               |         |       | 2                                                                   | 10                                  | 567.25    | 1132.49         | 1132.52 | -0.03 | 0    | 64         | 3.24E-05  | M.ADMQNLVER.L                     |               |             |                     |                    | Acetyl (Protein N-term); Oxidation (M) | 13.55 | 14 | 12 |  |  |  |
|             |          |        |               |         |       | 72                                                                  | 84                                  | 384.92    | 1535.67         | 1535.79 | -0.12 | 1    | 41         | 0.0056308 | K.HAEMVHTGLKLER.A                 |               |             |                     |                    | Oxidation (M)                          | 12.09 |    |    |  |  |  |
|             |          |        |               |         |       | 85                                                                  | 100                                 | 879.42    | 1756.82         | 1756.88 | -0.06 | 0    | 94         | 2.55E-08  | R.ALLVTASQQQPAENK.L               |               |             |                     |                    |                                        | 13.29 |    |    |  |  |  |
|             |          |        |               |         |       | 101                                                                 | 113                                 | 713.89    | 1425.76         | 1425.81 | -0.05 | 0    | 60         | 6.45E-05  | K.LSDLLAPISEQIK.E                 |               |             |                     |                    |                                        | 20.84 |    |    |  |  |  |
|             |          |        |               |         |       | 156                                                                 | 167                                 | 747.78    | 1493.55         | 1493.59 | -0.04 | 0    | 77         | 1.31E-06  | K.EMNDAAAMFYTNR.V                 |               |             |                     |                    | 2 Oxidation (M)                        | 13.46 |    |    |  |  |  |
|             |          |        |               |         |       | 295                                                                 | 312                                 | 460.22    | 1836.87         | 1836.97 | -0.11 | 0    | 62         | 3.98E-05  | R.SGPKPFSAPKPTQSPSPK.R            |               |             |                     |                    |                                        | 12.14 |    |    |  |  |  |
|             |          |        |               |         |       | 314                                                                 | 327                                 | 504.93    | 1511.78         | 1511.86 | -0.08 | 2    | 54         | 0.0002493 | R.ATKKEPAVLELEGK.K                |               |             |                     |                    |                                        | 12.84 |    |    |  |  |  |
|             |          |        |               |         |       | 317                                                                 | 327                                 | 404.88    | 1211.62         | 1211.68 | -0.06 | 1    | 53         | 0.000379  | K.KEPAVLELEGK.K                   |               |             |                     |                    |                                        | 13.69 |    |    |  |  |  |
| 317         | 328      | 447.58 | 1339.71       | 1339.77 | -0.07 | 2                                                                   | 57                                  | 0.0001537 | K.KEPAVLELEGK.W |         | 12.8  |      |            |           |                                   |               |             |                     |                    |                                        |       |    |    |  |  |  |





| accession # | coverage | score | stinct peptid | mass  | pl  | start AA | end AA | m/z obs | M obs   | M calc  | delta | miss | pept score | exp val   | peptide               | modifications | retent time | Strongest gel slice | # gel slices found |  |
|-------------|----------|-------|---------------|-------|-----|----------|--------|---------|---------|---------|-------|------|------------|-----------|-----------------------|---------------|-------------|---------------------|--------------------|--|
|             |          |       |               |       |     | 354      | 361    | 460.72  | 919.43  | 919.47  | -0.03 | 0    | 38         | 0.0114164 | K.ALMDDEVVKA          | Oxidation (M) |             | 13.9                |                    |  |
| P06576      | 7%       | 133   | 3             | 56525 | 5.3 | 189      | 198    | 544.81  | 1087.6  | 1087.63 | -0.03 | 0    | 35         | 0.0272099 | K.VVDLLAPYAK.G        |               | 20.97       | 15                  | 1                  |  |
|             |          |       |               |       |     | 213      | 225    | 737.4   | 1472.79 | 1472.83 | -0.04 | 0    | 35         | 0.0241314 | K.TVLIIMELINNVAK.A    | Oxidation (M) |             | 22.51               |                    |  |
|             |          |       |               |       |     | 265      | 279    | 809.38  | 1616.75 | 1616.8  | -0.04 | 0    | 63         | 2.98E-05  | K.VALVYGMNEPPGAR.A    | Oxidation (M) |             | 19.29               |                    |  |
| O94766      | 6%       | 88    | 2             | 37270 | 8.4 | 96       | 105    | 557.32  | 1112.62 | 1112.66 | -0.04 | 0    | 35         | 0.0241567 | R.LSQTLSLVPR.L        |               | 20.22       | 15                  | 3                  |  |
|             |          |       |               |       |     | 226      | 235    | 566.76  | 1131.5  | 1131.53 | -0.03 | 0    | 53         | 0.0003511 | R.FEGPQVQDGR.V        |               | 14.16       |                     |                    |  |
| P08670      | 5%       | 89    | 2             | 53676 | 5.1 | 101      | 113    | 529.92  | 1586.74 | 1586.79 | -0.05 | 1    | 35         | 0.0221355 | R.TNEKVELQELNDR.F     |               | 16.99       | 15                  | 2                  |  |
|             |          |       |               |       |     | 295      | 304    | 547.25  | 1092.49 | 1092.52 | -0.03 | 0    | 54         | 0.0002643 | K.FADLSEAAANR.N       |               | 17.51       |                     |                    |  |
| P04075      | 30%      | 746   | 12 (14)       | 39851 | 8.3 | 2        | 13     | 717.87  | 1433.72 | 1433.72 | 0     | 0    | 45         | 0.0022361 | M.PYQYPALTPPEQK.K     |               | 19.37       | 16                  | 3                  |  |
|             |          |       |               |       |     | 2        | 14     | 521.6   | 1561.78 | 1561.81 | -0.04 | 1    | 57         | 0.0001203 | M.PYQYPALTPPEQK.E     |               | 18.2        |                     |                    |  |
|             |          |       |               |       |     | 15       | 22     | 470.73  | 939.45  | 939.48  | -0.03 | 0    | 60         | 6.96E-05  | K.ELSDIAHR.I          |               | 13.25       |                     |                    |  |
|             |          |       |               |       |     | 29       | 42     | 666.84  | 1331.66 | 1331.69 | -0.03 | 0    | 71         | 6.07E-06  | K.GILAADESTGSIAR.R    |               | 18.98       |                     |                    |  |
|             |          |       |               |       |     | 29       | 43     | 496.92  | 1487.74 | 1487.79 | -0.05 | 1    | 48         | 0.0011881 | K.GILAADESTGSIAR.L    |               | 16.63       |                     |                    |  |
|             |          |       |               |       |     | 43       | 57     | 601.62  | 1801.84 | 1801.9  | -0.06 | 2    | 33         | 0.0317734 | K.RLQSIGTENTENRR.F    |               | 12.43       |                     |                    |  |
|             |          |       |               |       |     | 44       | 56     | 745.85  | 1489.68 | 1489.7  | -0.02 | 0    | 77         | 1.58E-06  | R.LQSIGTENTENRR.R     |               | 13.51       |                     |                    |  |
|             |          |       |               |       |     | 44       | 57     | 549.59  | 1645.75 | 1645.8  | -0.05 | 1    | 37         | 0.0151725 | R.LQSIGTENTENRR.F     |               | 12.78       |                     |                    |  |
|             |          |       |               |       |     | 61       | 69     | 522.78  | 1043.55 | 1043.56 | -0.01 | 0    | 54         | 0.0003141 | R.QLLLTADDR.V         |               | 19.33       |                     |                    |  |
|             |          |       |               |       |     | 88       | 99     | 448.23  | 1341.66 | 1341.7  | -0.05 | 0    | 34         | 0.0295688 | K.ADDGRPPQVIK.S       |               | 19.11       |                     |                    |  |
|             |          |       |               |       |     | 100      | 111    | 396.23  | 1185.67 | 1185.71 | -0.04 | 2    | 33         | 0.037803  | K.SKGGVVGKVDK.G       |               | 12.65       |                     |                    |  |
|             |          |       |               |       |     | 141      | 147    | 362.15  | 722.29  | 722.32  | -0.03 | 0    | 32         | 0.0417081 | K.DGDAFAK.W           |               | 13.12       |                     |                    |  |
|             |          |       |               |       |     | 305      | 312    | 401.23  | 800.45  | 800.48  | -0.03 | 0    | 44         | 0.0043551 | R.ALQASALK.A          |               | 13.38       |                     |                    |  |
|             |          |       |               |       |     | 332      | 342    | 566.77  | 1131.52 | 1131.57 | -0.05 | 0    | 92         | 4.61E-08  | R.ALANSLACQGK.Y       |               | 13.94       |                     |                    |  |
| P40121      | 22%      | 373   | 6             | 38779 | 5.9 | 116      | 127    | 451.21  | 1350.6  | 1350.62 | -0.02 | 0    | 37         | 0.0132507 | K.YOEGGVESAFHK.T      |               | 14.9        | 16                  | 1                  |  |
|             |          |       |               |       |     | 232      | 243    | 659.3   | 1316.58 | 1316.57 | 0.01  | 0    | 41         | 0.0062918 | K.EGNPEEDLTADK.A      |               | 15.2        |                     |                    |  |
|             |          |       |               |       |     | 244      | 253    | 510.77  | 1019.52 | 1019.54 | -0.02 | 0    | 87         | 1.85E-07  | K.ANAQAALYK.V         |               | 13.64       |                     |                    |  |
|             |          |       |               |       |     | 254      | 265    | 640.79  | 1279.57 | 1279.61 | -0.03 | 0    | 87         | 1.34E-07  | K.VSDATGMNLT.K.V      | Oxidation (M) |             | 12.52               |                    |  |
|             |          |       |               |       |     | 307      | 319    | 695.35  | 1388.69 | 1388.74 | -0.05 | 0    | 53         | 0.0003569 | R.QAALQVAEFGISR.M     |               | 21.06       |                     |                    |  |
|             |          |       |               |       |     | 320      | 335    | 930.97  | 1859.92 | 1859.92 | 0     | 0    | 69         | 8.67E-06  | R.MQYAPNTQVEILPQGR.E  | Oxidation (M) |             | 19.72               |                    |  |
| P08865      | 13%      | 162   | 3             | 32947 | 4.8 | 64       | 80     | 870.93  | 1739.85 | 1739.94 | -0.09 | 0    | 58         | 9.24E-05  | R.AIVAIENPADVSVISSR.N |               | 20.63       | 16                  | 1                  |  |
|             |          |       |               |       |     | 90       | 102    | 602.32  | 1202.62 | 1202.64 | -0.02 | 0    | 65         | 2.53E-05  | K.FAAATGATPIAGR.F     |               | 16.4        |                     |                    |  |
|             |          |       |               |       |     | 121      | 128    | 456.76  | 911.51  | 911.54  | -0.03 | 0    | 39         | 0.008211  | R.LLLVTDPR.A          |               | 19.07       |                     |                    |  |
| P36222      | 6%       | 84    | 2             | 42998 | 8.7 | 171      | 182    | 586.34  | 1170.66 | 1170.7  | -0.04 | 0    | 39         | 0.009827  | K.QLLLSAALSAGK.V      |               | 20.89       | 16                  | 1                  |  |
|             |          |       |               |       |     | 183      | 193    | 606.3   | 1210.59 | 1210.61 | -0.01 | 0    | 45         | 0.0023658 | K.VTIDSSYDIK.I        |               | 19.28       |                     |                    |  |
| Q9Y617      | 6%       | 113   | 2             | 40796 | 7.6 | 6        | 16     | 557.29  | 1112.57 | 1112.6  | -0.03 | 0    | 63         | 3.79E-05  | R.QVVNFPGPPAK.L       |               | 18.55       | 16                  | 1                  |  |
|             |          |       |               |       |     | 52       | 61     | 593.33  | 1184.64 | 1184.65 | -0.01 | 0    | 50         | 0.0007743 | K.IINNTENLV.R.E       |               | 17.07       |                     |                    |  |
| Q15365      | 6%       | 125   | 2             | 37987 | 6.7 | 47       | 57     | 644.77  | 1287.52 | 1287.59 | -0.07 | 0    | 64         | 2.85E-05  | R.INISEGNCPER.I       |               | 14.2        | 16                  | 1                  |  |
|             |          |       |               |       |     | 298      | 306    | 507.76  | 1013.51 | 1013.53 | -0.02 | 0    | 61         | 6.07E-05  | R.QGANINEIR.Q         |               | 13.86       |                     |                    |  |
| P61160      | 5%       | 77    | 2             | 45017 | 6.3 | 98       | 103    | 366.19  | 730.37  | 730.4   | -0.03 | 0    | 37         | 0.0234386 | K.LNIDTR.N            |               | 13.77       | 16                  | 1                  |  |
|             |          |       |               |       |     | 107      | 118    | 685.37  | 1368.72 | 1368.73 | -0.01 | 0    | 40         | 0.0060911 | K.ILLTEPPMNPTK.N      | Oxidation (M) |             | 19.24               |                    |  |
| P61421      | 14%      | 216   | 5             | 40759 | 4.9 | 188      | 195    | 510.75  | 1019.49 | 1019.5  | -0.01 | 0    | 33         | 0.0424782 | K.AYLESFYK.F          |               | 20.06       | 17                  | 1                  |  |
|             |          |       |               |       |     | 247      | 257    | 615.83  | 1229.66 | 1229.68 | -0.02 | 0    | 45         | 0.0022481 | R.LYPEGLAQLAR.A       |               | 20.49       |                     |                    |  |
|             |          |       |               |       |     | 258      | 265    | 484.21  | 966.4   | 966.43  | -0.03 | 0    | 32         | 0.0370318 | R.ADDYEQVK.N          |               | 12.83       |                     |                    |  |
|             |          |       |               |       |     | 266      | 275    | 631.28  | 1260.55 | 1260.57 | -0.02 | 0    | 33         | 0.0343912 | K.NVADYYPEYK.L        |               | 19.41       |                     |                    |  |
|             |          |       |               |       |     | 276      | 288    | 652.82  | 1303.62 | 1303.64 | -0.02 | 0    | 72         | 4.59E-06  | K.LLFEAGSNPDK.T       |               | 19.63       |                     |                    |  |
| accession # | coverage | score | stinct peptid | mass  | pl  | start AA | end AA | m/z obs | M obs   | M calc  | delta | miss | pept score | exp val   | peptide               | modifications | retent time | Strongest gel slice | # gel slices found |  |





| accession # | coverage | score | stinct peptid | mass  | pl   | start AA | end AA | m/z obs | M obs   | M calc  | delta | miss | pept score | exp val   | peptide                | modifications                          | retent time | Strongest gel slice | # gel slices found |
|-------------|----------|-------|---------------|-------|------|----------|--------|---------|---------|---------|-------|------|------------|-----------|------------------------|----------------------------------------|-------------|---------------------|--------------------|
|             |          |       |               |       |      | 130      | 140    | 591.78  | 1181.54 | 1181.56 | -0.02 | 0    | 70         | 6.67E-06  | R.YLSEVASGDNK.Q        |                                        |             | 13.74               |                    |
| P27348      | 12%      | 186   | 3             | 28032 | 4.7  | 28       | 41     | 766.86  | 1531.7  | 1531.71 | -0.01 | 0    | 85         | 2.39E-07  | K.AVTEQGAELSNEER.N     |                                        | 13.83       | 22                  | 3                  |
|             |          |       |               |       |      | 42       | 49     | 454.25  | 906.49  | 906.52  | -0.02 | 0    | 48         | 0.0013646 | R.NLLSVAYK.N           |                                        | 19.81       |                     |                    |
|             |          |       |               |       |      | 61       | 68     | 452.25  | 902.48  | 902.51  | -0.03 | 0    | 53         | 0.0004209 | R.VISSIEQK.T           |                                        | 13.14       |                     |                    |
| Q04917      | 10%      | 136   | 3             | 28372 | 4.8  | 20       | 28     | 524.18  | 1046.35 | 1046.4  | -0.05 | 0    | 35         | 0.02322   | R.YDDMASAMK.A          | Oxidation (M)                          | 12.26       | 22                  | 3                  |
|             |          |       |               |       |      | 43       | 50     | 454.25  | 906.49  | 906.52  | -0.02 | 0    | 48         | 0.0013646 | R.NLLSVAYK.N           |                                        | 19.81       |                     |                    |
|             |          |       |               |       |      | 62       | 69     | 452.25  | 902.48  | 902.51  | -0.03 | 0    | 53         | 0.0004209 | R.VISSIEQK.T           |                                        | 13.14       |                     |                    |
| P07686      | 4%       | 102   | 2             | 63527 | 6.3  | 391      | 400    | 550.34  | 1098.66 | 1098.66 | 0     | 0    | 52         | 0.0004272 | K.VLDIITINK.G          |                                        | 21.02       | 22                  | 4                  |
|             |          |       |               |       |      | 466      | 476    | 595.8   | 1189.58 | 1189.6  | -0.02 | 0    | 50         | 0.0007911 | K.VEPLDFGGTQK.Q        |                                        | 19.73       |                     |                    |
| P04792      | 18%      | 254   | 4             | 22826 | 6    | 28       | 37     | 582.29  | 1162.57 | 1162.61 | -0.04 | 0    | 68         | 1.06E-05  | R.LFDQAFGLR.L          |                                        | 21.36       | 23                  | 3                  |
|             |          |       |               |       |      | 80       | 89     | 538.28  | 1074.54 | 1074.57 | -0.03 | 0    | 84         | 3.15E-07  | R.QLSGVSEIR.H          |                                        | 14.98       |                     |                    |
|             |          |       |               |       |      | 189      | 198    | 471.25  | 940.48  | 940.5   | -0.02 | 0    | 39         | 0.0096711 | R.AQLGGPEAAK.S         |                                        | 12.82       |                     |                    |
|             |          |       |               |       |      | 189      | 205    | 548.6   | 1642.77 | 1642.82 | -0.05 | 1    | 65         | 2.13E-05  | R.AQLGGPEAAKSDETAAK.-  |                                        | 12.77       |                     |                    |
| P51572      | 12%      | 110   | 2             | 28031 | 8.4  | 168      | 182    | 572.27  | 1713.79 | 1713.85 | -0.07 | 1    | 68         | 9.58E-06  | K.LDVGNAEVKLEENR.S     |                                        | 19.49       | 23                  | 2                  |
|             |          |       |               |       |      | 233      | 246    | 516.24  | 1545.68 | 1545.73 | -0.05 | 2    | 42         | 0.0045073 | K.LQAAVDGPMDKKE.-      | Oxidation (M)                          | 12.73       |                     |                    |
| P62241      | 11%      | 73    | 2             | 24475 | 10.3 | 158      | 170    | 753.88  | 1505.75 | 1505.77 | -0.02 | 0    | 36         | 0.0164899 | K.ISSLLEEQFQQK.L       |                                        | 20.45       | 23                  | 2                  |
|             |          |       |               |       |      | 185      | 193    | 476.22  | 950.42  | 950.47  | -0.05 | 0    | 37         | 0.0150981 | R.ADGVYVLEK.E          |                                        | 15.63       |                     |                    |
| P60900      | 9%       | 109   | 2             | 27838 | 6.3  | 31       | 43     | 643.35  | 1284.68 | 1284.71 | -0.04 | 0    | 68         | 1.09E-05  | K.AINQGGTLTSVAVR.G     |                                        | 19.19       | 23                  | 1                  |
|             |          |       |               |       |      | 172      | 181    | 585.27  | 1168.53 | 1168.56 | -0.03 | 0    | 40         | 0.0065303 | K.QTESTSFLEK.K         |                                        | 17.02       |                     |                    |
| P63104      | 22%      | 317   | 5             | 27899 | 4.7  | 1        | 9      | 581.78  | 1161.54 | 1161.57 | -0.03 | 1    | 60         | 7.08E-05  | -MDKNELVQK.A           | Acetyl (Protein N-term); Oxidation (M) | 13.03       | 24                  | 6                  |
|             |          |       |               |       |      | 28       | 41     | 774.84  | 1547.66 | 1547.71 | -0.05 | 0    | 114        | 2.67E-10  | K.SVTEQGAELSNEER.N     |                                        | 14.07       |                     |                    |
|             |          |       |               |       |      | 42       | 49     | 454.25  | 906.49  | 906.52  | -0.03 | 0    | 40         | 0.0079433 | R.NLLSVAYK.N           |                                        | 19.86       |                     |                    |
|             |          |       |               |       |      | 104      | 115    | 652.83  | 1303.64 | 1303.68 | -0.04 | 0    | 50         | 0.0007215 | K.FLIPNASQAESK.V       |                                        | 19.73       |                     |                    |
|             |          |       |               |       |      | 128      | 139    | 427.21  | 1278.6  | 1278.65 | -0.05 | 1    | 52         | 0.0003927 | R.YLAEVAAGDDKK.G       |                                        | 13.46       |                     |                    |
| O43399      | 19%      | 162   | 3             | 22281 | 5.3  | 1        | 15     | 831.34  | 1660.66 | 1660.74 | -0.08 | 0    | 52         | 0.003953  | -MDSAGDINLNNSPK.G      | Acetyl (Protein N-term); Oxidation (M) | 19.12       | 24                  | 1                  |
|             |          |       |               |       |      | 129      | 139    | 595.79  | 1189.56 | 1189.59 | -0.04 | 0    | 61         | 6.21E-05  | K.TQETLSQAGK.T         |                                        | 12.51       |                     |                    |
|             |          |       |               |       |      | 140      | 153    | 660.84  | 1319.66 | 1319.7  | -0.04 | 0    | 50         | 0.0006633 | K.TSAALSTVGSISR.K      |                                        | 19.47       |                     |                    |
| P30040      | 8%       | 132   | 2             | 29032 | 6.8  | 37       | 48     | 662.85  | 1323.68 | 1323.71 | -0.02 | 0    | 47         | 0.0012355 | K.GALPLDVTFFYK.V       |                                        | 21.21       | 24                  | 3                  |
|             |          |       |               |       |      | 183      | 192    | 538.27  | 1074.52 | 1074.53 | -0.01 | 0    | 85         | 2.69E-07  | K.QGGDNLSVVK.E         |                                        | 12.81       |                     |                    |
| P07339      | 21%      | 478   | 8             | 45037 | 6.1  | 177      | 184    | 440.22  | 878.42  | 878.45  | -0.03 | 0    | 46         | 0.0017974 | R.QVFGQATK.Q           |                                        | 13.49       | 25                  | 13                 |
|             |          |       |               |       |      | 177      | 194    | 636     | 1904.97 | 1905.04 | -0.06 | 1    | 67         | 1.15E-05  | R.QVFGQATKQPGITFIAAK.F |                                        | 20.04       |                     |                    |
|             |          |       |               |       |      | 185      | 194    | 514.78  | 1027.54 | 1027.57 | -0.03 | 0    | 49         | 0.0010303 | K.QPGITFIAAK.F         | Gln->pyro-Glu (N-term Q)               | 21.22       |                     |                    |
|             |          |       |               |       |      | 195      | 205    | 628.29  | 1254.57 | 1254.61 | -0.04 | 0    | 73         | 3.98E-06  | K.FDGLGMYPR.I          | Oxidation (M)                          | 20.52       |                     |                    |
|             |          |       |               |       |      | 223      | 235    | 801.39  | 1600.76 | 1600.82 | -0.06 | 0    | 52         | 0.0004544 | K.LVDQNIFSYLSR.D       |                                        | 22.86       |                     |                    |
|             |          |       |               |       |      | 236      | 253    | 902.39  | 1802.76 | 1802.8  | -0.04 | 0    | 90         | 6.75E-08  | R.DPDAQPGGELMLGGTDSK.Y | Oxidation (M)                          | 19.42       |                     |                    |
|             |          |       |               |       |      | 314      | 331    | 1002.99 | 2003.96 | 2004.01 | -0.04 | 0    | 45         | 0.0020783 | K.AIGAVPLIQEYMIPCEK.V  | Oxidation (M)                          | 21.04       |                     |                    |
|             |          |       |               |       |      | 349      | 357    | 533.26  | 1064.51 | 1064.54 | -0.03 | 0    | 58         | 0.0001217 | K.LSPEDYTLK.V          |                                        | 19.51       |                     |                    |
| O00299      | 21%      | 98    | 4             | 27248 | 5.1  | 2        | 13     | 729.86  | 1457.7  | 1457.74 | -0.04 | 0    | 44         | 0.0028676 | M.AEEQPOVELFVK.A       | Acetyl (Protein N-term)                | 21.69       | 25                  | 2                  |
|             |          |       |               |       |      | 38       | 49     | 641.33  | 1280.64 | 1280.66 | -0.02 | 0    | 66         | 1.59E-05  | K.GVTFNVTVDTK.R        |                                        | 19.77       |                     |                    |
|             |          |       |               |       |      | 96       | 113    | 922.98  | 1843.95 | 1843.97 | -0.02 | 0    | 53         | 0.0003056 | K.LAALNPESNTAGLDFIAK.F |                                        | 21.52       |                     |                    |
|             |          |       |               |       |      | 209      | 216    | 479.23  | 956.44  | 956.47  | -0.03 | 0    | 35         | 0.0270504 | R.YLSNAYAR.E           |                                        | 13.93       |                     |                    |
|             |          |       |               |       |      |          |        |         |         |         |       |      |            |           |                        |                                        |             |                     |                    |











| accession # | coverage | score | stinct peptid | mass  | pl  | start AA                           | end AA | m/z obs | M obs  | M calc | delta  | miss  | pept score | exp val | peptide                  | modifications | retent time | Strongest gel slice | # gel slices found |
|-------------|----------|-------|---------------|-------|-----|------------------------------------|--------|---------|--------|--------|--------|-------|------------|---------|--------------------------|---------------|-------------|---------------------|--------------------|
| O75396      | 9%       | 92    | 2             | 24896 | 8.7 | O75396 SC22B_HUMAN Vesicle-traffic | 160    | 169     | 495.73 | 989.44 | 989.5  | -0.07 | 0          | 48      | 0.0015363 R.GEALSALDSK.A |               | 16.08       | 46                  | 2                  |
|             |          |       |               |       |     |                                    | 170    | 178     | 467.23 | 932.44 | 932.49 | -0.06 | 0          | 45      | 0.0029124 K.ANNLSSLSK.K  |               | 13.33       |                     |                    |

**\*Footnotes to Supplemental Table 7:**

Data sets were searched with the Mascot search engine (see Perkins et al. (1999)*Electrophoresis* **20**, 3551-3567).

Detailed are the SwissProt accession number, the number of distinct proteolytic peptides (in some cases the number of observed redundant peptide sequences is indicated in parentheses), and the sequence coverage of the protein (%).

Listed is the Mascot protein score as well as the score and expectation value for the individual peptides.

Additional columns indicate the position of the protein in the 1D-SDS PAGE gel (strongest gel slice in which the protein was identified, and the total # of adjacent gel slices in which the protein was found).

Proteins identified by single-peptide assignments for this experiment are not listed in this Table but in Supplemental Table 12.

**Supplemental Table 8. Proteins identified by HPLC-MS/MS on 5-day BCG infected human THP-1 phagosome preparation.\***

ESI-MS/MS raw data obtained on a QSTAR Pulsar i instrument and Mascot search results for trypsin digestion of proteins separated on a 1D-SDS PAGE gel. For summary see Supplemental Table 1

| accession #                                                            | coverage | score | distinct peptides | mass   | pl  | start AA           | end AA                                               | m/z obs                               | M obs | M calc | delta | miss | pept score | exp val | peptide                                                                        | modifications                                                           | retent time | Strongest gel slice | # gel slices found |       |    |        |     |                   |          |                                   |  |  |  |  |  |  |                                                               |  |   |   |
|------------------------------------------------------------------------|----------|-------|-------------------|--------|-----|--------------------|------------------------------------------------------|---------------------------------------|-------|--------|-------|------|------------|---------|--------------------------------------------------------------------------------|-------------------------------------------------------------------------|-------------|---------------------|--------------------|-------|----|--------|-----|-------------------|----------|-----------------------------------|--|--|--|--|--|--|---------------------------------------------------------------|--|---|---|
| P05023                                                                 | 8%       | 436   | 7                 | 114135 | 5.3 | P05023 AT1A1_HUMAN | Sodium/potassium-transporting ATPase subunit alpha-1 | OS=Homo sapiens GN=ATP1A1 PE=1 SV=1   |       |        |       |      |            |         |                                                                                |                                                                         |             | 1                   | 2                  |       |    |        |     |                   |          |                                   |  |  |  |  |  |  |                                                               |  |   |   |
|                                                                        |          |       |                   |        |     |                    |                                                      |                                       |       |        |       |      |            |         |                                                                                | 68 74 372.21 742.4 742.43 -0.03 0 49 0.0010315 R.AAEILAR.D              |             |                     |                    | 14.24 |    |        |     |                   |          |                                   |  |  |  |  |  |  |                                                               |  |   |   |
|                                                                        |          |       |                   |        |     |                    |                                                      |                                       |       |        |       |      |            |         |                                                                                | 213 227 810.36 1618.7 1618.74 -0.04 0 105 2.42E-09 K.VDNSSLTGESEPOQTR.S |             |                     |                    | 14.11 |    |        |     |                   |          |                                   |  |  |  |  |  |  |                                                               |  |   |   |
|                                                                        |          |       |                   |        |     |                    |                                                      |                                       |       |        |       |      |            |         |                                                                                | 228 240 760.34 1518.67 1518.7 -0.03 0 66 1.71E-05 R.SPFDFTNENPLETR.N    |             |                     |                    | 20.69 |    |        |     |                   |          |                                   |  |  |  |  |  |  |                                                               |  |   |   |
|                                                                        |          |       |                   |        |     |                    |                                                      |                                       |       |        |       |      |            |         |                                                                                | 446 458 616.32 1230.62 1230.65 -0.03 0 50 0.0008823 R.AVAGDASESALLK.C   |             |                     |                    | 19.59 |    |        |     |                   |          |                                   |  |  |  |  |  |  |                                                               |  |   |   |
|                                                                        |          |       |                   |        |     |                    |                                                      |                                       |       |        |       |      |            |         |                                                                                | 477 487 631.34 1260.66 1260.67 -0.01 0 52 0.000488 K.IVEIPFNSTNK.Y      |             |                     |                    | 20.78 |    |        |     |                   |          |                                   |  |  |  |  |  |  |                                                               |  |   |   |
|                                                                        |          |       |                   |        |     |                    |                                                      |                                       |       |        |       |      |            |         |                                                                                | 648 658 618.85 1235.68 1235.7 -0.02 0 51 0.0005475 R.LNIPVSVQVNP.RD     |             |                     |                    | 20.16 |    |        |     |                   |          |                                   |  |  |  |  |  |  |                                                               |  |   |   |
|                                                                        |          |       |                   |        |     |                    |                                                      |                                       |       |        |       |      |            |         |                                                                                | 728 743 753.87 1505.73 1505.74 -0.01 0 64 2.93E-05 K.ADIGVAMGIAGSDVSK.Q |             |                     |                    | 19.98 |    |        |     |                   |          |                                   |  |  |  |  |  |  |                                                               |  |   |   |
| Oxidation (M)                                                          |          |       |                   |        |     |                    |                                                      |                                       |       |        |       |      |            |         |                                                                                |                                                                         |             |                     |                    |       |    |        |     |                   |          |                                   |  |  |  |  |  |  |                                                               |  |   |   |
| O15427                                                                 | 8%       | 115   | 3                 | 50064  | 8.2 | O15427 TMOT4_HUMAN | Monocarboxylate transporter 4                        | OS=Homo sapiens GN=SLC16A3 PE=1 SV=1  |       |        |       |      |            |         |                                                                                |                                                                         | 1           | 1                   |                    |       |    |        |     |                   |          |                                   |  |  |  |  |  |  |                                                               |  |   |   |
|                                                                        |          |       |                   |        |     |                    |                                                      |                                       |       |        |       |      |            |         | 2 14 593.31 1184.6 1184.6 0 41 0.0071432 M.GGAVVDEGPTGVK.A                     |                                                                         |             |                     | 14.16              |       |    |        |     |                   |          |                                   |  |  |  |  |  |  |                                                               |  |   |   |
|                                                                        |          |       |                   |        |     |                    |                                                      |                                       |       |        |       |      |            |         | 429 441 468.92 1403.73 1403.75 -0.03 0 37 0.0136958 K.LHKPPADSGVDL.R.E         |                                                                         |             |                     | 13.33              |       |    |        |     |                   |          |                                   |  |  |  |  |  |  |                                                               |  |   |   |
|                                                                        |          |       |                   |        |     |                    |                                                      |                                       |       |        |       |      |            |         | 454 465 634.79 1267.56 1267.6 -0.04 0 37 0.0123089 K.NGEVVTHTPETS.V-           |                                                                         |             |                     | 16.16              |       |    |        |     |                   |          |                                   |  |  |  |  |  |  |                                                               |  |   |   |
| O15321                                                                 | 5%       | 164   | 3                 | 69330  | 6.7 | O15321 TM9S1_HUMAN | Transmembrane 9 superfamily member 1                 | OS=Homo sapiens GN=TM9SF1 PE=2 SV=2   |       |        |       |      |            |         |                                                                                |                                                                         | 1           | 1                   |                    |       |    |        |     |                   |          |                                   |  |  |  |  |  |  |                                                               |  |   |   |
|                                                                        |          |       |                   |        |     |                    |                                                      |                                       |       |        |       |      |            |         | 38 48 594.82 1187.63 1187.66 -0.02 0 58 0.0001402 K.AGDPVILYVVK.V              |                                                                         |             |                     | 20.82              |       |    |        |     |                   |          |                                   |  |  |  |  |  |  |                                                               |  |   |   |
|                                                                        |          |       |                   |        |     |                    |                                                      |                                       |       |        |       |      |            |         | 88 96 564.28 1126.54 1126.53 0 42 0.0043736 R.MAESLYEIR.F                      |                                                                         |             |                     | 20.21              |       |    |        |     |                   |          |                                   |  |  |  |  |  |  |                                                               |  |   |   |
|                                                                        |          |       |                   |        |     |                    |                                                      |                                       |       |        |       |      |            |         | 436 446 624.78 1247.54 1247.54 0.01 0 64 2.95E-05 K.NNASPFDPAPCR.T             |                                                                         |             |                     | 17.16              |       |    |        |     |                   |          |                                   |  |  |  |  |  |  |                                                               |  |   |   |
| Oxidation (M)                                                          |          |       |                   |        |     |                    |                                                      |                                       |       |        |       |      |            |         |                                                                                |                                                                         |             |                     |                    |       |    |        |     |                   |          |                                   |  |  |  |  |  |  |                                                               |  |   |   |
| Q92544                                                                 | 5%       | 127   | 3                 | 75211  | 6.1 | Q92544 TM9S4_HUMAN | Transmembrane 9 superfamily member 4                 | OS=Homo sapiens GN=TM9SF4 PE=1 SV=2   |       |        |       |      |            |         |                                                                                |                                                                         | 1           | 2                   |                    |       |    |        |     |                   |          |                                   |  |  |  |  |  |  |                                                               |  |   |   |
|                                                                        |          |       |                   |        |     |                    |                                                      |                                       |       |        |       |      |            |         | 73 81 500.76 999.51 999.53 -0.02 0 34 0.0353589 K.AENLGEVL.R.G                 |                                                                         |             |                     | 20.25              |       |    |        |     |                   |          |                                   |  |  |  |  |  |  |                                                               |  |   |   |
|                                                                        |          |       |                   |        |     |                    |                                                      |                                       |       |        |       |      |            |         | 85 98 818.4 1634.79 1634.83 -0.05 0 58 0.0001116 R.LVNTFPFQVLMNSEK.K           |                                                                         |             |                     | 21.8               |       |    |        |     |                   |          |                                   |  |  |  |  |  |  |                                                               |  |   |   |
|                                                                        |          |       |                   |        |     |                    |                                                      |                                       |       |        |       |      |            |         | 483 488 364.7 727.38 727.4 -0.01 0 36 0.0198653 R.TNQIPR.Q                     |                                                                         |             |                     | 12.77              |       |    |        |     |                   |          |                                   |  |  |  |  |  |  |                                                               |  |   |   |
| Oxidation (M)                                                          |          |       |                   |        |     |                    |                                                      |                                       |       |        |       |      |            |         |                                                                                |                                                                         |             |                     |                    |       |    |        |     |                   |          |                                   |  |  |  |  |  |  |                                                               |  |   |   |
| Q99805                                                                 | 4%       | 110   | 3                 | 76809  | 7.2 | Q99805 TM9S2_HUMAN | Transmembrane 9 superfamily member 2                 | OS=Homo sapiens GN=TM9SF2 PE=1 SV=1   |       |        |       |      |            |         |                                                                                |                                                                         | 1           | 2                   |                    |       |    |        |     |                   |          |                                   |  |  |  |  |  |  |                                                               |  |   |   |
|                                                                        |          |       |                   |        |     |                    |                                                      |                                       |       |        |       |      |            |         | 58 66 545.79 1089.57 1089.58 -0.01 0 41 0.0071204 K.AEILFVNR.L                 |                                                                         |             |                     | 21.53              |       |    |        |     |                   |          |                                   |  |  |  |  |  |  |                                                               |  |   |   |
|                                                                        |          |       |                   |        |     |                    |                                                      |                                       |       |        |       |      |            |         | 192 203 479.21 1434.6 1434.62 -0.02 0 33 0.0311329 K.DACVISSDFHER.D            |                                                                         |             |                     | 19.76              |       |    |        |     |                   |          |                                   |  |  |  |  |  |  |                                                               |  |   |   |
|                                                                        |          |       |                   |        |     |                    |                                                      |                                       |       |        |       |      |            |         | 504 509 364.7 727.38 727.4 -0.01 0 36 0.0198653 R.TNQIPR.Q                     |                                                                         |             |                     | 12.77              |       |    |        |     |                   |          |                                   |  |  |  |  |  |  |                                                               |  |   |   |
| Oxidation (M)                                                          |          |       |                   |        |     |                    |                                                      |                                       |       |        |       |      |            |         |                                                                                |                                                                         |             |                     |                    |       |    |        |     |                   |          |                                   |  |  |  |  |  |  |                                                               |  |   |   |
| O75844                                                                 | 3%       | 69    | 2                 | 55063  | 7.1 | O75844 FACE1_HUMAN | CAAX prenyl protease 1 homolog                       | OS=Homo sapiens GN=ZMPSTE24 PE=1 SV=2 |       |        |       |      |            |         |                                                                                |                                                                         | 1           | 1                   |                    |       |    |        |     |                   |          |                                   |  |  |  |  |  |  |                                                               |  |   |   |
|                                                                        |          |       |                   |        |     |                    |                                                      |                                       |       |        |       |      |            |         | 304 314 639.27 1276.53 1276.54 -0.01 0 40 0.0079059 R.NEEEGNSEIK.A             |                                                                         |             |                     | 12.85              |       |    |        |     |                   |          |                                   |  |  |  |  |  |  |                                                               |  |   |   |
|                                                                        |          |       |                   |        |     |                    |                                                      |                                       |       |        |       |      |            |         | 304 316 492.87 1475.59 1475.67 -0.08 1 32 0.0460731 R.NEEEGNSEIKAK.V           |                                                                         |             |                     | 12.51              |       |    |        |     |                   |          |                                   |  |  |  |  |  |  |                                                               |  |   |   |
| Q9HC07                                                                 | 11%      | 137   | 2                 | 35055  | 6.5 | Q9HC07 TM165_HUMAN | Transmembrane protein 165                            | OS=Homo sapiens GN=TMEM165 PE=1 SV=1  |       |        |       |      |            |         |                                                                                |                                                                         | 2           | 2                   |                    |       |    |        |     |                   |          |                                   |  |  |  |  |  |  |                                                               |  |   |   |
|                                                                        |          |       |                   |        |     |                    |                                                      |                                       |       |        |       |      |            |         | 43 67 883.11 2646.31 2646.39 -0.08 1 85 1.48E-07 R.NKEPPAPAQQQLPQPVAVQGPPEAR.V |                                                                         |             |                     | 19.64              |       |    |        |     |                   |          |                                   |  |  |  |  |  |  |                                                               |  |   |   |
|                                                                        |          |       |                   |        |     |                    |                                                      |                                       |       |        |       |      |            |         | 253 263 586.84 1171.66 1171.69 -0.03 0 52 0.0004632 R.SQLTTIVLAAR.E            |                                                                         |             |                     | 21.29              |       |    |        |     |                   |          |                                   |  |  |  |  |  |  |                                                               |  |   |   |
| Q9Y490                                                                 | 9%       | 1004  | 18                | 271766 | 5.8 | Q9Y490 TLN1_HUMAN  | Talin-1                                              | OS=Homo sapiens GN=TLN1 PE=1 SV=3     |       |        |       |      |            |         |                                                                                |                                                                         | 2           | 2                   |                    |       |    |        |     |                   |          |                                   |  |  |  |  |  |  |                                                               |  |   |   |
|                                                                        |          |       |                   |        |     |                    |                                                      |                                       |       |        |       |      |            |         | 614 624 543.31 1084.6 1084.62 -0.03 0 43 0.0041512 K.GLGAVSELLR.S              |                                                                         |             |                     | 22.4               |       |    |        |     |                   |          |                                   |  |  |  |  |  |  |                                                               |  |   |   |
|                                                                        |          |       |                   |        |     |                    |                                                      |                                       |       |        |       |      |            |         | 625 634 507.24 1012.47 1012.49 -0.02 0 34 0.0268569 R.SAQPASAEPR.Q             |                                                                         |             |                     | 12.54              |       |    |        |     |                   |          |                                   |  |  |  |  |  |  |                                                               |  |   |   |
|                                                                        |          |       |                   |        |     |                    |                                                      |                                       |       |        |       |      |            |         | 899 910 610.3 1218.58 1218.6 -0.02 0 87 1.39E-07 R.MATNAAAQNAIK.K              |                                                                         |             |                     | 13.28              |       |    |        |     |                   |          |                                   |  |  |  |  |  |  |                                                               |  |   |   |
|                                                                        |          |       |                   |        |     |                    |                                                      |                                       |       |        |       |      |            |         | 923 943 665.67 1993.98 1994.02 -0.04 0 76 1.62E-06 K.QAAASATQTIAAAQHAASTPK.A   |                                                                         |             |                     | 19.78              |       |    |        |     |                   |          |                                   |  |  |  |  |  |  |                                                               |  |   |   |
|                                                                        |          |       |                   |        |     |                    |                                                      |                                       |       |        |       |      |            |         | 958 971 746.94 1491.87 1491.88 -0.01 0 40 0.0066956 K.AVAEQIPLLVQVGR.G         |                                                                         |             |                     | 22.09              |       |    |        |     |                   |          |                                   |  |  |  |  |  |  |                                                               |  |   |   |
|                                                                        |          |       |                   |        |     |                    |                                                      |                                       |       |        |       |      |            |         | 1026 1035 529.3 1056.58 1056.59 -0.02 0 41 0.0060205 K.NLGTALAE LR.T           |                                                                         |             |                     | 21.56              |       |    |        |     |                   |          |                                   |  |  |  |  |  |  |                                                               |  |   |   |
|                                                                        |          |       |                   |        |     |                    |                                                      |                                       |       |        |       |      |            |         | 1172 1184 450.53 1348.57 1348.61 -0.05 0 35 0.023369 K.AAGHPGDPESQQR.L         |                                                                         |             |                     | 12.46              |       |    |        |     |                   |          |                                   |  |  |  |  |  |  |                                                               |  |   |   |
|                                                                        |          |       |                   |        |     |                    |                                                      |                                       |       |        |       |      |            |         | 1321 1332 599.32 1196.62 1196.64 -0.02 0 43 0.003219 K.ALSTDPAAPNLK.S          |                                                                         |             |                     | 17.63              |       |    |        |     |                   |          |                                   |  |  |  |  |  |  |                                                               |  |   |   |
|                                                                        |          |       |                   |        |     |                    |                                                      |                                       |       |        |       |      |            |         | 1402 1415 717.86 1433.7 1433.72 -0.02 0 94 2.53E-08 K.VLGEAMTGISQNAK.N         |                                                                         |             |                     | 15.44              |       |    |        |     |                   |          |                                   |  |  |  |  |  |  |                                                               |  |   |   |
|                                                                        |          |       |                   |        |     |                    |                                                      |                                       |       |        |       |      |            |         | 1531 1541 573.3 1144.59 1144.61 -0.02 0 59 9.78E-05 K.EVANSTANLVK.T            |                                                                         |             |                     | 15                 |       |    |        |     |                   |          |                                   |  |  |  |  |  |  |                                                               |  |   |   |
|                                                                        |          |       |                   |        |     |                    |                                                      |                                       |       |        |       |      |            |         | 1594 1604 573.31 1144.6 1144.62 -0.02 0 56 0.000188 R.AAMEPIVISAK.T            |                                                                         |             |                     | 18.59              |       |    |        |     |                   |          |                                   |  |  |  |  |  |  |                                                               |  |   |   |
|                                                                        |          |       |                   |        |     |                    |                                                      |                                       |       |        |       |      |            |         | 1605 1618 732.37 1462.74 1462.74 -0.01 0 62 4.36E-05 K.TMLESAGGLIQTAR.A        |                                                                         |             |                     | 20.49              |       |    |        |     |                   |          |                                   |  |  |  |  |  |  |                                                               |  |   |   |
|                                                                        |          |       |                   |        |     |                    |                                                      |                                       |       |        |       |      |            |         | 1752 1766 576.28 11725.81 11725.87 -0.06 0 42 0.0044204 K.TLSPHPQQMALLDQTK.T   |                                                                         |             |                     | 15.87              |       |    |        |     |                   |          |                                   |  |  |  |  |  |  |                                                               |  |   |   |
|                                                                        |          |       |                   |        |     |                    |                                                      |                                       |       |        |       |      |            |         | 2032 2043 622.32 1242.63 1242.66 -0.03 0 74 3.03E-06 K.VLVQNAAGSSEQ.L          |                                                                         |             |                     | 13.5               |       |    |        |     |                   |          |                                   |  |  |  |  |  |  |                                                               |  |   |   |
|                                                                        |          |       |                   |        |     |                    |                                                      |                                       |       |        |       |      |            |         | 2044 2057 708.88 1415.74 1415.77 -0.03 0 95 2.17E-08 K.LAQAAQSSVATITR.L        |                                                                         |             |                     | 17.67              |       |    |        |     |                   |          |                                   |  |  |  |  |  |  |                                                               |  |   |   |
|                                                                        |          |       |                   |        |     |                    |                                                      |                                       |       |        |       |      |            |         | 2090 2099 494.78 987.54 987.56 -0.02 0 45 0.0032341 K.ALGDLSATK.A              |                                                                         |             |                     | 21.02              |       |    |        |     |                   |          |                                   |  |  |  |  |  |  |                                                               |  |   |   |
|                                                                        |          |       |                   |        |     |                    |                                                      |                                       |       |        |       |      |            |         | 2120 2130 610.84 1219.66 1219.68 -0.02 0 48 0.0013418 K.VMVTNVTSLK.T           |                                                                         |             |                     | 21.38              |       |    |        |     |                   |          |                                   |  |  |  |  |  |  |                                                               |  |   |   |
|                                                                        |          |       |                   |        |     |                    |                                                      |                                       |       |        |       |      |            |         | 2169 2177 533.25 1064.49 1064.51 -0.02 0 33 0.0318719 K.TSTPEDFIR.M            |                                                                         |             |                     | 20.44              |       |    |        |     |                   |          |                                   |  |  |  |  |  |  |                                                               |  |   |   |
|                                                                        |          |       |                   |        |     |                    |                                                      |                                       |       |        |       |      |            |         | Oxidation (M)                                                                  |                                                                         |             |                     |                    |       |    |        |     |                   |          |                                   |  |  |  |  |  |  |                                                               |  |   |   |
|                                                                        |          |       |                   |        |     |                    |                                                      |                                       |       |        |       |      |            |         | P35579                                                                         |                                                                         |             |                     | 8%                 | 825   | 15 | 227646 | 5.5 | P35579 MYH9_HUMAN | Myosin-9 | OS=Homo sapiens GN=MYH9 PE=1 SV=4 |  |  |  |  |  |  |                                                               |  | 2 | 2 |
|                                                                        |          |       |                   |        |     |                    |                                                      |                                       |       |        |       |      |            |         |                                                                                |                                                                         |             |                     |                    |       |    |        |     |                   |          |                                   |  |  |  |  |  |  | 39 47 468.23 934.46 934.48 -0.02 0 33 0.0403823 K.SGFEPASLK.E |  |   |   |
| 166 180 776.34 1550.67 1550.69 -0.02 0 59 8.60E-05 R.EDQSILCTGESGAGK.T | 18.5     |       |                   |        |     |                    |                                                      |                                       |       |        |       |      |            |         |                                                                                |                                                                         |             |                     |                    |       |    |        |     |                   |          |                                   |  |  |  |  |  |  |                                                               |  |   |   |
| 290 299 603.31 1204.6 1204.63 -0.03 0 43 0.0041165 K.TDLLLEPYNK.Y      | 21.25    |       |                   |        |     |                    |                                                      |                                       |       |        |       |      |            |         |                                                                                |                                                                         |             |                     |                    |       |    |        |     |                   |          |                                   |  |  |  |  |  |  |                                                               |  |   |   |
| 359 373 804.32 1606.63 1606.69 -0.05 0 82 4.24E-07 R.NTDQASMPDNTAAQK.V | 12.5     |       |                   |        |     |                    |                                                      |                                       |       |        |       |      |            |         |                                                                                |                                                                         |             |                     |                    |       |    |        |     |                   |          |                                   |  |  |  |  |  |  |                                                               |  |   |   |
| Oxidation (M)                                                          |          |       |                   |        |     |                    |                                                      |                                       |       |        |       |      |            |         |                                                                                |                                                                         |             |                     |                    |       |    |        |     |                   |          |                                   |  |  |  |  |  |  |                                                               |  |   |   |







| accession # | coverage | score | distinct peptides | mass   | pl  | start AA           | end AA                                                        | m/z obs                               | M obs | M calc | delta | miss | pept score | exp val | peptide                                                                | modifications                                                               | retent time | Strongest gel slice | # gel slices found |               |
|-------------|----------|-------|-------------------|--------|-----|--------------------|---------------------------------------------------------------|---------------------------------------|-------|--------|-------|------|------------|---------|------------------------------------------------------------------------|-----------------------------------------------------------------------------|-------------|---------------------|--------------------|---------------|
| O43707      | 3%       | 144   | 3                 | 105245 | 5.3 | O43707 ACTN4_HUMAN | Alpha-actinin-4                                               | OS=Homo sapiens GN=ACTN4 PE=1 SV=2    |       |        |       |      |            |         |                                                                        |                                                                             | 20.36       | 5                   | 1                  |               |
|             |          |       |                   |        |     |                    |                                                               |                                       |       |        |       |      |            |         |                                                                        | 115 122 432.73 863.44 863.48 -0.03 0 51 0.0006726 K.ALDFIASK.G              |             |                     |                    |               |
|             |          |       |                   |        |     |                    |                                                               |                                       |       |        |       |      |            |         |                                                                        | 724 733 439.85 1316.53 1316.59 -0.07 0 33 0.039607 K.HTNYTMEHIR.V           |             |                     |                    | Oxidation (M) |
|             |          |       |                   |        |     |                    |                                                               |                                       |       |        |       |      |            |         |                                                                        | 761 771 684.8 1367.58 1367.61 -0.03 0 62 4.46E-05 K.GISQEQMQEFR.A           |             |                     |                    | Oxidation (M) |
| 15.04       |          |       |                   |        |     |                    |                                                               |                                       |       |        |       |      |            |         |                                                                        |                                                                             |             |                     |                    |               |
| P37840      | 27%      | 158   | 2                 | 14451  | 4.7 | P37840 SYUA_HUMAN  | Alpha-synuclein                                               | OS=Homo sapiens GN=SNCA PE=1 SV=1     |       |        |       |      |            |         |                                                                        |                                                                             | 20.61       | 6                   | 5                  |               |
|             |          |       |                   |        |     |                    |                                                               |                                       |       |        |       |      |            |         |                                                                        | 59 80 719.71 2156.12 2156.18 -0.06 1 74 2.38E-06 K.TKEQVTVNGGAVVTGVTAQAQK.T |             |                     |                    |               |
|             |          |       |                   |        |     |                    |                                                               |                                       |       |        |       |      |            |         |                                                                        | 81 96 739.88 1477.74 1477.78 -0.03 0 84 2.37E-07 K.TVEGAGSIAAATGFVK.K       |             |                     |                    |               |
|             |          |       |                   |        |     |                    |                                                               |                                       |       |        |       |      |            |         |                                                                        |                                                                             |             |                     |                    |               |
| 20.88       |          |       |                   |        |     |                    |                                                               |                                       |       |        |       |      |            |         |                                                                        |                                                                             |             |                     |                    |               |
| P08238      | 15%      | 561   | 10                | 83554  | 5   | P08238 HS90B_HUMAN | Heat shock protein HSP 90-beta                                | OS=Homo sapiens GN=HSP90AB1 PE=1 SV=4 |       |        |       |      |            |         |                                                                        | 19.91                                                                       | 6           | 3                   |                    |               |
|             |          |       |                   |        |     |                    |                                                               |                                       |       |        |       |      |            |         | 42 53 638.31 1274.61 1274.64 -0.02 0 64 2.91E-05 R.ELINSASDALDK.I      |                                                                             |             |                     |                    |               |
|             |          |       |                   |        |     |                    |                                                               |                                       |       |        |       |      |            |         | 56 69 513.9 1538.68 1538.75 -0.07 1 39 0.0091374 R.YESLTDPSKLDGSGK.E   |                                                                             |             |                     |                    |               |
|             |          |       |                   |        |     |                    |                                                               |                                       |       |        |       |      |            |         | 73 82 597.81 1193.62 1193.64 -0.02 0 43 0.0036476 R.IDIIPNPOER.T       |                                                                             |             |                     |                    |               |
|             |          |       |                   |        |     |                    |                                                               |                                       |       |        |       |      |            |         | 83 95 683.37 1364.72 1364.72 0 0 65 2.50E-05 R.TLTLVDVTGIMTK.A         |                                                                             |             |                     | Oxidation (M)      |               |
|             |          |       |                   |        |     |                    |                                                               |                                       |       |        |       |      |            |         | 96 107 621.85 1241.68 1241.7 -0.02 0 71 6.09E-06 K.ADLINNLGTIAK.S      |                                                                             |             |                     |                    |               |
|             |          |       |                   |        |     |                    |                                                               |                                       |       |        |       |      |            |         | 276 284 576.4 1150.79 1150.55 0.23 0 60 7.33E-05 K.YIDQEELNK.T         |                                                                             |             |                     |                    |               |
|             |          |       |                   |        |     |                    |                                                               |                                       |       |        |       |      |            |         | 339 347 540.76 1079.5 1079.53 -0.03 0 39 0.0092774 R.APFDFLFENK.K      |                                                                             |             |                     |                    |               |
|             |          |       |                   |        |     |                    |                                                               |                                       |       |        |       |      |            |         | 482 491 580.78 1159.55 1159.58 -0.02 0 36 0.0215918 K.SIYYITGESK.E     |                                                                             |             |                     |                    |               |
|             |          |       |                   |        |     |                    |                                                               |                                       |       |        |       |      |            |         | 492 502 625.29 1248.57 1248.61 -0.04 0 65 2.44E-05 K.EQVANSAFVER.V     |                                                                             |             |                     |                    |               |
|             |          |       |                   |        |     |                    |                                                               |                                       |       |        |       |      |            |         | 613 623 648.74 1295.46 1295.48 -0.02 0 49 0.0008378 R.DNSTMGYMMAK.K    |                                                                             |             |                     | 3 Oxidation (M)    |               |
|             |          |       |                   |        |     |                    |                                                               |                                       |       |        |       |      |            |         | 12.9                                                                   |                                                                             |             |                     |                    |               |
| P07900      | 11%      | 394   | 7                 | 85006  | 4.9 | P07900 HS90A_HUMAN | Heat shock protein HSP 90-alpha                               | OS=Homo sapiens GN=HSP90AA1 PE=1 SV=5 |       |        |       |      |            |         |                                                                        | 18.82                                                                       | 6           | 1                   |                    |               |
|             |          |       |                   |        |     |                    |                                                               |                                       |       |        |       |      |            |         | 47 58 646.3 1290.58 1290.63 -0.05 0 60 7.29E-05 R.ELINSSSDALDK.I       |                                                                             |             |                     |                    |               |
|             |          |       |                   |        |     |                    |                                                               |                                       |       |        |       |      |            |         | 61 74 513.9 1538.68 1538.75 -0.07 1 39 0.0091374 R.YESLTDPSKLDGSGK.E   |                                                                             |             |                     |                    |               |
|             |          |       |                   |        |     |                    |                                                               |                                       |       |        |       |      |            |         | 88 100 683.37 1364.72 1364.72 0 0 65 2.50E-05 R.TLTLVDVTGIMTK.A        |                                                                             |             |                     | Oxidation (M)      |               |
|             |          |       |                   |        |     |                    |                                                               |                                       |       |        |       |      |            |         | 101 112 621.85 1241.68 1241.7 -0.02 0 71 6.09E-06 K.ADLINNLGTIAK.S     |                                                                             |             |                     |                    |               |
|             |          |       |                   |        |     |                    |                                                               |                                       |       |        |       |      |            |         | 284 292 576.4 1150.79 1150.55 0.23 0 60 7.33E-05 K.YIDQEELNK.T         |                                                                             |             |                     |                    |               |
|             |          |       |                   |        |     |                    |                                                               |                                       |       |        |       |      |            |         | 339 345 408.25 814.48 814.51 -0.03 0 33 0.043241 R.ALLFVPR.R           |                                                                             |             |                     |                    |               |
|             |          |       |                   |        |     |                    |                                                               |                                       |       |        |       |      |            |         | 500 510 618.3 1234.58 1234.59 -0.02 0 67 1.29E-05 K.DQVANSAFVER.L      |                                                                             |             |                     |                    |               |
|             |          |       |                   |        |     |                    |                                                               |                                       |       |        |       |      |            |         | 21.23                                                                  |                                                                             |             |                     |                    |               |
|             |          |       |                   |        |     |                    |                                                               |                                       |       |        |       |      |            |         | 17.69                                                                  |                                                                             |             |                     |                    |               |
| Q16891      | 7%       | 213   | 5                 | 84026  | 6.1 | Q16891 IMMT_HUMAN  | Mitochondrial inner membrane protein                          | OS=Homo sapiens GN=IMMT PE=1 SV=1     |       |        |       |      |            |         |                                                                        | 13.47                                                                       | 6           | 1                   |                    |               |
|             |          |       |                   |        |     |                    |                                                               |                                       |       |        |       |      |            |         | 111 119 498.24 994.47 994.5 -0.03 0 38 0.00928 K.ISSVSEVMK.E           |                                                                             |             |                     | Oxidation (M)      |               |
|             |          |       |                   |        |     |                    |                                                               |                                       |       |        |       |      |            |         | 258 270 460.55 1378.63 1378.64 -0.01 1 33 0.037948 K.AAMDNSEIAGEKK.S   |                                                                             |             |                     | Oxidation (M)      |               |
|             |          |       |                   |        |     |                    |                                                               |                                       |       |        |       |      |            |         | 287 297 558.29 1114.56 1114.59 -0.03 0 45 0.0022564 K.AVDEAADALLK.A    |                                                                             |             |                     |                    |               |
|             |          |       |                   |        |     |                    |                                                               |                                       |       |        |       |      |            |         | 507 516 605.77 1209.52 1209.55 -0.03 0 61 5.90E-05 K.SEFQNLSEK.L       |                                                                             |             |                     |                    |               |
|             |          |       |                   |        |     |                    |                                                               |                                       |       |        |       |      |            |         | 624 632 527.25 1052.48 1052.51 -0.03 0 38 0.0115893 R.GVYSEETLR.A      |                                                                             |             |                     |                    |               |
|             |          |       |                   |        |     |                    |                                                               |                                       |       |        |       |      |            |         | 16.21                                                                  |                                                                             |             |                     |                    |               |
| P06396      | 7%       | 304   | 5                 | 86043  | 5.9 | P06396 GELS_HUMAN  | Gelsolin                                                      | OS=Homo sapiens GN=GSN PE=1 SV=1      |       |        |       |      |            |         |                                                                        | 15.82                                                                       | 6           | 1                   |                    |               |
|             |          |       |                   |        |     |                    |                                                               |                                       |       |        |       |      |            |         | 361 368 441.72 881.43 881.45 -0.02 0 47 0.0012587 K.TASDFITK.M         |                                                                             |             |                     |                    |               |
|             |          |       |                   |        |     |                    |                                                               |                                       |       |        |       |      |            |         | 585 597 660.34 1318.66 1318.69 -0.03 0 86 1.86E-07 K.AGALNSDNDAFVLK.T  |                                                                             |             |                     |                    |               |
|             |          |       |                   |        |     |                    |                                                               |                                       |       |        |       |      |            |         | 616 623 444.24 886.47 886.49 -0.01 0 40 0.0088377 K.TGAQELLR.V         |                                                                             |             |                     |                    |               |
|             |          |       |                   |        |     |                    |                                                               |                                       |       |        |       |      |            |         | 714 728 555.92 1664.73 1664.77 -0.05 1 69 8.84E-06 K.DSQQEEKLTALSAK.R  |                                                                             |             |                     |                    |               |
|             |          |       |                   |        |     |                    |                                                               |                                       |       |        |       |      |            |         | 730 738 539.75 1077.49 1077.51 -0.02 0 62 4.92E-05 R.YIETDPANR.D       |                                                                             |             |                     |                    |               |
| 13.9        |          |       |                   |        |     |                    |                                                               |                                       |       |        |       |      |            |         |                                                                        |                                                                             |             |                     |                    |               |
| Q14108      | 6%       | 115   | 3                 | 54712  | 5   | Q14108 SCRB2_HUMAN | Lysosome membrane protein 2                                   | OS=Homo sapiens GN=SCARB2 PE=1 SV=2   |       |        |       |      |            |         |                                                                        | 19.47                                                                       | 6           | 2                   |                    |               |
|             |          |       |                   |        |     |                    |                                                               |                                       |       |        |       |      |            |         | 83 92 606.79 1211.56 1211.58 -0.03 0 41 0.0051605 R.VEEVGPYTYR.E       |                                                                             |             |                     | Oxidation (M)      |               |
|             |          |       |                   |        |     |                    |                                                               |                                       |       |        |       |      |            |         | 154 161 481.75 961.49 961.52 -0.02 0 35 0.0247398 R.EIIEAMLK.A         |                                                                             |             |                     | Oxidation (M)      |               |
| 12.38       |          |       |                   |        |     |                    |                                                               |                                       |       |        |       |      |            |         |                                                                        |                                                                             |             |                     |                    |               |
| O43493      | 6%       | 115   | 2                 | 51082  | 5.5 | O43493 TGON2_HUMAN | Trans-Golgi network integral membrane protein 2               | OS=Homo sapiens GN=TGOLN2 PE=1 SV=2   |       |        |       |      |            |         |                                                                        | 12.77                                                                       | 6           | 1                   |                    |               |
|             |          |       |                   |        |     |                    |                                                               |                                       |       |        |       |      |            |         | 140 153 729.81 1457.61 1457.64 -0.03 0 56 0.0001869 K.SGAEAGTPEDSPNR.S |                                                                             |             |                     |                    |               |
|             |          |       |                   |        |     |                    |                                                               |                                       |       |        |       |      |            |         | 224 237 686.31 1370.6 1370.63 -0.03 0 60 7.64E-05 K.SGAEEQGPIDGPKS.S   |                                                                             |             |                     |                    |               |
| 13.69       |          |       |                   |        |     |                    |                                                               |                                       |       |        |       |      |            |         |                                                                        |                                                                             |             |                     |                    |               |
| P42224      | 5%       | 162   | 4                 | 87850  | 5.7 | P42224 STAT1_HUMAN | Signal transducer and activator of transcription 1-alpha/beta | OS=Homo sapiens GN=STAT1 PE=1 SV=2    |       |        |       |      |            |         |                                                                        | 20                                                                          | 6           | 1                   |                    |               |
|             |          |       |                   |        |     |                    |                                                               |                                       |       |        |       |      |            |         | 351 359 567.8 1133.58 1133.61 -0.03 0 46 0.0020539 K.LQELNLYNK.V       |                                                                             |             |                     |                    |               |
|             |          |       |                   |        |     |                    |                                                               |                                       |       |        |       |      |            |         | 362 371 412.2 1233.59 1233.64 -0.05 1 32 0.0473102 K.VLFDKDVNER.N      |                                                                             |             |                     |                    |               |
|             |          |       |                   |        |     |                    |                                                               |                                       |       |        |       |      |            |         | 593 602 587.8 1173.59 1173.61 -0.02 0 36 0.0210594 K.DQQPGTFLLR.F      |                                                                             |             |                     |                    |               |
| 21.27       |          |       |                   |        |     |                    |                                                               |                                       |       |        |       |      |            |         |                                                                        |                                                                             |             |                     |                    |               |
| 15.43       |          |       |                   |        |     |                    |                                                               |                                       |       |        |       |      |            |         |                                                                        |                                                                             |             |                     |                    |               |
| P16671      | 5%       | 114   | 3                 | 53589  | 8.2 | P16671 CD36_HUMAN  | Platelet glycoprotein 4                                       | OS=Homo sapiens GN=CD36 PE=1 SV=2     |       |        |       |      |            |         |                                                                        | 13.12                                                                       | 6           | 1                   |                    |               |
|             |          |       |                   |        |     |                    |                                                               |                                       |       |        |       |      |            |         | 57 63 413.2 824.38 824.4 -0.02 0 33 0.0297081 K.TGTEVYR.Q              |                                                                             |             |                     | Oxidation (M)      |               |
|             |          |       |                   |        |     |                    |                                                               |                                       |       |        |       |      |            |         | 167 173 435.7 869.38 869.41 -0.02 0 38 0.0101111 K.SSMFQYR.T           |                                                                             |             |                     |                    |               |
|             |          |       |                   |        |     |                    |                                                               |                                       |       |        |       |      |            |         | 224 231 461.76 921.5 921.52 -0.02 0 44 0.0029435 K.VAIIDTYK.G          |                                                                             |             |                     |                    |               |
| 19.73       |          |       |                   |        |     |                    |                                                               |                                       |       |        |       |      |            |         |                                                                        |                                                                             |             |                     |                    |               |
| P16070      | 3%       | 137   | 2                 | 82017  | 5.1 | P16070 CD44_HUMAN  | CD44 antigen                                                  | OS=Homo sapiens GN=CD44 PE=1 SV=2     |       |        |       |      |            |         | 12.97                                                                  | 6                                                                           | 2           |                     |                    |               |
|             |          |       |                   |        |     |                    |                                                               |                                       |       |        |       |      |            |         |                                                                        |                                                                             |             |                     |                    |               |

| accession # | coverage | score   | distinct peptides | mass  | pl  | start AA                                                                           | end AA    | m/z obs       | M obs   | M calc  | delta | miss                                                               | pept score | exp val               | peptide             | modifications | retent time | Strongest gel slice | # gel slices found |           |               |                   |              |       |       |   |   |
|-------------|----------|---------|-------------------|-------|-----|------------------------------------------------------------------------------------|-----------|---------------|---------|---------|-------|--------------------------------------------------------------------|------------|-----------------------|---------------------|---------------|-------------|---------------------|--------------------|-----------|---------------|-------------------|--------------|-------|-------|---|---|
| P27824      | 3%       | 82      | 2                 | 67982 | 4.5 | 27824 CALX_HUMAN Calnexin OS=Homo sapiens                                          | 47 54     | 454.2         | 906.39  | 906.41  | -0.03 | 0                                                                  | 34         | 0.0304601             | R.TEAADLCK.A        |               | 13.21       | 6                   | 1                  |           |               |                   |              |       |       |   |   |
|             |          |         |                   |       |     | 682 694                                                                            | 672.33    | 1342.64       | 1342.68 | -0.04   | 0     | 102                                                                | 4.13E-09   | K.LVINSNGNAVEDR.K     |                     | 16.6          |             |                     |                    |           |               |                   |              |       |       |   |   |
|             |          |         |                   |       |     | 211 217                                                                            | 420.2     | 838.38        | 838.41  | -0.03   | 0     | 31                                                                 | 0.0473221  | K.TGIYEK.H            |                     | 13.6          |             |                     |                    |           |               |                   |              |       |       |   |   |
| 574 582     | 544.76   | 1087.5  | 1087.51           | -0.02 | 0   | 51                                                                                 | 0.0007043 | K.AEEDEILNR.S |         | 17.17   |       |                                                                    |            |                       |                     |               |             |                     |                    |           |               |                   |              |       |       |   |   |
| P11021      | 20%      | 845     | 13                | 72402 | 5.1 | 11021 GRP78_HUMAN 78 kDa glucose-regulated protein OS=Homo sapiens                 | 47 60     | 519.26        | 1554.76 | 1554.79 | -0.03 | 1                                                                  | 59         | 8.10E-05              | K.NGRVEIHANDQGNR.I  |               | 13.99       | 7                   | 1                  |           |               |                   |              |       |       |   |   |
|             |          |         |                   |       |     | 50 60                                                                              | 614.81    | 1227.6        | 1227.62 | -0.02   | 0     | 70                                                                 | 9.23E-06   | R.VEIHANDQGNR.I       |                     | 14.87         |             |                     |                    |           |               |                   |              |       |       |   |   |
|             |          |         |                   |       |     | 61 74                                                                              | 783.88    | 1565.75       | 1565.77 | -0.02   | 0     | 76                                                                 | 1.57E-06   | R.ITPSYVAFTEPER.L     |                     | 20.7          |             |                     |                    |           |               |                   |              |       |       |   |   |
|             |          |         |                   |       |     | 82 96                                                                              | 839.39    | 1676.77       | 1676.8  | -0.03   | 0     | 92                                                                 | 4.53E-08   | K.NQLTSPNPENTVFDK.R   |                     | 20.16         |             |                     |                    |           |               |                   |              |       |       |   |   |
|             |          |         |                   |       |     | 82 97                                                                              | 611.96    | 1832.86       | 1832.9  | -0.04   | 1     | 86                                                                 | 1.68E-07   | K.NQLTSPNPENTVFDK.R.L |                     | 19.59         |             |                     |                    |           |               |                   |              |       |       |   |   |
|             |          |         |                   |       |     | 123 138                                                                            | 578.3     | 1731.87       | 1731.95 | -0.08   | 1     | 44                                                                 | 0.0026621  | K.KTKPYIQVDIGGGQTK.T  |                     | 16.83         |             |                     |                    |           |               |                   |              |       |       |   |   |
|             |          |         |                   |       |     | 124 138                                                                            | 535.61    | 1603.82       | 1603.86 | -0.03   | 0     | 59                                                                 | 9.43E-05   | K.TKPYIQVDIGGGQTK.T   |                     | 19.63         |             |                     |                    |           |               |                   |              |       |       |   |   |
|             |          |         |                   |       |     | 186 197                                                                            | 617.31    | 1232.6        | 1232.62 | -0.02   | 0     | 59                                                                 | 9.07E-05   | K.DAGTIAGLNMV.R.I     | Oxidation (M)       | 20.08         |             |                     |                    |           |               |                   |              |       |       |   |   |
|             |          |         |                   |       |     | 345 352                                                                            | 459.73    | 917.45        | 917.47  | -0.02   | 0     | 33                                                                 | 0.0468292  | K.VLESDLK.K           |                     | 14.65         |             |                     |                    |           |               |                   |              |       |       |   |   |
|             |          |         |                   |       |     | 448 464                                                                            | 918.96    | 1835.9        | 1835.93 | -0.03   | 0     | 97                                                                 | 1.21E-08   | K.SQIFSTASDNQPTVIK.V  |                     | 20.34         |             |                     |                    |           |               |                   |              |       |       |   |   |
|             |          |         |                   |       |     | 524 532                                                                            | 537.76    | 1073.51       | 1073.55 | -0.03   | 0     | 51                                                                 | 0.0006573  | K.ITITNDQNR.L         |                     | 13.55         |             |                     |                    |           |               |                   |              |       |       |   |   |
|             |          |         |                   |       |     | 563 573                                                                            | 658.81    | 1315.61       | 1315.63 | -0.02   | 0     | 47                                                                 | 0.0016499  | R.NELESYAYSLK.N       |                     | 21.01         |             |                     |                    |           |               |                   |              |       |       |   |   |
|             |          |         |                   |       |     | 622 633                                                                            | 699.39    | 1396.77       | 1396.78 | -0.01   | 0     | 47                                                                 | 0.0013293  | K.ELEEIVQPIISK.L      |                     | 21.27         |             |                     |                    |           |               |                   |              |       |       |   |   |
|             |          |         |                   |       |     | P26038                                                                             | 18%       | 560           | 12      | 67892   | 6.1   | 26038 MOES_HUMAN Moesin OS=Homo sapiens                            | 28 35      | 488.77                | 975.52              | 975.54        | -0.02       |                     |                    | 0         | 44            | 0.0030829         | K.QLFDQVVK.T |       | 20.39 | 7 | 1 |
|             |          |         |                   |       |     |                                                                                    |           |               |         |         |       | 101 107                                                            | 447.77     | 893.52                | 893.54              | -0.02         | 0           |                     |                    | 37        | 0.0134653     | R.LFFLQVK.E       |              | 22.11 |       |   |   |
|             |          |         |                   |       |     |                                                                                    |           |               |         |         |       | 144 156                                                            | 473.25     | 1416.74               | 1416.77             | -0.03         | 1           |                     |                    | 54        | 0.0003214     | K.SGYLAGDKLLPQR.V |              | 19.94 |       |   |   |
| 185 193     | 540.28   | 1078.55 | 1078.55           | -0.01 | 0   |                                                                                    |           |               |         |         |       | 45                                                                 | 0.0024334  | R.EDAVLEYL.I          |                     | 21.36         |             |                     |                    |           |               |                   |              |       |       |   |   |
| 295 306     | 496.92   | 1487.73 | 1487.78           | -0.05 | 1   |                                                                                    |           |               |         |         |       | 55                                                                 | 0.000236   | R.RKPDTEVQQMK.A       | Oxidation (M)       | 12.59         |             |                     |                    |           |               |                   |              |       |       |   |   |
| 296 306     | 444.88   | 1331.63 | 1331.68           | -0.05 | 0   |                                                                                    |           |               |         |         |       | 55                                                                 | 0.0002393  | R.KPDTIEVQQMK.A       | Oxidation (M)       | 12.94         |             |                     |                    |           |               |                   |              |       |       |   |   |
| 360 371     | 505.92   | 1514.74 | 1514.78           | -0.04 | 2   |                                                                                    |           |               |         |         |       | 48                                                                 | 0.0010163  | K.KAQEELEEQTRR.A      |                     | 12.5          |             |                     |                    |           |               |                   |              |       |       |   |   |
| 372 379     | 494.24   | 986.47  | 986.5             | -0.03 | 0   |                                                                                    |           |               |         |         |       | 40                                                                 | 0.0097279  | R.ALELEQR.K           |                     | 16.05         |             |                     |                    |           |               |                   |              |       |       |   |   |
| 394 408     | 558.28   | 1671.81 | 1671.84           | -0.03 | 1   |                                                                                    |           |               |         |         |       | 38                                                                 | 0.0114116  | R.QEAEAKALLQASR.D     |                     | 19.68         |             |                     |                    |           |               |                   |              |       |       |   |   |
| 449 458     | 603.78   | 1205.54 | 1205.56           | -0.02 | 0   |                                                                                    |           |               |         |         |       | 57                                                                 | 0.0001552  | K.AQMVEDLEK.T         | Oxidation (M)       | 13.86         |             |                     |                    |           |               |                   |              |       |       |   |   |
| 449 460     | 488.56   | 1462.66 | 1462.71           | -0.05 | 1   |                                                                                    |           |               |         |         |       | 34                                                                 | 0.0284899  | K.AQMVEDLEKTR.A       | Oxidation (M)       | 13.77         |             |                     |                    |           |               |                   |              |       |       |   |   |
| 569 577     | 585.75   | 1169.49 | 1169.5            | -0.01 | 1   |                                                                                    |           |               |         |         |       | 57                                                                 | 0.0001382  | K.QRIDEFESM.-         | Oxidation (M)       | 17.83         |             |                     |                    |           |               |                   |              |       |       |   |   |
| P38646      | 7%       | 218     | 4                 | 73920 | 5.9 |                                                                                    |           |               |         |         |       | 38646 GRP75_HUMAN Stress-70 protein, mitochondrial OS=Homo sapiens | 77 85      | 479.74                | 957.47              | 957.49        | -0.02       | 0                   | 50                 | 0.0009056 | K.VLENAEGAR.T |                   | 13.02        | 7     | 1     |   |   |
|             |          |         |                   |       |     | 207 218                                                                            | 621.84    | 1241.66       | 1241.67 | -0.02   | 0     | 43                                                                 | 0.0040358  | K.DAGOISGLNLVLR.V     |                     | 21.1          |             |                     |                    |           |               |                   |              |       |       |   |   |
|             |          |         |                   |       |     | 293 307                                                                            | 569.6     | 1705.78       | 1705.83 | -0.05   | 1     | 43                                                                 | 0.003427   | R.ETGVDLTKDNMALQR.V   | Oxidation (M)       | 18.49         |             |                     |                    |           |               |                   |              |       |       |   |   |
|             |          |         |                   |       |     | 635 646                                                                            | 616.33    | 1230.64       | 1230.66 | -0.02   | 0     | 82                                                                 | 4.83E-07   | R.QAASSLQQASLK.L      |                     | 14.6          |             |                     |                    |           |               |                   |              |       |       |   |   |
|             |          |         |                   |       |     |                                                                                    |           |               |         |         |       |                                                                    |            |                       |                     |               |             |                     |                    |           |               |                   |              |       |       |   |   |
| P13667      | 7%       | 198     | 4                 | 73229 | 5   | 13667 PDIA4_HUMAN Protein disulfide-isomerase A4 OS=Homo sapiens                   | 96 103    | 506.23        | 1010.45 | 1010.47 | -0.02 | 0                                                                  | 40         | 0.0073958             | K.QFAPEYK.I         |               | 15.65       | 7                   | 1                  |           |               |                   |              |       |       |   |   |
|             |          |         |                   |       |     | 120 131                                                                            | 595.82    | 1189.62       | 1189.63 | -0.01   | 0     | 80                                                                 | 8.13E-07   | K.IDATSASVLSR.F       |                     | 19.72         |             |                     |                    |           |               |                   |              |       |       |   |   |
|             |          |         |                   |       |     | 235 245                                                                            | 567.28    | 1132.55       | 1132.56 | -0.01   | 0     | 39                                                                 | 0.0095739  | K.VDATAETDLAK.R       |                     | 15            |             |                     |                    |           |               |                   |              |       |       |   |   |
|             |          |         |                   |       |     | 350 362                                                                            | 729.87    | 1457.73       | 1457.75 | -0.03   | 0     | 41                                                                 | 0.0062304  | K.VSQGQLVVMQPEK.F     | Oxidation (M)       | 15.78         |             |                     |                    |           |               |                   |              |       |       |   |   |
| P33121      | 5%       | 117     | 3                 | 78919 | 6.8 | 33121 ACSL1_HUMAN Long-chain-fatty-acid--CoA ligase 1 OS=Homo sapiens              | 99 112    | 729.86        | 1457.7  | 1457.7  | 0     | 0                                                                  | 50         | 0.00068               | R.GIQVSNNGPCLGSR.K  |               | 19.15       | 7                   | 1                  |           |               |                   |              |       |       |   |   |
|             |          |         |                   |       |     | 208 216                                                                            | 507.79    | 1013.56       | 1013.58 | -0.02   | 0     | 33                                                                 | 0.0427782  | K.LLLEGVENK.L         |                     | 20.25         |             |                     |                    |           |               |                   |              |       |       |   |   |
|             |          |         |                   |       |     | 341 349                                                                            | 526.77    | 1051.52       | 1051.55 | -0.03   | 0     | 34                                                                 | 0.02668    | K.IGFFQGDIL.L         |                     | 21.45         |             |                     |                    |           |               |                   |              |       |       |   |   |
| P40939      | 4%       | 133     | 3                 | 83688 | 9.2 | 40939 ECH1_HUMAN Trifunctional enzyme subunit alpha, mitochondrial OS=Homo sapiens | 520 531   | 559.8         | 1117.59 | 1117.6  | -0.01 | 0                                                                  | 55         | 0.0002276             | K.DTSASAVAVGLK.Q    |               | 19.41       | 7                   | 1                  |           |               |                   |              |       |       |   |   |
|             |          |         |                   |       |     | 541 549                                                                            | 507.24    | 1012.46       | 1012.46 | 0       | 0     | 34                                                                 | 0.0279934  | K.DGPGFYTR.C          |                     | 18.66         |             |                     |                    |           |               |                   |              |       |       |   |   |
|             |          |         |                   |       |     | 720 728                                                                            | 520.77    | 1039.53       | 1039.53 | -0.01   | 0     | 43                                                                 | 0.0031116  | R.FVDLYGAQK.I         |                     | 20.03         |             |                     |                    |           |               |                   |              |       |       |   |   |
|             |          |         |                   |       |     |                                                                                    |           |               |         |         |       |                                                                    |            |                       |                     |               |             |                     |                    |           |               |                   |              |       |       |   |   |
| P51659      | 4%       | 127     | 2                 | 80092 | 9   | 51659 DHXB4_HUMAN Peroxisomal multifunctional enzyme type 2 OS=Homo sapiens        | 316 331   | 734.37        | 1466.72 | 1466.74 | -0.02 | 0                                                                  | 55         | 0.0002097             | R.ATSTATSGFAGAIQK.L |               | 19.54       | 7                   | 1                  |           |               |                   |              |       |       |   |   |
|             |          |         |                   |       |     | 544 555                                                                            | 696.34    | 1390.67       | 1390.68 | -0.01   | 0     | 72                                                                 | 5.00E-06   | R.VLQQFADNDVSR.F      |                     | 19.5          |             |                     |                    |           |               |                   |              |       |       |   |   |
|             |          |         |                   |       |     |                                                                                    |           |               |         |         |       |                                                                    |            |                       |                     |               |             |                     |                    |           |               |                   |              |       |       |   |   |
| Q13948      | 3%       | 134     | 2                 | 77636 | 5.3 | 13948 CASP_HUMAN Protein CASP OS=Homo sapiens                                      | 166 175   | 558.79        | 1115.57 | 1115.58 | -0.01 | 0                                                                  | 37         | 0.0154453             | K.NQAETIALEK.E      |               | 16.35       | 7                   | 1                  |           |               |                   |              |       |       |   |   |
|             |          |         |                   |       |     | 428 439                                                                            | 645.34    | 1288.66       | 1288.66 | -0.01   | 0     | 98                                                                 | 1.19E-08   | R.ITEA VATATEQR.E     |                     | 14.56         |             |                     |                    |           |               |                   |              |       |       |   |   |
|             |          |         |                   |       |     |                                                                                    |           |               |         |         |       |                                                                    |            |                       |                     |               |             |                     |                    |           |               |                   |              |       |       |   |   |
| P13796      | 25%      | 827     | 14                | 70815 | 5.2 | 13796 PLSL_HUMAN Platin-2 OS=Homo sapiens                                          |           |               |         |         |       |                                                                    |            |                       |                     | 8             | 2           |                     |                    |           |               |                   |              |       |       |   |   |





| accession # | coverage | score  | distinct peptides | mass    | pl    | start AA           | end AA                                                         | m/z obs                              | M obs                      | M calc | delta | miss | pept score | exp val | peptide | modifications | retent time | Strongest gel slice | # gel slices found |        |     |        |         |         |         |                   |                                |                                   |                               |                       |       |  |  |  |  |  |   |   |
|-------------|----------|--------|-------------------|---------|-------|--------------------|----------------------------------------------------------------|--------------------------------------|----------------------------|--------|-------|------|------------|---------|---------|---------------|-------------|---------------------|--------------------|--------|-----|--------|---------|---------|---------|-------------------|--------------------------------|-----------------------------------|-------------------------------|-----------------------|-------|--|--|--|--|--|---|---|
| P38606      | 9%       | 214    | 4                 | 68660   | 5.3   | P38606 VATA_HUMAN  | Vacuolar ATP synthase catalytic subunit A                      | OS=Homo sapiens GN=ATP6V1A PE=1 SV=2 |                            |        |       |      |            |         |         |               |             |                     | 8                  | 1      |     |        |         |         |         |                   |                                |                                   |                               |                       |       |  |  |  |  |  |   |   |
|             |          |        |                   |         |       |                    |                                                                |                                      |                            |        |       |      |            |         |         |               |             |                     |                    |        | 221 | 232    | 439.57  | 1315.67 | 1315.74 | -0.06             | 0                              | 34                                | 0.0305815                     | K.LPANHPLLTGQR.V      | 14.73 |  |  |  |  |  |   |   |
|             |          |        |                   |         |       |                    |                                                                |                                      |                            |        |       |      |            |         |         |               |             |                     |                    |        | 257 | 265    | 481.76  | 961.51  | 961.54  | -0.03             | 0                              | 48                                | 0.0013564                     | K.TVISQSLSK.Y         | 15.22 |  |  |  |  |  |   |   |
|             |          |        |                   |         |       |                    |                                                                |                                      |                            |        |       |      |            |         |         |               |             |                     |                    |        | 309 | 323    | 766.37  | 1530.73 | 1530.78 | -0.05             | 0                              | 77                                | 1.36E-06                      | R.TALVANTSNMMPVAAR.E  | 14.87 |  |  |  |  |  |   |   |
|             |          |        |                   |         |       |                    |                                                                |                                      |                            |        |       |      |            |         |         |               |             |                     |                    |        | 365 | 381    | 899.4   | 1796.79 | 1796.84 | -0.05             | 0                              | 55                                | 0.0001816                     | R.LAEMPADSGYPVALGAR.L | 20.51 |  |  |  |  |  |   |   |
| P11117      | 7%       | 142    | 3                 | 48713   | 6.3   | P11117 PPAL_HUMAN  | Lysosomal acid phosphatase                                     | OS=Homo sapiens GN=ACP2 PE=1 SV=3    |                            |        |       |      |            |         |         |               |             |                     | 8                  | 1      |     |        |         |         |         |                   |                                |                                   |                               |                       |       |  |  |  |  |  |   |   |
|             |          |        |                   |         |       |                    |                                                                |                                      |                            |        |       |      |            |         |         |               |             |                     |                    |        | 35  | 41     | 456.26  | 910.5   | 910.53  | -0.03             | 0                              | 38                                | 0.0085231                     | R.FVTLTLR.H           | 21.13 |  |  |  |  |  |   |   |
|             |          |        |                   |         |       |                    |                                                                |                                      |                            |        |       |      |            |         |         |               |             |                     |                    |        | 242 | 252    | 672.33  | 1342.65 | 1342.69 | -0.04             | 0                              | 56                                | 0.0001969                     | R.FLFGIYQAEK.A        | 22.02 |  |  |  |  |  |   |   |
|             |          |        |                   |         |       |                    |                                                                |                                      |                            |        |       |      |            |         |         |               |             |                     |                    |        | 255 | 265    | 584.34  | 1166.67 | 1166.71 | -0.04             | 0                              | 48                                | 0.0011214                     | R.LQGGVLLAQIR.K       | 21.09 |  |  |  |  |  |   |   |
| Q8TBA6      | 6%       | 240    | 4                 | 82997   | 5.6   | Q8TBA6 GOGA5_HUMAN | Golgin subfamily A member 5                                    | OS=Homo sapiens GN=GOLGA5 PE=1 SV=2  |                            |        |       |      |            |         |         |               |             |                     | 8                  | 1      |     |        |         |         |         |                   |                                |                                   |                               |                       |       |  |  |  |  |  |   |   |
|             |          |        |                   |         |       |                    |                                                                |                                      |                            |        |       |      |            |         |         |               |             |                     |                    |        | 308 | 318    | 637.33  | 1272.64 | 1272.67 | -0.03             | 0                              | 60                                | 6.99E-05                      | R.LQEADQLLSTR.T       | 20.15 |  |  |  |  |  |   |   |
|             |          |        |                   |         |       |                    |                                                                |                                      |                            |        |       |      |            |         |         |               |             |                     |                    |        | 526 | 537    | 478.23  | 1431.68 | 1431.72 | -0.04             | 1                              | 37                                | 0.0136444                     | K.ASKQELTELEL.R       | 16.41 |  |  |  |  |  |   |   |
|             |          |        |                   |         |       |                    |                                                                |                                      |                            |        |       |      |            |         |         |               |             |                     |                    |        | 578 | 590    | 732.83  | 1463.64 | 1463.69 | -0.05             | 0                              | 85                                | 1.92E-07                      | K.TLSNSQSQSELENR.L    | 14.03 |  |  |  |  |  |   |   |
|             |          |        |                   |         |       |                    |                                                                |                                      |                            |        |       |      |            |         |         |               |             |                     |                    |        | 602 | 612    | 641.79  | 1281.57 | 1281.61 | -0.05             | 0                              | 60                                | 6.40E-05                      | K.QTMLLESLSTEK.N      | 16.54 |  |  |  |  |  |   |   |
| P29401      | 6%       | 142    | 2                 | 68519   | 7.6   | P29401 TKT_HUMAN   | Transketolase                                                  | OS=Homo sapiens GN=TKT PE=1 SV=3     |                            |        |       |      |            |         |         |               |             | 8                   | 1                  |        |     |        |         |         |         |                   |                                |                                   |                               |                       |       |  |  |  |  |  |   |   |
|             |          |        |                   |         |       |                    |                                                                |                                      |                            |        |       |      |            |         |         |               |             |                     |                    | 187    | 204 | 695.66 | 2083.95 | 2084    | -0.05   | 0                 | 37                             | 0.0110229                         | R.LQGSDPAPLQHQMIDIYQK.R       | 18.38                 |       |  |  |  |  |  |   |   |
|             |          |        |                   |         |       |                    |                                                                |                                      |                            |        |       |      |            |         |         |               |             |                     |                    | 439    | 456 | 942.94 | 1883.86 | 1883.92 | -0.06   | 0                 | 104                            | 2.16E-09                          | R.SVPTSTVFYPSDGVATEK.A        | 20.46                 |       |  |  |  |  |  |   |   |
| P23786      | 5%       | 75     | 2                 | 74244   | 8.4   | P23786 CPT2_HUMAN  | Carnitine O-palmitoyltransferase 2, mitochondrial              | OS=Homo sapiens GN=CPT2 PE=1 SV=2    |                            |        |       |      |            |         |         |               |             | 8                   | 1                  |        |     |        |         |         |         |                   |                                |                                   |                               |                       |       |  |  |  |  |  |   |   |
|             |          |        |                   |         |       |                    |                                                                |                                      |                            |        |       |      |            |         |         |               |             |                     |                    | 152    | 161 | 540.25 | 1078.49 | 1078.54 | -0.06   | 0                 | 33                             | 0.0390136                         | R.ATNMVTYSAIR.F               | 13.63                 |       |  |  |  |  |  |   |   |
|             |          |        |                   |         |       |                    |                                                                |                                      |                            |        |       |      |            |         |         |               |             |                     |                    | 390    | 414 | 863.39 | 2587.15 | 2587.26 | -0.11   | 0                 | 43                             | 0.0025772                         | K.DSTQTPAVTPQSQPATTDDSTVTVQKL | 18.29                 |       |  |  |  |  |  |   |   |
| Q07065      | 5%       | 73     | 2                 | 66097   | 5.6   | Q07065 CKAP4_HUMAN | Cytoskeleton-associated protein 4                              | OS=Homo sapiens GN=CKAP4 PE=1 SV=2   |                            |        |       |      |            |         |         |               |             | 8                   | 1                  |        |     |        |         |         |         |                   |                                |                                   |                               |                       |       |  |  |  |  |  |   |   |
|             |          |        |                   |         |       |                    |                                                                |                                      |                            |        |       |      |            |         |         |               |             |                     |                    | 273    | 287 | 549.59 | 1645.76 | 1645.82 | -0.05   | 1                 | 34                             | 0.0299955                         | K.VASLEESEGNKQDLK.A           | 13.85                 |       |  |  |  |  |  |   |   |
|             |          |        |                   |         |       |                    |                                                                |                                      |                            |        |       |      |            |         |         |               |             |                     |                    | 492    | 505 | 737.37 | 1472.72 | 1472.77 | -0.05   | 0                 | 40                             | 0.0080646                         | R.SVGEPLSTVESLQK.V            | 20.33                 |       |  |  |  |  |  |   |   |
| P49748      | 3%       | 104    | 2                 | 70745   | 8.9   | P49748 ACADV_HUMAN | Very long-chain specific acyl-CoA dehydrogenase, mitochondrial | OS=Homo sapiens GN=ACADV PE=1 SV=1   |                            |        |       |      |            |         |         |               |             | 8                   | 1                  |        |     |        |         |         |         |                   |                                |                                   |                               |                       |       |  |  |  |  |  |   |   |
|             |          |        |                   |         |       |                    |                                                                |                                      |                            |        |       |      |            |         |         |               |             |                     |                    | 265    | 276 | 578.8  | 1155.58 | 1155.61 | -0.04   | 0                 | 47                             | 0.0016425                         | K.TPVTDPATGAVK.E              | 14.16                 |       |  |  |  |  |  |   |   |
|             |          |        |                   |         |       |                    |                                                                |                                      |                            |        |       |      |            |         |         |               |             |                     |                    | 460    | 469 | 589.3  | 1176.59 | 1176.61 | -0.02   | 0                 | 58                             | 0.0001329                         | R.IFEGTNDILR.L                | 20.68                 |       |  |  |  |  |  |   |   |
| P10809      | 31%      | 1005   | 18                | 61187   | 5.7   | P10809 CH60_HUMAN  | 60 kDa heat shock protein, mitochondrial                       | OS=Homo sapiens GN=HSPD1 PE=1 SV=2   |                            |        |       |      |            |         |         |               |             | 9                   | 1                  |        |     |        |         |         |         |                   |                                |                                   |                               |                       |       |  |  |  |  |  |   |   |
|             |          |        |                   |         |       |                    |                                                                |                                      |                            |        |       |      |            |         |         |               |             |                     |                    | 97     | 121 | 854.06 | 2559.15 | 2559.24 | -0.09   | 0                 | 97                             | 9.51E-09                          | K.LVQDVANNITNEEAGDGTTTATVLR.S | 19.83                 |       |  |  |  |  |  |   |   |
|             |          |        |                   |         |       |                    |                                                                |                                      |                            |        |       |      |            |         |         |               |             |                     |                    | 206    | 218 | 760.85 | 1519.69 | 1519.74 | -0.05   | 0                 | 64                             | 2.60E-05                          | K.TLNDLEIIEGMK.F              | 21.74                 |       |  |  |  |  |  |   |   |
|             |          |        |                   |         |       |                    |                                                                |                                      |                            |        |       |      |            |         |         |               |             |                     |                    | 222    | 233 | 695.33 | 1388.65 | 1388.7  | -0.04   | 0                 | 44                             | 0.0029752                         | R.GYISPYFIINTSK.G             | 20.94                 |       |  |  |  |  |  |   |   |
|             |          |        |                   |         |       |                    |                                                                |                                      |                            |        |       |      |            |         |         |               |             |                     |                    | 237    | 249 | 801.36 | 1600.7  | 1600.74 | -0.05   | 0                 | 33                             | 0.0339172                         | K.CEFQDAVYLLSEK.K             | 21.92                 |       |  |  |  |  |  |   |   |
|             |          |        |                   |         |       |                    |                                                                |                                      |                            |        |       |      |            |         |         |               |             |                     |                    | 293    | 301 | 456.78 | 911.54  | 911.58  | -0.04   | 0                 | 62                             | 3.60E-05                          | K.VGLQVVAVK.A                 | 19.65                 |       |  |  |  |  |  |   |   |
|             |          |        |                   |         |       |                    |                                                                |                                      |                            |        |       |      |            |         |         |               |             |                     |                    | 302    | 309 | 417.18 | 832.35  | 832.38  | -0.03   | 0                 | 34                             | 0.033126                          | K.APGFGDNR.K                  | 13.54                 |       |  |  |  |  |  |   |   |
|             |          |        |                   |         |       |                    |                                                                |                                      |                            |        |       |      |            |         |         |               |             |                     |                    | 345    | 359 | 549.62 | 1645.83 | 1645.9  | -0.07   | 1                 | 55                             | 0.0002158                         | K.VGEVIVTKDDAMLLK.G           | 19.92                 |       |  |  |  |  |  |   |   |
|             |          |        |                   |         |       |                    |                                                                |                                      |                            |        |       |      |            |         |         |               |             |                     |                    | 397    | 405 | 451.25 | 900.49  | 900.53  | -0.04   | 0                 | 45                             | 0.0028391                         | K.LSDGVALVK.V                 | 18.67                 |       |  |  |  |  |  |   |   |
|             |          |        |                   |         |       |                    |                                                                |                                      |                            |        |       |      |            |         |         |               |             |                     |                    | 406    | 417 | 617.28 | 1232.54 | 1232.59 | -0.05   | 0                 | 74                             | 3.04E-06                          | K.VGGTSDVEVNEK.K              | 13.32                 |       |  |  |  |  |  |   |   |
|             |          |        |                   |         |       |                    |                                                                |                                      |                            |        |       |      |            |         |         |               |             |                     |                    | 406    | 418 | 454.55 | 1360.62 | 1360.68 | -0.06   | 1                 | 47                             | 0.0014652                         | K.VGGTSDVEVNEKK.D             | 12.67                 |       |  |  |  |  |  |   |   |
|             |          |        |                   |         |       |                    |                                                                |                                      |                            |        |       |      |            |         |         |               |             |                     |                    | 406    | 420 | 544.92 | 1631.74 | 1631.81 | -0.07   | 2                 | 87                             | 1.31E-07                          | K.VGGTSDVEVNEKKDR.V           | 12.49                 |       |  |  |  |  |  |   |   |
|             |          |        |                   |         |       |                    |                                                                |                                      |                            |        |       |      |            |         |         |               |             |                     |                    | 421    | 429 | 480.74 | 959.47  | 959.5   | -0.03   | 0                 | 51                             | 0.0007015                         | R.VTDALNATRA                  | 13.63                 |       |  |  |  |  |  |   |   |
|             |          |        |                   |         |       |                    |                                                                |                                      |                            |        |       |      |            |         |         |               |             |                     |                    | 447    | 462 | 886.4  | 1770.79 | 1770.85 | -0.05   | 0                 | 73                             | 3.29E-06                          | R.CIPALDSLTPANEDQK.I          | 20.77                 |       |  |  |  |  |  |   |   |
|             |          |        |                   |         |       |                    |                                                                |                                      |                            |        |       |      |            |         |         |               |             |                     |                    | 463    | 469 | 393.25 | 784.48  | 784.51  | -0.03   | 0                 | 36                             | 0.0191335                         | K.IGIEIIR                     | 20.45                 |       |  |  |  |  |  |   |   |
|             |          |        |                   |         |       |                    |                                                                |                                      |                            |        |       |      |            |         |         |               |             |                     |                    | 463    | 470 | 471.29 | 940.57  | 940.61  | -0.04   | 1                 | 54                             | 0.0002588                         | K.IGIEIIR.T                   | 19.52                 |       |  |  |  |  |  |   |   |
|             |          |        |                   |         |       |                    |                                                                |                                      |                            |        |       |      |            |         |         |               |             |                     |                    | 471    | 481 | 401.56 | 1201.66 | 1201.71 | -0.05   | 1                 | 52                             | 0.0004623                         | R.TLKIPAMTIK.N                | 16.88                 |       |  |  |  |  |  |   |   |
|             |          |        |                   |         |       |                    |                                                                |                                      |                            |        |       |      |            |         |         |               |             |                     |                    | 474    | 481 | 430.73 | 859.45  | 859.48  | -0.04   | 0                 | 46                             | 0.0024773                         | K.IPAMTIK.N                   | 13.28                 |       |  |  |  |  |  |   |   |
|             |          |        |                   |         |       |                    |                                                                |                                      |                            |        |       |      |            |         |         |               |             |                     |                    | 482    | 493 | 608.31 | 1214.6  | 1214.65 | -0.05   | 0                 | 50                             | 0.0007896                         | K.NAGVEGSLIVEK.I              | 19.47                 |       |  |  |  |  |  |   |   |
|             |          |        |                   |         |       |                    |                                                                |                                      |                            |        |       |      |            |         |         |               |             |                     |                    | P14618 | 25% | 570    | 10      | 58470   | 8       | P14618 KPYM_HUMAN | Pyruvate kinase isozymes M1/M2 | OS=Homo sapiens GN=PKM2 PE=1 SV=4 |                               |                       |       |  |  |  |  |  | 9 | 1 |
|             |          |        |                   |         |       |                    |                                                                |                                      |                            |        |       |      |            |         |         |               |             |                     |                    |        |     |        |         |         |         |                   |                                |                                   |                               |                       |       |  |  |  |  |  |   |   |
| 44          | 56       | 680.34 | 1358.66           | 1358.7  | -0.04 | 0                  | 63                                                             | 3.85E-05                             | R.NTGICTIGPASR.S           | 19.87  |       |      |            |         |         |               |             |                     |                    |        |     |        |         |         |         |                   |                                |                                   |                               |                       |       |  |  |  |  |  |   |   |
| 93          | 115      | 822.4  | 2464.19           | 2464.28 | -0.1  | 0                  | 77                                                             | 1.03E-06                             | R.TATESFASDPILYRPAVALDTK.G | 21.83  |       |      |            |         |         |               |             |                     |                    |        |     |        |         |         |         |                   |                                |                                   |                               |                       |       |  |  |  |  |  |   |   |
| 126         | 135      | 495.74 | 989.47            | 989.5   | -0.04 | 0                  | 55                                                             | 0.0002757                            | K.GSGTAEVLEK.K             | 14.07  |       |      |            |         |         |               |             |                     |                    |        |     |        |         |         |         |                   |                                |                                   |                               |                       |       |  |  |  |  |  |   |   |
| 142         | 151      | 607.28 | 1212.54           | 1212.57 | -0.02 | 0                  | 37                                                             | 0.0152698                            | K.ITLDNAVMEK.C             | 19.07  |       |      |            |         |         |               |             |                     |                    |        |     |        |         |         |         |                   |                                |                                   |                               |                       |       |  |  |  |  |  |   |   |
| 189         | 206      | 890.42 | 1778.82           | 1778.87 | -0.05 | 0                  | 83                                                             | 3.02E-07                             | K.GADFLVTEVENGSLGSK.K      | 21.57  |       |      |            |         |         |               |             |                     |                    |        |     |        |         |         |         |                   |                                |                                   |                               |                       |       |  |  |  |  |  |   |   |
| 208         | 224      | 818.93 | 1635.84           | 1635.88 | -0.05 | 0                  | 64                                                             | 2.62E-05                             | K.GVNLPGAADVLPASEK.D       | 20.99  |       |      |            |         |         |               |             |                     |                    |        |     |        |         |         |         |                   |                                |                                   |                               |                       |       |  |  |  |  |  |   |   |
| 295         | 305      | 571.29 | 1140.56           | 1140.6  | -0.04 | 0                  | 37                                                             | 0.0142217                            | R.GDLGIEIAEK.V             | 20.41  |       |      |            |         |         |               |             |                     |                    |        |     |        |         |         |         |                   |                                |                                   |                               |                       |       |  |  |  |  |  |   |   |
| 423         | 433      | 611.31 | 1220.6            | 1220.63 | -0.03 | 0                  | 62                                                             | 4.52E-05                             | K.CCSGAILVTK.S             | 20.18  |       |      |            |         |         |               |             |                     |                    |        |     |        |         |         |         |                   |                                |                                   |                               |                       |       |  |  |  |  |  |   |   |
| 490         | 498      | 498.24 | 994.46            | 994.49  | -0.03 | 0                  | 43                                                             | 0.0034558                            | R.VNFMNVGK.A               | 15.39  |       |      |            |         |         |               |             |                     |                    |        |     |        |         |         |         |                   |                                |                                   |                               |                       |       |  |  |  |  |  |   |   |
| Q02818      | 16%      | 367    | 8                 | 53846   | 5.2   | Q02818 NUCB1_HUMAN | Nucleobindin-1                                                 | OS=Homo sapiens GN=NUCB1 PE=1 SV=4   |                            |        |       |      |            |         |         |               | 9           | 1                   |                    |        |     |        |         |         |         |                   |                                |                                   |                               |                       |       |  |  |  |  |  |   |   |
|             |          |        |                   |         |       |                    |                                                                |                                      |                            |        |       |      |            |         |         |               |             |                     | 153                |        |     |        |         |         |         |                   |                                |                                   |                               |                       |       |  |  |  |  |  |   |   |







| accession # | coverage | score | distinct peptides | mass  | pl  | start AA | end AA | m/z obs | M obs   | M calc  | delta | miss | pept score | exp val   | peptide              | modifications   | retent time | Strongest gel slice | # gel slices found |  |  |  |  |
|-------------|----------|-------|-------------------|-------|-----|----------|--------|---------|---------|---------|-------|------|------------|-----------|----------------------|-----------------|-------------|---------------------|--------------------|--|--|--|--|
| Q16181      | 9%       | 167   | 4                 | 50933 | 8.8 | 56       | 68     | 473.55  | 1417.62 | 1417.7  | -0.08 | 1    | 44         | 0.0025931 | R.FKIPGSPPEMGR.G     | Oxidation (M)   | 19.01       | 11                  | 1                  |  |  |  |  |
|             |          |       |                   |       |     | 80       | 89     | 568.79  | 1135.57 | 1135.61 | -0.04 | 0    | 37         | 0.0158967 | K.FLMANGLQVLM        | Oxidation (M)   | 19.55       |                     |                    |  |  |  |  |
|             |          |       |                   |       |     | 211      | 218    | 469.73  | 937.44  | 937.49  | -0.04 | 0    | 35         | 0.0178789 | K.LYSESLAR.Y         |                 | 15.39       |                     |                    |  |  |  |  |
|             |          |       |                   |       |     | 380      | 390    | 609.35  | 1216.68 | 1216.71 | -0.03 | 0    | 50         | 0.0006854 | K.FVISDLLVPK.D       |                 | 22.79       |                     |                    |  |  |  |  |
| P35613      | 6%       | 70    | 2                 | 42573 | 5.4 | 187      | 195    | 490.81  | 979.61  | 979.64  | -0.03 | 0    | 37         | 0.0123641 | K.VNIIPLIAK.A        |                 | 21.37       | 11                  | 1                  |  |  |  |  |
|             |          |       |                   |       |     | 353      | 364    | 813.29  | 1624.57 | 1624.61 | -0.04 | 0    | 33         | 0.0324465 | K.MEMEMEQVFMK.V      | 4 Oxidation (M) | 16.04       |                     |                    |  |  |  |  |
|             |          |       |                   |       |     | 372      | 381    | 396.86  | 1187.57 | 1187.61 | -0.05 | 1    | 47         | 0.0015842 | K.LKDSEALQR.R        |                 | 13.15       |                     |                    |  |  |  |  |
|             |          |       |                   |       |     | 417      | 425    | 537.76  | 1073.51 | 1073.55 | -0.03 | 0    | 50         | 0.0009053 | R.ILEQQNSSR.T        |                 | 12.76       |                     |                    |  |  |  |  |
| Q7LGA3      | 6%       | 106   | 2                 | 42140 | 8.8 | 174      | 187    | 470.92  | 1409.75 | 1409.79 | -0.04 | 1    | 36         | 0.0184181 | K.GGVLLKEDALPGQK.T   |                 | 18.27       | 11                  | 1                  |  |  |  |  |
|             |          |       |                   |       |     | 274      | 282    | 507.72  | 1013.43 | 1013.49 | -0.07 | 0    | 34         | 0.0294052 | R.FFVSSQGR.S         |                 | 16.35       |                     |                    |  |  |  |  |
|             |          |       |                   |       |     | 112      | 123    | 708.82  | 1415.63 | 1415.68 | -0.05 | 0    | 66         | 1.82E-05  | K.NNPVMSLQDQVRF      | Oxidation (M)   | 19.77       |                     |                    |  |  |  |  |
|             |          |       |                   |       |     | 170      | 178    | 612.3   | 1222.59 | 1222.64 | -0.05 | 0    | 42         | 0.0046672 | R.LVSYYYFLR.F        |                 | 22.13       |                     |                    |  |  |  |  |
| Q9BQE3      | 4%       | 79    | 2                 | 50548 | 5   | 113      | 121    | 543.29  | 1084.57 | 1084.61 | -0.04 | 0    | 46         | 0.0021143 | K.EIIDLVLDR.I        |                 | 22.22       | 11                  | 1                  |  |  |  |  |
|             |          |       |                   |       |     | 327      | 336    | 508.28  | 1014.54 | 1014.57 | -0.03 | 0    | 33         | 0.043828  | K.DVNAAIATIK.T       |                 | 20.13       |                     |                    |  |  |  |  |
|             |          |       |                   |       |     | 65       | 79     | 533.27  | 1596.79 | 1596.85 | -0.06 | 1    | 38         | 0.0108364 | R.KVGAENVAIPESR.H    |                 | 16.21       |                     |                    |  |  |  |  |
|             |          |       |                   |       |     | 66       | 79     | 735.36  | 1468.7  | 1468.75 | -0.06 | 0    | 65         | 2.18E-05  | K.VGAENVAIPESR.H     |                 | 19.47       |                     |                    |  |  |  |  |
| Q9Y6N5      | 13%      | 320   | 6                 | 50214 | 9.2 | 166      | 173    | 434.21  | 866.41  | 866.45  | -0.04 | 0    | 43         | 0.0029661 | K.IGSNYSVK.T         |                 | 13.38       | 12                  | 1                  |  |  |  |  |
|             |          |       |                   |       |     | 208      | 217    | 654.8   | 1307.59 | 1307.62 | -0.03 | 0    | 43         | 0.0035049 | K.IMYLSSEAYFR.K      | Oxidation (M)   | 21.24       |                     |                    |  |  |  |  |
|             |          |       |                   |       |     | 242      | 253    | 724.84  | 1447.67 | 1447.73 | -0.06 | 0    | 82         | 3.97E-07  | K.YADALQEIQER.N      |                 | 21.73       |                     |                    |  |  |  |  |
|             |          |       |                   |       |     | 397      | 409    | 754.84  | 1507.67 | 1507.72 | -0.05 | 0    | 49         | 0.0008806 | K.AEPLTFFPDQSK.E     |                 | 21.33       |                     |                    |  |  |  |  |
| Q9BS26      | 12%      | 225   | 5                 | 47341 | 5.1 | 141      | 148    | 479.24  | 956.46  | 956.49  | -0.03 | 0    | 36         | 0.0188441 | K.SDPIQEI.R          |                 | 17.34       | 12                  | 1                  |  |  |  |  |
|             |          |       |                   |       |     | 149      | 158    | 573.78  | 1145.54 | 1145.59 | -0.06 | 0    | 55         | 0.0002486 | R.DLAEITLDR.S        |                 | 20.93       |                     |                    |  |  |  |  |
|             |          |       |                   |       |     | 162      | 170    | 556.27  | 1110.53 | 1110.57 | -0.04 | 0    | 41         | 0.0052825 | R.NIIGYFEQK.D        |                 | 21.15       |                     |                    |  |  |  |  |
|             |          |       |                   |       |     | 314      | 327    | 781.35  | 1560.69 | 1560.76 | -0.08 | 0    | 57         | 0.0001185 | K.TPADCPVIAIDSF.R.H  |                 | 21.51       |                     |                    |  |  |  |  |
| P01891      | 11%      | 153   | 4                 | 41168 | 6.2 | 46       | 59     | 815.39  | 1628.77 | 1628.82 | -0.05 | 0    | 49         | 0.0007604 | R.FIAGVYDDTQFVR.F    |                 | 21.55       | 12                  | 2                  |  |  |  |  |
|             |          |       |                   |       |     | 60       | 68     | 498.7   | 995.39  | 995.43  | -0.04 | 0    | 33         | 0.0291622 | R.FDSDAASQR.M        |                 | 12.94       |                     |                    |  |  |  |  |
|             |          |       |                   |       |     | 100      | 106    | 387.21  | 772.4   | 772.44  | -0.04 | 0    | 38         | 0.0149764 | R.VDLGLTR.G          |                 | 19.43       |                     |                    |  |  |  |  |
|             |          |       |                   |       |     | 195      | 205    | 450.88  | 1349.63 | 1349.69 | -0.07 | 1    | 32         | 0.0455664 | R.YLENGKETLQR.T      |                 | 13.64       |                     |                    |  |  |  |  |
| P55084      | 11%      | 201   | 5                 | 51547 | 9.4 | 53       | 61     | 478.76  | 955.5   | 955.55  | -0.05 | 0    | 38         | 0.0111332 | R.NVVVDVGR.T         |                 | 16.65       | 12                  | 1                  |  |  |  |  |
|             |          |       |                   |       |     | 62       | 72     | 607.3   | 1212.59 | 1212.64 | -0.05 | 0    | 35         | 0.0216189 | R.TPFLSGTQVYK.D      |                 | 20.89       |                     |                    |  |  |  |  |
|             |          |       |                   |       |     | 118      | 128    | 533.25  | 1064.49 | 1064.51 | -0.03 | 0    | 41         | 0.0052894 | R.EAALGAGFSDK.T      |                 | 18.08       |                     |                    |  |  |  |  |
|             |          |       |                   |       |     | 239      | 247    | 568.75  | 1135.49 | 1135.55 | -0.06 | 0    | 47         | 0.001523  | R.LEQDEYALR.S        |                 | 17.95       |                     |                    |  |  |  |  |
| P49411      | 10%      | 219   | 4                 | 49852 | 7.3 | 339      | 348    | 623.28  | 1244.54 | 1244.54 | 0     | 0    | 40         | 0.0085431 | R.DFMVVSQDPK.D       | Oxidation (M)   | 19.08       |                     |                    |  |  |  |  |
|             |          |       |                   |       |     | 71       | 79     | 460.25  | 918.48  | 918.54  | -0.05 | 0    | 36         | 0.0216508 | K.TLTLAAITK.I        |                 | 16.43       | 12                  | 1                  |  |  |  |  |
|             |          |       |                   |       |     | 80       | 88     | 408.21  | 814.41  | 814.45  | -0.05 | 0    | 41         | 0.00672   | K.ILAEAGGAK.F        |                 | 12.85       |                     |                    |  |  |  |  |
|             |          |       |                   |       |     | 239      | 252    | 771.9   | 1541.79 | 1541.85 | -0.05 | 0    | 64         | 2.94E-05  | K.LLLDAVDYIIPV.PAR.D |                 | 21.64       |                     |                    |  |  |  |  |
| O60664      | 8%       | 196   | 3                 | 47189 | 5.3 | 316      | 327    | 593.3   | 1184.58 | 1184.61 | -0.03 | 0    | 80         | 8.24E-07  | R.AEAGDNLGALV.R.G    |                 | 20.13       |                     |                    |  |  |  |  |
|             |          |       |                   |       |     | 129      | 140    | 605.27  | 1208.52 | 1208.57 | -0.05 | 0    | 83         | 3.29E-07  | K.VSQAQEMVSSAK.D     | Oxidation (M)   | 12.55       | 12                  | 1                  |  |  |  |  |
|             |          |       |                   |       |     | 167      | 180    | 690.33  | 1378.64 | 1378.69 | -0.05 | 0    | 74         | 2.63E-06  | K.SVVTGQVQVGMGR.L    | Oxidation (M)   | 15.17       |                     |                    |  |  |  |  |
|             |          |       |                   |       |     | 231      | 238    | 528.74  | 1055.46 | 1055.5  | -0.05 | 0    | 39         | 0.0106615 | R.QEQSYFV.R.L        |                 | 17.43       |                     |                    |  |  |  |  |
| Q99536      | 7%       | 94    | 2                 | 42122 | 5.9 | 256      | 271    | 795.87  | 1589.72 | 1589.76 | -0.04 | 0    | 57         | 0.0001149 | K.GVDIVMDPLGSDTAK.G  |                 | 20.44       | 12                  | 1                  |  |  |  |  |
|             |          |       |                   |       |     | 383      | 393    | 597.82  | 1193.63 | 1193.67 | -0.04 | 1    | 36         | 0.0169435 | K.VLLVPGPEKEN.-      | Oxidation (M)   | 19.87       |                     |                    |  |  |  |  |
|             |          |       |                   |       |     |          |        |         |         |         |       |      |            |           |                      |                 |             |                     |                    |  |  |  |  |
|             |          |       |                   |       |     |          |        |         |         |         |       |      |            |           |                      |                 |             |                     |                    |  |  |  |  |

| accession # | coverage | score   | distinct peptides | mass    | pl    | start AA | end AA      | m/z obs  | M obs             | M calc  | delta   | miss    | pept score | exp val | peptide    | modifications | retent time                                | Strongest gel slice                      | # gel slices found |    |    |        |         |         |       |   |    |           |                         |                                        |       |    |   |
|-------------|----------|---------|-------------------|---------|-------|----------|-------------|----------|-------------------|---------|---------|---------|------------|---------|------------|---------------|--------------------------------------------|------------------------------------------|--------------------|----|----|--------|---------|---------|-------|---|----|-----------|-------------------------|----------------------------------------|-------|----|---|
| P50552      | 7%       | 82      | 2                 | 39976   | 9.1   | P50552   | VASP_HUMAN  | 258      | 273               | 836.33  | 1670.64 | 1670.71 | -0.07      | 0       | 44         | 0.00238       | R.SGGGLMEEMNAMLAR.R                        | 3 Oxidation (M)                          | 15.38              | 12 | 1  |        |         |         |       |   |    |           |                         |                                        |       |    |   |
|             |          |         |                   |         |       |          |             | 299      | 307               | 486.74  | 971.47  | 971.5   | -0.03      | 0       | 39         | 0.0100902     | R.VPAQSESVR.R                              |                                          |                    |    |    |        |         |         |       |   |    |           |                         |                                        |       |    |   |
|             |          |         |                   |         |       |          |             |          |                   |         |         |         |            |         |            |               |                                            |                                          |                    |    |    |        |         |         |       |   |    |           |                         |                                        |       |    |   |
|             |          |         |                   |         |       |          |             |          |                   |         |         |         |            |         |            |               |                                            |                                          |                    |    |    |        |         |         |       |   |    |           |                         |                                        |       |    |   |
| P22234      | 5%       | 84      | 2                 | 47790   | 7     | P22234   | PUR6_HUMAN  | 2        | 11                | 529.27  | 1056.53 | 1056.58 | -0.05      | 0       | 43         | 0.0042622     | M.ATAEVLNIGK.K                             | Acetyl (Protein N-term)<br>Oxidation (M) | 21.29              | 12 | 1  |        |         |         |       |   |    |           |                         |                                        |       |    |   |
|             |          |         |                   |         |       |          |             | 236      | 246               | 623.79  | 1245.56 | 1245.63 | -0.07      | 0       | 41         | 0.00567       | K.EVTPEGLQMVK.K                            |                                          |                    |    |    |        |         |         |       |   |    |           |                         |                                        |       |    |   |
|             |          |         |                   |         |       |          |             |          |                   |         |         |         |            |         |            |               |                                            |                                          |                    |    |    |        |         |         |       |   |    |           |                         |                                        |       |    |   |
|             |          |         |                   |         |       |          |             |          |                   |         |         |         |            |         |            |               |                                            |                                          |                    |    |    |        |         |         |       |   |    |           |                         |                                        |       |    |   |
| P39656      | 4%       | 82      | 2                 | 48893   | 5.4   | P39656   | OST48_HUMAN | 61       | 71                | 580.29  | 1158.56 | 1158.61 | -0.05      | 0       | 40         | 0.0079832     | K.TADDPQLSLIK.Y                            | modifications                            | 20.31              | 12 | 1  |        |         |         |       |   |    |           |                         |                                        |       |    |   |
|             |          |         |                   |         |       |          |             | 343      | 348               | 373.69  | 745.37  | 745.41  | -0.04      | 0       | 42         | 0.0062471     | R.IDPFFVR.T                                |                                          |                    |    |    |        |         |         |       |   |    |           |                         |                                        |       |    |   |
|             |          |         |                   |         |       |          |             |          |                   |         |         |         |            |         |            |               |                                            |                                          |                    |    |    |        |         |         |       |   |    |           |                         |                                        |       |    |   |
|             |          |         |                   |         |       |          |             |          |                   |         |         |         |            |         |            |               |                                            |                                          |                    |    |    |        |         |         |       |   |    |           |                         |                                        |       |    |   |
| P60709      | 51%      | 1267    | 16 (19)           | 42052   | 5.3   | P60709   | ACTB_HUMAN  | 2        | 18                | 919.37  | 1836.73 | 1836.79 | -0.06      | 0       | 96         | 1.74E-08      | M.DDDIAALVVDNNGSMCK.A                      | Acetyl (Protein N-term); Oxidation (M)   | 22.23              | 13 | 12 |        |         |         |       |   |    |           |                         |                                        |       |    |   |
|             |          |         |                   |         |       |          |             | 19       | 28                | 488.71  | 975.4   | 975.44  | -0.04      | 0       | 72         | 4.92E-06      | K.AGFAGDDAPR.A                             |                                          |                    |    |    |        |         |         |       |   |    |           |                         |                                        |       |    |   |
|             |          |         |                   |         |       |          |             | 40       | 50                | 401.84  | 1202.49 | 1202.55 | -0.06      | 0       | 54         | 0.0002883     | R.HQGVVMVGMGQK.D                           |                                          |                    |    |    |        |         |         |       |   |    |           |                         |                                        |       |    |   |
|             |          |         |                   |         |       |          |             | 51       | 61                | 599.74  | 1197.46 | 1197.51 | -0.05      | 0       | 58         | 0.0001044     | K.DSYVGDEAQQS.R                            |                                          |                    |    |    |        |         |         |       |   |    |           |                         |                                        |       |    |   |
|             |          |         |                   |         |       |          |             | 51       | 62                | 452.19  | 1353.54 | 1353.62 | -0.07      | 1       | 54         | 0.0003015     | K.DSYVGDEAQQS.R                            |                                          |                    |    |    |        |         |         |       |   |    |           |                         |                                        |       |    |   |
|             |          |         |                   |         |       |          |             | 85       | 95                | 505.9   | 1514.67 | 1514.74 | -0.07      | 0       | 72         | 4.73E-06      | K.IWHHTFYNELR.V                            |                                          |                    |    |    |        |         |         |       |   |    |           |                         |                                        |       |    |   |
|             |          |         |                   |         |       |          |             | 96       | 113               | 652     | 1952.98 | 1953.06 | -0.08      | 0       | 60         | 5.52E-05      | R.VAPEEHPVLLTEAPLNPK.A                     |                                          |                    |    |    |        |         |         |       |   |    |           |                         |                                        |       |    |   |
|             |          |         |                   |         |       |          |             | 148      | 177               | 800.63  | 3198.47 | 3198.6  | -0.13      | 0       | 75         | 1.31E-06      | R.TTGIVMDSGDGVTHTVPIYEGYALPH/Oxidation (M) |                                          |                    |    |    |        |         |         |       |   |    |           |                         |                                        |       |    |   |
|             |          |         |                   |         |       |          |             | 184      | 191               | 499.73  | 997.44  | 997.48  | -0.04      | 0       | 32         | 0.044512      | R.DLTDYLMK.I                               |                                          |                    |    |    |        |         |         |       |   |    |           |                         |                                        |       |    |   |
|             |          |         |                   |         |       |          |             | 197      | 206               | 566.75  | 1131.48 | 1131.52 | -0.04      | 0       | 51         | 0.0006101     | R.GYSFTTAE.R                               |                                          |                    |    |    |        |         |         |       |   |    |           |                         |                                        |       |    |   |
|             |          |         |                   |         |       |          |             | 239      | 254               | 895.93  | 1789.84 | 1789.88 | -0.04      | 0       | 105        | 1.88E-09      | K.SYELPDGQVITIGNER.F                       |                                          |                    |    |    |        |         |         |       |   |    |           |                         |                                        |       |    |   |
|             |          |         |                   |         |       |          |             | 291      | 312               | 787.03  | 2358.07 | 2358.15 | -0.08      | 1       | 136        | 1.32E-12      | R.KDLYANTVLSGGTTMYPGIADR.M                 |                                          |                    |    |    |        |         |         |       |   |    |           |                         |                                        |       |    |   |
|             |          |         |                   |         |       |          |             | 292      | 312               | 1116.17 | 2230.32 | 2230.06 | 0.26       | 0       | 149        | 7.39E-14      | K.DLYANTVLSGGTTMYPGIADR.M                  |                                          |                    |    |    |        |         |         |       |   |    |           |                         |                                        |       |    |   |
|             |          |         |                   |         |       |          |             | 313      | 326               | 527.58  | 1579.72 | 1579.79 | -0.08      | 1       | 46         | 0.0014444     | R.MQKEITALAPSTMK.I                         |                                          |                    |    |    |        |         |         |       |   |    |           |                         |                                        |       |    |   |
|             |          |         |                   |         |       |          |             | 316      | 326               | 581.3   | 1160.58 | 1160.61 | -0.04      | 0       | 44         | 0.0034499     | K.EITALAPSTMK.I                            |                                          |                    |    |    |        |         |         |       |   |    |           |                         |                                        |       |    |   |
|             |          |         |                   |         |       |          |             | 316      | 326               | 589.4   | 1176.79 | 1176.61 | 0.18       | 0       | 54         | 0.0003293     | K.EITALAPSTMK.I                            |                                          |                    |    |    |        |         |         |       |   |    |           |                         |                                        |       |    |   |
|             |          |         |                   |         |       |          |             | 360      | 372               | 750.31  | 1498.61 | 1498.67 | -0.05      | 0       | 99         | 8.32E-09      | K.QEYDESGPSIVHR.K                          |                                          |                    |    |    |        |         |         |       |   |    |           |                         |                                        |       |    |   |
|             |          |         |                   |         |       |          |             | 360      | 372               | 506.22  | 1515.64 | 1515.7  | -0.05      | 0       | 67         | 1.31E-05      | K.QEYDESGPSIVHR.K                          |                                          |                    |    |    |        |         |         |       |   |    |           |                         |                                        |       |    |   |
|             |          |         |                   |         |       |          |             | 360      | 372               | 758.96  | 1515.9  | 1515.7  | 0.21       | 0       | 117        | 1.40E-10      | K.QEYDESGPSIVHR.K                          |                                          |                    |    |    |        |         |         |       |   |    |           |                         |                                        |       |    |   |
|             |          |         |                   |         |       |          |             | P63261   | 51%               | 1267    | 16 (22) | 42108   | 5.3        | P63261  | ACTG_HUMAN | 2             | 18                                         |                                          |                    |    |    | 947.4  | 1892.79 | 1892.85 | -0.06 | 0 | 96 | 1.72E-08  | M.EEEEI AALVIDNNGSMCK.A | Acetyl (Protein N-term); Oxidation (M) | 23.3  | 13 | 1 |
|             |          |         |                   |         |       |          |             |          |                   |         |         |         |            |         |            | 19            | 28                                         |                                          |                    |    |    | 488.71 | 975.4   | 975.44  | -0.04 | 0 | 72 | 4.92E-06  | K.AGFAGDDAPR.A          |                                        |       |    |   |
| 40          | 50       | 396.51  | 1186.5            | 1186.56 | -0.06 | 0        | 46          |          |                   |         |         |         |            |         |            | 0.0019352     | R.HQGVVMVGMGQK.D                           |                                          |                    |    |    |        |         |         |       |   |    |           |                         |                                        |       |    |   |
| 40          | 50       | 401.84  | 1202.49           | 1202.55 | -0.06 | 0        | 54          |          |                   |         |         |         |            |         |            | 0.0002883     | R.HQGVVMVGMGQK.D                           |                                          |                    |    |    |        |         |         |       |   |    |           |                         |                                        |       |    |   |
| 40          | 50       | 602.4   | 1202.79           | 1202.55 | 0.23  | 0        | 51          |          |                   |         |         |         |            |         |            | 0.0006058     | R.HQGVVMVGMGQK.D                           |                                          |                    |    |    |        |         |         |       |   |    |           |                         |                                        |       |    |   |
| 51          | 61       | 599.74  | 1197.46           | 1197.51 | -0.05 | 0        | 58          |          |                   |         |         |         |            |         |            | 0.0001044     | K.DSYVGDEAQQS.R                            |                                          |                    |    |    |        |         |         |       |   |    |           |                         |                                        |       |    |   |
| 51          | 62       | 452.19  | 1353.54           | 1353.62 | -0.07 | 1        | 54          |          |                   |         |         |         |            |         |            | 0.0003015     | K.DSYVGDEAQQS.R                            |                                          |                    |    |    |        |         |         |       |   |    |           |                         |                                        |       |    |   |
| 85          | 95       | 505.9   | 1514.67           | 1514.74 | -0.07 | 0        | 72          |          |                   |         |         |         |            |         |            | 4.73E-06      | K.IWHHTFYNELR.V                            |                                          |                    |    |    |        |         |         |       |   |    |           |                         |                                        |       |    |   |
| 96          | 113      | 652.01  | 1953              | 1953.06 | -0.06 | 0        | 66          |          |                   |         |         |         |            |         |            | 1.47E-05      | R.VAPEEHPVLLTEAPLNPK.A                     |                                          |                    |    |    |        |         |         |       |   |    |           |                         |                                        |       |    |   |
| 148         | 177      | 800.63  | 3198.47           | 3198.6  | -0.13 | 0        | 75          |          |                   |         |         |         |            |         |            | 1.31E-06      | R.TTGIVMDSGDGVTHTVPIYEGYALPH/Oxidation (M) |                                          |                    |    |    |        |         |         |       |   |    |           |                         |                                        |       |    |   |
| 184         | 191      | 499.73  | 997.44            | 997.48  | -0.04 | 0        | 32          |          |                   |         |         |         |            |         |            | 0.044512      | R.DLTDYLMK.I                               |                                          |                    |    |    |        |         |         |       |   |    |           |                         |                                        |       |    |   |
| 197         | 206      | 566.75  | 1131.48           | 1131.52 | -0.04 | 0        | 51          |          |                   |         |         |         |            |         |            | 0.0006101     | R.GYSFTTAE.R                               |                                          |                    |    |    |        |         |         |       |   |    |           |                         |                                        |       |    |   |
| 239         | 254      | 896.05  | 1790.1            | 1789.88 | 0.21  | 0        | 106         |          |                   |         |         |         |            |         |            | 1.68E-09      | K.SYELPDGQVITIGNER.F                       |                                          |                    |    |    |        |         |         |       |   |    |           |                         |                                        |       |    |   |
| 291         | 312      | 787.03  | 2358.07           | 2358.15 | -0.08 | 1        | 136         |          |                   |         |         |         |            |         |            | 1.32E-12      | R.KDLYANTVLSGGTTMYPGIADR.M                 |                                          |                    |    |    |        |         |         |       |   |    |           |                         |                                        |       |    |   |
| 292         | 312      | 744.33  | 2229.98           | 2230.06 | -0.08 | 0        | 94          |          |                   |         |         |         |            |         |            | 2.05E-08      | K.DLYANTVLSGGTTMYPGIADR.M                  |                                          |                    |    |    |        |         |         |       |   |    |           |                         |                                        |       |    |   |
| 292         | 312      | 1116.17 | 2230.32           | 2230.06 | 0.26  | 0        | 149         |          |                   |         |         |         |            |         |            | 7.39E-14      | K.DLYANTVLSGGTTMYPGIADR.M                  |                                          |                    |    |    |        |         |         |       |   |    |           |                         |                                        |       |    |   |
| 313         | 326      | 527.58  | 1579.72           | 1579.79 | -0.08 | 1        | 46          |          |                   |         |         |         |            |         |            | 0.0014444     | R.MQKEITALAPSTMK.I                         |                                          |                    |    |    |        |         |         |       |   |    |           |                         |                                        |       |    |   |
| 316         | 326      | 581.3   | 1160.58           | 1160.61 | -0.04 | 0        | 44          |          |                   |         |         |         |            |         |            | 0.0034499     | K.EITALAPSTMK.I                            |                                          |                    |    |    |        |         |         |       |   |    |           |                         |                                        |       |    |   |
| 316         | 326      | 589.4   | 1176.79           | 1176.61 | 0.18  | 0        | 54          |          |                   |         |         |         |            |         |            | 0.0003293     | K.EITALAPSTMK.I                            |                                          |                    |    |    |        |         |         |       |   |    |           |                         |                                        |       |    |   |
| 360         | 372      | 750.31  | 1498.61           | 1498.67 | -0.05 | 0        | 99          |          |                   |         |         |         |            |         |            | 8.32E-09      | K.QEYDESGPSIVHR.K                          |                                          |                    |    |    |        |         |         |       |   |    |           |                         |                                        |       |    |   |
| 360         | 372      | 506.22  | 1515.64           | 1515.7  | -0.05 | 0        | 67          |          |                   |         |         |         |            |         |            | 1.31E-05      | K.QEYDESGPSIVHR.K                          |                                          |                    |    |    |        |         |         |       |   |    |           |                         |                                        |       |    |   |
| 360         | 372      | 758.96  | 1515.9            | 1515.7  | 0.21  | 0        | 117         | 1.40E-10 | K.QEYDESGPSIVHR.K |         |         |         |            |         |            |               |                                            |                                          |                    |    |    |        |         |         |       |   |    |           |                         |                                        |       |    |   |
| P30453      | 25%      | 425     | 7                 | 41314   | 5.9   | P30453   | 1A34_HUMAN  | 46       | 59                | 815.56  | 1629.1  | 1628.82 | 0.28       | 0       | 94         | 2.68E-08      | R.FIAVGYVDDTQFVR.F                         | modifications                            | 21.69              | 13 | 1  |        |         |         |       |   |    |           |                         |                                        |       |    |   |
|             |          |         |                   |         |       |          |             | 60       | 68                | 498.71  | 995.4   | 995.43  | -0.03      | 0       | 43         | 0.0029229     | R.FDSDAASQR.M                              |                                          |                    |    |    |        |         |         |       |   |    |           |                         |                                        |       |    |   |
|             |          |         |                   |         |       |          |             | 100      | 106               | 387.21  | 772.41  | 772.44  | -0.03      | 0       | 48         | 0.0017156     | R.VDLGTLR.G                                |                                          |                    |    |    |        |         |         |       |   |    |           |                         |                                        |       |    |   |
|             |          |         |                   |         |       |          |             | 122      | 132               | 621.73  | 1241.45 | 1241.48 | -0.03      | 0       | 48         | 0.0013373     | R.MYGCVDVGPDGR.F                           |                                          |                    |    |    |        |         |         |       |   |    |           |                         |                                        |       |    |   |
|             |          |         |                   |         |       |          |             | 195      | 205               | 450.88  | 1349.62 | 1349.69 | -0.07      | 1       | 49         | 0.0009764     | R.YLENGKELTQR.T                            |                                          |                    |    |    |        |         |         |       |   |    |           |                         |                                        |       |    |   |
|             |          |         |                   |         |       |          |             | 211      | 226               | 465.45  | 1857.78 | 1857.85 | -0.08      | 0       | 58         | 9.79E-05      | K.THMTTHAVSDHEATLR.C                       |                                          |                    |    |    |        |         |         |       |   |    |           |                         |                                        |       |    |   |
|             |          |         |                   |         |       |          |             | 244      | 267               | 879.7   | 2636.07 | 2636.18 | -0.12      | 0       | 85         | 1.62E-07      | R.DGEDQQTQDTELVELTRPAGDGTGFKQ.W            |                                          |                    |    |    |        |         |         |       |   |    |           |                         |                                        |       |    |   |
|             |          |         |                   |         |       |          |             |          |                   |         |         |         |            |         |            |               |                                            |                                          |                    |    |    |        |         |         |       |   |    |           |                         |                                        |       |    |   |
|             |          |         |                   |         |       |          |             |          |                   |         |         |         |            |         |            |               |                                            |                                          |                    |    |    |        |         |         |       |   |    |           |                         |                                        |       |    |   |
|             |          |         |                   |         |       |          |             | P00558   | 24%               | 405     | 8       | 44985   | 8.3        | P00558  | PGK1_HUMAN | 23            | 39                                         |                                          |                    |    |    | 683.31 | 2046.92 | 2046.99 | -0.07 | 1 | 41 | 0.0045166 | R.VDFNVPMKNQITNQR.I     | Oxidation (M)<br>Oxidation (M)         | 18.08 | 13 | 1 |
| 172         | 184      | 461.89  | 1382.63           | 1382.7  | -0.06 | 0        | 45          |          |                   |         |         |         |            |         |            | 0.002497      | R.AHSSMVG/VNLPQK.A                         |                                          |                    |    |    |        |         |         |       |   |    |           |                         |                                        |       |    |   |
| 193         | 199      | 442.71  | 883.41            | 883.44  | -0.04 | 0        | 32          |          |                   |         |         |         |            |         |            | 0.0437924     | K.ELNYFAK.A                                |                                          |                    |    |    |        |         |         |       |   |    |           |                         |                                        |       |    |   |
|             |          |         |                   |         |       |          |             |          |                   |         |         |         |            |         |            |               |                                            |                                          |                    |    |    |        |         |         |       |   |    |           |                         |                                        |       |    |   |









| accession # | coverage | score | distinct peptides | mass    | pl    | start AA | end AA      | m/z obs                                             | M obs           | M calc   | delta | miss | pept score | exp val | peptide | modifications | retent time | Strongest gel slice | # gel slices found |        |         |         |         |         |       |          |                   |                            |                           |       |
|-------------|----------|-------|-------------------|---------|-------|----------|-------------|-----------------------------------------------------|-----------------|----------|-------|------|------------|---------|---------|---------------|-------------|---------------------|--------------------|--------|---------|---------|---------|---------|-------|----------|-------------------|----------------------------|---------------------------|-------|
| P21796      | 27%      | 557   | 7                 | 30868   | 8.6   | P21796   | VDAC1_HUMAN | Voltage-dependent anion-selective channel protein 1 | OS=Homo sapiens | GN=VDAC1 | PE=1  | SV=2 |            |         |         |               |             | 17                  | 6                  |        |         |         |         |         |       |          |                   |                            |                           |       |
|             |          |       |                   |         |       |          |             |                                                     |                 |          |       |      |            |         |         |               |             |                     |                    | 33     | 53      | 730.32  | 2187.95 | 2188.01 | -0.07 | 1        | 107               | 1.11E-09                   | K.TKSENGLEFTSSGSANTETTK.V | 14.65 |
|             |          |       |                   |         |       |          |             |                                                     |                 |          |       |      |            |         |         |               |             |                     |                    | 35     | 53      | 980.42  | 1958.83 | 1958.87 | -0.04 | 0        | 91                | 4.93E-08                   | K.SENGLFTSSGSANTETTK.V    | 18.69 |
|             |          |       |                   |         |       |          |             |                                                     |                 |          |       |      |            |         |         |               |             |                     |                    | 97     | 109     | 700.82  | 1399.63 | 1399.66 | -0.03 | 0        | 83                | 3.38E-07                   | K.LTFDSSFSPNTGK.K         | 20.39 |
|             |          |       |                   |         |       |          |             |                                                     |                 |          |       |      |            |         |         |               |             |                     |                    | 97     | 110     | 510.24  | 1527.71 | 1527.76 | -0.05 | 1        | 51                | 0.0005362                  | K.LTFDSSFSPNTGK.N         | 19.62 |
|             |          |       |                   |         |       |          |             |                                                     |                 |          |       |      |            |         |         |               |             |                     |                    | 164    | 174     | 607.31  | 1212.6  | 1212.61 | -0.01 | 0        | 70                | 7.08E-06                   | R.VTQSNFAVGYK.T           | 18.17 |
|             |          |       |                   |         |       |          |             |                                                     |                 |          |       |      |            |         |         |               |             |                     |                    | 237    | 256     | 701.72  | 2102.13 | 2102.17 | -0.05 | 0        | 83                | 2.72E-07                   | K.VNNSSLIGLGYQTLPKGIK.L   | 20.52 |
| 257         | 266      | 515.8 | 1029.58           | 1029.61 | -0.03 | 0        | 72          | 5.15E-06                                            | K.LTLSALLDGGK.N | 21.79    |       |      |            |         |         |               |             |                     |                    |        |         |         |         |         |       |          |                   |                            |                           |       |
| P45880      | 22%      | 255   | 5                 | 32060   | 7.5   | P45880   | VDAC2_HUMAN | Voltage-dependent anion-selective channel protein 2 | OS=Homo sapiens | GN=VDAC2 | PE=1  | SV=2 |            |         |         |               | 17          | 2                   |                    |        |         |         |         |         |       |          |                   |                            |                           |       |
|             |          |       |                   |         |       |          |             |                                                     |                 |          |       |      |            |         |         |               |             |                     | 108                | 121    | 519.58  | 1555.73 | 1555.79 | -0.06   | 1     | 44       | 0.0024553         | K.LTFDFTFPNTGK.K           | 19.94                     |       |
|             |          |       |                   |         |       |          |             |                                                     |                 |          |       |      |            |         |         |               |             |                     | 178                | 185    | 470.72  | 939.42  | 939.46  | -0.03   | 0     | 32       | 0.040975          | R.NNFAVGYR.T               | 16.78                     |       |
|             |          |       |                   |         |       |          |             |                                                     |                 |          |       |      |            |         |         |               |             |                     | 236                | 247    | 647.33  | 1292.64 | 1292.66 | -0.02   | 0     | 73       | 3.54E-06          | K.YQLDPTASISAK.V           | 19.76                     |       |
|             |          |       |                   |         |       |          |             |                                                     |                 |          |       |      |            |         |         |               |             |                     | 248                | 267    | 701.72  | 2102.13 | 2102.15 | -0.02   | 0     | 34       | 0.0225638         | K.VNNSSLIGVGYQTLPKGVK.L    | 20.52                     |       |
|             |          |       |                   |         |       |          |             |                                                     |                 |          |       |      |            |         |         |               |             |                     | 268                | 277    | 508.79  | 1015.57 | 1015.59 | -0.02   | 0     | 72       | 5.86E-06          | K.LTLSALVDGK.S             | 21.07                     |       |
|             |          |       |                   |         |       |          |             |                                                     |                 |          |       |      |            |         |         |               |             |                     | 268                | 277    | 508.79  | 1015.57 | 1015.59 | -0.02   | 0     | 72       | 5.86E-06          | K.LTLSALVDGK.S             | 21.07                     |       |
| P50897      | 22%      | 349   | 4                 | 34627   | 6.1   | P50897   | PPT1_HUMAN  | Palmitoyl-protein thioesterase 1                    | OS=Homo sapiens | GN=PPT1  | PE=1  | SV=1 |            |         |         |               | 17          | 4                   |                    |        |         |         |         |         |       |          |                   |                            |                           |       |
|             |          |       |                   |         |       |          |             |                                                     |                 |          |       |      |            |         |         |               |             |                     | 105                | 122    | 1009.46 | 2016.9  | 2016.95 | -0.05   | 0     | 110      | 6.22E-10          | K.LQQGYNAMGFSQGGQFLR.A     | 20.43                     |       |
|             |          |       |                   |         |       |          |             |                                                     |                 |          |       |      |            |         |         |               |             |                     | 128                | 151    | 859.74  | 2576.21 | 2576.3  | -0.09   | 0     | 89       | 5.83E-08          | R.CPSPMINILSVGGHQGVFLPR.C  | 21.47                     |       |
|             |          |       |                   |         |       |          |             |                                                     |                 |          |       |      |            |         |         |               |             |                     | 166                | 174    | 462.73  | 923.45  | 923.47  | -0.02   | 0     | 57       | 0.0001183         | K.TLNLNAGAYS.K.V           | 13.34                     |       |
|             |          |       |                   |         |       |          |             |                                                     |                 |          |       |      |            |         |         |               |             |                     | 254                | 268    | 897.43  | 1792.84 | 1792.88 | -0.05   | 0     | 93       | 3.35E-08          | K.ETLPLQETSLYTQDR.L        | 20.48                     |       |
| P08758      | 21%      | 364   | 6                 | 35971   | 4.9   | P08758   | ANXA5_HUMAN | Annexin A5                                          | OS=Homo sapiens | GN=ANXA5 | PE=1  | SV=2 |            |         |         |               | 17          | 1                   |                    |        |         |         |         |         |       |          |                   |                            |                           |       |
|             |          |       |                   |         |       |          |             |                                                     |                 |          |       |      |            |         |         |               |             |                     | 30                 | 45     | 852.94  | 1703.86 | 1703.89 | -0.03   | 0     | 104      | 2.47E-09          | K.GLGTDEESILLLTSR.S        | 23.66                     |       |
|             |          |       |                   |         |       |          |             |                                                     |                 |          |       |      |            |         |         |               |             |                     | 51                 | 58     | 447.22  | 892.43  | 892.47  | -0.04   | 0     | 38       | 0.012352          | R.QEISAAFK.T               | 16.3                      |       |
|             |          |       |                   |         |       |          |             |                                                     |                 |          |       |      |            |         |         |               |             |                     | 109                | 117    | 501.29  | 1000.56 | 1000.59 | -0.03   | 0     | 54       | 0.0003654         | K.VLTEIIASR.T              | 19.89                     |       |
|             |          |       |                   |         |       |          |             |                                                     |                 |          |       |      |            |         |         |               |             |                     | 228                | 242    | 807.43  | 1612.84 | 1612.9  | -0.06   | 0     | 66       | 1.67E-05          | R.ETSGNLEQLLAVVK.S         | 23.97                     |       |
|             |          |       |                   |         |       |          |             |                                                     |                 |          |       |      |            |         |         |               |             |                     | 277                | 285    | 553.78  | 1105.55 | 1105.58 | -0.03   | 0     | 52       | 0.0005423         | R.SEIDLFNIR.K              | 21.74                     |       |
|             |          |       |                   |         |       |          |             |                                                     |                 |          |       |      |            |         |         |               |             |                     | 291                | 301    | 645.81  | 1289.6  | 1289.63 | -0.04   | 0     | 50       | 0.0006295         | K.NFATSLYSMIK.G            | 21.34                     |       |
| Q16698      | 18%      | 240   | 4                 | 36330   | 9.3   | Q16698   | DECR_HUMAN  | 2,4-dienoyl-CoA reductase, mitochondrial            | OS=Homo sapiens | GN=DECR1 | PE=1  | SV=1 |            |         |         |               | 17          | 1                   |                    |        |         |         |         |         |       |          |                   |                            |                           |       |
|             |          |       |                   |         |       |          |             |                                                     |                 |          |       |      |            |         |         |               |             |                     | 98                 | 110    | 667.8   | 1333.58 | 1333.65 | -0.07   | 0     | 87       | 1.51E-07          | K.ATAEQISSQTGNK.V          | 12.77                     |       |
|             |          |       |                   |         |       |          |             |                                                     |                 |          |       |      |            |         |         |               |             |                     | 120                | 133    | 802.86  | 1603.71 | 1603.78 | -0.07   | 0     | 40       | 0.0067519         | R.DPDMVQNTVSELIK.V         | 21.52                     |       |
|             |          |       |                   |         |       |          |             |                                                     |                 |          |       |      |            |         |         |               |             |                     | 134                | 155    | 764.37  | 2290.09 | 2290.18 | -0.09   | 0     | 77       | 1.10E-06          | K.VAGHPNIVINNAAGNFISPTER.L | 20.25                     |       |
|             |          |       |                   |         |       |          |             |                                                     |                 |          |       |      |            |         |         |               |             |                     | 235                | 244    | 556.81  | 1111.61 | 1111.64 | -0.03   | 0     | 36       | 0.0155792         | R.FNVIQPGPIK.T             | 20.21                     |       |
| P09525      | 13%      | 232   | 3                 | 36088   | 5.8   | P09525   | ANXA4_HUMAN | Annexin A4                                          | OS=Homo sapiens | GN=ANXA4 | PE=1  | SV=4 |            |         |         |               | 17          | 1                   |                    |        |         |         |         |         |       |          |                   |                            |                           |       |
|             |          |       |                   |         |       |          |             |                                                     |                 |          |       |      |            |         |         |               |             |                     | 10                 | 24     | 799.34  | 1596.66 | 1596.72 | -0.06   | 0     | 105      | 1.98E-09          | K.AASGFNAMEDAQTLR.K        | 19.18                     |       |
|             |          |       |                   |         |       |          |             |                                                     |                 |          |       |      |            |         |         |               |             |                     | 226                | 241    | 833.91  | 1665.8  | 1665.85 | -0.04   | 0     | 64       | 2.67E-05          | K.SETSGSFDALLAIVK.C        | 23.44                     |       |
|             |          |       |                   |         |       |          |             |                                                     |                 |          |       |      |            |         |         |               |             |                     | 260                | 270    | 587.79  | 1173.57 | 1173.6  | -0.03   | 0     | 63       | 3.98E-05          | K.GLGTDDNTLIR.V            | 19.53                     |       |
| P61247      | 13%      | 123   | 3                 | 30154   | 9.8   | P61247   | RS3A_HUMAN  | 40S ribosomal protein S3a                           | OS=Homo sapiens | GN=RPS3A | PE=1  | SV=2 |            |         |         |               | 17          | 1                   |                    |        |         |         |         |         |       |          |                   |                            |                           |       |
|             |          |       |                   |         |       |          |             |                                                     |                 |          |       |      |            |         |         |               |             |                     | 129                | 136    | 469.74  | 937.46  | 937.49  | -0.03   | 0     | 33       | 0.0315748         | K.TTDGYLLR.L               | 19.13                     |       |
|             |          |       |                   |         |       |          |             |                                                     |                 |          |       |      |            |         |         |               |             |                     | 175                | 187    | 505.92  | 1514.74 | 1514.79 | -0.05   | 1     | 48       | 0.0010642         | R.EVQTNLKEVVNK.L           | 16                        |       |
|             |          |       |                   |         |       |          |             |                                                     |                 |          |       |      |            |         |         |               |             |                     | 228                | 240    | 449.85  | 1346.53 | 1346.61 | -0.08   | 0     | 44       | 0.0029774         | K.LMELHGEGSSSGK.A          | 12.6                      |       |
| Q9H9B4      | 11%      | 167   | 3                 | 35881   | 9.2   | Q9H9B4   | SFXN1_HUMAN | Sideroflexin-1                                      | OS=Homo sapiens | GN=SFXN1 | PE=1  | SV=4 |            |         |         |               | 17          | 1                   |                    |        |         |         |         |         |       |          |                   |                            |                           |       |
|             |          |       |                   |         |       |          |             |                                                     |                 |          |       |      |            |         |         |               |             |                     | 36                 | 48     | 750.88  | 1499.75 | 1499.79 | -0.05   | 0     | 71       | 5.50E-06          | R.NILLTNEQLESAR.K          | 20.34                     |       |
|             |          |       |                   |         |       |          |             |                                                     |                 |          |       |      |            |         |         |               |             |                     | 203                | 214    | 635.81  | 1269.6  | 1269.63 | -0.03   | 0     | 44       | 0.0025867         | K.VGIPVTDENGNR.L           | 15.74                     |       |
|             |          |       |                   |         |       |          |             |                                                     |                 |          |       |      |            |         |         |               |             |                     | 224                | 233    | 550.81  | 1099.6  | 1099.63 | -0.04   | 0     | 52       | 0.0005715         | K.QAITQVVVSR.I             | 17.17                     |       |
| P54920      | 7%       | 92    | 2                 | 33667   | 5.2   | P54920   | SNAA_HUMAN  | Alpha-soluble NSF attachment protein                | OS=Homo sapiens | GN=NAPA  | PE=1  | SV=3 |            |         |         |               | 17          | 1                   |                    |        |         |         |         |         |       |          |                   |                            |                           |       |
|             |          |       |                   |         |       |          |             |                                                     |                 |          |       |      |            |         |         |               |             |                     | 107                | 116    | 592.77  | 1183.53 | 1183.55 | -0.03   | 0     | 34       | 0.0314689         | R.AIEIYDMDGR.F             | 19.22                     |       |
|             |          |       |                   |         |       |          |             |                                                     |                 |          |       |      |            |         |         |               |             |                     | 286                | 295    | 588.27  | 1174.53 | 1174.55 | -0.01   | 0     | 58       | 0.0001198         | K.TIQGDEEDLR.-             | 14.78                     |       |
| O00299      | 29%      | 372   | 6                 | 27248   | 5.1   | O00299   | CLIC1_HUMAN | Chloride intracellular channel protein 1            | OS=Homo sapiens | GN=CLIC1 | PE=1  | SV=4 |            |         |         |               | 18          | 1                   |                    |        |         |         |         |         |       |          |                   |                            |                           |       |
|             |          |       |                   |         |       |          |             |                                                     |                 |          |       |      |            |         |         |               |             |                     | 2                  | 13     | 729.85  | 1457.69 | 1457.74 | -0.05   | 0     | 65       | 2.47E-05          | M.AEEQPVLEFVK.A            | 21.82                     |       |
|             |          |       |                   |         |       |          |             |                                                     |                 |          |       |      |            |         |         |               |             |                     | 21                 | 29     | 539.74  | 1077.47 | 1077.5  | -0.03   | 0     | 43       | 0.0035285         | K.IGNCPFSQR.L              | 15.12                     |       |
|             |          |       |                   |         |       |          |             |                                                     |                 |          |       |      |            |         |         |               |             |                     | 38                 | 49     | 641.33  | 1280.64 | 1280.66 | -0.02   | 0     | 72       | 4.51E-06          | K.GVTFNVTVDTK.R            | 19.93                     |       |
|             |          |       |                   |         |       |          |             |                                                     |                 |          |       |      |            |         |         |               |             |                     | 96                 | 113    | 922.98  | 1843.95 | 1843.97 | -0.02   | 0     | 80       | 5.82E-07          | K.LAALNPESNTAGLDIFAK.F     | 21.73                     |       |
|             |          |       |                   |         |       |          |             |                                                     |                 |          |       |      |            |         |         |               |             |                     | 120                | 131    | 664.79  | 1327.56 | 1327.64 | -0.08   | 0     | 71       | 5.73E-06          | K.NSNPALNDNLEK.G           | 14.73                     |       |
|             |          |       |                   |         |       |          |             |                                                     |                 |          |       |      |            |         |         |               |             |                     | 209                | 216    | 479.24  | 956.47  | 956.47  | 0       | 0     | 40       | 0.0072975         | R.YLSNAYAR.E               | 14.3                      |       |
| P62258      | 16%      | 208   | 4                 | 29326   | 4.6   | P62258   | 1433E_HUMAN | 14-3-3 protein epsilon                              | OS=Homo sapiens | GN=YWHAE | PE=1  | SV=1 |            |         |         | 18            | 1           |                     |                    |        |         |         |         |         |       |          |                   |                            |                           |       |
|             |          |       |                   |         |       |          |             |                                                     |                 |          |       |      |            |         |         |               |             | 30                  | 42                 | 732.35 | 1462.68 | 1462.7  | -0.02   | 0       | 77    | 1.37E-06 | K.VAGMDVELTVEER.N | 19.54                      |                           |       |

| accession # | coverage | score | distinct peptides | mass  | pl  | start AA | end AA      | m/z obs | M obs | M calc | delta   | miss    | pept score | exp val | peptide | modifications | retent time            | Strongest gel slice                    | # gel slices found |       |  |
|-------------|----------|-------|-------------------|-------|-----|----------|-------------|---------|-------|--------|---------|---------|------------|---------|---------|---------------|------------------------|----------------------------------------|--------------------|-------|--|
| P23396      | 14%      | 162   | 3                 | 26842 | 9.7 | P23396   | RS3_HUMAN   | 43      | 50    | 454.25 | 906.48  | 906.52  | -0.04      | 0       | 37      | 0.0173382     | R.NLLSVAYK.N           |                                        | 20.11              |       |  |
|             |          |       |                   |       |     |          |             | 87      | 94    | 497.23 | 992.45  | 992.48  | -0.03      | 0       | 38      | 0.0113328     | R.QMVFTELK.L           | Oxidation (M)                          |                    | 13.56 |  |
|             |          |       |                   |       |     |          |             | 143     | 153   | 597.8  | 1193.58 | 1193.59 | -0.01      | 0       | 57      | 0.0001585     | K.EAAENSLVAYK.A        |                                        |                    | 17.76 |  |
| P27105      | 13%      | 224   | 4                 | 31882 | 7.7 | P27105   | STOM_HUMAN  | 19      | 27    | 546.78 | 1091.54 | 1091.56 | -0.02      | 0       | 59      | 8.58E-05      | K.AELNEFLTR.E          |                                        | 20.59              |       |  |
|             |          |       |                   |       |     |          |             | 46      | 54    | 515.3  | 1028.6  | 1028.62 | -0.03      | 0       | 34      | 0.036509      | R.TEHIILATR.T          | Oxidation (M)                          |                    | 20.68 |  |
|             |          |       |                   |       |     |          |             | 228     | 243   | 795.39 | 1588.77 | 1588.79 | -0.02      | 0       | 37      | 0.0134451     | K.GGKPEPPAMPQPVPTA.-   |                                        | 14.77              |       |  |
|             |          |       |                   |       |     |          |             | 206     | 215   | 511.73 | 1021.44 | 1021.45 | -0.01      | 0       | 36      | 0.0188134     | R.AMAAEAEASR.E         | Oxidation (M)                          |                    | 12.26 |  |
|             |          |       |                   |       |     |          |             | 219     | 232   | 488.23 | 1461.67 | 1461.72 | -0.05      | 1       | 57      | 0.0001245     | R.AKVIAAEGEMNASR.A     | Oxidation (M)                          |                    | 12.69 |  |
| P63104      | 22%      | 285   | 5                 | 27899 | 4.7 | P63104   | 1433Z_HUMAN | 221     | 232   | 632.29 | 1262.56 | 1262.59 | -0.03      | 0       | 79      | 1.02E-06      | K.VIAAEGEMNASR.A       | Oxidation (M)                          |                    | 12.95 |  |
|             |          |       |                   |       |     |          |             | 252     | 263   | 676.36 | 1350.7  | 1350.74 | -0.04      | 0       | 52      | 0.0003857     | R.VLQTLTIIAAEK.N       |                                        | 20.33              |       |  |
|             |          |       |                   |       |     |          |             | 1       | 9     | 581.79 | 1161.56 | 1161.57 | -0.01      | 1       | 60      | 7.98E-05      | .MDKNELVQK.A           | Acetyl (Protein N-term); Oxidation (M) |                    | 13.21 |  |
|             |          |       |                   |       |     |          |             | 28      | 41    | 774.85 | 1547.69 | 1547.71 | -0.02      | 0       | 84      | 2.65E-07      | K.SVTEQGAEELSNEER.N    |                                        | 14.25              |       |  |
|             |          |       |                   |       |     |          |             | 42      | 49    | 454.26 | 906.5   | 906.52  | -0.02      | 0       | 45      | 0.0023551     | R.NLLSVAYK.N           |                                        | 20.08              |       |  |
| P31946      | 21%      | 245   | 5                 | 28179 | 4.8 | P31946   | 1433B_HUMAN | 104     | 115   | 652.84 | 1303.66 | 1303.68 | -0.02      | 0       | 52      | 0.000468      | K.FLIPNASQAESK.V       |                                        | 19.95              |       |  |
|             |          |       |                   |       |     |          |             | 128     | 139   | 427.21 | 1278.61 | 1278.65 | -0.03      | 1       | 44      | 0.0029519     | R.YLAEVAAGDDKK.G       |                                        | 13.69              |       |  |
|             |          |       |                   |       |     |          |             | 2       | 11    | 618.8  | 1235.59 | 1235.61 | -0.02      | 1       | 35      | 0.0224089     | M.TMDKSELVQK.A         | Acetyl (Protein N-term); Oxidation (M) |                    | 13.43 |  |
|             |          |       |                   |       |     |          |             | 30      | 43    | 533.56 | 1597.66 | 1597.73 | -0.08      | 0       | 48      | 0.0012144     | K.AVTEQGHSELSNEER.N    |                                        | 12.9               |       |  |
|             |          |       |                   |       |     |          |             | 44      | 51    | 454.26 | 906.5   | 906.52  | -0.02      | 0       | 45      | 0.0023551     | R.NLLSVAYK.N           |                                        | 20.08              |       |  |
| P61981      | 20%      | 269   | 5                 | 28456 | 4.8 | P61981   | 1433G_HUMAN | 63      | 70    | 452.25 | 902.49  | 902.51  | -0.02      | 0       | 44      | 0.0035329     | R.VISSIEQK.T           |                                        | 13.34              |       |  |
|             |          |       |                   |       |     |          |             | 130     | 140   | 591.77 | 1181.53 | 1181.56 | -0.02      | 0       | 74      | 2.54E-06      | R.YLSEVASGDNK.Q        |                                        | 13.95              |       |  |
|             |          |       |                   |       |     |          |             | 2       | 10    | 578.82 | 1155.62 | 1155.62 | -0.01      | 1       | 50      | 0.0006769     | M.VDREQLVQK.A          | Acetyl (Protein N-term)                |                    | 15.34 |  |
|             |          |       |                   |       |     |          |             | 29      | 42    | 822.38 | 1642.74 | 1642.78 | -0.04      | 0       | 89      | 8.55E-08      | K.NVTELSNEPLSNEER.N    |                                        | 19.51              |       |  |
|             |          |       |                   |       |     |          |             | 43      | 50    | 454.26 | 906.5   | 906.52  | -0.02      | 0       | 45      | 0.0023551     | R.NLLSVAYK.N           |                                        | 20.08              |       |  |
| P07339      | 17%      | 389   | 8 (9)             | 45037 | 6.1 | P07339   | CATD_HUMAN  | 62      | 69    | 452.25 | 902.49  | 902.51  | -0.02      | 0       | 44      | 0.0035329     | R.VISSIEQK.T           |                                        | 13.34              |       |  |
|             |          |       |                   |       |     |          |             | 133     | 142   | 540.76 | 1079.51 | 1079.55 | -0.04      | 0       | 40      | 0.0061578     | R.YLAEVATGEK.R         |                                        | 15.29              |       |  |
|             |          |       |                   |       |     |          |             | 177     | 184   | 440.22 | 878.43  | 878.45  | -0.02      | 0       | 39      | 0.0093034     | R.QVFGEATK.Q           |                                        | 13.73              |       |  |
|             |          |       |                   |       |     |          |             | 177     | 194   | 636    | 1904.99 | 1905.04 | -0.04      | 1       | 47      | 0.0011034     | R.QVFGEATKQPGITFIAAK.F |                                        | 20.29              |       |  |
|             |          |       |                   |       |     |          |             | 185     | 194   | 514.78 | 1027.55 | 1027.57 | -0.02      | 0       | 35      | 0.0231177     | K.QPGITFIAAK.F         | Gln->pyro-Glu (N-term Q)               |                    | 21.43 |  |
|             |          |       |                   |       |     |          |             | 185     | 194   | 523.4  | 1044.79 | 1044.6  | 0.19       | 0       | 31      | 0.0489839     | K.QPGITFIAAK.F         |                                        | 20.25              |       |  |
|             |          |       |                   |       |     |          |             | 195     | 205   | 628.3  | 1254.58 | 1254.61 | -0.03      | 0       | 70      | 7.76E-06      | K.FDGLGMAYPR.I         | Oxidation (M)                          |                    | 20.77 |  |
|             |          |       |                   |       |     |          |             | 236     | 253   | 902.39 | 1802.78 | 1802.8  | -0.02      | 0       | 63      | 3.00E-05      | R.DPDAQPGGELMLGGTDSK.Y | Oxidation (M)                          |                    | 19.64 |  |
|             |          |       |                   |       |     |          |             | 349     | 357   | 533.27 | 1064.52 | 1064.54 | -0.02      | 0       | 58      | 0.0001173     | K.LSPEDYTLK.V          |                                        | 19.68              |       |  |
|             |          |       |                   |       |     |          |             | 393     | 399   | 482.22 | 962.43  | 962.45  | -0.02      | 0       | 33      | 0.0401256     | R.YYTVFDR.D            |                                        | 20.21              |       |  |
| P27348      | 12%      | 164   | 3                 | 28032 | 4.7 | P27348   | 1433T_HUMAN | 404     | 411   | 410.71 | 819.4   | 819.42  | -0.02      | 0       | 44      | 0.0032244     | R.VGFAEAAR.L           |                                        | 14.34              |       |  |
|             |          |       |                   |       |     |          |             | 28      | 41    | 766.85 | 1531.69 | 1531.71 | -0.02      | 0       | 75      | 2.22E-06      | K.AVTEQGAELSNEER.N     |                                        | 14.03              |       |  |
|             |          |       |                   |       |     |          |             | 42      | 49    | 454.26 | 906.5   | 906.52  | -0.02      | 0       | 45      | 0.0023551     | R.NLLSVAYK.N           |                                        | 20.08              |       |  |
|             |          |       |                   |       |     |          |             | 61      | 68    | 452.25 | 902.49  | 902.51  | -0.02      | 0       | 44      | 0.0035329     | R.VISSIEQK.T           |                                        | 13.34              |       |  |
| P30040      | 8%       | 133   | 2                 | 29032 | 6.8 | P30040   | ERP29_HUMAN | 183     | 192   | 538.26 | 1074.51 | 1074.53 | -0.02      | 0       | 95      | 2.85E-08      | K.QGQDNLSVKE.E         |                                        | 13.04              |       |  |
|             |          |       |                   |       |     |          |             | 244     | 253   | 567.83 | 1133.64 | 1133.64 | 0          | 0       | 38      | 0.010575      | K.SLNILTAFAQK.K        |                                        | 21.82              |       |  |
|             |          |       |                   |       |     |          |             | 183     | 192   | 538.26 | 1074.51 | 1074.53 | -0.02      | 0       | 95      | 2.85E-08      | K.QGQDNLSVKE.E         |                                        | 13.04              |       |  |
| P07686      | 4%       | 117   | 2                 | 63527 | 6.3 | P07686   | HEXB_HUMAN  | 466     | 476   | 595.8  | 1189.59 | 1189.6  | -0.01      | 0       | 60      | 7.13E-05      | K.VELDFGGTQK.Q         |                                        | 19.99              |       |  |
|             |          |       |                   |       |     |          |             | 391     | 400   | 550.33 | 1098.64 | 1098.66 | -0.02      | 0       | 57      | 0.0001603     | K.VLDIIATINK.G         |                                        | 21.21              |       |  |
| P04792      | 26%      | 425   | 5 (6)             | 22826 | 6   | P04792   | HSPB1_HUMAN | 80      | 89    | 529.77 | 1057.53 | 1057.54 | -0.01      | 0       | 36      | 0.0254353     | R.QLSSGVSEIR.H         |                                        | 20.26              |       |  |
|             |          |       |                   |       |     |          |             | 80      | 89    | 538.28 | 1074.55 | 1074.57 | -0.02      | 0       | 64      | 2.97E-05      | R.QLSSGVSEIR.H         |                                        | 15.15              |       |  |
|             |          |       |                   |       |     |          |             | 172     | 188   | 953.5  | 1904.99 | 1904.98 | 0          | 0       | 149     | 6.88E-14      | K.LATQSNITIPVTFESR.A   |                                        | 21.15              |       |  |
|             |          |       |                   |       |     |          |             | 189     | 198   | 471.26 | 940.51  | 940.5   | 0.01       | 0       | 64      | 2.66E-05      | R.AQLGGPEAAK.S         |                                        | 12.88              |       |  |
|             |          |       |                   |       |     |          |             | 189     | 205   | 548.6  | 1642.79 | 1642.82 | -0.03      | 1       | 76      | 1.75E-06      | R.AQLGGPEAAK.S         |                                        | 12.93              |       |  |
|             |          |       |                   |       |     |          |             | 28      | 37    | 582.31 | 1162.6  | 1162.61 | -0.01      | 0       | 73      | 3.75E-06      | R.LFDQAFGLPR.L         |                                        | 21.41              |       |  |
|             |          |       |                   |       |     |          |             | 80      | 89    | 529.77 | 1057.53 | 1057.54 | -0.01      | 0       | 36      | 0.0254353     | R.QLSSGVSEIR.H         | Gln->pyro-Glu (N-term Q)               |                    | 20.26 |  |

| accession # | coverage | score | distinct peptides | mass  | pl   | start AA | end AA      | m/z obs                               | M obs           | M calc    | delta | miss | pept score | exp val | peptide | modifications | retent time | Strongest gel slice | # gel slices found |   |  |  |  |  |  |  |  |  |  |  |  |  |  |
|-------------|----------|-------|-------------------|-------|------|----------|-------------|---------------------------------------|-----------------|-----------|-------|------|------------|---------|---------|---------------|-------------|---------------------|--------------------|---|--|--|--|--|--|--|--|--|--|--|--|--|--|
| P61020      | 17%      | 131   | 3                 | 23920 | 8.3  | P61020   | RAB5B_HUMAN | Ras-related protein Rab-5B            | OS=Homo sapiens | GN=RAB5B  | PE=1  | SV=1 |            |         |         |               |             | 20                  | 20                 | 1 |  |  |  |  |  |  |  |  |  |  |  |  |  |
|             |          |       |                   |       |      |          |             |                                       |                 |           |       |      |            |         |         |               |             |                     |                    |   |  |  |  |  |  |  |  |  |  |  |  |  |  |
|             |          |       |                   |       |      |          |             |                                       |                 |           |       |      |            |         |         |               |             |                     |                    |   |  |  |  |  |  |  |  |  |  |  |  |  |  |
|             |          |       |                   |       |      |          |             |                                       |                 |           |       |      |            |         |         |               |             |                     |                    |   |  |  |  |  |  |  |  |  |  |  |  |  |  |
| P60174      | 14%      | 140   | 3                 | 26938 | 6.5  | P60174   | TPIS_HUMAN  | Triosephosphate isomerase             | OS=Homo sapiens | GN=TP11   | PE=1  | SV=2 |            |         |         |               | 20          | 20                  | 1                  |   |  |  |  |  |  |  |  |  |  |  |  |  |  |
|             |          |       |                   |       |      |          |             |                                       |                 |           |       |      |            |         |         |               |             |                     |                    |   |  |  |  |  |  |  |  |  |  |  |  |  |  |
|             |          |       |                   |       |      |          |             |                                       |                 |           |       |      |            |         |         |               |             |                     |                    |   |  |  |  |  |  |  |  |  |  |  |  |  |  |
|             |          |       |                   |       |      |          |             |                                       |                 |           |       |      |            |         |         |               |             |                     |                    |   |  |  |  |  |  |  |  |  |  |  |  |  |  |
| P60900      | 13%      | 174   | 3                 | 27838 | 6.3  | P60900   | PSA6_HUMAN  | Proteasome subunit alpha type-6       | OS=Homo sapiens | GN=PSMA6  | PE=1  | SV=1 |            |         |         |               | 20          | 20                  | 1                  |   |  |  |  |  |  |  |  |  |  |  |  |  |  |
|             |          |       |                   |       |      |          |             |                                       |                 |           |       |      |            |         |         |               |             |                     |                    |   |  |  |  |  |  |  |  |  |  |  |  |  |  |
|             |          |       |                   |       |      |          |             |                                       |                 |           |       |      |            |         |         |               |             |                     |                    |   |  |  |  |  |  |  |  |  |  |  |  |  |  |
|             |          |       |                   |       |      |          |             |                                       |                 |           |       |      |            |         |         |               |             |                     |                    |   |  |  |  |  |  |  |  |  |  |  |  |  |  |
| P50914      | 11%      | 116   | 2                 | 23389 | 10.9 | P50914   | RL14_HUMAN  | 60S ribosomal protein L14             | OS=Homo sapiens | GN=RPL14  | PE=1  | SV=3 |            |         |         |               | 20          | 20                  | 1                  |   |  |  |  |  |  |  |  |  |  |  |  |  |  |
|             |          |       |                   |       |      |          |             |                                       |                 |           |       |      |            |         |         |               |             |                     |                    |   |  |  |  |  |  |  |  |  |  |  |  |  |  |
|             |          |       |                   |       |      |          |             |                                       |                 |           |       |      |            |         |         |               |             |                     |                    |   |  |  |  |  |  |  |  |  |  |  |  |  |  |
|             |          |       |                   |       |      |          |             |                                       |                 |           |       |      |            |         |         |               |             |                     |                    |   |  |  |  |  |  |  |  |  |  |  |  |  |  |
| P51572      | 9%       | 68    | 2                 | 28031 | 8.4  | P51572   | BAP31_HUMAN | B-cell receptor-associated protein 31 | OS=Homo sapiens | GN=BCAP31 | PE=1  | SV=3 |            |         |         |               | 20          | 20                  | 1                  |   |  |  |  |  |  |  |  |  |  |  |  |  |  |
|             |          |       |                   |       |      |          |             |                                       |                 |           |       |      |            |         |         |               |             |                     |                    |   |  |  |  |  |  |  |  |  |  |  |  |  |  |
|             |          |       |                   |       |      |          |             |                                       |                 |           |       |      |            |         |         |               |             |                     |                    |   |  |  |  |  |  |  |  |  |  |  |  |  |  |
|             |          |       |                   |       |      |          |             |                                       |                 |           |       |      |            |         |         |               |             |                     |                    |   |  |  |  |  |  |  |  |  |  |  |  |  |  |
| P30041      | 9%       | 117   | 2                 | 25133 | 6    | P30041   | PRDX6_HUMAN | Peroxiredoxin-6                       | OS=Homo sapiens | GN=PRDX6  | PE=1  | SV=3 |            |         |         |               | 20          | 20                  | 1                  |   |  |  |  |  |  |  |  |  |  |  |  |  |  |
|             |          |       |                   |       |      |          |             |                                       |                 |           |       |      |            |         |         |               |             |                     |                    |   |  |  |  |  |  |  |  |  |  |  |  |  |  |
|             |          |       |                   |       |      |          |             |                                       |                 |           |       |      |            |         |         |               |             |                     |                    |   |  |  |  |  |  |  |  |  |  |  |  |  |  |
|             |          |       |                   |       |      |          |             |                                       |                 |           |       |      |            |         |         |               |             |                     |                    |   |  |  |  |  |  |  |  |  |  |  |  |  |  |
| Q9BSR8      | 7%       | 79    | 2                 | 27122 | 4.5  | Q9BSR8   | YIPF4_HUMAN | Protein YIPF4                         | OS=Homo sapiens | GN=YIPF4  | PE=2  | SV=1 |            |         |         |               | 20          | 20                  | 1                  |   |  |  |  |  |  |  |  |  |  |  |  |  |  |
|             |          |       |                   |       |      |          |             |                                       |                 |           |       |      |            |         |         |               |             |                     |                    |   |  |  |  |  |  |  |  |  |  |  |  |  |  |
|             |          |       |                   |       |      |          |             |                                       |                 |           |       |      |            |         |         |               |             |                     |                    |   |  |  |  |  |  |  |  |  |  |  |  |  |  |
|             |          |       |                   |       |      |          |             |                                       |                 |           |       |      |            |         |         |               |             |                     |                    |   |  |  |  |  |  |  |  |  |  |  |  |  |  |
| P20340      | 28%      | 374   | 6                 | 23692 | 5.4  | P20340   | RAB6A_HUMAN | Ras-related protein Rab-6A            | OS=Homo sapiens | GN=RAB6A  | PE=1  | SV=3 |            |         |         |               | 21          | 21                  | 2                  |   |  |  |  |  |  |  |  |  |  |  |  |  |  |
|             |          |       |                   |       |      |          |             |                                       |                 |           |       |      |            |         |         |               |             |                     |                    |   |  |  |  |  |  |  |  |  |  |  |  |  |  |
|             |          |       |                   |       |      |          |             |                                       |                 |           |       |      |            |         |         |               |             |                     |                    |   |  |  |  |  |  |  |  |  |  |  |  |  |  |
|             |          |       |                   |       |      |          |             |                                       |                 |           |       |      |            |         |         |               |             |                     |                    |   |  |  |  |  |  |  |  |  |  |  |  |  |  |
|             |          |       |                   |       |      |          |             |                                       |                 |           |       |      |            |         |         |               |             |                     |                    |   |  |  |  |  |  |  |  |  |  |  |  |  |  |
|             |          |       |                   |       |      |          |             |                                       |                 |           |       |      |            |         |         |               |             |                     |                    |   |  |  |  |  |  |  |  |  |  |  |  |  |  |
|             |          |       |                   |       |      |          |             |                                       |                 |           |       |      |            |         |         |               |             |                     |                    |   |  |  |  |  |  |  |  |  |  |  |  |  |  |
|             |          |       |                   |       |      |          |             |                                       |                 |           |       |      |            |         |         |               |             |                     |                    |   |  |  |  |  |  |  |  |  |  |  |  |  |  |
| Q92520      | 17%      | 214   | 4                 | 24950 | 8.5  | Q92520   | FAM3C_HUMAN | Protein FAM3C                         | OS=Homo sapiens | GN=FAM3C  | PE=1  | SV=1 |            |         |         |               | 21          | 21                  | 2                  |   |  |  |  |  |  |  |  |  |  |  |  |  |  |
|             |          |       |                   |       |      |          |             |                                       |                 |           |       |      |            |         |         |               |             |                     |                    |   |  |  |  |  |  |  |  |  |  |  |  |  |  |
|             |          |       |                   |       |      |          |             |                                       |                 |           |       |      |            |         |         |               |             |                     |                    |   |  |  |  |  |  |  |  |  |  |  |  |  |  |
|             |          |       |                   |       |      |          |             |                                       |                 |           |       |      |            |         |         |               |             |                     |                    |   |  |  |  |  |  |  |  |  |  |  |  |  |  |
|             |          |       |                   |       |      |          |             |                                       |                 |           |       |      |            |         |         |               |             |                     |                    |   |  |  |  |  |  |  |  |  |  |  |  |  |  |
|             |          |       |                   |       |      |          |             |                                       |                 |           |       |      |            |         |         |               |             |                     |                    |   |  |  |  |  |  |  |  |  |  |  |  |  |  |
| P51148      | 16%      | 170   | 3                 | 23696 | 8.6  | P51148   | RAB5C_HUMAN | Ras-related protein Rab-5C            | OS=Homo sapiens | GN=RAB5C  | PE=1  | SV=2 |            |         |         |               | 21          | 21                  | 3                  |   |  |  |  |  |  |  |  |  |  |  |  |  |  |
|             |          |       |                   |       |      |          |             |                                       |                 |           |       |      |            |         |         |               |             |                     |                    |   |  |  |  |  |  |  |  |  |  |  |  |  |  |
|             |          |       |                   |       |      |          |             |                                       |                 |           |       |      |            |         |         |               |             |                     |                    |   |  |  |  |  |  |  |  |  |  |  |  |  |  |
|             |          |       |                   |       |      |          |             |                                       |                 |           |       |      |            |         |         |               |             |                     |                    |   |  |  |  |  |  |  |  |  |  |  |  |  |  |
| O75396      | 13%      | 152   | 3                 | 24896 | 8.7  | O75396   | SC22B_HUMAN | Vesicle-trafficking protein SEC22b    | OS=Homo sapiens | GN=SEC22B | PE=1  | SV=3 |            |         |         |               | 21          | 21                  | 1                  |   |  |  |  |  |  |  |  |  |  |  |  |  |  |
|             |          |       |                   |       |      |          |             |                                       |                 |           |       |      |            |         |         |               |             |                     |                    |   |  |  |  |  |  |  |  |  |  |  |  |  |  |
|             |          |       |                   |       |      |          |             |                                       |                 |           |       |      |            |         |         |               |             |                     |                    |   |  |  |  |  |  |  |  |  |  |  |  |  |  |
|             |          |       |                   |       |      |          |             |                                       |                 |           |       |      |            |         |         |               |             |                     |                    |   |  |  |  |  |  |  |  |  |  |  |  |  |  |
| P20339      | 11%      | 87    | 2                 | 23872 | 8.3  | P20339   | RAB5A_HUMAN | Ras-related protein Rab-5A            | OS=Homo sapiens | GN=RAB5A  | PE=1  | SV=2 |            |         |         |               | 21          | 21                  | 1                  |   |  |  |  |  |  |  |  |  |  |  |  |  |  |
|             |          |       |                   |       |      |          |             |                                       |                 |           |       |      |            |         |         |               |             |                     |                    |   |  |  |  |  |  |  |  |  |  |  |  |  |  |
|             |          |       |                   |       |      |          |             |                                       |                 |           |       |      |            |         |         |               |             |                     |                    |   |  |  |  |  |  |  |  |  |  |  |  |  |  |
| O43760      | 9%       | 104   | 2                 | 25079 | 4.8  | O43760   | SNG2_HUMAN  | Synaptogyrin-2                        | OS=Homo sapiens | GN=SYNGR2 | PE=1  | SV=1 |            |         |         |               | 21          | 21                  | 1                  |   |  |  |  |  |  |  |  |  |  |  |  |  |  |
|             |          |       |                   |       |      |          |             |                                       |                 |           |       |      |            |         |         |               |             |                     |                    |   |  |  |  |  |  |  |  |  |  |  |  |  |  |



| accession # | coverage | score   | distinct peptides | mass  | pl   | start AA | end AA     | m/z obs                    | M obs                              | M calc  | delta | miss | pept score | exp val   | peptide           | modifications | retent time | Strongest gel slice | # gel slices found |  |
|-------------|----------|---------|-------------------|-------|------|----------|------------|----------------------------|------------------------------------|---------|-------|------|------------|-----------|-------------------|---------------|-------------|---------------------|--------------------|--|
| P60660      | 25%      | 156     | 3                 | 17090 | 4.6  | P60660   | MYL6_HUMAN | Myosin light polypeptide 6 | OS=Homo sapiens GN=MYL6 PE=1 SV=2  |         |       |      |            |           |                   |               |             |                     |                    |  |
|             |          |         |                   |       |      |          | 31 38      | 460.76                     | 919.5                              | 919.51  | -0.01 | 0    | 39         | 0.010484  | K.LIGEYGLR.N      |               | 20.26       |                     |                    |  |
|             |          |         |                   |       |      |          | 84 91      | 415.72                     | 829.43                             | 829.45  | -0.02 | 0    | 35         | 0.0312409 | R.IGVLDEGK.M      |               | 16.99       |                     |                    |  |
|             |          |         |                   |       |      |          | 14 21      | 513.24                     | 1024.46                            | 1024.5  | -0.04 | 0    | 53         | 0.0003171 | K.EAFQLFDR.T      |               | 21.56       | 26                  | 1                  |  |
|             |          |         |                   |       |      |          | 38 50      | 677.87                     | 1353.72                            | 1353.73 | -0.01 | 0    | 68         | 1.16E-05  | R.ALGQNPTNAEVLK.V |               | 18.98       |                     |                    |  |
| 95 110      | 580.29   | 1737.84 | 1737.84           | 0     | 1    | 35       | 0.021048   | R.VFDKEGNGTVMGAEIR.H       | Oxidation (M)                      | 16.24   |       |      |            |           |                   |               |             |                     |                    |  |
| P39019      | 19%      | 119     | 3                 | 16051 | 10.3 | P39019   | RS19_HUMAN | 40S ribosomal protein S19  | OS=Homo sapiens GN=RPS19 PE=1 SV=2 |         |       |      |            |           |                   |               |             |                     |                    |  |
|             |          |         |                   |       |      |          | 8 16       | 567.8                      | 1133.59                            | 1133.55 | 0.04  | 0    | 36         | 0.0201638 | K.DVNQQEFVR.A     |               | 17.68       | 26                  | 1                  |  |
|             |          |         |                   |       |      |          | 103 111    | 485.79                     | 969.57                             | 969.59  | -0.01 | 0    | 39         | 0.0084805 | R.VLQALEGLK.M     |               | 20.68       |                     |                    |  |
|             |          |         |                   |       |      |          | 134 143    | 471.78                     | 941.54                             | 941.53  | 0.01  | 0    | 45         | 0.0021064 | R.IAGQVAAANK.K    |               | 12.6        |                     |                    |  |
|             |          |         |                   |       |      |          |            |                            |                                    |         |       |      |            |           |                   |               |             |                     |                    |  |
| P62269      | 12%      | 93      | 2                 | 17708 | 11   | P62269   | RS18_HUMAN | 40S ribosomal protein S18  | OS=Homo sapiens GN=RPS18 PE=1 SV=3 |         |       |      |            |           |                   |               |             |                     |                    |  |
|             |          |         |                   |       |      |          | 15 23      | 501.26                     | 1000.51                            | 1000.53 | -0.02 | 0    | 42         | 0.0052026 | R.VLNTNIDGR.R     |               | 14.99       | 26                  | 1                  |  |
|             |          |         |                   |       |      |          | 67 75      | 544.3                      | 1086.58                            | 1086.59 | 0     | 0    | 51         | 0.0007912 | R.VITIMQNPR.Q     | Oxidation (M) | 14.73       |                     |                    |  |
|             |          |         |                   |       |      |          |            |                            |                                    |         |       |      |            |           |                   |               |             |                     |                    |  |

**\*Footnotes to Supplemental Table 8:**

Data sets were searched with the Mascot search engine (see Perkins et al. (1999) *Electrophoresis* **20**, 3551-3567).

Detailed are the SwissProt accession number, the number of distinct proteolytic peptides (in some cases the number of observed redundant peptide sequences is indicated in parentheses), and the sequence coverage of the protein (%).

Listed is the Mascot protein score as well as the score and expectation value for the individual peptides.

Additional columns indicate the position of the protein in the 1D-SDS PAGE gel (strongest gel slice in which the protein was identified, and the total # of adjacent gel slices in which the protein was found).

Proteins identified by single-peptide assignments for this experiment are not listed in this Table but in Supplemental Table 12.

Supplemental Table 9. Proteins identified by HPLC-MS/MS in 3-hour latex bead human THP-1 phagosome preparation.\*

ESI-MS/MS raw data obtained on a QSTAR Pulsar i instrument and Mascot search results for trypsin digestion of proteins separated on a 1D-SDS PAGE gel. For summary see Supplemental Table 1.

| accession #                    | coverage | score | distinct peptides | mass   | pl  | start AA | end AA                                                                | m/z obs         | M obs      | M calc | delta | miss                                        | pept score | exp val | peptide | modifications | retent time | Strongest gel slice | # gel slices found |  |  |  |  |  |  |  |  |
|--------------------------------|----------|-------|-------------------|--------|-----|----------|-----------------------------------------------------------------------|-----------------|------------|--------|-------|---------------------------------------------|------------|---------|---------|---------------|-------------|---------------------|--------------------|--|--|--|--|--|--|--|--|
| P15144                         | 10%      | 466   | 9                 | 109870 | 5.3 | P15144   | [AMPN_HUMAN Aminopeptidase N                                          | OS=Homo sapiens | GN=ANPEP   | PE=1   | SV=4  | 0.0208314 R.VTLRPLYLPNDR.G                  |            |         |         |               |             |                     |                    |  |  |  |  |  |  |  |  |
|                                |          |       |                   |        |     |          |                                                                       |                 |            |        |       | 87 98 482.27 1443.78 1443.78 -0.01 0 35     |            |         |         |               |             |                     |                    |  |  |  |  |  |  |  |  |
|                                |          |       |                   |        |     |          |                                                                       |                 |            |        |       | 196 204 550.71 1099.41 1099.46 -0.05 0 33   |            |         |         |               |             |                     |                    |  |  |  |  |  |  |  |  |
|                                |          |       |                   |        |     |          |                                                                       |                 |            |        |       | 205 218 502.57 1504.7 1504.77 -0.07 1 40    |            |         |         |               |             |                     |                    |  |  |  |  |  |  |  |  |
|                                |          |       |                   |        |     |          |                                                                       |                 |            |        |       | 206 218 689.36 1376.71 1376.67 0.04 0 70    |            |         |         |               |             |                     |                    |  |  |  |  |  |  |  |  |
|                                |          |       |                   |        |     |          |                                                                       |                 |            |        |       | 242 252 609.81 1217.61 1217.63 -0.03 0 56   |            |         |         |               |             |                     |                    |  |  |  |  |  |  |  |  |
|                                |          |       |                   |        |     |          |                                                                       |                 |            |        |       | 293 301 479.27 956.52 956.54 -0.02 0 54     |            |         |         |               |             |                     |                    |  |  |  |  |  |  |  |  |
|                                |          |       |                   |        |     |          |                                                                       |                 |            |        |       | 364 379 862.9 1723.79 1723.83 -0.04 0 58    |            |         |         |               |             |                     |                    |  |  |  |  |  |  |  |  |
|                                |          |       |                   |        |     |          |                                                                       |                 |            |        |       | 433 442 627.3 1252.58 1252.61 -0.03 0 63    |            |         |         |               |             |                     |                    |  |  |  |  |  |  |  |  |
|                                |          |       |                   |        |     |          |                                                                       |                 |            |        |       | 924 935 635.27 1268.53 1268.53 0 0 60       |            |         |         |               |             |                     |                    |  |  |  |  |  |  |  |  |
|                                |          |       |                   |        |     |          |                                                                       |                 |            |        |       | 7.76E-05 K.DNEETGFGSGTR.A                   |            |         |         |               |             |                     |                    |  |  |  |  |  |  |  |  |
| P62988                         | 38%      | 81    | 2                 | 8560   | 6.6 | P62988   | [UBIQ_HUMAN Ubiquitin                                                 | OS=Homo sapiens | GN=RPS27A  | PE=1   | SV=1  | 0.0046967 K.TITLEVEPSDTIENK.V.A             |            |         |         |               |             |                     |                    |  |  |  |  |  |  |  |  |
|                                |          |       |                   |        |     |          |                                                                       |                 |            |        |       | 12 27 894.46 1786.9 1786.92 -0.02 0 41      |            |         |         |               |             |                     |                    |  |  |  |  |  |  |  |  |
|                                |          |       |                   |        |     |          |                                                                       |                 |            |        |       | 30 42 508.59 1522.73 1522.77 -0.04 1 40     |            |         |         |               |             |                     |                    |  |  |  |  |  |  |  |  |
|                                |          |       |                   |        |     |          |                                                                       |                 |            |        |       | 0.0063358 K.IQKKEIIPPQQQL                   |            |         |         |               |             |                     |                    |  |  |  |  |  |  |  |  |
| P11279                         | 9%       | 160   | 4                 | 45367  | 9   | P11279   | [LAMP1_HUMAN Lysosome-associated membrane glycoprotein 1              | OS=Homo sapiens | GN=LAMP1   | PE=1   | SV=3  | 0.0096108 K.TVESTDIR.A                      |            |         |         |               |             |                     |                    |  |  |  |  |  |  |  |  |
|                                |          |       |                   |        |     |          |                                                                       |                 |            |        |       | 327 337 576.28 1150.55 1150.6 -0.04 0 45    |            |         |         |               |             |                     |                    |  |  |  |  |  |  |  |  |
|                                |          |       |                   |        |     |          |                                                                       |                 |            |        |       | 349 356 463.26 924.5 924.51 -0.01 0 46      |            |         |         |               |             |                     |                    |  |  |  |  |  |  |  |  |
|                                |          |       |                   |        |     |          |                                                                       |                 |            |        |       | 410 417 438.7 875.39 875.41 -0.02 0 33      |            |         |         |               |             |                     |                    |  |  |  |  |  |  |  |  |
|                                |          |       |                   |        |     |          |                                                                       |                 |            |        |       | 0.0406702 R.SHAGYQTI.-                      |            |         |         |               |             |                     |                    |  |  |  |  |  |  |  |  |
| Q92542                         | 6%       | 204   | 4                 | 79103  | 5.7 | Q92542   | [NICA_HUMAN Nicastrin                                                 | OS=Homo sapiens | GN=NCSTN   | PE=1   | SV=2  | 0.0020913 K.APDVTTLLPR.N                    |            |         |         |               |             |                     |                    |  |  |  |  |  |  |  |  |
|                                |          |       |                   |        |     |          |                                                                       |                 |            |        |       | 404 414 520.3 1038.59 1038.62 -0.03 0 39    |            |         |         |               |             |                     |                    |  |  |  |  |  |  |  |  |
|                                |          |       |                   |        |     |          |                                                                       |                 |            |        |       | 486 496 543.3 1084.59 1084.62 -0.04 0 70    |            |         |         |               |             |                     |                    |  |  |  |  |  |  |  |  |
|                                |          |       |                   |        |     |          |                                                                       |                 |            |        |       | 694 702 501.3 1000.58 1000.57 0.01 0 50     |            |         |         |               |             |                     |                    |  |  |  |  |  |  |  |  |
|                                |          |       |                   |        |     |          |                                                                       |                 |            |        |       | 0.0008886 K.ADLVFIAPR.E                     |            |         |         |               |             |                     |                    |  |  |  |  |  |  |  |  |
| P13473                         | 4%       | 122   | 2                 | 45503  | 5.3 | P13473   | [LAMP2_HUMAN Lysosome-associated membrane glycoprotein 2              | OS=Homo sapiens | GN=LAMP2   | PE=1   | SV=2  | 0.0002571 R.IPLNDLFR.C                      |            |         |         |               |             |                     |                    |  |  |  |  |  |  |  |  |
|                                |          |       |                   |        |     |          |                                                                       |                 |            |        |       | 145 152 494.27 986.52 986.55 -0.04 0 55     |            |         |         |               |             |                     |                    |  |  |  |  |  |  |  |  |
|                                |          |       |                   |        |     |          |                                                                       |                 |            |        |       | 153 161 526.25 1050.48 1050.5 -0.02 0 67    |            |         |         |               |             |                     |                    |  |  |  |  |  |  |  |  |
| 1.29E-05 R.CNSLSTLEK.N         |          |       |                   |        |     |          |                                                                       |                 |            |        |       |                                             |            |         |         |               |             |                     |                    |  |  |  |  |  |  |  |  |
| P42704                         | 3%       | 172   | 4                 | 159003 | 5.8 | P42704   | [LPPRC_HUMAN Leucine-rich PPR motif-containing protein, mitochondrial | OS=Homo sapiens | GN=LRPPRC  | PE=1   | SV=3  | 0.0362134 K.IQEENVIPR.E                     |            |         |         |               |             |                     |                    |  |  |  |  |  |  |  |  |
|                                |          |       |                   |        |     |          |                                                                       |                 |            |        |       | 1099 1109 583.26 1164.5 1164.55 -0.06 0 48  |            |         |         |               |             |                     |                    |  |  |  |  |  |  |  |  |
|                                |          |       |                   |        |     |          |                                                                       |                 |            |        |       | 1129 1139 636.79 1271.57 1271.65 -0.07 0 57 |            |         |         |               |             |                     |                    |  |  |  |  |  |  |  |  |
|                                |          |       |                   |        |     |          |                                                                       |                 |            |        |       | 1164 1176 696.86 1391.7 1391.7 0.01 0 37    |            |         |         |               |             |                     |                    |  |  |  |  |  |  |  |  |
|                                |          |       |                   |        |     |          |                                                                       |                 |            |        |       | 0.0128159 K.MNLNGLEDSIGLSK.M                |            |         |         |               |             |                     |                    |  |  |  |  |  |  |  |  |
| P05556                         | 3%       | 78    | 2                 | 91714  | 5.3 | P05556   | [ITB1_HUMAN Integrin beta-1                                           | OS=Homo sapiens | GN=ITGB1   | PE=1   | SV=1  | 0.0251616 R.IGFSGFVEK.T                     |            |         |         |               |             |                     |                    |  |  |  |  |  |  |  |  |
|                                |          |       |                   |        |     |          |                                                                       |                 |            |        |       | 182 190 492.25 982.49 982.51 -0.02 0 34     |            |         |         |               |             |                     |                    |  |  |  |  |  |  |  |  |
|                                |          |       |                   |        |     |          |                                                                       |                 |            |        |       | 191 202 662.82 1323.63 1323.67 -0.05 0 44   |            |         |         |               |             |                     |                    |  |  |  |  |  |  |  |  |
| 0.0029705 K.TVMPIYISTPAK.L     |          |       |                   |        |     |          |                                                                       |                 |            |        |       |                                             |            |         |         |               |             |                     |                    |  |  |  |  |  |  |  |  |
| P14625                         | 10%      | 380   | 8                 | 92696  | 4.8 | P14625   | [ENPL_HUMAN Endoplasmic membrane protein                              | OS=Homo sapiens | GN=HSP90B1 | PE=1   | SV=1  | 0.0170786 K.FAFQAEVNR.M                     |            |         |         |               |             |                     |                    |  |  |  |  |  |  |  |  |
|                                |          |       |                   |        |     |          |                                                                       |                 |            |        |       | 88 95 482.28 962.54 962.58 -0.04 0 33       |            |         |         |               |             |                     |                    |  |  |  |  |  |  |  |  |
|                                |          |       |                   |        |     |          |                                                                       |                 |            |        |       | 385 395 594.33 1186.65 1186.67 -0.02 0 38   |            |         |         |               |             |                     |                    |  |  |  |  |  |  |  |  |
|                                |          |       |                   |        |     |          |                                                                       |                 |            |        |       | 435 448 743.37 1484.73 1484.75 -0.01 0 86   |            |         |         |               |             |                     |                    |  |  |  |  |  |  |  |  |
|                                |          |       |                   |        |     |          |                                                                       |                 |            |        |       | 494 503 570.27 1138.52 1138.57 -0.05 0 36   |            |         |         |               |             |                     |                    |  |  |  |  |  |  |  |  |
|                                |          |       |                   |        |     |          |                                                                       |                 |            |        |       | 548 557 575.9 1149.79 1149.53 0.26 0 64     |            |         |         |               |             |                     |                    |  |  |  |  |  |  |  |  |
|                                |          |       |                   |        |     |          |                                                                       |                 |            |        |       | 725 733 497.26 992.5 992.52 -0.02 0 56      |            |         |         |               |             |                     |                    |  |  |  |  |  |  |  |  |
|                                |          |       |                   |        |     |          |                                                                       |                 |            |        |       | 745 754 543.27 1084.53 1084.58 -0.04 0 34   |            |         |         |               |             |                     |                    |  |  |  |  |  |  |  |  |
|                                |          |       |                   |        |     |          |                                                                       |                 |            |        |       | 0.0285218 R.LSLNIDPDAK.V                    |            |         |         |               |             |                     |                    |  |  |  |  |  |  |  |  |
|                                |          |       |                   |        |     |          |                                                                       |                 |            |        |       |                                             |            |         |         |               |             |                     |                    |  |  |  |  |  |  |  |  |
| Q14108                         | 27%      | 597   | 11                | 54712  | 5   | Q14108   | [SCRB2_HUMAN Lysosome membrane protein 2                              | OS=Homo sapiens | GN=SCARB2  | PE=1   | SV=2  | 0.0003072 R.GETPRVEVGPYTYR.E                |            |         |         |               |             |                     |                    |  |  |  |  |  |  |  |  |
|                                |          |       |                   |        |     |          |                                                                       |                 |            |        |       | 83 92 606.78 1211.55 1211.58 -0.03 0 62     |            |         |         |               |             |                     |                    |  |  |  |  |  |  |  |  |
|                                |          |       |                   |        |     |          |                                                                       |                 |            |        |       | 116 121 392.69 783.37 783.39 -0.02 0 33     |            |         |         |               |             |                     |                    |  |  |  |  |  |  |  |  |
|                                |          |       |                   |        |     |          |                                                                       |                 |            |        |       | 116 129 537.7 1610.08 1609.77 0.3 1 40      |            |         |         |               |             |                     |                    |  |  |  |  |  |  |  |  |
|                                |          |       |                   |        |     |          |                                                                       |                 |            |        |       | 154 161 481.75 961.48 961.52 -0.03 0 46     |            |         |         |               |             |                     |                    |  |  |  |  |  |  |  |  |
|                                |          |       |                   |        |     |          |                                                                       |                 |            |        |       | 263 275 823.86 1645.71 1645.74 -0.04 0 45   |            |         |         |               |             |                     |                    |  |  |  |  |  |  |  |  |
|                                |          |       |                   |        |     |          |                                                                       |                 |            |        |       | 331 348 703.65 2107.93 2107.98 -0.05 0 61   |            |         |         |               |             |                     |                    |  |  |  |  |  |  |  |  |
|                                |          |       |                   |        |     |          |                                                                       |                 |            |        |       | 349 378 845.92 3379.63 3379.68 -0.04 0 46   |            |         |         |               |             |                     |                    |  |  |  |  |  |  |  |  |
|                                |          |       |                   |        |     |          |                                                                       |                 |            |        |       | 391 402 704.5 1406.99 1406.7 0.28 1 87      |            |         |         |               |             |                     |                    |  |  |  |  |  |  |  |  |
|                                |          |       |                   |        |     |          |                                                                       |                 |            |        |       | 392 402 640.3 1278.58 1278.61 -0.02 0 56    |            |         |         |               |             |                     |                    |  |  |  |  |  |  |  |  |
|                                |          |       |                   |        |     |          |                                                                       |                 |            |        |       | 460 477 640.29 1917.85 1917.89 -0.03 1 69   |            |         |         |               |             |                     |                    |  |  |  |  |  |  |  |  |
| 7.98E-06 K.GQGSMDGTDADERAPLR.T |          |       |                   |        |     |          |                                                                       |                 |            |        |       |                                             |            |         |         |               |             |                     |                    |  |  |  |  |  |  |  |  |



| accession # | coverage | score | distinct peptides | mass  | pl  | start AA | end AA      | m/z obs                                                                  | M obs | M calc | delta   | miss    | pept score | exp val | peptide | modifications | retent time          | Strongest gel slice     | # gel slices found |       |   |   |
|-------------|----------|-------|-------------------|-------|-----|----------|-------------|--------------------------------------------------------------------------|-------|--------|---------|---------|------------|---------|---------|---------------|----------------------|-------------------------|--------------------|-------|---|---|
| P08238      | 5%       | 189   | 3                 | 83554 | 5   | P08238   | HS90B_HUMAN | Heat shock protein 90-beta                                               | 107   | 621.83 | 1241.65 | 1241.7  | -0.05      | 0       | 58      | 0.0001175     | K.ADLINNLGTLAK.S     |                         | 21.09              | 5     | 1 |   |
|             |          |       |                   |       |     |          |             | 379                                                                      | 392   | 757.37 | 1512.73 | 1512.78 | -0.04      | 0       | 81      | 5.34E-07      | R.GVVDSEDLPLNISR.E   |                         | 21.05              |       |   |   |
|             |          |       |                   |       |     |          |             | 492                                                                      | 502   | 625.28 | 1248.54 | 1248.61 | -0.07      | 0       | 50      | 0.000794      | K.EQVANSAFVER.V      |                         | 15.93              |       |   |   |
|             |          |       |                   |       |     |          |             |                                                                          |       |        |         |         |            |         |         |               |                      |                         |                    |       |   |   |
| P05107      | 5%       | 139   | 3                 | 87976 | 6.7 | P05107   | ITB2_HUMAN  | Integrin beta-2                                                          | 156   | 165    | 545.27  | 1088.53 | 1088.55    | -0.01   | 0       | 41            | 0.0070227            | R.ALNEITESGR.I          |                    | 14.81 | 5 | 3 |
|             |          |       |                   |       |     |          |             | 275                                                                      | 285   | 563.8  | 1125.58 | 1125.61 | -0.03      | 0       | 54      | 0.0002951     | K.LGAILTPNDGR.C      |                         | 19.74              |       |   |   |
|             |          |       |                   |       |     |          |             | 311                                                                      | 325   | 836.93 | 1671.84 | 1671.89 | -0.05      | 0       | 45      | 0.0022726     | K.LAENNIQPIFAVTSR.M  |                         | 21.31              |       |   |   |
|             |          |       |                   |       |     |          |             |                                                                          |       |        |         |         |            |         |         |               |                      |                         |                    |       |   |   |
| P11021      | 8%       | 269   | 5                 | 72402 | 5.1 | P11021   | GRP78_HUMAN | Glucose-regulated protein 78 kDa                                         | 50    | 60     | 614.85  | 1227.69 | 1227.62    | 0.07    | 0       | 62            | 5.11E-05             | R.VEIIANDQGNR.I         |                    | 15.73 | 6 | 3 |
|             |          |       |                   |       |     |          |             | 82                                                                       | 96    | 839.42 | 1676.83 | 1676.8  | 0.03       | 0       | 83      | 3.02E-07      | K.NQLTSNPENTVFDK.R   |                         | 20.57              |       |   |   |
|             |          |       |                   |       |     |          |             | 186                                                                      | 197   | 617.32 | 1232.63 | 1232.62 | 0.01       | 0       | 37      | 0.0157666     | K.DAGTIAGLNVLR.I     | Oxidation (M)           | 20.48              |       |   |   |
|             |          |       |                   |       |     |          |             | 345                                                                      | 352   | 459.75 | 917.48  | 917.47  | 0.01       | 0       | 37      | 0.0162374     | K.VLESDLK.K          |                         | 15.53              |       |   |   |
|             |          |       |                   |       |     |          |             | 524                                                                      | 532   | 537.79 | 1073.56 | 1073.55 | 0.02       | 0       | 51      | 0.0006773     | K.IITITNDQNR.L       |                         | 14.01              |       |   |   |
| P15586      | 6%       | 134   | 3                 | 62840 | 8.6 | P15586   | GNS_HUMAN   | N-acetylglucosamine-6-sulfatase                                          | 410   | 421    | 676.33  | 1350.64 | 1350.64    | -0.01   | 0       | 45            | 0.0019781            | R.SDVLVEYQGEGR.N        |                    | 20.17 | 6 | 2 |
|             |          |       |                   |       |     |          |             | 494                                                                      | 502   | 493.29 | 984.57  | 984.55  | 0.02       | 0       | 34      | 0.0284326     | K.TIDPELLG.K         |                         | 20.7               |       |   |   |
|             |          |       |                   |       |     |          |             | 507                                                                      | 519   | 786.82 | 1571.63 | 1571.66 | -0.03      | 0       | 55      | 0.0002476     | R.LMMLQSCSGPTCR.T    | 2 Oxidation (M)         | 14.92              |       |   |   |
|             |          |       |                   |       |     |          |             |                                                                          |       |        |         |         |            |         |         |               |                      |                         |                    |       |   |   |
| P26038      | 6%       | 175   | 4                 | 67892 | 6.1 | P26038   | MOES_HUMAN  | Moesin                                                                   | 372   | 379    | 494.25  | 986.5   | 986.5      | -0.01   | 0       | 38            | 0.0143555            | R.ALELEQER.K            |                    | 17.57 | 6 | 1 |
|             |          |       |                   |       |     |          |             | 428                                                                      | 435   | 482.27 | 962.52  | 962.49  | 0.03       | 0       | 40      | 0.0079327     | R.ISQLEMAR.Q         | Oxidation (M)           | 13.92              |       |   |   |
|             |          |       |                   |       |     |          |             | 449                                                                      | 458   | 603.79 | 1205.56 | 1205.56 | 0          | 0       | 56      | 0.0001644     | K.AQMVEDELEK.T       | Oxidation (M)           | 14.3               |       |   |   |
|             |          |       |                   |       |     |          |             | 569                                                                      | 577   | 585.76 | 1169.51 | 1169.5  | 0.01       | 1       | 41      | 0.0057262     | K.QRIDEFESM.-        | Oxidation (M)           | 19.3               |       |   |   |
|             |          |       |                   |       |     |          |             |                                                                          |       |        |         |         |            |         |         |               |                      |                         |                    |       |   |   |
| P51659      | 4%       | 99    | 2                 | 80092 | 9   | P51659   | DHB4_HUMAN  | Peroxisomal multifunctional enzyme type 2                                | 11    | 23     | 585.31  | 1168.61 | 1168.69    | -0.08   | 0       | 33            | 0.0337237            | R.VLVLTGAGAGLGR.A       |                    | 20.43 | 6 | 1 |
|             |          |       |                   |       |     |          |             | 316                                                                      | 331   | 734.41 | 1466.8  | 1466.74 | 0.07       | 0       | 65      | 1.96E-05      | R.ATSTATSGFAGAIGQK.L |                         | 20.04              |       |   |   |
|             |          |       |                   |       |     |          |             |                                                                          |       |        |         |         |            |         |         |               |                      |                         |                    |       |   |   |
| P04843      | 8%       | 238   | 4                 | 68641 | 6   | P04843   | RPN1_HUMAN  | Dolichyl-diphosphooligosaccharide--protein glycosyltransferase subunit 1 | 66    | 80     | 830.42  | 1658.82 | 1658.89    | -0.07   | 0       | 67            | 1.36E-05             | R.ATSFLLAPELEAR.L       |                    | 24.23 | 7 | 1 |
|             |          |       |                   |       |     |          |             | 117                                                                      | 126   | 490.81 | 979.6   | 979.57  | 0.03       | 0       | 54      | 0.0002692     | K.LPVALDPGAK.I       |                         | 20.33              |       |   |   |
|             |          |       |                   |       |     |          |             | 269                                                                      | 278   | 530.28 | 1058.54 | 1058.54 | 0.01       | 0       | 54      | 0.0003436     | R.QPDSGSISSIR.S      |                         | 16.16              |       |   |   |
|             |          |       |                   |       |     |          |             | 525                                                                      | 536   | 651.45 | 1300.88 | 1300.74 | 0.15       | 0       | 63      | 3.25E-05      | K.ALTSEIALLQSR.L     |                         | 22.03              |       |   |   |
|             |          |       |                   |       |     |          |             |                                                                          |       |        |         |         |            |         |         |               |                      |                         |                    |       |   |   |
| P04062      | 7%       | 239   | 4                 | 60134 | 7.3 | P04062   | GLCM_HUMAN  | Glucosylceramidase                                                       | 160   | 170    | 649.82  | 1297.62 | 1297.58    | 0.04    | 0       | 82            | 4.41E-07             | R.VPMASCDFSIR.T         | Oxidation (M)      | 20.46 | 7 | 3 |
|             |          |       |                   |       |     |          |             | 317                                                                      | 324   | 510.27 | 1018.52 | 1018.51 | 0.01       | 0       | 45      | 0.0027316     | R.LLMLDDQR.L         | Oxidation (M)           | 20.11              |       |   |   |
|             |          |       |                   |       |     |          |             | 435                                                                      | 447   | 730.9  | 1459.78 | 1459.79 | -0.01      | 0       | 66      | 1.89E-05      | R.NFVDSPIVDITK.D     |                         | 23.11              |       |   |   |
|             |          |       |                   |       |     |          |             | 473                                                                      | 480   | 401.23 | 800.45  | 800.48  | -0.03      | 0       | 46      | 0.0026062     | R.VGLVASQK.N         |                         | 13.92              |       |   |   |
|             |          |       |                   |       |     |          |             |                                                                          |       |        |         |         |            |         |         |               |                      |                         |                    |       |   |   |
| P38606      | 7%       | 211   | 4                 | 68660 | 5.3 | P38606   | VATA_HUMAN  | Vacuolar ATP synthase catalytic subunit A                                | 121   | 129    | 451.76  | 901.51  | 901.5      | 0.01    | 0       | 34            | 0.0378398            | R.GVNVALSAR.D           |                    | 18.37 | 7 | 2 |
|             |          |       |                   |       |     |          |             | 257                                                                      | 265   | 481.78 | 961.55  | 961.54  | 0.01       | 0       | 53      | 0.0004744     | K.TVISQSLK.Y         |                         | 16.44              |       |   |   |
|             |          |       |                   |       |     |          |             | 281                                                                      | 289   | 525.75 | 1049.49 | 1049.48 | 0.01       | 0       | 43      | 0.0036192     | R.GNEMSEVLR.D        | Oxidation (M)           | 14.27              |       |   |   |
|             |          |       |                   |       |     |          |             | 309                                                                      | 323   | 766.4  | 1530.79 | 1530.78 | 0          | 0       | 81      | 5.30E-07      | R.TALVANTSNPVAAR.E   | Oxidation (M)           | 15.99              |       |   |   |
| P11142      | 5%       | 122   | 3                 | 71082 | 5.4 | P11142   | HSP7C_HUMAN | Heat shock cognate 71 kDa protein                                        | 26    | 36     | 614.81  | 1227.61 | 1227.62    | -0.01   | 0       | 37            | 0.017062             | K.VEIIANDQGNR.T         |                    | 16.08 | 7 | 1 |
|             |          |       |                   |       |     |          |             | 160                                                                      | 171   | 600.35 | 1198.68 | 1198.67 | 0.02       | 0       | 50      | 0.0008364     | K.DAGTIAGLNVLR.I     |                         | 22.24              |       |   |   |
|             |          |       |                   |       |     |          |             | 349                                                                      | 357   | 541.3  | 1080.58 | 1080.56 | 0.02       | 0       | 35      | 0.0191184     | K.LLQDFNGK.E         |                         | 22.42              |       |   |   |
|             |          |       |                   |       |     |          |             |                                                                          |       |        |         |         |            |         |         |               |                      |                         |                    |       |   |   |
| P13796      | 4%       | 74    | 2                 | 70815 | 5.2 | P13796   | PLSL_HUMAN  | Plastin-2                                                                | 348   | 357    | 568.31  | 1134.61 | 1134.6     | 0.01    | 0       | 32            | 0.0454976            | R.QFVTATDVRV.R          |                    | 20.38 | 7 | 1 |
|             |          |       |                   |       |     |          |             | 571                                                                      | 584   | 539.93 | 1616.78 | 1616.76 | 0.01       | 1       | 42      | 0.0040536     | K.TENLNDDKLNNAK.Y    |                         | 13.88              |       |   |   |
|             |          |       |                   |       |     |          |             |                                                                          |       |        |         |         |            |         |         |               |                      |                         |                    |       |   |   |
| P38646      | 4%       | 122   | 2                 | 73920 | 5.9 | P38646   | GRP75_HUMAN | Stress-70 protein, mitochondrial                                         | 207   | 218    | 621.85  | 1241.68 | 1241.67    | 0.01    | 0       | 51            | 0.0006123            | K.DAGQISGLNVLR.V        |                    | 21.64 | 7 | 1 |
|             |          |       |                   |       |     |          |             | 635                                                                      | 646   | 616.35 | 1230.69 | 1230.66 | 0.03       | 0       | 71      | 6.08E-06      | R.QAASSLQQASLK.L     |                         | 15.51              |       |   |   |
|             |          |       |                   |       |     |          |             |                                                                          |       |        |         |         |            |         |         |               |                      |                         |                    |       |   |   |
| P10809      | 24%      | 683   | 12                | 61187 | 5.7 | P10809   | CH60_HUMAN  | heat shock protein, mitochondrial                                        | 38    | 58     | 715.7   | 2144.07 | 2144.12    | -0.05   | 0       | 65            | 1.90E-05             | R.ALMLQVLDLADAVATMGPK.2 | Oxidation (M)      | 24.99 | 8 | 2 |



| accession #                                                                    | coverage | score | distinct peptides | mass  | pl  | start AA | end AA       | m/z obs                                                                                                         | M obs | M calc | delta   | miss    | pept score | exp val | peptide | modifications | retent time                  | Strongest gel slice | # gel slices found |    |    |  |  |
|--------------------------------------------------------------------------------|----------|-------|-------------------|-------|-----|----------|--------------|-----------------------------------------------------------------------------------------------------------------|-------|--------|---------|---------|------------|---------|---------|---------------|------------------------------|---------------------|--------------------|----|----|--|--|
| P34897                                                                         | 6%       | 152   | 3                 | 56414 | 8.8 | P34897   | GLYM_HUMAN   | 201                                                                                                             | 214   | 774.89 | 1547.77 | 1547.83 | -0.07      | 0       | 45      | 0.0022843     | K.TGLIDYDQGLALTAR.L          |                     | 22.19              | 10 | 1  |  |  |
|                                                                                |          |       |                   |       |     |          |              | 360                                                                                                             | 368   | 503.27 | 1004.52 | 1004.5  | 0.03       | 0       | 41      | 0.0061598     | R.AMADALLER.G                | Oxidation (M)       | 19.54              |    |    |  |  |
|                                                                                |          |       |                   |       |     |          |              | 426                                                                                                             | 434   | 443.25 | 884.49  | 884.51  | -0.02      | 0       | 36      | 0.02169       | R.LGAPALTSR.Q                |                     | 16.95              |    |    |  |  |
|                                                                                |          |       |                   |       |     |          |              | Serine hydroxymethyltransferase, mitochondrial OS=Homo sapiens GN=SHMT2 PE=1 SV=3                               |       |        |         |         |            |         |         |               |                              |                     |                    |    |    |  |  |
| O95766                                                                         | 5%       | 105   | 2                 | 56286 | 6.1 | O95766   | CCG028_HUMAN | 247                                                                                                             | 255   | 549.29 | 1096.56 | 1096.59 | -0.03      | 0       | 42      | 0.0043438     | K.YLTTSLFPR.H                |                     | 21.84              | 10 | 1  |  |  |
|                                                                                |          |       |                   |       |     |          |              | 282                                                                                                             | 295   | 757.88 | 1513.75 | 1513.78 | -0.03      | 0       | 34      | 0.0266633     | R.FLTGPLNLNDPDAK.C           |                     | 21.89              |    |    |  |  |
|                                                                                |          |       |                   |       |     |          |              | UPF0550 protein C7orf28 OS=Homo sapiens GN=C7orf28A PE=1 SV=1                                                   |       |        |         |         |            |         |         |               |                              |                     |                    |    |    |  |  |
|                                                                                |          |       |                   |       |     |          |              | Oxidation (M)                                                                                                   |       |        |         |         |            |         |         |               |                              |                     |                    |    |    |  |  |
| P09622                                                                         | 4%       | 117   | 2                 | 54686 | 7.6 | P09622   | DLDH_HUMAN   | 167                                                                                                             | 177   | 552.78 | 1103.55 | 1103.55 | 0.01       | 0       | 80      | 8.55E-07      | K.ADGGTQVIDTK.N              |                     | 13.82              | 10 | 1  |  |  |
|                                                                                |          |       |                   |       |     |          |              | 496                                                                                                             | 505   | 504.27 | 1006.52 | 1006.51 | 0.01       | 0       | 38      | 0.0125515     | R.EANLAASFGK.S               |                     | 20.41              |    |    |  |  |
|                                                                                |          |       |                   |       |     |          |              | Dihydrolipoyl dehydrogenase, mitochondrial OS=Homo sapiens GN=DLD PE=1 SV=1                                     |       |        |         |         |            |         |         |               |                              |                     |                    |    |    |  |  |
|                                                                                |          |       |                   |       |     |          |              | Oxidation (M)                                                                                                   |       |        |         |         |            |         |         |               |                              |                     |                    |    |    |  |  |
| Q5VTE0                                                                         | 8%       | 211   | 4                 | 50495 | 9.2 | Q5VTE0   | EF1A3_HUMAN  | 147                                                                                                             | 154   | 435.77 | 869.52  | 869.53  | -0.02      | 0       | 42      | 0.0045277     | K.QLIVGVNK.M                 |                     | 17.9               | 11 | 27 |  |  |
|                                                                                |          |       |                   |       |     |          |              | 248                                                                                                             | 255   | 488.27 | 974.53  | 974.54  | -0.01      | 0       | 36      | 0.0211882     | R.LPLQDYYK.I                 |                     | 20.57              |    |    |  |  |
|                                                                                |          |       |                   |       |     |          |              | 256                                                                                                             | 266   | 513.3  | 1024.58 | 1024.6  | -0.02      | 0       | 58      | 0.000111      | K.IGGIGTVPVGR.V              |                     | 20.09              |    |    |  |  |
|                                                                                |          |       |                   |       |     |          |              | 431                                                                                                             | 439   | 457.78 | 913.54  | 913.56  | -0.02      | 0       | 76      | 1.92E-06      | R.QTVAVGVK.A                 |                     | 17.94              |    |    |  |  |
|                                                                                |          |       |                   |       |     |          |              | Putative elongation factor 1-alpha-like 3 OS=Homo sapiens GN=EEF1A3 PE=5 SV=1                                   |       |        |         |         |            |         |         |               |                              |                     |                    |    |    |  |  |
| P80723                                                                         | 26%      | 143   | 3                 | 22680 | 4.6 | P80723   | BASP_HUMAN   | 98                                                                                                              | 121   | 766.68 | 2297.03 | 2297.13 | -0.1       | 1       | 47      | 0.0011993     | K.AEPPKAPEQEQAAPGPAAGGEAPK.A |                     | 13.93              | 12 | 1  |  |  |
|                                                                                |          |       |                   |       |     |          |              | 164                                                                                                             | 184   | 644.96 | 1931.85 | 1931.87 | -0.02      | 0       | 38      | 0.0087014     | K.SDGAPASDCKPGSSEAAPSSK.E    |                     | 12.67              |    |    |  |  |
|                                                                                |          |       |                   |       |     |          |              | 185                                                                                                             | 198   | 693.81 | 1385.61 | 1385.67 | -0.06      | 0       | 58      | 0.0001064     | K.ETPAATEAPSSTPK.A           |                     | 13.35              |    |    |  |  |
|                                                                                |          |       |                   |       |     |          |              | Brain acid soluble protein 1 OS=Homo sapiens GN=BASP1 PE=1 SV=2                                                 |       |        |         |         |            |         |         |               |                              |                     |                    |    |    |  |  |
| A6NI72                                                                         | 12%      | 188   | 3                 | 45017 | 9.2 | A6NI72   | NCF1B_HUMAN  | 57                                                                                                              | 71    | 852.4  | 1702.78 | 1702.8  | -0.01      | 0       | 73      | 3.35E-06      | K.EMFPIEAGAINPENR.I          |                     | 21.21              | 12 | 1  |  |  |
|                                                                                |          |       |                   |       |     |          |              | 148                                                                                                             | 163   | 875.45 | 1748.89 | 1748.93 | -0.04      | 0       | 56      | 0.000154      | K.STATDITGPILQTYR.A          | Oxidation (M)       | 22.04              |    |    |  |  |
|                                                                                |          |       |                   |       |     |          |              | 339                                                                                                             | 355   | 612.28 | 1833.82 | 1833.9  | -0.08      | 0       | 59      | 7.24E-05      | R.QARPGQSPGSPLEER.Q          |                     | 14.99              |    |    |  |  |
|                                                                                |          |       |                   |       |     |          |              | Putative neutrophil cytosol factor 1B OS=Homo sapiens GN=NCF1B PE=5 SV=2                                        |       |        |         |         |            |         |         |               |                              |                     |                    |    |    |  |  |
| Q14254                                                                         | 9%       | 156   | 3                 | 41830 | 5.2 | Q14254   | FLOT2_HUMAN  | 218                                                                                                             | 228   | 635.34 | 1268.66 | 1268.71 | -0.05      | 0       | 32      | 0.0476539     | K.QIAVEAQEILR.T              |                     | 21.25              | 12 | 1  |  |  |
|                                                                                |          |       |                   |       |     |          |              | 259                                                                                                             | 269   | 600.33 | 1198.65 | 1198.66 | -0.01      | 0       | 58      | 0.0001237     | K.QVLLAQAEAEK.I              |                     | 19.73              |    |    |  |  |
|                                                                                |          |       |                   |       |     |          |              | 308                                                                                                             | 321   | 742.43 | 1482.85 | 1482.85 | 0.01       | 0       | 34      | 0.0237813     | K.MALVLEALPQIAAK.I           | Oxidation (M)       | 22.56              |    |    |  |  |
|                                                                                |          |       |                   |       |     |          |              | Flotillin-2 OS=Homo sapiens GN=FLOT2 PE=1 SV=1                                                                  |       |        |         |         |            |         |         |               |                              |                     |                    |    |    |  |  |
| Q9BTU6                                                                         | 9%       | 149   | 4                 | 54388 | 8.5 | Q9BTU6   | IP4K2A_HUMAN | 116                                                                                                             | 123   | 465.24 | 928.46  | 928.5   | -0.03      | 0       | 33      | 0.0419704     | R.QAELAIER.C                 |                     | 16.64              | 12 | 1  |  |  |
|                                                                                |          |       |                   |       |     |          |              | 130                                                                                                             | 146   | 630.33 | 1887.97 | 1887.91 | 0.06       | 1       | 33      | 0.0274591     | R.IYQGSSGSYFVKDPQGR.I        |                     | 19.77              |    |    |  |  |
|                                                                                |          |       |                   |       |     |          |              | 203                                                                                                             | 210   | 477.29 | 952.56  | 952.57  | -0.01      | 0       | 39      | 0.007139      | K.LELNIVPR.T                 |                     | 21.3               |    |    |  |  |
|                                                                                |          |       |                   |       |     |          |              | 297                                                                                                             | 305   | 552.33 | 1102.65 | 1102.68 | -0.02      | 0       | 43      | 0.004145      | R.LVVLDIYIR.N                |                     | 23.48              |    |    |  |  |
| Phosphatidylinositol 4-kinase type 2-alpha OS=Homo sapiens GN=PI4K2A PE=1 SV=1 |          |       |                   |       |     |          |              |                                                                                                                 |       |        |         |         |            |         |         |               |                              |                     |                    |    |    |  |  |
| O14773                                                                         | 9%       | 209   | 4                 | 61723 | 6   | O14773   | TPP1_HUMAN   | 246                                                                                                             | 259   | 492.25 | 1473.73 | 1473.75 | -0.02      | 0       | 51      | 0.0005581     | R.LFGGNFHAQASVAR.V           |                     | 20.03              | 12 | 6  |  |  |
|                                                                                |          |       |                   |       |     |          |              | 340                                                                                                             | 346   | 425.7  | 849.39  | 849.43  | -0.04      | 0       | 42      | 0.0050291     | R.VNTELMK.A                  |                     | 13.09              |    |    |  |  |
|                                                                                |          |       |                   |       |     |          |              | 493                                                                                                             | 506   | 512.97 | 1535.9  | 1535.89 | 0          | 0       | 43      | 0.0031884     | R.ILSGRPLGFLNPR.L            | Oxidation (M)       | 21.38              |    |    |  |  |
|                                                                                |          |       |                   |       |     |          |              | 507                                                                                                             | 520   | 535.61 | 1603.8  | 1603.81 | -0.01      | 0       | 73      | 3.38E-06      | R.LYQQHGAGLFDVTR.G           |                     | 20.6               |    |    |  |  |
|                                                                                |          |       |                   |       |     |          |              | Tripeptidyl-peptidase 1 OS=Homo sapiens GN=TPP1 PE=1 SV=2                                                       |       |        |         |         |            |         |         |               |                              |                     |                    |    |    |  |  |
| O75955                                                                         | 8%       | 156   | 3                 | 47554 | 7.1 | O75955   | FLOT1_HUMAN  | 41                                                                                                              | 51    | 608.38 | 1214.74 | 1214.72 | 0.01       | 0       | 47      | 0.0018149     | R.ISLNTLTLNVK.S              |                     | 21.82              | 12 | 2  |  |  |
|                                                                                |          |       |                   |       |     |          |              | 262                                                                                                             | 274   | 735.36 | 1468.71 | 1468.76 | -0.05      | 0       | 50      | 0.0007454     | R.AQQVAVQEAEIAR.R            |                     | 16.22              |    |    |  |  |
|                                                                                |          |       |                   |       |     |          |              | 393                                                                                                             | 403   | 608.33 | 1214.64 | 1214.69 | -0.05      | 0       | 65      | 2.41E-05      | K.VTGEVLDLTLR.L              |                     | 22.38              |    |    |  |  |
|                                                                                |          |       |                   |       |     |          |              | Flotillin-1 OS=Homo sapiens GN=FLOT1 PE=1 SV=3                                                                  |       |        |         |         |            |         |         |               |                              |                     |                    |    |    |  |  |
| Q9Y6N5                                                                         | 6%       | 73    | 2                 | 50214 | 9.2 | Q9Y6N5   | SQRD_HUMAN   | 66                                                                                                              | 79    | 735.38 | 1468.74 | 1468.75 | -0.01      | 0       | 37      | 0.0152549     | K.VGAENVAVPEPSEER.H          |                     | 19.99              | 12 | 1  |  |  |
|                                                                                |          |       |                   |       |     |          |              | 345                                                                                                             | 358   | 672.37 | 1342.73 | 1342.72 | 0.01       | 0       | 36      | 0.0171465     | K.TAAAVAAQSGILDR.T           |                     | 20.21              |    |    |  |  |
|                                                                                |          |       |                   |       |     |          |              | Sulfide:quinone oxidoreductase, mitochondrial OS=Homo sapiens GN=SQRD PE=1 SV=1                                 |       |        |         |         |            |         |         |               |                              |                     |                    |    |    |  |  |
| P49411                                                                         | 6%       | 119   | 2                 | 49852 | 7.3 | P49411   | EFTTU_HUMAN  | 239                                                                                                             | 252   | 771.88 | 1541.75 | 1541.85 | -0.09      | 0       | 63      | 3.41E-05      | K.LLDAVDYTIYPVAR.D           |                     | 22.25              | 12 | 1  |  |  |
|                                                                                |          |       |                   |       |     |          |              | 316                                                                                                             | 327   | 593.3  | 1184.58 | 1184.61 | -0.03      | 0       | 56      | 0.0002089     | R.AEAGDNLGALVR.G             |                     | 20.64              |    |    |  |  |
|                                                                                |          |       |                   |       |     |          |              | Elongation factor Tu, mitochondrial OS=Homo sapiens GN=TUFM PE=1 SV=2                                           |       |        |         |         |            |         |         |               |                              |                     |                    |    |    |  |  |
| P39656                                                                         | 5%       | 103   | 2                 | 48893 | 5.4 | P39656   | OST48_HUMAN  | 30                                                                                                              | 40    | 635.39 | 1268.77 | 1268.75 | 0.02       | 0       | 61      | 5.26E-05      | R.TLVLLDNLNVR.E              |                     | 22.64              | 12 | 1  |  |  |
|                                                                                |          |       |                   |       |     |          |              | 223                                                                                                             | 233   | 585.34 | 1168.66 | 1168.69 | -0.03      | 0       | 42      | 0.0046552     | K.NTLIAGLQAR.N               |                     | 21.56              |    |    |  |  |
|                                                                                |          |       |                   |       |     |          |              | Dolichyl-diphosphooligosaccharide-protein glycosyltransferase 48 kDa subunit OS=Homo sapiens GN=DDOST PE=1 SV=2 |       |        |         |         |            |         |         |               |                              |                     |                    |    |    |  |  |
| P15848                                                                         | 4%       | 72    | 2                 | 60163 | 8.4 | P15848   | ARSB_HUMAN   | Arylsulfatase B OS=Homo sapiens GN=ARSB PE=1 SV=1                                                               |       |        |         |         |            |         |         |               |                              |                     |                    |    |    |  |  |







| accession # | coverage | score | distinct peptides | mass   | pI  | start AA | end AA      | m/z obs                                                           | M obs           | M calc   | delta | miss | pept score | exp val   | peptide             | modifications                          | retent time | Strongest gel slice | # gel slices found |
|-------------|----------|-------|-------------------|--------|-----|----------|-------------|-------------------------------------------------------------------|-----------------|----------|-------|------|------------|-----------|---------------------|----------------------------------------|-------------|---------------------|--------------------|
|             |          |       |                   |        |     | 2        | 17          | 913.93                                                            | 1825.84         | 1825.96  | -0.12 | 1    | 87         | 1.12E-07  | M.ASQSQGIQLLQAEKR.A | Acetyl (Protein N-term)                | 22.27       |                     |                    |
|             |          |       |                   |        |     | 38       | 48          | 683.24                                                            | 1364.46         | 1364.62  | -0.16 | 0    | 70         | 6.53E-06  | K.EEAQAEIEQYR.L     |                                        | 20.25       |                     |                    |
|             |          |       |                   |        |     | 81       | 89          | 594.75                                                            | 1187.49         | 1187.6   | -0.11 | 0    | 66         | 1.82E-05  | K.MTILQTYFR.Q       | Oxidation (M)                          | 22.92       |                     |                    |
| P62888      | 17%      | 86    | 2                 | 12947  | 9.7 | P62888   | RL30_HUMAN  | 60S ribosomal protein L30                                         | OS=Homo sapiens | GN=RPL30 | PE=1  | SV=2 |            |           |                     |                                        |             | 32                  | 1                  |
|             |          |       |                   |        |     | 10       | 17          | 453.18                                                            | 904.35          | 904.46   | -0.11 | 0    | 34         | 0.0308709 | K.SLESINSR.L        |                                        | 14.88       |                     |                    |
|             |          |       |                   |        |     | 45       | 56          | 677.3                                                             | 1352.59         | 1352.76  | -0.17 | 0    | 54         | 0.0002901 | K.LVILANNCALR.K     |                                        | 21.71       |                     |                    |
| P12830      | 2%       | 118   | 2                 | 97852  | 4.6 | P12830   | CADH1_HUMAN | Epithelial cadherin                                               | OS=Homo sapiens | GN=CDH1  | PE=1  | SV=3 |            |           |                     |                                        |             | 32                  | 1                  |
|             |          |       |                   |        |     | 66       | 74          | 537.21                                                            | 1072.4          | 1072.52  | -0.12 | 0    | 48         | 0.0012837 | R.TAYFSLDTR.F       |                                        | 21.66       |                     |                    |
|             |          |       |                   |        |     | 77       | 86          | 494.73                                                            | 987.45          | 987.56   | -0.11 | 0    | 69         | 1.06E-05  | K.VGTDGVITVK.R      |                                        | 19.01       |                     |                    |
| Q7Z7K0      | 17%      | 67    | 2                 | 12823  | 8.9 | Q7Z7K0   | COXAM_HUMAN | COX assembly mitochondrial protein homolog                        | OS=Homo sapiens | GN=CMC1  | PE=2  | SV=1 |            |           |                     |                                        |             | 33                  | 1                  |
|             |          |       |                   |        |     | 2        | 11          | 589.23                                                            | 1176.45         | 1176.59  | -0.14 | 0    | 33         | 0.0368933 | M.ALDPADQHLR.H      | Acetyl (Protein N-term)                | 20.6        |                     |                    |
|             |          |       |                   |        |     | 99       | 106         | 467.2                                                             | 932.39          | 932.5    | -0.11 | 1    | 35         | 0.0275585 | R.LQKLPISM.-        | Oxidation (M)                          | 15          |                     |                    |
| Q13510      | 5%       | 90    | 2                 | 45077  | 7.5 | Q13510   | ASAH1_HUMAN | Acid ceramidase                                                   | OS=Homo sapiens | GN=ASAH1 | PE=1  | SV=4 |            |           |                     |                                        |             | 34                  | 5                  |
|             |          |       |                   |        |     | 82       | 92          | 612.26                                                            | 1222.5          | 1222.6   | -0.1  | 0    | 39         | 0.0087254 | K.NMINTFVPSGK.V     | Oxidation (M)                          | 20.59       |                     |                    |
|             |          |       |                   |        |     | 93       | 100         | 482.21                                                            | 962.4           | 962.47   | -0.07 | 0    | 51         | 0.0006655 | K.VMQVVDK.L         | Oxidation (M)                          | 13.55       |                     |                    |
| P01024      | 2%       | 200   | 4                 | 188569 | 6   | P01024   | CO3_HUMAN   | Complement C3                                                     | OS=Homo sapiens | GN=C3    | PE=1  | SV=2 |            |           |                     |                                        |             | 34                  | 4                  |
|             |          |       |                   |        |     | 842      | 848         | 444.19                                                            | 886.37          | 886.45   | -0.09 | 0    | 47         | 0.0019026 | R.NEQVEIR.A         |                                        | 14.37       |                     |                    |
|             |          |       |                   |        |     | 882      | 891         | 574.78                                                            | 1147.54         | 1147.63  | -0.09 | 0    | 36         | 0.0166579 | R.HQQTVTIPPK.S      |                                        | 13.77       |                     |                    |
|             |          |       |                   |        |     | 892      | 904         | 701.36                                                            | 1400.71         | 1400.83  | -0.12 | 0    | 36         | 0.0168335 | K.SSLSPYVIVPLK.T    |                                        | 23.35       |                     |                    |
|             |          |       |                   |        |     | 905      | 913         | 501.9                                                             | 1001.79         | 1001.54  | 0.25  | 0    | 80         | 4.40E-07  | K.TGLQEVVKA         |                                        | 18.83       |                     |                    |
| P61604      | 33%      | 153   | 3                 | 10925  | 8.9 | P61604   | CH10_HUMAN  | 10 kDa heat shock protein, mitochondrial                          | OS=Homo sapiens | GN=HSPE1 | PE=1  | SV=2 |            |           |                     |                                        |             | 35                  | 2                  |
|             |          |       |                   |        |     | 41       | 54          | 658.33                                                            | 1314.64         | 1314.75  | -0.11 | 0    | 75         | 2.74E-06  | K.VLQATVVAVGSGSK.G  |                                        | 20.35       |                     |                    |
|             |          |       |                   |        |     | 57       | 66          | 507.23                                                            | 1012.45         | 1012.56  | -0.11 | 0    | 32         | 0.0474403 | K.GGEIQVSVK.V       |                                        | 15.88       |                     |                    |
|             |          |       |                   |        |     | 71       | 80          | 538.75                                                            | 1075.48         | 1075.59  | -0.11 | 0    | 47         | 0.0016797 | K.VLLPEYGGTK.V      |                                        | 20.97       |                     |                    |
| P63218      | 26%      | 104   | 2                 | 7428   | 9.9 | P63218   | GBG5_HUMAN  | Guanine nucleotide-binding protein G(I)/G(S)/G(O) subunit gamma-5 | OS=Homo sapiens | GN=GNG5  | PE=1  | SV=3 |            |           |                     |                                        |             | 36                  | 1                  |
|             |          |       |                   |        |     | 2        | 12          | 555.73                                                            | 1109.44         | 1109.54  | -0.1  | 1    | 65         | 2.14E-05  | M.SGSSVAAMKK.V      | Acetyl (Protein N-term); Oxidation (M) | 12.92       |                     |                    |
|             |          |       |                   |        |     | 19       | 25          | 386.68                                                            | 771.34          | 771.42   | -0.09 | 0    | 39         | 0.0113365 | R.LEAGLNR.V         |                                        | 14.53       |                     |                    |
| P07602      | 6%       | 157   | 3                 | 59899  | 5.1 | P07602   | SAP_HUMAN   | Proactivator polypeptide                                          | OS=Homo sapiens | GN=PSAP  | PE=1  | SV=2 |            |           |                     |                                        |             | 36                  | 2                  |
|             |          |       |                   |        |     | 233      | 242         | 539.21                                                            | 1076.41         | 1076.5   | -0.09 | 0    | 37         | 0.0138157 | R.LGPGMADICK.N      | Oxidation (M)                          | 15.95       |                     |                    |
|             |          |       |                   |        |     | 430      | 438         | 507.74                                                            | 1013.46         | 1013.58  | -0.12 | 0    | 79         | 1.12E-06  | K.QEILAALEK.G       |                                        | 21.73       |                     |                    |
|             |          |       |                   |        |     | 439      | 449         | 656.24                                                            | 1310.46         | 1310.6   | -0.14 | 0    | 41         | 0.0045646 | K.GCSFLDPYQK.Q      |                                        | 21.86       |                     |                    |

**\*Footnotes to Supplemental Table 9:**

Data sets were searched with the Mascot search engine (see Perkins et al. (1999) *Electrophoresis* **20**, 3551-3567).

Detailed are the SwissProt accession number, the number of distinct proteolytic peptides (in some cases the number of observed redundant peptide sequences is indicated in parentheses), and the sequence coverage of the protein (%).

Listed is the Mascot protein score as well as the score and expectation value for the individual peptides.

Additional columns indicate the position of the protein in the 1D-SDS PAGE gel (strongest gel slice in which the protein was identified, and the total # of adjacent gel slices in which the protein was found).

Proteins identified by single-peptide assignments for this experiment are not listed in this Table but in Supplemental Table 12.

**Supplemental Table 10. Proteins identified by HPLC-MS/MS in 3-day latex bead human THP-1 phagosome preparation.\***

ESI-MS/MS raw data obtained on a QSTAR Pulsar i instrument and Mascot search results for trypsin digestion of proteins separated on a 1D-SDS PAGE gel.  
For summary see Supplemental Table 1.

| accession # | coverage | score | distinct peptides | mass   | pl  | start AA | end AA      | m/z obs                                                          | M obs                                 | M calc | delta | miss   | pept score | exp val | peptide | modifications | retent time | Strongest gel slice | # gel slices found        |                 |       |    |  |
|-------------|----------|-------|-------------------|--------|-----|----------|-------------|------------------------------------------------------------------|---------------------------------------|--------|-------|--------|------------|---------|---------|---------------|-------------|---------------------|---------------------------|-----------------|-------|----|--|
| P27105      | 26%      | 283   | 6                 | 31882  | 7.7 | P27105   | STOM_HUMAN  | Erythrocyte band 7 integral membrane protein                     | OS=Homo sapiens GN=STOM PE=1 SV=3     | 98     | 111   | 801.53 | 1601.04    | 1600.87 | 0.17    | 0             | 35          | 0.0228255           | R.TISFDIPPPQEILT.K.D      | 33.11           | 1     | 5  |  |
|             |          |       |                   |        |     |          |             |                                                                  |                                       | 219    | 232   | 488.3  | 1461.88    | 1461.72 | 0.15    | 1             | 39          | 0.0090859           | R.AKVVIAAEGEMNASR.A       | Oxidation (M)   | 18.57 |    |  |
|             |          |       |                   |        |     |          |             |                                                                  |                                       | 221    | 232   | 632.37 | 1262.72    | 1262.59 | 0.12    | 0             | 72          | 4.30E-06            | K.VIAAEGEMNASR.A          | Oxidation (M)   | 19.01 |    |  |
|             |          |       |                   |        |     |          |             |                                                                  |                                       | 236    | 251   | 866.55 | 1731.09    | 1730.89 | 0.2     | 0             | 38          | 0.0096185           | K.EASMMVITESPAALQLR.Y     | Oxidation (M)   | 30.53 |    |  |
|             |          |       |                   |        |     |          |             |                                                                  |                                       | 252    | 263   | 676.46 | 1350.91    | 1350.74 | 0.17    | 0             | 67          | 1.13E-05            | R.YLQTLTTIAAEK.N          |                 | 30.31 |    |  |
|             |          |       |                   |        |     |          |             |                                                                  |                                       | 264    | 283   | 1072.2 | 2142.39    | 2142.18 | 0.21    | 0             | 31          | 0.0413291           | K.NSTIVFPFLPIDMLQGIIGAK.H | Oxidation (M)   | 37.1  |    |  |
| P11279      | 9%       | 182   | 3                 | 45367  | 9   | P11279   | LAMP1_HUMAN | Lysosome-associated membrane glycoprotein 1                      | OS=Homo sapiens GN=LAMP1 PE=1 SV=3    | 138    | 146   | 517.33 | 1032.65    | 1032.55 | 0.1     | 0             | 53          | 0.0004044           | K.TVESITDIR.A             | 28.65           | 1     | 12 |  |
|             |          |       |                   |        |     |          |             |                                                                  |                                       | 299    | 314   | 923.61 | 1845.21    | 1845.01 | 0.19    | 0             | 74          | 2.20E-06            | R.FFLQGIQLNITLPDAR.D      | 36.23           |       |    |  |
|             |          |       |                   |        |     |          |             |                                                                  |                                       | 327    | 337   | 576.36 | 1150.71    | 1150.6  | 0.11    | 0             | 55          | 0.0002318           | R.ALQATVGNYSYK.C          | 22.09           |       |    |  |
|             |          |       |                   |        |     |          |             |                                                                  |                                       |        |       |        |            |         |         |               |             |                     |                           |                 |       |    |  |
| Q13488      | 5%       | 212   | 4                 | 93680  | 6.6 | Q13488   | VPP3_HUMAN  | Vacuolar proton translocating ATPase 116 kDa subunit a isoform 3 | OS=Homo sapiens GN=TCIRG1 PE=1 SV=2   | 29     | 38    | 566.88 | 1131.74    | 1131.63 | 0.12    | 0             | 76          | 1.70E-06            | R.LGELGLVVEFR.D           | 33.28           | 1     | 5  |  |
|             |          |       |                   |        |     |          |             |                                                                  |                                       | 277    | 284   | 460.31 | 918.6      | 918.53  | 0.08    | 0             | 36          | 0.0238435           | R.FLSQVLR.V               | 30.22           |       |    |  |
|             |          |       |                   |        |     |          |             |                                                                  |                                       | 328    | 337   | 563.37 | 1124.73    | 1124.62 | 0.11    | 0             | 45          | 0.0020147           | R.DLPALEALR.D             | 32.28           |       |    |  |
|             |          |       |                   |        |     |          |             |                                                                  |                                       | 338    | 351   | 497.59 | 1489.76    | 1489.65 | 0.11    | 0             | 54          | 0.0002526           | R.DSSMEEGVSAVAHR.I        | Oxidation (M)   | 20.35 |    |  |
|             |          |       |                   |        |     |          |             |                                                                  |                                       |        |       |        |            |         |         |               |             |                     |                           |                 |       |    |  |
| Q8TED4      | 5%       | 118   | 2                 | 55256  | 6.4 | Q8TED4   | SPX2_HUMAN  | Sugar phosphate exchanger 2                                      | OS=Homo sapiens GN=SLC37A2 PE=2 SV=2  | 266    | 274   | 467.29 | 932.57     | 932.48  | 0.09    | 0             | 57          | 0.0001637           | R.ESGLETVAK.C             | 20.79           | 1     | 1  |  |
|             |          |       |                   |        |     |          |             |                                                                  |                                       | 278    | 293   | 861.5  | 1720.99    | 1720.82 | 0.16    | 0             | 60          | 5.52E-05            | K.GPCEEPAAISFFGALR.I      | 35.06           |       |    |  |
|             |          |       |                   |        |     |          |             |                                                                  |                                       |        |       |        |            |         |         |               |             |                     |                           |                 |       |    |  |
| O75844      | 5%       | 84    | 2                 | 55063  | 7.1 | O75844   | FACE1_HUMAN | CAAX prenyl protease 1 homolog                                   | OS=Homo sapiens GN=ZMPSTE24 PE=1 SV=2 | 293    | 303   | 646.85 | 1291.68    | 1291.54 | 0.14    | 0             | 47          | 0.0014389           | K.DIQEDSGMEPR.N           | 19.79           | 1     | 1  |  |
|             |          |       |                   |        |     |          |             |                                                                  |                                       | 304    | 314   | 639.3  | 1276.59    | 1276.54 | 0.05    | 0             | 38          | 0.0109636           | R.NEEEGNSEEIK.A           | 18.7            |       |    |  |
|             |          |       |                   |        |     |          |             |                                                                  |                                       |        |       |        |            |         |         |               |             |                     |                           |                 |       |    |  |
| P05023      | 3%       | 93    | 2                 | 114135 | 5.3 | P05023   | AT1A1_HUMAN | Sodium/potassium-transporting ATPase subunit alpha-1             | OS=Homo sapiens GN=ATP1A1 PE=1 SV=1   | 213    | 227   | 810.46 | 1618.9     | 1618.74 | 0.16    | 0             | 57          | 0.0001323           | K.VDNSSLTGESEPQTR.S       | 21.18           | 1     | 1  |  |
|             |          |       |                   |        |     |          |             |                                                                  |                                       | 228    | 240   | 760.46 | 1518.9     | 1518.7  | 0.21    | 0             | 36          | 0.0183464           | R.SPDTNENPLETR.N          | 30.09           |       |    |  |
|             |          |       |                   |        |     |          |             |                                                                  |                                       |        |       |        |            |         |         |               |             |                     |                           |                 |       |    |  |
| Q93050      | 2%       | 94    | 2                 | 97148  | 6   | Q93050   | VPP1_HUMAN  | Vacuolar proton translocating ATPase 116 kDa subunit a isoform 1 | OS=Homo sapiens GN=ATP6V0A1 PE=1 SV=3 | 39     | 49    | 658.91 | 1315.81    | 1315.65 | 0.16    | 0             | 51          | 0.0006881           | R.DLNPDVNVFQR.K           | 31.23           | 1     | 1  |  |
|             |          |       |                   |        |     |          |             |                                                                  |                                       | 121    | 129   | 553.9  | 1105.79    | 1105.6  | 0.19    | 0             | 44          | 0.0029334           | R.NFLELTELK.F             | 33.41           |       |    |  |
|             |          |       |                   |        |     |          |             |                                                                  |                                       |        |       |        |            |         |         |               |             |                     |                           |                 |       |    |  |
| O15118      | 2%       | 106   | 2                 | 144868 | 5.2 | O15118   | NPC1_HUMAN  | Niemann-Pick C1 protein                                          | OS=Homo sapiens GN=NPC1 PE=1 SV=2     | 715    | 726   | 679.44 | 1356.86    | 1356.7  | 0.16    | 0             | 69          | 8.97E-06            | R.LQGETLDQQLR.V           | 28.3            | 1     | 2  |  |
|             |          |       |                   |        |     |          |             |                                                                  |                                       | 988    | 997   | 403.22 | 1206.63    | 1206.56 | 0.08    | 0             | 37          | 0.0137448           | K.QRPPQGGDFMR.F           | 18.53           |       |    |  |
|             |          |       |                   |        |     |          |             |                                                                  |                                       |        |       |        |            |         |         |               |             |                     |                           |                 |       |    |  |
| P62988      | 29%      | 70    | 2                 | 8560   | 6.6 | P62988   | UBIQ_HUMAN  | Ubiquitin                                                        | OS=Homo sapiens GN=RPS27A PE=1 SV=1   | 1      | 6     | 391.26 | 780.52     | 780.42  | 0.09    | 0             | 31          | 0.0468002           | -.MQIFVK.T                | 29.74           | 2     | 3  |  |
|             |          |       |                   |        |     |          |             |                                                                  |                                       | 12     | 27    | 894.61 | 1787.2     | 1786.92 | 0.28    | 0             | 39          | 0.0076756           | K.TITLEVEPSTIENVK.A       | 37.7            |       |    |  |
|             |          |       |                   |        |     |          |             |                                                                  |                                       |        |       |        |            |         |         |               |             |                     |                           |                 |       |    |  |
| P35579      | 4%       | 369   | 7                 | 227646 | 5.5 | P35579   | MYH9_HUMAN  | Myosin-9                                                         | OS=Homo sapiens GN=MYH9 PE=1 SV=4     | 290    | 299   | 603.39 | 1204.76    | 1204.63 | 0.12    | 0             | 39          | 0.0090237           | K.TDLLLEPYNK.Y            | 37.65           | 2     | 1  |  |
|             |          |       |                   |        |     |          |             |                                                                  |                                       | 359    | 373   | 804.47 | 1606.93    | 1606.69 | 0.24    | 0             | 64          | 2.61E-05            | R.NTDQASMPDNTAAQK.V       | Oxidation (M)   | 20.69 |    |  |
|             |          |       |                   |        |     |          |             |                                                                  |                                       | 746    | 755   | 597.39 | 1192.77    | 1192.61 | 0.16    | 0             | 43          | 0.0032554           | K.ALELDSNLYR.I            | 37.09           |       |    |  |
|             |          |       |                   |        |     |          |             |                                                                  |                                       | 1446   | 1454  | 546.86 | 1091.7     | 1091.55 | 0.16    | 0             | 38          | 0.0113352           | K.FDQLLAEK.T              | 35.39           |       |    |  |
|             |          |       |                   |        |     |          |             |                                                                  |                                       | 1504   | 1518  | 572.99 | 1175.96    | 1175.72 | 0.23    | 1             | 32          | 0.0375734           | R.TEMEDLMSKDDVVGK.S       | 2 Oxidation (M) | 22.98 |    |  |
|             |          |       |                   |        |     |          |             |                                                                  |                                       | 1878   | 1888  | 666.36 | 1330.72    | 1330.6  | 0.12    | 0             | 65          | 2.40E-05            | R.ELEEAEAAQR.A            | 24.45           |       |    |  |
|             |          |       |                   |        |     |          |             |                                                                  |                                       | 1899   | 1912  | 791.4  | 1580.79    | 1580.66 | 0.13    | 0             | 89          | 8.86E-08            | R.ELEDATETADAMNR.E        | Oxidation (M)   | 25.83 |    |  |
|             |          |       |                   |        |     |          |             |                                                                  |                                       |        |       |        |            |         |         |               |             |                     |                           |                 |       |    |  |
| P15144      | 12%      | 566   | 12 (13)           | 109870 | 5.3 | P15144   | AMPN_HUMAN  | Aminopeptidase N                                                 | OS=Homo sapiens GN=ANPEP PE=1 SV=4    | 141    | 152   | 585.42 | 1168.83    | 1168.57 | 0.26    | 0             | 40          | 0.0065373           | R.GVGGSPDPIDK.T           | 26.58           | 3     | 3  |  |
|             |          |       |                   |        |     |          |             |                                                                  |                                       | 205    | 218   | 502.64 | 1504.91    | 1504.77 | 0.14    | 1             | 36          | 0.0157042           | R.KVVATTQMQAADAR.K        | Oxidation (M)   | 21.65 |    |  |
|             |          |       |                   |        |     |          |             |                                                                  |                                       | 205    | 218   | 753.58 | 1505.14    | 1504.77 | 0.37    | 1             | 48          | 0.0005127           | R.KVVATTQMQAADAR.K        | Oxidation (M)   | 21.87 |    |  |
|             |          |       |                   |        |     |          |             |                                                                  |                                       | 205    | 219   | 545.36 | 1633.07    | 1632.86 | 0.21    | 2             | 33          | 0.0288992           | R.KVVATTQMQAADARK.S       | Oxidation (M)   | 21.27 |    |  |
|             |          |       |                   |        |     |          |             |                                                                  |                                       | 206    | 218   | 689.4  | 1376.79    | 1376.67 | 0.12    | 0             | 94          | 3.04E-08            | K.VVATTQMQAADAR.K         | Oxidation (M)   | 22.48 |    |  |
|             |          |       |                   |        |     |          |             |                                                                  |                                       | 242    | 252   | 609.88 | 1217.75    | 1217.63 | 0.12    | 0             | 42          | 0.0054503           | K.DLTALSNMLPK.G           | Oxidation (M)   | 39.23 |    |  |
|             |          |       |                   |        |     |          |             |                                                                  |                                       | 293    | 301   | 479.37 | 956.72     | 956.54  | 0.18    | 0             | 58          | 9.53E-05            | K.QASNGVLIIR.I            | 30.98           |       |    |  |
|             |          |       |                   |        |     |          |             |                                                                  |                                       | 364    | 379   | 863    | 1723.99    | 1723.83 | 0.16    | 0             | 37          | 0.0114696           | R.ENSLFLDPLSSSSSNK.E      | 40.34           |       |    |  |
|             |          |       |                   |        |     |          |             |                                                                  |                                       |        |       |        |            |         |         |               |             |                     |                           |                 |       |    |  |
|             |          |       |                   |        |     |          |             |                                                                  |                                       |        |       |        |            |         |         |               |             |                     |                           |                 |       |    |  |





| accession # | coverage | score | distinct peptides | mass  | pl  | start AA | end AA                                               | m/z obs                                                                                                     | M obs                                                                                                | M calc                                                                                                                                                     | delta                                                                                                                                                                | miss                                                                                                                                                              | pept score                                                                                                                  | exp val                                                                      | peptide                                                                                      | modifications                                                                                                                                                                                                                                                                                                                                                                                                                                                                            | retent time                                                                           | Strongest gel slice                                                                                                                          | # gel slices found |   |
|-------------|----------|-------|-------------------|-------|-----|----------|------------------------------------------------------|-------------------------------------------------------------------------------------------------------------|------------------------------------------------------------------------------------------------------|------------------------------------------------------------------------------------------------------------------------------------------------------------|----------------------------------------------------------------------------------------------------------------------------------------------------------------------|-------------------------------------------------------------------------------------------------------------------------------------------------------------------|-----------------------------------------------------------------------------------------------------------------------------|------------------------------------------------------------------------------|----------------------------------------------------------------------------------------------|------------------------------------------------------------------------------------------------------------------------------------------------------------------------------------------------------------------------------------------------------------------------------------------------------------------------------------------------------------------------------------------------------------------------------------------------------------------------------------------|---------------------------------------------------------------------------------------|----------------------------------------------------------------------------------------------------------------------------------------------|--------------------|---|
| P15586      | 3%       | 52    | 2                 | 62840 | 8.6 | P15586   | GNS_HUMAN N-acetylglucosamine-6-sulfatase            | 247<br>494                                                                                                  | 255<br>502                                                                                           | 525.35<br>493.28                                                                                                                                           | 1048.68<br>984.54                                                                                                                                                    | 1048.55<br>984.55                                                                                                                                                 | 0.14<br>-0.01                                                                                                               | 0<br>0                                                                       | 40<br>35                                                                                     | 0.0073746 K.AFQNVFAPR.N<br>0.0241043 K.TIDPELLGK.M                                                                                                                                                                                                                                                                                                                                                                                                                                       |                                                                                       |                                                                                                                                              | 7                  | 1 |
|             |          |       |                   |       |     |          |                                                      |                                                                                                             |                                                                                                      |                                                                                                                                                            |                                                                                                                                                                      |                                                                                                                                                                   |                                                                                                                             |                                                                              |                                                                                              |                                                                                                                                                                                                                                                                                                                                                                                                                                                                                          | 35.85<br>34.94                                                                        |                                                                                                                                              |                    |   |
| P38606      | 21%      | 569   | 10                | 68660 | 5.3 | P38606   | VATA_HUMAN Vacuolar ATP synthase catalytic subunit A | 121<br>221<br>257<br>281<br>309<br>339<br>365<br>537<br>586<br>599                                          | 129<br>232<br>265<br>289<br>323<br>353<br>381<br>552<br>596<br>613                                   | 451.77<br>439.61<br>481.81<br>525.76<br>766.42<br>579.27<br>899.44<br>934.53<br>416.58<br>909.01                                                           | 901.54<br>1315.8<br>961.6<br>1049.51<br>1530.82<br>1734.78<br>1796.87<br>1867.04<br>1246.72<br>1816.01                                                               | 901.5<br>1315.74<br>961.54<br>1049.48<br>1530.78<br>1734.66<br>1796.84<br>1866.83<br>1246.66<br>1815.81                                                           | 0.04<br>0.06<br>0.05<br>0.03<br>0.04<br>0.12<br>0.03<br>0.21<br>0.06<br>0.2                                                 | 0<br>0<br>0<br>0<br>0<br>0<br>0<br>0<br>2<br>0                               | 48<br>46<br>40<br>61<br>84<br>69<br>63<br>39<br>75                                           | 0.0014995 R.GVNVLSALS.R.D<br>0.0022345 K.LPANHPLLTQGR.V<br>0.0081492 K.TVISQSLSK.Y<br>5.70E-05 R.GNEMSEVLR.D<br>2.80E-07 R.TALVANTSMPVAAR.E<br>0.0024869 R.DMGYHVSMMADSTSR.W<br>6.93E-06 R.LAEMPADSGYPAYLGAR.L<br>3.25E-05 K.TVGMNSMIAFYDMAR.R<br>0.0096589 K.FKDPDKDGEAK.I<br>1.80E-06 K.SDYAQLLEDMQNAFR.S                                                                                                                                                                              | Oxidation (M)<br>Oxidation (M)<br>3 Oxidation (M)<br>Oxidation (M)<br>3 Oxidation (M) | 30.57<br>26.27<br>27.09<br>22.99<br>25.68<br>22.1<br>34.2<br>35.89<br>24.09<br>37.28                                                         | 8                  | 5 |
| P38646      | 11%      | 321   | 6                 | 73920 | 5.9 | P38646   | GRP75_HUMAN Stress-70 protein, mitochondrial         | 77<br>86<br>188<br>207<br>293<br>635                                                                        | 85<br>99<br>202<br>218<br>307<br>646                                                                 | 479.8<br>725.9<br>847.99<br>621.91<br>569.65<br>616.38                                                                                                     | 957.58<br>1449.78<br>1693.97<br>1241.81<br>1705.91<br>1230.74                                                                                                        | 957.49<br>1449.71<br>1693.84<br>1241.67<br>1705.83<br>1230.66                                                                                                     | 0.09<br>0.07<br>0.12<br>0.13<br>0.08<br>0.08                                                                                | 0<br>0<br>0<br>1<br>0                                                        | 49<br>65<br>47<br>49<br>40<br>71                                                             | 0.0009993 K.VLENAEGAR.T<br>1.96E-05 R.TTTPSVVAFADGER.L<br>0.0012136 K.NAVITVPAYFNDQSQR.Q<br>0.0010018 K.DAGQISGLNVLR.V<br>0.0070455 R.ETGVDLTKDNMALQR.V<br>6.60E-06 R.QAASSLQQASLK.L                                                                                                                                                                                                                                                                                                     | Oxidation (M)                                                                         | 21.33<br>34.59<br>36.28<br>35.84<br>31.29<br>24.93                                                                                           | 8                  | 1 |
| P11142      | 9%       | 240   | 5                 | 71082 | 5.4 | P11142   | HSP7C_HUMAN Heat shock cognate 71 kDa protein        | 26<br>37<br>57<br>160<br>349                                                                                | 36<br>49<br>71<br>171<br>357                                                                         | 614.86<br>744.41<br>833.5<br>600.42<br>541.3                                                                                                               | 1227.7<br>1486.8<br>1664.99<br>1198.82<br>1080.58                                                                                                                    | 1227.62<br>1486.69<br>1664.78<br>1198.67<br>1080.56                                                                                                               | 0.08<br>0.1<br>0.21<br>0.15<br>0.02                                                                                         | 0<br>0<br>0<br>0<br>0                                                        | 52<br>46<br>55<br>45<br>41                                                                   | 0.0004842 K.VEIANDQGNR.T<br>0.0019164 R.TTTPSYVAFDTER.L<br>0.0001932 K.NQVAMNPTNTVFDAK.R<br>0.0020735 K.DAGTIAGLNVLR.I<br>0.0047583 K.LLQDFFNKG.E                                                                                                                                                                                                                                                                                                                                        | Oxidation (M)                                                                         | 26.23<br>34.28<br>32.59<br>36.8<br>37.24                                                                                                     | 8                  | 1 |
| P13796      | 6%       | 144   | 3                 | 70815 | 5.2 | P13796   | PLSL_HUMAN Plastin-2                                 | 166<br>348<br>473                                                                                           | 178<br>357<br>488                                                                                    | 759.96<br>568.31<br>838.48                                                                                                                                 | 1517.91<br>1134.61<br>1674.95                                                                                                                                        | 1517.74<br>1134.6<br>1674.83                                                                                                                                      | 0.17<br>0<br>0.11                                                                                                           | 0<br>0<br>0                                                                  | 65<br>41<br>37                                                                               | 2.15E-05 K.MINLSVPTDIDER.T<br>0.0052843 R.QFVTATDVVR.G<br>0.0116084 K.FSLVIGGQDLNENR.T                                                                                                                                                                                                                                                                                                                                                                                                   | Oxidation (M)                                                                         | 35.45<br>33.29<br>36.89                                                                                                                      | 8                  | 1 |
| P08107      | 5%       | 137   | 3                 | 70294 | 5.5 | P08107   | HSP71_HUMAN Heat shock 70 kDa protein 1              | 26<br>37<br>349                                                                                             | 36<br>49<br>357                                                                                      | 614.86<br>744.41<br>555.34                                                                                                                                 | 1227.7<br>1486.8<br>1108.67                                                                                                                                          | 1227.62<br>1486.69<br>1108.57                                                                                                                                     | 0.08<br>0.1<br>0.1                                                                                                          | 0<br>0<br>0                                                                  | 52<br>46<br>39                                                                               | 0.0004842 K.VEIANDQGNR.T<br>0.0019164 R.TTTPSYVAFDTER.L<br>0.0082449 K.LLQDFFNDR.D                                                                                                                                                                                                                                                                                                                                                                                                       |                                                                                       | 26.23<br>34.28<br>37.55                                                                                                                      | 8                  | 1 |
| O00571      | 3%       | 115   | 2                 | 73597 | 6.7 | O00571   | DDX3X_HUMAN ATP-dependent RNA helicase DDX3X         | 408<br>492                                                                                                  | 418<br>503                                                                                           | 582.34<br>584.92                                                                                                                                           | 1162.67<br>1167.83                                                                                                                                                   | 1162.58<br>1167.7                                                                                                                                                 | 0.08<br>0.13                                                                                                                | 0<br>0                                                                       | 80<br>35                                                                                     | 7.38E-07 R.VGSTSENITQK.V<br>0.0163757 K.SPILVATAVAAR.G                                                                                                                                                                                                                                                                                                                                                                                                                                   |                                                                                       | 21.23<br>34.81                                                                                                                               | 8                  | 3 |
| P10809      | 35%      | 835   | 16                | 61187 | 5.7 | P10809   | CH60_HUMAN 60 kDa heat shock protein, mitochondrial  | 38<br>134<br>206<br>222<br>251<br>293<br>302<br>345<br>397<br>406<br>421<br>430<br>447<br>463<br>474<br>482 | 58<br>141<br>221<br>233<br>268<br>301<br>309<br>359<br>405<br>418<br>429<br>446<br>462<br>469<br>481 | 715.83<br>428.27<br>647.05<br>695.39<br>640.41<br>456.82<br>417.21<br>549.68<br>451.3<br>454.59<br>480.78<br>842.99<br>886.5<br>393.27<br>430.79<br>608.38 | 2144.45<br>854.52<br>1938.13<br>1388.76<br>1918.22<br>911.62<br>832.4<br>1646.03<br>900.58<br>1360.75<br>959.54<br>1683.97<br>1770.99<br>784.53<br>859.56<br>1214.75 | 2144.12<br>854.46<br>1937.94<br>1388.7<br>1918.06<br>911.58<br>832.38<br>1645.9<br>900.53<br>1360.68<br>959.5<br>1683.9<br>1770.85<br>784.51<br>859.48<br>1214.65 | 0.33<br>0.06<br>0.19<br>0.07<br>0.16<br>0.04<br>0.02<br>0.13<br>0.05<br>0.07<br>0.04<br>0.07<br>0.14<br>0.02<br>0.08<br>0.1 | 0<br>1<br>1<br>0<br>0<br>0<br>1<br>1<br>1<br>1<br>0<br>0<br>0<br>0<br>0<br>0 | 66<br>39<br>42<br>59<br>45<br>67<br>50<br>33<br>47<br>41<br>62<br>76<br>32<br>40<br>48<br>58 | 1.51E-05 R.ALMLQGVDLLADAVAVTMGPK.G<br>0.0080506 K.GANPVEIR.R<br>0.0036837 K.TLNDELIEIGMKFDR.G<br>9.78E-05 R.GYISPYFINTSK.G<br>0.0017071 K.ISSIQSIVPALEIANHR.K<br>1.08E-05 K.VGLQVAVK.A<br>0.0007946 K.APGFGDNR.K<br>0.0311734 K.VGEVIVTKDDAMLLK.G<br>0.016891 K.LSDGVAVLK.V<br>0.0059007 K.VGGTSDEVNEKK.D<br>5.65E-05 R.VTDALNATR.A<br>1.62E-06 R.AAVEEIGLVGGGCALLR.C<br>0.0450369 R.CIPALDSLTPANEDQK.I<br>0.0065167 K.IGIEIIR.R<br>0.0015768 K.IPAMTIAK.N<br>0.0001212 K.NAGVEGSLIVEK.I | 2 Oxidation (M)<br>Oxidation (M)<br>Oxidation (M)                                     | 40.56<br>24.75<br>37.01<br>35.66<br>37.48<br>32.93<br>22.87<br>33.28<br>32.71<br>20.73<br>23.09<br>37.09<br>35.49<br>34.71<br>22.12<br>32.54 | 9                  | 3 |
| P11117      | 11%      | 220   | 5                 | 48713 | 6.3 | P11117   | PPAL_HUMAN Lysosomal acid phosphatase                | 35<br>242<br>255<br>349<br>357                                                                              | 41<br>252<br>265<br>356<br>364                                                                       | 456.31<br>672.42<br>584.4<br>524.83<br>441.77                                                                                                              | 910.6<br>1342.84<br>1166.79<br>1047.64<br>881.53                                                                                                                     | 910.53<br>1342.69<br>1166.71<br>1047.52<br>881.52                                                                                                                 | 0.07<br>0.14<br>0.07<br>0.12<br>0.01                                                                                        | 0<br>0<br>0<br>0<br>0                                                        | 40<br>45<br>61<br>40<br>34                                                                   | 0.0052291 R.FVTLLYR.H<br>0.0023892 R.FLFGYQQAQK.A<br>4.59E-05 R.LQGGVLLAQIR.K<br>0.0088191 R.CPLQDFLR.L<br>0.0230436 R.LTEPVPVK.D                                                                                                                                                                                                                                                                                                                                                        |                                                                                       | 36.09<br>37.65<br>35.75<br>36.57<br>29.02                                                                                                    | 9                  | 4 |

| accession #                                                                   | coverage | score   | distinct peptides | mass  | pl  | start AA                                                                             | end AA  | m/z obs | M obs   | M calc  | delta | miss                                               | pept score | exp val                     | peptide           | modifications | retent time | Strongest gel slice | # gel slices found |                  |                |          |                   |               |       |    |   |  |  |  |  |  |  |  |
|-------------------------------------------------------------------------------|----------|---------|-------------------|-------|-----|--------------------------------------------------------------------------------------|---------|---------|---------|---------|-------|----------------------------------------------------|------------|-----------------------------|-------------------|---------------|-------------|---------------------|--------------------|------------------|----------------|----------|-------------------|---------------|-------|----|---|--|--|--|--|--|--|--|
| P30101                                                                        | 14%      | 352     | 6                 | 57146 | 6   | P30101 P                                                                             | 63 73   | 596.45  | 1190.89 | 1190.59 | 0.29  | 0                                                  | 69         | 6.31E-06                    | R.LAPEYEAAATR.L   |               | 27.81       | 10                  | 1                  |                  |                |          |                   |               |       |    |   |  |  |  |  |  |  |  |
|                                                                               |          |         |                   |       |     | 297 304                                                                              | 439.27  | 876.53  | 876.48  | 0.05    | 0     | 43                                                 | 0.0044206  | K.LNFVAASR.K                |                   | 32.75         |             |                     |                    |                  |                |          |                   |               |       |    |   |  |  |  |  |  |  |  |
|                                                                               |          |         |                   |       |     | 336 344                                                                              | 594.83  | 1187.65 | 1187.53 | 0.12    | 0     | 48                                                 | 0.00127    | K.FVMQEFSR.D                | Oxidation (M)     | 30.75         |             |                     |                    |                  |                |          |                   |               |       |    |   |  |  |  |  |  |  |  |
|                                                                               |          |         |                   |       |     | 367 379                                                                              | 685     | 1367.99 | 1367.66 | 0.33    | 0     | 68                                                 | 9.10E-06   | K.SEPIPESNDGSPVK.V          |                   | 26.09         |             |                     |                    |                  |                |          |                   |               |       |    |   |  |  |  |  |  |  |  |
|                                                                               |          |         |                   |       |     | 434 448                                                                              | 840.93  | 1679.85 | 1679.75 | 0.1     | 0     | 84                                                 | 2.86E-07   | K.MDATANDVPSPEYV.R.G        | Oxidation (M)     | 32.36         |             |                     |                    |                  |                |          |                   |               |       |    |   |  |  |  |  |  |  |  |
|                                                                               |          |         |                   |       |     | 483 496                                                                              | 527.31  | 1578.91 | 1578.83 | 0.09    | 0     | 41                                                 | 0.0048405  | R.EATNPVIEEKP.K             |                   | 22.79         |             |                     |                    |                  |                |          |                   |               |       |    |   |  |  |  |  |  |  |  |
|                                                                               |          |         |                   |       |     | Protein disulfide-isomerase A3 OS=Homo sapiens GN=PDI A3 PE=1 SV=4                   |         |         |         |         |       |                                                    |            |                             |                   |               |             |                     |                    |                  |                |          |                   |               |       |    |   |  |  |  |  |  |  |  |
|                                                                               |          |         |                   |       |     | A3 OS=Homo sapiens GN=PDI A3 PE=1 SV=4                                               |         |         |         |         |       |                                                    |            |                             |                   |               |             |                     |                    |                  |                |          |                   |               |       |    |   |  |  |  |  |  |  |  |
| P07237                                                                        | 14%      | 369     | 7                 | 57480 | 4.8 | P07237 P                                                                             | 70 78   | 501.81  | 1001.6  | 1001.55 | 0.05  | 1                                                  | 42         | 0.0061046                   | K.LKAEKSEIR.L     |               | 20.67       | 10                  | 1                  |                  |                |          |                   |               |       |    |   |  |  |  |  |  |  |  |
|                                                                               |          |         |                   |       |     | 277 283                                                                              | 377.21  | 752.41  | 752.37  | 0.04    | 0     | 36                                                 | 0.0155079  | K.TAAESFK.G                 |                   | 21.31         |             |                     |                    |                  |                |          |                   |               |       |    |   |  |  |  |  |  |  |  |
|                                                                               |          |         |                   |       |     | 317 326                                                                              | 611.87  | 1221.72 | 1221.62 | 0.1     | 0     | 42                                                 | 0.0040514  | R.LITTLEEMTK.Y              | Oxidation (M)     | 32.27         |             |                     |                    |                  |                |          |                   |               |       |    |   |  |  |  |  |  |  |  |
|                                                                               |          |         |                   |       |     | 327 338                                                                              | 484.6   | 1450.77 | 1450.69 | 0.08    | 0     | 62                                                 | 3.85E-05   | K.YKPESEELTAER.I            |                   | 23.6          |             |                     |                    |                  |                |          |                   |               |       |    |   |  |  |  |  |  |  |  |
|                                                                               |          |         |                   |       |     | 376 385                                                                              | 607.3   | 1212.59 | 1212.53 | 0.06    | 0     | 59                                                 | 9.70E-05   | K.NFEDVAFDEK.K              |                   | 34.35         |             |                     |                    |                  |                |          |                   |               |       |    |   |  |  |  |  |  |  |  |
|                                                                               |          |         |                   |       |     | 425 436                                                                              | 655.33  | 1308.64 | 1308.59 | 0.05    | 0     | 93                                                 | 3.28E-08   | K.MDSTANEVAVK.V             | Oxidation (M)     | 23.47         |             |                     |                    |                  |                |          |                   |               |       |    |   |  |  |  |  |  |  |  |
|                                                                               |          |         |                   |       |     | 453 461                                                                              | 533.8   | 1065.59 | 1065.51 | 0.08    | 0     | 35                                                 | 0.02182    | R.TVIDYNGER.T               |                   | 27.43         |             |                     |                    |                  |                |          |                   |               |       |    |   |  |  |  |  |  |  |  |
|                                                                               |          |         |                   |       |     | Protein disulfide-isomerase OS=Homo sapiens GN=P4HB PE=1 SV=3                        |         |         |         |         |       |                                                    |            |                             |                   |               |             |                     |                    |                  |                |          |                   |               |       |    |   |  |  |  |  |  |  |  |
|                                                                               |          |         |                   |       |     | OS=Homo sapiens GN=P4HB PE=1 SV=3                                                    |         |         |         |         |       |                                                    |            |                             |                   |               |             |                     |                    |                  |                |          |                   |               |       |    |   |  |  |  |  |  |  |  |
| P08962                                                                        | 8%       | 145     | 3                 | 26474 | 8.1 | P08962 C                                                                             | 109 120 | 506.24  | 1515.71 | 1515.68 | 0.03  | 1                                                  | 46         | 0.0020009                   | R.DKVMSEFNPNFR.Q  | Oxidation (M) | 31.66       | 10                  | 15                 |                  |                |          |                   |               |       |    |   |  |  |  |  |  |  |  |
|                                                                               |          |         |                   |       |     | 111 120                                                                              | 637.31  | 1272.61 | 1272.56 | 0.05    | 0     | 55                                                 | 0.0022221  | K.VMSEFNPNFR.Q              | Oxidation (M)     | 31.53         |             |                     |                    |                  |                |          |                   |               |       |    |   |  |  |  |  |  |  |  |
|                                                                               |          |         |                   |       |     | 121 128                                                                              | 527.35  | 1052.69 | 1052.46 | 0.23    | 0     | 44                                                 | 0.0024536  | R.QQMENYPK.N                | Oxidation (M)     | 20.43         |             |                     |                    |                  |                |          |                   |               |       |    |   |  |  |  |  |  |  |  |
|                                                                               |          |         |                   |       |     | CD63 HUMAN CD63 antigen OS=Homo sapiens GN=CD63 PE=1 SV=2                            |         |         |         |         |       |                                                    |            |                             |                   |               |             |                     |                    |                  |                |          |                   |               |       |    |   |  |  |  |  |  |  |  |
| OS=Homo sapiens GN=CD63 PE=1 SV=2                                             |          |         |                   |       |     |                                                                                      |         |         |         |         |       |                                                    |            |                             |                   |               |             |                     |                    |                  |                |          |                   |               |       |    |   |  |  |  |  |  |  |  |
| P31146                                                                        | 8%       | 145     | 3                 | 51678 | 6.3 | P31146 C                                                                             | 384 393 | 513.88  | 1025.75 | 1025.61 | 0.13  | 0                                                  | 40         | 0.0056339                   | R.DAGPLLISLK.D    |               | 37.01       | 10                  | 1                  |                  |                |          |                   |               |       |    |   |  |  |  |  |  |  |  |
|                                                                               |          |         |                   |       |     | 417 432                                                                              | 751.87  | 1501.73 | 1501.7  | 0.03    | 0     | 52                                                 | 0.0004253  | R.AAPEASGTPSSDAVSR.L        |                   | 21.54         |             |                     |                    |                  |                |          |                   |               |       |    |   |  |  |  |  |  |  |  |
|                                                                               |          |         |                   |       |     | 440 449                                                                              | 579.35  | 1156.68 | 1156.65 | 0.04    | 0     | 53                                                 | 0.0004041  | K.LQATVQELQK.R              |                   | 29.47         |             |                     |                    |                  |                |          |                   |               |       |    |   |  |  |  |  |  |  |  |
|                                                                               |          |         |                   |       |     | Coronin-1A OS=Homo sapiens GN=CORO1A PE=1 SV=4                                       |         |         |         |         |       |                                                    |            |                             |                   |               |             |                     |                    |                  |                |          |                   |               |       |    |   |  |  |  |  |  |  |  |
| OS=Homo sapiens GN=CORO1A PE=1 SV=4                                           |          |         |                   |       |     |                                                                                      |         |         |         |         |       |                                                    |            |                             |                   |               |             |                     |                    |                  |                |          |                   |               |       |    |   |  |  |  |  |  |  |  |
| P21281                                                                        | 26%      | 591     | 11                | 56807 | 5.6 | P21281 V                                                                             | 30 37   | 437.26  | 872.51  | 872.47  | 0.04  | 0                                                  | 40         | 0.0106554                   | R.EQALAVSR.N      |               | 22.4        | 11                  | 4                  |                  |                |          |                   |               |       |    |   |  |  |  |  |  |  |  |
|                                                                               |          |         |                   |       |     | 83 93                                                                                | 545.8   | 1089.59 | 1089.57 | 0.03    | 0     | 78                                                 | 1.37E-06   | R.SGQVLEVSGSK.A             |                   | 23.68         |             |                     |                    |                  |                |          |                   |               |       |    |   |  |  |  |  |  |  |  |
|                                                                               |          |         |                   |       |     | 94 108                                                                               | 760.95  | 1519.88 | 1519.79 | 0.09    | 0     | 83                                                 | 3.37E-07   | K.AVVQVFEGTSGIDAK.K         |                   | 34.03         |             |                     |                    |                  |                |          |                   |               |       |    |   |  |  |  |  |  |  |  |
|                                                                               |          |         |                   |       |     | 110 120                                                                              | 649.85  | 1297.69 | 1297.6  | 0.09    | 0     | 47                                                 | 0.0014802  | K.TSCEFTGDILR.T             |                   | 34.46         |             |                     |                    |                  |                |          |                   |               |       |    |   |  |  |  |  |  |  |  |
|                                                                               |          |         |                   |       |     | 121 130                                                                              | 560.8   | 1119.59 | 1119.52 | 0.06    | 0     | 55                                                 | 0.0002159  | R.TPVSEDMGLR.V              | Oxidation (M)     | 24.07         |             |                     |                    |                  |                |          |                   |               |       |    |   |  |  |  |  |  |  |  |
|                                                                               |          |         |                   |       |     | 131 141                                                                              | 397.23  | 1188.67 | 1188.63 | 0.05    | 0     | 59                                                 | 9.38E-05   | R.VFNGSGKPIDR.G             |                   | 21.58         |             |                     |                    |                  |                |          |                   |               |       |    |   |  |  |  |  |  |  |  |
|                                                                               |          |         |                   |       |     | 164 185                                                                              | 814.44  | 2440.3  | 2440.16 | 0.14    | 0     | 34                                                 | 0.0220292  | R.YPEEMIGTGSAIDGMNSIAR.G    | 2 Oxidation (M)   | 36.41         |             |                     |                    |                  |                |          |                   |               |       |    |   |  |  |  |  |  |  |  |
|                                                                               |          |         |                   |       |     | 387 400                                                                              | 798.96  | 1595.91 | 1595.9  | 0.01    | 0     | 54                                                 | 0.0002743  | R.QIYPPINVLPSLSR.L          |                   | 37.24         |             |                     |                    |                  |                |          |                   |               |       |    |   |  |  |  |  |  |  |  |
|                                                                               |          |         |                   |       |     | 404 412                                                                              | 469.24  | 936.46  | 936.43  | 0.03    | 0     | 33                                                 | 0.0351706  | K.SAIGEGMTR.K               | Oxidation (M)     | 20.31         |             |                     |                    |                  |                |          |                   |               |       |    |   |  |  |  |  |  |  |  |
|                                                                               |          |         |                   |       |     | 461 471                                                                              | 654.86  | 1307.71 | 1307.63 | 0.09    | 0     | 46                                                 | 0.0016431  | R.NFIAQGPYENR.T             |                   | 32.16         |             |                     |                    |                  |                |          |                   |               |       |    |   |  |  |  |  |  |  |  |
|                                                                               |          |         |                   |       |     | 495 506                                                                              | 719.39  | 1436.76 | 1436.73 | 0.03    | 0     | 64                                                 | 2.36E-05   | R.IPQSTLSEFYPR.D            |                   | 35.37         |             |                     |                    |                  |                |          |                   |               |       |    |   |  |  |  |  |  |  |  |
|                                                                               |          |         |                   |       |     | Vacuolar ATP synthase subunit B, brain isoform OS=Homo sapiens GN=ATP6V1B2 PE=1 SV=3 |         |         |         |         |       |                                                    |            |                             |                   |               |             |                     |                    |                  |                |          |                   |               |       |    |   |  |  |  |  |  |  |  |
|                                                                               |          |         |                   |       |     | OS=Homo sapiens GN=ATP6V1B2 PE=1 SV=3                                                |         |         |         |         |       |                                                    |            |                             |                   |               |             |                     |                    |                  |                |          |                   |               |       |    |   |  |  |  |  |  |  |  |
|                                                                               |          |         |                   |       |     | P25705                                                                               | 15%     | 404     | 7       | 59828   | 9.2   | P25705 A                                           | 46 58      | 720.36                      | 1438.71           | 1438.66       | 0.05        |                     |                    | 0                | 82             | 3.79E-07 | K.TGTAEMSSILEER.I | Oxidation (M) | 31.03 | 11 | 2 |  |  |  |  |  |  |  |
| 59 73                                                                         | 788.46   | 1574.9  | 1574.78           | 0.13  | 0   |                                                                                      |         |         |         |         |       | 58                                                 | 0.0001212  | R.ILGADTSVDLEETGR.V         |                   | 33.72         |             |                     |                    |                  |                |          |                   |               |       |    |   |  |  |  |  |  |  |  |
| 74 83                                                                         | 500.83   | 999.64  | 999.57            | 0.06  | 0   |                                                                                      |         |         |         |         |       | 56                                                 | 0.0002001  | R.VLSIGDGIAR.V              |                   | 33.16         |             |                     |                    |                  |                |          |                   |               |       |    |   |  |  |  |  |  |  |  |
| 134 149                                                                       | 813      | 1623.99 | 1623.88           | 0.11  | 0   |                                                                                      |         |         |         |         |       | 44                                                 | 0.0026972  | R.TGAIVDVPVGEELLR.V         |                   | 36.85         |             |                     |                    |                  |                |          |                   |               |       |    |   |  |  |  |  |  |  |  |
| 150 161                                                                       | 586.34   | 1170.66 | 1170.62           | 0.04  | 0   |                                                                                      |         |         |         |         |       | 72                                                 | 4.40E-06   | R.VVDALGNALDGGK.G           |                   | 32.77         |             |                     |                    |                  |                |          |                   |               |       |    |   |  |  |  |  |  |  |  |
| 195 204                                                                       | 513.82   | 1025.63 | 1025.59           | 0.04  | 0   |                                                                                      |         |         |         |         |       | 53                                                 | 0.0002921  | K.AVDSLVPIGR.G              |                   | 33.77         |             |                     |                    |                  |                |          |                   |               |       |    |   |  |  |  |  |  |  |  |
| 254 261                                                                       | 423.34   | 844.66  | 844.5             | 0.16  | 0   |                                                                                      |         |         |         |         |       | 40                                                 | 0.0058386  | R.STVAQLVK.R                |                   | 28.6          |             |                     |                    |                  |                |          |                   |               |       |    |   |  |  |  |  |  |  |  |
| ATP synthase subunit alpha, mitochondrial OS=Homo sapiens GN=ATP5A1 PE=1 SV=1 |          |         |                   |       |     |                                                                                      |         |         |         |         |       |                                                    |            |                             |                   |               |             |                     |                    |                  |                |          |                   |               |       |    |   |  |  |  |  |  |  |  |
| OS=Homo sapiens GN=ATP5A1 PE=1 SV=1                                           |          |         |                   |       |     |                                                                                      |         |         |         |         |       |                                                    |            |                             |                   |               |             |                     |                    |                  |                |          |                   |               |       |    |   |  |  |  |  |  |  |  |
| Q8IV08                                                                        | 4%       | 98      | 2                 | 55127 | 6   |                                                                                      |         |         |         |         |       | Q8IV08 P                                           | 310 319    | 542.85                      | 1083.69           | 1083.6        | 0.09        | 0                   | 48                 | 0.0011011        | K.ALLNVVDNAR.S |          | 33.59             | 11            | 3     |    |   |  |  |  |  |  |  |  |
|                                                                               |          |         |                   |       |     |                                                                                      |         |         |         |         |       | 397 408                                            | 658.41     | 1314.81                     | 1314.69           | 0.12          | 0           | 50                  | 0.0007309          | K.LFVVPDEAQAAR.I |                | 33.64    |                   |               |       |    |   |  |  |  |  |  |  |  |
|                                                                               |          |         |                   |       |     |                                                                                      |         |         |         |         |       | Phospholipase D3 OS=Homo sapiens GN=PLD3 PE=1 SV=1 |            |                             |                   |               |             |                     |                    |                  |                |          |                   |               |       |    |   |  |  |  |  |  |  |  |
|                                                                               |          |         |                   |       |     |                                                                                      |         |         |         |         |       | OS=Homo sapiens GN=PLD3 PE=1 SV=1                  |            |                             |                   |               |             |                     |                    |                  |                |          |                   |               |       |    |   |  |  |  |  |  |  |  |
|                                                                               |          |         |                   |       |     |                                                                                      |         |         |         |         |       | PLD3 OS=Homo sapiens GN=PLD3 PE=1 SV=1             |            |                             |                   |               |             |                     |                    |                  |                |          |                   |               |       |    |   |  |  |  |  |  |  |  |
| P80723                                                                        | 38%      | 222     | 5                 | 22680 | 4.6 | P80723 B                                                                             | 26 38   | 645.34  | 1288.67 | 1288.58 | 0.1   | 0                                                  | 35         | 0.0235837                   | K.AEGAATEEEGTPK.E |               | 19.66       | 13                  | 1                  |                  |                |          |                   |               |       |    |   |  |  |  |  |  |  |  |
|                                                                               |          |         |                   |       |     | 39 52                                                                                | 714.39  | 1426.77 | 1426.66 | 0.11    | 0     | 40                                                 | 0.0076975  | K.ESEPOAAAPAEAK.E           |                   | 21.01         |             |                     |                    |                  |                |          |                   |               |       |    |   |  |  |  |  |  |  |  |
|                                                                               |          |         |                   |       |     | 98 121                                                                               | 766.76  | 2297.27 | 2297.13 | 0.14    | 1     | 50                                                 | 0.0005412  | K.AEPPKAPQEQAAPGPAAGGEAPK.A |                   | 22.2          |             |                     |                    |                  |                |          |                   |               |       |    |   |  |  |  |  |  |  |  |
|                                                                               |          |         |                   |       |     | 164 184                                                                              | 644.99  | 1931.96 | 1931.87 | 0.09    | 0     | 52                                                 | 0.0003385  | K.SDGAAPASDKPGSSEAAPSSK.E   |                   | 19.21         |             |                     |                    |                  |                |          |                   |               |       |    |   |  |  |  |  |  |  |  |
|                                                                               |          |         |                   |       |     | 185 198                                                                              | 693.91  | 1385.81 | 1385.67 | 0.15    | 0     | 45                                                 | 0.0023931  | K.ETPAAATEAPSSTPK.A         |                   | 20.62         |             |                     |                    |                  |                |          |                   |               |       |    |   |  |  |  |  |  |  |  |
|                                                                               |          |         |                   |       |     | Brain acid soluble protein 1 OS=Homo sapiens GN=BASP1 PE=1 SV=2                      |         |         |         |         |       |                                                    |            |                             |                   |               |             |                     |                    |                  |                |          |                   |               |       |    |   |  |  |  |  |  |  |  |
| OS=Homo sapiens GN=BASP1 PE=1 SV=2                                            |          |         |                   |       |     |                                                                                      |         |         |         |         |       |                                                    |            |                             |                   |               |             |                     |                    |                  |                |          |                   |               |       |    |   |  |  |  |  |  |  |  |
| O75955                                                                        | 26%      | 521     | 9                 | 47554 | 7.1 | O75955 F                                                                             | 19 28   | 493.8   | 985.58  | 985.5   | 0.08  | 0                                                  | 33         | 0.0444982                   | R.SPPVMVAGGR.V    | Oxidation (M) | 21.14       | 13                  | 3                  |                  |                |          |                   |               |       |    |   |  |  |  |  |  |  |  |
|                                                                               |          |         |                   |       |     | 41 51                                                                                | 608.41  | 1214.81 | 1214.72 | 0.09    | 0     | 68                                                 | 1.18E-05   | R.ISLNTLTLNVK.S             |                   | 34.37         |             |                     |                    |                  |                |          |                   |               |       |    |   |  |  |  |  |  |  |  |
|                                                                               |          |         |                   |       |     | 221 230                                                                              | 576.36  | 1150.71 | 1150.56 | 0.15    | 0     | 63                                                 | 3.56E-05   | K.AAYDIEVNTR.R              |                   | 30.66         |             |                     |                    |                  |                |          |                   |               |       |    |   |  |  |  |  |  |  |  |
|                                                                               |          |         |                   |       |     | 254 261                                                                              | 478.81  | 955.61  | 955.55  | 0.07    | 0     | 58                                                 | 0.000105   | R.VQVQVVER.A                |                   | 24.47         |             |                     |                    |                  |                |          |                   |               |       |    |   |  |  |  |  |  |  |  |
|                                                                               |          |         |                   |       |     | 262 274                                                                              | 735.46  | 1468.9  | 1468.76 | 0.14    | 0     | 66                                                 | 1.61E-05   | R.AQQVAVQEIEAR.R            |                   | 28.11         |             |                     |                    |                  |                |          |                   |               |       |    |   |  |  |  |  |  |  |  |
|                                                                               |          |         |                   |       |     | 303 317                                                                              | 810.46  | 1618.91 | 1618.8  | 0.11    | 0     | 47                                                 | 0.001457   | K.SQLIMQAEAEASVR.M          | Oxidation (M)     | 33.67         |             |                     |                    |                  |                |          |                   |               |       |    |   |  |  |  |  |  |  |  |
|                                                                               |          |         |                   |       |     | 361 377                                                                              | 877.52  | 1753.03 | 1752.93 | 0.1     | 0     | 81                                                 | 4.71E-07   | K.LPQVAEEISGPLTSANK.I       |                   | 33.93         |             |                     |                    |                  |                |          |                   |               |       |    |   |  |  |  |  |  |  |  |
|                                                                               |          |         |                   |       |     | 378 392                                                                              | 698.45  | 1394.89 | 1394.71 | 0.19    | 0     | 70                                                 | 7.08E-06   | K.ITLVSSGSGTGMGAARK.V       | Oxidation (M)     | 27.32         |             |                     |                    |                  |                |          |                   |               |       |    |   |  |  |  |  |  |  |  |
|                                                                               |          |         |                   |       |     | Flotillin-1 OS=Homo sapiens GN=FLOT1 PE=1 SV=3                                       |         |         |         |         |       |                                                    |            |                             |                   |               |             |                     |                    |                  |                |          |                   |               |       |    |   |  |  |  |  |  |  |  |
|                                                                               |          |         |                   |       |     | OS=Homo sapiens GN=FLOT1 PE=1 SV=3                                                   |         |         |         |         |       |                                                    |            |                             |                   |               |             |                     |                    |                  |                |          |                   |               |       |    |   |  |  |  |  |  |  |  |

|             |          |       |                   |       |     |                    |                                                 |                 |             |         |       |      |            |           |                     |                 |             |                     |                    |  |
|-------------|----------|-------|-------------------|-------|-----|--------------------|-------------------------------------------------|-----------------|-------------|---------|-------|------|------------|-----------|---------------------|-----------------|-------------|---------------------|--------------------|--|
|             |          |       |                   |       |     | 393                | 403                                             | 608.39          | 1214.77     | 1214.69 | 0.08  | 0    | 40         | 0.0074217 | K.VTGEVLDILTR.L     |                 |             |                     | 36.41              |  |
| accession # | coverage | score | distinct peptides | mass  | pl  | start AA           | end AA                                          | m/z obs         | M obs       | M calc  | delta | miss | pept score | exp val   | peptide             | modifications   | retent time | Strongest gel slice | # gel slices found |  |
| Q14254      | 19%      | 313   | 7                 | 41830 | 5.2 | Q14254 FLOT2_HUMAN | Flotillin-2                                     | OS=Homo sapiens | GN=FLOT2    | PE=1    | SV=1  |      |            |           |                     |                 |             | 13                  | 4                  |  |
|             |          |       |                   |       |     | 121                | 128                                             | 451.78          | 901.54      | 901.5   | 0.04  | 0    | 42         | 0.006652  | K.TQTAVVQR.D        |                 | 19.76       |                     |                    |  |
|             |          |       |                   |       |     | 175                | 184                                             | 562.33          | 1122.65     | 1122.56 | 0.09  | 0    | 31         | 0.0499829 | K.SAFSEEVNIK.T      |                 | 31.36       |                     |                    |  |
|             |          |       |                   |       |     | 248                | 256                                             | 508.31          | 1014.6      | 1014.53 | 0.06  | 0    | 51         | 0.0006819 | R.IQIAIEGK.V        |                 | 21.1        |                     |                    |  |
|             |          |       |                   |       |     | 259                | 269                                             | 600.4           | 1198.78     | 1198.66 | 0.12  | 0    | 46         | 0.0017415 | K.QVLLAQAEAEK.I     |                 | 30.31       |                     |                    |  |
|             |          |       |                   |       |     | 308                | 321                                             | 742.47          | 1482.93     | 1482.85 | 0.08  | 0    | 61         | 5.81E-05  | K.MALVLEALPQIAAK.I  | Oxidation (M)   | 35.58       |                     |                    |  |
|             |          |       |                   |       |     | 322                | 328                                             | 357.26          | 712.51      | 712.45  | 0.06  | 0    | 36         | 0.0144597 | K.IAAPLTK.V         |                 | 22.98       |                     |                    |  |
|             |          |       |                   |       |     | 329                | 341                                             | 687.92          | 1373.83     | 1373.7  | 0.13  | 0    | 47         | 0.0016229 | K.VDEIVLVSGDNSK.V   |                 | 32.45       |                     |                    |  |
| accession # | coverage | score | distinct peptides | mass  | pl  | start AA           | end AA                                          | m/z obs         | M obs       | M calc  | delta | miss | pept score | exp val   | peptide             | modifications   | retent time | Strongest gel slice | # gel slices found |  |
| Q5VTE0      | 13%      | 332   | 7                 | 50495 | 9.2 | Q5VTE0 EF1A3_HUMAN | Putative elongation factor 1-alpha-like 3       | OS=Homo sapiens | GN=EEF1A3   | PE=5    | SV=1  |      |            |           |                     |                 |             | 13                  | 30                 |  |
|             |          |       |                   |       |     | 38                 | 44                                              | 447.78          | 893.54      | 893.49  | 0.06  | 1    | 32         | 0.0458369 | R.TIEKFEK.E         |                 | 20.79       |                     |                    |  |
|             |          |       |                   |       |     | 85                 | 96                                              | 468.95          | 1403.83     | 1403.72 | 0.11  | 0    | 32         | 0.042913  | K.YYVTIIDAPGHR.D    |                 | 31.97       |                     |                    |  |
|             |          |       |                   |       |     | 147                | 154                                             | 435.81          | 869.61      | 869.53  | 0.07  | 0    | 46         | 0.0014456 | K.QLIVGVNK.M        |                 | 29.57       |                     |                    |  |
|             |          |       |                   |       |     | 167                | 172                                             | 390.73          | 779.45      | 779.41  | 0.04  | 0    | 41         | 0.0050596 | R.YEEIVK.E          |                 | 23.94       |                     |                    |  |
|             |          |       |                   |       |     | 248                | 255                                             | 488.33          | 974.64      | 974.54  | 0.1   | 0    | 51         | 0.0007087 | R.LPLQDVIYK.I       |                 | 31.75       |                     |                    |  |
|             |          |       |                   |       |     | 256                | 266                                             | 513.34          | 1024.67     | 1024.6  | 0.07  | 0    | 71         | 5.34E-06  | K.IGGIGITVPVGR.V    |                 | 30.88       |                     |                    |  |
|             |          |       |                   |       |     | 431                | 439                                             | 457.81          | 913.61      | 913.56  | 0.05  | 0    | 62         | 4.30E-05  | R.QTVAVGVK.A        |                 | 29.48       |                     |                    |  |
| accession # | coverage | score | distinct peptides | mass  | pl  | start AA           | end AA                                          | m/z obs         | M obs       | M calc  | delta | miss | pept score | exp val   | peptide             | modifications   | retent time | Strongest gel slice | # gel slices found |  |
| Q9Y6N5      | 6%       | 139   | 2                 | 50214 | 9.2 | Q9Y6N5 SQRD_HUMAN  | Sulfide:quinone oxidoreductase, mitochondrial   | OS=Homo sapiens | GN=SQRD     | PE=1    | SV=1  |      |            |           |                     |                 |             | 13                  | 1                  |  |
|             |          |       |                   |       |     | 66                 | 79                                              | 735.45          | 1468.88     | 1468.75 | 0.13  | 0    | 72         | 4.36E-06  | K.VGAENVAIVPSEK.H   |                 | 30.62       |                     |                    |  |
|             |          |       |                   |       |     | 345                | 358                                             | 672.46          | 1342.9      | 1342.72 | 0.18  | 0    | 67         | 1.33E-05  | K.TAAVAQAQSGILDR.T  |                 | 31.1        |                     |                    |  |
| accession # | coverage | score | distinct peptides | mass  | pl  | start AA           | end AA                                          | m/z obs         | M obs       | M calc  | delta | miss | pept score | exp val   | peptide             | modifications   | retent time | Strongest gel slice | # gel slices found |  |
| O14773      | 9%       | 197   | 4                 | 61723 | 6   | O14773 TPP1_HUMAN  | Tripeptidyl-peptidase 1                         | OS=Homo sapiens | GN=TPP1     | PE=1    | SV=2  |      |            |           |                     |                 |             | 14                  | 4                  |  |
|             |          |       |                   |       |     | 246                | 259                                             | 492.29          | 1473.86     | 1473.75 | 0.11  | 0    | 45         | 0.0021463 | R.LFGGNFAHQASVAR.V  |                 | 30.93       |                     |                    |  |
|             |          |       |                   |       |     | 340                | 346                                             | 425.75          | 849.48      | 849.43  | 0.06  | 0    | 48         | 0.0013137 | R.VNTELMK.A         | Oxidation (M)   | 20.26       |                     |                    |  |
|             |          |       |                   |       |     | 493                | 506                                             | 513.01          | 1536        | 1535.89 | 0.11  | 0    | 34         | 0.0250928 | R.ILSGRPPLGLFLNPR.L |                 | 33.79       |                     |                    |  |
|             |          |       |                   |       |     | 507                | 520                                             | 535.63          | 1603.86     | 1603.81 | 0.04  | 0    | 70         | 6.14E-06  | R.LYQQHGAGLFDVTR.G  |                 | 32.14       |                     |                    |  |
| accession # | coverage | score | distinct peptides | mass  | pl  | start AA           | end AA                                          | m/z obs         | M obs       | M calc  | delta | miss | pept score | exp val   | peptide             | modifications   | retent time | Strongest gel slice | # gel slices found |  |
| P48735      | 7%       | 105   | 3                 | 51333 | 8.9 | P48735 IDHP_HUMAN  | Isocitrate dehydrogenase [NADP], mitochondrial  | OS=Homo sapiens | GN=IDH2     | PE=1    | SV=2  |      |            |           |                     |                 |             | 14                  | 1                  |  |
|             |          |       |                   |       |     | 46                 | 60                                              | 570.29          | 1707.85     | 1707.78 | 0.07  | 0    | 37         | 0.0119735 | K.VAKPVVEMDGEDMTR.I | 2 Oxidation (M) | 20.8        |                     |                    |  |
|             |          |       |                   |       |     | 385                | 393                                             | 522.31          | 1042.6      | 1042.54 | 0.06  | 0    | 35         | 0.0250537 | K.LDGNQDLIR.F       |                 | 30.32       |                     |                    |  |
|             |          |       |                   |       |     | 394                | 400                                             | 441.76          | 881.51      | 881.43  | 0.08  | 0    | 35         | 0.0165167 | R.FAQMLEK.V         | Oxidation (M)   | 22.6        |                     |                    |  |
| accession # | coverage | score | distinct peptides | mass  | pl  | start AA           | end AA                                          | m/z obs         | M obs       | M calc  | delta | miss | pept score | exp val   | peptide             | modifications   | retent time | Strongest gel slice | # gel slices found |  |
| P08670      | 17%      | 417   | 8                 | 53676 | 5.1 | P08670 VIME_HUMAN  | Vimentin                                        | OS=Homo sapiens | GN=VIM      | PE=1    | SV=4  |      |            |           |                     |                 |             | 15                  | 15                 |  |
|             |          |       |                   |       |     | 105                | 113                                             | 558.33          | 1114.65     | 1114.56 | 0.09  | 0    | 34         | 0.028193  | K.VELQELNDR.F       |                 | 30.62       |                     |                    |  |
|             |          |       |                   |       |     | 160                | 168                                             | 530.79          | 1059.56     | 1059.52 | 0.04  | 0    | 60         | 8.17E-05  | R.QVDQLTNDK.A       |                 | 21.39       |                     |                    |  |
|             |          |       |                   |       |     | 197                | 207                                             | 662.38          | 1322.75     | 1322.61 | 0.14  | 0    | 81         | 5.71E-07  | R.EEAENTLQSFR.Q     |                 | 31.4        |                     |                    |  |
|             |          |       |                   |       |     | 208                | 217                                             | 544.79          | 1087.57     | 1087.53 | 0.05  | 0    | 91         | 7.24E-08  | R.QDVNANSLAR.L      |                 | 22.09       |                     |                    |  |
|             |          |       |                   |       |     | 274                | 282                                             | 512.27          | 1022.53     | 1022.5  | 0.02  | 0    | 37         | 0.0131732 | R.QQYESVAAK.N       |                 | 20.61       |                     |                    |  |
|             |          |       |                   |       |     | 295                | 304                                             | 547.32          | 1092.63     | 1092.52 | 0.11  | 0    | 40         | 0.0073819 | K.FADLSEANR.N       |                 | 30.19       |                     |                    |  |
|             |          |       |                   |       |     | 365                | 378                                             | 589.64          | 1765.9      | 1765.8  | 0.1   | 1    | 41         | 0.0046568 | R.LQDEIQNMKEEMAR.H  | 2 Oxidation (M) | 21.31       |                     |                    |  |
|             |          |       |                   |       |     | 403                | 410                                             | 466.8           | 931.58      | 931.46  | 0.12  | 0    | 34         | 0.0310056 | K.LLEGEESR.I        |                 | 21.98       |                     |                    |  |
| accession # | coverage | score | distinct peptides | mass  | pl  | start AA           | end AA                                          | m/z obs         | M obs       | M calc  | delta | miss | pept score | exp val   | peptide             | modifications   | retent time | Strongest gel slice | # gel slices found |  |
| Q9Y295      | 7%       | 94    | 2                 | 40802 | 9   | Q9Y295 DRG1_HUMAN  | Developmentally-regulated GTP-binding protein 1 | OS=Homo sapiens | GN=DRG1     | PE=1    | SV=1  |      |            |           |                     |                 |             | 15                  | 1                  |  |
|             |          |       |                   |       |     | 8                  | 17                                              | 574.82          | 1147.63     | 1147.55 | 0.08  | 0    | 32         | 0.0472738 | K.IAEIEAEMAR.T      | Oxidation (M)   | 26.24       |                     |                    |  |
|             |          |       |                   |       |     | 47                 | 61                                              | 631.32          | 1260.63     | 1260.57 | 0.06  | 0    | 62         | 4.43E-05  | K.GGGGGGPGEGFDVAK.T |                 | 29.41       |                     |                    |  |
| accession # | coverage | score | distinct peptides | mass  | pl  | start AA           | end AA                                          | m/z obs         | M obs       | M calc  | delta | miss | pept score | exp val   | peptide             | modifications   | retent time | Strongest gel slice | # gel slices found |  |
| P61421      | 11%      | 223   | 4                 | 40759 | 4.9 | P61421 VA0D1_HUMAN | Vacuolar proton pump subunit d 1                | OS=Homo sapiens | GN=ATP6V0D1 | PE=1    | SV=1  |      |            |           |                     |                 |             | 17                  | 4                  |  |
|             |          |       |                   |       |     | 188                | 195                                             | 510.82          | 1019.63     | 1019.5  | 0.13  | 0    | 57         | 0.0001702 | K.AYLESFYK.F        |                 | 33.66       |                     |                    |  |
|             |          |       |                   |       |     | 247                | 257                                             | 615.86          | 1229.71     | 1229.68 | 0.03  | 0    | 49         | 0.0010564 | R.LYPEGLAQLAR.A     |                 | 34.53       |                     |                    |  |
|             |          |       |                   |       |     | 258                | 265                                             | 484.26          | 966.51      | 966.43  | 0.08  | 0    | 50         | 0.0006822 | R.ADDYEQVK.N        |                 | 21.46       |                     |                    |  |
|             |          |       |                   |       |     | 276                | 288                                             | 652.89          | 1303.76     | 1303.64 | 0.12  | 0    | 68         | 1.32E-05  | K.LLFEAGSNPGDK.T    |                 | 32.6        |                     |                    |  |
| accession # | coverage | score | distinct peptides | mass  | pl  | start AA           | end AA                                          | m/z obs         | M obs       | M calc  | delta | miss | pept score | exp val   | peptide             | modifications   | retent time | Strongest gel slice | # gel slices found |  |
| P60709      | 6%       | 74    | 2                 | 42052 | 5.3 | P60709 ACTB_HUMAN  | Actin, cytoplasmic 1                            | OS=Homo sapiens | GN=ACTB     | PE=1    | SV=1  |      |            |           |                     |                 |             | 17                  | 9                  |  |
|             |          |       |                   |       |     | 19                 | 28                                              | 488.79          | 975.56      | 975.44  | 0.12  | 0    | 39         | 0.0099304 | K.AGFAGDDAPR.A      |                 | 23.85       |                     |                    |  |
|             |          |       |                   |       |     | 316                | 326                                             | 589.37          | 1176.73     | 1176.61 | 0.12  | 0    | 34         | 0.0285163 | K.EITALAPSTMK.I     | Oxidation (M)   | 29.82       |                     |                    |  |
| accession # | coverage | score | distinct peptides | mass  | pl  | start AA           | end AA                                          | m/z obs         | M obs       | M calc  | delta | miss | pept score | exp val   | peptide             | modifications   | retent time | Strongest gel slice | # gel slices found |  |
| P07355      | 18%      | 290   | 6                 | 38808 | 7.6 | P07355 ANXA2_HUMAN | Annexin A2                                      | OS=Homo sapiens | GN=ANXA2    | PE=1    | SV=2  |      |            |           |                     |                 |             | 18                  | 2                  |  |
|             |          |       |                   |       |     | 38                 | 47                                              | 544.35          | 1086.69     | 1086.59 | 0.1   | 0    | 34         | 0.039459  | R.DALNIETAIK.T      |                 | 34.15       |                     |                    |  |
|             |          |       |                   |       |     | 50                 | 63                                              | 772.1           | 1542.19     | 1541.84 | 0.34  | 0    | 44         | 0.0011889 | K.GVDEVITVINILNTR.S |                 | 38.82       |                     |                    |  |
|             |          |       |                   |       |     | 69                 | 77                                              | 556.35          | 1110.68     | 1110.55 | 0.13  | 0    | 50         | 0.0006635 | R.QDIAFAYQR.R       |                 | 32.54       |                     |                    |  |
|             |          |       |                   |       |     | 105                | 115                                             | 611.82          | 1221.62     | 1221.59 | 0.04  | 0    | 71         | 5.34E-06  | K.TPAQYDASELK.A     |                 | 29.98       |                     |                    |  |
|             |          |       |                   |       |     | 136                | 145                                             | 622.87          | 1243.72     | 1243.62 | 0.11  | 0    | 52         | 0.000548  | R.TNQELQEINR.V      |                 | 26.29       |                     |                    |  |
|             |          |       |                   |       |     | 170                | 176                                             | 381.25          | 760.48      | 760.45  | 0.03  | 0    | 41         | 0.0089043 | K.LMVALAK.G         | Oxidation (M)   | 30.07       |                     |                    |  |
| accession # | coverage | score | distinct peptides | mass  | pl  | start AA           | end AA                                          | m/z obs         | M obs       | M calc  | delta | miss | pept score | exp val   | peptide             | modifications   | retent time | Strongest gel slice | # gel slices found |  |
| P04406      | 11%      | 160   | 3                 | 36201 | 8.6 | P04406 G3P_HUMAN   | Glyceraldehyde-3-phosphate dehydrogenase        | OS=Homo sapiens | GN=GAPDH    | PE=1    | SV=3  |      |            |           |                     |                 |             | 18                  | 1                  |  |

| accession # | coverage | score | distinct peptides | mass  | pl  | start AA           | end AA | m/z obs | M obs   | M calc  | delta | miss | pept score | exp val   | peptide                                                                                | modifications            | retent time | Strongest gel slice | # gel slices found |
|-------------|----------|-------|-------------------|-------|-----|--------------------|--------|---------|---------|---------|-------|------|------------|-----------|----------------------------------------------------------------------------------------|--------------------------|-------------|---------------------|--------------------|
|             |          |       |                   |       |     | 201                | 215    | 706.45  | 1410.89 | 1410.78 | 0.11  | 0    | 56         | 0.0001869 | R.GALQNIIPASTGAAK.A                                                                    |                          |             |                     | 33.45              |
|             |          |       |                   |       |     | 235                | 248    | 765.93  | 1529.85 | 1529.79 | 0.06  | 0    | 54         | 0.0002591 | R.VPTANVSVVDTLTCR.L                                                                    |                          |             |                     | 33.89              |
|             |          |       |                   |       |     | 264                | 271    | 415.25  | 828.49  | 828.43  | 0.06  | 0    | 50         | 0.0009727 | K.QASEGPLK.G                                                                           |                          |             |                     | 20.95              |
| P50897      | 26%      | 265   | 5                 | 34627 | 6.1 | P50897 PPT1_HUMAN  |        |         |         |         |       |      |            |           | Palmitoyl-protein thioesterase 1 OS=Homo sapiens GN=PPT1 PE=1 SV=1                     |                          |             | 19                  | 8                  |
|             |          |       |                   |       |     | 62                 | 74     | 701.5   | 1400.99 | 1400.83 | 0.16  | 0    | 85         | 1.96E-07  | K.IPGIYVLSLEIGK.T                                                                      |                          |             |                     | 39.17              |
|             |          |       |                   |       |     | 105                | 122    | 1009.57 | 2017.13 | 2016.95 | 0.18  | 0    | 107        | 1.23E-09  | K.LQQQYGNAMGFSGQGQFLR.A                                                                | Oxidation (M)            |             |                     | 34.23              |
|             |          |       |                   |       |     | 128                | 151    | 859.95  | 2576.83 | 2576.3  | 0.53  | 0    | 34         | 0.036564  | R.CPSPPMINLISVGGQHGVFLGPR                                                              | Oxidation (M)            |             |                     | 36.74              |
|             |          |       |                   |       |     | 166                | 174    | 462.79  | 923.56  | 923.47  | 0.09  | 0    | 67         | 1.13E-05  | K.TLNAVAYSK.V                                                                          |                          |             |                     | 22.58              |
|             |          |       |                   |       |     | 254                | 268    | 897.57  | 1793.12 | 1792.88 | 0.24  | 0    | 72         | 4.12E-06  | K.ETIPLQETSPLYTQDR.L                                                                   |                          |             |                     | 34.36              |
| P40926      | 19%      | 129   | 5                 | 35965 | 8.9 | P40926 MDHM_HUMAN  |        |         |         |         |       |      |            |           | Malate dehydrogenase, mitochondrial OS=Homo sapiens GN=MDH2 PE=1 SV=2                  |                          |             | 19                  | 2                  |
|             |          |       |                   |       |     | 27                 | 45     | 897.14  | 1792.27 | 1792.08 | 0.19  | 0    | 53         | 0.0002674 | K.VAVLGAASGGIGQPLSLLK.N                                                                |                          |             |                     | 39.55              |
|             |          |       |                   |       |     | 177                | 185    | 496.84  | 991.66  | 991.53  | 0.13  | 0    | 37         | 0.0163372 | R.ANTFVAVELK.G                                                                         |                          |             |                     | 33.32              |
|             |          |       |                   |       |     | 230                | 239    | 537.34  | 1072.66 | 1072.58 | 0.08  | 0    | 59         | 0.0001058 | R.IQEAGTEVVKA.A                                                                        |                          |             |                     | 22.92              |
|             |          |       |                   |       |     | 242                | 257    | 735.94  | 1469.87 | 1469.69 | 0.18  | 0    | 34         | 0.0297627 | K.AGAGSATLSMAYAGAR.F                                                                   | Oxidation (M)            |             |                     | 30.76              |
|             |          |       |                   |       |     | 315                | 324    | 566.85  | 1131.68 | 1131.58 | 0.1   | 0    | 50         | 0.0007044 | K.MISDAIPELK.A                                                                         | Oxidation (M)            |             |                     | 34.06              |
| Q99623      | 10%      | 87    | 3                 | 33276 | 9.8 | Q99623 PHB2_HUMAN  |        |         |         |         |       |      |            |           | Prohibitin-2 OS=Homo sapiens GN=PHB2 PE=1 SV=2                                         |                          |             | 19                  | 1                  |
|             |          |       |                   |       |     | 124                | 131    | 497.86  | 993.71  | 993.48  | 0.23  | 0    | 36         | 0.0156663 | R.LGLDYEER.V                                                                           |                          |             |                     | 32.63              |
|             |          |       |                   |       |     | 148                | 157    | 589.38  | 1176.74 | 1176.63 | 0.11  | 0    | 40         | 0.0082704 | K.FNASQLITQR.A                                                                         |                          |             |                     | 34.1               |
|             |          |       |                   |       |     | 225                | 236    | 608.37  | 1214.72 | 1214.61 | 0.11  | 0    | 66         | 2.09E-05  | K.IVQAEAEAAK.M                                                                         |                          |             |                     | 21.91              |
| Q9UBR2      | 7%       | 73    | 2                 | 34530 | 6.7 | Q9UBR2 CATZ_HUMAN  |        |         |         |         |       |      |            |           | Cathepsin Z OS=Homo sapiens GN=CTSZ PE=1 SV=1                                          |                          |             | 19                  | 2                  |
|             |          |       |                   |       |     | 70                 | 81     | 654.87  | 1307.73 | 1307.65 | 0.08  | 0    | 43         | 0.0035373 | R.NVDGVNYASITR.N                                                                       |                          |             |                     | 32.45              |
|             |          |       |                   |       |     | 190                | 199    | 505.79  | 1009.57 | 1009.48 | 0.09  | 0    | 48         | 0.0010338 | R.VGDYGLSLGR.E                                                                         |                          |             |                     | 28.58              |
| Q9HAV0      | 7%       | 62    | 2                 | 38284 | 5.6 | Q9HAV0 GGB4_HUMAN  |        |         |         |         |       |      |            |           | Guanine nucleotide-binding protein subunit beta-4 OS=Homo sapiens GN=GNB4 PE=1 SV=3    |                          |             | 19                  | 1                  |
|             |          |       |                   |       |     | 2                  | 15     | 885.99  | 1769.96 | 1769.89 | 0.07  | 1    | 41         | 0.0049993 | M.SELEQLRQEAQLR.N                                                                      | Acetyl (Protein N-term)  |             |                     | 37.58              |
|             |          |       |                   |       |     | 69                 | 78     | 509.33  | 1016.65 | 1016.55 | 0.1   | 0    | 46         | 0.002139  | R.LLVASQDGK.L                                                                          |                          |             |                     | 25.55              |
| P36543      | 20%      | 215   | 5                 | 26186 | 7.7 | P36543 VATE1_HUMAN |        |         |         |         |       |      |            |           | Vacuolar proton pump subunit E 1 OS=Homo sapiens GN=ATP6V1E1 PE=1 SV=1                 |                          |             | 20                  | 4                  |
|             |          |       |                   |       |     | 2                  | 10     | 494.81  | 987.61  | 987.49  | 0.12  | 0    | 33         | 0.0468906 | M.ALSDDADVQK.Q                                                                         | Acetyl (Protein N-term)  |             |                     | 31.51              |
|             |          |       |                   |       |     | 34                 | 42     | 554.82  | 1107.63 | 1107.51 | 0.12  | 0    | 46         | 0.0015812 | K.AEEEFNIEK.G                                                                          |                          |             |                     | 31.69              |
|             |          |       |                   |       |     | 70                 | 80     | 669.36  | 1336.7  | 1336.62 | 0.08  | 0    | 63         | 3.52E-05  | K.IQMNSLMNQAR.L                                                                        | 2 Oxidation (M)          |             |                     | 21.58              |
|             |          |       |                   |       |     | 138                | 145    | 487.86  | 973.7   | 973.56  | 0.14  | 1    | 38         | 0.0122252 | R.KQDFFLVK.A                                                                           |                          |             |                     | 30.78              |
|             |          |       |                   |       |     | 192                | 199    | 453.28  | 904.55  | 904.46  | 0.09  | 0    | 35         | 0.0261489 | K.VSNTLESR.L                                                                           |                          |             |                     | 21.14              |
| Q16698      | 8%       | 118   | 2                 | 36330 | 9.3 | Q16698 DECR_HUMAN  |        |         |         |         |       |      |            |           | 2,4-dienoyl-CoA reductase, mitochondrial OS=Homo sapiens GN=DECR1 PE=1 SV=1            |                          |             | 20                  | 1                  |
|             |          |       |                   |       |     | 61                 | 73     | 589.38  | 1176.74 | 1176.65 | 0.09  | 0    | 40         | 0.0081194 | K.VAFITGGGTGLGK.G                                                                      |                          |             |                     | 33.73              |
|             |          |       |                   |       |     | 98                 | 110    | 667.89  | 1333.76 | 1333.65 | 0.11  | 0    | 79         | 9.88E-07  | K.ATAEQISSQTGNK.V                                                                      |                          |             |                     | 21.1               |
| P07339      | 30%      | 621   | 11 (12)           | 45037 | 6.1 | P07339 CATD_HUMAN  |        |         |         |         |       |      |            |           | Cathepsin D OS=Homo sapiens GN=CTSD PE=1 SV=1                                          |                          |             | 21                  | 18                 |
|             |          |       |                   |       |     | 177                | 184    | 440.27  | 878.53  | 878.45  | 0.09  | 0    | 60         | 7.48E-05  | R.QVFGEATK.Q                                                                           |                          |             |                     | 23.94              |
|             |          |       |                   |       |     | 177                | 194    | 945.2   | 1888.39 | 1888.01 | 0.38  | 1    | 52         | 0.0003127 | R.QVFGEATKQPGITFIAAK.F                                                                 | Gln->pyro-Glu (N-term Q) |             |                     | 36.79              |
|             |          |       |                   |       |     | 177                | 194    | 636.1   | 1905.28 | 1905.04 | 0.25  | 1    | 66         | 1.48E-05  | R.QVFGEATKQPGITFIAAK.F                                                                 | Gln->pyro-Glu (N-term Q) |             |                     | 34.15              |
|             |          |       |                   |       |     | 185                | 194    | 514.87  | 1027.73 | 1027.57 | 0.16  | 0    | 63         | 3.15E-05  | K.QPGITFIAAK.F                                                                         |                          |             |                     | 36.84              |
|             |          |       |                   |       |     | 195                | 205    | 628.37  | 1254.73 | 1254.61 | 0.13  | 0    | 58         | 0.0001108 | K.FDGLGMAYPR.I                                                                         | Oxidation (M)            |             |                     | 35.28              |
|             |          |       |                   |       |     | 206                | 222    | 659.08  | 1974.23 | 1974.02 | 0.2   | 0    | 61         | 4.75E-05  | R.ISVNNVLPVFDNLMQK.L                                                                   | Oxidation (M)            |             |                     | 38.4               |
|             |          |       |                   |       |     | 223                | 235    | 801.49  | 1600.96 | 1600.82 | 0.14  | 0    | 79         | 8.46E-07  | K.LVLDQNIFSYLSR.D                                                                      |                          |             |                     | 39.67              |
|             |          |       |                   |       |     | 236                | 253    | 902.52  | 1803.03 | 1802.8  | 0.23  | 0    | 55         | 0.0002068 | R.DPDAQGGELMLGGTDSK.Y                                                                  | Oxidation (M)            |             |                     | 32.67              |
|             |          |       |                   |       |     | 314                | 331    | 1003.15 | 2004.29 | 2004.01 | 0.28  | 0    | 41         | 0.0048791 | K.AIGAVPLIQGEYMPICEK.V                                                                 | Oxidation (M)            |             |                     | 36.36              |
|             |          |       |                   |       |     | 332                | 341    | 521.87  | 1041.73 | 1041.64 | 0.09  | 0    | 35         | 0.02339   | K.VSTLPAITLK.L                                                                         |                          |             |                     | 34.49              |
|             |          |       |                   |       |     | 349                | 357    | 533.32  | 1064.63 | 1064.54 | 0.09  | 0    | 52         | 0.0004286 | K.LSPEDYTLK.V                                                                          |                          |             |                     | 33.06              |
|             |          |       |                   |       |     | 404                | 411    | 410.74  | 819.47  | 819.42  | 0.05  | 0    | 51         | 0.0006244 | R.VGFAEAAR.L                                                                           |                          |             |                     | 28.51              |
| P08579      | 8%       | 82    | 2                 | 25470 | 9.7 | P08579 RUB2_HUMAN  |        |         |         |         |       |      |            |           | U2 small nuclear ribonucleoprotein B' OS=Homo sapiens GN=SNRPB2 PE=1 SV=1              |                          |             | 23                  | 1                  |
|             |          |       |                   |       |     | 86                 | 93     | 439.75  | 877.48  | 877.44  | 0.04  | 0    | 33         | 0.0416277 | K.TDSDIISK.M                                                                           |                          |             |                     | 18.14              |
|             |          |       |                   |       |     | 112                | 122    | 597.32  | 1192.63 | 1192.59 | 0.03  | 0    | 49         | 0.0008116 | K.TVEQTATTTNK.K                                                                        |                          |             |                     | 15.84              |
| P51572      | 8%       | 69    | 2                 | 28031 | 8.4 | P51572 BAP31_HUMAN |        |         |         |         |       |      |            |           | B-cell receptor-associated protein 31 OS=Homo sapiens GN=BCAP31 PE=1 SV=3              |                          |             | 23                  | 1                  |
|             |          |       |                   |       |     | 149                | 159    | 481.27  | 1440.78 | 1440.69 | 0.09  | 2    | 33         | 0.0351196 | K.KYMEENDQLKK.G                                                                        | Oxidation (M)            |             |                     | 15.7               |
|             |          |       |                   |       |     | 205                | 213    | 524.28  | 1046.54 | 1046.52 | 0.02  | 0    | 36         | 0.0185186 | K.AENQVLAMR.K                                                                          | Oxidation (M)            |             |                     | 18.23              |
| P21796      | 11%      | 169   | 3                 | 30868 | 8.6 | P21796 VDAC1_HUMAN |        |         |         |         |       |      |            |           | Voltage-dependent anion-selective channel protein 1 OS=Homo sapiens GN=VDAC1 PE=1 SV=2 |                          |             | 24                  | 2                  |
|             |          |       |                   |       |     | 54                 | 61     | 417.75  | 833.48  | 833.45  | 0.03  | 0    | 35         | 0.0289748 | K.VTGSLETK.Y                                                                           |                          |             |                     | 17.13              |
|             |          |       |                   |       |     | 97                 | 109    | 700.87  | 1399.72 | 1399.66 | 0.06  | 0    | 45         | 0.0024016 | K.LTFDSSFPNTGK.K                                                                       |                          |             |                     | 26.9               |
|             |          |       |                   |       |     | 164                | 174    | 607.34  | 1212.66 | 1212.61 | 0.05  | 0    | 90         | 7.44E-08  | R.VTQSNFVGYK.T                                                                         |                          |             |                     | 25.21              |

| accession # | coverage | score | distinct peptides | mass  | pl  | start AA           | end AA                                     | m/z obs | M obs | M calc | delta   | miss    | pept score | exp val | peptide | modifications                  | retent time                               | Strongest gel slice | # gel slices found |   |
|-------------|----------|-------|-------------------|-------|-----|--------------------|--------------------------------------------|---------|-------|--------|---------|---------|------------|---------|---------|--------------------------------|-------------------------------------------|---------------------|--------------------|---|
| Q9UL25      | 11%      | 148   | 2                 | 24731 | 8.1 | Q9UL25 RAB21_HUMAN | Ras-related protein Rab-21                 | 2       | 16    | 557.3  | 1112.59 | 1112.53 | 0.06       | 0       | 78      | 1.16E-06 M.AAAGGGGGGAAAAGR.A   | Acetyl (Protein N-term)<br>Oxidation (M)  | 17.7<br>19.27       | 24                 | 3 |
|             |          |       |                   |       |     |                    |                                            | 180     | 189   | 604.31 | 1206.6  | 1206.56 | 0.05       | 0       | 70      | 7.89E-06 R.MIETAQVDER.A        |                                           |                     |                    |   |
|             |          |       |                   |       |     |                    |                                            |         |       |        |         |         |            |         |         |                                |                                           |                     |                    |   |
| P25774      | 8%       | 101   | 2                 | 38099 | 8.6 | P25774 CATS_HUMAN  | Cathepsin S                                | 159     | 174   | 882.45 | 1762.89 | 1762.88 | 0.01       | 0       | 56      | 0.0001629 K.LVLSLQAQLVDCSTEK.Y | 27.11<br>22.25                            | 24                  | 1                  |   |
|             |          |       |                   |       |     |                    |                                            | 246     | 255   | 478.79 | 955.56  | 955.51  | 0.05       | 0       | 46      | 0.0017483 K.GPVSQVGDAR.H       |                                           |                     |                    |   |
|             |          |       |                   |       |     |                    |                                            |         |       |        |         |         |            |         |         |                                |                                           |                     |                    |   |
| P51148      | 29%      | 312   | 5                 | 23696 | 8.6 | P51148 RAB5C_HUMAN | Ras-related protein Rab-5C                 | 24      | 34    | 543.35 | 1084.68 | 1084.65 | 0.03       | 0       | 63      | 4.26E-05 K.LVLLGESAVGK.S       | 27.13<br>27.78<br>28.78<br>16.43<br>23.97 | 25                  | 5                  |   |
|             |          |       |                   |       |     |                    |                                            | 122     | 135   | 698.43 | 1394.84 | 1394.79 | 0.05       | 0       | 74      | 2.48E-06 R.QASPNVIALAGNKA      |                                           |                     |                    |   |
|             |          |       |                   |       |     |                    |                                            | 167     | 180   | 792.91 | 1583.81 | 1583.77 | 0.04       | 0       | 52      | 0.0003916 K.TAMNVNEIFMAIAK.K   |                                           |                     |                    |   |
|             |          |       |                   |       |     |                    |                                            | 185     | 196   | 606.33 | 1210.65 | 1210.57 | 0.08       | 0       | 56      | 0.0001901 K.NEPQATGAPGR.N      |                                           |                     |                    |   |
|             |          |       |                   |       |     |                    |                                            | 199     | 210   | 650.33 | 1298.64 | 1298.62 | 0.02       | 0       | 68      | 1.21E-05 R.GVDLQENNPASR.S      |                                           |                     |                    |   |
| P05090      | 23%      | 211   | 4                 | 21547 | 5.1 | P05090 APOD_HUMAN  | Apolipoprotein D                           | 52      | 60    | 517.78 | 1033.54 | 1033.52 | 0.02       | 0       | 33      | 0.0414603 K.IPTTFENGRC         | 24.66<br>25.96<br>26.13<br>18.33          | 25                  | 3                  |   |
|             |          |       |                   |       |     |                    |                                            | 152     | 164   | 712.4  | 1422.79 | 1422.74 | 0.05       | 0       | 51      | 0.0005225 R.NPNLPPETVDSLK.N    |                                           |                     |                    |   |
|             |          |       |                   |       |     |                    |                                            | 165     | 175   | 615.86 | 1229.71 | 1229.66 | 0.05       | 0       | 49      | 0.0010158 K.NILTSNNDIVK.K      |                                           |                     |                    |   |
|             |          |       |                   |       |     |                    |                                            | 177     | 187   | 654.83 | 1307.64 | 1307.58 | 0.06       | 0       | 79      | 9.24E-07 K.MVTVDQVNCPK.L       |                                           |                     |                    |   |
|             |          |       |                   |       |     |                    |                                            |         |       |        |         |         |            |         |         |                                |                                           |                     |                    |   |
| P61006      | 19%      | 209   | 4                 | 23824 | 9.2 | P61006 RAB8A_HUMAN | Ras-related protein Rab-8A                 | 11      | 21    | 536.36 | 1070.7  | 1070.63 | 0.07       | 0       | 43      | 0.0040065 K.LLLIGDSGVGK.T      | 27.39<br>30.01<br>16.27<br>16.73          | 25                  | 5                  |   |
|             |          |       |                   |       |     |                    |                                            | 154     | 167   | 790.44 | 1578.86 | 1578.82 | 0.04       | 0       | 64      | 2.82E-05 K.ANNVNEAFFTLAR.D     |                                           |                     |                    |   |
|             |          |       |                   |       |     |                    |                                            | 176     | 190   | 514.95 | 1541.83 | 1541.78 | 0.05       | 1       | 43      | 0.0036183 K.KLEGNSPQGSNQGK.V   |                                           |                     |                    |   |
|             |          |       |                   |       |     |                    |                                            | 177     | 190   | 707.89 | 1413.77 | 1413.68 | 0.09       | 0       | 60      | 6.92E-05 K.LEGNPQGSNQGK.V      |                                           |                     |                    |   |
|             |          |       |                   |       |     |                    |                                            |         |       |        |         |         |            |         |         |                                |                                           |                     |                    |   |
| P20339      | 17%      | 167   | 3                 | 23872 | 8.3 | P20339 RAB5A_HUMAN | Ras-related protein Rab-5A                 | 23      | 33    | 543.35 | 1084.68 | 1084.65 | 0.03       | 0       | 63      | 4.26E-05 K.LVLLGESAVGK.S       | 27.13<br>28.78<br>16.33                   | 25                  | 1                  |   |
|             |          |       |                   |       |     |                    |                                            | 166     | 179   | 792.91 | 1583.81 | 1583.77 | 0.04       | 0       | 60      | 6.38E-05 K.TSMNVNEIFMAIAK.K    |                                           |                     |                    |   |
|             |          |       |                   |       |     |                    |                                            | 184     | 195   | 627.82 | 1253.63 | 1253.57 | 0.05       | 0       | 44      | 0.0027668 K.NEPQNPANSAR.G      |                                           |                     |                    |   |
|             |          |       |                   |       |     |                    |                                            |         |       |        |         |         |            |         |         |                                |                                           |                     |                    |   |
| P51153      | 18%      | 146   | 3                 | 22988 | 9.3 | P51153 RAB13_HUMAN | Ras-related protein Rab-13                 | 11      | 21    | 536.36 | 1070.71 | 1070.63 | 0.07       | 0       | 44      | 0.0027903 K.LLLIGDSGVGK.T      | 27.35<br>16.84<br>27.22                   | 26                  | 7                  |   |
|             |          |       |                   |       |     |                    |                                            | 105     | 116   | 420.9  | 1259.69 | 1259.65 | 0.04       | 1       | 43      | 0.0041651 K.SIKENASAGVER.L     |                                           |                     |                    |   |
|             |          |       |                   |       |     |                    |                                            | 154     | 167   | 765.39 | 1528.77 | 1528.68 | 0.09       | 0       | 59      | 9.58E-05 K.SSMNVDEAFSSLAR.D    |                                           |                     |                    |   |
|             |          |       |                   |       |     |                    |                                            |         |       |        |         |         |            |         |         |                                |                                           |                     |                    |   |
| P51149      | 17%      | 153   | 3                 | 23760 | 6.4 | P51149 RAB7A_HUMAN | Ras-related protein Rab-7a                 | 11      | 21    | 529.33 | 1056.65 | 1056.62 | 0.03       | 0       | 44      | 0.0032475 K.VIILGDSGVGK.T      | 26.27<br>26.62<br>29.12                   | 26                  | 3                  |   |
|             |          |       |                   |       |     |                    |                                            | 147     | 157   | 642.34 | 1282.67 | 1282.62 | 0.05       | 0       | 37      | 0.0145849 K.NNIPYFETSAK.E      |                                           |                     |                    |   |
|             |          |       |                   |       |     |                    |                                            | 158     | 171   | 795.45 | 1588.89 | 1588.82 | 0.07       | 0       | 41      | 0.0048258 K.EAINVEAQFQTIAR.N   |                                           |                     |                    |   |
|             |          |       |                   |       |     |                    |                                            |         |       |        |         |         |            |         |         |                                |                                           |                     |                    |   |
| P04179      | 9%       | 97    | 2                 | 24878 | 8.3 | P04179 SODM_HUMAN  | Superoxide dismutase [Mn], mitochondrial   | 69      | 75    | 411.74 | 821.47  | 821.43  | 0.04       | 0       | 34      | 0.0301767 K.YQELAK.G           | 17.91<br>26.92                            | 26                  | 1                  |   |
|             |          |       |                   |       |     |                    |                                            | 76      | 89    | 712.92 | 1423.82 | 1423.8  | 0.02       | 0       | 64      | 2.83E-05 K.GDVTAQIALQPALK.F    |                                           |                     |                    |   |
|             |          |       |                   |       |     |                    |                                            |         |       |        |         |         |            |         |         |                                |                                           |                     |                    |   |
| P15153      | 11%      | 109   | 2                 | 21814 | 7.5 | P15153 RAC2_HUMAN  | Ras-related C3 botulinum toxin substrate 2 | 6       | 16    | 530.8  | 1059.59 | 1059.54 | 0.05       | 0       | 46      | 0.0022031 K.CVYVGDGAVGK.T      | 21.43<br>25.39                            | 27                  | 2                  |   |
|             |          |       |                   |       |     |                    |                                            | 154     | 163   | 620.83 | 1239.64 | 1239.59 | 0.05       | 0       | 63      | 3.66E-05 K.YLECSALTQR.G        |                                           |                     |                    |   |
|             |          |       |                   |       |     |                    |                                            |         |       |        |         |         |            |         |         |                                |                                           |                     |                    |   |
| P63000      | 17%      | 116   | 3                 | 21835 | 8.8 | P63000 RAC1_HUMAN  | Ras-related C3 botulinum toxin substrate 1 | 6       | 16    | 530.8  | 1059.58 | 1059.54 | 0.04       | 0       | 41      | 0.006547 K.CVYVGDGAVGK.T       | 19.77<br>25.47<br>25.04                   | 29                  | 2                  |   |
|             |          |       |                   |       |     |                    |                                            | 134     | 147   | 760.44 | 1518.86 | 1518.81 | 0.05       | 0       | 35      | 0.0202092 K.LTPITYPQGLAMAK.E   |                                           |                     |                    |   |
|             |          |       |                   |       |     |                    |                                            | 167     | 174   | 475.78 | 949.54  | 949.49  | 0.05       | 0       | 39      | 0.0090103 K.TVFDEAIR.A         |                                           |                     |                    |   |
|             |          |       |                   |       |     |                    |                                            |         |       |        |         |         |            |         |         |                                |                                           |                     |                    |   |
| P23284      | 13%      | 109   | 2                 | 22785 | 9.3 | P23284 PPIB_HUMAN  | Peptidyl-prolyl cis-trans isomerase B      | 64      | 76    | 682.88 | 1363.74 | 1363.7  | 0.05       | 0       | 67      | 1.47E-05 K.TVDNFVALATGEK.G     | 26.78<br>26.56                            | 29                  | 1                  |   |
|             |          |       |                   |       |     |                    |                                            | 138     | 150   | 729.41 | 1456.8  | 1456.72 | 0.08       | 0       | 44      | 0.0030001 K.DTNGSQFITTVK.T     |                                           |                     |                    |   |
|             |          |       |                   |       |     |                    |                                            |         |       |        |         |         |            |         |         |                                |                                           |                     |                    |   |
| Q92930      | 12%      | 138   | 2                 | 23740 | 9.2 | Q92930 RAB8B_HUMAN | Ras-related protein Rab-8B                 | 11      | 21    | 536.35 | 1070.69 | 1070.63 | 0.05       | 0       | 48      | 0.0012521 K.LLLIGDSGVGK.T      | 26.17<br>15.57                            | 29                  | 6                  |   |
|             |          |       |                   |       |     |                    |                                            | 177     | 190   | 660.8  | 1319.59 | 1319.58 | 0.01       | 0       | 90      | 6.76E-08 K.MMDSNSAGAGGPVK.I    |                                           |                     |                    |   |
|             |          |       |                   |       |     |                    |                                            |         |       |        |         |         |            |         |         |                                |                                           |                     |                    |   |
| P60953      | 12%      | 96    | 2                 | 21696 | 5.8 | P60953 CDC42_HUMAN | Cell division control protein 42 homolog   |         |       |        |         |         |            |         |         |                                |                                           | 29                  | 2                  |   |

| accession # | coverage | score | distinct peptides | mass   | pl  | start AA | end AA      | m/z obs                                                           | M obs           | M calc      | delta | miss | pept score | exp val   | peptide               | modifications                          | retent time | Strongest gel slice | # gel slices found |
|-------------|----------|-------|-------------------|--------|-----|----------|-------------|-------------------------------------------------------------------|-----------------|-------------|-------|------|------------|-----------|-----------------------|----------------------------------------|-------------|---------------------|--------------------|
|             |          |       |                   |        |     | 6        | 16          | 530.8                                                             | 1059.58         | 1059.54     | 0.04  | 0    | 41         | 0.006547  | K.CVVVGDGAVGK.T       |                                        | 19.77       |                     |                    |
|             |          |       |                   |        |     | 134      | 144         | 414.58                                                            | 1240.72         | 1240.67     | 0.05  | 0    | 54         | 0.0002541 | K.QKPIPTETAEK.L       |                                        | 15.96       |                     |                    |
| P62820      | 11%      | 92    | 2                 | 22891  | 5.9 | P62820   | RAB1A_HUMAN | Ras-related protein Rab-1A                                        | OS=Homo sapiens | GN=RAB1A    | PE=1  | SV=3 |            |           |                       |                                        | 26.17       | 29                  | 1                  |
|             |          |       |                   |        |     | 14       | 24          | 536.35                                                            | 1070.69         | 1070.63     | 0.05  | 0    | 48         | 0.0012521 | K.LLLIGDSGVGK.S       |                                        | 15.24       |                     |                    |
|             |          |       |                   |        |     | 176      | 187         | 531.78                                                            | 1061.54         | 1061.48     | 0.06  | 0    | 44         | 0.0032673 | R.MGPGATAGGAEK.S      | Oxidation (M)                          |             |                     |                    |
| P53990      | 7%       | 115   | 3                 | 39897  | 5.2 | P53990   | K174_HUMAN  | Uncharacterized protein KIAA0174                                  | OS=Homo sapiens | GN=KIAA0174 | PE=1  | SV=1 |            |           |                       |                                        | 24.73       | 29                  | 3                  |
|             |          |       |                   |        |     | 83       | 90          | 470.28                                                            | 938.55          | 938.49      | 0.06  | 0    | 31         | 0.0435121 | R.FGLIQSMK.E          | Oxidation (M)                          | 23.34       |                     |                    |
|             |          |       |                   |        |     | 110      | 118         | 508.81                                                            | 1015.61         | 1015.55     | 0.05  | 0    | 38         | 0.0140626 | R.LQSEVAELK.I         |                                        | 17          |                     |                    |
|             |          |       |                   |        |     | 138      | 147         | 559.31                                                            | 1116.6          | 1116.55     | 0.05  | 0    | 45         | 0.0025742 | R.TNQIGTVNDR.L        |                                        |             |                     |                    |
| P10253      | 3%       | 160   | 2                 | 106126 | 5.6 | P10253   | LYAG_HUMAN  | Lysosomal alpha-glucosidase                                       | OS=Homo sapiens | GN=GAA      | PE=1  | SV=2 |            |           |                       |                                        | 26.4        | 31                  | 5                  |
|             |          |       |                   |        |     | 838      | 849         | 643.88                                                            | 1285.75         | 1285.71     | 0.05  | 0    | 57         | 0.0001477 | R.QQPMALAVLT.K        | Oxidation (M)                          | 24.4        |                     |                    |
|             |          |       |                   |        |     | 892      | 903         | 615.87                                                            | 1229.73         | 1229.66     | 0.07  | 0    | 103        | 3.68E-09  | R.VTSEGAGLQLQK.V      |                                        |             |                     |                    |
| P82979      | 14%      | 112   | 3                 | 23713  | 6.1 | P82979   | HCC1_HUMAN  | Nuclear protein Hcc-1                                             | OS=Homo sapiens | GN=HCC1     | PE=1  | SV=3 |            |           |                       |                                        | 25.78       | 32                  | 2                  |
|             |          |       |                   |        |     | 110      | 119         | 560.33                                                            | 1118.65         | 1118.6      | 0.05  | 0    | 35         | 0.0237098 | R.FNVVPSLESK.K        |                                        | 24.52       |                     |                    |
|             |          |       |                   |        |     | 127      | 135         | 468.28                                                            | 934.55          | 934.51      | 0.04  | 0    | 36         | 0.0215869 | R.FGISVPTK.G          |                                        | 25.82       |                     |                    |
|             |          |       |                   |        |     | 157      | 166         | 540.31                                                            | 1078.61         | 1078.58     | 0.03  | 0    | 42         | 0.0044691 | R.FGLNVSSISR.K        |                                        |             |                     |                    |
| O75348      | 21%      | 178   | 3                 | 13863  | 8.9 | O75348   | VATG1_HUMAN | Vacuolar proton pump subunit G 1                                  | OS=Homo sapiens | GN=ATP6V1G1 | PE=1  | SV=3 |            |           |                       |                                        | 28.74       | 33                  | 2                  |
|             |          |       |                   |        |     | 2        | 16          | 835.99                                                            | 1669.96         | 1669.86     | 0.1   | 0    | 55         | 0.0001901 | M.ASQSQGIQQLLQAEK.R   | Acetyl (Protein N-term)                | 27.57       |                     |                    |
|             |          |       |                   |        |     | 2        | 17          | 914.04                                                            | 1826.06         | 1825.96     | 0.09  | 1    | 89         | 7.72E-08  | M.ASQSQGIQQLLQAEK.R.A | Acetyl (Protein N-term)                | 28.43       |                     |                    |
|             |          |       |                   |        |     | 81       | 89          | 594.84                                                            | 1187.67         | 1187.6      | 0.07  | 0    | 34         | 0.0319743 | K.MTILQTYFR.Q         | Oxidation (M)                          |             |                     |                    |
| Q13510      | 5%       | 123   | 2                 | 45077  | 7.5 | Q13510   | ASAH1_HUMAN | Acid ceramidase                                                   | OS=Homo sapiens | GN=ASAH1    | PE=1  | SV=4 |            |           |                       |                                        | 25.52       | 34                  | 5                  |
|             |          |       |                   |        |     | 82       | 92          | 612.34                                                            | 1222.67         | 1222.6      | 0.07  | 0    | 65         | 1.94E-05  | K.NMINTFVPSGK.V       | Oxidation (M)                          | 17.05       |                     |                    |
|             |          |       |                   |        |     | 93       | 100         | 482.28                                                            | 962.55          | 962.47      | 0.08  | 0    | 58         | 0.0001237 | K.VMQVVDEK.L          | Oxidation (M)                          |             |                     |                    |
| P61604      | 48%      | 313   | 5                 | 10925  | 8.9 | P61604   | CH10_HUMAN  | 10 kDa heat shock protein, mitochondrial                          | OS=Homo sapiens | GN=HSPE1    | PE=1  | SV=2 |            |           |                       |                                        | 18.79       | 35                  | 2                  |
|             |          |       |                   |        |     | 2        | 8           | 410.25                                                            | 818.49          | 818.44      | 0.05  | 1    | 35         | 0.0262376 | M.AGQAFRK.F           | Acetyl (Protein N-term)                | 24.91       |                     |                    |
|             |          |       |                   |        |     | 29       | 36          | 430.76                                                            | 859.52          | 859.45      | 0.07  | 0    | 67         | 1.92E-05  | K.GGIMLPEK.S          | Oxidation (M)                          | 25.34       |                     |                    |
|             |          |       |                   |        |     | 41       | 54          | 658.43                                                            | 1314.85         | 1314.75     | 0.1   | 0    | 85         | 2.47E-07  | K.VLQATVVAVGSGSK.G    |                                        | 22.26       |                     |                    |
|             |          |       |                   |        |     | 57       | 66          | 507.32                                                            | 1012.62         | 1012.56     | 0.07  | 0    | 60         | 6.79E-05  | K.GGEIQPVSVK.V        |                                        | 26.04       |                     |                    |
|             |          |       |                   |        |     | 71       | 80          | 538.84                                                            | 1075.66         | 1075.59     | 0.07  | 0    | 36         | 0.0204355 | K.VLLPEYGGTK.V        |                                        |             |                     |                    |
| P63218      | 26%      | 83    | 2                 | 7428   | 9.9 | P63218   | GBG5_HUMAN  | Guanine nucleotide-binding protein G(I)/G(S)/G(O) subunit gamma-5 | OS=Homo sapiens | GN=GNG5     | PE=1  | SV=3 |            |           |                       |                                        | 15.92       | 36                  | 1                  |
|             |          |       |                   |        |     | 2        | 12          | 555.81                                                            | 1109.6          | 1109.54     | 0.06  | 1    | 47         | 0.0013747 | M.SGSSVAAMKK.V        | Acetyl (Protein N-term); Oxidation (M) | 18.64       |                     |                    |
|             |          |       |                   |        |     | 19       | 25          | 386.74                                                            | 771.47          | 771.42      | 0.04  | 0    | 36         | 0.0238494 | R.LEAGLNR.V           |                                        |             |                     |                    |
| P78556      | 16%      | 65    | 2                 | 11154  | 9.2 | P78556   | CCL20_HUMAN | C-C motif chemokine 20                                            | OS=Homo sapiens | GN=CCL20    | PE=1  | SV=1 |            |           |                       |                                        | 27.27       | 36                  | 1                  |
|             |          |       |                   |        |     | 45       | 51          | 420.27                                                            | 838.53          | 838.47      | 0.06  | 0    | 31         | 0.0465033 | K.FIVGFTR.Q           |                                        | 18.34       |                     |                    |
|             |          |       |                   |        |     | 71       | 78          | 444.76                                                            | 887.51          | 887.45      | 0.05  | 0    | 34         | 0.035182  | K.LSVCANPK.Q          |                                        |             |                     |                    |
| P07602      | 6%       | 163   | 3                 | 59899  | 5.1 | P07602   | SAP_HUMAN   | Proactivator polypeptide                                          | OS=Homo sapiens | GN=PSAP     | PE=1  | SV=2 |            |           |                       |                                        | 22.65       | 36                  | 4                  |
|             |          |       |                   |        |     | 233      | 242         | 539.29                                                            | 1076.57         | 1076.5      | 0.08  | 0    | 44         | 0.0033836 | R.LGPGMADICK.N        | Oxidation (M)                          | 26.92       |                     |                    |
|             |          |       |                   |        |     | 430      | 438         | 507.83                                                            | 1013.64         | 1013.58     | 0.06  | 0    | 70         | 8.62E-06  | K.QEILAALEK.G         |                                        | 27.1        |                     |                    |
|             |          |       |                   |        |     | 439      | 449         | 656.35                                                            | 1310.68         | 1310.6      | 0.09  | 0    | 50         | 0.0006785 | K.GCSFLDPYQK.Q        |                                        |             |                     |                    |

**\*Footnotes to Supplemental Table10:**

Data sets were searched with the Mascot search engine (see Perkins et al. (1999)*Electrophoresis* 20, 3551-3567). Detailed are the SwissProt accession number, the number of distinct proteolytic peptides (in some cases the number of observed redundant peptide sequences is indicated in parentheses), and the sequence coverage of the protein (%). Listed is the Mascot protein score as well as the score and expectation value for the individual peptides. Additional columns indicate the position of the protein in the 1D-SDS PAGE gel (strongest lane in which the protein was identified, and the total # of adjacent gel lanes the protein was found) Proteins identified by single-peptide assignments for this experiment are not listed in this Table but in Supplemental Table 12.

**Supplemental Table 11. Proteins identified by HPLC-MS/MS on 5-day latex bead human THP-1 phagosome preparation.\***

ESI-MS/MS raw data obtained on a QSTAR Pulsar i instrument and Mascot search results for trypsin digestion of proteins separated on a 1D-SDS PAGE gel. For summary see Supplemental Table 1.

| accession # | coverage | score | distinct peptides | mass   | pl  | start AA                            | end AA          | m/z obs   | M obs  | M calc  | delta   | miss  | pept score | exp val   | peptide              | modifications          | retent time     | Strongest gel slice | # gel slices found |
|-------------|----------|-------|-------------------|--------|-----|-------------------------------------|-----------------|-----------|--------|---------|---------|-------|------------|-----------|----------------------|------------------------|-----------------|---------------------|--------------------|
| P35579      | 17%      | 1743  | 34                | 227646 | 5.5 | P35579 MYH9_HUMAN Myosin-9          | OS=Homo sapiens | GN=MYH9   | PE=1   | SV=4    |         |       |            |           |                      |                        |                 | 1                   | 2                  |
|             |          |       |                   |        |     |                                     |                 | 166 180   | 776.35 | 1550.69 | 1550.69 | 0     | 40         | 0.0073522 | R.EDQSILCTGEGSGAGK.T |                        |                 |                     |                    |
|             |          |       |                   |        |     |                                     |                 | 290 299   | 603.33 | 1204.64 | 1204.63 | 0.01  | 0          | 47        | 0.0016847            | K.TDLLLEPYNK.Y         |                 |                     | 18.62              |
|             |          |       |                   |        |     |                                     |                 | 359 373   | 804.33 | 1606.64 | 1606.69 | -0.05 | 0          | 78        | 1.12E-06             | R.NTDQASMPDNTAAQK.V    | Oxidation (M)   |                     | 20.99              |
|             |          |       |                   |        |     |                                     |                 | 408 419   | 653.34 | 1304.66 | 1304.66 | 0     | 0          | 71        | 5.52E-06             | K.EQADFAIEALAK.A       |                 |                     | 12.23              |
|             |          |       |                   |        |     |                                     |                 | 663 670   | 481.24 | 960.47  | 960.48  | -0.01 | 0          | 33        | 0.047481             | R.NTNPNFVR.C           |                 |                     | 21.51              |
|             |          |       |                   |        |     |                                     |                 | 694 702   | 509.26 | 1016.5  | 1016.51 | -0.01 | 0          | 33        | 0.0389718            | R.CNGVLEIGR.I          |                 |                     | 14.02              |
|             |          |       |                   |        |     |                                     |                 | 712 718   | 462.74 | 923.47  | 923.49  | -0.01 | 0          | 35        | 0.0215245            | R.VVFQEFR.Q            |                 |                     | 19.66              |
|             |          |       |                   |        |     |                                     |                 | 738 745   | 489.76 | 977.51  | 977.5   | 0     | 0          | 48        | 0.0014102            | K.QACVLMIK.A           | Oxidation (M)   |                     | 20.41              |
|             |          |       |                   |        |     |                                     |                 | 746 755   | 597.31 | 1192.6  | 1192.61 | -0.01 | 0          | 80        | 6.80E-07             | K.ALELDNLYR.I          |                 |                     | 19.18              |
|             |          |       |                   |        |     |                                     |                 | 843 856   | 585.59 | 1753.75 | 1753.77 | -0.02 | 1          | 34        | 0.0255754            | R.QEEEMMAKEEELVK.V     | 2 Oxidation (M) |                     | 20.77              |
|             |          |       |                   |        |     |                                     |                 | 868 882   | 892.43 | 1782.84 | 1782.84 | 0     | 0          | 60        | 6.09E-05             | R.LTEMETLQSQLMAEK.L    | 2 Oxidation (M) |                     | 13.97              |
|             |          |       |                   |        |     |                                     |                 | 1001 1014 | 827.4  | 1652.78 | 1652.78 | 0     | 0          | 54        | 0.0002554            | R.IAEFTTNLTTEEEEK.S    |                 |                     | 20.24              |
|             |          |       |                   |        |     |                                     |                 | 1001 1016 | 623.63 | 1867.88 | 1867.91 | -0.02 | 1          | 69        | 6.43E-06             | R.IAEFTTNLTTEEEESK.S   |                 |                     | 20.59              |
|             |          |       |                   |        |     |                                     |                 | 1220 1234 | 577.29 | 1728.85 | 1728.86 | -0.02 | 1          | 37        | 0.0112429            | K.QTLENERGELANEVK.V    |                 |                     | 19.93              |
|             |          |       |                   |        |     |                                     |                 | 1248 1260 | 514.29 | 1539.85 | 1539.9  | -0.04 | 2          | 33        | 0.0318784            | R.KKVEAQLQQLQVK.F      |                 |                     | 19.14              |
|             |          |       |                   |        |     |                                     |                 | 1250 1260 | 642.86 | 1283.7  | 1283.71 | -0.01 | 0          | 79        | 9.58E-07             | K.VEAQLQQLQVK.F        |                 |                     | 15.67              |
|             |          |       |                   |        |     |                                     |                 | 1445 1454 | 407.55 | 1219.62 | 1219.64 | -0.02 | 1          | 58        | 0.0001255            | K.KFDQLLAEEK.T         |                 |                     | 20.11              |
|             |          |       |                   |        |     |                                     |                 | 1446 1454 | 546.78 | 1091.54 | 1091.55 | -0.01 | 0          | 49        | 0.0008877            | K.FDQLLAEEK.T          |                 |                     | 19.97              |
|             |          |       |                   |        |     |                                     |                 | 1484 1492 | 532.75 | 1063.48 | 1063.49 | -0.01 | 0          | 41        | 0.0053362            | R.ALEEAMEQK.A          | Oxidation (M)   |                     | 21.71              |
|             |          |       |                   |        |     |                                     |                 | 1484 1497 | 554.93 | 1661.78 | 1661.79 | -0.02 | 1          | 62        | 3.98E-05             | R.ALEEAMEQKAEELR.L     | Oxidation (M)   |                     | 14.49              |
|             |          |       |                   |        |     |                                     |                 | 1504 1518 | 572.91 | 1715.69 | 1715.72 | -0.03 | 1          | 46        | 0.0017056            | R.TEMEDLMSKDDVGVK.S    | 2 Oxidation (M) |                     | 13.27              |
|             |          |       |                   |        |     |                                     |                 | 1529 1538 | 610.78 | 1219.55 | 1219.58 | -0.03 | 0          | 45        | 0.0024027            | R.ALEQQVEEMK.T         | Oxidation (M)   |                     | 14.06              |
|             |          |       |                   |        |     |                                     |                 | 1558 1566 | 531.27 | 1060.53 | 1060.56 | -0.02 | 0          | 45        | 0.0027237            | R.LEVNLQAMK.A          | Oxidation (M)   |                     | 18.49              |
|             |          |       |                   |        |     |                                     |                 | 1593 1603 | 465.54 | 1393.59 | 1393.6  | -0.01 | 1          | 34        | 0.0306351            | R.EMEALEDERK.Q         | Oxidation (M)   |                     | 13.1               |
|             |          |       |                   |        |     |                                     |                 | 1662 1669 | 451.23 | 900.45  | 900.49  | -0.04 | 0          | 34        | 0.0357421            | R.EEILAQAQK.E          |                 |                     | 14.54              |
|             |          |       |                   |        |     |                                     |                 | 1698 1716 | 697    | 2087.98 | 2087.97 | 0     | 1          | 54        | 0.0001969            | R.QAQQERDELADEIANSQK.G |                 |                     | 19.8               |
|             |          |       |                   |        |     |                                     |                 | 1717 1724 | 415.73 | 829.45  | 829.45  | -0.01 | 0          | 36        | 0.0245315            | K.GALLALEEK.R          |                 |                     | 15.24              |
|             |          |       |                   |        |     |                                     |                 | 1792 1802 | 426.55 | 1276.64 | 1276.67 | -0.03 | 1          | 61        | 5.85E-05             | K.VKLQEMEGTVK.S        | Oxidation (M)   |                     | 13.06              |
|             |          |       |                   |        |     |                                     |                 | 1794 1802 | 525.74 | 1049.46 | 1049.51 | -0.05 | 0          | 35        | 0.024006             | K.LQEMEGTVK.S          | Oxidation (M)   |                     | 12.67              |
|             |          |       |                   |        |     |                                     |                 | 1807 1815 | 452.26 | 902.5   | 902.51  | -0.01 | 0          | 53        | 0.0004218            | K.ASITALEAK.I          |                 |                     | 16.8               |
|             |          |       |                   |        |     |                                     |                 | 1816 1828 | 765.87 | 1529.73 | 1529.76 | -0.03 | 0          | 62        | 4.52E-05             | K.IAQLLEQLDNETK.E      |                 |                     | 20.06              |
|             |          |       |                   |        |     |                                     |                 | 1816 1830 | 605.97 | 1814.89 | 1814.9  | -0.01 | 1          | 64        | 2.17E-05             | K.IAQLLEQLDNETKER.Q    |                 |                     | 19.84              |
|             |          |       |                   |        |     |                                     |                 | 1878 1888 | 666.3  | 1330.58 | 1330.6  | -0.02 | 0          | 77        | 1.62E-06             | R.QLEEEAEEAQR.A        |                 |                     | 13.84              |
|             |          |       |                   |        |     |                                     |                 | 1899 1912 | 791.35 | 1580.68 | 1580.66 | 0.01  | 0          | 80        | 6.88E-07             | R.ELEDATEADAMNR.E      | Oxidation (M)   |                     | 14.32              |
| accession # | coverage | score | distinct peptides | mass   | pl  | start AA                            | end AA          | m/z obs   | M obs  | M calc  | delta   | miss  | pept score | exp val   | peptide              | modifications          | retent time     | Strongest gel slice | # gel slices found |
| Q9Y490      | 9%       | 1104  | 20                | 271766 | 5.8 | Q9Y490 TLN1_HUMAN Talin-1           | OS=Homo sapiens | GN=TLN1   | PE=1   | SV=3    |         |       |            |           |                      |                        |                 | 1                   | 2                  |
|             |          |       |                   |        |     |                                     |                 | 614 624   | 543.31 | 1084.61 | 1084.62 | -0.02 | 0          | 42        | 0.0052261            | K.GLGAVSELLR.S         |                 |                     | 22.3               |
|             |          |       |                   |        |     |                                     |                 | 625 634   | 507.25 | 1012.5  | 1012.49 | 0     | 0          | 46        | 0.0016636            | R.SAQPASAEPR.Q         |                 |                     | 12.36              |
|             |          |       |                   |        |     |                                     |                 | 899 910   | 610.31 | 1218.6  | 1218.6  | 0     | 0          | 89        | 9.57E-08             | R.MATNAAQNAIK.K        | Oxidation (M)   |                     | 13.01              |
|             |          |       |                   |        |     |                                     |                 | 944 957   | 728.4  | 1454.78 | 1454.76 | 0.03  | 0          | 90        | 7.64E-08             | K.ASAGPOPLLVSQCK.A     |                 |                     | 19.45              |
|             |          |       |                   |        |     |                                     |                 | 958 971   | 746.94 | 1491.86 | 1491.88 | -0.01 | 0          | 32        | 0.045477             | K.AVAEQIPLLVQGV.R      |                 |                     | 22.04              |
|             |          |       |                   |        |     |                                     |                 | 1026 1035 | 529.3  | 1056.58 | 1056.59 | -0.01 | 0          | 45        | 0.0022837            | K.NLGTALAELE.R         |                 |                     | 21.34              |
|             |          |       |                   |        |     |                                     |                 | 1191 1198 | 436.75 | 871.48  | 871.49  | -0.01 | 0          | 40        | 0.0101511            | K.AVTQALNR.C           |                 |                     | 13.36              |
|             |          |       |                   |        |     |                                     |                 | 1321 1332 | 599.3  | 1196.59 | 1196.64 | -0.05 | 0          | 42        | 0.0040618            | K.ALSTDPAAPNLK.S       |                 |                     | 17.53              |
|             |          |       |                   |        |     |                                     |                 | 1402 1415 | 717.86 | 1433.71 | 1433.72 | -0.01 | 0          | 78        | 1.18E-06             | K.VLGEAMTGISQNAK.N     | Oxidation (M)   |                     | 14.93              |
|             |          |       |                   |        |     |                                     |                 | 1416 1431 | 810.89 | 1619.76 | 1619.78 | -0.02 | 0          | 41        | 0.0056591            | K.NGNLPEFGDAISTASK.A   |                 |                     | 21.03              |
|             |          |       |                   |        |     |                                     |                 | 1531 1541 | 573.31 | 1144.6  | 1144.61 | 0     | 0          | 69        | 9.96E-06             | K.EVANSTANLVK.T        |                 |                     | 14.58              |
|             |          |       |                   |        |     |                                     |                 | 1594 1604 | 573.32 | 1144.62 | 1144.62 | 0     | 0          | 48        | 0.0011673            | R.AAMEPIVIAK.T         | Oxidation (M)   |                     | 18.7               |
|             |          |       |                   |        |     |                                     |                 | 1605 1618 | 732.38 | 1462.74 | 1462.74 | -0.01 | 0          | 59        | 9.01E-05             | K.TMLESAGLIQIQTAR.A    | Oxidation (M)   |                     | 20.19              |
|             |          |       |                   |        |     |                                     |                 | 1619 1625 | 370.72 | 739.42  | 739.43  | -0.02 | 0          | 31        | 0.0433239            | R.ALAVNPR.D            |                 |                     | 13.49              |
|             |          |       |                   |        |     |                                     |                 | 1752 1766 | 576.29 | 1725.86 | 1725.87 | -0.01 | 0          | 48        | 0.001015             | K.TLSHPQQMALLDQTK.T    | Oxidation (M)   |                     | 15.5               |
|             |          |       |                   |        |     |                                     |                 | 2032 2043 | 622.33 | 1242.65 | 1242.66 | -0.01 | 0          | 80        | 7.55E-07             | K.VLVQNAAGSQEK.L       |                 |                     | 13.23              |
|             |          |       |                   |        |     |                                     |                 | 2044 2057 | 708.89 | 1415.76 | 1415.77 | -0.01 | 0          | 80        | 6.44E-07             | K.LAQAAQSSVATITR.L     |                 |                     | 17.84              |
|             |          |       |                   |        |     |                                     |                 | 2090 2099 | 494.78 | 987.55  | 987.56  | -0.01 | 0          | 73        | 4.17E-06             | K.ALGDILISATK.A        |                 |                     | 20.81              |
|             |          |       |                   |        |     |                                     |                 | 2169 2177 | 533.25 | 1064.49 | 1064.51 | -0.02 | 0          | 41        | 0.0055006            | K.TSTPEDFIR.M          |                 |                     | 20.15              |
|             |          |       |                   |        |     |                                     |                 | 2351 2361 | 516.3  | 1030.59 | 1030.6  | -0.01 | 0          | 38        | 0.0133896            | K.SIAAATSALVK.A        |                 |                     | 19.89              |
| accession # | coverage | score | distinct peptides | mass   | pl  | start AA                            | end AA          | m/z obs   | M obs  | M calc  | delta   | miss  | pept score | exp val   | peptide              | modifications          | retent time     | Strongest gel slice | # gel slices found |
| P15144      | 9%       | 492   | 9                 | 109870 | 5.3 | P15144 JAMPN_HUMAN Aminopeptidase N | OS=Homo sapiens | GN=ANPEP  | PE=1   | SV=4    |         |       |            |           |                      |                        |                 | 2                   | 2                  |
|             |          |       |                   |        |     |                                     |                 | 205 219   | 545.28 | 1632.81 | 1632.86 | -0.05 | 2          | 55        | 0.0001896            | R.KVVATTQMQAADARK.S    | Oxidation (M)   |                     | 12.2               |
|             |          |       |                   |        |     |                                     |                 | 206 218   | 689.34 | 1376.66 | 1376.67 | -0.01 | 0          | 82        | 4.80E-07             | K.VVATTQMQAADAR.K      | Oxidation (M)   |                     | 12.82              |
|             |          |       |                   |        |     |                                     |                 | 242 252   | 609.82 | 1217.63 | 1217.63 | -0.01 | 0          | 37        | 0.0155245            | K.DLTALSNTLPK.G        | Oxidation (M)   |                     | 21.22              |
|             |          |       |                   |        |     |                                     |                 | 293 301   | 479.27 | 956.53  | 956.54  | -0.01 | 0          | 66        | 1.90E-05             | K.QASNGVLR.I           |                 |                     | 14.91              |
|             |          |       |                   |        |     |                                     |                 | 364 379   | 862.9  | 1723.79 | 1723.83 | -0.04 | 0          | 41        | 0.0054771            | R.ENSLFDPLSSSSSNK.E    |                 |                     | 22.01              |
|             |          |       |                   |        |     |                                     |                 | 364 381   | 670.64 | 2008.91 | 2008.97 | -0.06 | 1          | 40        | 0.0058471            | R.ENSLFDPLSSSSSNKER.V  |                 |                     | 21.27              |
|             |          |       |                   |        |     |                                     |                 | 642 648   | 443.75 | 885.49  | 885.5   | -0.01 | 0          | 39        | 0.0100636            | K.IQTLQLR.D            |                 |                     | 13.47              |
|             |          |       |                   |        |     |                                     |                 | 844 855   | 734.39 | 1466.76 | 1466.78 | -0.02 | 0          | 67        | 1.42E-05             | R.YLSYTLNPDLIR.K       |                 |                     | 21.84              |
|             |          |       |                   |        |     |                                     |                 | 924 935   | 635.28 | 1268.54 | 1268.53 | 0.01  | 0          | 65        | 2.47E-05             | K.DNEETGFGSGTR.A       |                 |                     | 14.43              |

Strongest gel slice # gel slices found



| accession # | coverage | score | distinct peptides | mass   | pl  | start AA | end AA                                                                                  | m/z obs | M obs | M calc | delta   | miss    | pept score | exp val | peptide | modifications | retent time           | slice | found               |                    |
|-------------|----------|-------|-------------------|--------|-----|----------|-----------------------------------------------------------------------------------------|---------|-------|--------|---------|---------|------------|---------|---------|---------------|-----------------------|-------|---------------------|--------------------|
| P11279      | 5%       | 98    | 2                 | 45367  | 9   | P11279   | LAMP1_HUMAN                                                                             | 138     | 146   | 517.28 | 1032.54 | 1032.55 | -0.01      | 0       | 54      | 0.0003488     | K.IVESITDIR.A         | 19.73 | 2                   | 1                  |
|             |          |       |                   |        |     |          | Lysozyme-associated membrane glycoprotein 1 OS=Homo sapiens GN=LAMP1 PE=1 SV=3          | 327     | 337   | 576.28 | 1150.55 | 1150.6  | -0.05      | 0       | 45      | 0.0023935     | R.ALQATVGNYSYK.C      | 14.82 |                     |                    |
|             |          |       |                   |        |     |          |                                                                                         |         |       |        |         |         |            |         |         |               |                       |       |                     |                    |
| P07814      | 4%       | 299   | 6                 | 172137 | 7   | P07814   | SYEP_HUMAN                                                                              | 426     | 435   | 558.32 | 1114.63 | 1114.63 | 0          | 0       | 58      | 0.0001289     | R.LNLNNTVLSK.R        | 20.13 | Strongest gel slice | # gel slices found |
|             |          |       |                   |        |     |          | Bifunctional aminoacyl-tRNA synthetase OS=Homo sapiens GN=EPRS PE=1 SV=3                | 587     | 593   | 380.22 | 758.43  | 758.45  | -0.03      | 0       | 44      | 0.0039996     | K.IISLDAK.F           | 17.68 |                     |                    |
|             |          |       |                   |        |     |          |                                                                                         | 757     | 765   | 471.77 | 941.53  | 941.53  | 0          | 0       | 37      | 0.0131988     | R.VAVQGDVVR.E         | 14.21 |                     |                    |
|             |          |       |                   |        |     |          |                                                                                         | 890     | 902   | 671.81 | 1341.61 | 1341.64 | -0.03      | 0       | 48      | 0.0011557     | R.NSEPAGLETPK.V       | 15.17 |                     |                    |
|             |          |       |                   |        |     |          |                                                                                         | 992     | 1009  | 794.36 | 1586.71 | 1586.73 | -0.02      | 0       | 54      | 0.0003091     | K.NQGGGLSSSGAGEGQGP.K | 12.99 |                     |                    |
|             |          |       |                   |        |     |          |                                                                                         | 1390    | 1400  | 602.8  | 1203.58 | 1203.6  | -0.02      | 0       | 61      | 5.94E-05      | K.LTVAENEAETK.L       | 13.95 |                     |                    |
| Q9Y4L1      | 4%       | 146   | 3                 | 111494 | 5.2 | Q9Y4L1   | HYOU1_HUMAN                                                                             | 283     | 291   | 524.28 | 1046.54 | 1046.55 | -0.01      | 0       | 51      | 0.0007122     | R.LAGLFNEQR.K         | 20.43 | Strongest gel slice | # gel slices found |
|             |          |       |                   |        |     |          | Hypoxia up-regulated protein 1 OS=Homo sapiens GN=HYOU1 PE=1 SV=1                       | 670     | 686   | 546.27 | 1635.78 | 1635.81 | -0.03      | 1       | 52      | 0.0004142     | K.AEAGPEGVAPAPEGEKK.Q | 13.38 |                     |                    |
|             |          |       |                   |        |     |          |                                                                                         | 878     | 889   | 432.6  | 1294.76 | 1294.79 | -0.02      | 0       | 44      | 0.0026561     | K.LPATEKPVLLSK.D      | 18.85 |                     |                    |
| Q32MZ4      | 3%       | 141   | 2                 | 89826  | 4.6 | Q32MZ4   | LRRF1_HUMAN                                                                             | 618     | 631   | 758.37 | 1514.72 | 1514.72 | 0          | 0       | 59      | 8.93E-05      | K.SAVEAQNEVTENPK.Q    | 13.73 | Strongest gel slice | # gel slices found |
|             |          |       |                   |        |     |          | Leucine-rich repeat flightless-interacting protein 1 OS=Homo sapiens GN=LRRF1 PE=1 SV=2 | 707     | 719   | 650.81 | 1299.61 | 1299.63 | -0.03      | 0       | 82      | 4.74E-07      | K.IDGATQSSPAEPK.S     | 13.21 |                     |                    |
| P41252      | 3%       | 140   | 3                 | 146178 | 5.9 | P41252   | SYIC_HUMAN                                                                              | 423     | 432   | 616.8  | 1231.59 | 1231.62 | -0.03      | 0       | 57      | 0.0001432     | R.VENMVDQLLR.N        | 20.61 | Strongest gel slice | # gel slices found |
|             |          |       |                   |        |     |          | Isoleucyl-tRNA synthetase, cytoplasmic OS=Homo sapiens GN=IARS PE=1 SV=1                | 629     | 638   | 587.34 | 1172.66 | 1172.69 | -0.04      | 0       | 35      | 0.0289747     | R.LYLINSPVVR.A        | 21.31 |                     |                    |
|             |          |       |                   |        |     |          |                                                                                         | 922     | 933   | 733.36 | 1464.71 | 1464.71 | 0          | 0       | 48      | 0.0010514     | K.QLSSEELEQFQK.T      | 20.34 |                     |                    |
| O43491      | 2%       | 77    | 2                 | 113032 | 5.3 | O43491   | E4L12_HUMAN                                                                             | 2       | 13    | 653.34 | 1304.66 | 1304.68 | -0.03      | 1       | 46      | 0.0016761     | M.TTEVGSVSEVKK.D      | 15.95 | Strongest gel slice | # gel slices found |
|             |          |       |                   |        |     |          | Band 4.1-like protein 2 OS=Homo sapiens GN=EPB41L2 PE=1 SV=1                            | 497     | 505   | 497.77 | 993.52  | 993.55  | -0.03      | 0       | 34      | 0.0277282     | R.LVSPQPPK.A          | 13.9  |                     |                    |
| Q00610      | 2%       | 135   | 3                 | 193260 | 5.5 | Q00610   | CLH1_HUMAN                                                                              | 572     | 583   | 456.88 | 1367.63 | 1367.69 | -0.06      | 0       | 54      | 0.0002884     | K.NNRPSEGLQTR.L       | 13.12 | Strongest gel slice | # gel slices found |
|             |          |       |                   |        |     |          | Clathrin heavy chain 1 OS=Homo sapiens GN=CLTC PE=1 SV=5                                | 882     | 892   | 667.82 | 1333.62 | 1333.63 | -0.01      | 0       | 32      | 0.0414604     | K.IYIDSNPPER.F        | 15.86 |                     |                    |
|             |          |       |                   |        |     |          |                                                                                         | 1398    | 1406  | 563.79 | 1125.57 | 1125.58 | -0.02      | 0       | 49      | 0.0009077     | K.VANVELYYR.A         | 20.17 |                     |                    |
| P14625      | 16%      | 665   | 13                | 92696  | 4.8 | P14625   | ENPL_HUMAN                                                                              | 76      | 84    | 541.27 | 1080.52 | 1080.54 | -0.01      | 0       | 42      | 0.0045233     | K.FAFQAEVNR.M         | 20.16 | Strongest gel slice | # gel slices found |
|             |          |       |                   |        |     |          | Endoplasmic OS=Homo sapiens GN=HSP90B1 PE=1 SV=1                                        | 88      | 95    | 482.29 | 962.57  | 962.58  | -0.01      | 0       | 40      | 0.0082875     | K.LIINSLYK.N          | 20.79 |                     |                    |
|             |          |       |                   |        |     |          |                                                                                         | 103     | 114   | 638.32 | 1274.62 | 1274.64 | -0.01      | 0       | 71      | 5.40E-06      | R.ELISNASDALDK.I      | 19.9  |                     |                    |
|             |          |       |                   |        |     |          |                                                                                         | 103     | 116   | 515.61 | 1543.8  | 1543.82 | -0.02      | 1       | 50      | 0.0007579     | R.ELISNASDALDKIR.L    | 20.66 |                     |                    |
|             |          |       |                   |        |     |          |                                                                                         | 143     | 156   | 510.59 | 1528.74 | 1528.77 | -0.02      | 0       | 56      | 0.0001649     | K.NLLHVTDTGVGMTR.E    | 19.45 |                     |                    |
|             |          |       |                   |        |     |          |                                                                                         | 169     | 177   | 491.74 | 981.46  | 981.48  | -0.01      | 0       | 44      | 0.002807      | K.SGTSEFLNK.M         | 15.87 |                     |                    |
|             |          |       |                   |        |     |          |                                                                                         | 435     | 448   | 743.38 | 1484.74 | 1484.75 | 0          | 0       | 82      | 4.30E-07      | K.GVVDSDDLPLNVSR.E    | 20.74 |                     |                    |
|             |          |       |                   |        |     |          |                                                                                         | 538     | 546   | 524.24 | 1046.46 | 1046.49 | -0.03      | 0       | 36      | 0.0197064     | K.IYFMAGSSR.R         | 18.09 |                     |                    |
|             |          |       |                   |        |     |          |                                                                                         | 548     | 557   | 575.76 | 1149.52 | 1149.53 | -0.01      | 0       | 66      | 1.91E-05      | K.EAESPFVER.L         | 17.09 |                     |                    |
|             |          |       |                   |        |     |          |                                                                                         | 594     | 605   | 466.22 | 1395.64 | 1395.69 | -0.04      | 2       | 42      | 0.00461       | K.EGVKDFESEKTK.E      | 13.06 |                     |                    |
|             |          |       |                   |        |     |          |                                                                                         | 672     | 682   | 645.29 | 1288.56 | 1288.59 | -0.03      | 0       | 56      | 0.00021       | K.DISTNYYSQK.K        | 18.31 |                     |                    |
|             |          |       |                   |        |     |          |                                                                                         | 725     | 733   | 497.26 | 992.5   | 992.52  | -0.01      | 0       | 52      | 0.0004659     | R.SGYLLPDTK.A         | 19.94 |                     |                    |
|             |          |       |                   |        |     |          |                                                                                         | 745     | 754   | 543.29 | 1084.56 | 1084.58 | -0.01      | 0       | 37      | 0.0164126     | R.LSLNIDPAK.V         | 20.52 |                     |                    |
| P12814      | 8%       | 337   | 6                 | 103563 | 5.3 | P12814   | ACTN1_HUMAN                                                                             | 96      | 103   | 432.74 | 863.47  | 863.48  | -0.01      | 0       | 50      | 0.0007957     | K.ALDFIASK.G          | 20.48 | Strongest gel slice | # gel slices found |
|             |          |       |                   |        |     |          | Alpha-actinin-1 OS=Homo sapiens GN=ACTN1 PE=1 SV=2                                      | 134     | 147   | 769.39 | 1536.76 | 1536.77 | -0.01      | 0       | 73      | 3.23E-06      | R.FAIQDISVEETSAK.E    | 21.01 |                     |                    |
|             |          |       |                   |        |     |          |                                                                                         | 347     | 359   | 493.23 | 1476.68 | 1476.71 | -0.04      | 0       | 38      | 0.01309       | R.LSNRPAFMPSEGR.M     | 14.11 |                     |                    |
|             |          |       |                   |        |     |          |                                                                                         | 727     | 738   | 715.38 | 1428.75 | 1428.76 | -0.01      | 0       | 67      | 1.31E-05      | R.TINEVENQILTR.D      | 20.7  |                     |                    |
|             |          |       |                   |        |     |          |                                                                                         | 742     | 752   | 677.8  | 1353.58 | 1353.6  | -0.01      | 0       | 67      | 1.35E-05      | K.GISQEQMNEFR.A       | 15.34 |                     |                    |
|             |          |       |                   |        |     |          |                                                                                         | 795     | 803   | 530.77 | 1059.53 | 1059.54 | -0.01      | 0       | 43      | 0.0044982     | R.IMSIVDPNR.L         | 16.43 |                     |                    |
|             |          |       |                   |        |     |          |                                                                                         |         |       |        |         |         |            |         |         |               |                       |       |                     |                    |
| P34932      | 6%       | 249   | 4                 | 95127  | 5.1 | P34932   | HSP74_HUMAN                                                                             | 222     | 234   | 661.35 | 1320.69 | 1320.7  | -0.01      | 0       | 94      | 2.83E-08      | K.VLATAFDTTLGGR.K     | 21.06 | Strongest gel slice | # gel slices found |
|             |          |       |                   |        |     |          | Heat shock 70 kDa protein 4 OS=Homo sapiens GN=HSPA4 PE=1 SV=4                          | 361     | 374   | 760.37 | 1518.73 | 1518.75 | -0.02      | 0       | 49      | 0.0008214     | K.ELSTLNADEAVTR.G     | 19.98 |                     |                    |
|             |          |       |                   |        |     |          |                                                                                         | 544     | 557   | 750.33 | 1498.64 | 1498.61 | 0.03       | 0       | 46      | 0.0018395     | K.AESEEMETSQAGSK.D    | 12.32 |                     |                    |
|             |          |       |                   |        |     |          |                                                                                         | 755     | 764   | 567.3  | 1132.58 | 1132.58 | 0          | 0       | 60      | 7.26E-05      | K.QSLTMDPVVK.S        | 15.47 |                     |                    |
|             |          |       |                   |        |     |          |                                                                                         |         |       |        |         |         |            |         |         |               |                       |       |                     |                    |
| O43707      | 5%       | 280   | 4                 | 105245 | 5.3 | O43707   | ACTN4_HUMAN                                                                             | 115     | 122   | 432.74 | 863.47  | 863.48  | -0.01      | 0       | 50      | 0.0007957     | K.ALDFIASK.G          | 20.48 | Strongest gel slice | # gel slices found |
|             |          |       |                   |        |     |          | Alpha-actinin-4 OS=Homo sapiens GN=ACTN4 PE=1 SV=2                                      | 153     | 166   | 769.39 | 1536.76 | 1536.77 | -0.01      | 0       | 73      | 3.23E-06      | R.FAIQDISVEETSAK.E    | 21.01 |                     |                    |
|             |          |       |                   |        |     |          |                                                                                         | 746     | 757   | 715.38 | 1428.75 | 1428.76 | -0.01      | 0       | 67      | 1.31E-05      | R.TINEVENQILTR.D      | 20.7  |                     |                    |
|             |          |       |                   |        |     |          |                                                                                         |         |       |        |         |         |            |         |         |               |                       |       |                     |                    |

| accession # | coverage | score | distinct peptides | mass   | pl  | start AA | end AA      | m/z obs                                     | M obs           | M calc      | delta   | miss    | pept score | exp val   | peptide             | modifications | retent time         | Strongest gel slice | # gel slices found |
|-------------|----------|-------|-------------------|--------|-----|----------|-------------|---------------------------------------------|-----------------|-------------|---------|---------|------------|-----------|---------------------|---------------|---------------------|---------------------|--------------------|
| P13639      | 3%       | 160   | 3                 | 96246  | 6.4 | P13639   | EF2_HUMAN   | Elongation factor 2                         | OS=Homo sapiens | GN=EEF2     | PE=1    | SV=4    | 59         | 7.78E-05  | K.GISQEQMQEFR.A     | Oxidation (M) | 15.3                | 3                   | 2                  |
|             |          |       |                   |        |     |          |             | 2                                           | 10              | 546.3       | 1090.58 | 1090.58 | 0          | 0         | 59                  | 0.0001046     | M.VNFTVDQIR.A       |                     | 20.34              |
|             |          |       |                   |        |     |          |             | 227                                         | 235             | 551.77      | 1101.52 | 1101.52 | 0          | 0         | 44                  | 0.0030123     | K.QFAEMYVAK.F       | Oxidation (M)       | 17.61              |
|             |          |       |                   |        |     |          |             | 416                                         | 426             | 554.32      | 1106.62 | 1106.63 | -0.01      | 0         | 57                  | 0.0001593     | R.VFSGLVSTGLK.V     |                     | 20.83              |
| P05107      | 3%       | 146   | 2                 | 87976  | 6.7 | P05107   | ITB2_HUMAN  | Integrin beta-2                             | OS=Homo sapiens | GN=ITGB2    | PE=1    | SV=2    | 60         | 6.58E-05  | K.LAENNIQPIFAVTSR.M | Oxidation (M) | 21.23               | 3                   | 2                  |
|             |          |       |                   |        |     |          |             | 166                                         | 174             | 485.25      | 968.49  | 968.5   | -0.01      | 0         | 55                  | 0.0002347     | R.IGFGSFDVTK.T      |                     | 21.55              |
|             |          |       |                   |        |     |          |             | 311                                         | 325             | 836.95      | 1671.89 | 1671.89 | -0.01      | 0         | 60                  | 6.58E-05      | K.LAENNIQPIFAVTSR.M |                     | 21.55              |
| Q8WUM4      | 3%       | 110   | 3                 | 96590  | 6.1 | Q8WUM4   | PDC6L_HUMAN | Programmed cell death 6-interacting protein | OS=Homo sapiens | GN=PDC6IP   | PE=1    | SV=1    | 36         | 0.018968  | K.FGEEIAR.L         | Oxidation (M) | 15.91               | 3                   | 1                  |
|             |          |       |                   |        |     |          |             | 270                                         | 276             | 411.2       | 820.39  | 820.41  | -0.02      | 0         | 36                  | 0.018968      | K.FGEEIAR.L         |                     | 16.61              |
|             |          |       |                   |        |     |          |             | 340                                         | 350             | 585.32      | 1168.62 | 1168.65 | -0.03      | 0         | 38                  | 0.0122726     | K.STPVNVPIQKF.F     |                     | 16.39              |
|             |          |       |                   |        |     |          |             | 567                                         | 574             | 459.23      | 916.45  | 916.45  | 0          | 0         | 36                  | 0.0217841     | R.EGLENDLK.S        |                     | 16.39              |
| P11586      | 3%       | 102   | 2                 | 102180 | 6.9 | P11586   | C1TC_HUMAN  | C-1-tetrahydrofolate synthase, cytoplasmic  | OS=Homo sapiens | GN=MTHFD1   | PE=1    | SV=3    | 55         | 0.0002305 | K.TDPTTLTDEEINR.F   | Oxidation (M) | 19.81               | 3                   | 1                  |
|             |          |       |                   |        |     |          |             | 505                                         | 517             | 752.86      | 1503.7  | 1503.71 | -0.01      | 0         | 55                  | 0.0002305     | K.TDPTTLTDEEINR.F   |                     | 22.35              |
|             |          |       |                   |        |     |          |             | 879                                         | 889             | 585.35      | 1168.69 | 1168.7  | -0.01      | 0         | 49                  | 0.0009161     | K.GVPTGFIPIR.D      |                     | 22.35              |
| P22314      | 2%       | 129   | 2                 | 118858 | 5.5 | P22314   | UBA1_HUMAN  | Ubiquitin-like modifier-activating enzyme 1 | OS=Homo sapiens | GN=UBA1     | PE=1    | SV=3    | 60         | 6.70E-05  | R.LAGTQPLEVLEAVQR.S | Oxidation (M) | 22.17               | 3                   | 1                  |
|             |          |       |                   |        |     |          |             | 679                                         | 693             | 812.44      | 1622.86 | 1622.9  | -0.04      | 0         | 60                  | 6.70E-05      | R.LAGTQPLEVLEAVQR.S |                     | 17.13              |
|             |          |       |                   |        |     |          |             | 1011                                        | 1021            | 652.82      | 1303.63 | 1303.64 | -0.01      | 0         | 70                  | 7.18E-06      | R.LDQPMTEIVSR.V     |                     | 17.13              |
| Q14697      | 2%       | 73    | 2                 | 107263 | 5.7 | Q14697   | GANAB_HUMAN | Neutral alpha-glucosidase AB                | OS=Homo sapiens | GN=GANAB    | PE=1    | SV=3    | 40         | 0.0097477 | R.SLLLSVNR.G        | Oxidation (M) | 20.61               | 3                   | 1                  |
|             |          |       |                   |        |     |          |             | 158                                         | 164             | 437.23      | 872.46  | 872.46  | -0.01      | 0         | 34                  | 0.0370002     | R.LDLLEDR.S         |                     | 20.57              |
|             |          |       |                   |        |     |          |             | 165                                         | 173             | 486.79      | 971.56  | 971.58  | -0.02      | 0         | 40                  | 0.0097477     | R.SLLLSVNR.G        |                     | 20.57              |
| P08238      | 22%      | 977   | 17                | 83554  | 5   | P08238   | HS90B_HUMAN | Heat shock protein HSP 90-beta              | OS=Homo sapiens | GN=HSP90AB1 | PE=1    | SV=4    | 82         | 4.56E-07  | R.ELISNASDALDK.I    | Oxidation (M) | 19.81               | 5                   | 4                  |
|             |          |       |                   |        |     |          |             | 56                                          | 69              | 513.92      | 1538.73 | 1538.75 | -0.02      | 1         | 50                  | 0.0007208     | R.YESLTDPSKLDKSGK.E |                     | 18.94              |
|             |          |       |                   |        |     |          |             | 73                                          | 82              | 597.82      | 1193.62 | 1193.64 | -0.02      | 0         | 60                  | 7.59E-05      | K.IDIIPNPQER.T      |                     | 20.25              |
|             |          |       |                   |        |     |          |             | 83                                          | 95              | 683.36      | 1364.7  | 1364.72 | -0.03      | 0         | 70                  | 6.34E-06      | R.TLTLVDTGIGMTK.A   |                     | 20.47              |
|             |          |       |                   |        |     |          |             | 96                                          | 107             | 621.85      | 1241.68 | 1241.7  | -0.02      | 0         | 72                  | 4.75E-06      | K.ADLINNLGTTAK.S    |                     | 21.04              |
|             |          |       |                   |        |     |          |             | 187                                         | 196             | 656.29      | 1310.57 | 1310.56 | 0.01       | 0         | 63                  | 3.41E-05      | K.EDQTEYLEER.R      |                     | 18.2               |
|             |          |       |                   |        |     |          |             | 276                                         | 284             | 576.27      | 1150.53 | 1150.55 | -0.02      | 0         | 49                  | 0.0008852     | K.YIDQEELNK.T       |                     | 15.25              |
|             |          |       |                   |        |     |          |             | 338                                         | 347             | 412.87      | 1235.58 | 1235.63 | -0.05      | 1         | 34                  | 0.0262071     | R.RAPFDLFENK.K      |                     | 21.08              |
|             |          |       |                   |        |     |          |             | 338                                         | 348             | 455.56      | 1363.66 | 1363.72 | -0.06      | 2         | 42                  | 0.0044036     | R.RAPFDLFENK.K      |                     | 20.2               |
|             |          |       |                   |        |     |          |             | 339                                         | 347             | 540.76      | 1079.5  | 1079.53 | -0.02      | 0         | 49                  | 0.0008559     | R.APFDFLFENK.K      |                     | 21.86              |
|             |          |       |                   |        |     |          |             | 379                                         | 392             | 757.39      | 1512.77 | 1512.78 | 0          | 0         | 106                 | 1.70E-09      | R.GVVDSEDLPLNISR.E  |                     | 21.17              |
|             |          |       |                   |        |     |          |             | 429                                         | 435             | 446.21      | 890.4   | 890.42  | -0.02      | 0         | 43                  | 0.00479       | K.FYEFASF.K         |                     | 19.59              |
|             |          |       |                   |        |     |          |             | 439                                         | 448             | 381.18      | 1140.51 | 1140.55 | -0.04      | 0         | 38                  | 0.0109132     | K.LGIHEDSTNR.R      |                     | 13.04              |
|             |          |       |                   |        |     |          |             | 482                                         | 491             | 580.78      | 1159.55 | 1159.58 | -0.02      | 0         | 48                  | 0.0014298     | K.SIYYITGESK.E      |                     | 19.86              |
|             |          |       |                   |        |     |          |             | 492                                         | 502             | 625.3       | 1248.58 | 1248.61 | -0.03      | 0         | 65                  | 2.05E-05      | K.EQVANSFAFVER.V    |                     | 16.73              |
|             |          |       |                   |        |     |          |             | 532                                         | 538             | 367.22      | 732.43  | 732.44  | -0.01      | 0         | 39                  | 0.0109706     | K.SLVSVTK.E         |                     | 14.34              |
|             |          |       |                   |        |     |          |             | 613                                         | 623             | 648.78      | 1295.55 | 1295.48 | 0.06       | 0         | 36                  | 0.0180379     | R.DNSTMGYMMAK.K     | 3 Oxidation (M)     | 12.78              |
| P07900      | 18%      | 776   | 13                | 85006  | 4.9 | P07900   | HS90A_HUMAN | Heat shock protein HSP 90-alpha             | OS=Homo sapiens | GN=HSP90AA1 | PE=1    | SV=5    | 82         | 4.29E-07  | R.ELISNASDALDK.I    | Oxidation (M) | 18.98               | 5                   | 3                  |
|             |          |       |                   |        |     |          |             | 61                                          | 74              | 513.92      | 1538.73 | 1538.75 | -0.02      | 1         | 50                  | 0.0007208     | R.YESLTDPSKLDKSGK.E |                     | 18.94              |
|             |          |       |                   |        |     |          |             | 88                                          | 100             | 683.36      | 1364.7  | 1364.72 | -0.03      | 0         | 70                  | 6.34E-06      | R.TLTLVDTGIGMTK.A   |                     | 20.47              |
|             |          |       |                   |        |     |          |             | 101                                         | 112             | 621.85      | 1241.68 | 1241.7  | -0.02      | 0         | 72                  | 4.75E-06      | K.ADLINNLGTTAK.S    |                     | 21.04              |
|             |          |       |                   |        |     |          |             | 192                                         | 201             | 656.29      | 1310.57 | 1310.56 | 0.01       | 0         | 63                  | 3.41E-05      | K.EDQTEYLEER.R      |                     | 18.2               |
|             |          |       |                   |        |     |          |             | 284                                         | 292             | 576.27      | 1150.53 | 1150.55 | -0.02      | 0         | 49                  | 0.0008852     | K.YIDQEELNK.T       |                     | 15.25              |
|             |          |       |                   |        |     |          |             | 346                                         | 355             | 632.82      | 1263.62 | 1263.64 | -0.01      | 1         | 39                  | 0.0090779     | R.RAPFDLFENR.K      |                     | 21.39              |
|             |          |       |                   |        |     |          |             | 347                                         | 355             | 554.76      | 1107.51 | 1107.53 | -0.03      | 0         | 49                  | 0.0009397     | R.APFDFLFENR.K      |                     | 22                 |
|             |          |       |                   |        |     |          |             | 387                                         | 400             | 757.39      | 1512.77 | 1512.78 | 0          | 0         | 106                 | 1.70E-09      | R.GVVDSEDLPLNISR.E  |                     | 21.17              |
|             |          |       |                   |        |     |          |             | 447                                         | 456             | 390.18      | 1167.53 | 1167.56 | -0.04      | 0         | 37                  | 0.013625      | K.LGIHEDSQNR.K      |                     | 12.95              |
|             |          |       |                   |        |     |          |             | 490                                         | 499             | 612.81      | 1223.61 | 1223.62 | -0.01      | 0         | 42                  | 0.0044268     | K.HIYYITGETK.D      |                     | 16.38              |
|             |          |       |                   |        |     |          |             | 500                                         | 510             | 618.3       | 1234.58 | 1234.59 | -0.02      | 0         | 73                  | 3.31E-06      | K.DQVANSFAFVER.L    |                     | 18.03              |
|             |          |       |                   |        |     |          |             | 540                                         | 546             | 374.22      | 746.42  | 746.45  | -0.03      | 0         | 44                  | 0.0040311     | K.TLVSVTK.E         |                     | 14.12              |
| P06396      | 9%       | 428   | 7                 | 86043  | 5.9 | P06396   | GELS_HUMAN  | Gelsolin                                    | OS=Homo sapiens | GN=GSN      | PE=1    | SV=1    | 33         | 0.0308306 | K.AGKEPGLQIWR.V     | Oxidation (M) | 20.07               | 5                   | 1                  |
|             |          |       |                   |        |     |          |             | 62                                          | 72              | 418.89      | 1253.64 | 1253.69 | -0.05      | 1         | 33                  | 0.0308306     | K.AGKEPGLQIWR.V     |                     | 14.52              |
|             |          |       |                   |        |     |          |             | 178                                         | 188             | 425.9       | 1274.67 | 1274.71 | -0.04      | 0         | 32                  | 0.0409862     | K.HVVPNEVVQRL.L     |                     | 20.56              |
|             |          |       |                   |        |     |          |             | 585                                         | 597             | 660.34      | 1318.67 | 1318.69 | -0.01      | 0         | 92                  | 5.16E-08      | K.AGALNSNDAFVLK.T   |                     | 16.42              |
|             |          |       |                   |        |     |          |             | 616                                         | 623             | 444.24      | 886.46  | 886.49  | -0.02      | 0         | 63                  | 4.64E-05      | K.TGAQELLR.V        |                     | 14.3               |
|             |          |       |                   |        |     |          |             | 714                                         | 728             | 555.92      | 1664.73 | 1664.77 | -0.05      | 1         | 48                  | 0.0009781     | K.DSQEETEALTSK.R    |                     | 13.82              |
|             |          |       |                   |        |     |          |             | 730                                         | 738             | 539.75      | 1077.49 | 1077.51 | -0.02      | 0         | 62                  | 5.01E-05      | R.YIETDPANR.D       |                     | 14.39              |
|             |          |       |                   |        |     |          |             | 742                                         | 748             | 379.23      | 756.45  | 756.47  | -0.02      | 0         | 35                  | 0.0256759     | R.TPITVVK.Q         |                     | 14.39              |

| accession # | coverage | score  | distinct peptides | mass    | pl    | start AA           | end AA                           | m/z obs         | M obs            | M calc | delta | miss | pept score | exp val | peptide | modifications | retent time | Strongest gel slice | # gel slices found |  |         |         |       |   |     |           |                           |       |
|-------------|----------|--------|-------------------|---------|-------|--------------------|----------------------------------|-----------------|------------------|--------|-------|------|------------|---------|---------|---------------|-------------|---------------------|--------------------|--|---------|---------|-------|---|-----|-----------|---------------------------|-------|
| P27824      | 6%       | 156    | 3                 | 67982   | 4.5   | P27824 CALX_HUMAN  | Calnexin                         | OS=Homo sapiens | GN=CANX          | PE=1   | SV=2  |      |            |         |         |               |             |                     |                    |  |         |         |       |   |     |           |                           |       |
|             |          |        |                   |         |       |                    |                                  |                 |                  |        |       | 211  | 217        | 420.2   |         |               |             |                     |                    |  | 838.38  | 838.41  | -0.03 | 0 | 36  | 0.0157784 | K.TGIYEK.H                | 13.52 |
|             |          |        |                   |         |       |                    |                                  |                 |                  |        |       | 552  | 573        | 616.3   |         |               |             |                     |                    |  | 2461.17 | 2461.12 | 0.05  | 2 | 53  | 0.0002724 | K.QKSDAEDGGTVSQEEEDRKPK.A | 12.73 |
|             |          |        |                   |         |       |                    |                                  |                 |                  |        |       | 574  | 582        | 544.76  |         |               |             |                     |                    |  | 1087.5  | 1087.51 | -0.02 | 0 | 67  | 1.55E-05  | K.AEEDEILNR.S             | 17.47 |
| Q14108      | 5%       | 87     | 2                 | 54712   | 5     | Q14108 SCRB2_HUMAN | Lysosome membrane protein 2      | OS=Homo sapiens | GN=SCARB2        | PE=1   | SV=2  |      |            |         |         |               |             |                     |                    |  |         |         |       |   |     |           |                           |       |
|             |          |        |                   |         |       |                    |                                  |                 |                  |        |       | 83   | 92         | 606.78  |         |               |             |                     |                    |  | 1211.55 | 1211.58 | -0.03 | 0 | 45  | 0.0021862 | R.VEEVGPHYTR.E            | 19.46 |
|             |          |        |                   |         |       |                    |                                  |                 |                  |        |       | 391  | 402        | 469.9   |         |               |             |                     |                    |  | 1406.67 | 1406.7  | -0.04 | 1 | 42  | 0.0040419 | K.KLDDFVETGDIR.T          | 20.38 |
|             |          |        |                   |         |       |                    |                                  |                 |                  |        |       |      |            |         |         |               |             |                     |                    |  |         |         |       |   |     |           |                           |       |
| Q14974      | 3%       | 129    | 3                 | 98420   | 4.7   | Q14974 IIMB1_HUMAN | Importin subunit beta-1          | OS=Homo sapiens | GN=KPNB1         | PE=1   | SV=2  |      |            |         |         |               |             |                     |                    |  |         |         |       |   |     |           |                           |       |
|             |          |        |                   |         |       |                    |                                  |                 |                  |        |       | 43   | 54         | 613.32  |         |               |             |                     |                    |  | 1224.62 | 1224.66 | -0.03 | 0 | 42  | 0.0042108 | R.VLANPGNSQVAR.V          | 13.86 |
|             |          |        |                   |         |       |                    |                                  |                 |                  |        |       | 235  | 243        | 478.29  |         |               |             |                     |                    |  | 954.57  | 954.59  | -0.01 | 0 | 43  | 0.0035419 | R.VAALQNLVK.I             | 20.12 |
|             |          |        |                   |         |       |                    |                                  |                 |                  |        |       | 550  | 557        | 489.75  |         |               |             |                     |                    |  | 977.49  | 977.52  | -0.03 | 0 | 44  | 0.0030922 | K.TTLVIMER.L              | 17.16 |
| P11021      | 27%      | 997    | 16                | 72402   | 5.1   | P11021 GRP78_HUMAN | 78 kDa glucose-regulated protein | OS=Homo sapiens | GN=HSPA5         | PE=1   | SV=2  |      |            |         |         |               |             |                     |                    |  |         |         |       |   |     |           |                           |       |
|             |          |        |                   |         |       |                    |                                  |                 |                  |        |       | 47   | 60         | 519.26  |         |               |             |                     |                    |  | 1554.76 | 1554.79 | -0.02 | 1 | 62  | 4.57E-05  | K.NGRVEIHANDQGNR.I        | 13.88 |
|             |          |        |                   |         |       |                    |                                  |                 |                  |        |       | 50   | 60         | 614.81  |         |               |             |                     |                    |  | 1227.61 | 1227.62 | -0.01 | 0 | 70  | 9.04E-06  | R.VEIIANDQGNR.I           | 14.76 |
|             |          |        |                   |         |       |                    |                                  |                 |                  |        |       | 61   | 74         | 783.89  |         |               |             |                     |                    |  | 1565.76 | 1565.77 | -0.02 | 0 | 68  | 8.91E-06  | R.ITPSYVAFTPEGGER.L       | 20.64 |
|             |          |        |                   |         |       |                    |                                  |                 |                  |        |       | 82   | 96         | 839.4   |         |               |             |                     |                    |  | 1676.79 | 1676.8  | -0.01 | 0 | 107 | 1.34E-09  | K.NQLTSPNPENTVFDK.R       | 20.1  |
|             |          |        |                   |         |       |                    |                                  |                 |                  |        |       | 82   | 97         | 611.96  |         |               |             |                     |                    |  | 1832.85 | 1832.9  | -0.05 | 1 | 89  | 8.06E-08  | K.NQLTSPNPENTVFDK.R.L     | 19.57 |
|             |          |        |                   |         |       |                    |                                  |                 |                  |        |       | 124  | 138        | 535.61  |         |               |             |                     |                    |  | 1603.82 | 1603.86 | -0.04 | 0 | 67  | 1.43E-05  | K.TKPYIQVDIGGGQTK.T       | 19.61 |
|             |          |        |                   |         |       |                    |                                  |                 |                  |        |       | 186  | 197        | 617.31  |         |               |             |                     |                    |  | 1232.61 | 1232.62 | -0.01 | 0 | 44  | 0.0029427 | K.DAGTIAGLNVMR.I          | 20.01 |
|             |          |        |                   |         |       |                    |                                  |                 |                  |        |       | 198  | 214        | 605.99  |         |               |             |                     |                    |  | 1814.96 | 1814.99 | -0.03 | 1 | 89  | 6.45E-08  | R.IINEPTAAAIYGLDKR.E      | 20.95 |
|             |          |        |                   |         |       |                    |                                  |                 |                  |        |       | 325  | 336        | 510.24  |         |               |             |                     |                    |  | 1527.69 | 1527.74 | -0.05 | 1 | 50  | 0.0006892 | R.AKFEELNMDLFR.S          | 20.81 |
|             |          |        |                   |         |       |                    |                                  |                 |                  |        |       | 353  | 367        | 530.28  |         |               |             |                     |                    |  | 1587.81 | 1587.85 | -0.04 | 1 | 37  | 0.01494   | K.KSDIPELVGGSTR.I         | 20.5  |
|             |          |        |                   |         |       |                    |                                  |                 |                  |        |       | 371  | 376        | 364.73  |         |               |             |                     |                    |  | 727.44  | 727.46  | -0.02 | 0 | 39  | 0.0100392 | K.IQLLVK.E                | 13.66 |
|             |          |        |                   |         |       |                    |                                  |                 |                  |        |       | 448  | 464        | 918.96  |         |               |             |                     |                    |  | 1835.91 | 1835.93 | -0.02 | 0 | 98  | 1.09E-08  | K.SQIFSTASDNQPTVTIK.V     | 20.24 |
|             |          |        |                   |         |       |                    |                                  |                 |                  |        |       | 524  | 532        | 537.77  |         |               |             |                     |                    |  | 1073.52 | 1073.55 | -0.02 | 0 | 56  | 0.0001944 | K.ITITNDQNR.L             | 13.49 |
|             |          |        |                   |         |       |                    |                                  |                 |                  |        |       | 541  | 554        | 418.19  |         |               |             |                     |                    |  | 1668.72 | 1668.77 | -0.05 | 2 | 35  | 0.0199412 | R.MVNDAEKFEEDKK.L         | 13.53 |
|             |          |        |                   |         |       |                    |                                  |                 |                  |        |       | 620  | 633        | 551.99  |         |               |             |                     |                    |  | 1652.94 | 1652.97 | -0.03 | 2 | 53  | 0.0002885 | K.KKELEEIVQPIISK.L        | 20.06 |
| 622         | 633      | 699.4  | 1396.78           | 1396.78 | 0     | 0                  | 38                               | 0.012695        | K.ELEEIVQPIISK.L | 21.21  |       |      |            |         |         |               |             |                     |                    |  |         |         |       |   |     |           |                           |       |
| P26038      | 17%      | 610    | 14                | 67892   | 6.1   | P26038 MOES_HUMAN  | Moesin                           | OS=Homo sapiens | GN=MSN           | PE=1   | SV=3  |      |            |         |         |               |             |                     |                    |  |         |         |       |   |     |           |                           |       |
|             |          |        |                   |         |       |                    |                                  |                 |                  |        |       | 28   | 35         | 488.77  |         |               |             |                     |                    |  | 975.52  | 975.54  | -0.02 | 0 | 44  | 0.003133  | K.QLFDQVVK.T              | 20.28 |
|             |          |        |                   |         |       |                    |                                  |                 |                  |        |       | 101  | 107        | 447.77  |         |               |             |                     |                    |  | 893.52  | 893.54  | -0.02 | 0 | 33  | 0.0322266 | R.LFFLQVK.E               | 22.06 |
|             |          |        |                   |         |       |                    |                                  |                 |                  |        |       | 185  | 193        | 540.28  |         |               |             |                     |                    |  | 1078.54 | 1078.55 | -0.01 | 0 | 62  | 4.83E-05  | R.EDAVLEYLK.I             | 21.35 |
|             |          |        |                   |         |       |                    |                                  |                 |                  |        |       | 295  | 306        | 496.92  |         |               |             |                     |                    |  | 1487.73 | 1487.78 | -0.05 | 1 | 53  | 0.000345  | R.RKPDITVEQQMKA           | 12.48 |
|             |          |        |                   |         |       |                    |                                  |                 |                  |        |       | 296  | 306        | 444.88  |         |               |             |                     |                    |  | 1331.63 | 1331.68 | -0.05 | 0 | 42  | 0.0053082 | R.KPDITVEQQMKA            | 12.83 |
|             |          |        |                   |         |       |                    |                                  |                 |                  |        |       | 360  | 371        | 505.92  |         |               |             |                     |                    |  | 1514.74 | 1514.78 | -0.04 | 2 | 38  | 0.0104235 | K.KAQLELEEQTTR.A          | 12.44 |
|             |          |        |                   |         |       |                    |                                  |                 |                  |        |       | 361  | 370        | 616.3   |         |               |             |                     |                    |  | 1230.58 | 1230.58 | -0.01 | 0 | 35  | 0.0244704 | K.AQQUEEEQTR.R            | 13.09 |
|             |          |        |                   |         |       |                    |                                  |                 |                  |        |       | 401  | 408        | 444.24  |         |               |             |                     |                    |  | 886.47  | 886.49  | -0.02 | 0 | 35  | 0.0286628 | K.EALLQASR.D              | 14.98 |
|             |          |        |                   |         |       |                    |                                  |                 |                  |        |       | 428  | 435        | 482.24  |         |               |             |                     |                    |  | 962.46  | 962.49  | -0.02 | 0 | 45  | 0.002497  | R.ISQLEMAR.Q              | 13.44 |
|             |          |        |                   |         |       |                    |                                  |                 |                  |        |       | 449  | 458        | 603.78  |         |               |             |                     |                    |  | 1205.55 | 1205.56 | -0.01 | 0 | 71  | 5.60E-06  | K.AQMVQEDLEK.T            | 13.8  |
|             |          |        |                   |         |       |                    |                                  |                 |                  |        |       | 449  | 460        | 488.56  |         |               |             |                     |                    |  | 1462.67 | 1462.71 | -0.04 | 1 | 35  | 0.0236423 | K.AQMVQEDLEKTR.A          | 13.75 |
|             |          |        |                   |         |       |                    |                                  |                 |                  |        |       | 524  | 533        | 523.4   |         |               |             |                     |                    |  | 1044.79 | 1044.56 | 0.23  | 0 | 40  | 0.0061384 | K.ALTSSELANAR.D           | 18.43 |
|             |          |        |                   |         |       |                    |                                  |                 |                  |        |       | 524  | 537        | 502.25  |         |               |             |                     |                    |  | 1503.72 | 1503.75 | -0.03 | 1 | 37  | 0.0149882 | K.ALTSSELANARDESK.K       | 15.94 |
|             |          |        |                   |         |       |                    |                                  |                 |                  |        |       | 569  | 577        | 585.74  |         |               |             |                     |                    |  | 1169.47 | 1169.5  | -0.03 | 1 | 42  | 0.0043783 | K.QRIDEFESM.-             | 17.82 |
| P01876      | 10%      | 157    | 3                 | 38486   | 6.1   | P01876 IGHA1_HUMAN | Ig alpha-1 chain C region        | OS=Homo sapiens | GN=IGHA1         | PE=1   | SV=2  |      |            |         |         |               |             |                     |                    |  |         |         |       |   |     |           |                           |       |
|             |          |        |                   |         |       |                    |                                  |                 |                  |        |       | 154  | 168        | 770.86  |         |               |             |                     |                    |  | 1539.71 | 1539.72 | -0.01 | 0 | 39  | 0.0093864 | R.DASGVFTFTWTPSSGK.S      | 21.26 |
|             |          |        |                   |         |       |                    |                                  |                 |                  |        |       | 201  | 212        | 688.31  |         |               |             |                     |                    |  | 1374.61 | 1374.61 | 0     | 0 | 57  | 0.0001512 | K.TFTCTAAYPEK.T           | 17.03 |
|             |          |        |                   |         |       |                    |                                  |                 |                  |        |       | 264  | 273        | 607.31  |         |               |             |                     |                    |  | 1212.61 | 1212.63 | -0.01 | 0 | 61  | 5.17E-05  | R.WLQGSQELPR.E            | 19.97 |
| Q15942      | 7%       | 138    | 3                 | 62436   | 6.2   | Q15942 ZYX_HUMAN   | Zyxin                            | OS=Homo sapiens | GN=ZYX           | PE=1   | SV=1  |      |            |         |         |               |             |                     |                    |  |         |         |       |   |     |           |                           |       |
|             |          |        |                   |         |       |                    |                                  |                 |                  |        |       | 36   | 54         | 663.66  |         |               |             |                     |                    |  | 1987.95 | 1987.99 | -0.04 | 0 | 39  | 0.0083397 | K.VNPFRRPGDSEPPAPGAQR.A   | 19.13 |
|             |          |        |                   |         |       |                    |                                  |                 |                  |        |       | 254  | 265        | 538.77  |         |               |             |                     |                    |  | 1075.53 | 1075.57 | -0.03 | 0 | 57  | 0.0001514 | R.GPPASSPAPAK.F           | 12.61 |
|             |          |        |                   |         |       |                    |                                  |                 |                  |        |       | 376  | 386        | 630.31  |         |               |             |                     |                    |  | 1258.61 | 1258.61 | 0     | 0 | 43  | 0.0036326 | R.QNVAVNELCGR.C           | 18.34 |
| Q13310      | 4%       | 69     | 2                 | 71080   | 9.3   | Q13310 PABP4_HUMAN | Polyadenylate-binding protein 4  | OS=Homo sapiens | GN=PABPC4        | PE=1   | SV=1  |      |            |         |         |               |             |                     |                    |  |         |         |       |   |     |           |                           |       |
|             |          |        |                   |         |       |                    |                                  |                 |                  |        |       | 68   | 78         | 641.82  |         |               |             |                     |                    |  | 1281.63 | 1281.63 | 0     | 0 | 59  | 7.56E-05  | R.ALDTMNFVDVIG.K          | 20.73 |
|             |          |        |                   |         |       |                    |                                  |                 |                  |        |       | 313  | 324        | 635.81  |         |               |             |                     |                    |  | 1269.61 | 1269.62 | -0.02 | 0 | 38  | 0.0120431 | K.EFSPFGSITSAK.V          | 21.39 |
| P13796      | 20%      | 590    | 11                | 70815   | 5.2   | P13796 PLSL_HUMAN  | Plastin-2                        | OS=Homo sapiens | GN=LCP1          | PE=1   | SV=5  |      |            |         |         |               |             |                     |                    |  |         |         |       |   |     |           |                           |       |
|             |          |        |                   |         |       |                    |                                  |                 |                  |        |       | 4    | 15         | 707.79  |         |               |             |                     |                    |  | 1413.56 | 1413.58 | -0.02 | 0 | 45  | 0.0025465 | R.GSVSDEEMMELR.E          | 14.78 |
|             |          |        |                   |         |       |                    |                                  |                 |                  |        |       | 133  | 141        | 545.23  |         |               |             |                     |                    |  | 1088.44 | 1088.46 | -0.02 | 0 | 47  | 0.001766  | K.ALENDPCR.H              | 12.86 |
|             |          |        |                   |         |       |                    |                                  |                 |                  |        |       | 166  | 178        | 759.86  |         |               |             |                     |                    |  | 1517.71 | 1517.74 | -0.03 | 0 | 52  | 0.0004418 | K.MINLSVPTIDER.T          | 20.78 |
|             |          |        |                   |         |       |                    |                                  |                 |                  |        |       | 245  | 253        | 506.8   |         |               |             |                     |                    |  | 1011.59 | 1011.61 | -0.01 | 0 | 48  | 0.0012217 | R.NEALIALLR.E             | 22    |
|             |          |        |                   |         |       |                    |                                  |                 |                  |        |       | 254  | 263        | 583.76  |         |               |             |                     |                    |  | 1165.51 | 1165.52 | -0.01 | 0 | 61  | 5.92E-05  | R.EGESLEDLMK.L            | 19.24 |
| 286         | 294      | 497.76 | 993.5             | 993.51  | -0.01 | 0                  | 65                               | 2.23E-05        | K.IGNFSTDIK.D    | 19.59  |       |      |            |         |         |               |             |                     |                    |  |         |         |       |   |     |           |                           |       |

| accession # | coverage | score | distinct peptides | mass  | pl  | start AA | end AA      | m/z obs                                                                  | M obs           | M calc    | delta | miss | pept score | exp val   | peptide                | modifications   | retent time | Strongest gel slice | # gel slices found |
|-------------|----------|-------|-------------------|-------|-----|----------|-------------|--------------------------------------------------------------------------|-----------------|-----------|-------|------|------------|-----------|------------------------|-----------------|-------------|---------------------|--------------------|
|             |          |       |                   |       |     | 334      | 343         | 626.27                                                                   | 1250.52         | 1250.54   | -0.02 | 0    | 54         | 0.0002709 | R.AECLMQAER.L          | Oxidation (M)   | 13.08       |                     |                    |
|             |          |       |                   |       |     | 348      | 357         | 568.3                                                                    | 1134.58         | 1134.6    | -0.02 | 0    | 54         | 0.0002792 | R.QFVTATDVVR.G         |                 | 19.73       |                     |                    |
|             |          |       |                   |       |     | 473      | 488         | 838.41                                                                   | 1674.8          | 1674.83   | -0.03 | 0    | 67         | 1.17E-05  | K.FSLVIGGGQDLNEGNR.T   |                 | 21.43       |                     |                    |
|             |          |       |                   |       |     | 571      | 584         | 539.91                                                                   | 1616.71         | 1616.76   | -0.06 | 1    | 48         | 0.0010467 | K.TENLNDDKLNNAK.Y      |                 | 13.25       |                     |                    |
|             |          |       |                   |       |     | 611      | 622         | 718.32                                                                   | 1434.62         | 1434.64   | -0.02 | 0    | 50         | 0.0006474 | K.MVMTVFLMLGK.G        | 3 Oxidation (M) | 20.86       |                     |                    |
| accession # | coverage | score | distinct peptides | mass  | pl  | start AA | end AA      | m/z obs                                                                  | M obs           | M calc    | delta | miss | pept score | exp val   | peptide                | modifications   | retent time | Strongest gel slice | # gel slices found |
| P11142      | 19%      | 680   | 11                | 71082 | 5.4 | P11142   | HSP7C_HUMAN | Heat shock cognate 71 kDa protein                                        | OS=Homo sapiens | GN=HSPA8  | PE=1  | SV=1 |            |           |                        |                 |             | 7                   | 2                  |
|             |          |       |                   |       |     | 26       | 36          | 614.81                                                                   | 1227.6          | 1227.62   | -0.02 | 0    | 67         | 1.48E-05  | K.VEIIANDQGGR.T        |                 | 14.6        |                     |                    |
|             |          |       |                   |       |     | 37       | 49          | 744.35                                                                   | 1486.68         | 1486.69   | -0.02 | 0    | 65         | 2.41E-05  | R.TTSPVAFDTER.L        |                 | 20.3        |                     |                    |
|             |          |       |                   |       |     | 57       | 71          | 833.38                                                                   | 1664.74         | 1664.78   | -0.04 | 0    | 87         | 1.36E-07  | K.NQVAMNPTNVFDAK.R     | Oxidation (M)   | 19.51       |                     |                    |
|             |          |       |                   |       |     | 57       | 72          | 607.94                                                                   | 1820.8          | 1820.88   | -0.09 | 1    | 56         | 0.0001643 | K.NQVAMNPTNVFDAK.R     | Oxidation (M)   | 17.46       |                     |                    |
|             |          |       |                   |       |     | 78       | 88          | 635.77                                                                   | 1269.53         | 1269.55   | -0.03 | 0    | 60         | 7.88E-05  | R.FDDAVVQSDMK.H        | Oxidation (M)   | 15.43       |                     |                    |
|             |          |       |                   |       |     | 160      | 171         | 600.32                                                                   | 1198.63         | 1198.67   | -0.04 | 0    | 65         | 2.59E-05  | K.DAGTIAGLNVLR.I       |                 | 21.39       |                     |                    |
|             |          |       |                   |       |     | 172      | 188         | 596.65                                                                   | 1786.94         | 1786.98   | -0.04 | 1    | 79         | 7.21E-07  | R.IINEPTAAIAYGLDKK.V   |                 | 20.82       |                     |                    |
|             |          |       |                   |       |     | 221      | 236         | 564.57                                                                   | 1690.7          | 1690.72   | -0.02 | 0    | 35         | 0.0227628 | K.STAGDTHLGGEDFDNR.M   |                 | 15.38       |                     |                    |
|             |          |       |                   |       |     | 302      | 311         | 627.31                                                                   | 1252.6          | 1252.61   | -0.01 | 0    | 49         | 0.0007898 | R.FEELNADLFR.G         |                 | 21.78       |                     |                    |
|             |          |       |                   |       |     | 349      | 357         | 541.28                                                                   | 1080.54         | 1080.56   | -0.02 | 0    | 52         | 0.000435  | K.LLQDFFNKG.E          |                 | 21.56       |                     |                    |
|             |          |       |                   |       |     | 452      | 458         | 387.2                                                                    | 772.39          | 772.41    | -0.02 | 0    | 34         | 0.0375324 | K.DNNLLGK.F            |                 | 14.82       |                     |                    |
| accession # | coverage | score | distinct peptides | mass  | pl  | start AA | end AA      | m/z obs                                                                  | M obs           | M calc    | delta | miss | pept score | exp val   | peptide                | modifications   | retent time | Strongest gel slice | # gel slices found |
| P08107      | 12%      | 320   | 6                 | 70294 | 5.5 | P08107   | HSP71_HUMAN | Heat shock 70 kDa protein 1                                              | OS=Homo sapiens | GN=HSPA1A | PE=1  | SV=5 |            |           |                        |                 |             | 7                   | 1                  |
|             |          |       |                   |       |     | 26       | 36          | 614.81                                                                   | 1227.6          | 1227.62   | -0.02 | 0    | 67         | 1.48E-05  | K.VEIIANDQGGR.T        |                 | 14.6        |                     |                    |
|             |          |       |                   |       |     | 37       | 49          | 744.35                                                                   | 1486.68         | 1486.69   | -0.02 | 0    | 65         | 2.41E-05  | R.TTSPVAFDTER.L        |                 | 20.3        |                     |                    |
|             |          |       |                   |       |     | 57       | 71          | 829.92                                                                   | 1657.82         | 1657.84   | -0.02 | 0    | 60         | 5.96E-05  | K.NQVAMNPTNVFDAK.R     |                 | 20.38       |                     |                    |
|             |          |       |                   |       |     | 78       | 88          | 619.78                                                                   | 1237.54         | 1237.56   | -0.02 | 0    | 36         | 0.0159993 | K.FGDPVAVQSDMK.H       | Oxidation (M)   | 15.86       |                     |                    |
|             |          |       |                   |       |     | 221      | 236         | 559.25                                                                   | 1674.73         | 1674.72   | 0.01  | 0    | 43         | 0.0034816 | K.ATAGDTHLGGEDFDNR.L   |                 | 15.69       |                     |                    |
|             |          |       |                   |       |     | 349      | 357         | 555.28                                                                   | 1108.55         | 1108.57   | -0.01 | 0    | 49         | 0.0007665 | K.LLQDFFNGR.D          |                 | 21.7        |                     |                    |
| accession # | coverage | score | distinct peptides | mass  | pl  | start AA | end AA      | m/z obs                                                                  | M obs           | M calc    | delta | miss | pept score | exp val   | peptide                | modifications   | retent time | Strongest gel slice | # gel slices found |
| P29966      | 10%      | 114   | 2                 | 31707 | 4.5 | P29966   | MARCS_HUMAN | Myristoylated alanine-rich C-kinase substrate                            | OS=Homo sapiens | GN=MARCKS | PE=1  | SV=4 |            |           |                        |                 |             | 7                   | 1                  |
|             |          |       |                   |       |     | 12       | 30          | 595.62                                                                   | 1783.83         | 1783.87   | -0.04 | 0    | 54         | 0.0002324 | K.GEAAERPGEEAAVASSPSKA |                 | 13.03       |                     |                    |
|             |          |       |                   |       |     | 138      | 152         | 750.83                                                                   | 1499.65         | 1499.67   | -0.02 | 0    | 60         | 7.16E-05  | K.AEDGATPSPSNETPK.K    |                 | 12.95       |                     |                    |
| accession # | coverage | score | distinct peptides | mass  | pl  | start AA | end AA      | m/z obs                                                                  | M obs           | M calc    | delta | miss | pept score | exp val   | peptide                | modifications   | retent time | Strongest gel slice | # gel slices found |
| P08133      | 10%      | 227   | 6                 | 76168 | 5.4 | P08133   | ANXA6_HUMAN | Annexin A6                                                               | OS=Homo sapiens | GN=ANXA6  | PE=1  | SV=3 |            |           |                        |                 |             | 7                   | 1                  |
|             |          |       |                   |       |     | 103      | 113         | 553.28                                                                   | 1104.55         | 1104.53   | 0.02  | 0    | 49         | 0.0011452 | K.DAISGIGTDEK.C        |                 | 16.64       |                     |                    |
|             |          |       |                   |       |     | 157      | 166         | 573.33                                                                   | 1144.64         | 1144.66   | -0.03 | 0    | 36         | 0.0200072 | K.MLVVLLQGTR.E         | Oxidation (M)   | 20.91       |                     |                    |
|             |          |       |                   |       |     | 221      | 231         | 391.54                                                                   | 1171.6          | 1171.66   | -0.05 | 0    | 43         | 0.0039697 | K.TTGKPIEAIR.G         |                 | 13.34       |                     |                    |
|             |          |       |                   |       |     | 251      | 259         | 550.24                                                                   | 1098.46         | 1098.5    | -0.03 | 0    | 35         | 0.023531  | R.STPEYFAER.L          |                 | 18.98       |                     |                    |
|             |          |       |                   |       |     | 355      | 370         | 563.26                                                                   | 1686.74         | 1686.8    | -0.05 | 0    | 31         | 0.0467612 | K.GTVRPANDFNPDADAK.A   |                 | 14.34       |                     |                    |
|             |          |       |                   |       |     | 547      | 554         | 529.26                                                                   | 1056.51         | 1056.51   | 0     | 0    | 33         | 0.0388716 | R.FMTILCTR.S           | Oxidation (M)   | 20.12       |                     |                    |
| accession # | coverage | score | distinct peptides | mass  | pl  | start AA | end AA      | m/z obs                                                                  | M obs           | M calc    | delta | miss | pept score | exp val   | peptide                | modifications   | retent time | Strongest gel slice | # gel slices found |
| P17066      | 8%       | 227   | 4                 | 71440 | 5.8 | P17066   | HSP76_HUMAN | Heat shock 70 kDa protein 6                                              | OS=Homo sapiens | GN=HSPA6  | PE=1  | SV=2 |            |           |                        |                 |             | 7                   | 2                  |
|             |          |       |                   |       |     | 28       | 38          | 614.81                                                                   | 1227.6          | 1227.62   | -0.02 | 0    | 67         | 1.48E-05  | R.VEILANDQGGR.T        |                 | 14.6        |                     |                    |
|             |          |       |                   |       |     | 39       | 51          | 744.35                                                                   | 1486.68         | 1486.69   | -0.02 | 0    | 65         | 2.41E-05  | R.TTSPVAFDTER.L        |                 | 20.3        |                     |                    |
|             |          |       |                   |       |     | 223      | 238         | 559.25                                                                   | 1674.73         | 1674.72   | 0.01  | 0    | 43         | 0.0034816 | K.ATAGDTHLGGEDFDNR.L   |                 | 15.69       |                     |                    |
|             |          |       |                   |       |     | 351      | 359         | 541.28                                                                   | 1080.54         | 1080.56   | -0.02 | 0    | 52         | 0.000435  | K.LLQDFFNKG.E          |                 | 21.56       |                     |                    |
| accession # | coverage | score | distinct peptides | mass  | pl  | start AA | end AA      | m/z obs                                                                  | M obs           | M calc    | delta | miss | pept score | exp val   | peptide                | modifications   | retent time | Strongest gel slice | # gel slices found |
| P04062      | 3%       | 75    | 2                 | 60134 | 7.3 | P04062   | GLCM_HUMAN  | Glucosylceramidase                                                       | OS=Homo sapiens | GN=GBA    | PE=1  | SV=3 |            |           |                        |                 |             | 7                   | 1                  |
|             |          |       |                   |       |     | 317      | 324         | 510.25                                                                   | 1018.49         | 1018.51   | -0.02 | 0    | 39         | 0.0099865 | R.LLMLDDQR.L           | Oxidation (M)   | 19.64       |                     |                    |
|             |          |       |                   |       |     | 333      | 342         | 521.78                                                                   | 1041.55         | 1041.57   | -0.02 | 0    | 36         | 0.0206613 | K.VVLTDPAAK.Y          |                 | 15.9        |                     |                    |
| accession # | coverage | score | distinct peptides | mass  | pl  | start AA | end AA      | m/z obs                                                                  | M obs           | M calc    | delta | miss | pept score | exp val   | peptide                | modifications   | retent time | Strongest gel slice | # gel slices found |
| P04843      | 3%       | 89    | 2                 | 68641 | 6   | P04843   | RPN1_HUMAN  | Dolichyl-diphosphooligosaccharide--protein glycosyltransferase subunit 1 | OS=Homo sapiens | GN=RPN1   | PE=1  | SV=1 |            |           |                        |                 |             | 7                   | 1                  |
|             |          |       |                   |       |     | 117      | 126         | 490.78                                                                   | 979.54          | 979.57    | -0.03 | 0    | 38         | 0.0106195 | K.LPVALDPGAK.I         |                 | 19.81       |                     |                    |
|             |          |       |                   |       |     | 269      | 278         | 530.26                                                                   | 1058.51         | 1058.54   | -0.03 | 0    | 50         | 0.0007329 | R.QPDSGISSIR.S         |                 | 14.86       |                     |                    |
| accession # | coverage | score | distinct peptides | mass  | pl  | start AA | end AA      | m/z obs                                                                  | M obs           | M calc    | delta | miss | pept score | exp val   | peptide                | modifications   | retent time | Strongest gel slice | # gel slices found |
| P40227      | 14%      | 367   | 7                 | 58444 | 6.2 | P40227   | TCPZ_HUMAN  | T-complex protein 1 subunit zeta                                         | OS=Homo sapiens | GN=CCT6A  | PE=1  | SV=3 |            |           |                        |                 |             | 8                   | 1                  |
|             |          |       |                   |       |     | 46       | 55          | 503.75                                                                   | 1005.48         | 1005.52   | -0.03 | 0    | 36         | 0.0218625 | K.MLVSGAGDIK.L         | Oxidation (M)   | 14.9        |                     |                    |
|             |          |       |                   |       |     | 118      | 127         | 539.78                                                                   | 1077.54         | 1077.57   | -0.03 | 0    | 50         | 0.000831  | R.IITEGFEAAK.E         |                 | 19.46       |                     |                    |
|             |          |       |                   |       |     | 130      | 138         | 538.79                                                                   | 1075.57         | 1075.59   | -0.03 | 0    | 53         | 0.0004278 | K.ALQFLIEVK.V          |                 | 21.22       |                     |                    |
|             |          |       |                   |       |     | 146      | 153         | 458.75                                                                   | 915.49          | 915.5     | -0.01 | 0    | 40         | 0.0099333 | R.ETLIDVAR.T           |                 | 20.03       |                     |                    |
|             |          |       |                   |       |     | 200      | 208         | 511.26                                                                   | 1020.51         | 1020.51   | 0     | 0    | 61         | 5.84E-05  | K.SETDTSLR.G           |                 | 15.63       |                     |                    |
|             |          |       |                   |       |     | 296      | 307         | 631.83                                                                   | 1261.64         | 1261.66   | -0.02 | 0    | 66         | 1.87E-05  | K.GIDPFSLDALSKE        |                 | 22.27       |                     |                    |
|             |          |       |                   |       |     | 450      | 465         | 881.47                                                                   | 1760.92         | 1760.93   | -0.01 | 0    | 62         | 3.62E-05  | K.VLAQNSGFDLQETLVK.I   |                 | 21.31       |                     |                    |
| accession # | coverage | score | distinct peptides | mass  | pl  | start AA | end AA      | m/z obs                                                                  | M obs           | M calc    | delta | miss | pept score | exp val   | peptide                | modifications   | retent time | Strongest gel slice | # gel slices found |
| P49368      | 11%      | 304   | 6                 | 61066 | 6.1 | P49368   | TCPG_HUMAN  | T-complex protein 1 subunit gamma                                        | OS=Homo sapiens | GN=CCT3   | PE=1  | SV=4 |            |           |                        |                 |             | 8                   | 1                  |
|             |          |       |                   |       |     | 129      | 138         | 561.78                                                                   | 1121.54         | 1121.56   | -0.02 | 0    | 49         | 0.0008507 | K.ALDDMISTLK.K         | Oxidation (M)   | 19.9        |                     |                    |
|             |          |       |                   |       |     | 238      | 248         | 640.35                                                                   | 1278.69         | 1278.71   | -0.02 | 0    | 64         | 2.95E-05  | R.IVLLDSSLEYK.K        |                 | 21.36       |                     |                    |
|             |          |       |                   |       |     | 307      | 313         | 379.71                                                                   | 757.41          | 757.44    | -0.03 | 0    | 37         | 0.0226395 | R.ANITAIR.R            |                 | 14.33       |                     |                    |
|             |          |       |                   |       |     | 390      | 399         | 625.77                                                                   | 1249.52         | 1249.55   | -0.03 | 0    | 49         | 0.0009825 | R.NLQDAMQVCR.N         | Oxidation (M)   | 13.81       |                     |                    |
|             |          |       |                   |       |     | 439      | 449         | 583.84                                                                   | 1165.66         | 1165.68   | -0.02 | 0    | 63         | 3.63E-05  | R.AVAQALEVIPR.T        |                 | 20.61       |                     |                    |
|             |          |       |                   |       |     | 450      | 461         | 667.32                                                                   | 1332.63         | 1332.68   | -0.05 | 0    | 45         | 0.0021827 | R.TLIQNCGASTIR.L       |                 | 17.67       |                     |                    |

| accession #                                                          | coverage | score | distinct peptides | mass                                                         | pl  | start AA | end AA      | m/z obs                                  | M obs           | M calc   | delta | miss | pept score | exp val | peptide | modifications | retent time | slice | found |  |                                        |       |   |   |                                                                          |               |              |  |
|----------------------------------------------------------------------|----------|-------|-------------------|--------------------------------------------------------------|-----|----------|-------------|------------------------------------------|-----------------|----------|-------|------|------------|---------|---------|---------------|-------------|-------|-------|--|----------------------------------------|-------|---|---|--------------------------------------------------------------------------|---------------|--------------|--|
| P48643                                                               | 10%      | 255   | 6                 | 60089                                                        | 5.5 | P48643   | TCPE_HUMAN  | T-complex protein 1 subunit epsilon      | OS=Homo sapiens | GN=CCT5  | PE=1  | SV=1 |            |         |         |               |             |       |       |  |                                        |       |   |   |                                                                          |               |              |  |
|                                                                      |          |       |                   |                                                              |     |          |             |                                          |                 |          |       |      |            |         |         |               |             |       |       |  | Oxidation (M)                          | 19.86 | 8 | 1 |                                                                          |               |              |  |
|                                                                      |          |       |                   |                                                              |     |          |             |                                          |                 |          |       |      |            |         |         |               |             |       |       |  |                                        |       |   |   | 28 35 445.74 889.47 889.49 -0.02 0 36 0.0243507 R.LMGLEALK.S             |               |              |  |
|                                                                      |          |       |                   |                                                              |     |          |             |                                          |                 |          |       |      |            |         |         |               |             |       |       |  |                                        |       |   |   | 133 142 547.25 1092.49 1092.52 -0.03 0 63 3.48E-05 R.IADGYEQAAR.V        |               |              |  |
|                                                                      |          |       |                   |                                                              |     |          |             |                                          |                 |          |       |      |            |         |         |               |             |       |       |  |                                        |       |   |   | 203 214 464.57 1390.7 1390.73 -0.04 1 43 0.0034756 R.DVDFELIKVEGK.V      |               |              |  |
|                                                                      |          |       |                   |                                                              |     |          |             |                                          |                 |          |       |      |            |         |         |               |             |       |       |  |                                        |       |   |   | 345 352 462.73 923.45 923.46 -0.01 0 45 0.0020603 R.FSELTAEK.L           |               |              |  |
| Oxidation (M)                                                        | 20.56    | 8     | 1                 |                                                              |     |          |             |                                          |                 |          |       |      |            |         |         |               |             |       |       |  |                                        |       |   |   |                                                                          |               |              |  |
|                                                                      |          |       |                   | 382 388 410.25 818.48 818.5 -0.02 0 35 0.0291021 R.AVTIFIR.G |     |          |             |                                          |                 |          |       |      |            |         |         |               |             |       |       |  |                                        |       |   |   |                                                                          |               |              |  |
| 515 525 645.83 1289.65 1289.68 -0.03 0 37 0.0152766 K.QQISLATQMVR.M  |          |       |                   |                                                              |     |          |             |                                          |                 |          |       |      |            |         |         |               |             |       |       |  |                                        |       |   |   |                                                                          |               |              |  |
| P10809                                                               | 9%       | 276   | 5                 | 61187                                                        | 5.7 | P10809   | CH60_HUMAN  | 60 kDa heat shock protein, mitochondrial | OS=Homo sapiens | GN=HSPD1 | PE=1  | SV=2 |            |         |         |               |             |       |       |  |                                        |       |   |   |                                                                          |               |              |  |
|                                                                      |          |       |                   |                                                              |     |          |             |                                          |                 |          |       |      |            |         |         |               |             |       |       |  | Oxidation (M)                          | 19.02 | 8 | 1 |                                                                          |               |              |  |
|                                                                      |          |       |                   |                                                              |     |          |             |                                          |                 |          |       |      |            |         |         |               |             |       |       |  |                                        |       |   |   | 397 405 451.26 900.51 900.53 -0.02 0 34 0.0360729 K.LSDGVAVLK.V          |               |              |  |
|                                                                      |          |       |                   |                                                              |     |          |             |                                          |                 |          |       |      |            |         |         |               |             |       |       |  |                                        |       |   |   | 406 417 617.29 1232.56 1232.59 -0.03 0 73 3.61E-06 K.VGGTSDVEVNEK.K      |               |              |  |
|                                                                      |          |       |                   |                                                              |     |          |             |                                          |                 |          |       |      |            |         |         |               |             |       |       |  |                                        |       |   |   | 421 429 480.74 959.47 959.5 -0.03 0 37 0.0200928 R.VTDALNATR.A           |               |              |  |
|                                                                      |          |       |                   |                                                              |     |          |             |                                          |                 |          |       |      |            |         |         |               |             |       |       |  |                                        |       |   |   | 471 481 401.56 1201.65 1201.71 -0.06 1 41 0.0060385 R.TLKIPAMTIK.N       |               |              |  |
| 482 493 608.33 1214.64 1214.65 -0.01 0 58 0.0001201 K.NAGVEGSLIVEK.I |          |       |                   |                                                              |     |          |             |                                          |                 |          |       |      |            |         |         |               |             |       |       |  |                                        |       |   |   |                                                                          |               |              |  |
| P54577                                                               | 8%       | 206   | 4                 | 59448                                                        | 6.6 | P54577   | SYUC_HUMAN  | Tyrosyl-tRNA synthetase, cytoplasmic     | OS=Homo sapiens | GN=YARS  | PE=1  | SV=4 |            |         |         |               |             |       |       |  |                                        |       |   |   |                                                                          |               |              |  |
|                                                                      |          |       |                   |                                                              |     |          |             |                                          |                 |          |       |      |            |         |         |               |             |       |       |  | Oxidation (M)                          | 20.52 | 8 | 1 |                                                                          |               |              |  |
|                                                                      |          |       |                   |                                                              |     |          |             |                                          |                 |          |       |      |            |         |         |               |             |       |       |  |                                        |       |   |   | 103 114 651.84 1301.67 1301.69 -0.02 0 50 0.0007473 K.AMLESIGVPLEK.L     |               |              |  |
|                                                                      |          |       |                   |                                                              |     |          |             |                                          |                 |          |       |      |            |         |         |               |             |       |       |  |                                        |       |   |   | 311 319 487.26 972.5 972.52 -0.02 0 35 0.0307427 K.NSVEVALNK.L           |               |              |  |
|                                                                      |          |       |                   |                                                              |     |          |             |                                          |                 |          |       |      |            |         |         |               |             |       |       |  |                                        |       |   |   | 357 367 628.8 1255.58 1255.6 -0.03 0 45 0.0024319 K.NSEPEEIVPSR.L        |               |              |  |
|                                                                      |          |       |                   |                                                              |     |          |             |                                          |                 |          |       |      |            |         |         |               |             |       |       |  |                                        |       |   |   | 392 400 493.24 984.47 984.49 -0.02 0 46 0.0021007 K.IDVGEAEPR.T          |               |              |  |
| O75083                                                               | 6%       | 134   | 4                 | 66836                                                        | 6.2 | O75083   | WDR1_HUMAN  | WD repeat-containing protein 1           | OS=Homo sapiens | GN=WDR1  | PE=1  | SV=4 |            |         |         |               |             |       |       |  |                                        |       |   |   |                                                                          |               |              |  |
|                                                                      |          |       |                   |                                                              |     |          |             |                                          |                 |          |       |      |            |         |         |               |             |       |       |  | Oxidation (M)                          | 20.3  | 8 | 1 |                                                                          |               |              |  |
|                                                                      |          |       |                   |                                                              |     |          |             |                                          |                 |          |       |      |            |         |         |               |             |       |       |  |                                        |       |   |   | 8 17 573.31 1144.6 1144.62 -0.02 0 32 0.0482154 K.VFASLPQVER.G           |               |              |  |
|                                                                      |          |       |                   |                                                              |     |          |             |                                          |                 |          |       |      |            |         |         |               |             |       |       |  |                                        |       |   |   | 29 38 564.28 1126.54 1126.54 0 0 35 0.0236504 K.GNNFLYTNGK.C             |               |              |  |
|                                                                      |          |       |                   |                                                              |     |          |             |                                          |                 |          |       |      |            |         |         |               |             |       |       |  |                                        |       |   |   | 117 124 400.72 799.43 799.46 -0.02 0 33 0.048019 R.IAVVGEGR.E            |               |              |  |
|                                                                      |          |       |                   |                                                              |     |          |             |                                          |                 |          |       |      |            |         |         |               |             |       |       |  |                                        |       |   |   | 148 155 444.25 886.49 886.51 -0.03 0 34 0.035509 K.VINSVDIK.Q            |               |              |  |
| P17987                                                               | 6%       | 139   | 3                 | 60819                                                        | 5.8 | P17987   | TCPA_HUMAN  | T-complex protein 1 subunit alpha        | OS=Homo sapiens | GN=CCT1  | PE=1  | SV=1 |            |         |         |               |             |       |       |  |                                        |       |   |   |                                                                          |               |              |  |
|                                                                      |          |       |                   |                                                              |     |          |             |                                          |                 |          |       |      |            |         |         |               |             |       |       |  | Acetyl (Protein N-term); Oxidation (M) | 22.75 | 8 | 1 |                                                                          |               |              |  |
|                                                                      |          |       |                   |                                                              |     |          |             |                                          |                 |          |       |      |            |         |         |               |             |       |       |  |                                        |       |   |   | 1 11 633.33 1264.64 1264.68 0.07 0 52 0.0004418 -.MEGPLSVFGDR.S          |               |              |  |
|                                                                      |          |       |                   |                                                              |     |          |             |                                          |                 |          |       |      |            |         |         |               |             |       |       |  |                                        |       |   |   | 434 443 574.3 1146.59 1146.6 -0.02 0 38 0.013321 R.EQLAIEFAR.S           |               |              |  |
|                                                                      |          |       |                   |                                                              |     |          |             |                                          |                 |          |       |      |            |         |         |               |             |       |       |  |                                        |       |   |   | 500 510 594.82 1187.63 1187.66 -0.02 0 50 0.0008786 K.QAGVFPEITVK.V      |               |              |  |
|                                                                      |          |       |                   |                                                              |     |          |             |                                          |                 |          |       |      |            |         |         |               |             |       |       |  |                                        |       |   |   |                                                                          | 20.21         |              |  |
| P23141                                                               | 3%       | 97    | 2                 | 62766                                                        | 6.2 | P23141   | EST1_HUMAN  | Liver carboxylesterase 1                 | OS=Homo sapiens | GN=CES1  | PE=1  | SV=2 |            |         |         |               |             |       |       |  |                                        |       |   |   |                                                                          |               |              |  |
|                                                                      |          |       |                   |                                                              |     |          |             |                                          |                 |          |       |      |            |         |         |               |             |       |       |  | Oxidation (M)                          | 13.76 | 8 | 1 |                                                                          |               |              |  |
|                                                                      |          |       |                   |                                                              |     |          |             |                                          |                 |          |       |      |            |         |         |               |             |       |       |  |                                        |       |   |   | 331 339 536.75 1071.49 1071.52 -0.03 0 50 0.0010693 K.TPEELQAER.N        |               |              |  |
|                                                                      |          |       |                   |                                                              |     |          |             |                                          |                 |          |       |      |            |         |         |               |             |       |       |  |                                        |       |   |   | 483 491 510.23 1018.44 1018.46 -0.02 0 47 0.0017395 K.EGASEEIR.L         |               |              |  |
|                                                                      |          |       |                   |                                                              |     |          |             |                                          |                 |          |       |      |            |         |         |               |             |       |       |  |                                        |       |   |   |                                                                          | 13.15         |              |  |
|                                                                      |          |       |                   |                                                              |     |          |             |                                          |                 |          |       |      |            |         |         |               |             |       |       |  |                                        |       |   |   |                                                                          | Strongest gel | # gel slices |  |
|                                                                      | found    |       |                   |                                                              |     |          |             |                                          |                 |          |       |      |            |         |         |               |             |       |       |  |                                        |       |   |   |                                                                          |               |              |  |
| P07237                                                               | 23%      | 594   | 11                | 57480                                                        | 4.8 | P07237   | PDIA1_HUMAN | Protein disulfide-isomerase              | OS=Homo sapiens | GN=P4HB  | PE=1  | SV=3 |            |         |         |               |             |       |       |  |                                        |       |   |   |                                                                          |               |              |  |
|                                                                      |          |       |                   |                                                              |     |          |             |                                          |                 |          |       |      |            |         |         |               |             |       |       |  | Oxidation (M)                          | 12.74 | 9 | 1 |                                                                          |               |              |  |
|                                                                      |          |       |                   |                                                              |     |          |             |                                          |                 |          |       |      |            |         |         |               |             |       |       |  |                                        |       |   |   | 70 78 501.77 1001.52 1001.55 -0.03 1 36 0.0222668 K.LKAESEIR.L           |               |              |  |
|                                                                      |          |       |                   |                                                              |     |          |             |                                          |                 |          |       |      |            |         |         |               |             |       |       |  |                                        |       |   |   | 82 97 890.91 1779.81 1779.83 -0.02 0 95 2.10E-08 K.VDATEESDLAQQYVGR.G    |               |              |  |
|                                                                      |          |       |                   |                                                              |     |          |             |                                          |                 |          |       |      |            |         |         |               |             |       |       |  |                                        |       |   |   | 201 207 389.22 776.42 776.44 -0.02 0 45 0.0029025 K.DGVVLFK.K            |               |              |  |
|                                                                      |          |       |                   |                                                              |     |          |             |                                          |                 |          |       |      |            |         |         |               |             |       |       |  |                                        |       |   |   | 214 222 519.24 1036.46 1036.48 -0.02 0 36 0.0153077 R.NNFEGEVTK.E        |               |              |  |
|                                                                      |          |       |                   |                                                              |     |          |             |                                          |                 |          |       |      |            |         |         |               |             |       |       |  |                                        |       |   |   | 277 283 377.18 752.35 752.37 -0.02 0 34 0.0206801 K.TAAESFK.G            |               |              |  |
|                                                                      |          |       |                   |                                                              |     |          |             |                                          |                 |          |       |      |            |         |         |               |             |       |       |  |                                        |       |   |   | 286 300 611.95 1832.84 1832.91 -0.07 0 48 0.0008985 K.IILFIDSDHTDNQR.I   |               |              |  |
|                                                                      |          |       |                   |                                                              |     |          |             |                                          |                 |          |       |      |            |         |         |               |             |       |       |  |                                        |       |   |   | 301 308 483.78 965.54 965.56 -0.02 0 40 0.0072177 R.ILEFFGLK.K           |               |              |  |
|                                                                      |          |       |                   |                                                              |     |          |             |                                          |                 |          |       |      |            |         |         |               |             |       |       |  |                                        |       |   |   | 317 326 611.81 1221.62 1221.62 -0.02 0 49 0.0010114 R.LITLEEEMTK.Y       |               |              |  |
|                                                                      |          |       |                   |                                                              |     |          |             |                                          |                 |          |       |      |            |         |         |               |             |       |       |  |                                        |       |   |   | 327 338 484.56 1450.65 1450.69 -0.04 0 69 7.26E-06 K.YKPESEELTAER.I      |               |              |  |
|                                                                      |          |       |                   |                                                              |     |          |             |                                          |                 |          |       |      |            |         |         |               |             |       |       |  |                                        |       |   |   | 376 386 447.87 1340.59 1340.62 -0.03 1 57 0.000146 K.NFEDVAFDEKK.N       |               |              |  |
|                                                                      |          |       |                   |                                                              |     |          |             |                                          |                 |          |       |      |            |         |         |               |             |       |       |  |                                        |       |   |   | 425 436 655.29 1308.57 1308.59 -0.02 0 85 2.38E-07 K.MDSTANEVAVK.V       |               |              |  |
|                                                                      |          |       |                   |                                                              |     |          |             |                                          |                 |          |       |      |            |         |         |               |             |       |       |  |                                        |       |   |   |                                                                          | 14.14         |              |  |
| P50990                                                               | 23%      | 660   | 11                | 60153                                                        | 5.4 | P50990   | TCPQ_HUMAN  | T-complex protein 1 subunit theta        | OS=Homo sapiens | GN=CCT8  | PE=1  | SV=4 |            |         |         |               |             |       |       |  |                                        |       |   |   |                                                                          |               |              |  |
|                                                                      |          |       |                   |                                                              |     |          |             |                                          |                 |          |       |      |            |         |         |               |             |       |       |  | Oxidation (M)                          | 21.31 | 9 | 1 |                                                                          |               |              |  |
|                                                                      |          |       |                   |                                                              |     |          |             |                                          |                 |          |       |      |            |         |         |               |             |       |       |  |                                        |       |   |   | 63 74 667.37 1332.72 1332.74 -0.02 0 101 5.43E-09 K.LFVTNDAATILR.E       |               |              |  |
|                                                                      |          |       |                   |                                                              |     |          |             |                                          |                 |          |       |      |            |         |         |               |             |       |       |  |                                        |       |   |   | 156 165 573.79 1145.57 1145.59 -0.03 0 39 0.0108256 R.DIVEVSLLR.T        |               |              |  |
|                                                                      |          |       |                   |                                                              |     |          |             |                                          |                 |          |       |      |            |         |         |               |             |       |       |  |                                        |       |   |   | 226 235 532.76 1063.5 1063.5 0 0 49 0.0008654 K.ETEGDVTSVK.D             |               |              |  |
|                                                                      |          |       |                   |                                                              |     |          |             |                                          |                 |          |       |      |            |         |         |               |             |       |       |  |                                        |       |   |   | 271 281 625.28 1248.54 1248.57 -0.03 0 64 3.00E-05 K.GEENLMDAQVK.A       |               |              |  |
|                                                                      |          |       |                   |                                                              |     |          |             |                                          |                 |          |       |      |            |         |         |               |             |       |       |  |                                        |       |   |   | 282 296 686.86 1371.71 1371.74 -0.03 0 92 4.75E-08 K.AIADGTGANVVVTGGK.V  |               |              |  |
|                                                                      |          |       |                   |                                                              |     |          |             |                                          |                 |          |       |      |            |         |         |               |             |       |       |  |                                        |       |   |   | 327 335 443.25 884.49 884.51 -0.01 0 46 0.0020571 K.TVGATALPR.L          |               |              |  |
|                                                                      |          |       |                   |                                                              |     |          |             |                                          |                 |          |       |      |            |         |         |               |             |       |       |  |                                        |       |   |   | 379 390 691.3 1380.58 1380.58 0 0 83 3.60E-07 R.GSTDNLMDIER.A            |               |              |  |
|                                                                      |          |       |                   |                                                              |     |          |             |                                          |                 |          |       |      |            |         |         |               |             |       |       |  |                                        |       |   |   | 391 400 533.25 1064.49 1064.51 -0.02 0 44 0.0026879 R.AVDDGVNTFK.V       |               |              |  |
|                                                                      |          |       |                   |                                                              |     |          |             |                                          |                 |          |       |      |            |         |         |               |             |       |       |  |                                        |       |   |   | 408 421 677.88 1353.75 1353.75 0 0 35 0.0206846 R.LVPGGGATEIELAK.Q       |               |              |  |
|                                                                      |          |       |                   |                                                              |     |          |             |                                          |                 |          |       |      |            |         |         |               |             |       |       |  |                                        |       |   |   | 441 450 575.79 1149.56 1149.58 -0.02 0 62 4.56E-05 K.FAEFAEIPR.A         |               |              |  |
|                                                                      |          |       |                   |                                                              |     |          |             |                                          |                 |          |       |      |            |         |         |               |             |       |       |  |                                        |       |   |   | 510 520 564.83 1127.65 1127.67 -0.02 0 48 0.0013257 K.LATNAAVTVLR.V      |               |              |  |
|                                                                      |          |       |                   |                                                              |     |          |             |                                          |                 |          |       |      |            |         |         |               |             |       |       |  |                                        |       |   |   |                                                                          | 19.79         |              |  |
| P14618                                                               | 17%      | 363   | 7                 | 58470                                                        | 8   | P14618   | KPYM_HUMAN  | Pyruvate kinase isozymes M1/M2           | OS=Homo sapiens | GN=PKM2  | PE=1  | SV=4 |            |         |         |               |             |       |       |  |                                        |       |   |   |                                                                          |               |              |  |
|                                                                      |          |       |                   |                                                              |     |          |             |                                          |                 |          |       |      |            |         |         |               |             |       |       |  | Oxidation (M)                          | 20.1  | 9 | 2 |                                                                          |               |              |  |
|                                                                      |          |       |                   |                                                              |     |          |             |                                          |                 |          |       |      |            |         |         |               |             |       |       |  |                                        |       |   |   | 33 43 599.33 1196.64 1196.64 0 0 49 0.0008067 R.LDIDSPPTAR.N             |               |              |  |
|                                                                      |          |       |                   |                                                              |     |          |             |                                          |                 |          |       |      |            |         |         |               |             |       |       |  |                                        |       |   |   | 44 56 680.35 1358.69 1358.7 -0.01 0 44 0.0030569 R.NTGICTIGPASR.S        |               |              |  |
|                                                                      |          |       |                   |                                                              |     |          |             |                                          |                 |          |       |      |            |         |         |               |             |       |       |  |                                        |       |   |   | 126 135 495.75 989.48 989.5 -0.02 0 43 0.0040316 K.GSGTAEVELK.K          |               |              |  |
|                                                                      |          |       |                   |                                                              |     |          |             |                                          |                 |          |       |      |            |         |         |               |             |       |       |  |                                        |       |   |   | 142 151 607.29 1212.56 1212.57 -0.01 0 46 0.0016666 K.ITLDNAYMEK.C       |               |              |  |
|                                                                      |          |       |                   |                                                              |     |          |             |                                          |                 |          |       |      |            |         |         |               |             |       |       |  |                                        |       |   |   | 189 206 890.43 1778.84 1778.87 -0.03 0 92 3.30E-08 K.GADFLVTEVENGSLGSK.K |               |              |  |
|                                                                      |          |       |                   |                                                              |     |          |             |                                          |                 |          |       |      |            |         |         |               |             |       |       |  |                                        |       |   |   | 208 224 818.94 1635.86 1635.88 -0.03 0 50 0.0007182 K.GVNLPGAAVDLPVSEK.D |               |              |  |
|                                                                      |          |       |                   |                                                              |     |          |             |                                          |                 |          |       |      |            |         |         |               |             |       |       |  |                                        |       |   |   | 295 305 571.3 1140.59 1140.6 -0.01 0 40 0.0079424 R.GDLGLEIPEAK.V        |               |              |  |
|                                                                      |          |       |                   |                                                              |     |          |             |                                          |                 |          |       |      |            |         |         |               |             |       |       |  |                                        |       |   |   |                                                                          | 21.62         |              |  |
|                                                                      | 21.04    |       |                   |                                                              |     |          |             |                                          |                 |          |       |      |            |         |         |               |             |       |       |  |                                        |       |   |   |                                                                          |               |              |  |

| accession # | coverage | score  | distinct peptides | mass    | pl    | start AA | end AA      | m/z obs                               | M obs              | M calc    | delta | miss | pept score | exp val | peptide | modifications | retent time | Strongest gel | # gel slices |              |                                    |                               |           |    |    |      |      |        |         |         |         |         |       |           |               |           |                     |       |    |   |
|-------------|----------|--------|-------------------|---------|-------|----------|-------------|---------------------------------------|--------------------|-----------|-------|------|------------|---------|---------|---------------|-------------|---------------|--------------|--------------|------------------------------------|-------------------------------|-----------|----|----|------|------|--------|---------|---------|---------|---------|-------|-----------|---------------|-----------|---------------------|-------|----|---|
|             |          |        |                   |         |       |          |             |                                       |                    |           |       |      |            |         |         |               |             | slice         | found        |              |                                    |                               |           |    |    |      |      |        |         |         |         |         |       |           |               |           |                     |       |    |   |
| P50991      | 16%      | 446    | 9                 | 58401   | 8     | P50991   | TCPD_HUMAN  | T-complex protein 1 subunit delta     | OS=Homo sapiens    | GN=CCT4   | PE=1  | SV=4 |            |         |         |               |             |               |              |              |                                    |                               |           |    |    |      |      |        |         |         |         |         |       |           |               |           |                     |       |    |   |
|             |          |        |                   |         |       |          |             |                                       |                    |           |       |      | 35         | 42      | 419.22  | 836.42        | 836.44      | -0.02         | 0            | 36           | 0.0148108                          | R.FSNISAAK.A                  | 13.53     | 9  | 1  |      |      |        |         |         |         |         |       |           |               |           |                     |       |    |   |
|             |          |        |                   |         |       |          |             |                                       |                    |           |       |      | 66         | 79      | 709.37  | 1416.73       | 1416.75     | -0.02         | 0            | 56           | 0.0001828                          | K.GDVITITNDGATILK.Q           | 20.32     |    |    |      |      |        |         |         |         |         |       |           |               |           |                     |       |    |   |
|             |          |        |                   |         |       |          |             |                                       |                    |           |       |      | 161        | 174     | 739.88  | 1477.75       | 1477.76     | -0.01         | 0            | 81           | 5.60E-07                           | R.ETLLNSATTSLNSK.V            | 20.23     |    |    |      |      |        |         |         |         |         |       |           |               |           |                     |       |    |   |
|             |          |        |                   |         |       |          |             |                                       |                    |           |       |      | 281        | 288     | 467.29  | 932.56        | 932.57      | -0.01         | 0            | 38           | 0.0144878                          | R.AYILNLVK.Q                  | 21.22     |    |    |      |      |        |         |         |         |         |       |           |               |           |                     |       |    |   |
|             |          |        |                   |         |       |          |             |                                       |                    |           |       |      | 385        | 391     | 394.24  | 786.47        | 786.5       | -0.02         | 0            | 34           | 0.037482                           | K.TVTIVVR.G                   | 16.37     |    |    |      |      |        |         |         |         |         |       |           |               |           |                     |       |    |   |
|             |          |        |                   |         |       |          |             |                                       |                    |           |       |      | 392        | 403     | 448.89  | 1343.65       | 1343.7      | -0.05         | 1            | 51           | 0.0006435                          | R.GSNKLVIEEAEER.S             | 15.41     |    |    |      |      |        |         |         |         |         |       |           |               |           |                     |       |    |   |
|             |          |        |                   |         |       |          |             |                                       |                    |           |       |      | 396        | 403     | 479.76  | 957.5         | 957.51      | -0.01         | 0            | 34           | 0.0327298                          | K.LVIEEAEER.S                 | 16.63     |    |    |      |      |        |         |         |         |         |       |           |               |           |                     |       |    |   |
|             |          |        |                   |         |       |          |             |                                       |                    |           |       |      | 420        | 435     | 775.94  | 1549.87       | 1549.88     | -0.01         | 0            | 68           | 9.98E-06                           | R.ALIAGGGAPFEIELALR.L         | 21.88     |    |    |      |      |        |         |         |         |         |       |           |               |           |                     |       |    |   |
|             |          |        |                   |         |       |          |             |                                       |                    |           |       |      | 420        | 435     | 775.94  | 1549.87       | 1549.88     | -0.01         | 0            | 68           | 9.98E-06                           | R.ALIAGGGAPFEIELALR.L         | 21.88     |    |    |      |      |        |         |         |         |         |       |           |               |           |                     |       |    |   |
|             |          |        |                   |         |       |          |             |                                       |                    |           |       |      | 532        | 539     | 466.24  | 930.46        | 930.48      | -0.02         | 0            | 48           | 0.0015663                          | K.IDDVVNTR.-                  | 14.23     |    |    |      |      |        |         |         |         |         |       |           |               |           |                     |       |    |   |
|             |          |        |                   |         |       |          |             |                                       |                    |           |       |      | P30101     | 16%     | 351     | 7             | 57146       | 6             | P30101       | PDLIA3_HUMAN | Protein disulfide-isomerase A3     | OS=Homo sapiens               | GN=PDLIA3 |    |    | PE=1 | SV=4 |        |         |         |         |         |       |           |               |           |                     |       |    |   |
|             |          |        |                   |         |       |          |             |                                       |                    |           |       |      |            |         |         |               |             |               |              |              |                                    |                               |           |    |    |      |      | 63     | 73      | 596.28  | 1190.55 | 1190.59 | -0.04 | 0         | 42            | 0.0053539 | R.LAPEYEAATR.L      | 15.54 | 9  | 2 |
| 131         | 140      | 498.27 | 994.53            | 994.56  | -0.03 | 0        | 43          | 0.0029823                             | K.QAGPASVPLR.T     | 15.11     |       |      |            |         |         |               |             |               |              |              |                                    |                               |           |    |    |      |      |        |         |         |         |         |       |           |               |           |                     |       |    |   |
| 336         | 344      | 594.75 | 1187.48           | 1187.53 | -0.04 | 0        | 48          | 0.0011682                             | K.FVMQEFSR.D       | 17.2      |       |      |            |         |         |               |             |               |              |              |                                    |                               |           |    |    |      |      |        |         |         |         |         |       |           |               |           |                     |       |    |   |
| 367         | 379      | 684.83 | 1367.65           | 1367.66 | -0.01 | 0        | 71          | 5.87E-06                              | K.SEPIPESENDGPVK.V | 15.06     |       |      |            |         |         |               |             |               |              |              |                                    |                               |           |    |    |      |      |        |         |         |         |         |       |           |               |           |                     |       |    |   |
| 423         | 433      | 399.91 | 1196.69           | 1196.71 | -0.02 | 1        | 37          | 0.0120614                             | K.LSKDPNIVIAK.M    | 14.93     |       |      |            |         |         |               |             |               |              |              |                                    |                               |           |    |    |      |      |        |         |         |         |         |       |           |               |           |                     |       |    |   |
| 472         | 482      | 685.85 | 1369.68           | 1369.69 | -0.01 | 0        | 35          | 0.0201546                             | R.ELDSFISYLQR.E    | 23.08     |       |      |            |         |         |               |             |               |              |              |                                    |                               |           |    |    |      |      |        |         |         |         |         |       |           |               |           |                     |       |    |   |
| 483         | 496      | 527.27 | 1578.8            | 1578.83 | -0.03 | 0        | 44          | 0.0026296                             | R.EATNPPVIQEEKPK.K | 13.79     |       |      |            |         |         |               |             |               |              |              |                                    |                               |           |    |    |      |      |        |         |         |         |         |       |           |               |           |                     |       |    |   |
| Q99832      | 13%      | 329    | 6                 | 59842   | 7.5   | Q99832   | TCPH_HUMAN  | T-complex protein 1 subunit eta       | OS=Homo sapiens    | GN=CCT7   | PE=1  | SV=2 |            |         |         |               |             |               |              |              |                                    |                               |           |    |    |      |      |        |         |         |         |         |       |           |               |           |                     |       |    |   |
|             |          |        |                   |         |       |          |             |                                       |                    |           |       |      |            |         |         |               |             |               |              |              |                                    |                               |           | 1  | 10 |      |      | 608.83 | 1215.65 | 1215.66 | -0.01   | 0       | 48    | 0.0011374 | -MMPPTVILLK.E | 21.93     | 9                   | 1     |    |   |
|             |          |        |                   |         |       |          |             |                                       |                    |           |       |      | 78         | 84      | 380.23  | 758.44        | 758.45      | -0.01         | 0            | 36           | 0.0248894                          | K.TLVDIAK.S                   | 18.16     |    |    |      |      |        |         |         |         |         |       |           |               |           |                     |       |    |   |
|             |          |        |                   |         |       |          |             |                                       |                    |           |       |      | 376        | 387     | 700.29  | 1398.57       | 1398.57     | 0             | 0            | 76           | 1.84E-06                           | R.GGAEQFMEETER.S              | 15.15     |    |    |      |      |        |         |         |         |         |       |           |               |           |                     |       |    |   |
|             |          |        |                   |         |       |          |             |                                       |                    |           |       |      | 402        | 418     | 846.9   | 1691.8        | 1691.8      | -0.01         | 0            | 67           | 1.20E-05                           | K.NDSVVAGGGAIEMLSK.Y          | 20.59     |    |    |      |      |        |         |         |         |         |       |           |               |           |                     |       |    |   |
|             |          |        |                   |         |       |          |             |                                       |                    |           |       |      | 441        | 447     | 406.25  | 810.48        | 810.5       | -0.02         | 0            | 41           | 0.0048281                          | K.ALEIIPR.Q                   | 20.15     |    |    |      |      |        |         |         |         |         |       |           |               |           |                     |       |    |   |
|             |          |        |                   |         |       |          |             |                                       |                    |           |       |      | 448        | 463     | 897.42  | 1792.82       | 1792.84     | -0.02         | 0            | 62           | 4.04E-05                           | R.QLCDNAGFDATNINLNL           | 21.13     |    |    |      |      |        |         |         |         |         |       |           |               |           |                     |       |    |   |
| P31146      | 8%       | 221    | 4                 | 51678   | 6.3   | P31146   | COR1A_HUMAN | Coronin-1A                            | OS=Homo sapiens    | GN=CORO1A | PE=1  | SV=4 |            |         |         |               |             |               |              |              |                                    |                               |           |    |    |      |      |        |         |         |         |         |       |           |               |           |                     |       |    |   |
|             |          |        |                   |         |       |          |             |                                       |                    |           |       |      | 384        | 393     | 513.8   | 1025.59       | 1025.61     | -0.02         | 0            | 45           | 0.0020398                          | R.DAGPLILSLK.D                | 21.8      | 9  | 1  |      |      |        |         |         |         |         |       |           |               |           |                     |       |    |   |
|             |          |        |                   |         |       |          |             |                                       |                    |           |       |      | 417        | 432     | 751.85  | 1501.69       | 1501.7      | -0.01         | 0            | 74           | 2.70E-06                           | R.AAPEASGTPSSDAVSR.L          | 13.22     |    |    |      |      |        |         |         |         |         |       |           |               |           |                     |       |    |   |
|             |          |        |                   |         |       |          |             |                                       |                    |           |       |      | 439        | 449     | 429.24  | 1284.7        | 1284.74     | -0.04         | 1            | 34           | 0.0311191                          | R.KLQATVQELQK.R               | 14.49     |    |    |      |      |        |         |         |         |         |       |           |               |           |                     |       |    |   |
|             |          |        |                   |         |       |          |             |                                       |                    |           |       |      | 440        | 449     | 579.32  | 1156.62       | 1156.65     | -0.03         | 0            | 68           | 1.20E-05                           | K.LQATVQELQK.R                | 16.2      |    |    |      |      |        |         |         |         |         |       |           |               |           |                     |       |    |   |
| P06744      | 8%       | 183    | 3                 | 63335   | 8.4   | P06744   | G6PI_HUMAN  | Glucose-6-phosphate isomerase         | OS=Homo sapiens    | GN=GPI    | PE=1  | SV=4 |            |         |         |               |             |               |              |              |                                    |                               |           |    |    |      |      |        |         |         |         |         |       |           |               |           |                     |       |    |   |
|             |          |        |                   |         |       |          |             |                                       |                    |           |       |      | 107        | 116     | 522.28  | 1042.54       | 1042.57     | -0.03         | 0            | 45           | 0.0023544                          | R.SNTPILVDGK.D                | 16.46     | 9  | 1  |      |      |        |         |         |         |         |       |           |               |           |                     |       |    |   |
|             |          |        |                   |         |       |          |             |                                       |                    |           |       |      | 195        | 211     | 916.51  | 1831.01       | 1831.01     | 0             | 0            | 61           | 5.11E-05                           | K.TLAQLNPESLFIASK.T           | 22.86     |    |    |      |      |        |         |         |         |         |       |           |               |           |                     |       |    |   |
|             |          |        |                   |         |       |          |             |                                       |                    |           |       |      | 212        | 226     | 828.4   | 1654.79       | 1654.8      | -0.01         | 0            | 77           | 1.22E-06                           | K.TFTTQETITNAETAK.E           | 19.48     |    |    |      |      |        |         |         |         |         |       |           |               |           |                     |       |    |   |
| Q01518      | 42%      | 1311   | 22                | 52222   | 8.3   | Q01518   | CAP1_HUMAN  | Adenylyl cyclase-associated protein 1 | OS=Homo sapiens    | GN=CAP1   | PE=1  | SV=4 |            |         |         |               |             |               |              |              |                                    |                               |           |    |    |      |      |        |         |         |         |         |       |           |               |           |                     |       |    |   |
|             |          |        |                   |         |       |          |             |                                       |                    |           |       |      | 2          | 10      | 567.26  | 1132.5        | 1132.52     | -0.02         | 0            | 66           | 1.81E-05                           | M.ADMQNVLVER.L                | 17.48     | 10 | 3  |      |      |        |         |         |         |         |       |           |               |           |                     |       |    |   |
|             |          |        |                   |         |       |          |             |                                       |                    |           |       |      | 2          | 13      | 766.37  | 1530.72       | 1530.75     | -0.02         | 1            | 31           | 0.0497159                          | M.ADMQNVLVER.L.A              | 20.9      |    |    |      |      |        |         |         |         |         |       |           |               |           |                     |       |    |   |
|             |          |        |                   |         |       |          |             |                                       |                    |           |       |      | 64         | 71      | 423.21  | 844.41        | 844.43      | -0.02         | 0            | 46           | 0.0023429                          | K.EIGGDVQK.H                  | 12.77     |    |    |      |      |        |         |         |         |         |       |           |               |           |                     |       |    |   |
|             |          |        |                   |         |       |          |             |                                       |                    |           |       |      | 85         | 100     | 879.44  | 1756.86       | 1756.88     | -0.01         | 0            | 107          | 1.12E-09                           | R.ALLVTSAQCCQQAENK.L          | 17.18     |    |    |      |      |        |         |         |         |         |       |           |               |           |                     |       |    |   |
|             |          |        |                   |         |       |          |             |                                       |                    |           |       |      | 101        | 113     | 713.89  | 1425.76       | 1425.81     | -0.05         | 0            | 51           | 0.0006092                          | K.LSDLLAPISEQIK.E             | 23.65     |    |    |      |      |        |         |         |         |         |       |           |               |           |                     |       |    |   |
|             |          |        |                   |         |       |          |             |                                       |                    |           |       |      | 101        | 113     | 713.9   | 1425.79       | 1425.81     | -0.02         | 0            | 70           | 7.46E-06                           | K.LSDLLAPISEQIK.E             | 21.61     |    |    |      |      |        |         |         |         |         |       |           |               |           |                     |       |    |   |
|             |          |        |                   |         |       |          |             |                                       |                    |           |       |      | 114        | 119     | 382.71  | 763.4         | 763.42      | -0.02         | 0            | 33           | 0.0381004                          | K.EVITFR.E                    | 19.24     |    |    |      |      |        |         |         |         |         |       |           |               |           |                     |       |    |   |
|             |          |        |                   |         |       |          |             |                                       |                    |           |       |      | 156        | 167     | 747.79  | 1493.57       | 1493.59     | -0.02         | 0            | 80           | 6.92E-07                           | K.EMNDAAMFYTN.R.V             | 18.58     |    |    |      |      |        |         |         |         |         |       |           |               |           |                     |       |    |   |
|             |          |        |                   |         |       |          |             |                                       |                    |           |       |      | 273        | 287     | 434.96  | 1735.8        | 1735.87     | -0.07         | 2            | 37           | 0.0122004                          | K.HVSDDMKTHKNPALK.A           | 11.95     |    |    |      |      |        |         |         |         |         |       |           |               |           |                     |       |    |   |
|             |          |        |                   |         |       |          |             |                                       |                    |           |       |      | 295        | 312     | 460.24  | 1836.94       | 1836.97     | -0.04         | 0            | 64           | 2.37E-05                           | R.SGPKPFSAPKPKQTSPPSK.R       | 13.3      |    |    |      |      |        |         |         |         |         |       |           |               |           |                     |       |    |   |
|             |          |        |                   |         |       |          |             |                                       |                    |           |       |      | 314        | 327     | 504.94  | 1511.81       | 1511.86     | -0.05         | 2            | 62           | 4.53E-05                           | R.ATKKEPAVLELEGG.K            | 15.55     |    |    |      |      |        |         |         |         |         |       |           |               |           |                     |       |    |   |
|             |          |        |                   |         |       |          |             |                                       |                    |           |       |      | 317        | 327     | 404.89  | 1211.65       | 1211.68     | -0.03         | 1            | 58           | 0.0001215                          | K.KEPAVLELEGG.K               | 19.2      |    |    |      |      |        |         |         |         |         |       |           |               |           |                     |       |    |   |
|             |          |        |                   |         |       |          |             |                                       |                    |           |       |      | 317        | 328     | 447.58  | 1339.72       | 1339.77     | -0.05         | 2            | 68           | 1.01E-05                           | K.KEPAVLELEGG.K.W             | 15.24     |    |    |      |      |        |         |         |         |         |       |           |               |           |                     |       |    |   |
|             |          |        |                   |         |       |          |             |                                       |                    |           |       |      | 318        | 327     | 542.8   | 1083.58       | 1083.58     | 0             | 0            | 61           | 5.87E-05                           | K.EPAVLELEGG.K                | 20.27     |    |    |      |      |        |         |         |         |         |       |           |               |           |                     |       |    |   |
|             |          |        |                   |         |       |          |             |                                       |                    |           |       |      | 331        | 348     | 1037.01 | 2072.01       | 2072.03     | -0.02         | 0            | 133          | 2.94E-12                           | R.VENQENVSINLVIEDTELK.Q       | 21.21     |    |    |      |      |        |         |         |         |         |       |           |               |           |                     |       |    |   |
|             |          |        |                   |         |       |          |             |                                       |                    |           |       |      | 356        | 364     | 538.78  | 1075.54       | 1075.57     | -0.03         | 0            | 48           | 0.0011409                          | K.CVNNTLQIK.G                 | 16.91     |    |    |      |      |        |         |         |         |         |       |           |               |           |                     |       |    |   |
|             |          |        |                   |         |       |          |             |                                       |                    |           |       |      | 385        | 377     | 492.92  | 1475.73       | 1475.78     | -0.04         | 2            | 66           | 1.74E-05                           | K.KINSITVDNCKK.L              | 12.82     |    |    |      |      |        |         |         |         |         |       |           |               |           |                     |       |    |   |
|             |          |        |                   |         |       |          |             |                                       |                    |           |       |      | 367        | 376     | 582.28  | 1162.55       | 1162.57     | -0.02         | 0            | 65           | 2.15E-05                           | K.INSITVDNCKK.K               | 14.36     |    |    |      |      |        |         |         |         |         |       |           |               |           |                     |       |    |   |
|             |          |        |                   |         |       |          |             |                                       |                    |           |       |      | 367        | 377     | 431.21  | 1290.62       | 1290.66     | -0.04         | 1            | 41           | 0.0055202                          | K.INSITVDNCKK.L               | 13.17     |    |    |      |      |        |         |         |         |         |       |           |               |           |                     |       |    |   |
|             |          |        |                   |         |       |          |             |                                       |                    |           |       |      | 405        | 412     | 436.26  | 870.51        | 870.52      | -0.01         | 0            | 39           | 0.0094252                          | K.VPTISINK.T                  | 17.88     |    |    |      |      |        |         |         |         |         |       |           |               |           |                     |       |    |   |
|             |          |        |                   |         |       |          |             |                                       |                    |           |       |      | 423        | 433     | 618.29  | 1234.57       | 1234.59     | -0.02         | 0            | 71           | 6.35E-06                           | K.NSLDCEIVSAK.S               | 19.15     |    |    |      |      |        |         |         |         |         |       |           |               |           |                     |       |    |   |
|             |          |        |                   |         |       |          |             |                                       |                    |           |       |      | 434        | 458     | 943.1   | 2826.28       | 2826.31     | -0.03         | 0            | 66           | 1.17E-05                           | K.SSEMNVLIPTEGGDFNEFPVPEQFK.T | 22.45     |    |    |      |      |        |         |         |         |         |       |           |               |           |                     |       |    |   |
|             |          |        |                   |         |       |          |             |                                       |                    |           |       |      | O43175     | 17%     | 513     | 8             | 57356       | 6.3           | O43175       | SERA_HUMAN   | D-3-phosphoglycerate dehydrogenase | OS=Homo sapiens               | GN=PHGDH  |    |    | PE=1 | SV=4 |        |         |         |         |         |       |           |               |           |                     |       |    |   |
|             |          |        |                   |         |       |          |             |                                       |                    |           |       |      |            |         |         |               |             |               |              |              |                                    |                               |           |    |    |      |      | 22     | 33      | 649.86  | 1297.7  | 1297.72 | -0.02 | 0         | 85            | 2.42E-07  | K.ILDQGGLOVVEK.Q    | 19.86 | 10 | 1 |
|             |          |        |                   |         |       |          |             |                                       |                    |           |       |      |            |         |         |               |             |               |              |              |                                    |                               |           |    |    |      |      | 59     | 69      | 565.79  | 1129.56 | 1129.6  | -0.03 | 0         | 65            | 2.81E-05  | K.VTADVINAELK.L     | 16.56 |    |   |
|             |          |        |                   |         |       |          |             |                                       |                    |           |       |      |            |         |         |               |             |               |              |              |                                    |                               |           |    |    |      |      | 76     | 90      | 744.86  | 1487.7  | 1487.72 | -0.02 | 0         | 79            | 8.37E-07  | R.AGTGVNDVDLEAATR.K | 19.6  |    |   |
| 138         | 146      | 506.74 | 1011.46           | 1011.47 | -0.01 | 0        | 34          | 0.0277944                             | K.FMGTELNGK.T      | 14.14     |       |      |            |         |         |               |             |               |              |              |                                    |                               |           |    |    |      |      |        |         |         |         |         |       |           |               |           |                     |       |    |   |
| 147         | 155      | 450.27 | 898.52            | 898.56  | -0.04 | 0        | 42          | 0.004152                              | K.TLGIILGLR.I      | 21.43     |       |      |            |         |         |               |             |               |              |              |                                    |                               |           |    |    |      |      |        |         |         |         |         |       |           |               |           |                     |       |    |   |
| 237         | 247      | 550.31 | 1098.6            | 1098.6  | -0.01 | 0        | 53          | 0.0003542                             | R.GGIVDEGALLR.A    | 20.67     |       |      |            |         |         |               |             |               |              |              |                                    |                               |           |    |    |      |      |        |         |         |         |         |       |           |               |           |                     |       |    |   |
| 352         | 364      | 673.38 | 1344.75           | 1344.76 | -0.01 | 0        | 70          | 8.32E-06                              | K.GTIQVITQGTSLK.N  | 20.04     |       |      |            |         |         |               |             |               |              |              |                                    |                               |           |    |    |      |      |        |         |         |         |         |       |           |               |           |                     |       |    |   |

| accession # | coverage | score  | distinct peptides | mass    | pl    | start AA | end AA      | m/z obs   | M obs               | M calc                   | delta                                                     | miss            | pept score | exp val | peptide | modifications | retent time               | Strongest gel slice                    | # gel slices found |                     |                    |    |           |                    |             |       |       |    |    |
|-------------|----------|--------|-------------------|---------|-------|----------|-------------|-----------|---------------------|--------------------------|-----------------------------------------------------------|-----------------|------------|---------|---------|---------------|---------------------------|----------------------------------------|--------------------|---------------------|--------------------|----|-----------|--------------------|-------------|-------|-------|----|----|
| P21796      | 16%      | 352    | 5                 | 30868   | 8.6   | P21796   | VDAC1_HUMAN | 385       | 394                 | 536.29                   | 1070.56                                                   | 1070.57         | -0.01      | 0       | 85      | 2.31E-07      | K.QADVNLVNAK.L            |                                        | 15.03              | Strongest gel slice | # gel slices found |    |           |                    |             |       |       |    |    |
|             |          |        |                   |         |       |          |             | 33        | 53                  | 730.33                   | 2187.96                                                   | 2188.01         | -0.05      | 1       | 84      | 2.05E-07      | K.TKSENGLEFTSSGSANTETTK.V |                                        | 15.11              | 10                  | 5                  |    |           |                    |             |       |       |    |    |
|             |          |        |                   |         |       |          |             | 35        | 53                  | 980.44                   | 1958.86                                                   | 1958.87         | -0.01      | 0       | 80      | 5.48E-07      | K.SENGLFTSSGSANTETTK.V    |                                        | 19.02              |                     |                    |    |           |                    |             |       |       |    |    |
|             |          |        |                   |         |       |          |             | 97        | 109                 | 700.83                   | 1399.65                                                   | 1399.66         | -0.01      | 0       | 102     | 4.06E-09      | K.LTFDSSFSPNTGK.K         |                                        | 20.49              |                     |                    |    |           |                    |             |       |       |    |    |
|             |          |        |                   |         |       |          |             | 97        | 110                 | 510.26                   | 1527.74                                                   | 1527.76         | -0.01      | 1       | 44      | 0.0025081     | K.LTFDSSFSPNTGKK.N        |                                        | 19.78              |                     |                    |    |           |                    |             |       |       |    |    |
|             |          |        |                   |         |       |          |             | 164       | 174                 | 607.3                    | 1212.59                                                   | 1212.61         | -0.02      | 0       | 40      | 0.0065288     | R.VTQSNFAVGYK.T           |                                        | 18.49              |                     |                    |    |           |                    |             |       |       |    |    |
| P78371      | 11%      | 313    | 6                 | 57794   | 6     | P78371   | TCPB_HUMAN  | 2         | 13                  | 651.37                   | 1300.72                                                   | 1300.74         | -0.02      | 0       | 44      | 0.0031969     | M.ASLSLAPVNIK.A           | Acetyl (Protein N-term)                | 23.91              | 10                  | 1                  |    |           |                    |             |       |       |    |    |
|             |          |        |                   |         |       |          |             | 58        | 72                  | 782.89                   | 1563.77                                                   | 1563.78         | -0.01      | 0       | 52      | 0.0003946     | R.DASLMVTNDGATILK.N       | Oxidation (M)                          | 20.45              |                     |                    |    |           |                    |             |       |       |    |    |
|             |          |        |                   |         |       |          |             | 112       | 119                 | 430.73                   | 859.45                                                    | 859.47          | -0.02      | 0       | 60      | 0.0001047     | R.EAESLIAK.K              |                                        | 14.45              |                     |                    |    |           |                    |             |       |       |    |    |
|             |          |        |                   |         |       |          |             | 237       | 248                 | 654.32                   | 1306.62                                                   | 1306.64         | -0.02      | 0       | 44      | 0.002916      | K.ILIANTGMDTDK.I          | Oxidation (M)                          | 16.08              |                     |                    |    |           |                    |             |       |       |    |    |
|             |          |        |                   |         |       |          |             | 237       | 250                 | 516.94                   | 1547.81                                                   | 1547.82         | -0.01      | 1       | 36      | 0.0180614     | K.ILIANTGMDTDKIK.I        | Oxidation (M)                          | 17.61              |                     |                    |    |           |                    |             |       |       |    |    |
|             |          |        |                   |         |       |          |             | 377       | 388                 | 665.83                   | 1329.64                                                   | 1329.65         | -0.01      | 0       | 47      | 0.0016571     | R.GATQQLDEAER.S           |                                        | 19.82              |                     |                    |    |           |                    |             |       |       |    |    |
|             |          |        |                   |         |       |          |             | 9.2       | Q5VTE0              | EF1A3_HUMAN              | Putative elongation factor 1-alpha-like 3                 | OS=Homo sapiens | GN=EEF1A3  | PE=5    | SV=1    | 38            | 44                        | 447.74                                 | 893.47             | 893.49              | -0.01              | 1  | 33        | 0.0356347          | R.TIEKFEK.E |       | 13.12 | 10 | 10 |
|             |          |        |                   |         |       |          |             | 147       | 154                 | 427.25                   | 852.49                                                    | 852.51          | -0.02      | 0       | 37      | 0.0122834     | K.QLIVGVNK.M              | Gln->pyro-Glu (N-term Q)               | 21.25              |                     |                    |    |           |                    |             |       |       |    |    |
| 173         | 179      | 420.22 | 838.44            | 838.44  | -0.01 | 0        | 47          | 0.0011123 | K.EVSTYIK.K         |                          | 15.15                                                     |                 |            |         |         |               |                           |                                        |                    |                     |                    |    |           |                    |             |       |       |    |    |
| 256         | 266      | 513.31 | 1024.6            | 1024.6  | -0.01 | 0        | 71          | 4.66E-06  | K.IGGIGTVPVGR.V     |                          | 19.73                                                     |                 |            |         |         |               |                           |                                        |                    |                     |                    |    |           |                    |             |       |       |    |    |
| 431         | 439      | 449.27 | 896.52            | 896.53  | -0.01 | 0        | 55          | 0.0001916 | R.QTVAVGVIK.A       | Gln->pyro-Glu (N-term Q) | 20.77                                                     |                 |            |         |         |               |                           |                                        |                    |                     |                    |    |           |                    |             |       |       |    |    |
| 431         | 439      | 457.9  | 913.79            | 913.56  | 0.23  | 0        | 68          | 2.37E-06  | R.QTVAVGVIK.A       |                          | 18.82                                                     |                 |            |         |         |               |                           |                                        |                    |                     |                    |    |           |                    |             |       |       |    |    |
| P52209      | 9%       | 210    | 4                 | 53619   | 6.8   | P52209   | PGD_HUMAN   | 39        | 48                  | 561.28                   | 1120.55                                                   | 1120.54         | 0.01       | 0       | 53      | 0.0004219     | K.VDDFLANEAK.G            |                                        | 20.12              | 10                  | 3                  |    |           |                    |             |       |       |    |    |
|             |          |        |                   |         |       |          |             | 52        | 64                  | 464.58                   | 1390.72                                                   | 1390.75         | -0.02      | 1       | 34      | 0.0283812     | K.VVGAQSLKEMVSK.L         | Oxidation (M)                          | 15.19              |                     |                    |    |           |                    |             |       |       |    |    |
|             |          |        |                   |         |       |          |             | 77        | 87                  | 596.79                   | 1191.57                                                   | 1191.58         | -0.01      | 0       | 86      | 1.97E-07      | K.AGQAVDDFIEK.L           |                                        | 20.08              |                     |                    |    |           |                    |             |       |       |    |    |
|             |          |        |                   |         |       |          |             | 155       | 163                 | 474.78                   | 947.54                                                    | 947.54          | 0          | 0       | 39      | 0.0096504     | K.TIFGQIAAK.V             |                                        | 20.29              |                     |                    |    |           |                    |             |       |       |    |    |
|             |          |        |                   |         |       |          |             | 5.2       | P50502              | F10A1_HUMAN              | Hsc70-interacting protein OS=Homo sapiens                 | GN=ST13         | PE=1       | SV=2    | 119     | 132           | 735.91                    | 1469.81                                | 1469.77            | 0.04                | 0                  | 57 | 0.0001499 | K.VAAIEALNDGELQK.A |             | 20.51 | 10    | 2  |    |
| 133         | 142      | 553.8  | 1105.59           | 1105.6  | -0.01 | 0        | 40          | 0.0075545 | K.AIDLFTDAIK.L      |                          | 22.08                                                     |                 |            |         |         |               |                           |                                        |                    |                     |                    |    |           |                    |             |       |       |    |    |
| 147         | 153      | 396.25 | 790.48            | 790.5   | -0.02 | 0        | 36          | 0.0234431 | R.LAILYAK.R         |                          | 20.25                                                     |                 |            |         |         |               |                           |                                        |                    |                     |                    |    |           |                    |             |       |       |    |    |
| O60664      | 6%       | 113    | 2                 | 47189   | 5.3   | O60664   | M6PBP_HUMAN | 129       | 140                 | 605.28                   | 1208.54                                                   | 1208.57         | -0.03      | 0       | 68      | 1.05E-05      | K.VSGAQEMVSSAK.D          | Oxidation (M)                          | 12.63              | 10                  | 2                  |    |           |                    |             |       |       |    |    |
|             |          |        |                   |         |       |          |             | 167       | 180                 | 690.36                   | 1378.71                                                   | 1378.69         | 0.02       | 0       | 45      | 0.0021047     | K.SVVTGGVQSVMGSR.L        | Oxidation (M)                          | 16.4               |                     |                    |    |           |                    |             |       |       |    |    |
|             |          |        |                   |         |       |          |             | 7         | P06733              | ENO1_HUMAN               | Alpha-enolase OS=Homo sapiens                             | GN=ENO1         | PE=1       | SV=2    | 222     | 228           | 401.23                    | 800.45                                 | 800.46             | -0.02               | 0                  | 51 | 0.000877  | K.EGLELLK.T        |             | 20.69 | 10    | 3  |    |
| 407         | 412      | 403.73 | 805.44            | 805.44  | 0     | 0        | 38          | 0.012234  | K.YNQLLR.I          |                          | 16.02                                                     |                 |            |         |         |               |                           |                                        |                    |                     |                    |    |           |                    |             |       |       |    |    |
| 413         | 420      | 452.73 | 903.44            | 903.45  | -0.02 | 0        | 43          | 0.0040857 | R.IEEELGSK.A        |                          | 13.68                                                     |                 |            |         |         |               |                           |                                        |                    |                     |                    |    |           |                    |             |       |       |    |    |
| P50454      | 5%       | 65     | 2                 | 46525   | 8.8   | P50454   | SERPH_HUMAN | 301       | 308                 | 399.74                   | 797.47                                                    | 797.5           | -0.03      | 0       | 33      | 0.0337376     | K.AVAISLPK.G              |                                        | 20.03              | 10                  | 2                  |    |           |                    |             |       |       |    |    |
|             |          |        |                   |         |       |          |             | 394       | 405                 | 647.34                   | 1292.66                                                   | 1292.67         | -0.01      | 0       | 32      | 0.0449731     | R.DTQSGSLLFIGR.L          |                                        | 22.03              |                     |                    |    |           |                    |             |       |       |    |    |
|             |          |        |                   |         |       |          |             | 9.2       | P25705              | ATPA_HUMAN               | ATP synthase subunit alpha, mitochondrial OS=Homo sapiens | GN=ATP5A1       | PE=1       | SV=1    | 74      | 83            | 500.78                    | 999.56                                 | 999.57             | -0.02               | 0                  | 34 | 0.0344745 | R.VLSIGDGIAR.V     |             | 20.09 | 10    | 1  |    |
| 134         | 149      | 812.93 | 1623.85           | 1623.88 | -0.03 | 0        | 50          | 0.0005942 | R.TGAIVDVPVGEELGR.V |                          | 22.01                                                     |                 |            |         |         |               |                           |                                        |                    |                     |                    |    |           |                    |             |       |       |    |    |
| Q9UNH7      | 5%       | 65     | 2                 | 46905   | 5.8   | Q9UNH7   | SNX6_HUMAN  | 61        | 68                  | 489.76                   | 977.5                                                     | 977.49          | 0.01       | 0       | 32      | 0.0486713     | K.QNEFSVVR.Q              |                                        | 18.29              | 11                  | 1                  |    |           |                    |             |       |       |    |    |
|             |          |        |                   |         |       |          |             | 194       | 204                 | 516.3                    | 1030.58                                                   | 1030.57         | 0.01       | 0       | 33      | 0.041093      | K.SADGVIVSGVK.D           |                                        | 16.47              |                     |                    |    |           |                    |             |       |       |    |    |
|             |          |        |                   |         |       |          |             | 5.3       | P06576              | ATPB_HUMAN               | ATP synthase subunit beta, mitochondrial OS=Homo sapiens  | GN=ATP5B        | PE=1       | SV=3    | 110     | 121           | 639.8                     | 1277.58                                | 1277.63            | -0.05               | 0                  | 44 | 0.0026329 | R.TIAMDTEGLVR.G    |             | 18.85 | 11    | 1  |    |
| 202         | 212      | 488.27 | 974.52            | 974.55  | -0.03 | 0        | 34          | 0.0326659 | K.IGLFGGAGVVK.T     |                          | 20.77                                                     |                 |            |         |         |               |                           |                                        |                    |                     |                    |    |           |                    |             |       |       |    |    |
| P60709      | 36%      | 746    | 13 (14)           | 42052   | 5.3   | P60709   | ACTB_HUMAN  | 2         | 18                  | 919.39                   | 1836.76                                                   | 1836.79         | -0.03      | 0       | 50      | 0.0006172     | M.DDDIAALVVDNNGSMCK.A     | Acetyl (Protein N-term); Oxidation (M) | 22.75              | 14                  | 12                 |    |           |                    |             |       |       |    |    |
|             |          |        |                   |         |       |          |             | 19        | 28                  | 488.72                   | 975.43                                                    | 975.44          | -0.02      | 0       | 73      | 4.23E-06      | K.AGFAGDDAPR.A            |                                        | 14.23              |                     |                    |    |           |                    |             |       |       |    |    |
|             |          |        |                   |         |       |          |             | 40        | 50                  | 401.85                   | 1202.54                                                   | 1202.55         | -0.02      | 0       | 49      | 0.0010147     | R.HQGVVMGMGQK.D           | 2 Oxidation (M)                        | 12.22              |                     |                    |    |           |                    |             |       |       |    |    |
|             |          |        |                   |         |       |          |             | 51        | 61                  | 599.76                   | 1197.5                                                    | 1197.51         | -0.01      | 0       | 61      | 5.32E-05      | K.DSVYVGEAQS.K            |                                        | 13.67              |                     |                    |    |           |                    |             |       |       |    |    |

| accession # | coverage | score | distinct peptides | mass  | pl  | start AA | end AA      | m/z obs                                                  | M obs           | M calc   | delta | miss | pept score | exp val   | peptide                     | modifications            | retent time | Strongest gel slice | # gel slices found |       |
|-------------|----------|-------|-------------------|-------|-----|----------|-------------|----------------------------------------------------------|-----------------|----------|-------|------|------------|-----------|-----------------------------|--------------------------|-------------|---------------------|--------------------|-------|
|             |          |       |                   |       |     | 51       | 62          | 452.2                                                    | 1353.58         | 1353.62  | -0.04 | 1    | 65         | 2.08E-05  | K.DSVYVGEAQSQR.G            |                          |             |                     | 13.15              |       |
|             |          |       |                   |       |     | 96       | 113         | 652.01                                                   | 1953.02         | 1953.06  | -0.04 | 0    | 56         | 0.0001578 | R.VAPEEHPVLLTEAPLNPK.A      |                          |             |                     | 20.4               |       |
|             |          |       |                   |       |     | 184      | 191         | 507.74                                                   | 1013.47         | 1013.47  | 0     | 0    | 38         | 0.012683  | R.DLTDYLMK.I                | Oxidation (M)            |             |                     | 21.1               |       |
|             |          |       |                   |       |     | 197      | 206         | 566.77                                                   | 1131.53         | 1131.52  | 0.01  | 0    | 53         | 0.0003568 | R.GYSFTTTAER.E              |                          |             |                     | 18.92              |       |
|             |          |       |                   |       |     | 239      | 254         | 895.95                                                   | 1789.88         | 1789.88  | -0.01 | 0    | 93         | 3.59E-08  | K.SYELPDGQVITIGNER.F        |                          |             |                     | 21.8               |       |
|             |          |       |                   |       |     | 313      | 326         | 527.6                                                    | 1579.77         | 1579.79  | -0.03 | 1    | 43         | 0.0030881 | R.MQEITALAPSTMK.I           | 2 Oxidation (M)          |             |                     | 15.1               |       |
|             |          |       |                   |       |     | 316      | 326         | 589.31                                                   | 1176.6          | 1176.61  | -0.01 | 0    | 53         | 0.0003634 | K.ITALAPSTMK.I              | Oxidation (M)            |             |                     | 17.13              |       |
|             |          |       |                   |       |     | 329      | 335         | 398.24                                                   | 794.47          | 794.47   | 0     | 0    | 41         | 0.0047096 | K.IIAPPER.K                 |                          |             |                     | 14.36              |       |
|             |          |       |                   |       |     | 360      | 372         | 750.35                                                   | 1498.69         | 1498.67  | 0.02  | 0    | 61         | 5.90E-05  | K.QEYDESGPSIVHR.K           | Gln->pyro-Glu (N-term Q) |             |                     |                    | 19.7  |
|             |          |       |                   |       |     | 360      | 372         | 506.23                                                   | 1515.68         | 1515.7   | -0.01 | 0    | 72         | 4.82E-06  | K.QEYDESGPSIVHR.K           |                          |             |                     | 15.88              |       |
| accession # | coverage | score | distinct peptides | mass  | pl  | start AA | end AA      | m/z obs                                                  | M obs           | M calc   | delta | miss | pept score | exp val   | peptide                     | modifications            | retent time | Strongest gel slice | # gel slices found |       |
| P00558      | 7%       | 113   | 3                 | 44985 | 8.3 | P00558   | PGK1_HUMAN  | Phosphoglycerate kinase 1                                | OS=Homo sapiens | GN=PGK1  | PE=1  | SV=3 |            |           |                             |                          |             | 14                  | 1                  |       |
|             |          |       |                   |       |     | 23       | 30          | 483.24                                                   | 964.46          | 964.47   | -0.01 | 0    | 38         | 0.010931  | R.VDFNVPKM.N                | Oxidation (M)            |             |                     | 19.44              |       |
|             |          |       |                   |       |     | 172      | 184         | 461.9                                                    | 1382.67         | 1382.7   | -0.02 | 0    | 35         | 0.0202968 | R.AHSSMVGVNLPQK.A           | Oxidation (M)            |             |                     | 14.49              |       |
|             |          |       |                   |       |     | 354      | 361         | 460.74                                                   | 919.46          | 919.47   | -0.01 | 0    | 39         | 0.0087605 | K.ALMDEVVK.A                | Oxidation (M)            |             |                     | 14.88              |       |
| accession # | coverage | score | distinct peptides | mass  | pl  | start AA | end AA      | m/z obs                                                  | M obs           | M calc   | delta | miss | pept score | exp val   | peptide                     | modifications            | retent time | Strongest gel slice | # gel slices found |       |
| P04075      | 35%      | 758   | 13 (14)           | 39851 | 8.3 | P04075   | ALDOA_HUMAN | Fructose-bisphosphate aldolase A                         | OS=Homo sapiens | GN=ALDOA | PE=1  | SV=2 |            |           |                             |                          |             | 15                  | 2                  |       |
|             |          |       |                   |       |     | 15       | 22          | 470.74                                                   | 939.48          | 939.48   | 0     | 0    | 55         | 0.0002139 | K.ELSDIAHR.I                |                          |             |                     | 13.95              |       |
|             |          |       |                   |       |     | 29       | 42          | 666.86                                                   | 1331.7          | 1331.69  | 0.01  | 0    | 79         | 9.79E-07  | K.GILAADESTGSIKR.R          |                          |             |                     | 19.62              |       |
|             |          |       |                   |       |     | 29       | 43          | 496.94                                                   | 1487.79         | 1487.79  | 0     | 1    | 52         | 0.0004676 | K.GILAADESTGSIKR.L          |                          |             |                     | 18.75              |       |
|             |          |       |                   |       |     | 43       | 57          | 601.63                                                   | 1801.87         | 1801.9   | -0.03 | 2    | 40         | 0.0060543 | K.RLQSIGTENTENRR.F          |                          |             |                     | 12.96              |       |
|             |          |       |                   |       |     | 44       | 56          | 745.86                                                   | 1489.71         | 1489.7   | 0.01  | 0    | 84         | 2.61E-07  | R.LQSIGTENTENR.R            |                          |             |                     | 14.34              |       |
|             |          |       |                   |       |     | 44       | 57          | 549.61                                                   | 1645.81         | 1645.8   | 0.01  | 1    | 34         | 0.0282524 | R.LQSIGTENTENRR.F           |                          |             |                     | 13.35              |       |
|             |          |       |                   |       |     | 61       | 69          | 522.79                                                   | 1043.57         | 1043.56  | 0.01  | 0    | 69         | 1.04E-05  | R.QLLLTADDR.V               |                          |             |                     | 19.97              |       |
|             |          |       |                   |       |     | 88       | 99          | 448.24                                                   | 1341.69         | 1341.7   | -0.01 | 0    | 46         | 0.0017572 | K.ADDGRPFPPQVIK.S           |                          |             |                     | 19.75              |       |
|             |          |       |                   |       |     | 100      | 111         | 396.24                                                   | 1185.69         | 1185.71  | -0.02 | 2    | 33         | 0.0400843 | K.SKGGVVGKVDK.G             |                          |             |                     | 13.22              |       |
|             |          |       |                   |       |     | 112      | 134         | 758.05                                                   | 2271.13         | 2271.13  | 0     | 0    | 96         | 1.47E-08  | K.GVVPLAGTNGETTQQGLDGLSER.C |                          |             |                     | 20.94              |       |
|             |          |       |                   |       |     | 141      | 147         | 362.16                                                   | 722.31          | 722.32   | -0.02 | 0    | 32         | 0.0391145 | K.DGADFADK.W                |                          |             |                     | 13.73              |       |
|             |          |       |                   |       |     | 209      | 215         | 382.23                                                   | 762.44          | 762.46   | -0.02 | 0    | 35         | 0.0326386 | K.VLAAYK.A                  |                          |             |                     | 15.68              |       |
|             |          |       |                   |       |     | 305      | 312         | 401.24                                                   | 800.47          | 800.48   | -0.01 | 0    | 48         | 0.0017458 | R.ALQASALK.A                |                          |             |                     | 14.08              |       |
|             |          |       |                   |       |     | 332      | 342         | 566.79                                                   | 1131.57         | 1131.57  | 0     | 0    | 59         | 0.0001063 | R.ALANSALCQKG.Y             |                          |             |                     | 14.95              |       |
| accession # | coverage | score | distinct peptides | mass  | pl  | start AA | end AA      | m/z obs                                                  | M obs           | M calc   | delta | miss | pept score | exp val   | peptide                     | modifications            | retent time | Strongest gel slice | # gel slices found |       |
| P40121      | 14%      | 295   | 5 (6)             | 38779 | 5.9 | P40121   | CAPG_HUMAN  | Macrophage-capping protein                               | OS=Homo sapiens | GN=CAPG  | PE=1  | SV=1 |            |           |                             |                          |             | 15                  | 1                  |       |
|             |          |       |                   |       |     | 192      | 198         | 386.24                                                   | 770.46          | 770.47   | -0.01 | 0    | 32         | 0.0421824 | R.DLALAIR.D                 |                          |             |                     | 20.72              |       |
|             |          |       |                   |       |     | 244      | 253         | 510.77                                                   | 1019.52         | 1019.54  | -0.02 | 0    | 43         | 0.003937  | K.ANAQAAALYK.V              |                          |             |                     | 14.51              |       |
|             |          |       |                   |       |     | 254      | 265         | 640.81                                                   | 1279.61         | 1279.61  | 0     | 0    | 90         | 6.36E-08  | K.VSDATGQMNLTK.V            | Oxidation (M)            |             |                     | 13.04              |       |
|             |          |       |                   |       |     | 307      | 319         | 686.88                                                   | 1371.74         | 1371.71  | 0.02  | 0    | 38         | 0.0120987 | R.QAALQVAEGFISR.M           | Gln->pyro-Glu (N-term Q) |             |                     |                    | 24.26 |
|             |          |       |                   |       |     | 307      | 319         | 695.35                                                   | 1388.69         | 1388.74  | -0.05 | 0    | 58         | 0.0001195 | R.QAALQVAEGFISR.M           |                          |             |                     | 21.73              |       |
|             |          |       |                   |       |     | 336      | 341         | 360.69                                                   | 719.37          | 719.39   | -0.02 | 0    | 39         | 0.0099463 | R.ESPIFK.Q                  |                          |             |                     | 16.63              |       |
| accession # | coverage | score | distinct peptides | mass  | pl  | start AA | end AA      | m/z obs                                                  | M obs           | M calc   | delta | miss | pept score | exp val   | peptide                     | modifications            | retent time | Strongest gel slice | # gel slices found |       |
| P08865      | 13%      | 207   | 3                 | 32947 | 4.8 | P08865   | RSSA_HUMAN  | 40S ribosomal protein SA                                 | OS=Homo sapiens | GN=RPSA  | PE=1  | SV=4 |            |           |                             |                          |             | 15                  | 1                  |       |
|             |          |       |                   |       |     | 64       | 80          | 870.99                                                   | 1739.97         | 1739.94  | 0.03  | 0    | 96         | 1.58E-08  | R.AIVAIAENPADVSVISSR.N      |                          |             |                     | 21.29              |       |
|             |          |       |                   |       |     | 90       | 102         | 602.34                                                   | 1202.66         | 1202.64  | 0.02  | 0    | 76         | 1.92E-06  | K.FAAATGATPIAGR.F           |                          |             |                     | 18.36              |       |
|             |          |       |                   |       |     | 121      | 128         | 456.78                                                   | 911.54          | 911.54   | 0     | 0    | 35         | 0.0184636 | R.LLVVTDPR.A                |                          |             |                     | 19.71              |       |
| accession # | coverage | score | distinct peptides | mass  | pl  | start AA | end AA      | m/z obs                                                  | M obs           | M calc   | delta | miss | pept score | exp val   | peptide                     | modifications            | retent time | Strongest gel slice | # gel slices found |       |
| Q15365      | 9%       | 163   | 3                 | 37987 | 6.7 | Q15365   | PCBP1_HUMAN | Poly(rC)-binding protein 1                               | OS=Homo sapiens | GN=PCBP1 | PE=1  | SV=2 |            |           |                             |                          |             | 15                  | 1                  |       |
|             |          |       |                   |       |     | 47       | 57          | 644.8                                                    | 1287.58         | 1287.59  | -0.01 | 0    | 61         | 6.11E-05  | R.INISEGNCPER.I             |                          |             |                     | 15.25              |       |
|             |          |       |                   |       |     | 298      | 306         | 507.76                                                   | 1013.51         | 1013.53  | -0.01 | 0    | 60         | 8.28E-05  | R.QGANINEIR.Q               |                          |             |                     | 14.77              |       |
|             |          |       |                   |       |     | 315      | 325         | 543.77                                                   | 1085.53         | 1085.55  | -0.01 | 0    | 42         | 0.0053369 | K.IANPVEGSSGR.Q             |                          |             |                     | 14.12              |       |
| accession # | coverage | score | distinct peptides | mass  | pl  | start AA | end AA      | m/z obs                                                  | M obs           | M calc   | delta | miss | pept score | exp val   | peptide                     | modifications            | retent time | Strongest gel slice | # gel slices found |       |
| P04899      | 7%       | 97    | 2                 | 40995 | 5.3 | P04899   | GNAI2_HUMAN | Guanine nucleotide-binding protein G(i), alpha-2 subunit | OS=Homo sapiens | GN=GNAI2 | PE=1  | SV=3 |            |           |                             |                          |             | 15                  | 1                  |       |
|             |          |       |                   |       |     | 36       | 46          | 529.32                                                   | 1056.62         | 1056.62  | 0     | 0    | 58         | 0.0001266 | K.LLLLGAAGESGK.S            |                          |             |                     | 20.81              |       |
|             |          |       |                   |       |     | 87       | 100         | 775.89                                                   | 1549.76         | 1549.72  | 0.04  | 0    | 39         | 0.0084712 | K.AMGNLQIDFADPSR.A          | Oxidation (M)            |             |                     | 20.9               |       |
| accession # | coverage | score | distinct peptides | mass  | pl  | start AA | end AA      | m/z obs                                                  | M obs           | M calc   | delta | miss | pept score | exp val   | peptide                     | modifications            | retent time | Strongest gel slice | # gel slices found |       |
| P08754      | 6%       | 96    | 2                 | 41076 | 5.5 | P08754   | GNAI3_HUMAN | Guanine nucleotide-binding protein G(k) subunit          | OS=Homo sapiens | GN=GNAI3 | PE=1  | SV=3 |            |           |                             |                          |             | 15                  | 1                  |       |
|             |          |       |                   |       |     | 36       | 46          | 529.32                                                   | 1056.62         | 1056.62  | 0     | 0    | 58         | 0.0001266 | K.LLLLGAAGESGK.S            |                          |             |                     | 20.81              |       |
|             |          |       |                   |       |     | 91       | 100         | 373.87                                                   | 1118.6          | 1118.61  | -0.01 | 1    | 38         | 0.0137381 | R.LKIDFGEAAR.A              |                          |             |                     | 20.24              |       |
| accession # | coverage | score | distinct peptides | mass  | pl  | start AA | end AA      | m/z obs                                                  | M obs           | M calc   | delta | miss | pept score | exp val   | peptide                     | modifications            | retent time | Strongest gel slice | # gel slices found |       |
| Q9Y617      | 6%       | 88    | 2                 | 40796 | 7.6 | Q9Y617   | SERC_HUMAN  | Phosphoserine aminotransferase                           | OS=Homo sapiens | GN=PSAT1 | PE=1  | SV=2 |            |           |                             |                          |             | 15                  | 1                  |       |
|             |          |       |                   |       |     | 6        | 16          | 557.31                                                   | 1112.6          | 1112.6   | 0     | 0    | 33         | 0.0401826 | R.QVVNFGPGPAK.L             |                          |             |                     | 19.49              |       |
|             |          |       |                   |       |     | 52       | 61          | 593.34                                                   | 1184.66         | 1184.65  | 0.01  | 0    | 56         | 0.0002187 | K.IINNTENLV.R               |                          |             |                     | 18.97              |       |
| accession # | coverage | score | distinct peptides | mass  | pl  | start AA | end AA      | m/z obs                                                  | M obs           | M calc   | delta | miss | pept score | exp val   | peptide                     | modifications            | retent time | Strongest gel slice | # gel slices found |       |
| P04406      | 16%      | 264   | 5                 | 36201 | 8.6 | P04406   | G3P_HUMAN   | Glyceraldehyde-3-phosphate dehydrogenase                 | OS=Homo sapiens | GN=GAPDH | PE=1  | SV=3 |            |           |                             |                          |             | 16                  | 1                  |       |
|             |          |       |                   |       |     | 67       | 80          | 807.4                                                    | 1612.78         | 1612.89  | -0.11 | 0    | 64         | 2.50E-05  | K.LVINGNPITIFQER.D          |                          |             |                     | 23.38              |       |
|             |          |       |                   |       |     | 67       | 84          | 680.99                                                   | 2039.96         | 2040.1   | -0.14 | 1    | 35         | 0.0185348 | K.LVINGNPITIFQERDPSK.I      |                          |             |                     | 22.64              |       |
|             |          |       |                   |       |     | 201      | 215         | 706.36                                                   | 1410.7          | 1410.78  | -0.08 | 0    | 55         | 0.0002005 | R.GALQNIIPASTGAAK.A         |                          |             |                     | 21.07              |       |
|             |          |       |                   |       |     | 235      | 248         | 765.86                                                   | 1529.71         | 1529.79  | -0.08 | 0    | 49         | 0.0009322 | R.VPTANVSVVDLTCR.L          |                          |             |                     | 21.46              |       |
|             |          |       |                   |       |     | 264      | 271         | 415.2                                                    | 828.38          | 828.43   | -0.05 | 0    | 61         | 7.73E-05  | K.QASEGPLK.G                |                          |             |                     | 13.18              |       |
| accession # | coverage | score | distinct peptides | mass  | pl  | start AA | end AA      | m/z obs                                                  | M obs           | M calc   | delta | miss | pept score | exp val   | peptide                     | modifications            | retent time | Strongest gel slice | # gel slices found |       |



| accession # | coverage | score | distinct peptides | mass  | pl  | start AA | end AA      | m/z obs                                 | M obs           | M calc   | delta   | miss    | pept score | exp val | peptide | modifications           | retent time         | Strongest gel slice | # gel slices found |
|-------------|----------|-------|-------------------|-------|-----|----------|-------------|-----------------------------------------|-----------------|----------|---------|---------|------------|---------|---------|-------------------------|---------------------|---------------------|--------------------|
| P07355      | 14%      | 237   | 5                 | 38808 | 7.6 | P07355   | ANXA2_HUMAN | Annexin A2                              | OS=Homo sapiens | GN=ANXA2 | PE=1    | SV=2    |            |         |         | Acetyl (Protein N-term) | 16                  | 1                   |                    |
|             |          |       |                   |       |     |          |             | 2                                       | 10              | 564.76   | 1127.51 | 1127.56 | -0.06      | 0       | 35      | 0.0270681               | M.STVHEILCK.L       | 20.68               |                    |
|             |          |       |                   |       |     |          |             | 38                                      | 47              | 544.28   | 1086.54 | 1086.59 | -0.06      | 0       | 46      | 0.0024906               | R.DALNIETAIK.T      | 21.42               |                    |
|             |          |       |                   |       |     |          |             | 69                                      | 77              | 556.25   | 1110.49 | 1110.55 | -0.05      | 0       | 47      | 0.0012298               | R.QDIAFAYQR.R       | 20.59               |                    |
|             |          |       |                   |       |     |          |             | 136                                     | 145             | 622.78   | 1243.55 | 1243.62 | -0.07      | 0       | 55      | 0.0002483               | R.TNQLQEIINR.V      | 16.13               |                    |
|             |          |       |                   |       |     |          |             | 158                                     | 168             | 613.25   | 1224.48 | 1224.56 | -0.08      | 0       | 54      | 0.0002536               | K.DIISDTSGDGFR.K    | 21.59               |                    |
| P04083      | 13%      | 204   | 4                 | 38918 | 6.6 | P04083   | ANXA1_HUMAN | Annexin A1                              | OS=Homo sapiens | GN=ANXA1 | PE=1    | SV=2    |            |         |         |                         |                     | 16                  | 1                  |
|             |          |       |                   |       |     |          |             | 114                                     | 124             | 631.75   | 1261.49 | 1261.59 | -0.1       | 0       | 61      | 6.56E-05                | K.TPAQFDADDEL.R.A   | 20.55               |                    |
|             |          |       |                   |       |     |          |             | 167                                     | 177             | 607.24   | 1212.47 | 1212.53 | -0.06      | 0       | 60      | 8.13E-05                | K.DITSDTSGDGR.N     | 20.16               |                    |
|             |          |       |                   |       |     |          |             | 215                                     | 228             | 775.87   | 1549.72 | 1549.81 | -0.09      | 0       | 43      | 0.0031185               | K.GTDVNVFNTLITTR.S  | 23.55               |                    |
|             |          |       |                   |       |     |          |             | 304                                     | 312             | 540.71   | 1079.41 | 1079.48 | -0.08      | 0       | 42      | 0.0043911               | R.SEIDMNDIK.A       | 14.7                |                    |
| Q14847      | 10%      | 171   | 3                 | 30097 | 6.6 | Q14847   | LASP1_HUMAN | LIM and SH3 domain protein 1            | OS=Homo sapiens | GN=LASP1 | PE=1    | SV=2    |            |         |         |                         |                     | 16                  | 1                  |
|             |          |       |                   |       |     |          |             | 74                                      | 85              | 481.9    | 1442.69 | 1442.78 | -0.09      | 1       | 63      | 3.56E-05                | R.LKQQSELQSQVR.Y    | 13.79               |                    |
|             |          |       |                   |       |     |          |             | 76                                      | 85              | 601.78   | 1201.55 | 1201.61 | -0.06      | 0       | 43      | 0.003953                | K.QQSELQSQVR.Y      | 13.92               |                    |
|             |          |       |                   |       |     |          |             | 97                                      | 109             | 709.84   | 1417.66 | 1417.72 | -0.06      | 0       | 65      | 2.49E-05                | K.GFSVVDATPELQR.I   | 21.38               |                    |
| P52907      | 9%       | 108   | 2                 | 33073 | 5.5 | P52907   | CAZA1_HUMAN | F-actin-capping protein subunit alpha-1 | OS=Homo sapiens | GN=CAZA1 | PE=1    | SV=3    |            |         |         |                         |                     | 16                  | 1                  |
|             |          |       |                   |       |     |          |             | 38                                      | 47              | 599.33   | 1196.64 | 1196.69 | -0.05      | 0       | 66      | 1.60E-05                | R.LLLNNDNLLR.E      | 21.9                |                    |
|             |          |       |                   |       |     |          |             | 104                                     | 118             | 771.8    | 1541.59 | 1541.68 | -0.09      | 0       | 41      | 0.0050256               | K.EASDPQPEEADGGLK.S | 15.22               |                    |
| P05388      | 7%       | 97    | 2                 | 34423 | 5.7 | P05388   | RLA0_HUMAN  | 60S acidic ribosomal protein P0         | OS=Homo sapiens | GN=RPLP0 | PE=1    | SV=1    |            |         |         |                         |                     | 16                  | 1                  |
|             |          |       |                   |       |     |          |             | 84                                      | 92              | 484.74   | 967.46  | 967.51  | -0.05      | 0       | 33      | 0.028651                | R.GNVGFVFTK.E       | 21.33               |                    |
|             |          |       |                   |       |     |          |             | 135                                     | 146             | 657.32   | 1312.63 | 1312.7  | -0.07      | 0       | 63      | 3.36E-05                | K.TSFFQALGITTK.I    | 23.95               |                    |
| Q15084      | 6%       | 89    | 2                 | 48490 | 5   | Q15084   | PDI6_HUMAN  | Protein disulfide-isomerase A6          | OS=Homo sapiens | GN=PDI6  | PE=1    | SV=1    |            |         |         |                         |                     | 16                  | 2                  |
|             |          |       |                   |       |     |          |             | 217                                     | 231             | 764.38   | 1526.74 | 1526.84 | -0.1       | 0       | 40      | 0.0058109               | K.LAAVDATVNVQLASR.Y | 22.25               |                    |
|             |          |       |                   |       |     |          |             | 374                                     | 386             | 742.32   | 1482.63 | 1482.71 | -0.08      | 0       | 49      | 0.0008714               | K.GSFEQGINFLR.E     | 22.55               |                    |
| P40925      | 6%       | 89    | 2                 | 36631 | 6.9 | P40925   | MDHC_HUMAN  | Malate dehydrogenase, cytoplasmic       | OS=Homo sapiens | GN=MDH1  | PE=1    | SV=4    |            |         |         |                         |                     | 16                  | 1                  |
|             |          |       |                   |       |     |          |             | 171                                     | 179             | 458.72   | 915.43  | 915.5   | -0.07      | 0       | 49      | 0.0011511               | K.LGVTANDVK.N       | 14.91               |                    |
|             |          |       |                   |       |     |          |             | 299                                     | 310             | 697.33   | 1392.64 | 1392.7  | -0.07      | 0       | 40      | 0.0067445               | K.FVEGLPINDFSR.E    | 22.59               |                    |
| P07195      | 21%      | 304   | 6                 | 36900 | 5.7 | P07195   | LDHB_HUMAN  | L-lactate dehydrogenase B chain         | OS=Homo sapiens | GN=LDHB  | PE=1    | SV=2    |            |         |         |                         |                     | 17                  | 1                  |
|             |          |       |                   |       |     |          |             | 8                                       | 23              | 847.96   | 1693.9  | 1693.89 | 0.01       | 0       | 54      | 0.0002472               | K.LIAPVAEEETVPNNK.I | 20.03               |                    |
|             |          |       |                   |       |     |          |             | 78                                      | 91              | 504.26   | 1509.76 | 1509.77 | -0.01      | 1       | 31      | 0.0448065               | K.IVADKDYVTANSK.I   | 14.06               |                    |
|             |          |       |                   |       |     |          |             | 108                                     | 113             | 371.73   | 741.44  | 741.45  | -0.01      | 0       | 38      | 0.0104138               | R.LNLVQR.N          | 16.09               |                    |
|             |          |       |                   |       |     |          |             | 159                                     | 170             | 624.82   | 1247.63 | 1247.59 | 0.03       | 0       | 77      | 1.64E-06                | R.VIGSGCNLDSAR.F    | 15.2                |                    |
|             |          |       |                   |       |     |          |             | 234                                     | 244             | 642.32   | 1282.63 | 1282.65 | -0.02      | 0       | 46      | 0.001489                | K.MVVESAYEVIK.L     | 20.2                |                    |
|             |          |       |                   |       |     |          |             | 309                                     | 319             | 429.57   | 1285.7  | 1285.72 | -0.02      | 2       | 58      | 0.0001221               | K.LKDDEVAQLKK.S     | 13.53               |                    |
| P00338      | 15%      | 251   | 5                 | 36950 | 8.4 | P00338   | LDHA_HUMAN  | L-lactate dehydrogenase A chain         | OS=Homo sapiens | GN=LDHA  | PE=1    | SV=2    |            |         |         |                         |                     | 17                  | 1                  |
|             |          |       |                   |       |     |          |             | 77                                      | 90              | 499.26   | 1494.75 | 1494.77 | -0.02      | 1       | 40      | 0.0070942               | K.IVSGKDYVNTANSK.L  | 13.66               |                    |
|             |          |       |                   |       |     |          |             | 91                                      | 99              | 457.28   | 912.56  | 912.58  | -0.02      | 0       | 43      | 0.0035626               | K.LVIITAGAR.Q       | 20.16               |                    |
|             |          |       |                   |       |     |          |             | 107                                     | 112             | 371.73   | 741.44  | 741.45  | -0.01      | 0       | 38      | 0.0104138               | R.LNLVQR.N          | 16.09               |                    |
|             |          |       |                   |       |     |          |             | 158                                     | 169             | 624.82   | 1247.63 | 1247.59 | 0.03       | 0       | 77      | 1.64E-06                | R.VIGSGCNLDSAR.F    | 15.2                |                    |
|             |          |       |                   |       |     |          |             | 306                                     | 315             | 567.78   | 1133.55 | 1133.56 | 0          | 0       | 53      | 0.0003393               | K.VTLTSEEEAR.L      | 14.63               |                    |
| P29692      | 8%       | 120   | 2                 | 31217 | 4.9 | P29692   | EF1D_HUMAN  | Elongation factor 1-delta               | OS=Homo sapiens | GN=EEF1D | PE=1    | SV=5    |            |         |         |                         |                     | 17                  | 1                  |
|             |          |       |                   |       |     |          |             | 39                                      | 48              | 543.8    | 1085.59 | 1085.58 | 0          | 0       | 60      | 7.45E-05                | R.QENGASVILR.D      | 18.59               |                    |
|             |          |       |                   |       |     |          |             | 84                                      | 95              | 679.87   | 1357.72 | 1357.72 | 0          | 0       | 59      | 8.94E-05                | R.IASLEVENQSLR.G    | 19.98               |                    |
| P09525      | 17%      | 285   | 5                 | 36088 | 5.8 | P09525   | ANXA4_HUMAN | Annexin A4                              | OS=Homo sapiens | GN=ANXA4 | PE=1    | SV=4    |            |         |         |                         |                     | 18                  | 1                  |
|             |          |       |                   |       |     |          |             | 10                                      | 24              | 799.35   | 1596.69 | 1596.72 | -0.03      | 0       | 76      | 1.72E-06                | K.AASGFNAMEDAQLTR.K | 19.48               |                    |
|             |          |       |                   |       |     |          |             | 142                                     | 150             | 567.74   | 1133.47 | 1133.48 | -0.01      | 0       | 38      | 0.0112123               | R.SDTSFMFQR.V       | 19.75               |                    |
|             |          |       |                   |       |     |          |             | 151                                     | 160             | 479.79   | 957.57  | 957.56  | 0          | 0       | 38      | 0.0152035               | R.VLVLSLAGGR.D      | 19.83               |                    |
|             |          |       |                   |       |     |          |             | 260                                     | 270             | 587.81   | 1173.61 | 1173.6  | 0.01       | 0       | 65      | 2.56E-05                | K.GLGTDDNTLIR.V     | 19.88               |                    |
|             |          |       |                   |       |     |          |             | 276                                     | 284             | 546.28   | 1090.54 | 1090.53 | 0          | 0       | 69      | 1.08E-05                | R.AEIDMLDIR.A       | 20.44               |                    |
| P06753      | 15%      | 261   | 5                 | 32856 | 4.7 | P06753   | TPM3_HUMAN  | Tropomyosin alpha-3 chain               | OS=Homo sapiens | GN=TPM3  | PE=1    | SV=1    |            |         |         |                         |                     | 18                  | 1                  |
|             |          |       |                   |       |     |          |             | 78                                      | 90              | 658.82   | 1315.62 | 1315.64 | -0.01      | 0       | 48      | 0.0012661               | K.AADAEAEVASLNR.R   | 18.49               |                    |
|             |          |       |                   |       |     |          |             | 78                                      | 91              | 491.58   | 1471.73 | 1471.74 | -0.01      | 1       | 42      | 0.0040082               | K.AADAEAEVASLNR.R.I | 15.66               |                    |
|             |          |       |                   |       |     |          |             | 92                                      | 101             | 622.33   | 1242.65 | 1242.65 | 0          | 0       | 80      | 6.56E-07                | R.IQLVEELDR.A       | 20.7                |                    |
|             |          |       |                   |       |     |          |             | 141                                     | 149             | 574.3    | 1146.58 | 1146.6  | -0.02      | 0       | 50      | 0.0007405               | K.MELQEIQLK.E       | 20.14               |                    |
|             |          |       |                   |       |     |          |             | 169                                     | 178             | 578.84   | 1155.67 | 1155.65 | 0.02       | 0       | 41      | 0.0057083               | K.LVIIEGDLER.T      | 20.88               |                    |

| accession # | coverage | score | distinct peptides | mass  | pl   | start AA           | end AA                                          | m/z obs                               | M obs                                                              | M calc                                                               | delta                                                                | miss                                                                | pept score                                                          | exp val                                                        | peptide                                  | modifications | retent time | Strongest gel slice | # gel slices found |    |   |
|-------------|----------|-------|-------------------|-------|------|--------------------|-------------------------------------------------|---------------------------------------|--------------------------------------------------------------------|----------------------------------------------------------------------|----------------------------------------------------------------------|---------------------------------------------------------------------|---------------------------------------------------------------------|----------------------------------------------------------------|------------------------------------------|---------------|-------------|---------------------|--------------------|----|---|
| P67936      | 15%      | 192   | 4                 | 28619 | 4.7  | P67936 TPM4_HUMAN  | Tropomyosin alpha-4 chain                       | OS=Homo sapiens GN=TPM4 PE=1 SV=3     | 45 54 508.27 1014.53 1014.51 0.02 0 37 0.0186102 K.AEGDVAALNR.R    | 56 65 622.33 1242.65 1242.65 0 0 80 6.56E-07 R.IQLVEEELDR.A          | 105 113 591.28 1180.55 1180.55 0 0 36 0.0168963 K.MEIQEMQLK.E        | 216 223 481.74 961.46 961.46 0 0 40 0.0079505 K.TIDDLEEK.L          | 2 Oxidation (M)                                                     |                                                                |                                          |               | 18          | 1                   |                    |    |   |
| accession # | coverage | score | distinct peptides | mass  | pl   | start AA           | end AA                                          | m/z obs                               | M obs                                                              | M calc                                                               | delta                                                                | miss                                                                | pept score                                                          | exp val                                                        | peptide                                  | modifications | retent time | Strongest gel slice | # gel slices found |    |   |
| P36543      | 9%       | 106   | 2                 | 26186 | 7.7  | P36543 VATE1_HUMAN | Vacuolar proton pump subunit E 1                | OS=Homo sapiens GN=ATP6V1E1 PE=1 SV=1 | 2 10 494.75 987.48 987.49 -0.01 0 40 0.008313 M.ALSDADVQK.Q        | 70 80 669.31 1336.61 1336.62 -0.02 0 66 1.76E-05 K.IQMSNLMNQAR.L     | 2 Acetyl (Protein N-term)                                            |                                                                     |                                                                     |                                                                |                                          | 19.01         | 18          | 1                   |                    |    |   |
| accession # | coverage | score | distinct peptides | mass  | pl   | start AA           | end AA                                          | m/z obs                               | M obs                                                              | M calc                                                               | delta                                                                | miss                                                                | pept score                                                          | exp val                                                        | peptide                                  | modifications | retent time | Strongest gel slice | # gel slices found |    |   |
| P47756      | 9%       | 132   | 2                 | 31616 | 5.4  | P47756 CAPZB_HUMAN | F-actin-capping protein subunit beta            | OS=Homo sapiens GN=CAPZB PE=1 SV=4    | 182 195 677.32 1352.63 1352.64 0 0 96 1.77E-08 K.SGSGTMNLGGSLTR.Q  | 216 225 421.54 1261.61 1261.63 -0.02 1 36 0.0198697 R.LVEDMENKIR.S   | 2 Oxidation (M)                                                      |                                                                     |                                                                     |                                                                |                                          | 15.4          | 18          | 1                   |                    |    |   |
| accession # | coverage | score | distinct peptides | mass  | pl   | start AA           | end AA                                          | m/z obs                               | M obs                                                              | M calc                                                               | delta                                                                | miss                                                                | pept score                                                          | exp val                                                        | peptide                                  | modifications | retent time | Strongest gel slice | # gel slices found |    |   |
| A6NL28      | 7%       | 90    | 2                 | 26595 | 4.5  | A6NL28 TPM3L_HUMAN | Putative tropomyosin alpha-3 chain-like protein | OS=Homo sapiens PE=5 SV=2             | 80 88 574.3 1146.58 1146.6 -0.02 0 50 0.0007405 K.MELQEIQLK.E      | 138 144 439.22 876.43 876.44 0 0 40 0.0084428 R.LMDQNLK.C            | 2 Oxidation (M)                                                      |                                                                     |                                                                     |                                                                |                                          | 20.14         | 18          | 1                   |                    |    |   |
| accession # | coverage | score | distinct peptides | mass  | pl   | start AA           | end AA                                          | m/z obs                               | M obs                                                              | M calc                                                               | delta                                                                | miss                                                                | pept score                                                          | exp val                                                        | peptide                                  | modifications | retent time | Strongest gel slice | # gel slices found |    |   |
| O15144      | 6%       | 84    | 2                 | 34426 | 6.8  | O15144 ARPC2_HUMAN | Actin-related protein 2/3 complex subunit 2     | OS=Homo sapiens GN=ARPC2 PE=1 SV=1    | 1 9 559.3 1116.59 1116.6 -0.01 0 40 0.0077027 -.MILLEVNNR.I        | 10 18 515.3 1028.59 1028.61 -0.02 0 44 0.0032614 R.IIETLALK.F        | 2 Oxidation (M)                                                      |                                                                     |                                                                     |                                                                |                                          | 20.09         | 18          | 1                   |                    |    |   |
| accession # | coverage | score | distinct peptides | mass  | pl   | start AA           | end AA                                          | m/z obs                               | M obs                                                              | M calc                                                               | delta                                                                | miss                                                                | pept score                                                          | exp val                                                        | peptide                                  | modifications | retent time | Strongest gel slice | # gel slices found |    |   |
| O00299      | 15%      | 159   | 3                 | 27248 | 5.1  | O00299 CLIC1_HUMAN | Chloride intracellular channel protein 1        | OS=Homo sapiens GN=CLIC1 PE=1 SV=4    | 2 13 729.84 1457.66 1457.74 -0.08 0 39 0.0085806 M.AEEQPQVELFVK.A  | 38 49 641.31 1280.6 1280.66 -0.06 0 63 3.03E-05 K.GVTFNVTVDTK.R      | 120 131 664.79 1327.57 1327.64 -0.07 0 57 0.0001593 K.NSNPALNDNLEK.G | 2 Acetyl (Protein N-term)                                           |                                                                     |                                                                |                                          |               | 23.1        | 19                  | 1                  |    |   |
| accession # | coverage | score | distinct peptides | mass  | pl   | start AA           | end AA                                          | m/z obs                               | M obs                                                              | M calc                                                               | delta                                                                | miss                                                                | pept score                                                          | exp val                                                        | peptide                                  | modifications | retent time | Strongest gel slice | # gel slices found |    |   |
| P62701      | 10%      | 150   | 3                 | 29807 | 10.2 | P62701 RS4X_HUMAN  | 40S ribosomal protein S4, X isoform             | OS=Homo sapiens GN=RPS4X PE=1 SV=2    | 192 198 386.72 771.42 771.46 -0.04 0 41 0.0085601 R.IGVITNR.E      | 212 221 526.73 1051.44 1051.47 -0.03 0 54 0.0002426 K.DANGNSFATR.L   | 222 230 495.77 989.52 989.59 -0.07 0 55 0.0002627 R.LSNIFVIGK.G      |                                                                     |                                                                     |                                                                |                                          | 15.07         | 19          | 1                   |                    |    |   |
| accession # | coverage | score | distinct peptides | mass  | pl   | start AA           | end AA                                          | m/z obs                               | M obs                                                              | M calc                                                               | delta                                                                | miss                                                                | pept score                                                          | exp val                                                        | peptide                                  | modifications | retent time | Strongest gel slice | # gel slices found |    |   |
| P23396      | 9%       | 82    | 2                 | 26842 | 9.7  | P23396 RS3_HUMAN   | 40S ribosomal protein S3                        | OS=Homo sapiens GN=RPS3 PE=1 SV=2     | 19 27 546.76 1091.5 1091.56 -0.06 0 33 0.0333647 K.AELNEFLTR.E     | 215 227 735.85 1469.69 1469.76 -0.07 0 49 0.000905 K.DEILPTTPISEKQ.G |                                                                      |                                                                     |                                                                     |                                                                | 21.58                                    | 19            | 1           |                     |                    |    |   |
| accession # | coverage | score | distinct peptides | mass  | pl   | start AA           | end AA                                          | m/z obs                               | M obs                                                              | M calc                                                               | delta                                                                | miss                                                                | pept score                                                          | exp val                                                        | peptide                                  | modifications | retent time | Strongest gel slice | # gel slices found |    |   |
| P63104      | 27%      | 376   | 6                 | 27899 | 4.7  | P63104 I433Z_HUMAN | 14-3-3 protein zeta/delta                       | OS=Homo sapiens GN=YWHAZ PE=1 SV=1    | 1 9 581.8 1161.59 1161.57 0.02 1 65 2.57E-05 -.MDKNELVQK.A         | 28 41 774.86 1547.72 1547.71 0.01 0 114 2.61E-10 K.SVTEQGAELSNEER.N  | 42 49 454.27 906.52 906.52 0 0 45 0.0023659 R.NLLSVAYK.N             | 104 115 652.85 1303.68 1303.68 0.01 0 56 0.0001942 K.FLIPNASQAESK.V | 128 139 427.22 1278.64 1278.65 -0.01 1 44 0.0026798 R.YLAEVAAGDDK.K | 213 222 603.33 1204.65 1204.65 0 0 52 0.0005279 K.DSTLIMQLLR.D | 2 Acetyl (Protein N-term); Oxidation (M) |               |             |                     | 13.55              | 20 | 2 |
| accession # | coverage | score | distinct peptides | mass  | pl   | start AA           | end AA                                          | m/z obs                               | M obs                                                              | M calc                                                               | delta                                                                | miss                                                                | pept score                                                          | exp val                                                        | peptide                                  | modifications | retent time | Strongest gel slice | # gel slices found |    |   |
| P31946      | 25%      | 313   | 6                 | 28179 | 4.8  | P31946 I433B_HUMAN | 14-3-3 protein beta/alpha                       | OS=Homo sapiens GN=YWHAB PE=1 SV=3    | 2 11 618.81 1235.61 1235.61 0 1 43 0.0037968 M.TMDKSELVQK.A        | 30 43 533.59 1597.74 1597.73 0 0 64 2.43E-05 K.AVTEQGHLSNEER.N       | 44 51 454.27 906.52 906.52 0 0 45 0.0023659 R.NLLSVAYK.N             | 63 70 452.26 902.5 902.51 0 0 48 0.0015351 R.VISSIEQK.T             | 130 140 591.79 1181.56 1181.56 0 0 62 3.88E-05 R.YLSEVASGDNK.Q      | 215 224 603.33 1204.65 1204.65 0 0 52 0.0005279 K.DSTLIMQLLR.D | 2 Acetyl (Protein N-term); Oxidation (M) |               |             |                     | 13.77              | 20 | 1 |
| accession # | coverage | score | distinct peptides | mass  | pl   | start AA           | end AA                                          | m/z obs                               | M obs                                                              | M calc                                                               | delta                                                                | miss                                                                | pept score                                                          | exp val                                                        | peptide                                  | modifications | retent time | Strongest gel slice | # gel slices found |    |   |
| P61981      | 24%      | 294   | 6                 | 28456 | 4.8  | P61981 I433G_HUMAN | 14-3-3 protein gamma                            | OS=Homo sapiens GN=YWHAG PE=1 SV=2    | 2 10 578.82 1155.63 1155.62 0.01 1 38 0.0121761 M.VDREQLVQK.A      | 29 42 822.4 1642.79 1642.78 0.01 0 77 1.16E-06 K.NVTLENEPLSNEER.N    | 43 50 454.27 906.52 906.52 0 0 45 0.0023659 R.NLLSVAYK.N             | 62 69 452.26 902.5 902.51 0 0 48 0.0015351 R.VISSIEQK.T             | 133 142 540.78 1079.55 1079.55 0 0 34 0.0241783 R.YLAEVATGEK.R      | 218 227 603.33 1204.65 1204.65 0 0 52 0.0005279 K.DSTLIMQLLR.D | 2 Acetyl (Protein N-term)                |               |             |                     | 17.06              | 20 | 1 |
| accession # | coverage | score | distinct peptides | mass  | pl   | start AA           | end AA                                          | m/z obs                               | M obs                                                              | M calc                                                               | delta                                                                | miss                                                                | pept score                                                          | exp val                                                        | peptide                                  | modifications | retent time | Strongest gel slice | # gel slices found |    |   |
| P30040      | 18%      | 279   | 4                 | 29032 | 6.8  | P30040 ERP29_HUMAN | Endoplasmic reticulum protein ERp29             | OS=Homo sapiens GN=ERP29 PE=1 SV=4    | 37 48 662.84 1323.67 1323.71 -0.03 0 51 0.0005519 K.GALPLDVTIFYK.V | 183 192 538.27 1074.52 1074.53 -0.01 0 92 5.07E-08 K.QGQDNLSSVK.E    | 209 223 862.91 1723.8 1723.77 0.03 0 68 9.90E-06 K.ILDQGEDFPAEMTR.I  | 244 253 567.84 1133.67 1133.64 0.03 0 68 1.25E-05 K.SLNILTAFOK.K    | 2 Oxidation (M)                                                     |                                                                |                                          |               | 21.86       | 20                  | 1                  |    |   |
| accession # | coverage | score | distinct peptides | mass  | pl   | start AA           | end AA                                          | m/z obs                               | M obs                                                              | M calc                                                               | delta                                                                | miss                                                                | pept score                                                          | exp val                                                        | peptide                                  | modifications | retent time | Strongest gel slice | # gel slices found |    |   |
| P27348      | 16%      | 226   | 4                 | 28032 | 4.7  | P27348 I433T_HUMAN | 14-3-3 protein theta                            | OS=Homo sapiens GN=YWHAQ PE=1 SV=1    |                                                                    |                                                                      |                                                                      |                                                                     |                                                                     |                                                                |                                          |               | 20          | 1                   |                    |    |   |

| accession # | coverage | score | distinct peptides | mass  | pl   | start AA            | end AA                                              | m/z obs | M obs   | M calc  | delta | miss | pept score | exp val   | peptide               | modifications            | retent time | Strongest gel slice | # gel slices found |
|-------------|----------|-------|-------------------|-------|------|---------------------|-----------------------------------------------------|---------|---------|---------|-------|------|------------|-----------|-----------------------|--------------------------|-------------|---------------------|--------------------|
|             |          |       |                   |       |      |                     |                                                     |         |         |         |       |      |            |           |                       |                          |             |                     |                    |
|             |          |       |                   |       |      | 28                  | 41                                                  | 766.87  | 1531.72 | 1531.71 | 0.01  | 0    | 82         | 4.71E-07  | K.AVTEQGAELSNEER.N    |                          |             |                     | 14.77              |
|             |          |       |                   |       |      | 42                  | 49                                                  | 454.27  | 906.52  | 906.52  | 0     | 0    | 45         | 0.0023659 | R.NLLSVAYK.N          |                          |             |                     | 20.36              |
|             |          |       |                   |       |      | 61                  | 68                                                  | 452.26  | 902.5   | 902.51  | 0     | 0    | 48         | 0.0015351 | R.VISSIEQK.T          |                          |             |                     | 13.68              |
|             |          |       |                   |       |      | 213                 | 222                                                 | 603.33  | 1204.65 | 1204.65 | 0     | 0    | 52         | 0.0005279 | K.DSTLIMQLLR.D        | Oxidation (M)            |             |                     | 23.08              |
| P07339      | 11%      | 210   | 5                 | 45037 | 6.1  | P07339 CATD_HUMAN   | Cathepsin D                                         |         |         |         |       |      |            |           |                       |                          |             |                     |                    |
|             |          |       |                   |       |      | 177                 | 184                                                 | 440.24  | 878.47  | 878.45  | 0.02  | 0    | 45         | 0.0024983 | R.QVFGKATK.Q          |                          |             |                     | 14.16              |
|             |          |       |                   |       |      | 177                 | 194                                                 | 636.03  | 1905.06 | 1905.04 | 0.03  | 1    | 45         | 0.0018696 | R.QVFGKATKQGITFIAAK.F |                          |             |                     | 20.63              |
|             |          |       |                   |       |      | 332                 | 341                                                 | 521.83  | 1041.65 | 1041.64 | 0.01  | 0    | 42         | 0.0048035 | K.VSTLPAITLK.L        |                          |             |                     | 20.67              |
|             |          |       |                   |       |      | 349                 | 357                                                 | 533.28  | 1064.54 | 1064.54 | 0     | 0    | 40         | 0.0067828 | K.LSPEDYTLK.V         |                          |             |                     | 20.1               |
|             |          |       |                   |       |      | 404                 | 411                                                 | 410.72  | 819.42  | 819.42  | -0.01 | 0    | 38         | 0.0133185 | R.VGFAEAAAR.L         |                          |             |                     | 15.24              |
| P26373      | 9%       | 76    | 2                 | 24304 | 11.7 | P26373 R13_HUMAN    | 60S ribosomal protein L13                           |         |         |         |       |      |            |           |                       |                          |             |                     |                    |
|             |          |       |                   |       |      | 75                  | 82                                                  | 475.76  | 949.5   | 949.49  | 0.01  | 0    | 37         | 0.0140291 | R.GFSLLELR.V          |                          |             |                     | 21.33              |
|             |          |       |                   |       |      | 106                 | 116                                                 | 616.81  | 1231.61 | 1231.62 | 0     | 0    | 39         | 0.0104183 | K.STESLQANVQR.L       |                          |             |                     | 14.38              |
| P45880      | 7%       | 107   | 2                 | 32060 | 7.5  | P45880 VDAC2_HUMAN  | Voltage-dependent anion-selective channel protein 2 |         |         |         |       |      |            |           |                       |                          |             |                     |                    |
|             |          |       |                   |       |      | 236                 | 247                                                 | 647.34  | 1292.67 | 1292.66 | 0.01  | 0    | 50         | 0.0006823 | K.YQLDPTASISAK.V      |                          |             |                     | 20.06              |
|             |          |       |                   |       |      | 268                 | 277                                                 | 508.81  | 1015.62 | 1015.59 | 0.02  | 0    | 56         | 0.0002055 | K.LTLSALVDGK.S        |                          |             |                     | 21.42              |
| P00918      | 7%       | 99    | 2                 | 29285 | 6.9  | P00918 CAH2_HUMAN   | Carbonic anhydrase 2                                |         |         |         |       |      |            |           |                       |                          |             |                     |                    |
|             |          |       |                   |       |      | 159                 | 167                                                 | 494.28  | 986.55  | 986.56  | -0.01 | 0    | 46         | 0.0024045 | K.VVDVLSIK.T          |                          |             |                     | 21.02              |
|             |          |       |                   |       |      | 172                 | 181                                                 | 585.27  | 1168.53 | 1168.51 | 0.02  | 0    | 53         | 0.000328  | K.SADFTNFDPR.G        |                          |             |                     | 20.45              |
| P04792      | 13%      | 166   | 3 (4)             | 22826 | 6    | P04792 HSPB1_HUMAN  | Heat shock protein beta-1                           |         |         |         |       |      |            |           |                       |                          |             |                     |                    |
|             |          |       |                   |       |      | 80                  | 89                                                  | 529.78  | 1057.55 | 1057.54 | 0.01  | 0    | 62         | 5.96E-05  | R.QLSSGVSEIR.H        | Gln->pyro-Glu (N-term Q) |             |                     | 20.49              |
|             |          |       |                   |       |      | 80                  | 89                                                  | 538.4   | 1074.79 | 1074.57 | 0.22  | 0    | 70         | 6.40E-06  | R.QLSSGVSEIR.H        |                          |             |                     | 16.33              |
|             |          |       |                   |       |      | 189                 | 198                                                 | 471.27  | 940.53  | 940.5   | 0.03  | 0    | 53         | 0.0003101 | R.AQLGGPEAAK.S        |                          |             |                     | 12.95              |
|             |          |       |                   |       |      | 189                 | 205                                                 | 548.61  | 1642.82 | 1642.82 | 0     | 1    | 44         | 0.0027423 | R.AQLGGPEAAKSDETAAL.- |                          |             |                     | 13.02              |
| P52566      | 10%      | 97    | 2                 | 23031 | 5.1  | P52566 GDIR2_HUMAN  | Rho GDP-dissociation inhibitor 2                    |         |         |         |       |      |            |           |                       |                          |             |                     |                    |
|             |          |       |                   |       |      | 51                  | 63                                                  | 656.31  | 1310.6  | 1310.71 | -0.11 | 0    | 56         | 0.0001533 | K.TLLGDGPVVTPDK.A     |                          |             |                     | 20.97              |
|             |          |       |                   |       |      | 64                  | 71                                                  | 428.23  | 854.44  | 854.5   | -0.06 | 0    | 41         | 0.0051123 | K.APNVVVTR.L          |                          |             |                     | 14.2               |
| Q06830      | 44%      | 479   | 10 (11)           | 22324 | 8.3  | Q06830 PRDX1_HUMAN  | Peroxiredoxin-1                                     |         |         |         |       |      |            |           |                       |                          |             |                     |                    |
|             |          |       |                   |       |      | 17                  | 27                                                  | 590.79  | 1179.57 | 1179.56 | 0.01  | 0    | 48         | 0.0011233 | K.ATAVMPDGQFK.D       | Oxidation (M)            |             |                     | 16.73              |
|             |          |       |                   |       |      | 28                  | 35                                                  | 470.74  | 939.47  | 939.45  | 0.01  | 0    | 33         | 0.0304928 | K.DISLSDYK.G          |                          |             |                     | 20.21              |
|             |          |       |                   |       |      | 93                  | 110                                                 | 481.52  | 1922.03 | 1922.04 | -0.01 | 2    | 37         | 0.0121651 | K.KQGLGPMNIPLVDPKR.T  | Oxidation (M)            |             |                     | 19.73              |
|             |          |       |                   |       |      | 94                  | 109                                                 | 819.93  | 1637.85 | 1637.84 | 0     | 0    | 47         | 0.0013004 | K.QGGLGPMNIPLVDPKR.T  | Oxidation (M)            |             |                     | 20.86              |
|             |          |       |                   |       |      | 94                  | 110                                                 | 599     | 1793.97 | 1793.95 | 0.02  | 1    | 43         | 0.003348  | K.QGGLGPMNIPLVDPKR.T  | Oxidation (M)            |             |                     | 20.34              |
|             |          |       |                   |       |      | 111                 | 120                                                 | 554.32  | 1106.62 | 1106.6  | 0.02  | 0    | 69         | 8.30E-06  | R.TIAQDYGVLR.K        |                          |             |                     | 20.12              |
|             |          |       |                   |       |      | 129                 | 140                                                 | 680.4   | 1358.79 | 1358.79 | 0     | 1    | 41         | 0.0063929 | R.GLFIDDKGILR.Q       |                          |             |                     | 21.95              |
|             |          |       |                   |       |      | 141                 | 151                                                 | 597.85  | 1193.68 | 1193.64 | 0.04  | 0    | 54         | 0.0002642 | R.QITVNDLPVGR.S       | Gln->pyro-Glu (N-term Q) |             |                     | 21.91              |
|             |          |       |                   |       |      | 141                 | 151                                                 | 606.35  | 1210.69 | 1210.67 | 0.03  | 0    | 58         | 0.0001169 | R.QITVNDLPVGR.S       |                          |             |                     | 20.29              |
|             |          |       |                   |       |      | 152                 | 158                                                 | 410.22  | 818.42  | 818.41  | 0.01  | 0    | 45         | 0.0030334 | R.SVDETLR.L           |                          |             |                     | 13.68              |
|             |          |       |                   |       |      | 159                 | 168                                                 | 598.82  | 1195.63 | 1195.62 | 0.01  | 0    | 59         | 8.43E-05  | R.LVQAFQFTDK.H        |                          |             |                     | 20.77              |
| Q9H0U4      | 13%      | 102   | 2                 | 22328 | 5.5  | Q9H0U4 RAB1B_HUMAN  | Ras-related protein Rab-1B                          |         |         |         |       |      |            |           |                       |                          |             |                     |                    |
|             |          |       |                   |       |      | 11                  | 21                                                  | 536.33  | 1070.65 | 1070.63 | 0.01  | 0    | 59         | 9.04E-05  | K.LLLIGDSGVGK.S       |                          |             |                     | 21.08              |
|             |          |       |                   |       |      | 173                 | 187                                                 | 486.58  | 1456.73 | 1456.71 | 0.02  | 0    | 42         | 0.0044786 | R.MGPGAASGGGERPNLK.I  | Oxidation (M)            |             |                     | 13.02              |
| P37802      | 12%      | 87    | 2                 | 22548 | 8.4  | P37802 TAGLN2_HUMAN | Transglutinin-2                                     |         |         |         |       |      |            |           |                       |                          |             |                     |                    |
|             |          |       |                   |       |      | 128                 | 139                                                 | 616.34  | 1230.67 | 1230.68 | -0.01 | 0    | 50         | 0.000765  | R.TLMNLGGLAVAR.D      | Oxidation (M)            |             |                     | 20.64              |
|             |          |       |                   |       |      | 161                 | 171                                                 | 640.31  | 1278.6  | 1278.58 | 0.01  | 0    | 37         | 0.0125343 | R.NFSDNQLQEGK.N       |                          |             |                     | 15.88              |
| P32119      | 11%      | 97    | 2 (3)             | 22049 | 5.7  | P32119 PRDX2_HUMAN  | Peroxiredoxin-2                                     |         |         |         |       |      |            |           |                       |                          |             |                     |                    |
|             |          |       |                   |       |      | 140                 | 150                                                 | 597.85  | 1193.68 | 1193.64 | 0.04  | 0    | 54         | 0.0002642 | R.QITVNDLPVGR.S       | Gln->pyro-Glu (N-term Q) |             |                     | 18.34              |
|             |          |       |                   |       |      | 140                 | 150                                                 | 606.35  | 1210.69 | 1210.67 | 0.03  | 0    | 58         | 0.0001169 | R.QITVNDLPVGR.S       |                          |             |                     | 21.91              |
|             |          |       |                   |       |      | 140                 | 150                                                 | 606.35  | 1210.69 | 1210.67 | 0.03  | 0    | 58         | 0.0001169 | R.QITVNDLPVGR.S       |                          |             |                     | 20.29              |
| P51149      | 10%      | 86    | 2                 | 23760 | 6.4  | P51149 RAB7A_HUMAN  | Ras-related protein Rab-7a                          |         |         |         |       |      |            |           |                       |                          |             |                     |                    |
|             |          |       |                   |       |      | 11                  | 21                                                  | 529.32  | 1056.63 | 1056.62 | 0.01  | 0    | 49         | 0.0009894 | K.VIILGDSGVGK.T       |                          |             |                     | 20.25              |
|             |          |       |                   |       |      | 39                  | 48                                                  | 518.79  | 1035.57 | 1035.56 | 0.01  | 0    | 37         | 0.0156193 | K.ATIGADFLTK.E        |                          |             |                     | 20.91              |
| Q99497      | 7%       | 70    | 2                 | 20050 | 6.3  | Q99497 PARK7_HUMAN  | Protein DJ-1                                        |         |         |         |       |      |            |           |                       |                          |             |                     |                    |
|             |          |       |                   |       |      | 6                   | 12                                                  | 364.26  | 726.51  | 726.5   | 0.01  | 0    | 33         | 0.0249107 | R.ALVLAK.G            |                          |             |                     | 19.94              |
|             |          |       |                   |       |      | 183                 | 189                                                 | 378.23  | 754.45  | 754.46  | -0.01 | 1    | 37         | 0.0120055 | K.APLVLKD.-           |                          |             |                     | 17.08              |

| accession # | coverage | score | distinct peptides | mass  | pl   | start AA | end AA      | m/z obs                                   | M obs           | M calc          | delta     | miss    | pept score | exp val | peptide | modifications | retent time          | Strongest gel slice     | # gel slices found |    |   |
|-------------|----------|-------|-------------------|-------|------|----------|-------------|-------------------------------------------|-----------------|-----------------|-----------|---------|------------|---------|---------|---------------|----------------------|-------------------------|--------------------|----|---|
| P23284      | 22%      | 203   | 4                 | 22785 | 9.3  | P23284   | PPIB_HUMAN  | Peptidyl-prolyl cis-trans isomerase B     | OS=Homo sapiens | GN=PPIB         | PE=1      | SV=1    |            |         |         |               |                      |                         |                    |    |   |
|             |          |       |                   |       |      |          |             | 44                                        | 51              | 430.69          | 859.37    | 859.4   | -0.04      | 0       | 45      | 0.0034048     | R.IGDEDVGR.V         |                         | 13.63              | 25 | 2 |
|             |          |       |                   |       |      |          |             | 64                                        | 76              | 682.83          | 1363.64   | 1363.7  | -0.05      | 0       | 69      | 8.95E-06      | K.TVDNFVALATGEK.G    | Oxidation (M)           | 22.37              |    |   |
|             |          |       |                   |       |      |          |             | 91                                        | 101             | 651.77          | 1301.53   | 1301.57 | -0.05      | 0       | 33      | 0.0371105     | K.DFMIQGGDFTR.G      |                         | 21.59              |    |   |
|             |          |       |                   |       |      |          |             | 138                                       | 150             | 729.34          | 1456.67   | 1456.72 | -0.05      | 0       | 58      | 0.0001047     | K.DTNGSQFFITTVK.T    |                         | 22.15              |    |   |
| O14950      | 12%      | 124   | 2                 | 19824 | 4.7  | O14950   | MRLC2_HUMAN | Myosin regulatory light chain             | MRLC2           | OS=Homo sapiens | GN=MYLC2B | PE=1    | SV=2       |         |         |               |                      |                         |                    |    |   |
|             |          |       |                   |       |      |          |             | 36                                        | 45              | 627.23          | 1252.44   | 1252.55 | -0.11      | 0       | 48      | 0.0010075     | K.EAFNMIDQNR.D       | Oxidation (M)           | 17.1               | 25 | 2 |
|             |          |       |                   |       |      |          |             | 94                                        | 104             | 614.78          | 1227.55   | 1227.61 | -0.06      | 0       | 76      | 2.21E-06      | K.LNGTDPEDVIR.N      |                         | 20.37              |    |   |
| P16949      | 13%      | 127   | 2                 | 17292 | 5.8  | P16949   | STMN1_HUMAN | Stathmin                                  | OS=Homo sapiens | GN=STMN1        | PE=1      | SV=3    |            |         |         |               |                      |                         |                    |    |   |
|             |          |       |                   |       |      |          |             | 44                                        | 52              | 537.76          | 1073.51   | 1073.56 | -0.05      | 0       | 53      | 0.0003898     | K.DLSLEEIQK.K        |                         | 21.11              | 26 | 1 |
|             |          |       |                   |       |      |          |             | 86                                        | 95              | 583.26          | 1164.51   | 1164.54 | -0.04      | 0       | 46      | 0.0019192     | K.AIEENNNFSK.M       |                         | 14.2               |    |   |
| P23528      | 12%      | 122   | 2                 | 18719 | 8.2  | P23528   | COF1_HUMAN  | Cofilin-1                                 | OS=Homo sapiens | GN=CFL1         | PE=1      | SV=3    |            |         |         |               |                      |                         |                    |    |   |
|             |          |       |                   |       |      |          |             | 2                                         | 13              | 572.79          | 1143.56   | 1143.61 | -0.06      | 0       | 85      | 2.72E-07      | M.ASGVAVSDGVVIK.V    | Acetyl (Protein N-term) | 20.98              | 26 | 1 |
|             |          |       |                   |       |      |          |             | 14                                        | 21              | 512.76          | 1023.5    | 1023.52 | -0.02      | 1       | 37      | 0.0141741     | K.VFNDMKVR.K         | Oxidation (M)           | 13.23              |    |   |
| P62937      | 24%      | 163   | 4                 | 18229 | 7.7  | P62937   | PPIA_HUMAN  | Peptidyl-prolyl cis-trans isomerase A     | OS=Homo sapiens | GN=PPIA         | PE=1      | SV=2    |            |         |         |               |                      |                         |                    |    |   |
|             |          |       |                   |       |      |          |             | 20                                        | 28              | 528.26          | 1054.51   | 1054.53 | -0.02      | 0       | 48      | 0.0010002     | R.VSFELFADK.V        |                         | 22.7               | 27 | 1 |
|             |          |       |                   |       |      |          |             | 83                                        | 91              | 577.76          | 1153.51   | 1153.57 | -0.06      | 0       | 39      | 0.0096526     | K.FEDENFILK.H        |                         | 21.88              |    |   |
|             |          |       |                   |       |      |          |             | 134                                       | 144             | 655.78          | 1309.54   | 1309.56 | -0.03      | 0       | 36      | 0.0158677     | K.EGMNIVEAMER.F      | 2 Oxidation (M)         | 14.87              |    |   |
|             |          |       |                   |       |      |          |             | 155                                       | 165             | 624.28          | 1246.55   | 1246.62 | -0.08      | 1       | 39      | 0.0084514     | K.KITIADCGQLE.-      |                         | 20.41              |    |   |
| P62851      | 22%      | 137   | 3                 | 13791 | 10.1 | P62851   | RPS25_HUMAN | 40S ribosomal protein                     | S25             | OS=Homo sapiens | GN=RPS25  | PE=1    | SV=1       |         |         |               |                      |                         |                    |    |   |
|             |          |       |                   |       |      |          |             | 44                                        | 52              | 538.29          | 1074.57   | 1074.61 | -0.03      | 0       | 36      | 0.0207079     | K.LNNLVLFDK.A        |                         | 22.27              | 27 | 1 |
|             |          |       |                   |       |      |          |             | 67                                        | 76              | 542.79          | 1083.56   | 1083.63 | -0.07      | 0       | 50      | 0.0007122     | K.LITPAVVSER.L       |                         | 20.45              |    |   |
|             |          |       |                   |       |      |          |             | 86                                        | 94              | 486.78          | 971.54    | 971.57  | -0.03      | 0       | 51      | 0.0006744     | R.AALQELLSK.G        |                         | 21.54              |    |   |
| Q15819      | 18%      | 107   | 2                 | 16409 | 7.8  | Q15819   | UB2V2_HUMAN | Ubiquitin-conjugating enzyme E2 variant 2 | OS=Homo sapiens | GN=UBE2V2       | PE=1      | SV=4    |            |         |         |               |                      |                         |                    |    |   |
|             |          |       |                   |       |      |          |             | 2                                         | 11              | 528.29          | 1054.56   | 1054.61 | -0.05      | 1       | 45      | 0.0024104     | M.AVSTGVKVPK.N       | Acetyl (Protein N-term) | 18.9               | 27 | 1 |
|             |          |       |                   |       |      |          |             | 86                                        | 101             | 862.92          | 1723.83   | 1723.76 | 0.07       | 0       | 62      | 3.88E-05      | K.INMNGINNSSGMVDAR.S | 2 Oxidation (M)         | 14.35              |    |   |
| P30044      | 10%      | 78    | 2                 | 22298 | 8.8  | P30044   | PRDX5_HUMAN | Peroxiredoxin-5, mitochondrial            | OS=Homo sapiens | GN=PRDX5        | PE=1      | SV=3    |            |         |         |               |                      |                         |                    |    |   |
|             |          |       |                   |       |      |          |             | 149                                       | 159             | 545.25          | 1088.49   | 1088.59 | -0.09      | 0       | 39      | 0.011548      | R.LLADPTGAFGK.E      |                         | 21.19              | 27 | 1 |
|             |          |       |                   |       |      |          |             | 181                                       | 191             | 619.8           | 1237.59   | 1237.64 | -0.05      | 0       | 41      | 0.0055348     | R.FSMVVQDGIVK.A      | Oxidation (M)           | 20.28              |    |   |
| P60660      | 17%      | 135   | 2                 | 17090 | 4.6  | P60660   | MYL6_HUMAN  | Myosin light polypeptide 6                | OS=Homo sapiens | GN=MYL6         | PE=1      | SV=2    |            |         |         |               |                      |                         |                    |    |   |
|             |          |       |                   |       |      |          |             | 38                                        | 50              | 677.85          | 1353.68   | 1353.73 | -0.05      | 0       | 82      | 4.37E-07      | R.ALGQNPTNAEVLK.V    |                         | 19.57              | 28 | 2 |
|             |          |       |                   |       |      |          |             | 99                                        | 110             | 625.26          | 1248.5    | 1248.58 | -0.07      | 0       | 53      | 0.0003388     | K.EGNGTVMGAEIR.H     | Oxidation (M)           | 14.19              |    |   |
| P07737      | 18%      | 107   | 2                 | 15216 | 8.4  | P07737   | PROF1_HUMAN | Profilin-1                                | OS=Homo sapiens | GN=PFN1         | PE=1      | SV=2    |            |         |         |               |                      |                         |                    |    |   |
|             |          |       |                   |       |      |          |             | 92                                        | 105             | 690.33          | 1378.64   | 1378.71 | -0.07      | 0       | 57      | 0.0001313     | K.STGGAPTFNVTVTK.T   |                         | 20.37              | 29 | 1 |
|             |          |       |                   |       |      |          |             | 106                                       | 116             | 617.85          | 1233.68   | 1233.7  | -0.02      | 1       | 50      | 0.0008072     | K.TDKTLVLLMGK.E      | Oxidation (M)           | 20.41              |    |   |
| Q01469      | 13%      | 75    | 2                 | 15497 | 6.6  | Q01469   | FABP5_HUMAN | Fatty acid-binding protein, epidermal     | OS=Homo sapiens | GN=FABP5        | PE=1      | SV=3    |            |         |         |               |                      |                         |                    |    |   |
|             |          |       |                   |       |      |          |             | 25                                        | 33              | 464.26          | 926.51    | 926.55  | -0.05      | 0       | 32      | 0.0423292     | K.ELGVGIALR.K        |                         | 21.41              | 29 | 1 |
|             |          |       |                   |       |      |          |             | 73                                        | 81              | 513.22          | 1024.42   | 1024.45 | -0.03      | 0       | 43      | 0.0033755     | K.FEETTADGR.K        |                         | 13.45              |    |   |

**\*Footnotes to Supplemental Table 11:**

Data sets were searched with the Mascot search engine (see Perkins et al. (1999) *Electrophoresis* 20, 3551-3567). Detailed are the SwissProt accession number, the number of distinct proteolytic peptides (in some cases the number of observed redundant peptide sequences is indicated in parentheses), and the sequence coverage of the protein (%). Listed is the Mascot protein score as well as the score and expectation value for the individual peptides. Additional columns indicate the position of the protein in the 1D-SDS PAGE gel (strongest gel slice in which the protein was identified, and the total # of adjacent gel slices in which the protein was found). Proteins identified by single-peptide assignments for this experiment are not listed in this Table but in Supplemental Table 12.

**Supplemental Table 12. Proteins identified by single-peptide based assignments by HPLC-MS/MS in various BCG infected human THP-1 phagosome preparations and in latex bead human THP-1 phagosome preparations.**

See Methods (main manuscript) for criteria used for single peptide based protein assignments. As additional criteria, we required that each specific protein identification based on a single peptide assignment be observed in more than one independent biological experiment, either as part of a regular protein assignment observed together with multiple other peptides of that specific protein, or as another independent single-peptide based protein assignment.

ESI-MS/MS raw data obtained on a QSTAR Pulsar i instrument and Mascot search results for trypsin digestion of proteins separated on 1D-SDS PAGE gels and identified by single-peptide assignments. Also see Supplemental Document showing MS/MS spectra and fragment ion mass lists.

| Experiment [Suppl. Table #] | accession # | coverage | score | distinct peptides | mass  | pl   | start AA           | end AA                                                  | m/z obs | M obs | M calc | delta   | miss    | pept score | exp val | peptide  | modifications        | retent time      | Strongest gel slice | # gel slices found |    |   |
|-----------------------------|-------------|----------|-------|-------------------|-------|------|--------------------|---------------------------------------------------------|---------|-------|--------|---------|---------|------------|---------|----------|----------------------|------------------|---------------------|--------------------|----|---|
| BCG (3 hours), [ST4]        | O75390      | 2%       | 143   | 1                 | 51908 | 8.4  | O75390 CISY_HUMAN  | Citrate synthase, mitochondrial                         | 383     | 393   | 605.36 | 1208.71 | -0.01   | 0          | 60      | 6.80E-04 | K.IVPNVLLEQGK.A      |                  | 20.78               | 10                 | 1  |   |
| BCG (3 days, a), [ST6]      | O75390      | 2%       | 62    | 1                 | 51908 | 8.4  | O75390 CISY_HUMAN  | Citrate synthase, mitochondrial                         | 383     | 393   | 605.37 | 1208.72 | 0       | 0          | 41      | 5.60E-03 | K.IVPNVLLEQGK.A      |                  | 31.16               | 14                 | 1  |   |
| BCG (3 days, b), [ST7]      | O75390      | 2%       | 40    | 1                 | 51908 | 8.4  | O75390 CISY_HUMAN  | Citrate synthase, mitochondrial                         | 383     | 393   | 605.34 | 1208.67 | -0.05   | 0          | 40      | 7.30E-03 | K.IVPNVLLEQGK.A      |                  | 18.76               | 14                 | 1  |   |
| BCG (5 days), [ST8]         | O75390      | 2%       | 60    | 1                 | 51908 | 8.4  | O75390 CISY_HUMAN  | Citrate synthase, mitochondrial                         | 383     | 393   | 605.34 | 1208.66 | -0.05   | 0          | 39      | 9.00E-03 | K.IVPNVLLEQGK.A      |                  | 20.53               | 12                 | 1  |   |
| beads (3 hours), [ST9]      | O75390      | 2%       | 41    | 1                 | 51908 | 8.4  | O75390 CISY_HUMAN  | Citrate synthase, mitochondrial                         | 383     | 393   | 605.35 | 1208.69 | -0.02   | 0          | 41      | 4.70E-03 | K.IVPNVLLEQGK.A      |                  | 21.08               | 12                 | 1  |   |
| beads (3 days), [ST10]      | O75390      | 2%       | 40    | 1                 | 51908 | 8.4  | O75390 CISY_HUMAN  | Citrate synthase, mitochondrial                         | 383     | 393   | 605.4  | 1208.79 | 0.08    | 0          | 34      | 2.60E-02 | K.IVPNVLLEQGK.A      |                  | 33.06               | 14                 | 1  |   |
| Experiment [Suppl. Table #] | accession # | coverage | score | distinct peptides | mass  | pl   | start AA           | end AA                                                  | m/z obs | M obs | M calc | delta   | miss    | pept score | exp val | peptide  | modifications        | retent time      | Strongest gel slice | # gel slices found |    |   |
| BCG (3 hours), [ST4]        | Q01628      | 12%      | 111   | 1                 | 14794 | 6.5  | Q01628 IFM3_HUMAN  | Interferon-induced transmembrane protein 3              | 89      | 104   | 793.27 | 1584.54 | -0.21   | 0          | 111     | 5.00E-10 | K.MVGDVTAQAAYASTAK.C | Oxidation (M)    | 19.52               | 32                 | 2  |   |
| BCG (1 day), [ST5]          | Q01628      | 12%      | 39    | 1                 | 14794 | 6.5  | Q01628 IFM3_HUMAN  | Interferon-induced transmembrane protein 3              | 89      | 104   | 793.23 | 1584.44 | -0.3    | 0          | 39      | 5.10E-03 | K.MVGDVTAQAAYASTAK.C | Oxidation (M)    | 15.2                | 43                 | 1  |   |
| BCG (3 days, a), [ST6]      | Q01628      | 12%      | 65    | 1                 | 14794 | 6.5  | Q01628 IFM3_HUMAN  | Interferon-induced transmembrane protein 3              | 89      | 104   | 793.39 | 1584.77 | 0.03    | 0          | 65      | 2.30E-05 | K.MVGDVTAQAAYASTAK.C | Oxidation (M)    | 24.83               | 33                 | 2  |   |
| BCG (3 days, b), [ST7]      | Q01628      | 12%      | 89    | 1                 | 14794 | 6.5  | Q01628 IFM3_HUMAN  | Interferon-induced transmembrane protein 3              | 89      | 104   | 793.32 | 1584.62 | -0.13   | 0          | 89      | 8.80E-08 | K.MVGDVTAQAAYASTAK.C | Oxidation (M)    | 16.4                | 45                 | 3  |   |
| beads (3 hours), [ST9]      | Q01628      | 12%      | 116   | 1                 | 14794 | 6.5  | Q01628 IFM3_HUMAN  | Interferon-induced transmembrane protein 3              | 89      | 104   | 793.3  | 1584.58 | -0.17   | 0          | 116     | 1.50E-10 | K.MVGDVTAQAAYASTAK.C | Oxidation (M)    | 19.73               | 36                 | 3  |   |
| beads (3 days), [ST10]      | Q01628      | 12%      | 93    | 1                 | 14794 | 6.5  | Q01628 IFM3_HUMAN  | Interferon-induced transmembrane protein 3              | 89      | 104   | 793.42 | 1584.83 | 0.09    | 0          | 93      | 3.50E-08 | K.MVGDVTAQAAYASTAK.C | Oxidation (M)    | 24.57               | 36                 | 2  |   |
| other possible isoforms *   |             |          |       |                   |       |      | P13164 IFM1_HUMAN  | Interferon-induced transmembrane protein 1              |         |       |        |         |         |            |         |          |                      |                  |                     |                    |    |   |
|                             |             |          |       |                   |       |      | Q01629 IFM2_HUMAN  | Interferon-induced transmembrane protein 2              |         |       |        |         |         |            |         |          |                      |                  |                     |                    |    |   |
| Experiment [Suppl. Table #] | accession # | coverage | score | distinct peptides | mass  | pl   | start AA           | end AA                                                  | m/z obs | M obs | M calc | delta   | miss    | pept score | exp val | peptide  | modifications        | retent time      | Strongest gel slice | # gel slices found |    |   |
| BCG (1 day), [ST5]          | P30048      | 3%       | 47    | 1                 | 28017 | 7.7  | P30048 PRDX3_HUMAN | Thioredoxin-dependent peroxide reductase, mitochondrial | 208     | 214   | 417.15 | 832.29  | 832.43  | -0.14      | 0       | 47       | 1.70E-03             | R.SVEETLR.L      |                     | 13.01              | 37 | 1 |
| BCG (3 days, a), [ST6]      | P30048      | 4%       | 57    | 1                 | 28017 | 7.7  | P30048 PRDX3_HUMAN | Thioredoxin-dependent peroxide reductase, mitochondrial | 74      | 83    | 511.29 | 1020.52 | 0.05    | 0          | 32      | 4.90E-02 | K.GTAVVNGEFDK        |                  | 23.92               | 27                 | 2  |   |
| BCG (3 days, b), [ST7]      | P30048      | 4%       | 82    | 1                 | 28017 | 7.7  | P30048 PRDX3_HUMAN | Thioredoxin-dependent peroxide reductase, mitochondrial | 74      | 83    | 511.23 | 1020.45 | 1020.52 | -0.07      | 0       | 40       | 7.30E-03             | K.GTAVVNGEFDK    |                     | 14.7               | 27 | 1 |
| BCG (5 days), [ST8]         | P30048      | 3%       | 64    | 1                 | 28017 | 7.7  | P30048 PRDX3_HUMAN | Thioredoxin-dependent peroxide reductase, mitochondrial | 208     | 214   | 417.21 | 832.41  | 832.43  | -0.01      | 0       | 42       | 5.50E-03             | R.SVEETLR.L      |                     | 13.94              | 21 | 2 |
| beads (3 hours), [ST9]      | P30048      | 3%       | 66    | 1                 | 28017 | 7.7  | P30048 PRDX3_HUMAN | Thioredoxin-dependent peroxide reductase, mitochondrial | 208     | 214   | 417.2  | 832.38  | 832.43  | -0.05      | 0       | 37       | 1.80E-02             | R.SVEETLR.L      |                     | 14.87              | 27 | 1 |
| beads (3 days), [ST10]      | P30048      | 4%       | 49    | 1                 | 28017 | 7.7  | P30048 PRDX3_HUMAN | Thioredoxin-dependent peroxide reductase, mitochondrial | 74      | 83    | 511.29 | 1020.58 | 1020.52 | 0.05       | 0       | 39       | 9.00E-03             | K.GTAVVNGEFDK    |                     | 24.06              | 26 | 2 |
| Experiment [Suppl. Table #] | accession # | coverage | score | distinct peptides | mass  | pl   | start AA           | end AA                                                  | m/z obs | M obs | M calc | delta   | miss    | pept score | exp val | peptide  | modifications        | retent time      | Strongest gel slice | # gel slices found |    |   |
| BCG (1 day), [ST5]          | P14314      | 2%       | 53    | 1                 | 60357 | 4.3  | P14314 GLU2B_HUMAN | Glucosidase 2 subunit beta                              | 125     | 135   | 654.23 | 1306.44 | 1306.62 | -0.18      | 0       | 53       | 3.40E-04             | R.ESLQMAEVTR.E   | Oxidation (M)       | 14.16              | 19 | 1 |
| BCG (3 days, a), [ST6]      | P14314      | 2%       | 42    | 1                 | 60357 | 4.3  | P14314 GLU2B_HUMAN | Glucosidase 2 subunit beta                              | 125     | 135   | 654.39 | 1306.77 | 1306.62 | 0.15       | 0       | 42       | 4.80E-03             | R.ESLQMAEVTR.E   | Oxidation (M)       | 22.96              | 6  | 1 |
| BCG (3 days, b), [ST7]      | P14314      | 2%       | 86    | 1                 | 60357 | 4.3  | P14314 GLU2B_HUMAN | Glucosidase 2 subunit beta                              | 125     | 135   | 654.29 | 1306.57 | 1306.62 | -0.05      | 0       | 60       | 7.30E-05             | R.ESLQMAEVTR.E   | Oxidation (M)       | 14.65              | 7  | 1 |
| BCG (5 days), [ST8]         | P14314      | 2%       | 129   | 1                 | 60357 | 4.3  | P14314 GLU2B_HUMAN | Glucosidase 2 subunit beta                              | 125     | 135   | 654.3  | 1306.58 | 1306.62 | -0.04      | 0       | 58       | 1.00E-04             | R.ESLQMAEVTR.E   | Oxidation (M)       | 15.3               | 6  | 1 |
| beads (5 days), [ST11]      | P14314      | 2%       | 92    | 1                 | 60357 | 4.3  | P14314 GLU2B_HUMAN | Glucosidase 2 subunit beta                              | 125     | 135   | 654.29 | 1306.56 | 1306.62 | -0.06      | 0       | 72       | 4.50E-06             | R.ESLQMAEVTR.E   | Oxidation (M)       | 15.43              | 5  | 1 |
| Experiment [Suppl. Table #] | accession # | coverage | score | distinct peptides | mass  | pl   | start AA           | end AA                                                  | m/z obs | M obs | M calc | delta   | miss    | pept score | exp val | peptide  | modifications        | retent time      | Strongest gel slice | # gel slices found |    |   |
| BCG (1 day), [ST5]          | Q00325      | 3%       | 86    | 1                 | 40525 | 9.4  | Q00325 MPCC_HUMAN  | Phosphate carrier protein, mitochondrial                | 190     | 201   | 681.26 | 1360.5  | 1360.71 | -0.21      | 0       | 48       | 1.10E-03             | R.IQTQPGYANTLR.D |                     | 15.11              | 1  | 2 |
| BCG (3 days, a), [ST6]      | Q00325      | 3%       | 52    | 1                 | 40525 | 9.4  | Q00325 MPCC_HUMAN  | Phosphate carrier protein, mitochondrial                | 190     | 201   | 681.41 | 1360.81 | 1360.71 | 0.1        | 0       | 43       | 3.40E-03             | R.IQTQPGYANTLR.D |                     | 25.78              | 1  | 1 |
| BCG (3 days, b), [ST7]      | Q00325      | 3%       | 51    | 1                 | 40525 | 9.4  | Q00325 MPCC_HUMAN  | Phosphate carrier protein, mitochondrial                | 190     | 201   | 681.33 | 1360.65 | 1360.71 | -0.06      | 0       | 42       | 4.30E-03             | R.IQTQPGYANTLR.D |                     | 16.78              | 1  | 2 |
| BCG (5 days), [ST8]         | Q00325      | 3%       | 45    | 1                 | 40525 | 9.4  | Q00325 MPCC_HUMAN  | Phosphate carrier protein, mitochondrial                | 190     | 201   | 681.35 | 1360.68 | 1360.71 | -0.03      | 0       | 45       | 2.60E-03             | R.IQTQPGYANTLR.D |                     | 17.23              | 2  | 1 |
| beads (3 days), [ST10]      | Q00325      | 3%       | 64    | 1                 | 40525 | 9.4  | Q00325 MPCC_HUMAN  | Phosphate carrier protein, mitochondrial                | 190     | 201   | 681.45 | 1360.88 | 1360.71 | 0.17       | 0       | 52       | 5.20E-04             | R.IQTQPGYANTLR.D |                     | 26.73              | 1  | 1 |
| Experiment [Suppl. Table #] | accession # | coverage | score | distinct peptides | mass  | pl   | start AA           | end AA                                                  | m/z obs | M obs | M calc | delta   | miss    | pept score | exp val | peptide  | modifications        | retent time      | Strongest gel slice | # gel slices found |    |   |
| BCG (3 days, a), [ST6]      | P26373      | 5%       | 46    | 1                 | 24304 | 11.7 | P26373 RL13_HUMAN  | 60S ribosomal protein L13                               | 106     | 116   | 616.83 | 1231.65 | 1231.62 | 0.03       | 0       | 46       | 1.90E-03             | K.STESLQANVQR.L  |                     | 19.93              | 23 | 2 |
| BCG (3 days, b), [ST7]      | P26373      | 5%       | 42    | 1                 | 24304 | 11.7 | P26373 RL13_HUMAN  | 60S ribosomal protein L13                               | 106     | 116   | 616.8  | 1231.59 | 1231.62 | -0.03      | 0       | 43       | 4.30E-03             | K.STESLQANVQR.L  |                     | 13.55              | 23 | 2 |
| Experiment [Suppl. Table #] | accession # | coverage | score | distinct peptides | mass  | pl   | start AA           | end AA                                                  | m/z obs | M obs | M calc | delta   | miss    | pept score | exp val | peptide  | modifications        | retent time      | Strongest gel slice | # gel slices found |    |   |
| BCG (3 hours), [ST4]        | P11234      | 5%       | 63    | 1                 | 23508 | 6.2  | P11234 RALB_HUMAN  | Ras-related protein Rai-B                               | 17      | 27    | 510.27 | 1018.53 | 1018.55 | -0.02      | 0       | 35       | 3.10E-02             | K.VIMVGGSGVGK.S  | Oxidation (M)       | 15.02              | 20 | 1 |
| BCG (3 days, b), [ST7]      | P11234      | 5%       | 75    | 1                 | 23508 | 6.2  | P11234 RALB_HUMAN  | Ras-related protein Rai-B                               | 17      | 27    | 510.25 | 1018.49 | 1018.55 | -0.06      | 0       | 42       | 5.60E-03             | K.VIMVGGSGVGK.S  | Oxidation (M)       | 14.48              | 26 | 1 |
| BCG (5 days), [ST8]         | P11234      | 5%       | 38    | 1                 | 23508 | 6.2  | P11234 RALB_HUMAN  | Ras-related protein Rai-B                               |         |       |        |         |         |            |         |          |                      |                  |                     |                    |    |   |

| other possible isoform      | P11233      | RALA_HUMAN  | Ras-related protein Ral-A precursor     | 17                | 27    | 510.28 | 1018.54            | 1018.55                                    | -0.01           | 0          | 38     | 1.40E-02 | K.VIMVGGSGVGK.S | Oxidation (M)      | 14.54   |         |               |             |                     |                    |
|-----------------------------|-------------|-------------|-----------------------------------------|-------------------|-------|--------|--------------------|--------------------------------------------|-----------------|------------|--------|----------|-----------------|--------------------|---------|---------|---------------|-------------|---------------------|--------------------|
| Experiment [Suppl. Table #] | accession # | coverage    | score                                   | distinct peptides | mass  | pl     | start AA           | end AA                                     | m/z obs         | M obs      | M calc | delta    | miss            | pept score         | exp val | peptide | modifications | retent time | Strongest gel slice | # gel slices found |
| BCG (3 hours), [ST4]        | P61224      | 6%          | 57                                      | 1                 | 21040 | 5.7    | P61224 RAP1B_HUMAN | Ras-related protein Rap-1b                 | OS=Homo sapiens | GN=RAP1B   | PE=1   | SV=1     | 1.40E-04        | K.LVVLGGSGVGK.S    |         | 20.93   | 23            | 2           |                     |                    |
| BCG (3 days, a), [ST6]      | P61224      | 6%          | 79                                      | 1                 | 21040 | 5.7    | P61224 RAP1B_HUMAN | Ras-related protein Rap-1b                 | OS=Homo sapiens | GN=RAP1B   | PE=1   | SV=1     | 9.10E-03        | K.LVVLGGSGVGK.S    |         | 25.91   | 29            | 2           |                     |                    |
| BCG (3 days, b), [ST7]      | P61224      | 6%          | 63                                      | 1                 | 21040 | 5.7    | P61224 RAP1B_HUMAN | Ras-related protein Rap-1b                 | OS=Homo sapiens | GN=RAP1B   | PE=1   | SV=1     | 5.70E-05        | K.LVVLGGSGVGK.S    |         | 19.29   | 30            | 2           |                     |                    |
| beads (3 hours), [ST9]      | P61224      | 6%          | 60                                      | 1                 | 21040 | 5.7    | P61224 RAP1B_HUMAN | Ras-related protein Rap-1b                 | OS=Homo sapiens | GN=RAP1B   | PE=1   | SV=1     | 7.80E-06        | K.LVVLGGSGVGK.S    |         | 20.65   | 26            | 2           |                     |                    |
| beads (3 days), [ST10]      | P61224      | 6%          | 101                                     | 1                 | 21040 | 5.7    | P61224 RAP1B_HUMAN | Ras-related protein Rap-1b                 | OS=Homo sapiens | GN=RAP1B   | PE=1   | SV=1     | 2.00E-05        | K.LVVLGGSGVGK.S    |         | 24.43   | 29            | 3           |                     |                    |
| beads (5 days), [ST11]      | P61224      | 6%          | 55                                      | 1                 | 21040 | 5.7    | P61224 RAP1B_HUMAN | Ras-related protein Rap-1b                 | OS=Homo sapiens | GN=RAP1B   | PE=1   | SV=1     | 2.40E-04        | K.LVVLGGSGVGK.S    |         | 20.19   | 24            | 1           |                     |                    |
| other possible isoform      | P62834      | RAP1A_HUMAN | Ras-related protein Rap-1A precursor    |                   |       |        |                    |                                            |                 |            |        |          |                 |                    |         |         |               |             |                     |                    |
| Experiment [Suppl. Table #] | accession # | coverage    | score                                   | distinct peptides | mass  | pl     | start AA           | end AA                                     | m/z obs         | M obs      | M calc | delta    | miss            | pept score         | exp val | peptide | modifications | retent time | Strongest gel slice | # gel slices found |
| BCG (3 days, a), [ST6]      | Q3B8N2      | 2%          | 49                                      | 1                 | 39977 | 9.6    | Q3B8N2 LEG9B_HUMAN | Galectin-9B                                | OS=Homo sapiens | GN=LGALS9B | PE=2   | SV=3     | 1.10E-03        | R.FDENAVVR.N       |         | 24.12   | 20            | 3           |                     |                    |
| BCG (3 days, b), [ST7]      | Q3B8N2      | 2%          | 45                                      | 1                 | 39977 | 9.6    | Q3B8N2 LEG9B_HUMAN | Galectin-9B                                | OS=Homo sapiens | GN=LGALS9B | PE=2   | SV=3     | 2.70E-03        | R.FDENAVVR.N       |         | 15.37   | 17            | 3           |                     |                    |
| BCG (5 days), [ST8]         | Q3B8N2      | 2%          | 42                                      | 1                 | 39977 | 9.6    | Q3B8N2 LEG9B_HUMAN | Galectin-9B                                | OS=Homo sapiens | GN=LGALS9B | PE=2   | SV=3     | 5.20E-03        | R.FDENAVVR.N       |         | 15.76   | 15            | 1           |                     |                    |
| beads (3 days), [ST10]      | Q3B8N2      | 2%          | 45                                      | 1                 | 39977 | 9.6    | Q3B8N2 LEG9B_HUMAN | Galectin-9B                                | OS=Homo sapiens | GN=LGALS9B | PE=2   | SV=3     | 2.60E-03        | R.FDENAVVR.N       |         | 23.26   | 32            | 1           |                     |                    |
| other possible isoform      | Q6DKI2      | LEG9C_HUMAN | Galectin-9C (Galectin-9-like protein B) |                   |       |        |                    |                                            |                 |            |        |          |                 |                    |         |         |               |             |                     |                    |
| Experiment [Suppl. Table #] | accession # | coverage    | score                                   | distinct peptides | mass  | pl     | start AA           | end AA                                     | m/z obs         | M obs      | M calc | delta    | miss            | pept score         | exp val | peptide | modifications | retent time | Strongest gel slice | # gel slices found |
| BCG (3 hours), [ST4]        | Q15907      | 5%          | 76                                      | 1                 | 24588 | 5.6    | Q15907 RB11B_HUMAN | Ras-related protein Rab-11B                | OS=Homo sapiens | GN=RAB11B  | PE=1   | SV=4     | 1.50E-04        | K.VVVLGDSGVGK.S    |         | 19.9    | 20            | 1           |                     |                    |
| BCG (3 days, b), [ST7]      | Q15907      | 5%          | 40                                      | 1                 | 24588 | 5.6    | Q15907 RB11B_HUMAN | Ras-related protein Rab-11B                | OS=Homo sapiens | GN=RAB11B  | PE=1   | SV=4     | 7.50E-03        | K.VVVLGDSGVGK.S    |         | 19.45   | 27            | 1           |                     |                    |
| BCG (5 days), [ST8]         | Q15907      | 5%          | 121                                     | 1                 | 24588 | 5.6    | Q15907 RB11B_HUMAN | Ras-related protein Rab-11B                | OS=Homo sapiens | GN=RAB11B  | PE=1   | SV=4     | 3.20E-04        | K.VVVLGDSGVGK.S    |         | 19.93   | 21            | 1           |                     |                    |
| beads (3 hours), [ST9]      | Q15907      | 5%          | 44                                      | 1                 | 24588 | 5.6    | Q15907 RB11B_HUMAN | Ras-related protein Rab-11B                | OS=Homo sapiens | GN=RAB11B  | PE=1   | SV=4     | 3.60E-03        | K.VVVLGDSGVGK.S    |         | 20.94   | 23            | 1           |                     |                    |
| beads (3 days), [ST10]      | Q15907      | 5%          | 50                                      | 1                 | 24588 | 5.6    | Q15907 RB11B_HUMAN | Ras-related protein Rab-11B                | OS=Homo sapiens | GN=RAB11B  | PE=1   | SV=4     | 1.60E-02        | K.VVVLGDSGVGK.S    |         | 26      | 25            | 1           |                     |                    |
| other possible isoform      | P62491      | RB11A_HUMAN | Ras-related protein Rab-11A (Rab-11)    |                   |       |        |                    |                                            |                 |            |        |          |                 |                    |         |         |               |             |                     |                    |
| Experiment [Suppl. Table #] | accession # | coverage    | score                                   | distinct peptides | mass  | pl     | start AA           | end AA                                     | m/z obs         | M obs      | M calc | delta    | miss            | pept score         | exp val | peptide | modifications | retent time | Strongest gel slice | # gel slices found |
| BCG (1 day), [ST5]          | Q9NVJ2      | 5%          | 120                                     | 1                 | 21753 | 8.7    | Q9NVJ2 ARL8B_HUMAN | ADP-ribosylation factor-like protein 8B    | OS=Homo sapiens | GN=ARL8B   | PE=1   | SV=1     | 2.70E-07        | K.MMLSAIQDR.E      |         | 13.4    | 39            | 1           |                     |                    |
| BCG (3 days, a), [ST6]      | Q9NVJ2      | 5%          | 77                                      | 1                 | 21753 | 8.7    | Q9NVJ2 ARL8B_HUMAN | ADP-ribosylation factor-like protein 8B    | OS=Homo sapiens | GN=ARL8B   | PE=1   | SV=1     | 1.40E-06        | K.MMLSAIQDR.E      |         | 22.5    | 30            | 3           |                     |                    |
| BCG (3 days, b), [ST7]      | Q9NVJ2      | 5%          | 98                                      | 1                 | 21753 | 8.7    | Q9NVJ2 ARL8B_HUMAN | ADP-ribosylation factor-like protein 8B    | OS=Homo sapiens | GN=ARL8B   | PE=1   | SV=1     | 1.30E-06        | K.MMLSAIQDR.E      |         | 14.37   | 31            | 2           |                     |                    |
| beads (3 days), [ST10]      | Q9NVJ2      | 5%          | 55                                      | 1                 | 21753 | 8.7    | Q9NVJ2 ARL8B_HUMAN | ADP-ribosylation factor-like protein 8B    | OS=Homo sapiens | GN=ARL8B   | PE=1   | SV=1     | 2.00E-02        | R.DLPNALDEK.Q      |         | 24.47   | 29            | 2           |                     |                    |
| other possible isoform      | Q96BM9      | ARL8A_HUMAN | ADP-ribosylation factor-like protein 8A |                   |       |        |                    |                                            |                 |            |        |          |                 |                    |         |         |               |             |                     |                    |
| Experiment [Suppl. Table #] | accession # | coverage    | score                                   | distinct peptides | mass  | pl     | start AA           | end AA                                     | m/z obs         | M obs      | M calc | delta    | miss            | pept score         | exp val | peptide | modifications | retent time | Strongest gel slice | # gel slices found |
| BCG (3 hours), [ST4]        | O75964      | 11%         | 88                                      | 1                 | 11421 | 9.7    | O75964 ATP5L_HUMAN | ATP synthase subunit g, mitochondrial      | OS=Homo sapiens | GN=ATP5L   | PE=1   | SV=3     | 1.10E-07        | K.IVNSAQTGSFK.Q    |         | 14.8    | 33            | 1           |                     |                    |
| BCG (3 days, a), [ST6]      | O75964      | 11%         | 49                                      | 1                 | 11421 | 9.7    | O75964 ATP5L_HUMAN | ATP synthase subunit g, mitochondrial      | OS=Homo sapiens | GN=ATP5L   | PE=1   | SV=3     | 9.90E-04        | K.IVNSAQTGSFK.Q    |         | 19.9    | 36            | 1           |                     |                    |
| BCG (3 days, b), [ST7]      | O75964      | 11%         | 64                                      | 1                 | 11421 | 9.7    | O75964 ATP5L_HUMAN | ATP synthase subunit g, mitochondrial      | OS=Homo sapiens | GN=ATP5L   | PE=1   | SV=3     | 2.60E-05        | K.IVNSAQTGSFK.Q    |         | 13.24   | 46            | 2           |                     |                    |
| beads (3 hours), [ST9]      | O75964      | 11%         | 70                                      | 1                 | 11421 | 9.7    | O75964 ATP5L_HUMAN | ATP synthase subunit g, mitochondrial      | OS=Homo sapiens | GN=ATP5L   | PE=1   | SV=3     | 1.00E-04        | K.IVNSAQTGSFK.Q    |         | 14.93   | 35            | 1           |                     |                    |
| Experiment [Suppl. Table #] | accession # | coverage    | score                                   | distinct peptides | mass  | pl     | start AA           | end AA                                     | m/z obs         | M obs      | M calc | delta    | miss            | pept score         | exp val | peptide | modifications | retent time | Strongest gel slice | # gel slices found |
| BCG (3 days, a), [ST6]      | P04040      | 2%          | 67                                      | 1                 | 59947 | 6.9    | P04040 CATA_HUMAN  | Catalase                                   | OS=Homo sapiens | GN=CAT     | PE=1   | SV=3     | 1.90E-03        | R.FNTANDNDVTVQR.A  |         | 24.21   | 10            | 1           |                     |                    |
| BCG (3 days, b), [ST7]      | P04040      | 2%          | 61                                      | 1                 | 59947 | 6.9    | P04040 CATA_HUMAN  | Catalase                                   | OS=Homo sapiens | GN=CAT     | PE=1   | SV=3     | 6.40E-05        | R.FNTANDNDVTVQR.A  |         | 15.38   | 11            | 1           |                     |                    |
| BCG (5 days), [ST8]         | P04040      | 2%          | 120                                     | 1                 | 59947 | 6.9    | P04040 CATA_HUMAN  | Catalase                                   | OS=Homo sapiens | GN=CAT     | PE=1   | SV=3     | 3.70E-08        | R.FNTANDNDVTVQR.A  |         | 15.48   | 9             | 1           |                     |                    |
| beads (5 days), [ST11]      | P04040      | 2%          | 57                                      | 1                 | 59947 | 6.9    | P04040 CATA_HUMAN  | Catalase                                   | OS=Homo sapiens | GN=CAT     | PE=1   | SV=3     | 1.30E-04        | R.FNTANDNDVTVQR.A  |         | 15.94   | 8             | 1           |                     |                    |
| Experiment [Suppl. Table #] | accession # | coverage    | score                                   | distinct peptides | mass  | pl     | start AA           | end AA                                     | m/z obs         | M obs      | M calc | delta    | miss            | pept score         | exp val | peptide | modifications | retent time | Strongest gel slice | # gel slices found |
| BCG (3 days, a), [ST6]      | P47756      | 5%          | 124                                     | 1                 | 31616 | 5.4    | P47756 CAPZB_HUMAN | F-actin-capping protein subunit beta       | OS=Homo sapiens | GN=CAPZB   | PE=1   | SV=4     | 6.60E-08        | K.SGSGTMNLGGLSTR.Q |         | 22.87   | 21            | 1           |                     |                    |
| BCG (3 days, b), [ST7]      | P47756      | 5%          | 84                                      | 1                 | 31616 | 5.4    | P47756 CAPZB_HUMAN | F-actin-capping protein subunit beta       | OS=Homo sapiens | GN=CAPZB   | PE=1   | SV=4     | 9.90E-07        | K.SGSGTMNLGGLSTR.Q |         | 14.42   | 21            | 2           |                     |                    |
| BCG (5 days), [ST8]         | P47756      | 5%          | 77                                      | 1                 | 31616 | 5.4    | P47756 CAPZB_HUMAN | F-actin-capping protein subunit beta       | OS=Homo sapiens | GN=CAPZB   | PE=1   | SV=4     | 1.20E-06        | K.SGSGTMNLGGLSTR.Q |         | 14.82   | 17            | 1           |                     |                    |
| beads (3 days), [ST10]      | P47756      | 5%          | 41                                      | 1                 | 31616 | 5.4    | P47756 CAPZB_HUMAN | F-actin-capping protein subunit beta       | OS=Homo sapiens | GN=CAPZB   | PE=1   | SV=4     | 5.60E-03        | K.SGSGTMNLGGLSTR.Q |         | 28.23   | 21            | 1           |                     |                    |
| Experiment [Suppl. Table #] | accession # | coverage    | score                                   | distinct peptides | mass  | pl     | start AA           | end AA                                     | m/z obs         | M obs      | M calc | delta    | miss            | pept score         | exp val | peptide | modifications | retent time | Strongest gel slice | # gel slices found |
| BCG (3 hours), [ST4]        | Q9HB40      | 2%          | 67                                      | 1                 | 51083 | 5.6    | Q9HB40 RISC_HUMAN  | Retinoid-inducible serine carboxypeptidase | OS=Homo sapiens | GN=SCPEP1  | PE=1   | SV=1     | 1.50E-05        | K.VAEQVLNAVKN.G    |         | 19.39   | 19            | 4           |                     |                    |
| BCG (3 days, b), [ST7]      | Q9HB40      | 2%          | 83                                      | 1                 | 51083 | 5.6    | Q9HB40 RISC_HUMAN  | Retinoid-inducible serine carboxypeptidase | OS=Homo sapiens | GN=SCPEP1  | PE=1   | SV=1     | 3.40E-07        | K.VAEQVLNAVKN.G    |         | 18.64   | 25            | 5           |                     |                    |
| BCG (5 days), [ST8]         | Q9HB40      | 2%          | 68                                      | 1                 | 51083 | 5.6    | Q9HB40 RISC_HUMAN  | Retinoid-inducible serine carboxypeptidase | OS=Homo sapiens | GN=SCPEP1  | PE=1   | SV=1     | 1.20E-05        | K.VAEQVLNAVKN.G    |         | 19.07   | 20            | 2           |                     |                    |

| Experiment [Suppl. Table #] | accession # | coverage | score | distinct peptides | mass  | pl  | start AA           | end AA                                              | m/z obs                             | M obs                                | M calc | delta | miss | pept score | exp val | peptide                         | modifications   | retent time | Strongest gel slice | # gel slices found |
|-----------------------------|-------------|----------|-------|-------------------|-------|-----|--------------------|-----------------------------------------------------|-------------------------------------|--------------------------------------|--------|-------|------|------------|---------|---------------------------------|-----------------|-------------|---------------------|--------------------|
| Experiment [Suppl. Table #] | accession # | coverage | score | distinct peptides | mass  | pl  | start AA           | end AA                                              | m/z obs                             | M obs                                | M calc | delta | miss | pept score | exp val | peptide                         | modifications   | retent time | Strongest gel slice | # gel slices found |
| BCG (3 hours), [ST4]        | P27449      | 12%      | 37    | 1                 | 15725 | 8   | P27449 VATL_HUMAN  | Vacuolar ATP synthase                               | 16 kDa proteolipid subunit          | OS=Homo sapiens GN=ATP6VOC PE=1 SV=1 |        |       |      |            |         | 1.10E-02 K.SGTGIAAMSVMRPEQIMK.S | 3 Oxidation (M) | 16          | 2                   | 1                  |
| BCG (1 day), [ST5]          | P27449      | 12%      | 38    | 1                 | 15725 | 8   | P27449 VATL_HUMAN  | Vacuolar ATP synthase                               | 16 kDa proteolipid subunit          | OS=Homo sapiens GN=ATP6VOC PE=1 SV=1 |        |       |      |            |         | 8.00E-03 K.SGTGIAAMSVMRPEQIMK.S | 3 Oxidation (M) | 13.74       | 1                   | 1                  |
| BCG (5 days), [ST8]         | P27449      | 12%      | 46    | 1                 | 15725 | 8   | P27449 VATL_HUMAN  | Vacuolar ATP synthase                               | 16 kDa proteolipid subunit          | OS=Homo sapiens GN=ATP6VOC PE=1 SV=1 |        |       |      |            |         | 1.40E-03 K.SGTGIAAMSVMRPEQIMK.S | 3 Oxidation (M) | 15.39       | 2                   | 1                  |
| beads (3 hours), [ST9]      | P27449      | 12%      | 43    | 1                 | 15725 | 8   | P27449 VATL_HUMAN  | Vacuolar ATP synthase                               | 16 kDa proteolipid subunit          | OS=Homo sapiens GN=ATP6VOC PE=1 SV=1 |        |       |      |            |         | 3.00E-03 K.SGTGIAAMSVMRPEQIMK.S | 3 Oxidation (M) | 15.19       | 2                   | 1                  |
| Experiment [Suppl. Table #] | accession # | coverage | score | distinct peptides | mass  | pl  | start AA           | end AA                                              | m/z obs                             | M obs                                | M calc | delta | miss | pept score | exp val | peptide                         | modifications   | retent time | Strongest gel slice | # gel slices found |
| BCG (1 day), [ST5]          | P42766      | 8%       | 52    | 1                 | 14543 | 11  | P42766 RL35_HUMAN  | 60S ribosomal protein L35                           | OS=Homo sapiens GN=RPL35 PE=1 SV=2  |                                      |        |       |      |            |         | 5.50E-04 R.VLTVINQTKQ.E         |                 | 14.63       | 41                  | 1                  |
| BCG (3 days), [ST7]         | P42766      | 8%       | 47    | 1                 | 14543 | 11  | P42766 RL35_HUMAN  | 60S ribosomal protein L35                           | OS=Homo sapiens GN=RPL35 PE=1 SV=2  |                                      |        |       |      |            |         | 1.50E-03 R.VLTVINQTKQ.E         |                 | 15.96       | 35                  | 1                  |
| BCG (5 days), [ST8]         | P42766      | 8%       | 42    | 1                 | 14543 | 11  | P42766 RL35_HUMAN  | 60S ribosomal protein L35                           | OS=Homo sapiens GN=RPL35 PE=1 SV=2  |                                      |        |       |      |            |         | 4.70E-03 R.VLTVINQTKQ.E         |                 | 16.85       | 26                  | 1                  |
| Experiment [Suppl. Table #] | accession # | coverage | score | distinct peptides | mass  | pl  | start AA           | end AA                                              | m/z obs                             | M obs                                | M calc | delta | miss | pept score | exp val | peptide                         | modifications   | retent time | Strongest gel slice | # gel slices found |
| BCG (3 days), [ST6]         | P62917      | 4%       | 42    | 1                 | 28235 | 11  | P62917 RL8_HUMAN   | 60S ribosomal protein L8                            | OS=Homo sapiens GN=RPL8 PE=1 SV=2   |                                      |        |       |      |            |         | 3.30E-03 R.AVVGVVAGGGR.I        |                 | 22.05       | 23                  | 1                  |
| BCG (3 days), [ST7]         | P62917      | 4%       | 61    | 1                 | 28235 | 11  | P62917 RL8_HUMAN   | 60S ribosomal protein L8                            | OS=Homo sapiens GN=RPL8 PE=1 SV=2   |                                      |        |       |      |            |         | 7.60E-03 R.AVVGVVAGGGR.I        |                 | 13.9        | 21                  | 1                  |
| BCG (5 days), [ST8]         | P62917      | 4%       | 38    | 1                 | 28235 | 11  | P62917 RL8_HUMAN   | 60S ribosomal protein L8                            | OS=Homo sapiens GN=RPL8 PE=1 SV=2   |                                      |        |       |      |            |         | 1.20E-02 R.AVVGVVAGGGR.I        |                 | 14.43       | 18                  | 1                  |
| Experiment [Suppl. Table #] | accession # | coverage | score | distinct peptides | mass  | pl  | start AA           | end AA                                              | m/z obs                             | M obs                                | M calc | delta | miss | pept score | exp val | peptide                         | modifications   | retent time | Strongest gel slice | # gel slices found |
| BCG (1 day), [ST5]          | P24539      | 3%       | 50    | 1                 | 28947 | 9.4 | P24539 AT5F1_HUMAN | ATP synthase subunit b, mitochondrial               | OS=Homo sapiens GN=ATP5F1 PE=1 SV=2 |                                      |        |       |      |            |         | 6.30E-04 K.LLAQLEAK.Q           |                 | 13.14       | 37                  | 1                  |
| BCG (3 days), [ST6]         | P24539      | 3%       | 92    | 1                 | 28947 | 9.4 | P24539 AT5F1_HUMAN | ATP synthase subunit b, mitochondrial               | OS=Homo sapiens GN=ATP5F1 PE=1 SV=2 |                                      |        |       |      |            |         | 1.40E-02 K.LLAQLEAK.Q           |                 | 20.07       | 25                  | 2                  |
| Experiment [Suppl. Table #] | accession # | coverage | score | distinct peptides | mass  | pl  | start AA           | end AA                                              | m/z obs                             | M obs                                | M calc | delta | miss | pept score | exp val | peptide                         | modifications   | retent time | Strongest gel slice | # gel slices found |
| BCG (1 day), [ST5]          | P16070      | 2%       | 123   | 1                 | 82017 | 5.1 | P16070 CD44_HUMAN  | CD44 antigen                                        | OS=Homo sapiens GN=CD44 PE=1 SV=2   |                                      |        |       |      |            |         | 2.10E-07 K.LVINGSGNGAVEDR.K     |                 | 14.93       | 21                  | 1                  |
| BCG (3 days), [ST6]         | P16070      | 2%       | 132   | 1                 | 82017 | 5.1 | P16070 CD44_HUMAN  | CD44 antigen                                        | OS=Homo sapiens GN=CD44 PE=1 SV=2   |                                      |        |       |      |            |         | 2.30E-08 K.LVINGSGNGAVEDR.K     |                 | 25.29       | 7                   | 5                  |
| BCG (3 days), [ST7]         | P16070      | 2%       | 70    | 1                 | 82017 | 5.1 | P16070 CD44_HUMAN  | CD44 antigen                                        | OS=Homo sapiens GN=CD44 PE=1 SV=2   |                                      |        |       |      |            |         | 8.00E-06 K.LVINGSGNGAVEDR.K     |                 | 16.33       | 7                   | 2                  |
| Experiment [Suppl. Table #] | accession # | coverage | score | distinct peptides | mass  | pl  | start AA           | end AA                                              | m/z obs                             | M obs                                | M calc | delta | miss | pept score | exp val | peptide                         | modifications   | retent time | Strongest gel slice | # gel slices found |
| BCG (1 day), [ST5]          | P00918      | 4%       | 91    | 1                 | 29285 | 6.9 | P00918 CAH2_HUMAN  | Carbonic anhydrase 2                                | OS=Homo sapiens GN=CA2 PE=1 SV=2    |                                      |        |       |      |            |         | 5.30E-03 K.SADFTNFDP.R          |                 | 19.39       | 35                  | 1                  |
| BCG (3 days), [ST7]         | P00918      | 3%       | 129   | 1                 | 29285 | 6.9 | P00918 CAH2_HUMAN  | Carbonic anhydrase 2                                | OS=Homo sapiens GN=CA2 PE=1 SV=2    |                                      |        |       |      |            |         | 1.60E-04 K.VVDVLDISK.T          |                 | 20.5        | 22                  | 4                  |
| BCG (5 days), [ST8]         | P00918      | 3%       | 63    | 1                 | 29285 | 6.9 | P00918 CAH2_HUMAN  | Carbonic anhydrase 2                                | OS=Homo sapiens GN=CA2 PE=1 SV=2    |                                      |        |       |      |            |         | 1.70E-03 K.VVDVLDISK.T          |                 | 20.73       | 19                  | 1                  |
| Experiment [Suppl. Table #] | accession # | coverage | score | distinct peptides | mass  | pl  | start AA           | end AA                                              | m/z obs                             | M obs                                | M calc | delta | miss | pept score | exp val | peptide                         | modifications   | retent time | Strongest gel slice | # gel slices found |
| BCG (1 day), [ST5]          | O75955      | 2%       | 83    | 1                 | 47554 | 7.1 | O75955 FLOT1_HUMAN | Fliotillin-1                                        | OS=Homo sapiens GN=FLOT1 PE=1 SV=3  |                                      |        |       |      |            |         | 2.50E-03 R.VQVQVVER.A           |                 | 13.44       | 29                  | 1                  |
| BCG (3 days), [ST7]         | O75955      | 3%       | 45    | 1                 | 47554 | 7.1 | O75955 FLOT1_HUMAN | Fliotillin-1                                        | OS=Homo sapiens GN=FLOT1 PE=1 SV=3  |                                      |        |       |      |            |         | 2.90E-03 R.ISLNTLTLNVK.S        |                 | 20.39       | 14                  | 1                  |
| BCG (5 days), [ST8]         | O75955      | 3%       | 65    | 1                 | 47554 | 7.1 | O75955 FLOT1_HUMAN | Fliotillin-1                                        | OS=Homo sapiens GN=FLOT1 PE=1 SV=3  |                                      |        |       |      |            |         | 2.90E-05 K.VTGEVLDILTR.L        |                 | 21.82       | 11                  | 1                  |
| Experiment [Suppl. Table #] | accession # | coverage | score | distinct peptides | mass  | pl  | start AA           | end AA                                              | m/z obs                             | M obs                                | M calc | delta | miss | pept score | exp val | peptide                         | modifications   | retent time | Strongest gel slice | # gel slices found |
| BCG (3 hours), [ST4]        | Q16836      | 3%       | 53    | 1                 | 34313 | 8.9 | Q16836 HCDH_HUMAN  | Hydroxyacyl-coenzyme A dehydrogenase, mitochondrial | OS=Homo sapiens GN=HADH PE=1 SV=2   |                                      |        |       |      |            |         | 2.30E-03 K.AGDEFVEK.T           |                 | 14.47       | 15                  | 1                  |
| BCG (3 days), [ST6]         | Q16836      | 3%       | 40    | 1                 | 34313 | 8.9 | Q16836 HCDH_HUMAN  | Hydroxyacyl-coenzyme A dehydrogenase, mitochondrial | OS=Homo sapiens GN=HADH PE=1 SV=2   |                                      |        |       |      |            |         | 1.90E-02 K.AGDEFVEK.T           |                 | 20.7        | 20                  | 1                  |
| Experiment [Suppl. Table #] | accession # | coverage | score | distinct peptides | mass  | pl  | start AA           | end AA                                              | m/z obs                             | M obs                                | M calc | delta | miss | pept score | exp val | peptide                         | modifications   | retent time | Strongest gel slice | # gel slices found |
| BCG (1 day), [ST5]          | P14174      | 10%      | 67    | 1                 | 12639 | 7.7 | P14174 MIF_HUMAN   | Macrophage migration inhibitory factor              | OS=Homo sapiens GN=MIF PE=1 SV=4    |                                      |        |       |      |            |         | 1.30E-05 M.PMFIVNTNVPR.A        |                 | 19.23       | 43                  | 1                  |
| BCG (3 days), [ST6]         | P14174      | 10%      | 47    | 1                 | 12639 | 7.7 | P14174 MIF_HUMAN   | Macrophage migration inhibitory factor              | OS=Homo sapiens GN=MIF PE=1 SV=4    |                                      |        |       |      |            |         | 1.40E-03 M.PMFIVNTNVPR.A        | Oxidation (M)   | 26.48       | 36                  | 1                  |
| BCG (3 days), [ST7]         | P14174      | 10%      | 44    | 1                 | 12639 | 7.7 | P14174 MIF_HUMAN   | Macrophage migration inhibitory factor              | OS=Homo sapiens GN=MIF PE=1 SV=4    |                                      |        |       |      |            |         | 2.90E-03 M.PMFIVNTNVPR.A        | Oxidation (M)   | 19.66       | 46                  | 1                  |
| Experiment [Suppl. Table #] | accession # | coverage | score | distinct peptides | mass  | pl  | start AA           | end AA                                              | m/z obs                             | M obs                                | M calc | delta | miss | pept score | exp val | peptide                         | modifications   | retent time | Strongest gel slice | # gel slices found |
| BCG (3 hours), [ST4]        | P43307      | 3%       | 40    | 1                 | 32215 | 4.4 | P43307 SSRA_HUMAN  | Translocon-associated protein subunit alpha         | OS=Homo sapiens GN=SSR1 PE=1 SV=3   |                                      |        |       |      |            |         | 4.00E-03 K.FLVGFTNK.G           |                 | 21.01       | 14                  | 1                  |
| BCG (3 days), [ST6]         | P43307      | 3%       | 66    | 1                 | 32215 | 4.4 | P43307 SSRA_HUMAN  | Translocon-associated protein subunit alpha         | OS=Homo sapiens GN=SSR1 PE=1 SV=3   |                                      |        |       |      |            |         | 1.90E-02 K.FLVGFTNK.G           |                 | 30.21       | 19                  | 3                  |
| BCG (5 days), [ST8]         | P43307      | 3%       | 68    | 1                 | 32215 | 4.4 | P43307 SSRA_HUMAN  | Translocon-associated protein subunit alpha         | OS=Homo sapiens GN=SSR1 PE=1 SV=3   |                                      |        |       |      |            |         | 3.80E-03 K.FLVGFTNK.G           |                 | 20.55       | 16                  | 1                  |
| Experiment [Suppl. Table #] | accession # | coverage | score | distinct peptides | mass  | pl  | start AA           | end AA                                              | m/z obs                             | M obs                                | M calc | delta | miss | pept score | exp val | peptide                         | modifications   | retent time | Strongest gel slice | # gel slices found |
| BCG (1 day), [ST5]          | Q9BVK6      | 5%       | 69    | 1                 | 25203 | 6.7 | Q9BVK6 TMED9_HUMAN | Transmembrane emp24 domain-containing protein 9     | OS=Homo sapiens GN=TMED9 PE=1 SV=1  |                                      |        |       |      |            |         | 1.00E-03 R.QLVLEQVEIQIQK.E      |                 | 18.83       | 37                  | 1                  |
| BCG (3 days), [ST6]         | Q9BVK6      | 5%       | 103   | 1                 | 25203 | 6.7 | Q9BVK6 TMED9_HUMAN | Transmembrane emp24 domain-containing protein 9     | OS=Homo sapiens GN=TMED9 PE=1 SV=1  |                                      |        |       |      |            |         | 2.40E-04 R.QLVLEQVEIQIQK.E      |                 | 25.88       | 25                  | 2                  |
| BCG (5 days), [ST8]         | Q9BVK6      | 5%       | 148   | 1                 | 25203 | 6.7 | Q9BVK6 TMED9_HUMAN | Transmembrane emp24 domain-containing protein 9     | OS=Homo sapiens GN=TMED9 PE=1 SV=1  |                                      |        |       |      |            |         | 7.50E-08 R.QLVLEQVEIQIQK.E      |                 | 19.82       | 22                  | 3                  |
| Experiment [Suppl. Table #] | accession # | coverage | score | distinct peptides | mass  | pl  | start AA           | end AA                                              | m/z obs                             | M obs                                | M calc | delta | miss | pept score | exp val | peptide                         | modifications   | retent time | Strongest gel slice | # gel slices found |

|                             |             |          |       |                   |        |     |                    |                                                                |                                     |                                                                      |        |       |      |            |         |         |               |             |                     |                    |
|-----------------------------|-------------|----------|-------|-------------------|--------|-----|--------------------|----------------------------------------------------------------|-------------------------------------|----------------------------------------------------------------------|--------|-------|------|------------|---------|---------|---------------|-------------|---------------------|--------------------|
| BCG (3 days, a), [ST6]      | P35268      | 10%      | 61    | 1                 | 14835  | 9.2 | P35268 RL22_HUMAN  | 60S ribosomal protein L22                                      | OS=Homo sapiens GN=RPL22 PE=1 SV=2  | 53 65 621.85 1241.69 1241.67 0.02 0 61 6.60E-05 K.AGNLGGGVVTIER.S    | 25.91  | 33    | 1    |            |         |         |               |             |                     |                    |
| BCG (3 days, b), [ST7]      | P35268      | 10%      | 51    | 1                 | 14835  | 9.2 | P35268 RL22_HUMAN  | 60S ribosomal protein L22                                      | OS=Homo sapiens GN=RPL22 PE=1 SV=2  | 53 65 621.81 1241.6 1241.67 -0.07 0 51 6.70E-04 K.AGNLGGGVVTIER.S    | 19.27  | 37    | 1    |            |         |         |               |             |                     |                    |
| beads (3 hours), [ST9]      | P35268      | 10%      | 56    | 1                 | 14835  | 9.2 | P35268 RL22_HUMAN  | 60S ribosomal protein L22                                      | OS=Homo sapiens GN=RPL22 PE=1 SV=2  | 53 65 621.74 1241.47 1241.67 -0.2 0 56 2.00E-04 K.AGNLGGGVVTIER.S    | 20.77  | 32    | 2    |            |         |         |               |             |                     |                    |
| beads (3 days), [ST10]      | P35268      | 10%      | 76    | 1                 | 14835  | 9.2 | P35268 RL22_HUMAN  | 60S ribosomal protein L22                                      | OS=Homo sapiens GN=RPL22 PE=1 SV=2  | 53 65 621.89 1241.76 1241.67 0.08 0 55 2.70E-04 K.AGNLGGGVVTIER.S    | 25.66  | 31    | 1    |            |         |         |               |             |                     |                    |
| beads (5 days), [ST11]      | P35268      | 10%      | 57    | 1                 | 14835  | 9.2 | P35268 RL22_HUMAN  | 60S ribosomal protein L22                                      | OS=Homo sapiens GN=RPL22 PE=1 SV=2  | 53 65 621.82 1241.62 1241.67 -0.06 0 57 1.50E-04 K.AGNLGGGVVTIER.S   | 20.3   | 28    | 1    |            |         |         |               |             |                     |                    |
| Experiment [Suppl. Table #] | accession # | coverage | score | distinct peptides | mass   | pl  | start AA           | end AA                                                         | m/z obs                             | M obs                                                                | M calc | delta | miss | pept score | exp val | peptide | modifications | retent time | Strongest gel slice | # gel slices found |
| BCG (3 hours), [ST4]        | P36542      | 3%       | 66    | 1                 | 33032  | 9.2 | P36542 ATPG_HUMAN  | ATP synthase subunit gamma, mitochondrial                      | OS=Homo sapiens GN=ATP5C1 PE=1 SV=1 | 127 136 538.8 1075.58 1075.56 0.02 0 38 1.20E-02 K.EVMLVIGDGK.I      | 20.23  | 16    | 1    |            |         |         |               |             |                     |                    |
| BCG (3 days, b), [ST7]      | P36542      | 4%       | 62    | 1                 | 33032  | 9.2 | P36542 ATPG_HUMAN  | ATP synthase subunit gamma, mitochondrial                      | OS=Homo sapiens GN=ATP5C1 PE=1 SV=1 | 116 126 524.28 1046.54 1046.56 -0.02 0 42 5.10E-03 K.SEVATLTAAGK.E   | 14.93  | 18    | 1    |            |         |         |               |             |                     |                    |
| beads (3 hours), [ST9]      | P36542      | 3%       | 58    | 1                 | 33032  | 9.2 | P36542 ATPG_HUMAN  | ATP synthase subunit gamma, mitochondrial                      | OS=Homo sapiens GN=ATP5C1 PE=1 SV=1 | 127 136 538.77 1075.53 1075.56 -0.02 0 40 8.00E-03 K.EVMLVIGDGK.I    | 20.45  | 20    | 1    |            |         |         |               |             |                     |                    |
| beads (3 days), [ST10]      | P36542      | 3%       | 59    | 1                 | 33032  | 9.2 | P36542 ATPG_HUMAN  | ATP synthase subunit gamma, mitochondrial                      | OS=Homo sapiens GN=ATP5C1 PE=1 SV=1 | 127 136 538.8 1075.58 1075.56 0.02 0 34 2.80E-02 K.EVMLVIGDGK.I      | 33.12  | 20    | 1    |            |         |         |               |             |                     |                    |
| Experiment [Suppl. Table #] | accession # | coverage | score | distinct peptides | mass   | pl  | start AA           | end AA                                                         | m/z obs                             | M obs                                                                | M calc | delta | miss | pept score | exp val | peptide | modifications | retent time | Strongest gel slice | # gel slices found |
| BCG (3 hours), [ST4]        | P27824      | 2%       | 89    | 1                 | 67982  | 4.5 | P27824 CALX_HUMAN  | Calnexin                                                       | OS=Homo sapiens GN=CANX PE=1 SV=2   | 574 582 544.77 1087.53 1087.51 0.01 0 59 1.20E-04 K.AEEDEILNR.S      | 18.43  | 4     | 2    |            |         |         |               |             |                     |                    |
| BCG (3 days, b), [ST7]      | P27824      | 2%       | 100   | 1                 | 67982  | 4.5 | P27824 CALX_HUMAN  | Calnexin                                                       | OS=Homo sapiens GN=CANX PE=1 SV=2   | 574 582 544.75 1087.48 1087.51 -0.04 0 49 9.90E-04 K.AEEDEILNR.S     | 16.98  | 7     | 1    |            |         |         |               |             |                     |                    |
| beads (3 hours), [ST9]      | P27824      | 2%       | 149   | 1                 | 67982  | 4.5 | P27824 CALX_HUMAN  | Calnexin                                                       | OS=Homo sapiens GN=CANX PE=1 SV=2   | 574 582 544.77 1087.53 1087.51 0.01 0 57 1.80E-04 K.AEEDEILNR.S      | 16.59  | 5     | 2    |            |         |         |               |             |                     |                    |
| beads (3 days), [ST10]      | P27824      | 2%       | 97    | 1                 | 67982  | 4.5 | P27824 CALX_HUMAN  | Calnexin                                                       | OS=Homo sapiens GN=CANX PE=1 SV=2   | 574 582 544.78 1087.55 1087.51 0.04 0 55 2.60E-04 K.AEEDEILNR.S      | 32.56  | 6     | 1    |            |         |         |               |             |                     |                    |
| Experiment [Suppl. Table #] | accession # | coverage | score | distinct peptides | mass   | pl  | start AA           | end AA                                                         | m/z obs                             | M obs                                                                | M calc | delta | miss | pept score | exp val | peptide | modifications | retent time | Strongest gel slice | # gel slices found |
| BCG (3 hours), [ST4]        | P00403      | 3%       | 61    | 1                 | 25719  | 4.7 | P00403 COX2_HUMAN  | Cytochrome c oxidase subunit 2                                 | OS=Homo sapiens GN=MT-CO2 PE=1 SV=1 | 135 141 422.69 843.37 843.45 -0.08 0 34 3.90E-02 R.LLDDVNR.V         | 17.79  | 23    | 1    |            |         |         |               |             |                     |                    |
| BCG (3 days, a), [ST6]      | P00403      | 3%       | 47    | 1                 | 25719  | 4.7 | P00403 COX2_HUMAN  | Cytochrome c oxidase subunit 2                                 | OS=Homo sapiens GN=MT-CO2 PE=1 SV=1 | 172 178 365.23 728.45 728.38 0.07 0 41 6.80E-03 K.TDAIPGR.L          | 18.25  | 29    | 1    |            |         |         |               |             |                     |                    |
| beads (3 hours), [ST9]      | P00403      | 3%       | 89    | 1                 | 25719  | 4.7 | P00403 COX2_HUMAN  | Cytochrome c oxidase subunit 2                                 | OS=Homo sapiens GN=MT-CO2 PE=1 SV=1 | 172 178 365.17 728.33 728.38 -0.05 0 36 2.20E-02 K.TDAIPGR.L         | 14.18  | 26    | 1    |            |         |         |               |             |                     |                    |
| beads (3 days), [ST10]      | P00403      | 3%       | 68    | 1                 | 25719  | 4.7 | P00403 COX2_HUMAN  | Cytochrome c oxidase subunit 2                                 | OS=Homo sapiens GN=MT-CO2 PE=1 SV=1 | 172 178 365.22 728.42 728.38 0.04 0 42 5.80E-03 K.TDAIPGR.L          | 17.04  | 29    | 1    |            |         |         |               |             |                     |                    |
| Experiment [Suppl. Table #] | accession # | coverage | score | distinct peptides | mass   | pl  | start AA           | end AA                                                         | m/z obs                             | M obs                                                                | M calc | delta | miss | pept score | exp val | peptide | modifications | retent time | Strongest gel slice | # gel slices found |
| BCG (3 hours), [ST4]        | Q9UEUO      | 4%       | 79    | 1                 | 26672  | 9   | Q9UEUO VT11B_HUMAN | Vesicle transport through interaction with t-SNAREs homolog 1B | OS=Homo sapiens GN=VT11B PE=2 SV=3  | 181 190 552.8 1103.58 1103.58 0 0 57 1.50E-04 R.LVNTSENLSK.S         | 13.85  | 18    | 1    |            |         |         |               |             |                     |                    |
| BCG (3 days, b), [ST7]      | Q9UEUO      | 4%       | 39    | 1                 | 26672  | 9   | Q9UEUO VT11B_HUMAN | Vesicle transport through interaction with t-SNAREs homolog 1B | OS=Homo sapiens GN=VT11B PE=2 SV=3  | 181 190 552.76 1103.5 1103.58 -0.08 0 39 9.90E-03 R.LVNTSENLSK.S     | 13.07  | 40    | 1    |            |         |         |               |             |                     |                    |
| beads (3 hours), [ST9]      | Q9UEUO      | 4%       | 44    | 1                 | 26672  | 9   | Q9UEUO VT11B_HUMAN | Vesicle transport through interaction with t-SNAREs homolog 1B | OS=Homo sapiens GN=VT11B PE=2 SV=3  | 181 190 552.75 1103.48 1103.58 -0.1 0 44 3.50E-03 R.LVNTSENLSK.S     | 14.54  | 32    | 1    |            |         |         |               |             |                     |                    |
| beads (3 days), [ST10]      | Q9UEUO      | 4%       | 74    | 1                 | 26672  | 9   | Q9UEUO VT11B_HUMAN | Vesicle transport through interaction with t-SNAREs homolog 1B | OS=Homo sapiens GN=VT11B PE=2 SV=3  | 181 190 552.83 1103.65 1103.58 0.06 0 47 1.50E-03 R.LVNTSENLSK.S     | 18.18  | 23    | 1    |            |         |         |               |             |                     |                    |
| Experiment [Suppl. Table #] | accession # | coverage | score | distinct peptides | mass   | pl  | start AA           | end AA                                                         | m/z obs                             | M obs                                                                | M calc | delta | miss | pept score | exp val | peptide | modifications | retent time | Strongest gel slice | # gel slices found |
| BCG (1 day), [ST5]          | P63220      | 12%      | 53    | 1                 | 9220   | 8.7 | P63220 RS21_HUMAN  | 40S ribosomal protein S21                                      | OS=Homo sapiens GN=RPS21 PE=1 SV=1  | 62 71 569.66 1137.31 1137.5 -0.19 0 43 1.70E-03 R.MGESDSSILR.L       | 14.64  | 43    | 1    |            |         |         |               |             |                     |                    |
| BCG (3 days, b), [ST7]      | P63220      | 12%      | 81    | 1                 | 9220   | 8.7 | P63220 RS21_HUMAN  | 40S ribosomal protein S21                                      | OS=Homo sapiens GN=RPS21 PE=1 SV=1  | 62 71 569.7 1137.39 1137.5 -0.1 0 81 4.40E-07 R.MGESDSSILR.L         | 15.35  | 43    | 2    |            |         |         |               |             |                     |                    |
| beads (3 days), [ST10]      | P63220      | 12%      | 60    | 1                 | 9220   | 8.7 | P63220 RS21_HUMAN  | 40S ribosomal protein S21                                      | OS=Homo sapiens GN=RPS21 PE=1 SV=1  | 62 71 569.78 1137.55 1137.5 0.05 0 60 6.10E-05 R.MGESDSSILR.L        | 24.56  | 35    | 1    |            |         |         |               |             |                     |                    |
| Experiment [Suppl. Table #] | accession # | coverage | score | distinct peptides | mass   | pl  | start AA           | end AA                                                         | m/z obs                             | M obs                                                                | M calc | delta | miss | pept score | exp val | peptide | modifications | retent time | Strongest gel slice | # gel slices found |
| BCG (3 days, a), [ST6]      | P63010      | 1%       | 72    | 1                 | 105398 | 5.2 | P63010 AP2B1_HUMAN | AP-2 complex subunit beta-1                                    | OS=Homo sapiens GN=AP2B1 PE=1 SV=1  | 868 878 639.36 1276.71 1276.68 0.03 0 36 1.70E-02 K.LQNNVYTIK.R      | 26.26  | 5     | 1    |            |         |         |               |             |                     |                    |
| BCG (5 days), [ST8]         | P63010      | 1%       | 54    | 1                 | 105398 | 5.2 | P63010 AP2B1_HUMAN | AP-2 complex subunit beta-1                                    | OS=Homo sapiens GN=AP2B1 PE=1 SV=1  | 868 878 639.32 1276.64 1276.68 -0.04 0 54 3.10E-04 K.LQNNVYTIK.R     | 17.05  | 5     | 1    |            |         |         |               |             |                     |                    |
| Experiment [Suppl. Table #] | accession # | coverage | score | distinct peptides | mass   | pl  | start AA           | end AA                                                         | m/z obs                             | M obs                                                                | M calc | delta | miss | pept score | exp val | peptide | modifications | retent time | Strongest gel slice | # gel slices found |
| BCG (3 hours), [ST4]        | P30049      | 5%       | 51    | 1                 | 17479  | 5.4 | P30049 ATPD_HUMAN  | ATP synthase subunit delta, mitochondrial                      | OS=Homo sapiens GN=ATP5D PE=1 SV=2  | 157 165 493.72 985.43 985.54 -0.11 0 51 6.50E-04 R.IEANEALVKA        | 17.06  | 28    | 1    |            |         |         |               |             |                     |                    |
| BCG (3 days, b), [ST7]      | P30049      | 8%       | 66    | 1                 | 17479  | 5.4 | P30049 ATPD_HUMAN  | ATP synthase subunit delta, mitochondrial                      | OS=Homo sapiens GN=ATP5D PE=1 SV=2  | 137 150 716.32 1430.63 1430.7 -0.07 0 59 9.00E-05 K.AQALVGTADAEAT.R  | 16.07  | 37    | 1    |            |         |         |               |             |                     |                    |
| beads (3 days), [ST10]      | P30049      | 5%       | 46    | 1                 | 17479  | 5.4 | P30049 ATPD_HUMAN  | ATP synthase subunit delta, mitochondrial                      | OS=Homo sapiens GN=ATP5D PE=1 SV=2  | 157 165 493.8 985.59 985.54 0.05 0 46 1.90E-03 R.IEANEALVKA          | 22.7   | 32    | 1    |            |         |         |               |             |                     |                    |
| Experiment [Suppl. Table #] | accession # | coverage | score | distinct peptides | mass   | pl  | start AA           | end AA                                                         | m/z obs                             | M obs                                                                | M calc | delta | miss | pept score | exp val | peptide | modifications | retent time | Strongest gel slice | # gel slices found |
| BCG (1 day), [ST5]          | P61160      | 3%       | 37    | 1                 | 45017  | 6.3 | P61160 ARP2_HUMAN  | Actin-related protein 2                                        | OS=Homo sapiens GN=ACTR2 PE=1 SV=1  | 107 118 685.27 1368.52 1368.73 -0.22 0 34 2.40E-02 K.ILLTEPPMNP.TK.N | 18.86  | 31    | 1    |            |         |         |               |             |                     |                    |
| BCG (5 days), [ST8]         | P61160      | 2%       | 45    | 1                 | 45017  | 6.3 | P61160 ARP2_HUMAN  | Actin-related protein 2                                        | OS=Homo sapiens GN=ACTR2 PE=1 SV=1  | 47 53 386.71 771.41 771.45 -0.03 0 40 1.00E-02 K.VGNIEIK.D           | 14.61  | 13    | 1    |            |         |         |               |             |                     |                    |
| beads (3 days), [ST10]      | P61160      | 3%       | 124   | 1                 | 45017  | 6.3 | P61160 ARP2_HUMAN  | Actin-related protein 2                                        | OS=Homo sapiens GN=ACTR2 PE=1 SV=1  | 107 118 685.48 1368.95 1368.73 0.22 0 34 2.30E-02 K.ILLTEPPMNP.TK.N  | 31.14  | 15    | 1    |            |         |         |               |             |                     |                    |
| Experiment [Suppl. Table #] | accession # | coverage | score | distinct peptides | mass   | pl  | start AA           | end AA                                                         | m/z obs                             | M obs                                                                | M calc | delta | miss | pept score | exp val | peptide | modifications | retent time | Strongest gel slice | # gel slices found |
| BCG (5 days), [ST8]         | O15511      | 8%       | 68    | 1                 | 16367  | 5.5 | O15511 ARPC5_HUMAN | Actin-related protein 2/3 complex subunit 5                    | OS=Homo sapiens GN=ARPC5 PE=1 SV=3  | 132 143 535.82 1069.62 1069.62 0 0 68 1.30E-05 K.ALAAGGVGSIVR.V      | 19.9   | 26    | 1    |            |         |         |               |             |                     |                    |
| beads (5 days), [ST11]      | O15511      | 8%       | 47    | 1                 | 16367  | 5.5 | O15511 ARPC5_HUMAN | Actin-related protein 2/3 complex subunit 5                    | OS=Homo sapiens GN=ARPC5 PE=1 SV=3  | 132 143 535.8 1069.58 1069.62 -0.04 0 47 1.50E-03 K.ALAAGGVGSIVR.V   | 20.37  | 27    | 1    |            |         |         |               |             |                     |                    |
| Experiment [Suppl. Table #] | accession # | coverage | score | distinct peptides | mass   | pl  | start AA           | end AA                                                         | m/z obs                             | M obs                                                                | M calc | delta | miss | pept score | exp val | peptide | modifications | retent time | Strongest gel slice | # gel slices found |
| BCG (3 hours), [ST4]        | P08758      | 3%       | 56    | 1                 | 35971  | 4.9 | P08758 ANXA5_HUMAN | Annexin A5                                                     | OS=Homo sapiens GN=ANXA5 PE=1 SV=2  | 109 117 501.32 1000.62 1000.59 0.03 0 33 4.00E-02 K.VLTHEIASR.T      | 20.29  | 15    | 1    |            |         |         |               |             |                     |                    |



|                             |             |          |       |                   |       |     |                                                                                                                                      |                                            |                                  |       |        |       |      |            |         |         |               |             |                     |                    |
|-----------------------------|-------------|----------|-------|-------------------|-------|-----|--------------------------------------------------------------------------------------------------------------------------------------|--------------------------------------------|----------------------------------|-------|--------|-------|------|------------|---------|---------|---------------|-------------|---------------------|--------------------|
| BCG (3 days, a), [ST6]      | P08758      | 3%       | 56    | 1                 | 35971 | 4.9 | P08758 ANXA5_HUMAN Annexin A5 OS=Homo sapiens GN=ANXA5 PE=1 SV=2                                                                     | 51 58 447.32 892.63 892.47 0.16 0 56       | 1.70E-04 R.QEISAAFK.T            | 26.2  | 19     | 3     |      |            |         |         |               |             |                     |                    |
| beads (5 days), [ST11]      | P08758      | 3%       | 50    | 1                 | 35971 | 4.9 | P08758 ANXA5_HUMAN Annexin A5 OS=Homo sapiens GN=ANXA5 PE=1 SV=2                                                                     | 109 117 501.3 1000.58 1000.59 -0.02 0 50   | 8.60E-04 K.VLTEIIASR.T           | 20.22 | 18     | 1     |      |            |         |         |               |             |                     |                    |
| Experiment [Suppl. Table #] | accession # | coverage | score | distinct peptides | mass  | pl  | start AA                                                                                                                             | end AA                                     | m/z obs                          | M obs | M calc | delta | miss | pept score | exp val | peptide | modifications | retent time | Strongest gel slice | # gel slices found |
| BCG (1 day), [ST5]          | P35613      | 2%       | 41    | 1                 | 42573 | 5.4 | P35613 BASI_HUMAN Basigin OS=Homo sapiens GN=BSG PE=1 SV=2                                                                           | 274 282 507.67 1013.33 1013.49 -0.17 0 41  | 4.50E-03 R.FFVSSSQGR.S           | 15.09 | 28     | 1     |      |            |         |         |               |             |                     |                    |
| BCG (3 days, b), [ST7]      | P35613      | 2%       | 60    | 1                 | 42573 | 5.4 | P35613 BASI_HUMAN Basigin OS=Homo sapiens GN=BSG PE=1 SV=2                                                                           | 274 282 507.75 1013.48 1013.49 -0.01 0 60  | 8.60E-05 R.FFVSSSQGR.S           | 16.18 | 12     | 3     |      |            |         |         |               |             |                     |                    |
| beads (5 days), [ST11]      | P35613      | 2%       | 41    | 1                 | 42573 | 5.4 | P35613 BASI_HUMAN Basigin OS=Homo sapiens GN=BSG PE=1 SV=2                                                                           | 274 282 507.75 1013.49 1013.49 0 41        | 6.40E-03 R.FFVSSSQGR.S           | 16.69 | 11     | 1     |      |            |         |         |               |             |                     |                    |
| Experiment [Suppl. Table #] | accession # | coverage | score | distinct peptides | mass  | pl  | start AA                                                                                                                             | end AA                                     | m/z obs                          | M obs | M calc | delta | miss | pept score | exp val | peptide | modifications | retent time | Strongest gel slice | # gel slices found |
| BCG (3 days, a), [ST6]      | P25774      | 3%       | 60    | 1                 | 38099 | 8.6 | P25774 CATS_HUMAN Cathepsin S OS=Homo sapiens GN=CTSS PE=1 SV=3                                                                      | 246 255 478.78 955.55 955.51 0.04 0 36     | 1.70E-02 K.GPVSVGVGDAR.H         | 22.29 | 25     | 1     |      |            |         |         |               |             |                     |                    |
| BCG (5 days), [ST8]         | P25774      | 3%       | 58    | 1                 | 38099 | 8.6 | P25774 CATS_HUMAN Cathepsin S OS=Homo sapiens GN=CTSS PE=1 SV=3                                                                      | 246 255 478.76 955.5 955.51 -0.01 0 58     | 1.00E-04 K.GPVSVGVGDAR.H         | 14.67 | 20     | 2     |      |            |         |         |               |             |                     |                    |
| beads (3 hours), [ST9]      | P25774      | 3%       | 53    | 1                 | 38099 | 8.6 | P25774 CATS_HUMAN Cathepsin S OS=Homo sapiens GN=CTSS PE=1 SV=3                                                                      | 197 207 608.25 1214.49 1214.55 -0.06 0 54  | 3.20E-04 K.GKSDASYPYK.A          | 19.65 | 22     | 3     |      |            |         |         |               |             |                     |                    |
| Experiment [Suppl. Table #] | accession # | coverage | score | distinct peptides | mass  | pl  | start AA                                                                                                                             | end AA                                     | m/z obs                          | M obs | M calc | delta | miss | pept score | exp val | peptide | modifications | retent time | Strongest gel slice | # gel slices found |
| BCG (1 day), [ST5]          | Q9Y678      | 1%       | 112   | 1                 | 98967 | 5.3 | Q9Y678 COPG_HUMAN Coatomer subunit gamma OS=Homo sapiens GN=COPG PE=1 SV=1                                                           | 33 42 593.73 1185.44 1185.61 -0.18 0 61    | 5.70E-05 R.VFNETPINPR.K          | 18.18 | 18     | 1     |      |            |         |         |               |             |                     |                    |
| BCG (5 days), [ST8]         | Q9Y678      | 1%       | 63    | 1                 | 98967 | 5.3 | Q9Y678 COPG_HUMAN Coatomer subunit gamma OS=Homo sapiens GN=COPG PE=1 SV=1                                                           | 33 42 593.79 1185.57 1185.61 -0.04 0 63    | 3.80E-05 R.VFNETPINPR.K          | 19.26 | 5      | 1     |      |            |         |         |               |             |                     |                    |
| Experiment [Suppl. Table #] | accession # | coverage | score | distinct peptides | mass  | pl  | start AA                                                                                                                             | end AA                                     | m/z obs                          | M obs | M calc | delta | miss | pept score | exp val | peptide | modifications | retent time | Strongest gel slice | # gel slices found |
| BCG (3 days, a), [ST6]      | O00299      | 5%       | 52    | 1                 | 27248 | 5.1 | O00299 CLIC1_HUMAN Chloride intracellular channel protein 1 OS=Homo sapiens GN=CLIC1 PE=1 SV=4                                       | 120 131 664.9 1327.79 1327.64 0.16 0 52    | 0.0004348 K.NSNPALNDNLEK.G       | 22.55 | 21     | 1     |      |            |         |         |               |             |                     |                    |
| Experiment [Suppl. Table #] | accession # | coverage | score | distinct peptides | mass  | pl  | start AA                                                                                                                             | end AA                                     | m/z obs                          | M obs | M calc | delta | miss | pept score | exp val | peptide | modifications | retent time | Strongest gel slice | # gel slices found |
| BCG (3 hours), [ST4]        | P23528      | 7%       | 98    | 1                 | 18719 | 8.2 | P23528 COF1_HUMAN Coffilin-1 OS=Homo sapiens GN=COF1 PE=1 SV=3                                                                       | 2 13 572.76 1143.61 1143.61 -0.1 0 88      | 1.40E-07 M.ASGVAVSDGVIK.V        | 21.59 | 25     | 1     |      |            |         |         |               |             |                     |                    |
| BCG (5 days), [ST8]         | P23528      | 7%       | 72    | 1                 | 18719 | 8.2 | P23528 COF1_HUMAN Coffilin-1 OS=Homo sapiens GN=COF1 PE=1 SV=3                                                                       | 2 13 572.81 1143.6 1143.61 -0.01 0 72      | 4.70E-06 M.ASGVAVSDGVIK.V        | 20.55 | 26     | 1     |      |            |         |         |               |             |                     |                    |
| beads (3 hours), [ST9]      | P23528      | 7%       | 51    | 1                 | 18719 | 8.2 | P23528 COF1_HUMAN Coffilin-1 OS=Homo sapiens GN=COF1 PE=1 SV=3                                                                       | 2 13 572.78 1143.55 1143.61 -0.06 0 48     | 1.30E-03 M.ASGVAVSDGVIK.V        | 21.57 | 29     | 1     |      |            |         |         |               |             |                     |                    |
| Experiment [Suppl. Table #] | accession # | coverage | score | distinct peptides | mass  | pl  | start AA                                                                                                                             | end AA                                     | m/z obs                          | M obs | M calc | delta | miss | pept score | exp val | peptide | modifications | retent time | Strongest gel slice | # gel slices found |
| BCG (3 hours), [ST4]        | Q9NX63      | 4%       | 67    | 1                 | 26421 | 8.5 | Q9NX63 CHCH3_HUMAN Coiled-coil-helix-coiled-coil-helix domain-containing protein 3, mitochondrial OS=Homo sapiens GN=CHCH3 PE=1 SV=1 | 28 35 473.24 944.47 944.49 -0.02 0 48      | 1.40E-03 R.LSENVIDR.M            | 15.66 | 18     | 1     |      |            |         |         |               |             |                     |                    |
| BCG (5 days), [ST8]         | Q9NX63      | 4%       | 45    | 1                 | 26421 | 8.5 | Q9NX63 CHCH3_HUMAN Coiled-coil-helix-coiled-coil-helix domain-containing protein 3, mitochondrial OS=Homo sapiens GN=CHCH3 PE=1 SV=1 | 96 104 487.25 972.49 972.5 -0.01 0 42      | 6.10E-03 R.AAANEQLTR.A           | 12.84 | 20     | 1     |      |            |         |         |               |             |                     |                    |
| beads (3 days), [ST10]      | Q9NX63      | 4%       | 85    | 1                 | 26421 | 8.5 | Q9NX63 CHCH3_HUMAN Coiled-coil-helix-coiled-coil-helix domain-containing protein 3, mitochondrial OS=Homo sapiens GN=CHCH3 PE=1 SV=1 | 96 104 487.28 972.55 972.5 0.05 0 67       | 1.70E-05 R.AAANEQLTR.A           | 16.62 | 23     | 1     |      |            |         |         |               |             |                     |                    |
| Experiment [Suppl. Table #] | accession # | coverage | score | distinct peptides | mass  | pl  | start AA                                                                                                                             | end AA                                     | m/z obs                          | M obs | M calc | delta | miss | pept score | exp val | peptide | modifications | retent time | Strongest gel slice | # gel slices found |
| BCG (3 days, a), [ST6]      | P22695      | 4%       | 86    | 1                 | 48584 | 8.7 | P22695 QCR2_HUMAN Cytochrome b-c1 complex subunit 2, mitochondrial OS=Homo sapiens GN=UQCRC2 PE=1 SV=3                               | 360 375 816.02 1630.02 1629.83 0.19 0 55   | 1.90E-04 K.TIAQGNLSNTDQAAK.N     | 25.19 | 14     | 1     |      |            |         |         |               |             |                     |                    |
| BCG (5 days), [ST8]         | P22695      | 4%       | 122   | 1                 | 48584 | 8.7 | P22695 QCR2_HUMAN Cytochrome b-c1 complex subunit 2, mitochondrial OS=Homo sapiens GN=UQCRC2 PE=1 SV=3                               | 360 375 815.89 1629.77 1629.83 -0.07 0 122 | 4.30E-11 K.TIAQGNLSNTDQAAK.N     | 15.78 | 12     | 1     |      |            |         |         |               |             |                     |                    |
| beads (3 days), [ST10]      | P22695      | 4%       | 151   | 1                 | 48584 | 8.7 | P22695 QCR2_HUMAN Cytochrome b-c1 complex subunit 2, mitochondrial OS=Homo sapiens GN=UQCRC2 PE=1 SV=3                               | 360 375 815.98 1629.95 1629.83 0.12 0 99   | 8.40E-09 K.TIAQGNLSNTDQAAK.N     | 28.8  | 14     | 1     |      |            |         |         |               |             |                     |                    |
| Experiment [Suppl. Table #] | accession # | coverage | score | distinct peptides | mass  | pl  | start AA                                                                                                                             | end AA                                     | m/z obs                          | M obs | M calc | delta | miss | pept score | exp val | peptide | modifications | retent time | Strongest gel slice | # gel slices found |
| BCG (3 days, b), [ST7]      | O15372      | 5%       | 46    | 1                 | 40076 | 6.1 | O15372 EIF3H_HUMAN Eukaryotic translation initiation factor 3 subunit H OS=Homo sapiens GN=EIF3H PE=1 SV=1                           | 6 24 814.36 1626.71 1626.73 -0.02 0 46     | 1.80E-03 K.EGTGSTATSSSSTAGAAGK.G | 11.96 | 16     | 1     |      |            |         |         |               |             |                     |                    |
| BCG (5 days), [ST8]         | O15372      | 5%       | 95    | 1                 | 40076 | 6.1 | O15372 EIF3H_HUMAN Eukaryotic translation initiation factor 3 subunit H OS=Homo sapiens GN=EIF3H PE=1 SV=1                           | 6 24 814.37 1626.73 1626.73 0 79           | 8.70E-07 K.EGTGSTATSSSSTAGAAGK.G | 12.28 | 14     | 1     |      |            |         |         |               |             |                     |                    |
| beads (5 days), [ST11]      | O15372      | 5%       | 41    | 1                 | 40076 | 6.1 | O15372 EIF3H_HUMAN Eukaryotic translation initiation factor 3 subunit H OS=Homo sapiens GN=EIF3H PE=1 SV=1                           | 6 24 814.4 1626.79 1626.73 0.06 0 41       | 5.90E-03 K.EGTGSTATSSSSTAGAAGK.G | 12.31 | 15     | 1     |      |            |         |         |               |             |                     |                    |
| Experiment [Suppl. Table #] | accession # | coverage | score | distinct peptides | mass  | pl  | start AA                                                                                                                             | end AA                                     | m/z obs                          | M obs | M calc | delta | miss | pept score | exp val | peptide | modifications | retent time | Strongest gel slice | # gel slices found |
| BCG (3 days, b), [ST7]      | Q9H3U5      | 3%       | 48    | 1                 | 51973 | 6.3 | Q9H3U5 MFSD1_HUMAN Major facilitator superfamily domain-containing protein 1 OS=Homo sapiens GN=MFSD1 PE=2 SV=2                      | 10 21 592.79 1183.57 1183.58 -0.02 0 48    | 1.10E-03 R.ALLAGGPDEADR.G        | 18.07 | 1      | 1     |      |            |         |         |               |             |                     |                    |
| BCG (5 days), [ST8]         | Q9H3U5      | 3%       | 38    | 1                 | 51973 | 6.3 | Q9H3U5 MFSD1_HUMAN Major facilitator superfamily domain-containing protein 1 OS=Homo sapiens GN=MFSD1 PE=2 SV=2                      | 10 21 592.79 1183.56 1183.58 -0.02 0 38    | 1.00E-02 R.ALLAGGPDEADR.G        | 17.72 | 1      | 1     |      |            |         |         |               |             |                     |                    |
| Experiment [Suppl. Table #] | accession # | coverage | score | distinct peptides | mass  | pl  | start AA                                                                                                                             | end AA                                     | m/z obs                          | M obs | M calc | delta | miss | pept score | exp val | peptide | modifications | retent time | Strongest gel slice | # gel slices found |
| BCG (3 days, a), [ST6]      | O15427      | 3%       | 71    | 1                 | 50064 | 8.2 | O15427 MOT4_HUMAN Monocarboxylate transporter 4 OS=Homo sapiens GN=SLC16A3 PE=1 SV=1                                                 | 2 14 593.33 1184.65 1184.6 0.05 0 50       | 7.40E-04 M.GGAVVDEGPTGVK.A       | 19.97 | 2      | 2     |      |            |         |         |               |             |                     |                    |
| BCG (3 days, b), [ST7]      | O15427      | 3%       | 86    | 1                 | 50064 | 8.2 | O15427 MOT4_HUMAN Monocarboxylate transporter 4 OS=Homo sapiens GN=SLC16A3 PE=1 SV=1                                                 | 2 14 593.31 1184.6 1184.6 -0.01 0 39       | 9.50E-03 M.GGAVVDEGPTGVK.A       | 13.91 | 1      | 2     |      |            |         |         |               |             |                     |                    |
| beads (3 days), [ST10]      | O15427      | 3%       | 70    | 1                 | 50064 | 8.2 | O15427 MOT4_HUMAN Monocarboxylate transporter 4 OS=Homo sapiens GN=SLC16A3 PE=1 SV=1                                                 | 2 14 593.38 1184.74 1184.6 0.14 0 48       | 1.40E-03 M.GGAVVDEGPTGVK.A       | 21.44 | 1      | 1     |      |            |         |         |               |             |                     |                    |
| Experiment [Suppl. Table #] | accession # | coverage | score | distinct peptides | mass  | pl  | start AA                                                                                                                             | end AA                                     | m/z obs                          | M obs | M calc | delta | miss | pept score | exp val | peptide | modifications | retent time | Strongest gel slice | # gel slices found |
| BCG (3 hours), [ST4]        | Q16718      | 8%       | 69    | 1                 | 13507 | 5.8 | Q16718 NDUA5_HUMAN NADH dehydrogenase [ubiquinone] 1 alpha subcomplex subunit 5 OS=Homo sapiens GN=NDUF5A PE=1 SV=3                  | 47 55 563.22 1124.42 1124.53 -0.12 0 54    | 2.50E-04 K.YTEQITNEK.L           | 14.51 | 30     | 1     |      |            |         |         |               |             |                     |                    |
| BCG (3 days, a), [ST6]      | Q16718      | 8%       | 51    | 1                 | 13507 | 5.8 | Q16718 NDUA5_HUMAN NADH dehydrogenase [ubiquinone] 1 alpha subcomplex subunit 5 OS=Homo sapiens GN=NDUF5A PE=1 SV=3                  | 47 55 563.31 1124.6 1124.53 0.07 0 51      | 4.80E-04 K.YTEQITNEK.L           | 18.59 | 35     | 1     |      |            |         |         |               |             |                     |                    |
| beads (3 days), [ST10]      | Q16718      | 8%       | 54    | 1                 | 13507 | 5.8 | Q16718 NDUA5_HUMAN NADH dehydrogenase [ubiquinone] 1 alpha subcomplex subunit 5 OS=Homo sapiens GN=NDUF5A PE=1 SV=3                  | 47 55 563.32 1124.63 1124.53 0.1 0 54      | 2.50E-04 K.YTEQITNEK.L           | 18.71 | 34     | 1     |      |            |         |         |               |             |                     |                    |
| Experiment [Suppl. Table #] | accession # | coverage | score | distinct peptides | mass  | pl  | start AA                                                                                                                             | end AA                                     | m/z obs                          | M obs | M calc | delta | miss | pept score | exp val | peptide | modifications | retent time | Strongest gel slice | # gel slices found |
| BCG (3 hours), [ST4]        | P16671      | 2%       | 82    | 1                 | 53589 | 8.2 | P16671 CD36_HUMAN Platelet glycoprotein 4 OS=Homo sapiens GN=CD36 PE=1 SV=2                                                          | 224 231 461.76 921.51 921.52 0 0 47        | 1.20E-03 K.VAIDITYK.G            | 20.13 | 4      | 2     |      |            |         |         |               |             |                     |                    |
| BCG (3 days, b), [ST7]      | P16671      | 2%       | 57    | 1                 | 53589 | 8.2 | P16671 CD36_HUMAN Platelet glycoprotein 4 OS=Homo sapiens GN=CD36 PE=1 SV=2                                                          |                                            |                                  |       |        |       |      |            |         |         |               |             |                     |                    |

|                                                    |                    |             |           |                     |             |         |                                                                                                           |                                                    |                      |             |                     |                      |  |  |
|----------------------------------------------------|--------------------|-------------|-----------|---------------------|-------------|---------|-----------------------------------------------------------------------------------------------------------|----------------------------------------------------|----------------------|-------------|---------------------|----------------------|--|--|
| beads (3 hours), [ST9]                             | P16671             | 2%          | 104       | 1                   | 53589       | 8.2     | P16671 CD36_HUMAN Platelet glycoprotein 4 OS=Homo sapiens GN=CD36 PE=1 SV=2                               | 224 231 461.75 921.49 921.52 -0.02 0 34 2.90E-02   | K.VAIDITYK.G         | 19.37       |                     |                      |  |  |
|                                                    |                    |             |           |                     |             |         |                                                                                                           | 224 231 461.75 921.49 921.52 -0.03 0 48 1.20E-03   | K.VAIDITYK.G         | 19.7        |                     |                      |  |  |
| Experiment [Suppl. Table #] BCG (3 days, b), [ST7] | accession # P25788 | coverage 5% | score 70  | distinct peptides 1 | mass 28643  | pI 5.2  | P25788 PSA3_HUMAN Proteasome subunit alpha type-3 OS=Homo sapiens GN=PSMA3 PE=1 SV=2                      | 30 41 609.31 1216.61 1216.64 -0.03 0 62 4.90E-05   | K.AVENSSSTAIGR.C     | 15.5        | Strongest gel slice | # gel slices found 4 |  |  |
| BCG (5 days), [ST8]                                | P25788             | 5%          | 105       | 1                   | 28643       | 5.2     | P25788 PSA3_HUMAN Proteasome subunit alpha type-3 OS=Homo sapiens GN=PSMA3 PE=1 SV=2                      | 30 41 609.34 1216.66 1216.64 0.02 0 57 1.50E-04    | K.AVENSSSTAIGR.C     | 15.6        | 19                  | 1                    |  |  |
| beads (5 days), [ST11]                             | P25788             | 5%          | 80        | 1                   | 28643       | 5.2     | P25788 PSA3_HUMAN Proteasome subunit alpha type-3 OS=Homo sapiens GN=PSMA3 PE=1 SV=2                      | 30 41 609.33 1216.65 1216.64 0.01 0 50 7.50E-04    | K.AVENSSSTAIGR.C     | 17.15       | 20                  | 1                    |  |  |
| Experiment [Suppl. Table #] BCG (3 days, b), [ST7] | accession # P28072 | coverage 5% | score 52  | distinct peptides 1 | mass 25570  | pI 4.8  | P28072 PSB6_HUMAN Proteasome subunit beta type-6 OS=Homo sapiens GN=PSMB6 PE=1 SV=4                       | 210 220 558.28 1114.55 1114.6 -0.05 0 52 4.90E-04  | R.LAAIESGVER.Q       | 16.49       | Strongest gel slice | # gel slices found 1 |  |  |
| BCG (5 days), [ST8]                                | P28072             | 5%          | 46        | 1                   | 25570       | 4.8     | P28072 PSB6_HUMAN Proteasome subunit beta type-6 OS=Homo sapiens GN=PSMB6 PE=1 SV=4                       | 210 220 558.3 1114.59 1114.6 -0.01 0 45 2.30E-03   | R.LAAIESGVER.Q       | 17.16       | 22                  | 1                    |  |  |
| beads (5 days), [ST11]                             | P28072             | 5%          | 70        | 1                   | 25570       | 4.8     | P28072 PSB6_HUMAN Proteasome subunit beta type-6 OS=Homo sapiens GN=PSMB6 PE=1 SV=4                       | 210 220 558.32 1114.63 1114.6 0.03 0 70 7.10E-06   | R.LAAIESGVER.Q       | 17.64       | 23                  | 1                    |  |  |
| Experiment [Suppl. Table #] BCG (3 hours), [ST4]   | accession # Q9UL25 | coverage 7% | score 110 | distinct peptides 1 | mass 24731  | pI 8.1  | Q9UL25 RAB21_HUMAN Ras-related protein Rab-21 OS=Homo sapiens GN=RAB21 PE=1 SV=3                          | 2 16 557.3 1112.58 1112.53 0.05 0 110 7.30E-10     | M.AAAGGGGGGAAAAGR.A  | 13.26       | Strongest gel slice | # gel slices found 1 |  |  |
| BCG (5 days), [ST8]                                | Q9UL25             | 7%          | 94        | 1                   | 24731       | 8.1     | Q9UL25 RAB21_HUMAN Ras-related protein Rab-21 OS=Homo sapiens GN=RAB21 PE=1 SV=3                          | 2 16 557.27 1112.53 1112.53 0 0 94 3.00E-08        | M.AAAGGGGGGAAAAGR.A  | 12.97       | 20                  | 1                    |  |  |
| beads (3 hours), [ST9]                             | Q9UL25             | 4%          | 55        | 1                   | 24731       | 8.1     | Q9UL25 RAB21_HUMAN Ras-related protein Rab-21 OS=Homo sapiens GN=RAB21 PE=1 SV=3                          | 180 189 604.27 1206.52 1206.56 -0.03 0 55 2.40E-04 | R.MIETAQVDER.A       | 14.57       | 23                  | 1                    |  |  |
| Experiment [Suppl. Table #] BCG (3 hours), [ST4]   | accession # Q04837 | coverage 5% | score 101 | distinct peptides 1 | mass 17249  | pI 9.6  | Q04837 SSB_HUMAN Single-stranded DNA-binding protein, mitochondrial OS=Homo sapiens GN=SSBP1 PE=1 SV=1    | 39 46 442.2 882.39 882.49 -0.11 0 49 7.80E-04      | R.VGDDPVL.R.Q        | 15.35       | Strongest gel slice | # gel slices found 1 |  |  |
| BCG (3 days, b), [ST7]                             | Q04837             | 5%          | 38        | 1                   | 17249       | 9.6     | Q04837 SSB_HUMAN Single-stranded DNA-binding protein, mitochondrial OS=Homo sapiens GN=SSBP1 PE=1 SV=1    | 39 46 442.22 882.42 882.49 -0.08 0 38 9.90E-03     | R.VGDDPVL.R.Q        | 13.76       | 37                  | 1                    |  |  |
| beads (3 hours), [ST9]                             | Q04837             | 5%          | 45        | 1                   | 17249       | 9.6     | Q04837 SSB_HUMAN Single-stranded DNA-binding protein, mitochondrial OS=Homo sapiens GN=SSBP1 PE=1 SV=1    | 39 46 442.2 882.38 882.49 -0.11 0 45 1.90E-03      | R.VGDDPVL.R.Q        | 15.26       | 31                  | 1                    |  |  |
| Experiment [Suppl. Table #] BCG (3 days, a), [ST6] | accession # Q8TED4 | coverage 2% | score 38  | distinct peptides 1 | mass 55256  | pI 6.4  | Q8TED4 SPX2_HUMAN Sugar phosphate exchanger 2 OS=Homo sapiens GN=SLC37A2 PE=2 SV=2                        | 266 274 467.28 932.54 932.48 0.06 0 38 1.20E-02    | R.ESGLETVAK.C        | 20.15       | Strongest gel slice | # gel slices found 1 |  |  |
| BCG (3 days, b), [ST7]                             | Q8TED4             | 2%          | 52        | 1                   | 55256       | 6.4     | Q8TED4 SPX2_HUMAN Sugar phosphate exchanger 2 OS=Homo sapiens GN=SLC37A2 PE=2 SV=2                        | 266 274 467.23 932.45 932.48 -0.03 0 52 5.80E-04   | R.ESGLETVAK.C        | 13.7        | 1                   | 1                    |  |  |
| beads (3 hours), [ST9]                             | Q8TED4             | 2%          | 60        | 1                   | 55256       | 6.4     | Q8TED4 SPX2_HUMAN Sugar phosphate exchanger 2 OS=Homo sapiens GN=SLC37A2 PE=2 SV=2                        | 266 274 467.24 932.47 932.48 -0.01 0 60 9.60E-05   | R.ESGLETVAK.C        | 14.26       | 1                   | 2                    |  |  |
| Experiment [Suppl. Table #] BCG (3 days, a), [ST6] | accession # Q9H3N1 | coverage 4% | score 64  | distinct peptides 1 | mass 32170  | pI 4.9  | Q9H3N1 TXND1_HUMAN Thioredoxin domain-containing protein 1 OS=Homo sapiens GN=TXNDC1 PE=1 SV=1            | 83 94 629.35 1256.69 1256.64 0.06 0 64 3.10E-05    | K.VDVTEQPGLSGR.F     | 24.73       | Strongest gel slice | # gel slices found 3 |  |  |
| BCG (5 days), [ST8]                                | Q9H3N1             | 4%          | 54        | 1                   | 32170       | 4.9     | Q9H3N1 TXND1_HUMAN Thioredoxin domain-containing protein 1 OS=Homo sapiens GN=TXNDC1 PE=1 SV=1            | 83 94 629.32 1256.63 1256.64 -0.01 0 54 3.20E-04   | K.VDVTEQPGLSGR.F     | 15.82       | 17                  | 1                    |  |  |
| beads (3 days), [ST10]                             | Q9H3N1             | 4%          | 47        | 1                   | 32170       | 4.9     | Q9H3N1 TXND1_HUMAN Thioredoxin domain-containing protein 1 OS=Homo sapiens GN=TXNDC1 PE=1 SV=1            | 83 94 629.36 1256.7 1256.64 0.07 0 47 1.70E-03     | K.VDVTEQPGLSGR.F     | 23.21       | 29                  | 1                    |  |  |
| Experiment [Suppl. Table #] BCG (1 day), [ST5]     | accession # P29144 | coverage 1% | score 45  | distinct peptides 1 | mass 139745 | pI 5.9  | P29144 TRPP2_HUMAN Tripeptidyl-peptidase 2 OS=Homo sapiens GN=TRPP2 PE=1 SV=4                             | 629 638 491.74 981.46 981.62 -0.16 0 35 2.00E-02   | R.VPITAVIAAK.V       | 19.39       | Strongest gel slice | # gel slices found 1 |  |  |
| beads (5 days), [ST11]                             | P29144             | 1%          | 38        | 1                   | 139745      | 5.9     | P29144 TRPP2_HUMAN Tripeptidyl-peptidase 2 OS=Homo sapiens GN=TRPP2 PE=1 SV=4                             | 629 638 491.8 981.59 981.62 -0.03 0 38 1.00E-02    | R.VPITAVIAAK.V       | 20.3        | 2                   | 1                    |  |  |
| Experiment [Suppl. Table #] BCG (3 days, b), [ST7] | accession # P23381 | coverage 4% | score 120 | distinct peptides 1 | mass 53474  | pI 5.8  | P23381 SYWC_HUMAN Tryptophanyl-tRNA synthetase, cytoplasmic OS=Homo sapiens GN=WARS PE=1 SV=2             | 350 366 900.91 1799.8 1799.82 -0.02 0 99 8.50E-09  | K.MSADPNNSIFLTDTAQ.Q | 20.11       | Strongest gel slice | # gel slices found 1 |  |  |
| BCG (5 days), [ST8]                                | P23381             | 4%          | 92        | 1                   | 53474       | 5.8     | P23381 SYWC_HUMAN Tryptophanyl-tRNA synthetase, cytoplasmic OS=Homo sapiens GN=WARS PE=1 SV=2             | 350 366 900.89 1799.77 1799.82 -0.06 0 77 1.40E-06 | K.MSADPNNSIFLTDTAQ.Q | 20.48       | 10                  | 1                    |  |  |
| beads (5 days), [ST11]                             | P23381             | 4%          | 87        | 1                   | 53474       | 5.8     | P23381 SYWC_HUMAN Tryptophanyl-tRNA synthetase, cytoplasmic OS=Homo sapiens GN=WARS PE=1 SV=2             | 350 366 900.91 1799.8 1799.82 -0.02 0 76 1.40E-06  | K.MSADPNNSIFLTDTAQ.Q | 20.4        | 10                  | 1                    |  |  |
| Experiment [Suppl. Table #] BCG (3 days, a), [ST6] | accession # Q9BV40 | coverage 9% | score 56  | distinct peptides 1 | mass 11488  | pI 6.7  | Q9BV40 VAMP8_HUMAN Vesicle-associated membrane protein 8 OS=Homo sapiens GN=VAMP8 PE=1 SV=1               | 25 33 560.79 1119.57 1119.53 0.03 0 35 2.50E-02    | K.NIMTQNVVER.I       | 17.55       | Strongest gel slice | # gel slices found 1 |  |  |
| Experiment [Suppl. Table #] BCG (3 days, a), [ST6] | accession # P21796 | coverage 4% | score 73  | distinct peptides 1 | mass 30868  | pI 8.6  | P21796 VDAC1_HUMAN Voltage-dependent anion-selective channel protein 1 OS=Homo sapiens GN=VDAC1 PE=1 SV=2 | 164 174 607.35 1212.68 1212.61 0.07 0 73 3.75E-06  | R.VTQSFAVGYK.T       | 27.57       | Strongest gel slice | # gel slices found 3 |  |  |
| Experiment [Suppl. Table #] BCG (3 hours), [ST4]   | accession # Q9Y277 | coverage 4% | score 70  | distinct peptides 1 | mass 30981  | pI 8.8  | Q9Y277 VDAC3_HUMAN Voltage-dependent anion-selective channel protein 3 OS=Homo sapiens GN=VDAC3 PE=1 SV=1 | 164 174 627.84 1253.67 1253.64 0.03 0 70 7.20E-06  | K.LSQNNFALGYK.A      | 20.28       | Strongest gel slice | # gel slices found 1 |  |  |
| BCG (3 days, b), [ST7]                             | Q9Y277             | 4%          | 62        | 1                   | 30981       | 8.8     | Q9Y277 VDAC3_HUMAN Voltage-dependent anion-selective channel protein 3 OS=Homo sapiens GN=VDAC3 PE=1 SV=1 | 164 174 627.82 1253.63 1253.64 -0.01 0 46 1.80E-03 | K.LSQNNFALGYK.A      | 19.6        | 21                  | 2                    |  |  |
| beads (5 days), [ST11]                             | Q9Y277             | 4%          | 56        | 1                   | 30981       | 8.8     | Q9Y277 VDAC3_HUMAN Voltage-dependent anion-selective channel protein 3 OS=Homo sapiens GN=VDAC3 PE=1 SV=1 | 164 174 627.79 1253.57 1253.64 -0.07 0 56 1.80E-04 | K.LSQNNFALGYK.A      | 20.8        | 19                  | 1                    |  |  |
| Experiment [Suppl. Table #] BCG (3 days, a), [ST6] | accession # P30050 | coverage 5% | score 110 | distinct peptides 1 | mass 17979  | pI 9.5  | P30050 RL12_HUMAN 60S ribosomal protein L12 OS=Homo sapiens GN=RPL12 PE=1 SV=1                            | 32 40 441.3 880.59 880.54 0.05 0 34 2.00E-02       | K.IGIPGLSPK.K        | 26.49       | Strongest gel slice | # gel slices found 1 |  |  |
| BCG (3 days, b), [ST7]                             | P30050             | 5%          | 44        | 1                   | 17979       | 9.5     | P30050 RL12_HUMAN 60S ribosomal protein L12 OS=Homo sapiens GN=RPL12 PE=1 SV=1                            | 32 40 441.25 880.48 880.54 -0.06 0 44 2.40E-03     | K.IGIPGLSPK.K        | 19.79       | 35                  | 2                    |  |  |
| Experiment [Suppl. Table #] BCG (1 day), [ST5]     | accession # P61313 | coverage 4% | score 44  | distinct peptides 1 | mass 24245  | pI 11.6 | P61313 RL15_HUMAN 60S ribosomal protein L15 OS=Homo sapiens GN=RPL15 PE=1 SV=2                            |                                                    |                      | retent time | Strongest gel slice | # gel slices found 1 |  |  |

|                                                    |                    |              |          |                     |             |        |                    |     |     |        |         |         |       |   |     |          |                     |       |    |   |
|----------------------------------------------------|--------------------|--------------|----------|---------------------|-------------|--------|--------------------|-----|-----|--------|---------|---------|-------|---|-----|----------|---------------------|-------|----|---|
| BCG (5 days), [ST8]                                | P61313             | 4%           | 47       | 1                   | 24245       | 11.6   | P61313 RL15_HUMAN  | 97  | 105 | 509.67 | 1017.32 | 1017.51 | -0.19 | 0 | 44  | 3.10E-03 | R.SLQSWAEEER.A      | 13.73 | 21 | 1 |
| Experiment [Suppl. Table #] BCG (1 day), [ST5]     | accession # P46776 | coverage 7%  | score 44 | distinct peptides 1 | mass 16665  | pl 11  | P46776 RL27A_HUMAN | 95  | 105 | 556.23 | 1110.45 | 1110.64 | -0.19 | 0 | 44  | 2.50E-03 | K.TGAAPIDVVR.S      | 15.24 |    |   |
| BCG (5 days), [ST8]                                | P46776             | 7%           | 56       | 1                   | 16665       | 11     | P46776 RL27A_HUMAN | 95  | 105 | 556.33 | 1110.64 | 1110.64 | 0     | 0 | 57  | 1.50E-04 | K.TGAAPIDVVR.S      | 19.54 | 26 | 1 |
| Experiment [Suppl. Table #] BCG (3 days, a), [ST6] | accession # P05141 | coverage 3%  | score 66 | distinct peptides 1 | mass 33102  | pl 9.8 | P05141 ADT2_HUMAN  | 2   | 10  | 476.28 | 950.54  | 950.47  | 0.07  | 0 | 47  | 1.30E-03 | M.TDAAVSAFK.D       | 20.73 |    |   |
| Experiment [Suppl. Table #] BCG (3 days, a), [ST6] | accession # P05090 | coverage 6%  | score 85 | distinct peptides 1 | mass 21547  | pl 5.1 | P05090 APOD_HUMAN  | 177 | 187 | 654.84 | 1307.67 | 1307.58 | 0.09  | 0 | 55  | 2.40E-04 | K.MVTDQVNCPK.L      | 29.95 | 21 | 1 |
| Experiment [Suppl. Table #] BCG (3 days, a), [ST6] | accession # Q9Y2J2 | coverage 1%  | score 85 | distinct peptides 1 | mass 121458 | pl 5.1 | Q9Y2J2 E41L3_HUMAN | 912 | 924 | 687.9  | 1373.79 | 1373.68 | 0.11  | 0 | 75  | 2.10E-06 | K.AVLQEETAAASR.E    | 18.63 | 26 | 2 |
| BCG (3 days, b), [ST7]                             | Q9Y2J2             | 1%           | 75       | 1                   | 121458      | 5.1    | Q9Y2J2 E41L3_HUMAN | 912 | 924 | 687.84 | 1373.66 | 1373.68 | -0.02 | 0 | 75  | 2.10E-06 | K.AVLQEETAAASR.E    | 24.22 | 4  | 1 |
| Experiment [Suppl. Table #] BCG (3 days, a), [ST6] | accession # P61769 | coverage 8%  | score 61 | distinct peptides 1 | mass 13820  | pl 6.1 | P61769 B2MG_HUMAN  | 102 | 111 | 374.89 | 1121.66 | 1121.62 | 0.04  | 0 | 39  | 9.50E-03 | R.VNVHTLSQPK.I      | 14.92 | 5  | 1 |
| BCG (3 days, b), [ST7]                             | P61769             | 8%           | 62       | 1                   | 13820       | 6.1    | P61769 B2MG_HUMAN  | 102 | 111 | 374.85 | 1121.53 | 1121.62 | -0.09 | 0 | 39  | 8.60E-03 | R.VNVHTLSQPK.I      | 17.77 | 36 | 1 |
| Experiment [Suppl. Table #] BCG (3 days, a), [ST6] | accession # Q10589 | coverage 6%  | score 45 | distinct peptides 1 | mass 20041  | pl 5.4 | Q10589 BST2_HUMAN  | 127 | 136 | 559.32 | 1116.63 | 1116.54 | 0.09  | 0 | 39  | 1.20E-02 | K.LQDASAEEV.L       | 12.55 | 46 | 3 |
| BCG (5 days), [ST8]                                | Q10589             | 6%           | 49       | 1                   | 20041       | 5.4    | Q10589 BST2_HUMAN  | 127 | 136 | 559.26 | 1116.51 | 1116.54 | -0.03 | 0 | 49  | 1.10E-03 | K.LQDASAEEV.L       | 17.77 | 36 | 1 |
| Experiment [Suppl. Table #] BCG (3 hours), [ST4]   | accession # P10606 | coverage 5%  | score 70 | distinct peptides 1 | mass 13915  | pl 9.1 | P10606 COX5B_HUMAN | 50  | 56  | 396.17 | 790.33  | 790.43  | -0.1  | 0 | 40  | 9.40E-03 | R.EIMLAAK.K         | 12.55 | 46 | 3 |
| BCG (3 days, a), [ST6]                             | P10606             | 5%           | 67       | 1                   | 13915       | 9.1    | P10606 COX5B_HUMAN | 50  | 56  | 396.23 | 790.45  | 790.43  | 0.02  | 0 | 39  | 1.00E-02 | R.EIMLAAK.K         | 12.55 | 46 | 3 |
| Experiment [Suppl. Table #] BCG (3 days, b), [ST7] | accession # P28838 | coverage 3%  | score 78 | distinct peptides 1 | mass 56530  | pl 8   | P28838 AMPL_HUMAN  | 268 | 282 | 763.39 | 1524.76 | 1524.79 | -0.04 | 0 | 52  | 4.70E-04 | K.GSPNANEPLVFGV.G   | 20.51 | 12 | 1 |
| BCG (5 days), [ST8]                                | P28838             | 3%           | 66       | 1                   | 56530       | 8      | P28838 AMPL_HUMAN  | 268 | 282 | 763.38 | 1524.75 | 1524.79 | -0.05 | 0 | 49  | 8.70E-04 | K.GSPNANEPLVFGV.G   | 20.51 | 12 | 1 |
| Experiment [Suppl. Table #] BCG (3 days, a), [ST6] | accession # Q9UHL4 | coverage 2%  | score 84 | distinct peptides 1 | mass 54749  | pl 5.9 | Q9UHL4 DPP2_HUMAN  | 113 | 123 | 596.34 | 1190.67 | 1190.6  | 0.07  | 0 | 36  | 1.80E-02 | K.SLPFGAQSTQR.G     | 20.79 | 10 | 1 |
| BCG (3 days, b), [ST7]                             | Q9UHL4             | 3%           | 94       | 1                   | 54749       | 5.9    | Q9UHL4 DPP2_HUMAN  | 449 | 462 | 488.88 | 1463.63 | 1463.7  | -0.07 | 0 | 52  | 3.70E-04 | R.ASHPEDPASVVEAR.K  | 20.79 | 10 | 1 |
| Experiment [Suppl. Table #] BCG (3 days, b), [ST7] | accession # Q96C19 | coverage 5%  | score 66 | distinct peptides 1 | mass 26794  | pl 5.2 | Q96C19 EFHD2_HUMAN | 177 | 188 | 631.83 | 1261.64 | 1261.64 | 0     | 0 | 55  | 2.20E-04 | R.LSEIDVSSGVK.G     | 14.83 | 12 | 2 |
| BCG (5 days), [ST8]                                | Q96C19             | 5%           | 63       | 1                   | 26794       | 5.2    | Q96C19 EFHD2_HUMAN | 177 | 188 | 631.8  | 1261.58 | 1261.64 | -0.06 | 0 | 63  | 3.60E-05 | R.LSEIDVSSGVK.G     | 28.32 | 12 | 2 |
| Experiment [Suppl. Table #] BCG (3 days, b), [ST7] | accession # Q96HE7 | coverage 3%  | score 38 | distinct peptides 1 | mass 55213  | pl 5.5 | Q96HE7 ERO1A_HUMAN | 137 | 150 | 753.37 | 1504.73 | 1504.73 | 0.01  | 0 | 38  | 1.10E-02 | R.LGAVDESLSSEETQK.A | 14.83 | 12 | 2 |
| BCG (5 days), [ST8]                                | Q96HE7             | 3%           | 119      | 1                   | 55213       | 5.5    | Q96HE7 ERO1A_HUMAN | 137 | 150 | 753.34 | 1504.67 | 1504.73 | -0.05 | 0 | 119 | 7.90E-11 | R.LGAVDESLSSEETQK.A | 14.83 | 12 | 2 |
| Experiment [Suppl. Table #] BCG (3 hours), [ST4]   | accession # P07954 | coverage 2%  | score 53 | distinct peptides 1 | mass 54773  | pl 8.8 | P07954 FUMH_HUMAN  | 161 | 172 | 610.83 | 1219.64 | 1219.61 | 0.03  | 0 | 53  | 3.90E-04 | R.AIEMGLGELGSK.I    | 19.12 | 17 | 1 |
| BCG (5 days), [ST8]                                | P07954             | 2%           | 142      | 1                   | 54773       | 8.8    | P07954 FUMH_HUMAN  | 161 | 172 | 610.79 | 1219.57 | 1219.61 | -0.04 | 0 | 72  | 5.00E-06 | R.AIEMGLGELGSK.I    | 19.12 | 17 | 1 |
| Experiment [Suppl. Table #] BCG (3 hours), [ST4]   | accession # P63218 | coverage 16% | score 96 | distinct peptides 1 | mass 7428   | pl 9.9 | P63218 GBG5_HUMAN  | 2   | 12  | 555.7  | 1109.39 | 1109.54 | -0.15 | 1 | 49  | 7.50E-04 | M.SGSSVAAMKK.V      | 14.83 | 12 | 2 |
| Experiment [Suppl. Table #] BCG (3 hours), [ST4]   | accession # Q9H4G4 | coverage 8%  | score 48 | distinct peptides 1 | mass 17322  | pl 9.4 | Q9H4G4 GAPR1_HUMAN | 120 | 132 | 627.28 | 1252.54 | 1252.6  | -0.06 | 0 | 48  | 1.20E-03 | K.ASASDGSFVVAR.Y    | 19.12 | 17 | 1 |
| BCG (3 days, b), [ST7]                             | Q9H4G4             | 8%           | 98       | 1                   | 17322       | 9.4    | Q9H4G4 GAPR1_HUMAN | 120 | 132 | 627.3  | 1252.59 | 1252.6  | -0.01 | 0 | 98  | 1.00E-08 | K.ASASDGSFVVAR.Y    | 19.12 | 17 | 1 |
| Experiment [Suppl. Table #] BCG (3 hours), [ST4]   | accession # P08648 | coverage 1%  | score 43 | distinct peptides 1 | mass 115605 | pl 5.5 | P08648 ITAS5_HUMAN | 695 | 708 | 744.92 | 1487.82 | 1487.76 | 0.06  | 0 | 43  | 3.50E-03 | R.VTAPPEAEYSGLVR.H  | 14.83 | 12 | 2 |
| BCG (3 days, a), [ST6]                             | P08648             | 1%           | 58       | 1                   | 115605      | 5.5    | P08648 ITAS5_HUMAN | 728 | 738 | 638.43 | 1274.84 | 1274.64 | 0.21  | 0 | 39  | 9.30E-03 | R.LLVCDLGNPMK.A     | 20.48 | 13 | 1 |
| Experiment [Suppl. Table #] BCG (1 day), [ST5]     | accession # P05362 | coverage 2%  | score 53 | distinct peptides 1 | mass 58587  | pl 8.3 | P05362 ICAM1_HUMAN |     |     |        |         |         |       |   |     |          |                     | 27.99 | 3  | 2 |

|                                                       |                       |                 |              |                        |                |           |                                |                                                              |     |     |        |         |         |       |   |    |          |                  |       |    |   |
|-------------------------------------------------------|-----------------------|-----------------|--------------|------------------------|----------------|-----------|--------------------------------|--------------------------------------------------------------|-----|-----|--------|---------|---------|-------|---|----|----------|------------------|-------|----|---|
| BCG (5 days), [ST8]                                   | P05362                | 2%              | 39           | 1                      | 58587          | 8.3       | P05362 ICAM1_HUMAN             | Interleukin 1 receptor 1                                     | 135 | 143 | 487.15 | 972.28  | 972.44  | -0.17 | 0 | 38 | 6.20E-03 | R.CQVEGGAPR.A    | 12.12 | 5  | 1 |
|                                                       |                       |                 |              |                        |                |           |                                |                                                              | 135 | 143 | 487.2  | 972.38  | 972.44  | -0.06 | 0 | 34 | 3.70E-02 | R.CQVEGGAPR.A    | 12.64 |    |   |
| Experiment [Suppl. Table #]<br>BCG (3 hours), [ST4]   | accession #<br>O95202 | coverage<br>2%  | score<br>74  | distinct peptides<br>1 | mass<br>83986  | pl<br>6.3 | start AA<br>O95202 LETM1_HUMAN | LETM1 and EF-hand domain-containing protein 1, mitochondrial | 452 | 463 | 658.8  | 1315.59 | 1315.63 | -0.04 | 0 | 56 | 2.00E-04 | K.VAEVEGEQVDNKA  | 13.95 | 7  | 1 |
|                                                       |                       |                 |              |                        |                |           |                                |                                                              | 452 | 463 | 658.85 | 1315.68 | 1315.63 | 0.06  | 0 | 62 | 5.60E-05 | K.VAEVEGEQVDNKA  | 19.23 |    |   |
| Experiment [Suppl. Table #]<br>BCG (3 days, b), [ST7] | accession #<br>P36776 | coverage<br>1%  | score<br>48  | distinct peptides<br>1 | mass<br>106936 | pl<br>6   | start AA<br>P36776 LONN_HUMAN  | Lon protease homolog, mitochondrial                          | 473 | 482 | 597.78 | 1193.54 | 1193.57 | -0.03 | 0 | 59 | 1.20E-03 | K.YSNENLDLAR.A   | 18.2  | 6  | 1 |
|                                                       |                       |                 |              |                        |                |           |                                |                                                              | 473 | 482 | 597.76 | 1193.5  | 1193.57 | -0.06 | 0 | 50 | 7.60E-04 | K.YSNENLDLAR.A   | 18.48 | 5  | 1 |
| Experiment [Suppl. Table #]<br>BCG (1 day), [ST5]     | accession #<br>P11117 | coverage<br>2%  | score<br>38  | distinct peptides<br>1 | mass<br>48713  | pl<br>6.3 | start AA<br>P11117 PPAL_HUMAN  | Lysosomal acid phosphatase                                   | 357 | 364 | 441.69 | 881.36  | 881.52  | -0.16 | 0 | 38 | 9.50E-03 | R.LTEPVVPK.D     | 14.34 | 24 | 1 |
|                                                       |                       |                 |              |                        |                |           |                                |                                                              | 35  | 41  | 456.24 | 910.47  | 910.53  | -0.05 | 0 | 42 | 4.20E-03 | R.FVTLLYR.H      | 20.64 | 9  | 2 |
| Experiment [Suppl. Table #]<br>BCG (3 days, b), [ST7] | accession #<br>P10253 | coverage<br>1%  | score<br>80  | distinct peptides<br>1 | mass<br>106126 | pl<br>5.6 | start AA<br>P10253 LYAG_HUMAN  | Lysosomal alpha-glucosidase                                  | 892 | 903 | 615.81 | 1229.6  | 1229.66 | -0.07 | 0 | 80 | 8.10E-07 | R.VTSEGAGLQLQK.V | 15.38 | 35 | 2 |
|                                                       |                       |                 |              |                        |                |           |                                |                                                              | 892 | 903 | 615.82 | 1229.63 | 1229.66 | -0.04 | 0 | 50 | 7.30E-04 | R.VTSEGAGLQLQK.V | 15.9  | 4  | 2 |
| Experiment [Suppl. Table #]<br>BCG (3 days, b), [ST7] | accession #<br>Q8TCT9 | coverage<br>3%  | score<br>65  | distinct peptides<br>1 | mass<br>41747  | pl<br>6   | start AA<br>Q8TCT9 HM13_HUMAN  | Minor histocompatibility antigen H13                         | 62  | 73  | 669.29 | 1336.56 | 1336.59 | -0.04 | 0 | 44 | 2.60E-03 | K.NASDMPETITSR.D | 13.52 | 1  | 1 |
|                                                       |                       |                 |              |                        |                |           |                                |                                                              | 62  | 73  | 669.29 | 1336.56 | 1336.59 | -0.03 | 0 | 68 | 1.10E-05 | K.NASDMPETITSR.D | 13.68 | 1  | 1 |
| Experiment [Suppl. Table #]<br>BCG (3 hours), [ST4]   | accession #<br>Q9NS69 | coverage<br>8%  | score<br>56  | distinct peptides<br>1 | mass<br>15512  | pl<br>4.3 | start AA<br>Q9NS69 TOM22_HUMAN | Mitochondrial import receptor subunit TOM22 homolog          | 106 | 117 | 787.33 | 1572.64 | 1572.77 | -0.12 | 0 | 56 | 1.70E-04 | K.LQMEQQQLQQR.Q  | 14.09 | 25 | 1 |
|                                                       |                       |                 |              |                        |                |           |                                |                                                              | 106 | 117 | 787.4  | 1572.79 | 1572.77 | 0.03  | 0 | 84 | 2.80E-07 | K.LQMEQQQLQQR.Q  | 17.91 | 31 | 2 |
| Experiment [Suppl. Table #]<br>BCG (3 hours), [ST4]   | accession #<br>Q16891 | coverage<br>1%  | score<br>87  | distinct peptides<br>1 | mass<br>84026  | pl<br>6.1 | start AA<br>Q16891 IMMT_HUMAN  | Mitochondrial inner membrane protein                         | 507 | 516 | 605.79 | 1209.56 | 1209.55 | 0.01  | 0 | 35 | 2.40E-02 | K.SFEFQNLSEK.L   | 16.95 | 4  | 1 |
| Experiment [Suppl. Table #]<br>BCG (1 day), [ST5]     | accession #<br>P15586 | coverage<br>2%  | score<br>92  | distinct peptides<br>1 | mass<br>62840  | pl<br>8.6 | start AA<br>P15586 GNS_HUMAN   | N-acetylglucosamine-6-sulfatase                              | 247 | 255 | 525.19 | 1048.36 | 1048.55 | -0.18 | 0 | 33 | 3.60E-02 | K.AFQNVFAPR.N    | 19.79 | 22 | 1 |
|                                                       |                       |                 |              |                        |                |           |                                |                                                              | 247 | 255 | 525.34 | 1048.66 | 1048.55 | 0.11  | 0 | 37 | 1.40E-02 | K.AFQNVFAPR.N    | 29.59 | 7  | 1 |
| Experiment [Suppl. Table #]<br>BCG (1 day), [ST5]     | accession #<br>P07602 | coverage<br>2%  | score<br>152 | distinct peptides<br>1 | mass<br>59899  | pl<br>5.1 | start AA<br>P07602 SAP_HUMAN   | Proactivator polypeptide                                     | 430 | 438 | 507.71 | 1013.41 | 1013.58 | -0.16 | 0 | 83 | 3.80E-07 | K.QEILAALEK.G    | 19.63 | 43 | 1 |
|                                                       |                       |                 |              |                        |                |           |                                |                                                              | 233 | 242 | 539.24 | 1076.47 | 1076.5  | -0.03 | 0 | 38 | 1.30E-02 | R.LPGMADICK.N    | 14.96 | 8  | 1 |
| Experiment [Suppl. Table #]<br>BCG (3 days, b), [ST7] | accession #<br>Q6P4E1 | coverage<br>3%  | score<br>49  | distinct peptides<br>1 | mass<br>48949  | pl<br>5.5 | start AA<br>Q6P4E1 CASC4_HUMAN | Protein CASC4                                                | 324 | 335 | 649.31 | 1296.61 | 1296.67 | -0.05 | 0 | 51 | 5.70E-04 | R.LIPGSNLDSEPR.I | 19.02 | 9  | 1 |
|                                                       |                       |                 |              |                        |                |           |                                |                                                              | 324 | 335 | 649.33 | 1296.64 | 1296.67 | -0.03 | 0 | 47 | 1.40E-03 | R.LIPGSNLDSEPR.I | 19.3  | 8  | 1 |
| Experiment [Suppl. Table #]<br>BCG (1 day), [ST5]     | accession #<br>Q99497 | coverage<br>4%  | score<br>55  | distinct peptides<br>1 | mass<br>20050  | pl<br>6.3 | start AA<br>Q99497 PARK7_HUMAN | Protein DJ-1                                                 | 183 | 189 | 378.17 | 754.33  | 754.46  | -0.13 | 1 | 37 | 1.10E-02 | K.APLVLKD.-      | 14.77 | 37 | 1 |
|                                                       |                       |                 |              |                        |                |           |                                |                                                              | 183 | 189 | 378.22 | 754.44  | 754.46  | -0.02 | 1 | 39 | 6.10E-03 | K.APLVLKD.-      | 16.12 | 27 | 1 |
| Experiment [Suppl. Table #]<br>BCG (3 days, a), [ST6] | accession #<br>P60059 | coverage<br>18% | score<br>51  | distinct peptides<br>1 | mass<br>7793   | pl<br>10  | start AA<br>P60059 SC61G_HUMAN | Protein transport protein Sec61 subunit gamma                | 1   | 12  | 770.87 | 1539.73 | 1539.67 | 0.06  | 0 | 51 | 5.60E-04 | -MDQVMQFVPSR.Q   | 27.13 | 36 | 1 |
|                                                       |                       |                 |              |                        |                |           |                                |                                                              | 1   | 12  | 770.79 | 1539.57 | 1539.67 | -0.1  | 0 | 63 | 3.50E-05 | -MDQVMQFVPSR.Q   | 20.21 | 47 | 2 |
| Experiment [Suppl. Table #]<br>BCG (3 days, b), [ST7] | accession #<br>P15498 | coverage<br>1%  | score<br>54  | distinct peptides<br>1 | mass<br>99677  | pl<br>6.2 | start AA<br>P15498 VAV_HUMAN   | Proto-oncogene vav                                           | 679 | 688 | 501.25 | 1000.49 | 1000.53 | -0.04 | 0 | 54 | 3.40E-04 | R.AGAESILANR.S   | 17.81 | 6  | 1 |
|                                                       |                       |                 |              |                        |                |           |                                |                                                              | 679 | 688 | 501.26 | 1000.5  | 1000.53 | -0.03 | 0 | 47 | 1.70E-03 | R.AGAESILANR.S   | 18.26 | 5  | 1 |
| Experiment [Suppl. Table #]<br>BCG (1 day), [ST5]     | accession #<br>P61106 | coverage<br>4%  | score<br>79  | distinct peptides<br>1 | mass<br>24110  | pl<br>5.8 | start AA<br>P61106 RAB14_HUMAN | Ras-related protein Rab-14                                   | 52  | 59  | 437.18 | 872.35  | 872.5   | -0.15 | 0 | 35 | 3.60E-02 | R.IIEVSGQK.I     | 12.96 | 37 | 1 |
|                                                       |                       |                 |              |                        |                |           |                                |                                                              | 52  | 59  | 437.29 | 872.56  | 872.5   | 0.07  | 0 | 40 | 1.10E-02 | R.IIEVSGQK.I     | 19.12 | 26 | 1 |
| Experiment [Suppl. Table #]<br>BCG (3 days, a), [ST6] | accession #<br>P52566 | coverage<br>6%  | score<br>60  | distinct peptides<br>1 | mass<br>23031  | pl<br>5.1 | start AA<br>P52566 GDIR2_HUMAN | Rho GDP-dissociation inhibitor 2                             | 51  | 63  | 656.39 | 1310.77 | 1310.71 | 0.06  | 0 | 36 | 1.90E-02 | K.TLLGDGPVVDPK.A | 26.71 | 25 | 1 |
|                                                       |                       |                 |              |                        |                |           |                                |                                                              | 51  | 63  | 656.39 | 1310.77 | 1310.71 | 0.06  | 0 | 36 | 1.90E-02 | K.TLLGDGPVVDPK.A | 26.71 | 26 | 1 |

| Experiment [Suppl. Table #] | accession # | coverage    | score      | distinct peptides | mass  | pl  | start AA | end AA      | m/z obs                                                                       | M obs           | M calc       | delta | miss | pept score | exp val | peptide | modifications | retent time | Strongest gel slice | # gel slices found |
|-----------------------------|-------------|-------------|------------|-------------------|-------|-----|----------|-------------|-------------------------------------------------------------------------------|-----------------|--------------|-------|------|------------|---------|---------|---------------|-------------|---------------------|--------------------|
| BCG (1 day), [ST5]          | Q9H299      | 11%         | 67         | 1                 | 10488 | 4.8 | Q9H299   | SH3L3_HUMAN | SH3 domain-binding glutamic acid-rich-like protein 3                          | OS=Homo sapiens | GN=SH3BGR3L3 | PE=1  | SV=1 |            |         |         |               |             |                     |                    |
| BCG (3 days, b), [ST7]      | Q9H299      | 11%         | 53         | 1                 | 10488 | 4.8 | Q9H299   | SH3L3_HUMAN | SH3 domain-binding glutamic acid-rich-like protein 3                          | OS=Homo sapiens | GN=SH3BGR3L3 | PE=1  | SV=1 |            |         |         |               | 12.64       | 43                  | 2                  |
| Experiment [Suppl. Table #] | accession # | coverage    | score      | distinct peptides | mass  | pl  | start AA | end AA      | m/z obs                                                                       | M obs           | M calc       | delta | miss | pept score | exp val | peptide | modifications | retent time | Strongest gel slice | # gel slices found |
| BCG (1 day), [ST5]          | P16949      | 7%          | 41         | 1                 | 17292 | 5.8 | P16949   | STMN1_HUMAN | Stathmin OS=Homo sapiens                                                      | GN=STMN1        | PE=1         | SV=3  |      |            |         |         |               |             |                     |                    |
| BCG (5 days), [ST8]         | P16949      | 7%          | 50         | 1                 | 17292 | 5.8 | P16949   | STMN1_HUMAN | Stathmin OS=Homo sapiens                                                      | GN=STMN1        | PE=1         | SV=3  |      |            |         |         |               | 12.96       | 26                  | 1                  |
| other possible isoforms     | Q93045      | STMN2_HUMAN | Stathmin-2 |                   |       |     |          |             |                                                                               |                 |              |       |      |            |         |         |               | 13.86       |                     |                    |
| Experiment [Suppl. Table #] | accession # | coverage    | score      | distinct peptides | mass  | pl  | start AA | end AA      | m/z obs                                                                       | M obs           | M calc       | delta | miss | pept score | exp val | peptide | modifications | retent time | Strongest gel slice | # gel slices found |
| BCG (3 hours), [ST4]        | Q13277      | 3%          | 45         | 1                 | 33134 | 5.3 | Q13277   | STX3_HUMAN  | Syntaxin-3 OS=Homo sapiens                                                    | GN=STX3         | PE=1         | SV=3  |      |            |         |         |               |             |                     |                    |
| BCG (5 days), [ST8]         | Q13277      | 3%          | 38         | 1                 | 33134 | 5.3 | Q13277   | STX3_HUMAN  | Syntaxin-3 OS=Homo sapiens                                                    | GN=STX3         | PE=1         | SV=3  |      |            |         |         |               | 17.02       | 14                  | 1                  |
| Experiment [Suppl. Table #] | accession # | coverage    | score      | distinct peptides | mass  | pl  | start AA | end AA      | m/z obs                                                                       | M obs           | M calc       | delta | miss | pept score | exp val | peptide | modifications | retent time | Strongest gel slice | # gel slices found |
| BCG (3 days, b), [ST7]      | P37837      | 3%          | 45         | 1                 | 37688 | 6.4 | P37837   | TALDO_HUMAN | Transaldolase OS=Homo sapiens                                                 | GN=TALDO1       | PE=1         | SV=2  |      |            |         |         |               |             |                     |                    |
| BCG (5 days), [ST8]         | P37837      | 3%          | 55         | 1                 | 37688 | 6.4 | P37837   | TALDO_HUMAN | Transaldolase OS=Homo sapiens                                                 | GN=TALDO1       | PE=1         | SV=2  |      |            |         |         |               | 20.46       | 18                  | 1                  |
| Experiment [Suppl. Table #] | accession # | coverage    | score      | distinct peptides | mass  | pl  | start AA | end AA      | m/z obs                                                                       | M obs           | M calc       | delta | miss | pept score | exp val | peptide | modifications | retent time | Strongest gel slice | # gel slices found |
| BCG (3 days), [ST7]         | Q15582      | 2%          | 146        | 1                 | 75261 | 7.6 | Q15582   | BGH3_HUMAN  | Transforming growth factor-beta-induced protein ig-h3                         | OS=Homo sapiens | GN=TGFBI     | PE=1  | SV=1 |            |         |         |               |             |                     |                    |
| BCG (5 days), [ST8]         | Q15582      | 2%          | 71         | 1                 | 75261 | 7.6 | Q15582   | BGH3_HUMAN  | Transforming growth factor-beta-induced protein ig-h3                         | OS=Homo sapiens | GN=TGFBI     | PE=1  | SV=1 |            |         |         |               | 22.25       | 9                   | 1                  |
| Experiment [Suppl. Table #] | accession # | coverage    | score      | distinct peptides | mass  | pl  | start AA | end AA      | m/z obs                                                                       | M obs           | M calc       | delta | miss | pept score | exp val | peptide | modifications | retent time | Strongest gel slice | # gel slices found |
| BCG (3 days, a), [ST6]      | P51571      | 8%          | 80         | 1                 | 19158 | 5.8 | P51571   | SSRD_HUMAN  | Translocoson-associated protein subunit delta                                 | OS=Homo sapiens | GN=SSR4      | PE=1  | SV=1 |            |         |         |               |             |                     |                    |
| BCG (3 days, b), [ST7]      | P51571      | 8%          | 41         | 1                 | 19158 | 5.8 | P51571   | SSRD_HUMAN  | Translocoson-associated protein subunit delta                                 | OS=Homo sapiens | GN=SSR4      | PE=1  | SV=1 |            |         |         |               | 25.34       | 31                  | 1                  |
| Experiment [Suppl. Table #] | accession # | coverage    | score      | distinct peptides | mass  | pl  | start AA | end AA      | m/z obs                                                                       | M obs           | M calc       | delta | miss | pept score | exp val | peptide | modifications | retent time | Strongest gel slice | # gel slices found |
| BCG (1 day), [ST5]          | O43399      | 7%          | 47         | 1                 | 22281 | 5.3 | O43399   | TPD05_HUMAN | Tumor protein D5 OS=Homo sapiens                                              | GN=TPD5L2       | PE=1         | SV=2  |      |            |         |         |               |             |                     |                    |
| BCG (5 days), [ST8]         | O43399      | 7%          | 73         | 1                 | 22281 | 5.3 | O43399   | TPD05_HUMAN | Tumor protein D5 OS=Homo sapiens                                              | GN=TPD5L2       | PE=1         | SV=2  |      |            |         |         |               | 19.07       | 37                  | 1                  |
| Experiment [Suppl. Table #] | accession # | coverage    | score      | distinct peptides | mass  | pl  | start AA | end AA      | m/z obs                                                                       | M obs           | M calc       | delta | miss | pept score | exp val | peptide | modifications | retent time | Strongest gel slice | # gel slices found |
| BCG (3 days, a), [ST6]      | Q0VGL1      | 10%         | 66         | 1                 | 10792 | 6.1 | Q0VGL1   | CG059_HUMAN | UPF0539 protein C7orf59 OS=Homo sapiens                                       | GN=C7orf59      | PE=3         | SV=1  |      |            |         |         |               |             |                     |                    |
| BCG (3 days, b), [ST7]      | Q0VGL1      | 10%         | 73         | 1                 | 10792 | 6.1 | Q0VGL1   | CG059_HUMAN | UPF0539 protein C7orf59 OS=Homo sapiens                                       | GN=C7orf59      | PE=3         | SV=1  |      |            |         |         |               | 27.48       | 36                  | 1                  |
| Experiment [Suppl. Table #] | accession # | coverage    | score      | distinct peptides | mass  | pl  | start AA | end AA      | m/z obs                                                                       | M obs           | M calc       | delta | miss | pept score | exp val | peptide | modifications | retent time | Strongest gel slice | # gel slices found |
| BCG (1 day), [ST5]          | O95766      | 3%          | 76         | 1                 | 56286 | 6.1 | O95766   | CG028_HUMAN | UPF0550 protein C7orf28 OS=Homo sapiens                                       | GN=C7orf28A     | PE=1         | SV=1  |      |            |         |         |               |             |                     |                    |
| BCG (3 days, b), [ST7]      | O95766      | 3%          | 59         | 1                 | 56286 | 6.1 | O95766   | CG028_HUMAN | UPF0550 protein C7orf28 OS=Homo sapiens                                       | GN=C7orf28A     | PE=1         | SV=1  |      |            |         |         |               | 20.4        | 27                  | 1                  |
| Experiment [Suppl. Table #] | accession # | coverage    | score      | distinct peptides | mass  | pl  | start AA | end AA      | m/z obs                                                                       | M obs           | M calc       | delta | miss | pept score | exp val | peptide | modifications | retent time | Strongest gel slice | # gel slices found |
| BCG (3 days, b), [ST7]      | P21283      | 3%          | 124        | 1                 | 44085 | 7   | P21283   | VATC1_HUMAN | Vacuolar proton pump subunit C1 OS=Homo sapiens                               | GN=ATP6V1C1     | PE=1         | SV=4  |      |            |         |         |               |             |                     |                    |
| BCG (5 days), [ST8]         | P21283      | 3%          | 52         | 1                 | 44085 | 7   | P21283   | VATC1_HUMAN | Vacuolar proton pump subunit C1 OS=Homo sapiens                               | GN=ATP6V1C1     | PE=1         | SV=4  |      |            |         |         |               | 17.28       | 13                  | 1                  |
| Experiment [Suppl. Table #] | accession # | coverage    | score      | distinct peptides | mass  | pl  | start AA | end AA      | m/z obs                                                                       | M obs           | M calc       | delta | miss | pept score | exp val | peptide | modifications | retent time | Strongest gel slice | # gel slices found |
| BCG (3 hours), [ST4]        | Q9Y5K8      | 4%          | 52         | 1                 | 28245 | 9.4 | Q9Y5K8   | VATD_HUMAN  | Vacuolar proton pump subunit D OS=Homo sapiens                                | GN=ATP6V1D      | PE=1         | SV=1  |      |            |         |         |               |             |                     |                    |
| BCG (3 days, b), [ST7]      | Q9Y5K8      | 4%          | 62         | 1                 | 28245 | 9.4 | Q9Y5K8   | VATD_HUMAN  | Vacuolar proton pump subunit D OS=Homo sapiens                                | GN=ATP6V1D      | PE=1         | SV=1  |      |            |         |         |               | 20.16       | 15                  | 1                  |
| Experiment [Suppl. Table #] | accession # | coverage    | score      | distinct peptides | mass  | pl  | start AA | end AA      | m/z obs                                                                       | M obs           | M calc       | delta | miss | pept score | exp val | peptide | modifications | retent time | Strongest gel slice | # gel slices found |
| BCG (3 hours), [ST4]        | Q9Y2Q5      | 10%         | 78         | 1                 | 13613 | 5.3 | Q9Y2Q5   | MAPIP_HUMAN | Mitogen-activated protein-binding protein-interacting protein OS=Homo sapiens | GN=MAPPBP       | PE=2         | SV=1  |      |            |         |         |               |             |                     |                    |
| beads (3 hours), [ST9]      | Q9Y2Q5      | 10%         | 74         | 1                 | 13613 | 5.3 | Q9Y2Q5   | MAPIP_HUMAN | Mitogen-activated protein-binding protein-interacting protein OS=Homo sapiens | GN=MAPPBP       | PE=2         | SV=1  |      |            |         |         |               | 17.83       | 31                  | 1                  |
| beads (3 days), [ST10]      | Q9Y2Q5      | 10%         | 92         | 1                 | 13613 | 5.3 | Q9Y2Q5   | MAPIP_HUMAN | Mitogen-activated protein-binding protein-interacting protein OS=Homo sapiens | GN=MAPPBP       | PE=2         | SV=1  |      |            |         |         |               | 18.3        | 34                  | 1                  |
| Experiment [Suppl. Table #] | accession # | coverage    | score      | distinct peptides | mass  | pl  | start AA | end AA      | m/z obs                                                                       | M obs           | M calc       | delta | miss | pept score | exp val | peptide | modifications | retent time | Strongest gel slice | # gel slices found |
| BCG (1 day), [ST5]          | P13667      | 2%          | 108        | 1                 | 73229 | 5   | P13667   | PDIA4_HUMAN | Protein disulfide-isomerase A4 OS=Homo sapiens                                | GN=PDIA4        | PE=1         | SV=2  |      |            |         |         |               |             |                     |                    |
| beads (3 days), [ST10]      | P13667      | 2%          | 61         | 1                 | 73229 | 5   | P13667   | PDIA4_HUMAN | Protein disulfide-isomerase A4 OS=Homo sapiens                                | GN=PDIA4        | PE=1         | SV=2  |      |            |         |         |               | 28.96       | 22                  | 1                  |
| Experiment [Suppl. Table #] | accession # | coverage    | score      | distinct peptides | mass  | pl  | start AA | end AA      | m/z obs                                                                       | M obs           | M calc       | delta | miss | pept score | exp val | peptide | modifications | retent time | Strongest gel slice | # gel slices found |
| BCG (3 days, a), [ST6]      | O43760      | 4%          | 92         | 1                 | 25079 | 4.8 | O43760   | SNHG2_HUMAN | Synaptogyrin-2 OS=Homo sapiens                                                | GN=SYNGR2       | PE=1         | SV=1  |      |            |         |         |               |             |                     |                    |
| beads (3 hours), [ST9]      | O43760      | 4%          | 44         | 1                 | 25079 | 4.8 | O43760   | SNHG2_HUMAN | Synaptogyrin-2 OS=Homo sapiens                                                | GN=SYNGR2       | PE=1         | SV=1  |      |            |         |         |               | 25.84       | 25                  | 1                  |
| beads (3 days), [ST10]      | O43760      | 4%          | 54         | 1                 | 25079 | 4.8 | O43760   | SNHG2_HUMAN | Synaptogyrin-2 OS=Homo sapiens                                                | GN=SYNGR2       | PE=1         | SV=1  |      |            |         |         |               | 20.64       | 30                  | 1                  |

| Experiment [Suppl. Table #] | accession # | coverage | score | distinct peptides | mass   | pl   | start AA           | end AA    | m/z obs | M obs   | M calc  | delta | miss | pept score | exp val  | peptide            | modifications | retent time | Strongest gel slice | # gel slices found |
|-----------------------------|-------------|----------|-------|-------------------|--------|------|--------------------|-----------|---------|---------|---------|-------|------|------------|----------|--------------------|---------------|-------------|---------------------|--------------------|
| BCG (3 days, b), [ST7]      | P39019      | 6%       | 102   | 1                 | 16051  | 10.3 | P39019 RS19_HUMAN  | 103 111   | 485.76  | 969.51  | 969.59  | -0.07 | 0    | 44         | 2.80E-03 | R.VLQALEGLK.M      |               | 20.1        | 37                  | 1                  |
| beads (5 days), [ST11]      | P39019      | 6%       | 100   | 1                 | 16051  | 10.3 | P39019 RS19_HUMAN  | 103 111   | 485.77  | 969.52  | 969.59  | -0.06 | 0    | 49         | 9.30E-04 | R.VLQALEGLK.M      |               | 21.13       | 28                  | 1                  |
| Experiment [Suppl. Table #] | accession # | coverage | score | distinct peptides | mass   | pl   | start AA           | end AA    | m/z obs | M obs   | M calc  | delta | miss | pept score | exp val  | peptide            | modifications | retent time | Strongest gel slice | # gel slices found |
| BCG (1 day), [ST5]          | P08865      | 4%       | 74    | 1                 | 32947  | 4.8  | P08865 RSSA_HUMAN  | 90 102    | 602.25  | 1202.49 | 1202.64 | -0.16 | 0    | 52         | 5.30E-04 | K.FAAATGATPIAGR.F  |               | 15.09       | 31                  | 1                  |
| Experiment [Suppl. Table #] | accession # | coverage | score | distinct peptides | mass   | pl   | start AA           | end AA    | m/z obs | M obs   | M calc  | delta | miss | pept score | exp val  | peptide            | modifications | retent time | Strongest gel slice | # gel slices found |
| BCG (3 days, a), [ST6]      | P08865      | 4%       | 65    | 1                 | 32947  | 4.8  | P08865 RSSA_HUMAN  | 90 102    | 602.41  | 1202.81 | 1202.64 | 0.17  | 0    | 65         | 2.28E-05 | K.FAAATGATPIAGR.F  |               | 26.07       | 18                  | 2                  |
| beads (3 days), [ST10]      | P08865      | 4%       | 46    | 1                 | 32947  | 4.8  | P08865 RSSA_HUMAN  | 90 102    | 602.36  | 1202.7  | 1202.64 | 0.06  | 0    | 46         | 2.20E-03 | K.FAAATGATPIAGR.F  |               | 23.74       | 23                  | 1                  |
| Experiment [Suppl. Table #] | accession # | coverage | score | distinct peptides | mass   | pl   | start AA           | end AA    | m/z obs | M obs   | M calc  | delta | miss | pept score | exp val  | peptide            | modifications | retent time | Strongest gel slice | # gel slices found |
| BCG (5 days), [ST8]         | P18124      | 4%       | 83    | 1                 | 29264  | 10.7 | P18124 RL7_HUMAN   | 167 177   | 585.83  | 1169.64 | 1169.68 | -0.03 | 0    | 76         | 1.80E-06 | R.IALTDNALIAR.S    |               | 20.42       | 18                  | 1                  |
| beads (5 days), [ST11]      | P18124      | 4%       | 203   | 1                 | 29264  | 10.7 | P18124 RL7_HUMAN   | 167 177   | 585.82  | 1169.63 | 1169.68 | -0.05 | 0    | 73         | 3.50E-06 | R.IALTDNALIAR.S    |               | 21.41       | 19                  | 1                  |
| Experiment [Suppl. Table #] | accession # | coverage | score | distinct peptides | mass   | pl   | start AA           | end AA    | m/z obs | M obs   | M calc  | delta | miss | pept score | exp val  | peptide            | modifications | retent time | Strongest gel slice | # gel slices found |
| BCG (3 hours), [ST4]        | O75947      | 6%       | 69    | 1                 | 18537  | 5.2  | O75947 ATP5H_HUMAN | 64 72     | 497.2   | 992.39  | 992.48  | -0.09 | 0    | 38         | 1.10E-02 | K.AGLVDDFEK.K      |               | 21.56       | 22                  | 1                  |
| beads (3 hours), [ST9]      | O75947      | 6%       | 78    | 1                 | 18537  | 5.2  | O75947 ATP5H_HUMAN | 64 72     | 497.23  | 992.44  | 992.48  | -0.04 | 0    | 40         | 7.30E-03 | K.AGLVDDFEK.K      |               | 21.57       | 25                  | 1                  |
| Experiment [Suppl. Table #] | accession # | coverage | score | distinct peptides | mass   | pl   | start AA           | end AA    | m/z obs | M obs   | M calc  | delta | miss | pept score | exp val  | peptide            | modifications | retent time | Strongest gel slice | # gel slices found |
| BCG (3 days), [ST6]         | P59998      | 7%       | 128   | 1                 | 19768  | 8.5  | P59998 ARPC4_HUMAN | 61 71     | 593.88  | 1185.74 | 1185.67 | 0.07  | 0    | 35         | 2.70E-02 | K.VLIEGSIINVR.V    |               | 26.23       | 30                  | 1                  |
| beads (5 days), [ST11]      | P59998      | 7%       | 54    | 1                 | 19768  | 8.5  | P59998 ARPC4_HUMAN | 61 71     | 593.82  | 1185.62 | 1185.67 | -0.05 | 0    | 54         | 2.90E-04 | K.VLIEGSIINVR.V    |               | 20.59       | 25                  | 1                  |
| Experiment [Suppl. Table #] | accession # | coverage | score | distinct peptides | mass   | pl   | start AA           | end AA    | m/z obs | M obs   | M calc  | delta | miss | pept score | exp val  | peptide            | modifications | retent time | Strongest gel slice | # gel slices found |
| BCG (1 day), [ST5]          | P06733      | 2%       | 66    | 1                 | 47481  | 7    | P06733 ENO4_HUMAN  | 413 420   | 452.66  | 903.3   | 903.45  | -0.15 | 0    | 42         | 5.00E-03 | R.IEEELGSK.A       |               | 12.87       | 29                  | 2                  |
| beads (3 hours), [ST9]      | P06733      | 2%       | 70    | 1                 | 47481  | 7    | P06733 ENO4_HUMAN  | 222 228   | 401.23  | 800.44  | 800.46  | -0.02 | 0    | 35         | 3.50E-02 | K.EGLELLK.T        |               | 21.17       | 11                  | 1                  |
| Experiment [Suppl. Table #] | accession # | coverage | score | distinct peptides | mass   | pl   | start AA           | end AA    | m/z obs | M obs   | M calc  | delta | miss | pept score | exp val  | peptide            | modifications | retent time | Strongest gel slice | # gel slices found |
| BCG (5 days), [ST8]         | P50995      | 2%       | 53    | 1                 | 54697  | 7.5  | P50995 ANX11_HUMAN | 462 470   | 531.26  | 1060.51 | 1060.54 | -0.03 | 0    | 41         | 7.20E-03 | R.SETDLLDIR.S      |               | 21.01       | 10                  | 1                  |
| Experiment [Suppl. Table #] | accession # | coverage | score | distinct peptides | mass   | pl   | start AA           | end AA    | m/z obs | M obs   | M calc  | delta | miss | pept score | exp val  | peptide            | modifications | retent time | Strongest gel slice | # gel slices found |
| beads (5 days), [ST11]      | P27797      | 3%       | 123   | 1                 | 48283  | 4.3  | P27797 CALR_HUMAN  | 74 87     | 804.38  | 1606.75 | 1606.77 | -0.02 | 0    | 66         | 1.60E-05 | R.FYALSASFEPFSNK.G |               | 22.14       | 10                  | 2                  |
| Experiment [Suppl. Table #] | accession # | coverage | score | distinct peptides | mass   | pl   | start AA           | end AA    | m/z obs | M obs   | M calc  | delta | miss | pept score | exp val  | peptide            | modifications | retent time | Strongest gel slice | # gel slices found |
| BCG (1 day), [ST5]          | P23786      | 2%       | 44    | 1                 | 74244  | 8.4  | P23786 CPT2_HUMAN  | 152 161   | 540.19  | 1078.37 | 1078.54 | -0.17 | 0    | 37         | 1.40E-02 | R.ATNMVTSAIR.F     | Oxidation (M) | 12.87       | 24                  | 1                  |
| beads (3 hours), [ST9]      | P23786      | 2%       | 43    | 1                 | 74244  | 8.4  | P23786 CPT2_HUMAN  | 152 161   | 540.29  | 1078.56 | 1078.54 | 0.01  | 0    | 39         | 9.60E-03 | R.ATNMVTSAIR.F     | Oxidation (M) | 14.23       | 7                   | 1                  |
| Experiment [Suppl. Table #] | accession # | coverage | score | distinct peptides | mass   | pl   | start AA           | end AA    | m/z obs | M obs   | M calc  | delta | miss | pept score | exp val  | peptide            | modifications | retent time | Strongest gel slice | # gel slices found |
| BCG (5 days), [ST8]         | O9H444      | 6%       | 57    | 1                 | 24935  | 4.8  | O9H444 CHM4B_HUMAN | 94 107    | 773.35  | 1544.69 | 1544.77 | -0.08 | 0    | 57         | 1.40E-04 | R.EALENANTNTEVLK.N |               | 17.61       | 17                  | 1                  |
| Experiment [Suppl. Table #] | accession # | coverage | score | distinct peptides | mass   | pl   | start AA           | end AA    | m/z obs | M obs   | M calc  | delta | miss | pept score | exp val  | peptide            | modifications | retent time | Strongest gel slice | # gel slices found |
| BCG (3 days, b), [ST7]      | P09496      | 4%       | 44    | 1                 | 27174  | 4.4  | P09496 CLCA_HUMAN  | 121 129   | 494.74  | 987.47  | 987.5   | -0.02 | 0    | 44         | 3.90E-03 | R.LEALDANSR.K      |               | 13.99       | 21                  | 1                  |
| beads (5 days), [ST11]      | P09496      | 4%       | 49    | 1                 | 27174  | 4.4  | P09496 CLCA_HUMAN  | 121 129   | 494.72  | 987.43  | 987.5   | -0.07 | 0    | 49         | 1.30E-03 | R.LEALDANSR.K      |               | 15.68       | 19                  | 1                  |
| Experiment [Suppl. Table #] | accession # | coverage | score | distinct peptides | mass   | pl   | start AA           | end AA    | m/z obs | M obs   | M calc  | delta | miss | pept score | exp val  | peptide            | modifications | retent time | Strongest gel slice | # gel slices found |
| BCG (5 days), [ST8]         | P04839      | 2%       | 75    | 1                 | 66206  | 8.9  | P04839 CY24B_HUMAN | 549 559   | 581.27  | 1160.52 | 1160.54 | -0.02 | 0    | 77         | 1.70E-06 | K.QSISNSESSEGR.G   |               | 12.64       | 1                   | 2                  |
| beads (3 days), [ST10]      | P04839      | 2%       | 56    | 1                 | 66206  | 8.9  | P04839 CY24B_HUMAN | 549 559   | 581.35  | 1160.69 | 1160.54 | 0.14  | 0    | 56         | 2.10E-04 | K.QSISNSESSEGR.G   |               | 18.36       | 1                   | 1                  |
| Experiment [Suppl. Table #] | accession # | coverage | score | distinct peptides | mass   | pl   | start AA           | end AA    | m/z obs | M obs   | M calc  | delta | miss | pept score | exp val  | peptide            | modifications | retent time | Strongest gel slice | # gel slices found |
| BCG (3 hours), [ST4]        | P99999      | 13%      | 88    | 1                 | 11855  | 9.6  | P99999 CYC_HUMAN   | 41 54     | 714.75  | 1427.49 | 1427.67 | -0.18 | 0    | 37         | 1.50E-02 | K.TGQAPGYSYTAANK.N |               | 15.33       | 30                  | 1                  |
| beads (3 days), [ST10]      | P99999      | 13%      | 44    | 1                 | 11855  | 9.6  | P99999 CYC_HUMAN   | 41 54     | 714.87  | 1427.72 | 1427.67 | 0.05  | 0    | 33         | 3.70E-02 | K.TGQAPGYSYTAANK.N |               | 21.08       | 33                  | 1                  |
| Experiment [Suppl. Table #] | accession # | coverage | score | distinct peptides | mass   | pl   | start AA           | end AA    | m/z obs | M obs   | M calc  | delta | miss | pept score | exp val  | peptide            | modifications | retent time | Strongest gel slice | # gel slices found |
| BCG (3 days, b), [ST7]      | Q14204      | 0%       | 138   | 1                 | 534809 | 6    | Q14204 DYHC1_HUMAN | 2350 2358 | 491.27  | 980.52  | 980.53  | 0     | 0    | 39         | 7.70E-03 | K.YATLATVSR.C      |               | 16.07       | 2                   | 1                  |
| beads (5 days), [ST11]      | Q14204      | 0%       | 119   | 1                 | 534809 | 6    | Q14204 DYHC1_HUMAN | 2350 2358 | 491.25  | 980.49  | 980.53  | -0.04 | 0    | 42         | 4.10E-03 | K.YATLATVSR.C      |               | 16.62       | 1                   | 1                  |
| Experiment [Suppl. Table #] | accession # | coverage | score | distinct peptides | mass   | pl   | start AA           | end AA    | m/z obs | M obs   | M calc  | delta | miss | pept score | exp val  | peptide            | modifications | retent time | Strongest gel slice | # gel slices found |
| BCG (3 days, b), [ST7]      | Q9P2X0      | 11%      | 53    | 1                 | 10258  | 5.7  | Q9P2X0 DPM3_HUMAN  | 73 82     | 601.27  | 1200.52 | 1200.61 | -0.09 | 0    | 53         | 3.90E-04 | R.ELQSQIQEAR.A     |               | 13.74       | 45                  | 1                  |
| beads (3 days), [ST10]      | Q9P2X0      | 11%      | 55    | 1                 | 10258  | 5.7  | Q9P2X0 DPM3_HUMAN  | 73 82     | 601.33  | 1200.64 | 1200.61 | 0.03  | 0    | 55         | 2.40E-04 | R.ELQSQIQEAR.A     |               | 21.37       | 36                  | 1                  |

| Experiment [Suppl. Table #] | accession # | coverage | score | distinct peptides | mass   | pl  | start AA           | end AA                                                             | m/z obs | M obs  | M calc  | delta   | miss  | pept score | exp val  | peptide                 | modifications            | retent time   | Strongest gel slice | # gel slices found |   |
|-----------------------------|-------------|----------|-------|-------------------|--------|-----|--------------------|--------------------------------------------------------------------|---------|--------|---------|---------|-------|------------|----------|-------------------------|--------------------------|---------------|---------------------|--------------------|---|
| BCG (3 hours), [ST4]        | P13804      | 5%       | 127   | 1                 | 35400  | 8.6 | P13804 ETFA_HUMAN  | Electron transfer flavoprotein subunit alpha, mitochondrial        | 170 187 | 815.87 | 1629.72 | 1629.71 | 0.01  | 46         | 1.60E-03 | R.GTSTFDDAAATSGGASSEK.A |                          | 14.54         | 16                  | 1                  |   |
| beads (3 days), [ST10]      | P13804      | 5%       | 56    | 1                 | 35400  | 8.6 | P13804 ETFA_HUMAN  | Electron transfer flavoprotein subunit alpha, mitochondrial        | 170 187 | 815.91 | 1629.81 | 1629.71 | 0.1   | 46         | 1.50E-03 | R.GTSTFDDAAATSGGASSEK.A |                          | 24.5          | 20                  | 1                  |   |
| Experiment [Suppl. Table #] | accession # | coverage | score | distinct peptides | mass   | pl  | start AA           | end AA                                                             | m/z obs | M obs  | M calc  | delta   | miss  | pept score | exp val  | peptide                 | modifications            | retent time   | Strongest gel slice | # gel slices found |   |
| BCG (3 days, a), [ST6]      | P49411      | 2%       | 107   | 1                 | 49852  | 7.3 | P49411 EFTU_HUMAN  | Elongation factor Tu, mitochondrial                                | 71 79   | 460.31 | 918.6   | 918.54  | 0.07  | 38         | 1.20E-02 | K.TTLTAATIK.I           |                          | 27.19         | 14                  | 1                  |   |
| Experiment [Suppl. Table #] | accession # | coverage | score | distinct peptides | mass   | pl  | start AA           | end AA                                                             | m/z obs | M obs  | M calc  | delta   | miss  | pept score | exp val  | peptide                 | modifications            | retent time   | Strongest gel slice | # gel slices found |   |
| BCG (3 days, a), [ST6]      | P30040      | 4%       | 69    | 1                 | 29032  | 6.8 | P30040 ERP29_HUMAN | Endoplasmic reticulum protein ERp29                                | 183 192 | 538.29 | 1074.57 | 1074.53 | 0.04  | 69         | 9.30E-06 | K.QGQDNLSSVK.E          |                          | 18.16         | 23                  | 1                  |   |
| beads (3 days), [ST10]      | P30040      | 4%       | 60    | 1                 | 29032  | 6.8 | P30040 ERP29_HUMAN | Endoplasmic reticulum protein ERp29                                | 183 192 | 538.3  | 1074.58 | 1074.53 | 0.05  | 60         | 8.50E-05 | K.QGQDNLSSVK.E          |                          | 17.32         | 23                  | 1                  |   |
| Experiment [Suppl. Table #] | accession # | coverage | score | distinct peptides | mass   | pl  | start AA           | end AA                                                             | m/z obs | M obs  | M calc  | delta   | miss  | pept score | exp val  | peptide                 | modifications            | retent time   | Strongest gel slice | # gel slices found |   |
| BCG (3 days, b), [ST7]      | P62826      | 5%       | 69    | 1                 | 24579  | 7   | P62826 RAN_HUMAN   | GTP-binding nuclear protein Ran                                    | 13 23   | 508.27 | 1014.52 | 1014.57 | -0.05 | 41         | 7.20E-03 | K.LVLVGDGGTGK.T         |                          | 18.52         | 26                  | 1                  |   |
| beads (5 days), [ST11]      | P62826      | 5%       | 48    | 1                 | 24579  | 7   | P62826 RAN_HUMAN   | GTP-binding nuclear protein Ran                                    | 13 23   | 508.27 | 1014.52 | 1014.57 | -0.05 | 45         | 2.80E-03 | K.LVLVGDGGTGK.T         |                          | 19.78         | 22                  | 1                  |   |
| Experiment [Suppl. Table #] | accession # | coverage | score | distinct peptides | mass   | pl  | start AA           | end AA                                                             | m/z obs | M obs  | M calc  | delta   | miss  | pept score | exp val  | peptide                 | modifications            | retent time   | Strongest gel slice | # gel slices found |   |
| BCG (1 day), [ST5]          | P06396      | 1%       | 97    | 1                 | 86043  | 5.9 | P06396 GELS_HUMAN  | Gelsolin                                                           | 361 368 | 441.66 | 881.31  | 881.45  | -0.14 | 0          | 31       | 4.40E-02                | K.TASDFITK.M             |               | 14.66               | 19                 | 1 |
| beads (3 hours), [ST9]      | P06396      | 1%       | 55    | 1                 | 86043  | 5.9 | P06396 GELS_HUMAN  | Gelsolin                                                           | 616 623 | 444.25 | 886.49  | 886.49  | 0.01  | 0          | 39       | 1.20E-02                | K.TGAQELLR.V             |               | 15.98               | 5                  | 1 |
| Experiment [Suppl. Table #] | accession # | coverage | score | distinct peptides | mass   | pl  | start AA           | end AA                                                             | m/z obs | M obs  | M calc  | delta   | miss  | pept score | exp val  | peptide                 | modifications            | retent time   | Strongest gel slice | # gel slices found |   |
| BCG (3 days, b), [ST7]      | Q9UBI6      | 15%      | 49    | 1                 | 8115   | 9.1 | Q9UBI6 GBG12_HUMAN | Guanine nucleotide-binding protein G(i)/G(s)/G(o) subunit gamma-12 | 5 15    | 573.76 | 1145.5  | 1145.58 | -0.08 | 0          | 49       | 9.40E-04                | K.TASTNNAQAR.R           |               | 12.57               | 45                 | 1 |
| beads (3 days), [ST10]      | Q9UBI6      | 15%      | 85    | 1                 | 8115   | 9.1 | Q9UBI6 GBG12_HUMAN | Guanine nucleotide-binding protein G(i)/G(s)/G(o) subunit gamma-12 | 5 15    | 573.82 | 1145.63 | 1145.58 | 0.05  | 0          | 69       | 9.50E-06                | K.TASTNNAQAR.R           |               | 17.18               | 36                 | 1 |
| Experiment [Suppl. Table #] | accession # | coverage | score | distinct peptides | mass   | pl  | start AA           | end AA                                                             | m/z obs | M obs  | M calc  | delta   | miss  | pept score | exp val  | peptide                 | modifications            | retent time   | Strongest gel slice | # gel slices found |   |
| BCG (3 days, b), [ST7]      | Q92598      | 1%       | 61    | 1                 | 97716  | 5.3 | Q92598 HS105_HUMAN | Heat shock protein 105 kDa                                         | 462 471 | 560.3  | 1118.59 | 1118.61 | -0.02 | 0          | 47       | 3.90E-02                | R.FVVQNVSAQK.D           |               | 15.34               | 6                  | 2 |
| beads (5 days), [ST11]      | Q92598      | 1%       | 101   | 1                 | 97716  | 5.3 | Q92598 HS105_HUMAN | Heat shock protein 105 kDa                                         | 462 471 | 560.3  | 1118.6  | 1118.61 | -0.01 | 0          | 44       | 3.00E-03                | R.FVVQNVSAQK.D           |               | 16.3                | 3                  | 1 |
| Experiment [Suppl. Table #] | accession # | coverage | score | distinct peptides | mass   | pl  | start AA           | end AA                                                             | m/z obs | M obs  | M calc  | delta   | miss  | pept score | exp val  | peptide                 | modifications            | retent time   | Strongest gel slice | # gel slices found |   |
| BCG (3 days, b), [ST7]      | Q16543      | 2%       | 39    | 1                 | 44953  | 5.2 | Q16543 CDC37_HUMAN | co-chaperone Cdc37                                                 | 84 92   | 528.77 | 1055.52 | 1055.57 | -0.05 | 0          | 39       | 1.10E-02                | R.LQAEAQLR.K             |               | 13.3                | 13                 | 1 |
| beads (5 days), [ST11]      | Q16543      | 2%       | 45    | 1                 | 44953  | 5.2 | Q16543 CDC37_HUMAN | co-chaperone Cdc37                                                 | 84 92   | 528.79 | 1055.56 | 1055.57 | -0.01 | 0          | 42       | 4.70E-03                | R.LQAEAQLR.K             |               | 13.79               | 11                 | 1 |
| Experiment [Suppl. Table #] | accession # | coverage | score | distinct peptides | mass   | pl  | start AA           | end AA                                                             | m/z obs | M obs  | M calc  | delta   | miss  | pept score | exp val  | peptide                 | modifications            | retent time   | Strongest gel slice | # gel slices found |   |
| BCG (3 days, a), [ST6]      | Q9Y4L1      | 1%       | 159   | 1                 | 111494 | 5.2 | Q9Y4L1 HYOU1_HUMAN | Hypoxia up-regulated protein 1                                     | 283 291 | 524.33 | 1046.65 | 1046.55 | 0.09  | 0          | 46       | 2.30E-03                | R.LAGLFNEQR.K            |               | 28.21               | 3                  | 2 |
| beads (3 hours), [ST9]      | Q9Y4L1      | 1%       | 145   | 1                 | 111494 | 5.2 | Q9Y4L1 HYOU1_HUMAN | Hypoxia up-regulated protein 1                                     | 283 291 | 524.27 | 1046.52 | 1046.55 | -0.03 | 0          | 49       | 9.20E-04                | R.LAGLFNEQR.K            |               | 20.48               | 2                  | 2 |
| Experiment [Suppl. Table #] | accession # | coverage | score | distinct peptides | mass   | pl  | start AA           | end AA                                                             | m/z obs | M obs  | M calc  | delta   | miss  | pept score | exp val  | peptide                 | modifications            | retent time   | Strongest gel slice | # gel slices found |   |
| BCG (5 days), [ST8]         | Q04760      | 5%       | 77    | 1                 | 20992  | 5.1 | Q04760 LGUL_HUMAN  | Lactoylglutathione lyase                                           | 29 38   | 640.84 | 1279.66 | 1279.66 | 0     | 0          | 37       | 1.50E-02                | K.DFLQQTMLR.V            | Oxidation (M) | 21.55               | 22                 | 1 |
| beads (5 days), [ST11]      | Q04760      | 5%       | 69    | 1                 | 20992  | 5.1 | Q04760 LGUL_HUMAN  | Lactoylglutathione lyase                                           | 29 38   | 640.86 | 1279.7  | 1279.66 | 0.04  | 0          | 68       | 1.00E-05                | K.DFLQQTMLR.V            | Oxidation (M) | 21.47               | 23                 | 1 |
| Experiment [Suppl. Table #] | accession # | coverage | score | distinct peptides | mass   | pl  | start AA           | end AA                                                             | m/z obs | M obs  | M calc  | delta   | miss  | pept score | exp val  | peptide                 | modifications            | retent time   | Strongest gel slice | # gel slices found |   |
| BCG (1 day), [ST5]          | P13473      | 2%       | 105   | 1                 | 45503  | 5.3 | P13473 LAMP2_HUMAN | Lysosome-associated membrane glycoprotein 2                        | 153 161 | 526.17 | 1050.32 | 1050.5  | -0.18 | 0          | 58       | 7.40E-05                | R.CNSLSTLEK.N            |               | 14.22               | 16                 | 3 |
| beads (5 days), [ST11]      | P13473      | 2%       | 87    | 1                 | 45503  | 5.3 | P13473 LAMP2_HUMAN | Lysosome-associated membrane glycoprotein 2                        | 153 161 | 526.26 | 1050.5  | 1050.5  | 0     | 0          | 55       | 2.10E-04                | R.CNSLSTLEK.N            |               | 15.64               | 2                  | 1 |
| Experiment [Suppl. Table #] | accession # | coverage | score | distinct peptides | mass   | pl  | start AA           | end AA                                                             | m/z obs | M obs  | M calc  | delta   | miss  | pept score | exp val  | peptide                 | modifications            | retent time   | Strongest gel slice | # gel slices found |   |
| beads (3 days), [ST10]      | Q99571      | 5%       | 136   | 1                 | 44139  | 8.3 | Q99571 P2RX4_HUMAN | P2X4 purinoceptor 4                                                | 128 148 | 660.67 | 1978.98 | 1978.84 | 0.14  | 0          | 89       | 7.30E-08                | K.SDASCTAGSAGTHSGVSTGR.C |               | 18.18               | 1                  | 2 |
| Experiment [Suppl. Table #] | accession # | coverage | score | distinct peptides | mass   | pl  | start AA           | end AA                                                             | m/z obs | M obs  | M calc  | delta   | miss  | pept score | exp val  | peptide                 | modifications            | retent time   | Strongest gel slice | # gel slices found |   |
| BCG (3 hours), [ST4]        | Q06830      | 4%       | 78    | 1                 | 22324  | 8.3 | Q06830 PRDX1_HUMAN | Peroxiredoxin-1                                                    | 121 128 | 447.69 | 893.37  | 893.42  | -0.06 | 0          | 53       | 3.30E-04                | K.ADEGISFR.G             |               | 20.53               | 21                 | 1 |
| beads (3 days), [ST10]      | Q06830      | 6%       | 82    | 1                 | 22324  | 8.3 | Q06830 PRDX1_HUMAN | Peroxiredoxin-1                                                    | 17 27   | 590.8  | 1179.59 | 1179.56 | 0.03  | 0          | 46       | 1.70E-03                | K.ATAVMPDGQFK.D          | Oxidation (M) | 22                  | 27                 | 2 |
| Experiment [Suppl. Table #] | accession # | coverage | score | distinct peptides | mass   | pl  | start AA           | end AA                                                             | m/z obs | M obs  | M calc  | delta   | miss  | pept score | exp val  | peptide                 | modifications            | retent time   | Strongest gel slice | # gel slices found |   |
| BCG (3 days, a), [ST7]      | Q8NC51      | 4%       | 50    | 1                 | 44995  | 8.7 | Q8NC51 PAIRB_HUMAN | Plasminogen activator inhibitor 1                                  | 53 68   | 730.85 | 1459.69 | 1459.7  | -0.01 | 0          | 51       | 6.10E-04                | K.SAAQAAQTNSNAAGK.Q      |               | 12.12               | 12                 | 1 |
| beads (5 days), [ST11]      | Q8NC51      | 4%       | 106   | 1                 | 44995  | 8.7 | Q8NC51 PAIRB_HUMAN | Plasminogen activator inhibitor 1                                  | 53 68   | 730.83 | 1459.65 | 1459.7  | -0.05 | 0          | 81       | 5.80E-07                | K.SAAQAAQTNSNAAGK.Q      |               | 12.34               | 10                 | 1 |
| Experiment [Suppl. Table #] | accession # | coverage | score | distinct peptides | mass   | pl  | start AA           | end AA                                                             | m/z obs | M obs  | M calc  | delta   | miss  | pept score | exp val  | peptide                 | modifications            | retent time   | Strongest gel slice | # gel slices found |   |
| BCG (3 days, b), [ST7]      | Q06323      | 6%       | 139   | 1                 | 28876  | 5.8 | Q06323 PSME1_HUMAN | Proteasome activator complex subunit 1                             | 142 155 | 760.35 | 1518.69 | 1518.73 | -0.04 | 0          | 95       | 2.40E-08                | R.IEDGNFVAVQEK.V         |               | 19.29               | 25                 | 1 |
| beads (5 days), [ST11]      | Q06323      | 6%       | 90    | 1                 | 28876  | 5.8 | Q06323 PSME1_HUMAN | Proteasome activator complex subunit 1                             | 142 155 | 760.32 | 1518.62 | 1518.73 | -0.11 | 0          | 72       | 4.60E-06                | R.IEDGNFVAVQEK.V         |               | 20.27               | 19                 | 1 |
| Experiment [Suppl. Table #] | accession # | coverage | score | distinct peptides | mass   | pl  | start AA           | end AA                                                             | m/z obs | M obs  | M calc  | delta   | miss  | pept score | exp val  | peptide                 | modifications            | retent time   | Strongest gel slice | # gel slices found |   |
| BCG (3 days, b), [ST7]      | P25789      | 3%       | 62    | 1                 | 29750  | 7.6 | P25789 PSA4_HUMAN  | Proteasome subunit alpha type-4                                    | 9 17    | 504.25 | 1006.48 | 1006.51 | -0.03 | 0          | 33       | 4.10E-02                | R.TTIFSEPEGR.L           |               | 19.12               | 25                 | 1 |

|                                                       |                       |                 |             |                        |               |            |                                                                                                                                                                                                                                                        |  |  |  |  |  |       |    |   |
|-------------------------------------------------------|-----------------------|-----------------|-------------|------------------------|---------------|------------|--------------------------------------------------------------------------------------------------------------------------------------------------------------------------------------------------------------------------------------------------------|--|--|--|--|--|-------|----|---|
| beads (5 days), [ST11]                                | P25789                | 3%              | 73          | 1                      | 29750         | 7.6        | P25789[PSA4_HUMAN Proteasome subunit alpha type-4 OS=Homo sapiens GN=PSMA4 PE=1 SV=1<br>9 17 504.24 1006.46 1006.51 -0.05 0 44 2.90E-03 R.TTIFSPEGR.L                                                                                                  |  |  |  |  |  | 20.41 | 19 | 1 |
| Experiment [Suppl. Table #]<br>BCG (3 days, b), [ST7] | accession #<br>P49721 | coverage<br>5%  | score<br>51 | distinct peptides<br>1 | mass<br>22993 | pl<br>6.5  | start AA end AA m/z obs M obs M calc delta miss pept score exp val peptide<br>P49721[PSB2_HUMAN Proteasome subunit beta type-2 OS=Homo sapiens GN=PSMB2 PE=1 SV=1<br>20 29 538.77 1075.52 1075.57 -0.05 0 51 6.40E-04 R.VAASNVQMK.D                    |  |  |  |  |  | 13.38 | 28 | 1 |
| beads (5 days), [ST11]                                | P49721                | 5%              | 71          | 1                      | 22993         | 6.5        | P49721[PSB2_HUMAN Proteasome subunit beta type-2 OS=Homo sapiens GN=PSMB2 PE=1 SV=1<br>20 29 538.81 1075.57 1075.6 0.03 0 71 5.60E-06 R.VAASNVQMK.D                                                                                                    |  |  |  |  |  | 14.02 | 23 | 1 |
| Experiment [Suppl. Table #]<br>BCG (3 days, a), [ST6] | accession #<br>Q15084 | coverage<br>4%  | score<br>45 | distinct peptides<br>1 | mass<br>48490 | pl<br>5    | start AA end AA m/z obs M obs M calc delta miss pept score exp val peptide<br>Q15084[PDI A6_HUMAN Protein disulfide-isomerase A6 OS=Homo sapiens GN=PDI A6 PE=1 SV=1<br>393 409 808.53 1615.05 1614.84 0.21 0 37 1.50E-02 R.GSTAPVGGGAFPTIVER.E        |  |  |  |  |  | 30.79 | 13 | 1 |
| beads (3 hours), [ST9]                                | Q15084                | 4%              | 78          | 1                      | 48490         | 5          | Q15084[PDI A6_HUMAN Protein disulfide-isomerase A6 OS=Homo sapiens GN=PDI A6 PE=1 SV=1<br>393 409 808.41 1614.81 1614.84 -0.03 0 48 9.50E-04 R.GSTAPVGGGAFPTIVER.E                                                                                     |  |  |  |  |  | 21.22 | 11 | 1 |
| Experiment [Suppl. Table #]<br>BCG (5 days), [ST8]    | accession #<br>P50454 | coverage<br>3%  | score<br>81 | distinct peptides<br>1 | mass<br>46525 | pl<br>8.8  | start AA end AA m/z obs M obs M calc delta miss pept score exp val peptide<br>P50454[SERP H_HUMAN Serpin H1 OS=Homo sapiens GN=SERPINH1 PE=1 SV=2<br>394 405 647.32 1292.62 1292.67 -0.05 0 81 6.00E-07 R.DTQSGSLLFIGR.L                               |  |  |  |  |  | 21.68 | 12 | 1 |
| beads (3 days), [ST10]                                | P50454                | 3%              | 41          | 1                      | 46525         | 8.8        | P50454[SERP H_HUMAN Serpin H1 OS=Homo sapiens GN=SERPINH1 PE=1 SV=2<br>394 405 647.44 1292.87 1292.67 0.2 0 41 6.00E-03 R.DTQSGSLLFIGR.L                                                                                                               |  |  |  |  |  | 35.45 | 13 | 1 |
| Experiment [Suppl. Table #]<br>BCG (3 days, a), [ST6] | accession #<br>Q9H9B4 | coverage<br>4%  | score<br>50 | distinct peptides<br>1 | mass<br>35881 | pl<br>9.2  | start AA end AA m/z obs M obs M calc delta miss pept score exp val peptide<br>Q9H9B4[SFXN1_HUMAN Sideroflexin-1 OS=Homo sapiens GN=SFXN1 PE=1 SV=4<br>203 214 635.95 1269.89 1269.63 0.26 0 50 6.00E-04 K.VGIPVTDENGNR.L                               |  |  |  |  |  | 24.87 | 20 | 1 |
| beads (3 hours), [ST9]                                | Q9H9B4                | 4%              | 49          | 1                      | 35881         | 9.2        | Q9H9B4[SFXN1_HUMAN Sideroflexin-1 OS=Homo sapiens GN=SFXN1 PE=1 SV=4<br>203 214 635.79 1269.57 1269.63 -0.06 0 49 8.70E-04 K.VGIPVTDENGNR.L                                                                                                            |  |  |  |  |  | 17.28 | 18 | 1 |
| Experiment [Suppl. Table #]<br>BCG (3 days, a), [ST6] | accession #<br>Q86Y82 | coverage<br>3%  | score<br>80 | distinct peptides<br>1 | mass<br>31736 | pl<br>5.5  | start AA end AA m/z obs M obs M calc delta miss pept score exp val peptide<br>Q86Y82[STX12_HUMAN Syntaxin-12 OS=Homo sapiens GN=STX12 PE=1 SV=1<br>36 44 480.33 958.65 958.54 0.11 0 44 3.30E-03 R.ISQATAQIK.N                                         |  |  |  |  |  | 18.82 | 18 | 1 |
| beads (3 days), [ST10]                                | Q86Y82                | 3%              | 58          | 1                      | 31736         | 5.5        | Q86Y82[STX12_HUMAN Syntaxin-12 OS=Homo sapiens GN=STX12 PE=1 SV=1<br>36 44 480.3 958.59 958.54 0.05 0 35 3.10E-02 R.ISQATAQIK.N                                                                                                                        |  |  |  |  |  | 21.93 | 18 | 1 |
| Experiment [Suppl. Table #]<br>BCG (3 hours), [ST4]   | accession #<br>Q14956 | coverage<br>2%  | score<br>40 | distinct peptides<br>1 | mass<br>64623 | pl<br>6.2  | start AA end AA m/z obs M obs M calc delta miss pept score exp val peptide<br>Q14956[GPNMB_HUMAN Transmembrane glycoprotein NMB OS=Homo sapiens GN=GPNMB PE=1 SV=2<br>219 227 494.8 987.59 987.58 0.02 0 40 9.40E-03 R.A'YVPIAQVK.D                    |  |  |  |  |  | 19.69 | 10 | 2 |
| beads (3 hours), [ST9]                                | Q14956                | 2%              | 40          | 1                      | 64623         | 6.2        | Q14956[GPNMB_HUMAN Transmembrane glycoprotein NMB OS=Homo sapiens GN=GPNMB PE=1 SV=2<br>219 227 494.78 987.56 987.58 -0.02 0 40 9.00E-03 R.A'YVPIAQVK.D                                                                                                |  |  |  |  |  | 19.79 | 17 | 3 |
| Experiment [Suppl. Table #]<br>BCG (3 days, a), [ST6] | accession #<br>P38606 | coverage<br>2%  | score<br>45 | distinct peptides<br>1 | mass<br>68660 | pl<br>5.3  | start AA end AA m/z obs M obs M calc delta miss pept score exp val peptide<br>P38606[VATA_HUMAN Vacuolar ATP synthase catalytic subunit A OS=Homo sapiens GN=ATP6V1A PE=1 SV=2<br>309 323 766.48 1530.95 1530.78 0.17 0 38 9.90E-03 R.TALVANTSMPVAAR.E |  |  |  |  |  | 21.77 | 9  | 2 |
| beads (5 days), [ST11]                                | P38606                | 2%              | 160         | 1                      | 68660         | 5.3        | P38606[VATA_HUMAN Vacuolar ATP synthase catalytic subunit A OS=Homo sapiens GN=ATP6V1A PE=1 SV=2<br>309 323 766.38 1530.75 1530.78 -0.03 0 86 1.70E-07 R.TALVANTSMPVAAR.E                                                                              |  |  |  |  |  | 14.65 | 7  | 1 |
| Experiment [Suppl. Table #]<br>BCG (3 days, b), [ST7] | accession #<br>P12955 | coverage<br>2%  | score<br>41 | distinct peptides<br>1 | mass<br>55311 | pl<br>5.6  | start AA end AA m/z obs M obs M calc delta miss pept score exp val peptide<br>P12955[PEPD_HUMAN Xaa-Pro dipeptidase OS=Homo sapiens GN=PEPD PE=1 SV=3<br>18 27 557.35 1112.68 1112.67 0.01 0 43 4.00E-03 K.VPLALFALNR.Q                                |  |  |  |  |  | 22.1  | 12 | 1 |
| beads (5 days), [ST11]                                | P12955                | 2%              | 46          | 1                      | 55311         | 5.6        | P12955[PEPD_HUMAN Xaa-Pro dipeptidase OS=Homo sapiens GN=PEPD PE=1 SV=3<br>18 27 557.33 1112.66 1112.67 -0.02 0 47 1.50E-03 K.VPLALFALNR.Q                                                                                                             |  |  |  |  |  | 22.32 | 10 | 1 |
| Experiment [Suppl. Table #]<br>BCG (3 days, b), [ST7] | accession #<br>Q16698 | coverage<br>4%  | score<br>65 | distinct peptides<br>1 | mass<br>36330 | pl<br>9.3  | start AA end AA m/z obs M obs M calc delta miss pept score exp val peptide<br>Q16698[DEC R_HUMAN 2,4-dienoyl-CoA reductase, mitochondrial OS=Homo sapiens GN=DEC R1 PE=1 SV=1<br>61 73 589.34 1176.67 1176.65 0.02 0 33 4.20E-02 K.VAFITGGGTGLGK.G     |  |  |  |  |  | 19.81 | 20 | 1 |
| Experiment [Suppl. Table #]<br>BCG (5 days), [ST8]    | accession #<br>Q99714 | coverage<br>5%  | score<br>37 | distinct peptides<br>1 | mass<br>27134 | pl<br>7.7  | start AA end AA m/z obs M obs M calc delta miss pept score exp val peptide<br>Q99714[HCD2_HUMAN 3-hydroxyacyl-CoA dehydrogenase type-2 OS=Homo sapiens GN=HSD17B10 PE=1 SV=3<br>173 184 600.84 1199.67 1199.67 0.00 0 37 1.40E-02 K.GGVIGMTLPIAR.D     |  |  |  |  |  | 20.22 | 20 | 1 |
| Experiment [Suppl. Table #]<br>BCG (3 days, a), [ST6] | accession #<br>P62851 | coverage<br>8%  | score<br>67 | distinct peptides<br>1 | mass<br>13791 | pl<br>10.1 | start AA end AA m/z obs M obs M calc delta miss pept score exp val peptide<br>P62851[RS25_HUMAN 40S ribosomal protein S25 OS=Homo sapiens GN=RPS25 PE=1 SV=1<br>67 76 542.83 1083.65 1083.63 0.02 0 36 1.80E-02 K.LITPAVVSER.L                         |  |  |  |  |  | 26.12 | 31 | 1 |
| Experiment [Suppl. Table #]<br>BCG (5 days), [ST8]    | accession #<br>P62701 | coverage<br>3%  | score<br>61 | distinct peptides<br>1 | mass<br>29807 | pl<br>10.2 | start AA end AA m/z obs M obs M calc delta miss pept score exp val peptide<br>P62701[RS4X_HUMAN 40S ribosomal protein S4, X isoform OS=Homo sapiens GN=RPS4X PE=1 SV=2<br>222 230 495.79 989.56 989.59 -0.03 0 61 7.40E-05 R.LSNIFVIGK.G               |  |  |  |  |  | 21.08 | 18 | 1 |
| Experiment [Suppl. Table #]<br>BCG (3 hours), [ST4]   | accession #<br>P05388 | coverage<br>4%  | score<br>46 | distinct peptides<br>1 | mass<br>34423 | pl<br>5.7  | start AA end AA m/z obs M obs M calc delta miss pept score exp val peptide<br>P05388[RLA0_HUMAN 60S acidic ribosomal protein P0 OS=Homo sapiens GN=RPLP0 PE=1 SV=1<br>135 146 657.36 1312.7 1312.7 0 0 43 3.50E-03 K.TSFFQALGITTK.I                    |  |  |  |  |  | 22.86 | 13 | 1 |
| Experiment [Suppl. Table #]<br>BCG (3 days, b), [ST7] | accession #<br>P56385 | coverage<br>14% | score<br>47 | distinct peptides<br>1 | mass<br>7928  | pl<br>9.3  | start AA end AA m/z obs M obs M calc delta miss pept score exp val peptide<br>P56385[ATP5I_HUMAN ATP synthase subunit e, mitochondrial OS=Homo sapiens GN=ATP5I PE=2 SV=2<br>60 69 566.75 1131.49 1131.57 -0.08 0 47 1.50E-03 R.ELAEEDSLK.-            |  |  |  |  |  | 19.41 | 45 | 1 |
| Experiment [Suppl. Table #]<br>BCG (1 day), [ST5]     | accession #<br>Q13510 | coverage<br>3%  | score<br>40 | distinct peptides<br>1 | mass<br>45077 | pl<br>7.5  | start AA end AA m/z obs M obs M calc delta miss pept score exp val peptide<br>Q13510[ASAH1_HUMAN Acid ceramidase OS=Homo sapiens GN=ASAH1 PE=1 SV=4<br>82 92 612.2 1222.39 1222.6 -0.22 0 40 6.40E-03 K.NMINTFVPSGK.V                                  |  |  |  |  |  | 18.38 | 43 | 1 |
| Experiment [Suppl. Table #]<br>BCG (3 days, b), [ST7] | accession #<br>P14868 | coverage<br>2%  | score<br>52 | distinct peptides<br>1 | mass<br>57499 | pl<br>6.1  | start AA end AA m/z obs M obs M calc delta miss pept score exp val peptide<br>P14868[SYDC_HUMAN Aspartyl-tRNA synthetase, cytoplasmic OS=Homo sapiens GN=DARS PE=1 SV=2<br>321 330 604.31 1206.6 1206.62 -0.02 0 33 3.50E-02 R.FOTEIVTNK.Q             |  |  |  |  |  | 16.09 | 12 | 1 |
| Experiment [Suppl. Table #]<br>BCG (3 days, a), [ST6] | accession #<br>Q13884 | coverage<br>2%  | score<br>46 | distinct peptides<br>1 | mass<br>58367 | pl<br>8.8  | start AA end AA m/z obs M obs M calc delta miss pept score exp val peptide<br>Q13884[SNB1_HUMAN Beta-1-syntrophin OS=Homo sapiens GN=SNB1 PE=1 SV=3<br>254 263 560.31 1118.6 1118.5 0.1 0 46 2.20E-03 R.SMALADPENR.Q                                   |  |  |  |  |  | 19.72 | 10 | 1 |
| Experiment [Suppl. Table #]<br>BCG (5 days), [ST8]    | accession #<br>P07858 | coverage<br>2%  | score<br>51 | distinct peptides<br>1 | mass<br>38766 | pl<br>5.9  | start AA end AA m/z obs M obs M calc delta miss pept score exp val peptide<br>P07858[CATB_HUMAN Cathepsin B OS=Homo sapiens GN=CTSB PE=1 SV=3<br>238 245 499.73 997.44 997.48 -0.04 0 36 2.00E-02 K.DIMAEIYK.N                                         |  |  |  |  |  | 19.42 | 19 | 2 |



| Experiment [Suppl. Table #] | accession # | coverage | score | distinct peptides | mass   | pl  | start AA | end AA       | m/z obs   | M obs   | M calc  | delta | miss | pept score | exp val  | peptide             | modifications | retent time | Strongest gel slice | # gel slices found |
|-----------------------------|-------------|----------|-------|-------------------|--------|-----|----------|--------------|-----------|---------|---------|-------|------|------------|----------|---------------------|---------------|-------------|---------------------|--------------------|
| BCG (3 days, a), [ST6]      | O9UBR2      | 3%       | 67    | 1                 | 34530  | 6.7 | Q9UBR2   | CATZ_HUMAN   | 190 199   | 1009.56 | 1009.48 | 0.08  | 0    | 55         | 1.80E-04 | R.VGDYGLSLSGR.E     |               | 22.63       | 19                  | 1                  |
| Experiment [Suppl. Table #] | accession # | coverage | score | distinct peptides | mass   | pl  | start AA | end AA       | m/z obs   | M obs   | M calc  | delta | miss | pept score | exp val  | peptide             | modifications | retent time | Strongest gel slice | # gel slices found |
| BCG (1 day), [ST5]          | P31146      | 2%       | 79    | 1                 | 51678  | 6.3 | P31146   | COR1A_HUMAN  | 440 449   | 579.22  | 1156.43 | -0.21 | 0    | 57         | 1.60E-04 | K.LQATVQLQK.R       |               | 14.69       | 25                  | 1                  |
| Experiment [Suppl. Table #] | accession # | coverage | score | distinct peptides | mass   | pl  | start AA | end AA       | m/z obs   | M obs   | M calc  | delta | miss | pept score | exp val  | peptide             | modifications | retent time | Strongest gel slice | # gel slices found |
| BCG (1 day), [ST5]          | Q16555      | 2%       | 105   | 1                 | 62711  | 6   | Q16555   | DPYL2_HUMAN  | 259 268   | 516.2   | 1030.39 | -0.15 | 0    | 36         | 2.30E-02 | K.SSAEVIQAQR.K      |               | 13.12       | 24                  | 1                  |
| Experiment [Suppl. Table #] | accession # | coverage | score | distinct peptides | mass   | pl  | start AA | end AA       | m/z obs   | M obs   | M calc  | delta | miss | pept score | exp val  | peptide             | modifications | retent time | Strongest gel slice | # gel slices found |
| BCG (3 days, b), [ST7]      | O94905      | 4%       | 76    | 1                 | 38044  | 5.5 | O94905   | ERLN2_HUMAN  | 221 232   | 653.84  | 1305.66 | -0.03 | 0    | 76         | 1.60E-06 | K.VAQVAEITYGQK.V    |               | 18.68       | 15                  | 1                  |
| Experiment [Suppl. Table #] | accession # | coverage | score | distinct peptides | mass   | pl  | start AA | end AA       | m/z obs   | M obs   | M calc  | delta | miss | pept score | exp val  | peptide             | modifications | retent time | Strongest gel slice | # gel slices found |
| BCG (3 hours), [ST4]        | P27105      | 4%       | 122   | 1                 | 31882  | 7.7 | P27105   | STOM_HUMAN   | 221 232   | 632.3   | 1262.59 | 0     | 0    | 60         | 8.10E-05 | K.VIAAEGEMNASR.A    | Oxidation (M) | 13.25       | 16                  | 4                  |
| Experiment [Suppl. Table #] | accession # | coverage | score | distinct peptides | mass   | pl  | start AA | end AA       | m/z obs   | M obs   | M calc  | delta | miss | pept score | exp val  | peptide             | modifications | retent time | Strongest gel slice | # gel slices found |
| BCG (3 hours), [ST4]        | P15311      | 1%       | 85    | 1                 | 69484  | 5.9 | P15311   | EZR1_HUMAN   | 364 371   | 501.76  | 1001.51 | -0.01 | 0    | 39         | 1.20E-02 | R.ELSEIQIR.A        |               | 14.66       | 4                   | 1                  |
| Experiment [Suppl. Table #] | accession # | coverage | score | distinct peptides | mass   | pl  | start AA | end AA       | m/z obs   | M obs   | M calc  | delta | miss | pept score | exp val  | peptide             | modifications | retent time | Strongest gel slice | # gel slices found |
| BCG (3 days, a), [ST6]      | P09382      | 6%       | 78    | 1                 | 15048  | 5.3 | P09382   | LEG1_HUMAN   | 101 108   | 484.75  | 967.49  | 0.03  | 0    | 39         | 8.70E-03 | K.LPDGYEFK.F        |               | 26.19       | 35                  | 1                  |
| Experiment [Suppl. Table #] | accession # | coverage | score | distinct peptides | mass   | pl  | start AA | end AA       | m/z obs   | M obs   | M calc  | delta | miss | pept score | exp val  | peptide             | modifications | retent time | Strongest gel slice | # gel slices found |
| BCG (5 days), [ST8]         | P78417      | 6%       | 45    | 1                 | 27833  | 6.2 | P78417   | GSTO1_HUMAN  | 12 25     | 660.84  | 1319.66 | -0.02 | 0    | 32         | 4.90E-02 | K.GSAPPGVPVPEGSIR.I |               | 16.03       | 19                  | 1                  |
| Experiment [Suppl. Table #] | accession # | coverage | score | distinct peptides | mass   | pl  | start AA | end AA       | m/z obs   | M obs   | M calc  | delta | miss | pept score | exp val  | peptide             | modifications | retent time | Strongest gel slice | # gel slices found |
| BCG (3 days, b), [ST8]      | O00461      | 2%       | 58    | 1                 | 81888  | 4.7 | O00461   | GOL14_HUMAN  | 416 428   | 756.39  | 1510.76 | -0.05 | 0    | 58         | 1.10E-04 | R.LAVQVVEEAQQLR.E   |               | 20.08       | 4                   | 1                  |
| Experiment [Suppl. Table #] | accession # | coverage | score | distinct peptides | mass   | pl  | start AA | end AA       | m/z obs   | M obs   | M calc  | delta | miss | pept score | exp val  | peptide             | modifications | retent time | Strongest gel slice | # gel slices found |
| BCG (3 days, b), [ST7]      | Q14789      | 0%       | 46    | 1                 | 377215 | 5   | Q14789   | GOLB1_HUMAN  | 2082 2093 | 659.3   | 1316.59 | -0.06 | 0    | 44         | 3.30E-03 | K.VLLDDTQSEAA.R     |               | 16.29       | 6                   | 1                  |
| Experiment [Suppl. Table #] | accession # | coverage | score | distinct peptides | mass   | pl  | start AA | end AA       | m/z obs   | M obs   | M calc  | delta | miss | pept score | exp val  | peptide             | modifications | retent time | Strongest gel slice | # gel slices found |
| BCG (3 days, b), [ST7]      | P34932      | 1%       | 50    | 1                 | 95127  | 5.1 | P34932   | HSP74_HUMAN  | 755 764   | 567.28  | 1132.58 | -0.03 | 0    | 42         | 5.60E-03 | K.QSLTMDPVVK.S      | Oxidation (M) | 14.6        | 6                   | 1                  |
| Experiment [Suppl. Table #] | accession # | coverage | score | distinct peptides | mass   | pl  | start AA | end AA       | m/z obs   | M obs   | M calc  | delta | miss | pept score | exp val  | peptide             | modifications | retent time | Strongest gel slice | # gel slices found |
| BCG (3 days, a), [ST6]      | P04792      | 5%       | 84    | 1                 | 22826  | 6   | P04792   | HSPB1_HUMAN  | 80 89     | 538.32  | 1074.63 | 0.06  | 0    | 62         | 5.50E-05 | R.QLSSGVSEIR.H      |               | 24.28       | 24                  | 1                  |
| Experiment [Suppl. Table #] | accession # | coverage | score | distinct peptides | mass   | pl  | start AA | end AA       | m/z obs   | M obs   | M calc  | delta | miss | pept score | exp val  | peptide             | modifications | retent time | Strongest gel slice | # gel slices found |
| BCG (3 days, b), [ST7]      | Q7LGA3      | 3%       | 124   | 1                 | 42140  | 8.8 | Q7LGA3   | HS2ST_HUMAN  | 112 123   | 708.84  | 1415.66 | -0.02 | 0    | 58         | 1.00E-04 | K.NNPVMSLQDQVR.F    | Oxidation (M) | 19.48       | 13                  | 2                  |
| Experiment [Suppl. Table #] | accession # | coverage | score | distinct peptides | mass   | pl  | start AA | end AA       | m/z obs   | M obs   | M calc  | delta | miss | pept score | exp val  | peptide             | modifications | retent time | Strongest gel slice | # gel slices found |
| BCG (1 day), [ST5]          | Q14974      | 1%       | 100   | 1                 | 98420  | 4.7 | Q14974   | IMB1_HUMAN   | 43 54     | 613.25  | 1224.48 | -0.18 | 0    | 61         | 5.50E-05 | R.VLANPGNSQVAR.V    |               | 12.96       | 19                  | 1                  |
| Experiment [Suppl. Table #] | accession # | coverage | score | distinct peptides | mass   | pl  | start AA | end AA       | m/z obs   | M obs   | M calc  | delta | miss | pept score | exp val  | peptide             | modifications | retent time | Strongest gel slice | # gel slices found |
| BCG (5 days), [ST8]         | P05556      | 2%       | 52    | 1                 | 91714  | 5.3 | P05556   | ITB1_HUMAN   | 191 202   | 662.82  | 1323.63 | -0.04 | 0    | 48         | 1.20E-03 | K.TVMPYISTTPAK.L    | Oxidation (M) | 17.04       | 4                   | 1                  |
| Experiment [Suppl. Table #] | accession # | coverage | score | distinct peptides | mass   | pl  | start AA | end AA       | m/z obs   | M obs   | M calc  | delta | miss | pept score | exp val  | peptide             | modifications | retent time | Strongest gel slice | # gel slices found |
| BCG (3 days, a), [ST6]      | P40121      | 3%       | 81    | 1                 | 38779  | 5.9 | P40121   | CAPG_HUMAN   | 254 265   | 640.88  | 1279.75 | 0.14  | 0    | 69         | 8.80E-06 | K.VSDATGQMLNLT.K    | Oxidation (M) | 19.51       | 16                  | 1                  |
| Experiment [Suppl. Table #] | accession # | coverage | score | distinct peptides | mass   | pl  | start AA | end AA       | m/z obs   | M obs   | M calc  | delta | miss | pept score | exp val  | peptide             | modifications | retent time | Strongest gel slice | # gel slices found |
| BCG (3 days, b), [ST7]      | P40925      | 3%       | 43    | 1                 | 36631  | 6.9 | P40925   | MDHC_HUMAN   | 171 179   | 458.76  | 915.51  | 0     | 0    | 38         | 1.50E-02 | K.LGVTDANDV.K.N     |               | 13.74       | 19                  | 1                  |
| Experiment [Suppl. Table #] | accession # | coverage | score | distinct peptides | mass   | pl  | start AA | end AA       | m/z obs   | M obs   | M calc  | delta | miss | pept score | exp val  | peptide             | modifications | retent time | Strongest gel slice | # gel slices found |
| BCG (3 days, b), [ST7]      | Q14697      | 1%       | 153   | 1                 | 107263 | 5.7 | Q14697   | GANAB_HUMAN  | 158 164   | 437.22  | 872.43  | -0.03 | 0    | 36         | 2.40E-02 | R.LDLLEDR.S         |               | 20.08       | 6                   | 1                  |
| Experiment [Suppl. Table #] | accession # | coverage | score | distinct peptides | mass   | pl  | start AA | end AA       | m/z obs   | M obs   | M calc  | delta | miss | pept score | exp val  | peptide             | modifications | retent time | Strongest gel slice | # gel slices found |
| BCG (1 day), [ST5]          | Q92542      | 2%       | 114   | 1                 | 79103  | 5.7 | Q92542   | NICA_HUMAN   | 486 496   | 543.24  | 1084.46 | -0.16 | 0    | 37         | 1.70E-02 | K.ALADVATVLGR.A     |               | 20.47       | 13                  | 1                  |
| Experiment [Suppl. Table #] | accession # | coverage | score | distinct peptides | mass   | pl  | start AA | end AA       | m/z obs   | M obs   | M calc  | delta | miss | pept score | exp val  | peptide             | modifications | retent time | Strongest gel slice | # gel slices found |
| BCG (3 days, a), [ST6]      | P00558      | 2%       | 52    | 1                 | 44985  | 8.3 | P00558   | PGK1_HUMAN   | 354 361   | 460.75  | 919.48  | 0.02  | 0    | 38         | 1.20E-02 | K.KALMDEVVK.A       | Oxidation (M) | 22.37       | 14                  | 1                  |
| Experiment [Suppl. Table #] | accession # | coverage | score | distinct peptides | mass   | pl  | start AA | end AA       | m/z obs   | M obs   | M calc  | delta | miss | pept score | exp val  | peptide             | modifications | retent time | Strongest gel slice | # gel slices found |
| BCG (5 days), [ST8]         | Q8WUM4      | 1%       | 49    | 1                 | 96590  | 6.1 | Q8WUM4   | PDCE61_HUMAN | 340 350   | 585.31  | 1168.61 | -0.04 | 0    | 39         | 8.40E-03 | K.STPVNVPISQK.F     |               | 16.09       | 5                   | 1                  |
| Experiment [Suppl. Table #] | accession # | coverage | score | distinct peptides | mass   | pl  | start AA | end AA       | m/z obs   | M obs   | M calc  | delta | miss | pept score | exp val  | peptide             | modifications | retent time | Strongest gel slice | # gel slices found |
| BCG (3 days, b), [ST7]      | P35232      | 4%       | 62    | 1                 | 29843  | 5.6 | P35232   | PHB_HUMAN    | 134 143   | 575.27  | 1148.53 | -0.05 | 0    | 39         | 9.40E-03 | R.FDAGELITQR.E      |               | 20.39       | 25                  | 1                  |
| Experiment [Suppl. Table #] | accession # | coverage | score | distinct peptides | mass   | pl  | start AA | end AA       | m/z obs   | M obs   | M calc  | delta | miss | pept score | exp val  | peptide             | modifications | retent time | Strongest gel slice | # gel slices found |

|                                                       |                       |                |              |                        |               |            |                                                                                                                                                |        |                |              |                  |                  |           |                  |                     |                                |                                |                      |                           |                         |
|-------------------------------------------------------|-----------------------|----------------|--------------|------------------------|---------------|------------|------------------------------------------------------------------------------------------------------------------------------------------------|--------|----------------|--------------|------------------|------------------|-----------|------------------|---------------------|--------------------------------|--------------------------------|----------------------|---------------------------|-------------------------|
| BCG (5 days), [ST8]                                   | Q99623                | 3%             | 69           | 1                      | 33276         | 9.8        | Q99623 PHB2_HUMAN Prohibitin-2 OS=Homo sapiens GN=PHB2 PE=1 SV=2                                                                               | 148    | 157            | 589.31       | 1176.6           | 1176.63          | -0.03     | 0                | 69                  | 1.00E-05                       | K.FNASQLITQR.A                 | 20.28                | 16                        | 1                       |
| Experiment [Suppl. Table #]<br>BCG (3 hours), [ST4]   | accession #<br>P30101 | coverage<br>3% | score<br>63  | distinct peptides<br>1 | mass<br>57146 | pl<br>6    | start AA<br>P30101 PDIA3_HUMAN Protein disulfide-isomerase A3 OS=Homo sapiens GN=PDIA3 PE=1 SV=4                                               | end AA | m/z obs<br>367 | M obs<br>379 | M calc<br>684.88 | delta<br>1367.74 | miss<br>0 | pept score<br>32 | exp val<br>4.30E-02 | peptide<br>K.SEPIPEINDPQPKV    | modifications                  | retent time<br>15.81 | Strongest gel slice<br>7  | # gel slices found<br>1 |
| Experiment [Suppl. Table #]<br>BCG (5 days), [ST8]    | accession #<br>P61019 | coverage<br>7% | score<br>154 | distinct peptides<br>1 | mass<br>23702 | pl<br>6.1  | start AA<br>P61019 RAB2A_HUMAN Ras-related protein Rab-2A OS=Homo sapiens GN=RAB2A PE=1 SV=1                                                   | end AA | m/z obs<br>152 | M obs<br>165 | M calc<br>747.88 | delta<br>1493.75 | miss<br>0 | pept score<br>66 | exp val<br>1.70E-05 | peptide<br>K.TASNVEEAFINTAK.E  | modifications                  | retent time<br>20.8  | Strongest gel slice<br>22 | # gel slices found<br>1 |
| Experiment [Suppl. Table #]<br>BCG (5 days), [ST8]    | accession #<br>P34897 | coverage<br>2% | score<br>62  | distinct peptides<br>1 | mass<br>56414 | pl<br>8.8  | start AA<br>P34897 GLYM_HUMAN Serine hydroxymethyltransferase, mitochondrial OS=Homo sapiens GN=SHMT2 PE=1 SV=3                                | end AA | m/z obs<br>360 | M obs<br>368 | M calc<br>503.24 | delta<br>1004.5  | miss<br>0 | pept score<br>36 | exp val<br>2.30E-02 | peptide<br>R.AMADALLER.G       | modifications<br>Oxidation (M) | retent time<br>18.14 | Strongest gel slice<br>10 | # gel slices found<br>1 |
| Experiment [Suppl. Table #]<br>BCG (3 days, a), [ST6] | accession #<br>Q9UJZ1 | coverage<br>4% | score<br>38  | distinct peptides<br>2 | mass<br>38624 | pl<br>6.9  | start AA<br>Q9UJZ1 STML2_HUMAN Stomatin-like protein 2 OS=Homo sapiens GN=STOML2 PE=1 SV=1                                                     | end AA | m/z obs<br>322 | M obs<br>337 | M calc<br>757.97 | delta<br>1513.92 | miss<br>0 | pept score<br>38 | exp val<br>9.90E-03 | peptide<br>K.APVPGTDPDLSGSSR.D | modifications                  | retent time<br>27.35 | Strongest gel slice<br>16 | # gel slices found<br>1 |
| Experiment [Suppl. Table #]<br>BCG (3 days, b), [ST7] | accession #<br>P04179 | coverage<br>6% | score<br>103 | distinct peptides<br>1 | mass<br>24878 | pl<br>8.3  | start AA<br>P04179 SODM_HUMAN Superoxide dismutase [Mn], mitochondrial OS=Homo sapiens GN=SOD2 PE=1 SV=2                                       | end AA | m/z obs<br>76  | M obs<br>89  | M calc<br>712.87 | delta<br>1423.73 | miss<br>0 | pept score<br>66 | exp val<br>1.60E-05 | peptide<br>K.GDVTQIALQLPALK.F  | modifications                  | retent time<br>20.21 | Strongest gel slice<br>28 | # gel slices found<br>1 |
| Experiment [Suppl. Table #]<br>BCG (3 days, b), [ST7] | accession #<br>Q99536 | coverage<br>4% | score<br>38  | distinct peptides<br>1 | mass<br>42122 | pl<br>5.9  | start AA<br>Q99536 VAT1_HUMAN Synaptic vesicle membrane protein VAT-1 homolog OS=Homo sapiens GN=VAT1 PE=1 SV=2                                | end AA | m/z obs<br>256 | M obs<br>271 | M calc<br>795.85 | delta<br>1589.69 | miss<br>0 | pept score<br>32 | exp val<br>4.20E-02 | peptide<br>K.GVDIVMDPLGSDTAK.G | modifications<br>Oxidation (M) | retent time<br>18.63 | Strongest gel slice<br>14 | # gel slices found<br>1 |
| Experiment [Suppl. Table #]<br>BCG (3 days, b), [ST7] | accession #<br>P06753 | coverage<br>5% | score<br>83  | distinct peptides<br>1 | mass<br>32856 | pl<br>4.7  | start AA<br>P06753 TPM3_HUMAN Tropomyosin alpha-3 chain OS=Homo sapiens GN=TPM3 PE=1 SV=1                                                      | end AA | m/z obs<br>78  | M obs<br>90  | M calc<br>658.8  | delta<br>1315.58 | miss<br>0 | pept score<br>33 | exp val<br>3.70E-02 | peptide<br>K.AADAAEAVASLNR.R   | modifications                  | retent time<br>16.9  | Strongest gel slice<br>21 | # gel slices found<br>1 |
| Experiment [Suppl. Table #]<br>BCG (5 days), [ST8]    | accession #<br>P54577 | coverage<br>2% | score<br>64  | distinct peptides<br>1 | mass<br>59448 | pl<br>6.6  | start AA<br>P54577 SYCY_HUMAN Tyrosyl-tRNA synthetase, cytoplasmic OS=Homo sapiens GN=YARS PE=1 SV=4                                           | end AA | m/z obs<br>392 | M obs<br>400 | M calc<br>493.24 | delta<br>984.46  | miss<br>0 | pept score<br>35 | exp val<br>2.40E-02 | peptide<br>K.IDVGEAEPR.T       | modifications                  | retent time<br>14.87 | Strongest gel slice<br>9  | # gel slices found<br>1 |
| Experiment [Suppl. Table #]<br>BCG (3 hours), [ST4]   | accession #<br>Q6IAA8 | coverage<br>7% | score<br>43  | distinct peptides<br>1 | mass<br>17848 | pl<br>5    | start AA<br>Q6IAA8 CK059_HUMAN UPPF0404 protein C11orf59 OS=Homo sapiens GN=C11orf59 PE=1 SV=2                                                 | end AA | m/z obs<br>21  | M obs<br>31  | M calc<br>584.29 | delta<br>1166.56 | miss<br>0 | pept score<br>43 | exp val<br>3.10E-03 | peptide<br>K.LLLDPSPPTKA       | modifications                  | retent time<br>21.23 | Strongest gel slice<br>26 | # gel slices found<br>1 |
| Experiment [Suppl. Table #]<br>BCG (5 days), [ST8]    | accession #<br>P53990 | coverage<br>2% | score<br>56  | distinct peptides<br>1 | mass<br>39897 | pl<br>5.2  | start AA<br>P53990 K0174_HUMAN Uncharacterized protein KIAA0174 OS=Homo sapiens GN=KIAA0174 PE=1 SV=1                                          | end AA | m/z obs<br>110 | M obs<br>118 | M calc<br>508.76 | delta<br>1015.51 | miss<br>0 | pept score<br>56 | exp val<br>2.30E-04 | peptide<br>R.LQSEVAELKI        | modifications                  | retent time<br>15.99 | Strongest gel slice<br>12 | # gel slices found<br>1 |
| Experiment [Suppl. Table #]<br>BCG (1 day), [ST5]     | accession #<br>Q8IYS2 | coverage<br>1% | score<br>48  | distinct peptides<br>1 | mass<br>69684 | pl<br>8.4  | start AA<br>Q8IYS2 K2013_HUMAN Uncharacterized protein KIAA2013 OS=Homo sapiens GN=KIAA2013 PE=2 SV=1                                          | end AA | m/z obs<br>206 | M obs<br>214 | M calc<br>542.71 | delta<br>1083.4  | miss<br>0 | pept score<br>48 | exp val<br>1.20E-03 | peptide<br>R.IQLNPTER.V        | modifications                  | retent time<br>14.26 | Strongest gel slice<br>24 | # gel slices found<br>1 |
| Experiment [Suppl. Table #]<br>BCG (5 days), [ST8]    | accession #<br>P61421 | coverage<br>4% | score<br>69  | distinct peptides<br>1 | mass<br>40759 | pl<br>4.9  | start AA<br>P61421 VA0D1_HUMAN Vacuolar proton pump subunit d 1 OS=Homo sapiens GN=ATP6V0D1 PE=1 SV=1                                          | end AA | m/z obs<br>276 | M obs<br>288 | M calc<br>652.81 | delta<br>1303.6  | miss<br>0 | pept score<br>60 | exp val<br>7.90E-05 | peptide<br>K.LLFEAGSNPGDK.T    | modifications                  | retent time<br>19.97 | Strongest gel slice<br>15 | # gel slices found<br>1 |
| Experiment [Suppl. Table #]<br>BCG (3 days, b), [ST7] | accession #<br>P49748 | coverage<br>2% | score<br>75  | distinct peptides<br>1 | mass<br>70745 | pl<br>8.9  | start AA<br>P49748 ACADV_HUMAN Very long-chain specific acyl-CoA dehydrogenase, mitochondrial OS=Homo sapiens GN=ACADVL PE=1 SV=1              | end AA | m/z obs<br>460 | M obs<br>469 | M calc<br>589.28 | delta<br>1176.55 | miss<br>0 | pept score<br>36 | exp val<br>1.90E-02 | peptide<br>R.IFEGTNDLRL        | modifications                  | retent time<br>20.31 | Strongest gel slice<br>10 | # gel slices found<br>1 |
| Experiment [Suppl. Table #]<br>BCG (3 days, b), [ST7] | accession #<br>O75083 | coverage<br>2% | score<br>55  | distinct peptides<br>1 | mass<br>66836 | pl<br>6.2  | start AA<br>O75083 WDR1_HUMAN WD repeat-containing protein 1 OS=Homo sapiens GN=WDR1 PE=1 SV=4                                                 | end AA | m/z obs<br>29  | M obs<br>38  | M calc<br>564.25 | delta<br>1126.49 | miss<br>0 | pept score<br>34 | exp val<br>2.70E-02 | peptide<br>K.GNNFLYNGK.C       | modifications                  | retent time<br>18.56 | Strongest gel slice<br>10 | # gel slices found<br>1 |
| Experiment [Suppl. Table #]<br>BCG (5 days), [ST8]    | accession #<br>Q15942 | coverage<br>2% | score<br>47  | distinct peptides<br>1 | mass<br>62436 | pl<br>6.2  | start AA<br>Q15942 ZYX_HUMAN Zyxin OS=Homo sapiens GN=ZYX PE=1 SV=1                                                                            | end AA | m/z obs<br>254 | M obs<br>265 | M calc<br>538.77 | delta<br>1075.53 | miss<br>0 | pept score<br>47 | exp val<br>1.50E-03 | peptide<br>R.GPPASSPAPAPK.F    | modifications                  | retent time<br>12.81 | Strongest gel slice<br>7  | # gel slices found<br>1 |
| Experiment [Suppl. Table #]<br>beads (3 hours), [ST9] | accession #<br>P62263 | coverage<br>7% | score<br>80  | distinct peptides<br>1 | mass<br>16434 | pl<br>10.1 | start AA<br>P62263 RS14_HUMAN 40S ribosomal protein S14 OS=Homo sapiens GN=RPS14 PE=1 SV=3                                                     | end AA | m/z obs<br>107 | M obs<br>117 | M calc<br>527.72 | delta<br>1053.43 | miss<br>0 | pept score<br>80 | exp val<br>5.90E-07 | peptide<br>K.TPGPGAQSALR.A     | modifications                  | retent time<br>14.48 | Strongest gel slice<br>31 | # gel slices found<br>1 |
| beads (3 days), [ST10]                                | accession #<br>P62263 | coverage<br>7% | score<br>49  | distinct peptides<br>1 | mass<br>16434 | pl<br>10.1 | start AA<br>P62263 RS14_HUMAN 40S ribosomal protein S14 OS=Homo sapiens GN=RPS14 PE=1 SV=3                                                     | end AA | m/z obs<br>107 | M obs<br>117 | M calc<br>527.82 | delta<br>1053.62 | miss<br>0 | pept score<br>49 | exp val<br>8.00E-04 | peptide<br>K.TPGPGAQSALR.A     | modifications                  | retent time<br>19.2  | Strongest gel slice<br>31 | # gel slices found<br>1 |
| Experiment [Suppl. Table #]<br>beads (3 hours), [ST9] | accession #<br>P02649 | coverage<br>5% | score<br>41  | distinct peptides<br>1 | mass<br>36246 | pl<br>5.7  | start AA<br>P02649 APOE_HUMAN Apolipoprotein E OS=Homo sapiens GN=APOE PE=1 SV=1                                                               | end AA | m/z obs<br>210 | M obs<br>224 | M calc<br>749.4  | delta<br>1496.79 | miss<br>0 | pept score<br>34 | exp val<br>2.50E-02 | peptide<br>R.AATVGLAGQLQER.A   | modifications                  | retent time<br>20.13 | Strongest gel slice<br>17 | # gel slices found<br>1 |
| beads (5 days), [ST11]                                | accession #<br>P02649 | coverage<br>3% | score<br>59  | distinct peptides<br>1 | mass<br>36246 | pl<br>5.7  | start AA<br>P02649 APOE_HUMAN Apolipoprotein E OS=Homo sapiens GN=APOE PE=1 SV=1                                                               | end AA | m/z obs<br>199 | M obs<br>207 | M calc<br>484.74 | delta<br>967.47  | miss<br>0 | pept score<br>45 | exp val<br>2.00E-03 | peptide<br>R.LGPLVEQGR.V       | modifications                  | retent time<br>19.33 | Strongest gel slice<br>16 | # gel slices found<br>2 |
| Experiment [Suppl. Table #]<br>beads (3 hours), [ST9] | accession #<br>P16278 | coverage<br>2% | score<br>37  | distinct peptides<br>1 | mass<br>76499 | pl<br>6.1  | start AA<br>P16278 BGAL_HUMAN Beta-galactosidase OS=Homo sapiens GN=GLB1 PE=1 SV=1                                                             | end AA | m/z obs<br>286 | M obs<br>299 | M calc<br>754.9  | delta<br>1507.78 | miss<br>0 | pept score<br>37 | exp val<br>1.50E-02 | peptide<br>K.TEAVASSLYDILAR.G  | modifications                  | retent time<br>23.37 | Strongest gel slice<br>8  | # gel slices found<br>1 |
| beads (3 days), [ST10]                                | accession #<br>P16278 | coverage<br>2% | score<br>108 | distinct peptides<br>1 | mass<br>76499 | pl<br>6.1  | start AA<br>P16278 BGAL_HUMAN Beta-galactosidase OS=Homo sapiens GN=GLB1 PE=1 SV=1                                                             | end AA | m/z obs<br>286 | M obs<br>299 | M calc<br>754.93 | delta<br>1507.85 | miss<br>0 | pept score<br>60 | exp val<br>6.70E-05 | peptide<br>K.TEAVASSLYDILAR.G  | modifications                  | retent time<br>39.02 | Strongest gel slice<br>9  | # gel slices found<br>1 |
| Experiment [Suppl. Table #]<br>beads (5 days), [ST11] | accession #<br>P07686 | coverage<br>2% | score<br>82  | distinct peptides<br>1 | mass<br>63527 | pl<br>6.3  | start AA<br>P07686 HEXB_HUMAN Beta-hexosaminidase subunit beta OS=Homo sapiens GN=HEXB PE=1 SV=3                                               | end AA | m/z obs<br>391 | M obs<br>400 | M calc<br>550.34 | delta<br>1098.66 | miss<br>0 | pept score<br>56 | exp val<br>1.90E-04 | peptide<br>K.VLDIATINK.G       | modifications                  | retent time<br>21.55 | Strongest gel slice<br>20 | # gel slices found<br>1 |
| Experiment [Suppl. Table #]<br>beads (3 days), [ST10] | accession #<br>P39656 | coverage<br>3% | score<br>138 | distinct peptides<br>1 | mass<br>48893 | pl<br>5.4  | start AA<br>P39656 OST48_HUMAN Dolichyl-diphosphooligosaccharide-protein glycosyltransferase 48 kDa subunit OS=Homo sapiens GN=DDOST PE=1 SV=2 | end AA | m/z obs<br>61  | M obs<br>71  | M calc<br>580.36 | delta<br>1158.71 | miss<br>0 | pept score<br>43 | exp val<br>4.00E-03 | peptide<br>K.TADDPSSLIK.Y      | modifications                  | retent time<br>32.58 | Strongest gel slice<br>13 | # gel slices found<br>1 |
| beads (5 days), [ST11]                                | accession #<br>P39656 | coverage<br>1% | score<br>45  | distinct peptides<br>1 | mass<br>48893 | pl<br>5.4  | start AA<br>P39656 OST48_HUMAN Dolichyl-diphosphooligosaccharide-protein glycosyltransferase 48 kDa subunit OS=Homo sapiens GN=DDOST PE=1 SV=2 | end AA | m/z obs<br>343 | M obs<br>348 | M calc<br>373.71 | delta<br>745.4   | miss<br>0 | pept score<br>41 | exp val<br>7.90E-03 | peptide<br>R.IDPFRV.T          | modifications                  | retent time<br>19.99 | Strongest gel slice<br>10 | # gel slices found<br>2 |

| Experiment [Suppl. Table #]                           | accession # | coverage | score | distinct peptides | mass   | pl   | start AA | end AA      | m/z obs                                                             | M obs               | M calc  | delta   | miss  | pept score | exp val | peptide             | modifications | retent time | Strongest gel slice | # gel slices found |
|-------------------------------------------------------|-------------|----------|-------|-------------------|--------|------|----------|-------------|---------------------------------------------------------------------|---------------------|---------|---------|-------|------------|---------|---------------------|---------------|-------------|---------------------|--------------------|
| Experiment [Suppl. Table #]<br>beads (3 hours), [ST9] | Q9HAT2      | 2%       | 57    | 1                 | 58961  | 6.9  | Q9HAT2   | SIAE_HUMAN  | Sialate O-acetyltransferase OS=Homo sapiens                         | GN=SIAE PE=2 SV=1   |         |         |       |            |         | R.ELSNNTAAQYSVR.I   |               | 17.14       | 21                  | 1                  |
|                                                       |             |          |       |                   |        |      |          | 142         | 153                                                                 | 669.77              | 1337.53 | 1337.66 | -0.13 | 0          | 57      | 1.30E-04            |               |             |                     |                    |
| Experiment [Suppl. Table #]<br>beads (3 days), [ST10] | Q9HAT2      | 2%       | 63    | 1                 | 58961  | 6.9  | Q9HAT2   | SIAE_HUMAN  | Sialate O-acetyltransferase OS=Homo sapiens                         | GN=SIAE PE=2 SV=1   |         |         |       |            |         | R.ELSNNTAAQYSVR.I   |               | 23.31       | 23                  | 1                  |
|                                                       |             |          |       |                   |        |      |          | 142         | 153                                                                 | 669.87              | 1337.72 | 1337.66 | 0.06  | 0          | 63      | 3.80E-05            |               |             |                     |                    |
| Experiment [Suppl. Table #]<br>beads (3 hours), [ST9] | P40939      | 1%       | 71    | 1                 | 83688  | 9.2  | P40939   | ECHA_HUMAN  | Trifunctional enzyme subunit alpha, mitochondrial OS=Homo sapiens   | GN=HADHA PE=1 SV=2  |         |         |       |            |         | R.ILQEGVDPK.K       |               | 14.88       | 6                   | 1                  |
|                                                       |             |          |       |                   |        |      |          | 561         | 569                                                                 | 499.79              | 997.57  | 997.54  | 0.03  | 0          | 50      | 6.70E-04            |               |             |                     |                    |
| Experiment [Suppl. Table #]<br>beads (3 days), [ST10] | P40939      | 2%       | 146   | 1                 | 83688  | 9.2  | P40939   | ECHA_HUMAN  | Trifunctional enzyme subunit alpha, mitochondrial OS=Homo sapiens   | GN=HADHA PE=1 SV=2  |         |         |       |            |         | R.DTASAVAVGLK.Q     |               | 33.29       | 7                   | 1                  |
|                                                       |             |          |       |                   |        |      |          | 520         | 531                                                                 | 559.84              | 1117.66 | 1117.6  | 0.07  | 0          | 47      | 1.50E-03            |               |             |                     |                    |
| Experiment [Suppl. Table #]<br>beads (5 days), [ST11] | P62241      | 6%       | 74    | 1                 | 24475  | 10.3 | P62241   | RS8_HUMAN   | 40S ribosomal protein S8 OS=Homo sapiens                            | GN=RPS8 PE=1 SV=2   |         |         |       |            |         | K.ISSLLEEQFQGGK.L   |               | 20.85       | 20                  | 1                  |
|                                                       |             |          |       |                   |        |      |          | 158         | 170                                                                 | 753.9               | 1505.79 | 1505.77 | 0.02  | 0          | 74      | 3.00E-06            |               |             |                     |                    |
| Experiment [Suppl. Table #]<br>beads (5 days), [ST11] | P46781      | 4%       | 51    | 1                 | 22635  | 10.7 | P46781   | RS9_HUMAN   | 40S ribosomal protein S9 OS=Homo sapiens                            | GN=RPS9 PE=1 SV=3   |         |         |       |            |         | R.IGVLDLDEGK.M      |               | 17.37       | 23                  | 1                  |
|                                                       |             |          |       |                   |        |      |          | 84          | 91                                                                  | 415.74              | 829.47  | 829.45  | 0.01  | 0          | 47      | 1.90E-03            |               |             |                     |                    |
| Experiment [Suppl. Table #]<br>beads (3 hours), [ST9] | P48047      | 5%       | 81    | 1                 | 23377  | 10   | P48047   | ATPO_HUMAN  | ATP synthase subunit O, mitochondrial OS=Homo sapiens               | GN=ATP5O PE=1 SV=1  |         |         |       |            |         | K.VAASVLNYPVK.R     |               | 21.39       | 24                  | 1                  |
|                                                       |             |          |       |                   |        |      |          | 74          | 84                                                                  | 580.8               | 1159.58 | 1159.66 | -0.08 | 0          | 32      | 4.60E-02            |               |             |                     |                    |
| Experiment [Suppl. Table #]<br>beads (5 days), [ST11] | P80723      | 6%       | 44    | 1                 | 22680  | 4.6  | P80723   | BASP_HUMAN  | Brain acid soluble protein 1 OS=Homo sapiens                        | GN=BASP1 PE=1 SV=2  |         |         |       |            |         | K.ETPAATEAPSPSTPK.A |               | 13.25       | 10                  | 2                  |
|                                                       |             |          |       |                   |        |      |          | 185         | 198                                                                 | 693.82              | 1385.63 | 1385.67 | -0.04 | 0          | 44      | 3.00E-03            |               |             |                     |                    |
| Experiment [Suppl. Table #]<br>beads (3 days), [ST10] | P31930      | 3%       | 68    | 1                 | 53297  | 5.9  | P31930   | QCR1_HUMAN  | Cytochrome b-c1 complex subunit 1, mitochondrial OS=Homo sapiens    | GN=UQCRC1 PE=1 SV=3 |         |         |       |            |         | R.LCTSATESEVAR.G    |               | 23.06       | 13                  | 1                  |
|                                                       |             |          |       |                   |        |      |          | 379         | 390                                                                 | 662.35              | 1322.69 | 1322.61 | 0.07  | 0          | 55      | 2.20E-04            |               |             |                     |                    |
| Experiment [Suppl. Table #]<br>beads (3 days), [ST10] | P09622      | 2%       | 112   | 1                 | 54686  | 7.6  | P09622   | DLDH_HUMAN  | Dihydrolypolyl dehydrogenase, mitochondrial OS=Homo sapiens         | GN=DLDD PE=1 SV=1   |         |         |       |            |         | K.ADGGTQVIDTK.N     |               | 22.32       | 11                  | 1                  |
|                                                       |             |          |       |                   |        |      |          | 167         | 177                                                                 | 552.82              | 1103.63 | 1103.55 | 0.08  | 0          | 75      | 2.50E-06            |               |             |                     |                    |
| Experiment [Suppl. Table #]<br>beads (5 days), [ST11] | P49327      | 0%       | 124   | 1                 | 275850 | 6    | P49327   | FAS_HUMAN   | Fatty acid synthase OS=Homo sapiens                                 | GN=FASN PE=1 SV=2   |         |         |       |            |         | K.AQVADVVS.R.W      |               | 16.41       | 1                   | 1                  |
|                                                       |             |          |       |                   |        |      |          | 1073        | 1082                                                                | 522.3               | 1042.58 | 1042.58 | 0     | 0          | 32      | 4.70E-02            |               |             |                     |                    |
| Experiment [Suppl. Table #]<br>beads (3 days), [ST10] | P00338      | 3%       | 52    | 1                 | 36950  | 8.4  | P00338   | LDHA_HUMAN  | L-lactate dehydrogenase A chain OS=Homo sapiens                     | GN=LDHA PE=1 SV=2   |         |         |       |            |         | K.VLTLSSEEAR.L      |               | 25.29       | 19                  | 1                  |
|                                                       |             |          |       |                   |        |      |          | 306         | 315                                                                 | 567.8               | 1133.59 | 1133.56 | 0.04  | 0          | 34      | 2.90E-02            |               |             |                     |                    |
| Experiment [Suppl. Table #]<br>beads (5 days), [ST11] | P08575      | 1%       | 89    | 1                 | 148644 | 5.8  | P08575   | CD45_HUMAN  | Leukocyte common antigen OS=Homo sapiens                            | GN=PTPRC PE=1 SV=2  |         |         |       |            |         | K.ELISMIVV.K.Q      | Oxidation (M) | 20.68       | 1                   | 1                  |
|                                                       |             |          |       |                   |        |      |          | 1134        | 1143                                                                | 588.33              | 1174.65 | 1174.66 | -0.01 | 0          | 57      | 1.50E-04            |               |             |                     |                    |
| Experiment [Suppl. Table #]<br>beads (3 days), [ST10] | O60488      | 2%       | 62    | 1                 | 80220  | 8.7  | O60488   | ACSL4_HUMAN | Long-chain-fatty-acid-CoA ligase 4 OS=Homo sapiens                  | GN=ACSL4 PE=1 SV=2  |         |         |       |            |         | K.EILSEENEMQPNKG.V  | Oxidation (M) | 25.73       | 7                   | 1                  |
|                                                       |             |          |       |                   |        |      |          | 100         | 113                                                                 | 817.41              | 1632.8  | 1632.73 | 0.07  | 0          | 34      | 2.60E-02            |               |             |                     |                    |
| Experiment [Suppl. Table #]<br>beads (5 days), [ST11] | P61626      | 8%       | 107   | 1                 | 16982  | 9.4  | P61626   | LYSC_HUMAN  | Lysozyme C OS=Homo sapiens                                          | GN=LYZ PE=1 SV=1    |         |         |       |            |         | R.STDYGFQINSR.Y     |               | 21.3        | 6                   | 1                  |
|                                                       |             |          |       |                   |        |      |          | 69          | 80                                                                  | 700.84              | 1399.67 | 1399.67 | 0     | 0          | 51      | 5.30E-04            |               |             |                     |                    |
| Experiment [Suppl. Table #]<br>beads (3 hours), [ST9] | P22307      | 2%       | 74    | 1                 | 59640  | 6.4  | P22307   | NLTP_HUMAN  | Non-specific lipid-transfer protein OS=Homo sapiens                 | GN=SCP2 PE=1 SV=2   |         |         |       |            |         | K.MNPQSAFFQGGK.L    | Oxidation (M) | 20.85       | 34                  | 1                  |
|                                                       |             |          |       |                   |        |      |          | 512         | 522                                                                 | 635.76              | 1269.5  | 1269.58 | -0.08 | 0          | 58      | 1.10E-04            |               |             |                     |                    |
| Experiment [Suppl. Table #]<br>beads (5 days), [ST11] | P50897      | 3%       | 40    | 1                 | 34627  | 6.1  | P50897   | PPT1_HUMAN  | Palmitoyl-protein thioesterase 1 OS=Homo sapiens                    | GN=PPT1 PE=1 SV=1   |         |         |       |            |         | K.TLNAGAYS.K.V      |               | 13.63       | 18                  | 1                  |
|                                                       |             |          |       |                   |        |      |          | 166         | 174                                                                 | 462.74              | 923.46  | 923.47  | -0.01 | 0          | 40      | 6.10E-03            |               |             |                     |                    |
| Experiment [Suppl. Table #]<br>beads (5 days), [ST11] | P28070      | 4%       | 62    | 1                 | 29242  | 5.7  | P28070   | PSB4_HUMAN  | Proteasome subunit beta type-4 OS=Homo sapiens                      | GN=PSMB4 PE=1 SV=4  |         |         |       |            |         | K.QPVLSTQTEAR.D     |               | 14.44       | 22                  | 1                  |
|                                                       |             |          |       |                   |        |      |          | 202         | 211                                                                 | 564.77              | 1127.52 | 1127.59 | -0.08 | 0          | 61      | 6.20E-05            |               |             |                     |                    |
| Experiment [Suppl. Table #]<br>beads (5 days), [ST11] | P51148      | 6%       | 68    | 1                 | 23696  | 8.6  | P51148   | RAB5C_HUMAN | Ras-related protein Rab-5C OS=Homo sapiens                          | GN=RAB5C PE=1 SV=2  |         |         |       |            |         | K.NEPQATGAPGR.N     |               | 12.83       | 22                  | 2                  |
|                                                       |             |          |       |                   |        |      |          | 185         | 196                                                                 | 606.26              | 1210.5  | 1210.57 | -0.07 | 0          | 39      | 8.00E-03            |               |             |                     |                    |
| Experiment [Suppl. Table #]<br>beads (3 days), [ST10] | P55084      | 2%       | 104   | 1                 | 51547  | 9.4  | P55084   | ECHB_HUMAN  | Trifunctional enzyme subunit beta, mitochondrial OS=Homo sapiens    | GN=HADHB PE=1 SV=3  |         |         |       |            |         | R.TPFLLSGTSYK.D     |               | 34.11       | 13                  | 1                  |
|                                                       |             |          |       |                   |        |      |          | 62          | 72                                                                  | 607.37              | 1212.72 | 1212.64 | 0.08  | 0          | 52      | 4.90E-04            |               |             |                     |                    |
| Experiment [Suppl. Table #]<br>beads (5 days), [ST11] | P08670      | 2%       | 39    | 1                 | 53676  | 5.1  | P08670   | VIME_HUMAN  | Vimentin OS=Homo sapiens                                            | GN=VIM PE=1 SV=4    |         |         |       |            |         | K.FADLSEANR.N       |               | 18.55       | 9                   | 1                  |
|                                                       |             |          |       |                   |        |      |          | 295         | 304                                                                 | 547.26              | 1092.51 | 1092.52 | -0.01 | 0          | 39      | 8.10E-03            |               |             |                     |                    |
| Experiment [Suppl. Table #]<br>beads (3 days), [ST10] | P45880      | 3%       | 111   | 1                 | 32060  | 7.5  | P45880   | VDAC2_HUMAN | Voltage-dependent anion-selective channel protein 2 OS=Homo sapiens | GN=VDAC2 PE=1 SV=2  |         |         |       |            |         | K.LTSLALVDGK.S      |               | 35.85       | 20                  | 1                  |
|                                                       |             |          |       |                   |        |      |          | 268         | 277                                                                 | 508.82              | 1015.63 | 1015.59 | 0.04  | 0          | 62      | 5.30E-05            |               |             |                     |                    |

**Footnotes to Supplemental Table 12:**

\* All single-peptide based protein assignments underwent a BLAST Search ([www.expasy.org](http://www.expasy.org)) to check for a unique peptide sequences; in a few cases another possible protein isoform is indicated (protein homolog)

Data sets were searched with the Mascot search engine (see Perkins et al. (1999) *Electrophoresis* **20**, 3551-3567). Detailed are the SwissProt accession number, the number of distinct proteolytic peptides (in all cases "1"), and the sequence coverage of the protein (%).

Listed is the Mascot protein score as well as the score and expectation value for the individual peptide.  
Further columns indicate the position of the protein in the 1D-SDS PAGE gel (strongest lane in which the protein was identified, and the total # of adjacent gel lanes in which the protein was found)

**Supplemental Document: MS/MS spectra of all single-peptide based protein assignments and fragment ion mass table extracted from the MASCOT search engine results reports.**

Additional Information and mass spectrometric details can be found in Supplemental Table 12.

For single-peptide based protein assignment criteria see the “Methods” section of the main manuscript. As additional criteria, we required that each specific protein identified by a single-peptide based protein assignment be observed in more than one independent biological experiment either as part of a regular protein assignment observed together with multiple other peptides for that specific protein, or as another single-peptide based protein assignment.

MS/MS Fragmentation of **IVPNVLEQGK**

Found in **O75390**, O75390|CISY\_HUMAN Citrate synthase, mitochondrial OS=Homo sapiens GN=CS PE=1 SV=2

Match to Query 482: 1208.698618 from(605.356585,2+)

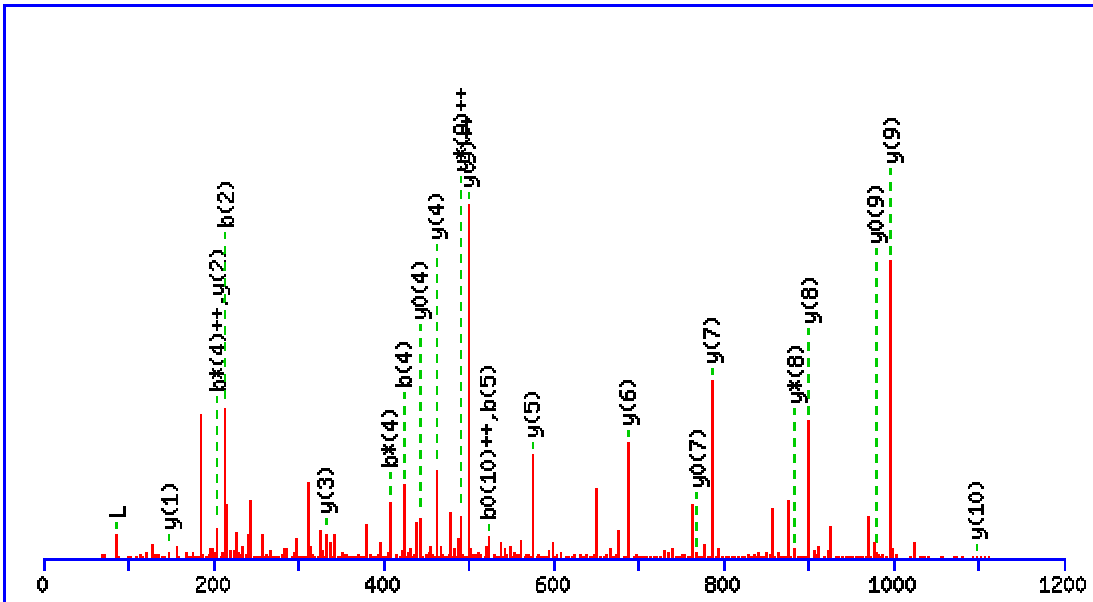

Monoisotopic mass of neutral peptide Mr(calc): 1208.7129

Fixed modifications: Carbamidomethyl (C)

Ions Score: 50 Expect: 0.00068

Matches (Bold Red): 25/105 fragment ions using 76 most intense peaks

| #  | Immon.         | b               | b <sup>++</sup> | b*              | b <sup>***</sup> | b <sup>0</sup> | b <sup>0++</sup> | Seq. | y                | y <sup>++</sup> | y*              | y <sup>***</sup> | y <sup>0</sup>  | y <sup>0++</sup> | #  |
|----|----------------|-----------------|-----------------|-----------------|------------------|----------------|------------------|------|------------------|-----------------|-----------------|------------------|-----------------|------------------|----|
| 1  | <b>86.0964</b> | 114.0913        | 57.5493         |                 |                  |                |                  | I    |                  |                 |                 |                  |                 |                  | 11 |
| 2  | 72.0808        | <b>213.1598</b> | 107.0835        |                 |                  |                |                  | V    | <b>1096.6361</b> | 548.8217        | 1079.6095       | 540.3084         | 1078.6255       | 539.8164         | 10 |
| 3  | 70.0651        | 310.2125        | 155.6099        |                 |                  |                |                  | P    | <b>997.5677</b>  | <b>499.2875</b> | 980.5411        | <b>490.7742</b>  | <b>979.5571</b> | 490.2822         | 9  |
| 4  | 87.0553        | <b>424.2554</b> | 212.6314        | <b>407.2289</b> | <b>204.1181</b>  |                |                  | N    | <b>900.5149</b>  | 450.7611        | <b>883.4884</b> | 442.2478         | 882.5043        | 441.7558         | 8  |
| 5  | 72.0808        | <b>523.3239</b> | 262.1656        | 506.2973        | 253.6523         |                |                  | V    | <b>786.4720</b>  | 393.7396        | 769.4454        | 385.2264         | <b>768.4614</b> | 384.7343         | 7  |
| 6  | <b>86.0964</b> | 636.4079        | 318.7076        | 619.3814        | 310.1943         |                |                  | L    | <b>687.4036</b>  | 344.2054        | 670.3770        | 335.6921         | 669.3930        | 335.2001         | 6  |
| 7  | <b>86.0964</b> | 749.4920        | 375.2496        | 732.4654        | 366.7364         |                |                  | L    | <b>574.3195</b>  | 287.6634        | 557.2930        | 279.1501         | 556.3089        | 278.6581         | 5  |
| 8  | 102.0550       | 878.5346        | 439.7709        | 861.5080        | 431.2577         | 860.5240       | 430.7656         | E    | <b>461.2354</b>  | 231.1214        | 444.2089        | 222.6081         | <b>443.2249</b> | 222.1161         | 4  |
| 9  | 101.0709       | 1006.5932       | 503.8002        | 989.5666        | 495.2869         | 988.5826       | 494.7949         | Q    | <b>332.1928</b>  | 166.6001        | 315.1663        | 158.0868         |                 |                  | 3  |
| 10 | 30.0338        | 1063.6146       | 532.3109        | 1046.5881       | 523.7977         | 1045.6041      | <b>523.3057</b>  | G    | <b>204.1343</b>  | 102.5708        | 187.1077        | 94.0575          |                 |                  | 2  |
| 11 | 101.1073       |                 |                 |                 |                  |                |                  | K    | <b>147.1128</b>  | 74.0600         | 130.0863        | 65.5468          |                 |                  | 1  |

MS/MS Fragmentation of **MVGDVTGAQAYASTAK**

Found in **Q01628**, Q01628|IFM3\_HUMAN Interferon-induced transmembrane protein 3 OS=Homo sapiens  
 GN=IFITM3 PE=2 SV=2

Match to Query 384: 1584.576544 from(793.295548,2+)

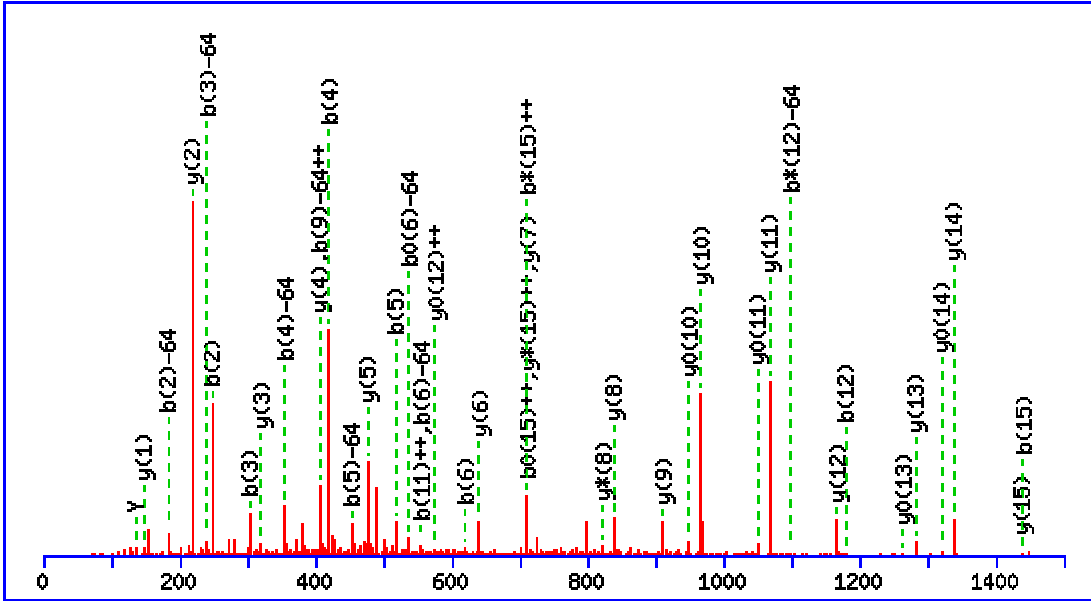

Monoisotopic mass of neutral peptide Mr(calc): 1584.7454

Fixed modifications: Carbamidomethyl (C)

Variable modifications:

M1 : Oxidation (M), with neutral losses 63.9983(shown in table), 0.0000

Ions Score: 116 Expect: 1.5e-010

Matches (Bold Red): 41/239 fragment ions using 72 most intense peaks

| #  | Immon.          | b               | b <sup>++</sup> | b*               | b <sup>***</sup> | b <sup>0</sup>  | b <sup>0++</sup> | Seq. | y                | y <sup>++</sup> | y*              | y <sup>***</sup> | y <sup>0</sup>   | y <sup>0++</sup> | #  |
|----|-----------------|-----------------|-----------------|------------------|------------------|-----------------|------------------|------|------------------|-----------------|-----------------|------------------|------------------|------------------|----|
| 1  | 56.0495         | 84.0444         | 42.5258         |                  |                  |                 |                  | M    |                  |                 |                 |                  |                  |                  | 16 |
| 2  | 72.0808         | <b>183.1128</b> | 92.0600         |                  |                  |                 |                  | V    | <b>1438.7173</b> | 719.8623        | 1421.6907       | <b>711.3490</b>  | 1420.7067        | 710.8570         | 15 |
| 3  | 30.0338         | <b>240.1343</b> | 120.5708        |                  |                  |                 |                  | G    | <b>1339.6488</b> | 670.3281        | 1322.6223       | 661.8148         | <b>1321.6383</b> | 661.3228         | 14 |
| 4  | 88.0393         | <b>355.1612</b> | 178.0842        |                  |                  | 337.1507        | 169.0790         | D    | <b>1282.6274</b> | 641.8173        | 1265.6008       | 633.3041         | <b>1264.6168</b> | 632.8120         | 13 |
| 5  | 72.0808         | <b>454.2296</b> | 227.6185        |                  |                  | 436.2191        | 218.6132         | V    | <b>1167.6004</b> | 584.3039        | 1150.5739       | 575.7906         | 1149.5899        | <b>575.2986</b>  | 12 |
| 6  | 74.0600         | <b>555.2773</b> | 278.1423        |                  |                  | <b>537.2667</b> | 269.1370         | T    | <b>1068.5320</b> | 534.7696        | 1051.5055       | 526.2564         | <b>1050.5215</b> | 525.7644         | 11 |
| 7  | 30.0338         | 612.2988        | 306.6530        |                  |                  | 594.2882        | 297.6477         | G    | <b>967.4843</b>  | 484.2458        | 950.4578        | 475.7325         | <b>949.4738</b>  | 475.2405         | 10 |
| 8  | 44.0495         | 683.3359        | 342.1716        |                  |                  | 665.3253        | 333.1663         | A    | <b>910.4629</b>  | 455.7351        | 893.4363        | 447.2218         | 892.4523         | 446.7298         | 9  |
| 9  | 101.0709        | 811.3945        | <b>406.2009</b> | 794.3679         | 397.6876         | 793.3839        | 397.1956         | Q    | <b>839.4258</b>  | 420.2165        | <b>822.3992</b> | 411.7032         | 821.4152         | 411.2112         | 8  |
| 10 | 44.0495         | 882.4316        | 441.7194        | 865.4050         | 433.2062         | 864.4210        | 432.7141         | A    | <b>711.3672</b>  | 356.1872        | 694.3406        | 347.6740         | 693.3566         | 347.1819         | 7  |
| 11 | <b>136.0757</b> | 1045.4949       | 523.2511        | 1028.4684        | 514.7378         | 1027.4843       | 514.2458         | Y    | <b>640.3301</b>  | 320.6687        | 623.3035        | 312.1554         | 622.3195         | 311.6634         | 6  |
| 12 | 44.0495         | 1116.5320       | 558.7696        | <b>1099.5055</b> | 550.2564         | 1098.5215       | 549.7644         | A    | <b>477.2667</b>  | 239.1370        | 460.2402        | 230.6237         | 459.2562         | 230.1317         | 5  |
| 13 | 60.0444         | 1203.5641       | 602.2857        | 1186.5375        | 593.7724         | 1185.5535       | 593.2804         | S    | <b>406.2296</b>  | 203.6185        | 389.2031        | 195.1052         | 388.2191         | 194.6132         | 4  |
| 14 | 74.0600         | 1304.6117       | 652.8095        | 1287.5852        | 644.2962         | 1286.6012       | 643.8042         | T    | <b>319.1976</b>  | 160.1024        | 302.1710        | 151.5892         | 301.1870         | 151.0972         | 3  |
| 15 | 44.0495         | 1375.6488       | 688.3281        | 1358.6223        | 679.8148         | 1357.6383       | 679.3228         | A    | <b>218.1499</b>  | 109.5786        | 201.1234        | 101.0653         |                  |                  | 2  |
| 16 | 101.1073        |                 |                 |                  |                  |                 |                  | K    | <b>147.1128</b>  | 74.0600         | 130.0863        | 65.5468          |                  |                  | 1  |

Interferon-induced transmembrane protein 3 (Q01628): single-peptide could possibly also be assigned to IFM1\_HUMAN Interferon-induced transmembrane protein 1 (P13164) or IFM2\_HUMAN Interferon-induced transmembrane protein 2 (Q01629)

MS/MS Fragmentation of **SVEETLR**

Found in **P30048**, P30048|PRDX3\_HUMAN Thioredoxin-dependent peroxide reductase, mitochondrial  
 OS=Homo sapiens GN=PRDX3 PE=1 SV=3

Match to Query 165: 832.414152 from(417.214352,2+)

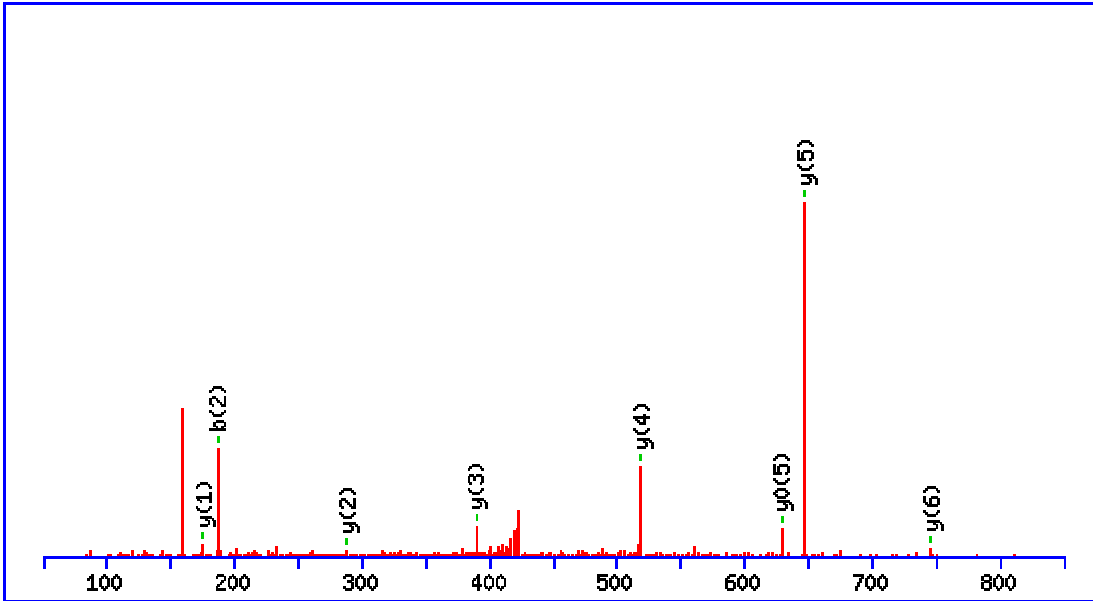

Monoisotopic mass of neutral peptide Mr(calc): 832.4290

Fixed modifications: Carbamidomethyl (C)

Ions Score: 42 Expect: 0.0055

Matches (Bold Red): 8/63 fragment ions using 19 most intense peaks

| # | Immon.   | b               | b <sup>++</sup> | b <sup>0</sup> | b <sup>0++</sup> | Seq. | y               | y <sup>++</sup> | y <sup>*</sup> | y <sup>*++</sup> | y <sup>0</sup>  | y <sup>0++</sup> | # |
|---|----------|-----------------|-----------------|----------------|------------------|------|-----------------|-----------------|----------------|------------------|-----------------|------------------|---|
| 1 | 60.0444  | 88.0393         | 44.5233         | 70.0287        | 35.5180          | S    |                 |                 |                |                  |                 |                  | 7 |
| 2 | 72.0808  | <b>187.1077</b> | 94.0575         | 169.0972       | 85.0522          | V    | <b>746.4043</b> | 373.7058        | 729.3777       | 365.1925         | 728.3937        | 364.7005         | 6 |
| 3 | 102.0550 | 316.1503        | 158.5788        | 298.1397       | 149.5735         | E    | <b>647.3359</b> | 324.1716        | 630.3093       | 315.6583         | <b>629.3253</b> | 315.1663         | 5 |
| 4 | 102.0550 | 445.1929        | 223.1001        | 427.1823       | 214.0948         | E    | <b>518.2933</b> | 259.6503        | 501.2667       | 251.1370         | 500.2827        | 250.6450         | 4 |
| 5 | 74.0600  | 546.2406        | 273.6239        | 528.2300       | 264.6186         | T    | <b>389.2507</b> | 195.1290        | 372.2241       | 186.6157         | 371.2401        | 186.1237         | 3 |
| 6 | 86.0964  | 659.3246        | 330.1660        | 641.3141       | 321.1607         | L    | <b>288.2030</b> | 144.6051        | 271.1765       | 136.0919         |                 |                  | 2 |
| 7 | 129.1135 |                 |                 |                |                  | R    | <b>175.1190</b> | 88.0631         | 158.0924       | 79.5498          |                 |                  | 1 |



MS/MS Fragmentation of **GTAVVNGEFK**

Found in **P30048**, P30048|PRDX3\_HUMAN Thioredoxin-dependent peroxide reductase, mitochondrial  
 OS=Homo sapiens GN=PRDX3 PE=1 SV=3

Match to Query 218: 1020.450338 from(511.232445,2+)

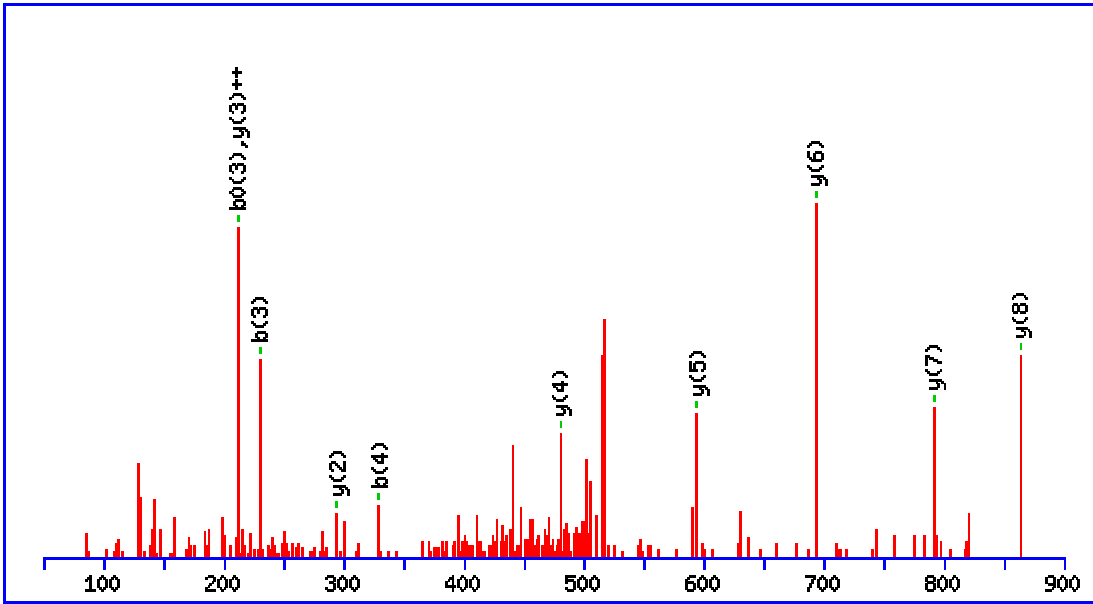

Monoisotopic mass of neutral peptide  $M_r(\text{calc})$ : 1020.5240

Fixed modifications: Carbamidomethyl (C)

Ions Score: 40 Expect: 0.0073

Matches (**Bold Red**): 10/102 fragment ions using 16 most intense peaks

| #  | Immon.   | b               | b <sup>++</sup> | b <sup>*</sup> | b <sup>*++</sup> | b <sup>0</sup>  | b <sup>0++</sup> | Seq.     | y               | y <sup>++</sup> | y <sup>*</sup> | y <sup>*++</sup> | y <sup>0</sup> | y <sup>0++</sup> | #         |
|----|----------|-----------------|-----------------|----------------|------------------|-----------------|------------------|----------|-----------------|-----------------|----------------|------------------|----------------|------------------|-----------|
| 1  | 30.0338  | 58.0287         | 29.5180         |                |                  |                 |                  | <b>G</b> |                 |                 |                |                  |                |                  | <b>10</b> |
| 2  | 74.0600  | 159.0764        | 80.0418         |                |                  | 141.0659        | 71.0366          | <b>T</b> | 964.5098        | 482.7585        | 947.4833       | 474.2453         | 946.4993       | 473.7533         | <b>9</b>  |
| 3  | 44.0495  | <b>230.1135</b> | 115.5604        |                |                  | <b>212.1030</b> | 106.5551         | <b>A</b> | <b>863.4621</b> | 432.2347        | 846.4356       | 423.7214         | 845.4516       | 423.2294         | <b>8</b>  |
| 4  | 72.0808  | <b>329.1819</b> | 165.0946        |                |                  | 311.1714        | 156.0893         | <b>V</b> | <b>792.4250</b> | 396.7162        | 775.3985       | 388.2029         | 774.4145       | 387.7109         | <b>7</b>  |
| 5  | 72.0808  | 428.2504        | 214.6288        |                |                  | 410.2398        | 205.6235         | <b>V</b> | <b>693.3566</b> | 347.1819        | 676.3301       | 338.6687         | 675.3461       | 338.1767         | <b>6</b>  |
| 6  | 87.0553  | 542.2933        | 271.6503        | 525.2667       | 263.1370         | 524.2827        | 262.6450         | <b>N</b> | <b>594.2882</b> | 297.6477        | 577.2617       | 289.1345         | 576.2776       | 288.6425         | <b>5</b>  |
| 7  | 30.0338  | 599.3148        | 300.1610        | 582.2882       | 291.6477         | 581.3042        | 291.1557         | <b>G</b> | <b>480.2453</b> | 240.6263        | 463.2187       | 232.1130         | 462.2347       | 231.6210         | <b>4</b>  |
| 8  | 102.0550 | 728.3573        | 364.6823        | 711.3308       | 356.1690         | 710.3468        | 355.6770         | <b>E</b> | 423.2238        | <b>212.1155</b> | 406.1973       | 203.6023         | 405.2132       | 203.1103         | <b>3</b>  |
| 9  | 120.0808 | 875.4258        | 438.2165        | 858.3992       | 429.7032         | 857.4152        | 429.2112         | <b>F</b> | <b>294.1812</b> | 147.5942        | 277.1547       | 139.0810         |                |                  | <b>2</b>  |
| 10 | 101.1073 |                 |                 |                |                  |                 |                  | <b>K</b> | 147.1128        | 74.0600         | 130.0863       | 65.5468          |                |                  | <b>1</b>  |

MS/MS Fragmentation of **ESLQQMAEVTR**

Found in **P14314**, P14314|GLU2B\_HUMAN Glucosidase 2 subunit beta OS=Homo sapiens GN=PRKCSH PE=1 SV=2

Match to Query 530: 1306.557494 from(654.286023,2+)

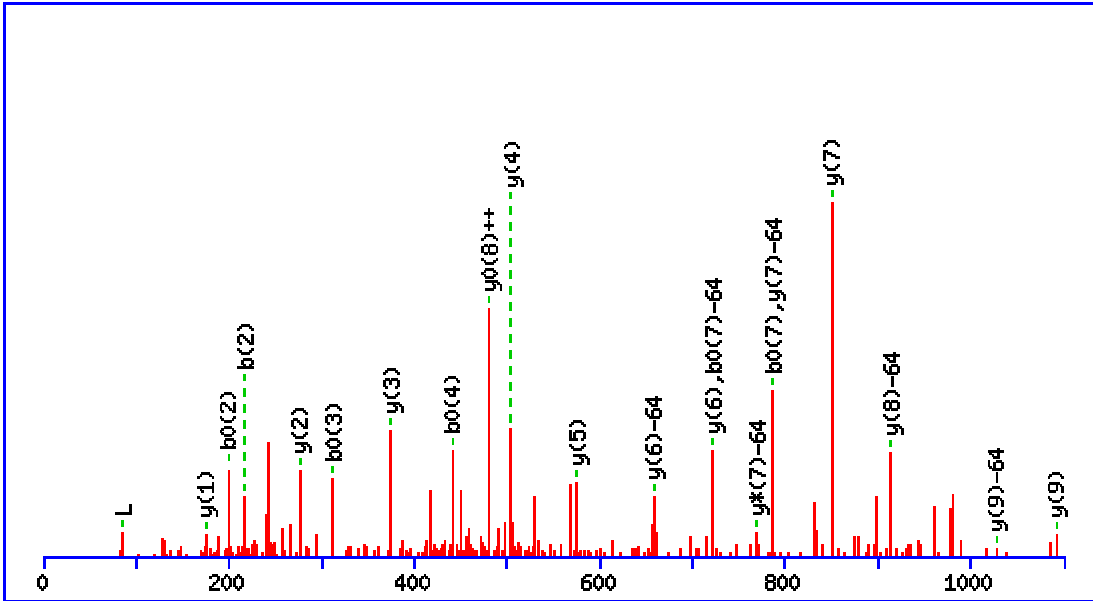

Monoisotopic mass of neutral peptide Mr(calc): 1306.6187

Fixed modifications: Carbamidomethyl (C)

Variable modifications:

M6 : Oxidation (M), with neutral losses 63.9983(shown in table), 0.0000

Ions Score: 72 Expect: 4.5e-006

Matches (Bold Red): 21/184 fragment ions using 25 most intense peaks

| #  | Immon.         | b               | b <sup>++</sup> | b <sup>*</sup> | b <sup>*++</sup> | b <sup>0</sup>  | b <sup>0++</sup> | Seq. | y                | y <sup>++</sup> | y <sup>*</sup>  | y <sup>*++</sup> | y <sup>0</sup> | y <sup>0++</sup> | #  |
|----|----------------|-----------------|-----------------|----------------|------------------|-----------------|------------------|------|------------------|-----------------|-----------------|------------------|----------------|------------------|----|
| 1  | 102.0550       | 130.0499        | 65.5286         |                |                  | 112.0393        | 56.5233          | E    |                  |                 |                 |                  |                |                  | 11 |
| 2  | 60.0444        | <b>217.0819</b> | 109.0446        |                |                  | <b>199.0713</b> | 100.0393         | S    | 1114.5851        | 557.7962        | 1097.5586       | 549.2829         | 1096.5746      | 548.7909         | 10 |
| 3  | <b>86.0964</b> | 330.1660        | 165.5866        |                |                  | <b>312.1554</b> | 156.5813         | L    | <b>1027.5531</b> | 514.2802        | 1010.5265       | 505.7669         | 1009.5425      | 505.2749         | 9  |
| 4  | 101.0709       | 458.2245        | 229.6159        | 441.1980       | 221.1026         | <b>440.2140</b> | 220.6106         | Q    | <b>914.4690</b>  | 457.7382        | 897.4425        | 449.2249         | 896.4585       | 448.7329         | 8  |
| 5  | 101.0709       | 586.2831        | 293.6452        | 569.2566       | 285.1319         | 568.2726        | 284.6399         | Q    | <b>786.4104</b>  | 393.7089        | <b>769.3839</b> | 385.1956         | 768.3999       | 384.7036         | 7  |
| 6  | 56.0495        | 669.3202        | 335.1638        | 652.2937       | 326.6505         | 651.3097        | 326.1585         | M    | <b>658.3519</b>  | 329.6796        | 641.3253        | 321.1663         | 640.3413       | 320.6743         | 6  |
| 7  | 44.0495        | 740.3574        | 370.6823        | 723.3308       | 362.1690         | <b>722.3468</b> | 361.6770         | A    | <b>575.3148</b>  | 288.1610        | 558.2882        | 279.6477         | 557.3042       | 279.1557         | 5  |
| 8  | 102.0550       | 869.3999        | 435.2036        | 852.3734       | 426.6903         | 851.3894        | 426.1983         | E    | <b>504.2776</b>  | 252.6425        | 487.2511        | 244.1292         | 486.2671       | 243.6372         | 4  |
| 9  | 72.0808        | 968.4684        | 484.7378        | 951.4418       | 476.2245         | 950.4578        | 475.7325         | V    | <b>375.2350</b>  | 188.1212        | 358.2085        | 179.6079         | 357.2245       | 179.1159         | 3  |
| 10 | 74.0600        | 1069.5160       | 535.2617        | 1052.4895      | 526.7484         | 1051.5055       | 526.2564         | T    | <b>276.1666</b>  | 138.5870        | 259.1401        | 130.0737         | 258.1561       | 129.5817         | 2  |
| 11 | 129.1135       |                 |                 |                |                  |                 |                  | R    | <b>175.1190</b>  | 88.0631         | 158.0924        | 79.5498          |                |                  | 1  |

MS/MS Fragmentation of **IQTQPGYANTLR**

Found in **Q00325**, Q00325|MPCP\_HUMAN Phosphate carrier protein, mitochondrial OS=Homo sapiens  
 GN=SLC25A3 PE=1 SV=2

Match to Query 378: 1360.875740 from(681.445146,2+)

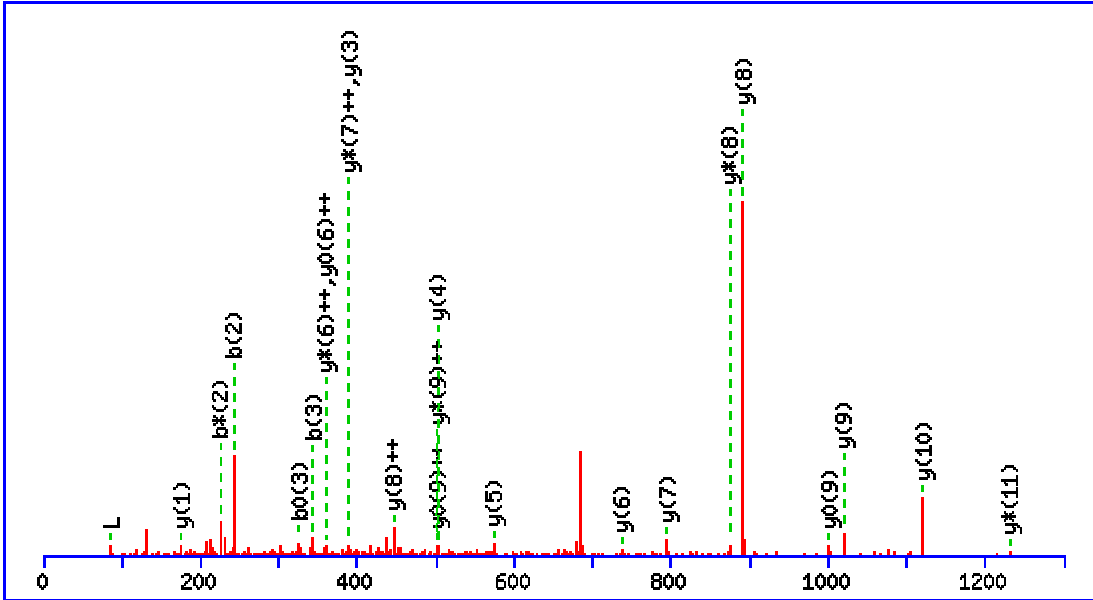

Monoisotopic mass of neutral peptide Mr(calc): 1360.7099

Fixed modifications: Carbamidomethyl (C)

Ions Score: 52 Expect: 0.00052

Matches (Bold Red): 24/134 fragment ions using 49 most intense peaks

| #  | Immon.         | b               | b <sup>++</sup> | b <sup>*</sup>  | b <sup>***</sup> | b <sup>0</sup>  | b <sup>0++</sup> | Seq. | y                | y <sup>++</sup> | y <sup>*</sup>   | y <sup>***</sup> | y <sup>0</sup>   | y <sup>0++</sup> | #  |
|----|----------------|-----------------|-----------------|-----------------|------------------|-----------------|------------------|------|------------------|-----------------|------------------|------------------|------------------|------------------|----|
| 1  | <b>86.0964</b> | 114.0913        | 57.5493         |                 |                  |                 |                  | I    |                  |                 |                  |                  |                  |                  | 12 |
| 2  | 101.0709       | <b>242.1499</b> | 121.5786        | <b>225.1234</b> | 113.0653         |                 |                  | Q    | 1248.6331        | 624.8202        | <b>1231.6066</b> | 616.3069         | 1230.6226        | 615.8149         | 11 |
| 3  | 74.0600        | <b>343.1976</b> | 172.1024        | 326.1710        | 163.5892         | <b>325.1870</b> | 163.0972         | T    | <b>1120.5746</b> | 560.7909        | 1103.5480        | 552.2776         | 1102.5640        | 551.7856         | 10 |
| 4  | 101.0709       | 471.2562        | 236.1317        | 454.2296        | 227.6185         | 453.2456        | 227.1264         | Q    | <b>1019.5269</b> | 510.2671        | 1002.5003        | <b>501.7538</b>  | <b>1001.5163</b> | <b>501.2618</b>  | 9  |
| 5  | 70.0651        | 568.3089        | 284.6581        | 551.2824        | 276.1448         | 550.2984        | 275.6528         | P    | <b>891.4683</b>  | <b>446.2378</b> | <b>874.4417</b>  | 437.7245         | 873.4577         | 437.2325         | 8  |
| 6  | 30.0338        | 625.3304        | 313.1688        | 608.3039        | 304.6556         | 607.3198        | 304.1636         | G    | <b>794.4155</b>  | 397.7114        | 777.3890         | <b>389.1981</b>  | 776.4050         | 388.7061         | 7  |
| 7  | 136.0757       | 788.3937        | 394.7005        | 771.3672        | 386.1872         | 770.3832        | 385.6952         | Y    | <b>737.3941</b>  | 369.2007        | 720.3675         | <b>360.6874</b>  | 719.3835         | <b>360.1954</b>  | 6  |
| 8  | 44.0495        | 859.4308        | 430.2191        | 842.4043        | 421.7058         | 841.4203        | 421.2138         | A    | <b>574.3307</b>  | 287.6690        | 557.3042         | 279.1557         | 556.3202         | 278.6637         | 5  |
| 9  | 87.0553        | 973.4738        | 487.2405        | 956.4472        | 478.7273         | 955.4632        | 478.2352         | N    | <b>503.2936</b>  | 252.1504        | 486.2671         | 243.6372         | 485.2831         | 243.1452         | 4  |
| 10 | 74.0600        | 1074.5215       | 537.7644        | 1057.4949       | 529.2511         | 1056.5109       | 528.7591         | T    | <b>389.2507</b>  | 195.1290        | 372.2241         | 186.6157         | 371.2401         | 186.1237         | 3  |
| 11 | <b>86.0964</b> | 1187.6055       | 594.3064        | 1170.5790       | 585.7931         | 1169.5950       | 585.3011         | L    | 288.2030         | 144.6051        | 271.1765         | 136.0919         |                  |                  | 2  |
| 12 | 129.1135       |                 |                 |                 |                  |                 |                  | R    | <b>175.1190</b>  | 88.0631         | 158.0924         | 79.5498          |                  |                  | 1  |

MS/MS Fragmentation of **STESLQANVQR**

Found in **P26373**, P26373|RL13\_HUMAN 60S ribosomal protein L13 OS=Homo sapiens GN=RPL13 PE=1 SV=4

Match to Query 410: 1231.650074 from(616.832313,2,+)

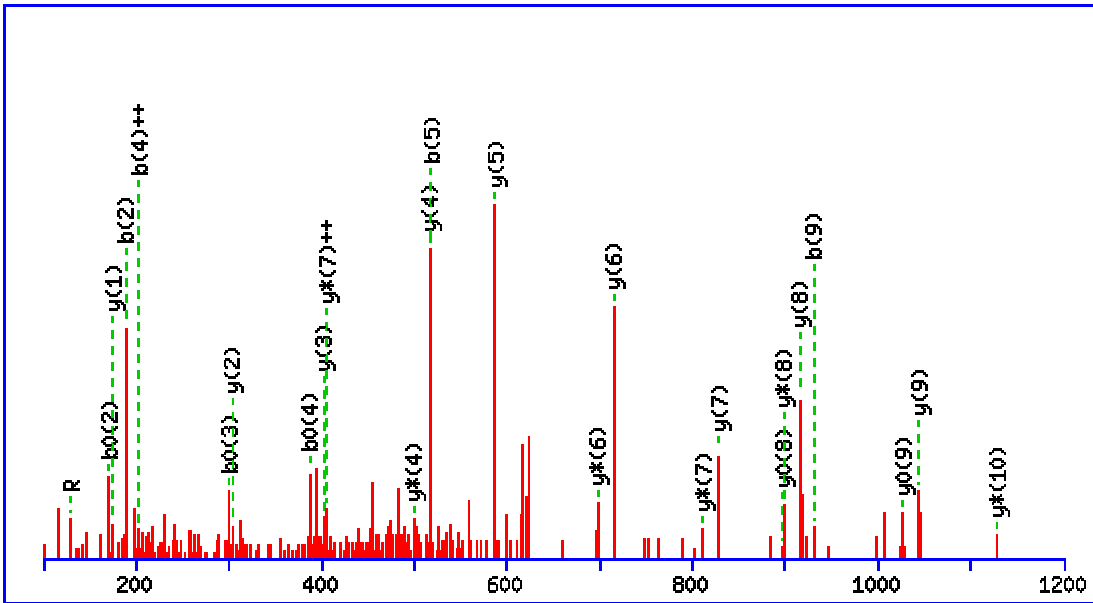

Monoisotopic mass of neutral peptide  $M_r(\text{calc})$ : 1231.6157

Fixed modifications: Carbamidomethyl (C)

Ions Score: 46 Expect: 0.0019

Matches (**Bold Red**): 25/107 fragment ions using 63 most intense peaks

| #  | Immon.          | b               | b <sup>++</sup> | b <sup>*</sup> | b <sup>*++</sup> | b <sup>0</sup>  | b <sup>0++</sup> | Seq. | y                | y <sup>++</sup> | y <sup>*</sup>   | y <sup>*++</sup> | y <sup>0</sup>   | y <sup>0++</sup> | #  |
|----|-----------------|-----------------|-----------------|----------------|------------------|-----------------|------------------|------|------------------|-----------------|------------------|------------------|------------------|------------------|----|
| 1  | 60.0444         | 88.0393         | 44.5233         |                |                  | 70.0287         | 35.5180          | S    |                  |                 |                  |                  |                  |                  | 11 |
| 2  | 74.0600         | <b>189.0870</b> | 95.0471         |                |                  | <b>171.0764</b> | 86.0418          | T    | 1145.5909        | 573.2991        | <b>1128.5644</b> | 564.7858         | 1127.5804        | 564.2938         | 10 |
| 3  | 102.0550        | 318.1296        | 159.5684        |                |                  | <b>300.1190</b> | 150.5631         | E    | <b>1044.5432</b> | 522.7753        | 1027.5167        | 514.2620         | <b>1026.5327</b> | 513.7700         | 9  |
| 4  | 60.0444         | 405.1616        | <b>203.0844</b> |                |                  | <b>387.1510</b> | 194.0792         | S    | <b>915.5007</b>  | 458.2540        | <b>898.4741</b>  | 449.7407         | <b>897.4901</b>  | 449.2487         | 8  |
| 5  | 86.0964         | <b>518.2457</b> | 259.6265        |                |                  | 500.2351        | 250.6212         | L    | <b>828.4686</b>  | 414.7380        | <b>811.4421</b>  | <b>406.2247</b>  |                  |                  | 7  |
| 6  | 101.0709        | 646.3042        | 323.6558        | 629.2777       | 315.1425         | 628.2937        | 314.6505         | Q    | <b>715.3846</b>  | 358.1959        | <b>698.3580</b>  | 349.6826         |                  |                  | 6  |
| 7  | 44.0495         | 717.3414        | 359.1743        | 700.3148       | 350.6610         | 699.3308        | 350.1690         | A    | <b>587.3260</b>  | 294.1666        | 570.2994         | 285.6534         |                  |                  | 5  |
| 8  | 87.0553         | 831.3843        | 416.1958        | 814.3577       | 407.6825         | 813.3737        | 407.1905         | N    | <b>516.2889</b>  | 258.6481        | <b>499.2623</b>  | 250.1348         |                  |                  | 4  |
| 9  | 72.0808         | <b>930.4527</b> | 465.7300        | 913.4262       | 457.2167         | 912.4421        | 456.7247         | V    | <b>402.2459</b>  | 201.6266        | 385.2194         | 193.1133         |                  |                  | 3  |
| 10 | 101.0709        | 1058.5113       | 529.7593        | 1041.4847      | 521.2460         | 1040.5007       | 520.7540         | Q    | <b>303.1775</b>  | 152.0924        | 286.1510         | 143.5791         |                  |                  | 2  |
| 11 | <b>129.1135</b> |                 |                 |                |                  |                 |                  | R    | <b>175.1190</b>  | 88.0631         | 158.0924         | 79.5498          |                  |                  | 1  |

MS/MS Fragmentation of **VIMVGSGGVGK**

Found in **P11234**, P11234|RALB\_HUMAN Ras-related protein Ral-B OS=Homo sapiens GN=RALB PE=1 SV=1

Match to Query 219: 1018.492938 from(510.253745,2+)

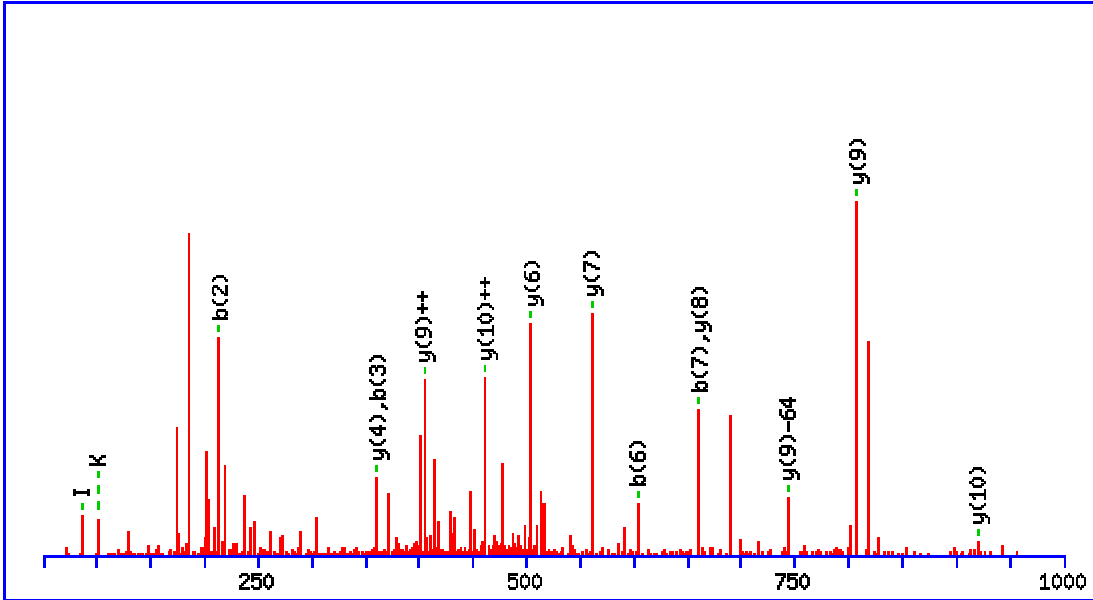

**Monoisotopic mass of neutral peptide Mr(calc):** 1018.5481

**Fixed modifications:** Carbamidomethyl (C)

**Variable modifications:**

**M3** : Oxidation (M), with neutral losses 0.0000(shown in table), 63.9983

**Ions Score:** 42 **Expect:** 0.0056

**Matches (Bold Red):** 15/130 fragment ions using 23 most intense peaks

| #  | Immon.          | b               | b <sup>++</sup> | b <sup>0</sup> | b <sup>0++</sup> | Seq. | y               | y <sup>++</sup> | y <sup>*</sup> | y <sup>*++</sup> | y <sup>0</sup> | y <sup>0++</sup> | #  |
|----|-----------------|-----------------|-----------------|----------------|------------------|------|-----------------|-----------------|----------------|------------------|----------------|------------------|----|
| 1  | 72.0808         | 100.0757        | 50.5415         |                |                  | V    |                 |                 |                |                  |                |                  | 11 |
| 2  | <b>86.0964</b>  | <b>213.1598</b> | 107.0835        |                |                  | I    | <b>920.4870</b> | <b>460.7471</b> | 903.4604       | 452.2339         | 902.4764       | 451.7418         | 10 |
| 3  | 120.0478        | <b>360.1952</b> | 180.6012        |                |                  | M    | <b>807.4029</b> | <b>404.2051</b> | 790.3764       | 395.6918         | 789.3924       | 395.1998         | 9  |
| 4  | 72.0808         | 459.2636        | 230.1354        |                |                  | V    | <b>660.3675</b> | 330.6874        | 643.3410       | 322.1741         | 642.3570       | 321.6821         | 8  |
| 5  | 30.0338         | 516.2850        | 258.6462        |                |                  | G    | <b>561.2991</b> | 281.1532        | 544.2726       | 272.6399         | 543.2885       | 272.1479         | 7  |
| 6  | 60.0444         | <b>603.3171</b> | 302.1622        | 585.3065       | 293.1569         | S    | <b>504.2776</b> | 252.6425        | 487.2511       | 244.1292         | 486.2671       | 243.6372         | 6  |
| 7  | 30.0338         | <b>660.3385</b> | 330.6729        | 642.3280       | 321.6676         | G    | 417.2456        | 209.1264        | 400.2191       | 200.6132         |                |                  | 5  |
| 8  | 30.0338         | 717.3600        | 359.1836        | 699.3494       | 350.1784         | G    | <b>360.2241</b> | 180.6157        | 343.1976       | 172.1024         |                |                  | 4  |
| 9  | 72.0808         | 816.4284        | 408.7178        | 798.4178       | 399.7126         | V    | 303.2027        | 152.1050        | 286.1761       | 143.5917         |                |                  | 3  |
| 10 | 30.0338         | 873.4499        | 437.2286        | 855.4393       | 428.2233         | G    | 204.1343        | 102.5708        | 187.1077       | 94.0575          |                |                  | 2  |
| 11 | <b>101.1073</b> |                 |                 |                |                  | K    | 147.1128        | 74.0600         | 130.0863       | 65.5468          |                |                  | 1  |

Ras-related protein Ral-B (P11234): single-peptide based protein identification could possibly also be assigned to RALA\_HUMAN Ras-related protein Ral-A precursor (P11233)

MS/MS Fragmentation of **LVVLGSGGVGK**

Found in **P61224**, P61224|RAP1B\_HUMAN Ras-related protein Rap-1b OS=Homo sapiens GN=RAP1B PE=1 SV=1

Match to Query 349: 984.634244 from(493.324398,2+)

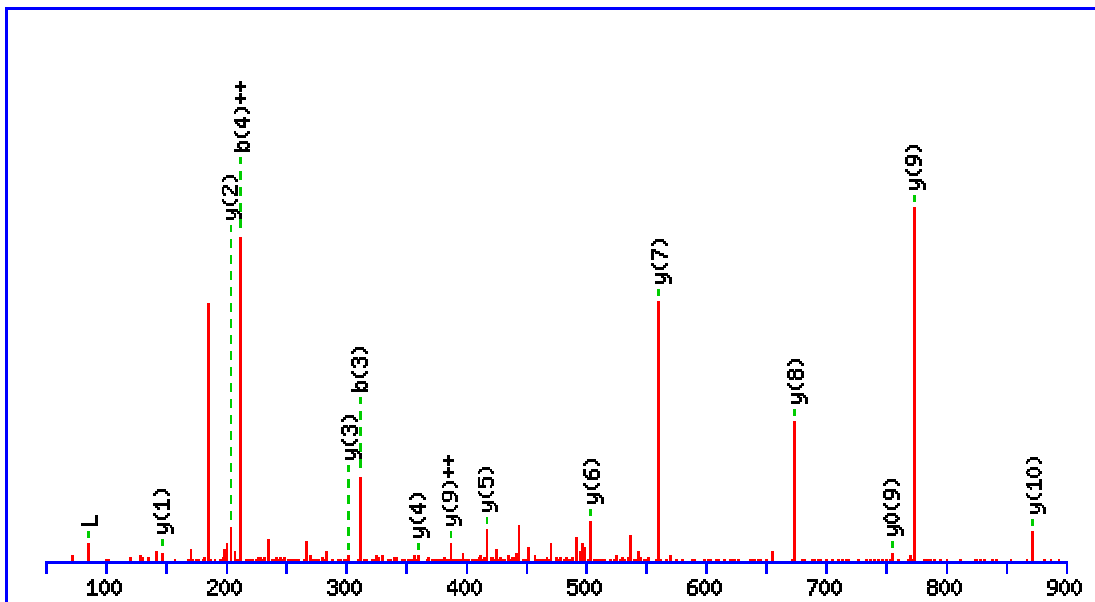

**Monoisotopic mass of neutral peptide Mr(calc):** 984.5968

**Fixed modifications:** Carbamidomethyl (C)

**Ions Score:** 66 **Expect:** 2e-005

**Matches (Bold Red):** 17/91 fragment ions using 38 most intense peaks

| #  | Immon.         | b               | b <sup>++</sup> | b <sup>0</sup> | b <sup>0++</sup> | Seq. | y               | y <sup>++</sup> | y <sup>*</sup> | y <sup>*++</sup> | y <sup>0</sup>  | y <sup>0++</sup> | #  |
|----|----------------|-----------------|-----------------|----------------|------------------|------|-----------------|-----------------|----------------|------------------|-----------------|------------------|----|
| 1  | <b>86.0964</b> | 114.0913        | 57.5493         |                |                  | L    |                 |                 |                |                  |                 |                  | 11 |
| 2  | 72.0808        | <b>213.1598</b> | 107.0835        |                |                  | V    | <b>872.5200</b> | 436.7636        | 855.4934       | 428.2504         | 854.5094        | 427.7584         | 10 |
| 3  | 72.0808        | <b>312.2282</b> | 156.6177        |                |                  | V    | <b>773.4516</b> | <b>387.2294</b> | 756.4250       | 378.7162         | <b>755.4410</b> | 378.2241         | 9  |
| 4  | <b>86.0964</b> | 425.3122        | <b>213.1598</b> |                |                  | L    | <b>674.3832</b> | 337.6952        | 657.3566       | 329.1819         | 656.3726        | 328.6899         | 8  |
| 5  | 30.0338        | 482.3337        | 241.6705        |                |                  | G    | <b>561.2991</b> | 281.1532        | 544.2726       | 272.6399         | 543.2885        | 272.1479         | 7  |
| 6  | 60.0444        | 569.3657        | 285.1865        | 551.3552       | 276.1812         | S    | <b>504.2776</b> | 252.6425        | 487.2511       | 244.1292         | 486.2671        | 243.6372         | 6  |
| 7  | 30.0338        | 626.3872        | 313.6972        | 608.3766       | 304.6919         | G    | <b>417.2456</b> | 209.1264        | 400.2191       | 200.6132         |                 |                  | 5  |
| 8  | 30.0338        | 683.4087        | 342.2080        | 665.3981       | 333.2027         | G    | <b>360.2241</b> | 180.6157        | 343.1976       | 172.1024         |                 |                  | 4  |
| 9  | 72.0808        | 782.4771        | 391.7422        | 764.4665       | 382.7369         | V    | <b>303.2027</b> | 152.1050        | 286.1761       | 143.5917         |                 |                  | 3  |
| 10 | 30.0338        | 839.4985        | 420.2529        | 821.4880       | 411.2476         | G    | <b>204.1343</b> | 102.5708        | 187.1077       | 94.0575          |                 |                  | 2  |
| 11 | 101.1073       |                 |                 |                |                  | K    | <b>147.1128</b> | 74.0600         | 130.0863       | 65.5468          |                 |                  | 1  |

Ras-related protein Rap-1b (P61224): single-peptide based protein identification could possibly also be assigned to RAP1A\_HUMAN Ras-related protein Rap-1A precursor (P62834)

MS/MS Fragmentation of **FDENAVVR**

Found in **Q3B8N2**, Q3B8N2|LEG9B\_HUMAN Galectin-9B OS=Homo sapiens GN=LGALS9B PE=2 SV=3

Match to Query 140: 948.545162 from(475.279857,2+)

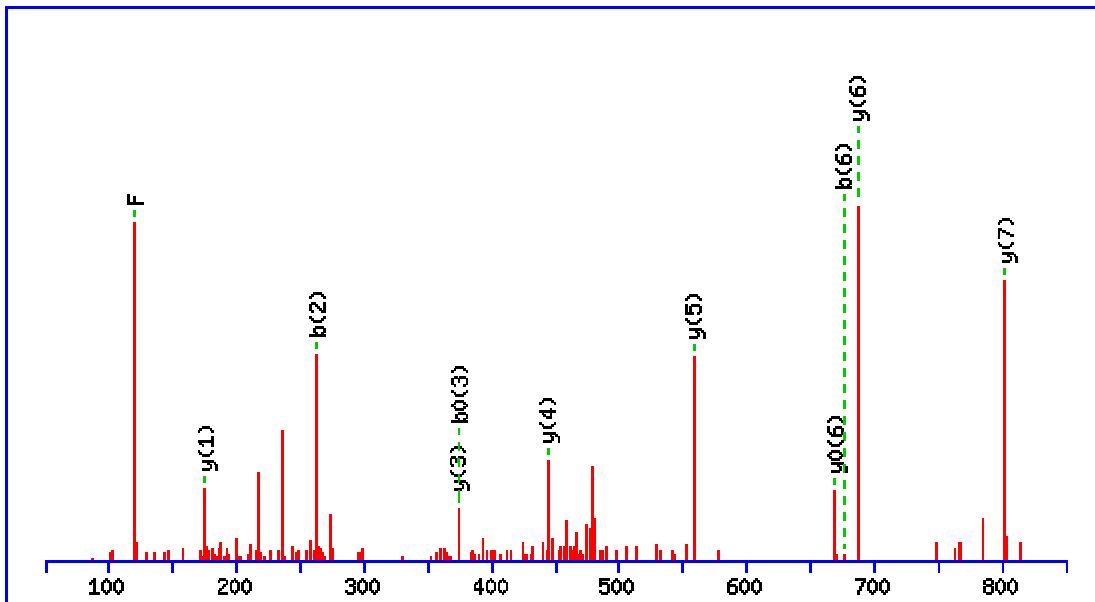

Monoisotopic mass of neutral peptide  $M_r(\text{calc})$ : 948.4665

Fixed modifications: Carbamidomethyl (C)

Ions Score: 49 Expect: 0.0011

Matches (Bold Red): 11/74 fragment ions using 21 most intense peaks

| # | Immon.          | b               | b <sup>++</sup> | b*       | b <sup>*++</sup> | b <sup>0</sup>  | b <sup>0++</sup> | Seq. | y               | y <sup>++</sup> | y*       | y <sup>*++</sup> | y <sup>0</sup>  | y <sup>0++</sup> | # |
|---|-----------------|-----------------|-----------------|----------|------------------|-----------------|------------------|------|-----------------|-----------------|----------|------------------|-----------------|------------------|---|
| 1 | <b>120.0808</b> | 148.0757        | 74.5415         |          |                  |                 |                  | F    |                 |                 |          |                  |                 |                  | 8 |
| 2 | 88.0393         | <b>263.1026</b> | 132.0550        |          |                  | 245.0921        | 123.0497         | D    | <b>802.4054</b> | 401.7063        | 785.3788 | 393.1930         | 784.3948        | 392.7010         | 7 |
| 3 | 102.0550        | 392.1452        | 196.5763        |          |                  | <b>374.1347</b> | 187.5710         | E    | <b>687.3784</b> | 344.1928        | 670.3519 | 335.6796         | <b>669.3678</b> | 335.1876         | 6 |
| 4 | 87.0553         | 506.1882        | 253.5977        | 489.1616 | 245.0844         | 488.1776        | 244.5924         | N    | <b>558.3358</b> | 279.6715        | 541.3093 | 271.1583         |                 |                  | 5 |
| 5 | 44.0495         | 577.2253        | 289.1163        | 560.1987 | 280.6030         | 559.2147        | 280.1110         | A    | <b>444.2929</b> | 222.6501        | 427.2663 | 214.1368         |                 |                  | 4 |
| 6 | 72.0808         | <b>676.2937</b> | 338.6505        | 659.2671 | 330.1372         | 658.2831        | 329.6452         | V    | <b>373.2558</b> | 187.1315        | 356.2292 | 178.6183         |                 |                  | 3 |
| 7 | 72.0808         | 775.3621        | 388.1847        | 758.3355 | 379.6714         | 757.3515        | 379.1794         | V    | 274.1874        | 137.5973        | 257.1608 | 129.0840         |                 |                  | 2 |
| 8 | 129.1135        |                 |                 |          |                  |                 |                  | R    | <b>175.1190</b> | 88.0631         | 158.0924 | 79.5498          |                 |                  | 1 |

Galectin-9B (Q3B8N2): single-peptide based protein identification could possibly also be assigned to LEG9C\_HUMAN Galectin-9C (Galectin-9-like protein B) (Q6DKI2)

MS/MS Fragmentation of **VVLIGDSGVGK**

Found in **Q15907**, Q15907|RB11B\_HUMAN Ras-related protein Rab-11B OS=Homo sapiens GN=RAB11B PE=1 SV=4

Match to Query 298: 1042.564002 from(522.289277,2+)

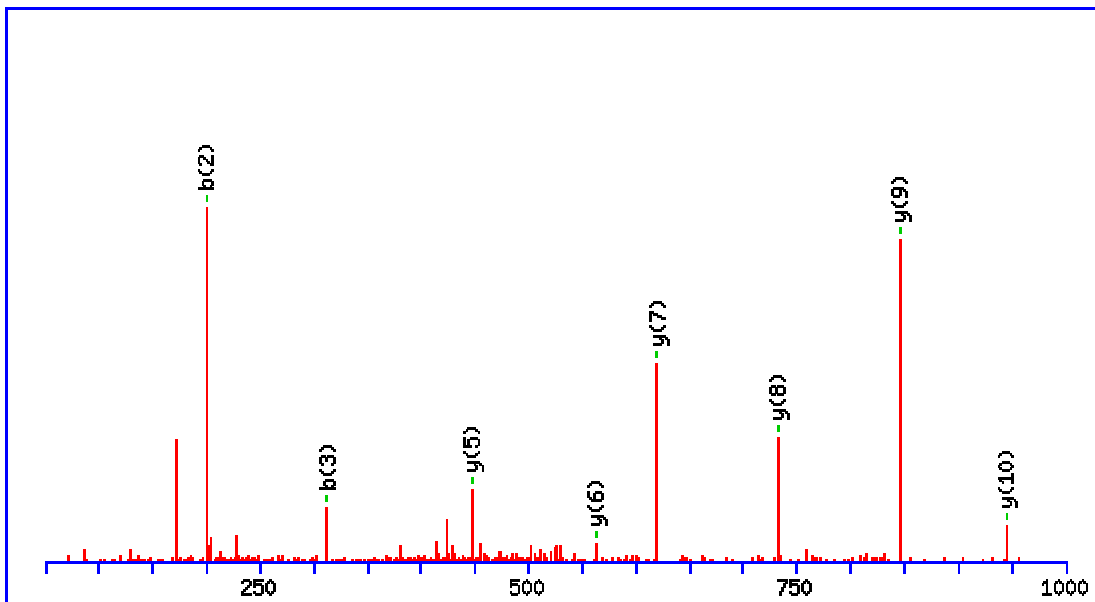

**Monoisotopic mass of neutral peptide Mr(calc):** 1042.6023

**Fixed modifications:** Carbamidomethyl (C)

**Ions Score:** 57 **Expect:** 0.00015

**Matches (Bold Red):** 8/93 fragment ions using 10 most intense peaks

| #  | Immon.   | b               | b <sup>++</sup> | b <sup>0</sup> | b <sup>0++</sup> | Seq. | y               | y <sup>++</sup> | y <sup>*</sup> | y <sup>*++</sup> | y <sup>0</sup> | y <sup>0++</sup> | #  |
|----|----------|-----------------|-----------------|----------------|------------------|------|-----------------|-----------------|----------------|------------------|----------------|------------------|----|
| 1  | 72.0808  | 100.0757        | 50.5415         |                |                  | V    |                 |                 |                |                  |                |                  | 11 |
| 2  | 72.0808  | <b>199.1441</b> | 100.0757        |                |                  | V    | <b>944.5411</b> | 472.7742        | 927.5146       | 464.2609         | 926.5306       | 463.7689         | 10 |
| 3  | 86.0964  | <b>312.2282</b> | 156.6177        |                |                  | L    | <b>845.4727</b> | 423.2400        | 828.4462       | 414.7267         | 827.4621       | 414.2347         | 9  |
| 4  | 86.0964  | 425.3122        | 213.1598        |                |                  | I    | <b>732.3886</b> | 366.6980        | 715.3621       | 358.1847         | 714.3781       | 357.6927         | 8  |
| 5  | 30.0338  | 482.3337        | 241.6705        |                |                  | G    | <b>619.3046</b> | 310.1559        | 602.2780       | 301.6427         | 601.2940       | 301.1506         | 7  |
| 6  | 88.0393  | 597.3606        | 299.1840        | 579.3501       | 290.1787         | D    | <b>562.2831</b> | 281.6452        | 545.2566       | 273.1319         | 544.2726       | 272.6399         | 6  |
| 7  | 60.0444  | 684.3927        | 342.7000        | 666.3821       | 333.6947         | S    | <b>447.2562</b> | 224.1317        | 430.2296       | 215.6185         | 429.2456       | 215.1264         | 5  |
| 8  | 30.0338  | 741.4141        | 371.2107        | 723.4036       | 362.2054         | G    | 360.2241        | 180.6157        | 343.1976       | 172.1024         |                |                  | 4  |
| 9  | 72.0808  | 840.4825        | 420.7449        | 822.4720       | 411.7396         | V    | 303.2027        | 152.1050        | 286.1761       | 143.5917         |                |                  | 3  |
| 10 | 30.0338  | 897.5040        | 449.2556        | 879.4934       | 440.2504         | G    | 204.1343        | 102.5708        | 187.1077       | 94.0575          |                |                  | 2  |
| 11 | 101.1073 |                 |                 |                |                  | K    | 147.1128        | 74.0600         | 130.0863       | 65.5468          |                |                  | 1  |

Ras-related protein Rab-11B (Q15907): single-peptide based protein identification could possibly also be assigned to RB11A\_HUMAN Ras-related protein Rab-11A (Rab-11) (P62491)



MS/MS Fragmentation of **MNLSAIQDR**

Found in **Q9NVJ2**, Q9NVJ2|ARL8B\_HUMAN ADP-ribosylation factor-like protein 8B OS=Homo sapiens  
 GN=ARL8B PE=1 SV=1

Match to Query 102: 1062.333098 from(532.173825,2+)

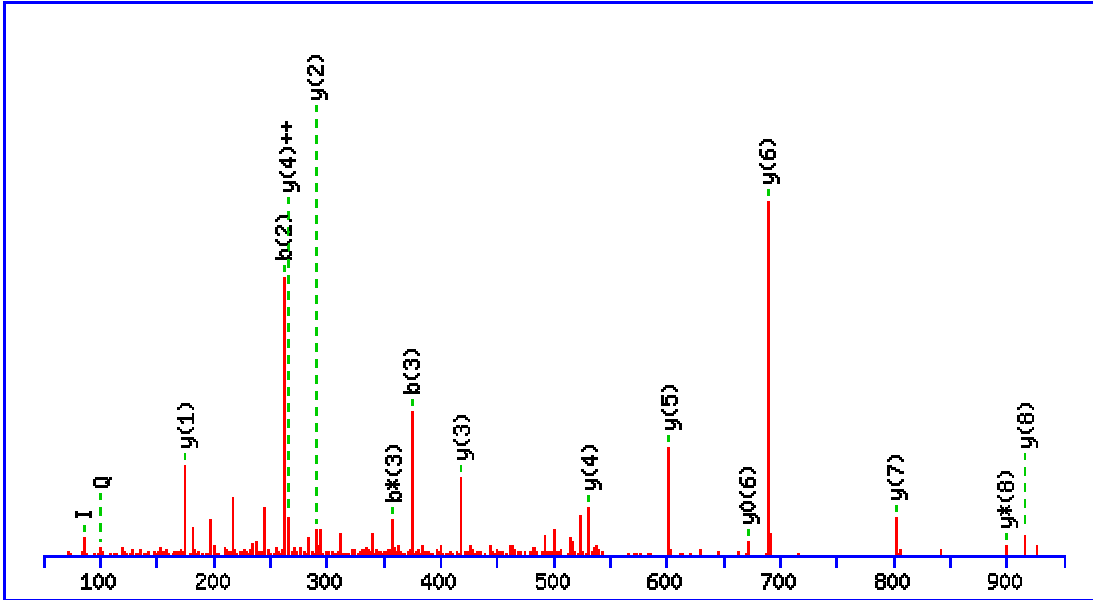

Monoisotopic mass of neutral peptide  $M_r(\text{calc})$ : 1062.5128

Fixed modifications: Carbamidomethyl (C)

Variable modifications:

M1 : Oxidation (M), with neutral losses 0.0000 (shown in table), 63.9983

Ions Score: 84 Expect: 2.7e-007

Matches (Bold Red): 17/136 fragment ions using 20 most intense peaks

| # | Immon.          | b               | b <sup>++</sup> | b*              | b <sup>***</sup> | b <sup>0</sup> | b <sup>0++</sup> | Seq. | y               | y <sup>++</sup> | y*              | y <sup>***</sup> | y <sup>0</sup>  | y <sup>0++</sup> | # |
|---|-----------------|-----------------|-----------------|-----------------|------------------|----------------|------------------|------|-----------------|-----------------|-----------------|------------------|-----------------|------------------|---|
| 1 | 120.0478        | 148.0427        | 74.5250         |                 |                  |                |                  | M    |                 |                 |                 |                  |                 |                  | 9 |
| 2 | 87.0553         | <b>262.0856</b> | 131.5464        | 245.0591        | 123.0332         |                |                  | N    | <b>916.4847</b> | 458.7460        | <b>899.4581</b> | 450.2327         | 898.4741        | 449.7407         | 8 |
| 3 | <b>86.0964</b>  | <b>375.1697</b> | 188.0885        | <b>358.1431</b> | 179.5752         |                |                  | L    | <b>802.4417</b> | 401.7245        | 785.4152        | 393.2112         | 784.4312        | 392.7192         | 7 |
| 4 | 60.0444         | 462.2017        | 231.6045        | 445.1752        | 223.0912         | 444.1911       | 222.5992         | S    | <b>689.3577</b> | 345.1825        | 672.3311        | 336.6692         | <b>671.3471</b> | 336.1772         | 6 |
| 5 | 44.0495         | 533.2388        | 267.1230        | 516.2123        | 258.6098         | 515.2282       | 258.1178         | A    | <b>602.3257</b> | 301.6665        | 585.2991        | 293.1532         | 584.3151        | 292.6612         | 5 |
| 6 | <b>86.0964</b>  | 646.3229        | 323.6651        | 629.2963        | 315.1518         | 628.3123       | 314.6598         | I    | <b>531.2885</b> | <b>266.1479</b> | 514.2620        | 257.6346         | 513.2780        | 257.1426         | 4 |
| 7 | <b>101.0709</b> | 774.3815        | 387.6944        | 757.3549        | 379.1811         | 756.3709       | 378.6891         | Q    | <b>418.2045</b> | 209.6059        | 401.1779        | 201.0926         | 400.1939        | 200.6006         | 3 |
| 8 | 88.0393         | 889.4084        | 445.2078        | 872.3818        | 436.6946         | 871.3978       | 436.2026         | D    | <b>290.1459</b> | 145.5766        | 273.1193        | 137.0633         | 272.1353        | 136.5713         | 2 |
| 9 | 129.1135        |                 |                 |                 |                  |                |                  | R    | <b>175.1190</b> | 88.0631         | 158.0924        | 79.5498          |                 |                  | 1 |

ADP-ribosylation factor-like protein 8B (Q9NVJ2): single-peptide based protein identification could possibly also be assigned to ARL8A\_HUMAN ADP-ribosylation factor-like protein 8A (Q96BM9)

MS/MS Fragmentation of **DLPNALDEK**

Found in **Q9NVJ2**, Q9NVJ2|ARL8B\_HUMAN ADP-ribosylation factor-like protein 8B OS=Homo sapiens  
 GN=ARL8B PE=1 SV=1

Match to Query 366: 1013.545718 from(507.780135,2+)

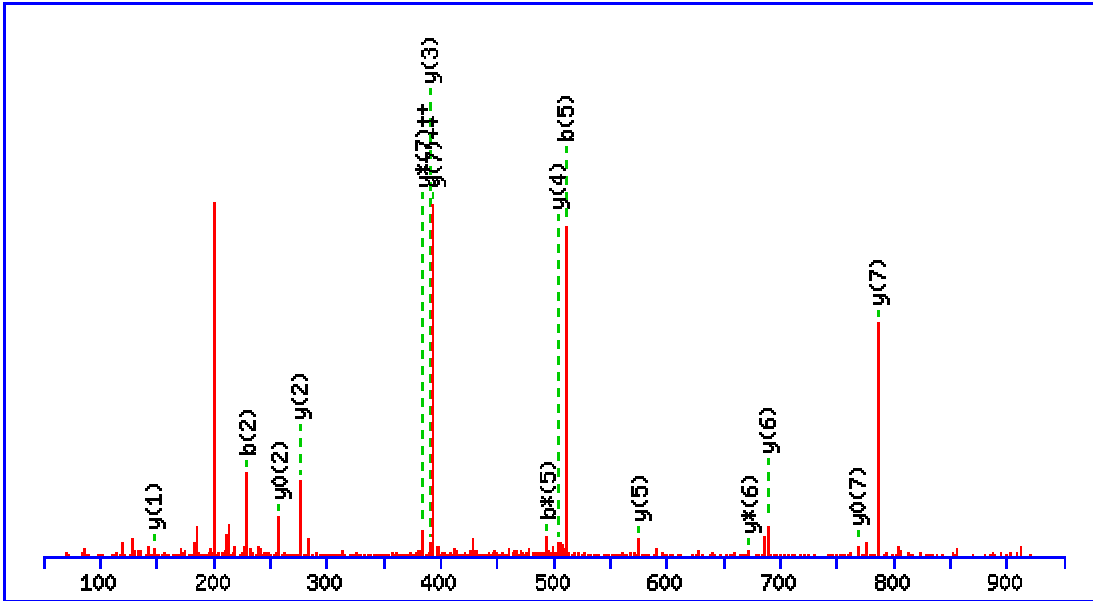

Monoisotopic mass of neutral peptide Mr(calc): 1013.5029

Fixed modifications: Carbamidomethyl (C)

Ions Score: 36 Expect: 0.02

Matches (Bold Red): 15/97 fragment ions using 41 most intense peaks

| # | Immon.   | b               | b <sup>++</sup> | b*              | b <sup>*++</sup> | b <sup>0</sup> | b <sup>0++</sup> | Seq. | y               | y <sup>++</sup> | y*              | y <sup>*++</sup> | y <sup>0</sup>  | y <sup>0++</sup> | # |
|---|----------|-----------------|-----------------|-----------------|------------------|----------------|------------------|------|-----------------|-----------------|-----------------|------------------|-----------------|------------------|---|
| 1 | 88.0393  | 116.0342        | 58.5207         |                 |                  | 98.0237        | 49.5155          | D    |                 |                 |                 |                  |                 |                  | 9 |
| 2 | 86.0964  | <b>229.1183</b> | 115.0628        |                 |                  | 211.1077       | 106.0575         | L    | 899.4833        | 450.2453        | 882.4567        | 441.7320         | 881.4727        | 441.2400         | 8 |
| 3 | 70.0651  | 326.1710        | 163.5892        |                 |                  | 308.1605       | 154.5839         | P    | <b>786.3992</b> | <b>393.7032</b> | 769.3727        | <b>385.1900</b>  | <b>768.3886</b> | 384.6980         | 7 |
| 4 | 87.0553  | 440.2140        | 220.6106        | 423.1874        | 212.0974         | 422.2034       | 211.6053         | N    | <b>689.3464</b> | 345.1769        | <b>672.3199</b> | 336.6636         | 671.3359        | 336.1716         | 6 |
| 5 | 44.0495  | <b>511.2511</b> | 256.1292        | <b>494.2245</b> | 247.6159         | 493.2405       | 247.1239         | A    | <b>575.3035</b> | 288.1554        | 558.2770        | 279.6421         | 557.2930        | 279.1501         | 5 |
| 6 | 86.0964  | 624.3352        | 312.6712        | 607.3086        | 304.1579         | 606.3246       | 303.6659         | L    | <b>504.2664</b> | 252.6368        | 487.2399        | 244.1236         | 486.2558        | 243.6316         | 4 |
| 7 | 88.0393  | 739.3621        | 370.1847        | 722.3355        | 361.6714         | 721.3515       | 361.1794         | D    | <b>391.1823</b> | 196.0948        | 374.1558        | 187.5815         | 373.1718        | 187.0895         | 3 |
| 8 | 102.0550 | 868.4047        | 434.7060        | 851.3781        | 426.1927         | 850.3941       | 425.7007         | E    | <b>276.1554</b> | 138.5813        | 259.1288        | 130.0681         | <b>258.1448</b> | 129.5761         | 2 |
| 9 | 101.1073 |                 |                 |                 |                  |                |                  | K    | <b>147.1128</b> | 74.0600         | 130.0863        | 65.5468          |                 |                  | 1 |

MS/MS Fragmentation of **IVNSAQTGSEFK**

Found in **O75964**, O75964|ATP5L\_HUMAN ATP synthase subunit g, mitochondrial OS=Homo sapiens  
 GN=ATP5L PE=1 SV=3

Match to Query 153: 1150.445704 from(576.230128,2+)

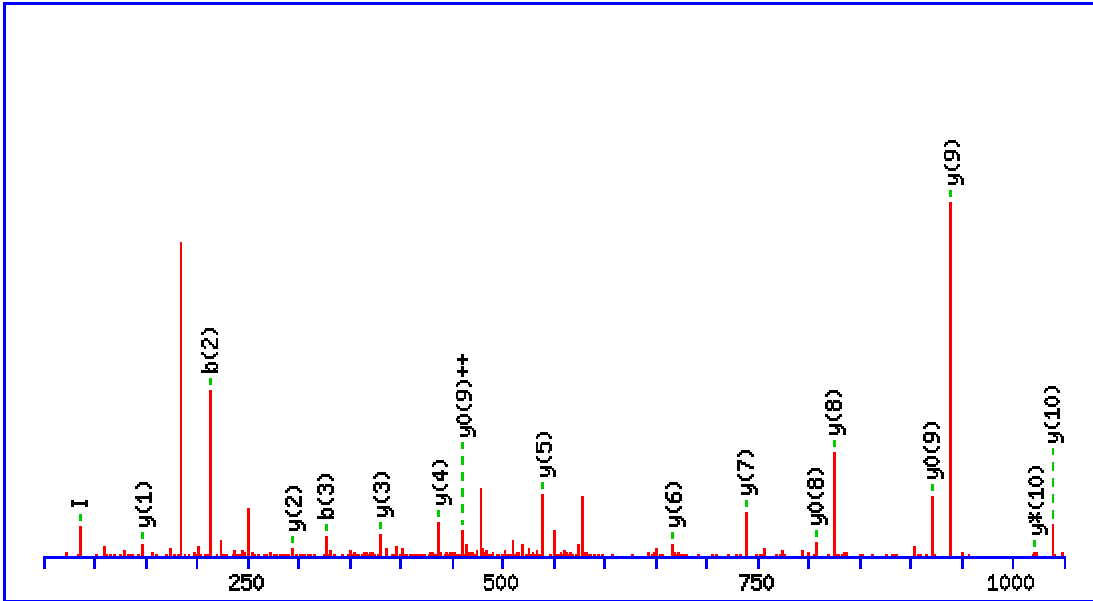

**Monoisotopic mass of neutral peptide Mr(calc):** 1150.5982

**Fixed modifications:** Carbamidomethyl (C)

**Ions Score:** 88 **Expect:** 1.1e-007

**Matches (Bold Red):** 17/117 fragment ions using 33 most intense peaks

| #  | Immon.         | b               | b <sup>++</sup> | b <sup>*</sup> | b <sup>*++</sup> | b <sup>0</sup> | b <sup>0++</sup> | Seq. | y                | y <sup>++</sup> | y <sup>*</sup>   | y <sup>*++</sup> | y <sup>0</sup>  | y <sup>0++</sup> | #  |
|----|----------------|-----------------|-----------------|----------------|------------------|----------------|------------------|------|------------------|-----------------|------------------|------------------|-----------------|------------------|----|
| 1  | <b>86.0964</b> | 114.0913        | 57.5493         |                |                  |                |                  | I    |                  |                 |                  |                  |                 |                  | 11 |
| 2  | 72.0808        | <b>213.1598</b> | 107.0835        |                |                  |                |                  | V    | <b>1038.5215</b> | 519.7644        | <b>1021.4949</b> | 511.2511         | 1020.5109       | 510.7591         | 10 |
| 3  | 87.0553        | <b>327.2027</b> | 164.1050        | 310.1761       | 155.5917         |                |                  | N    | <b>939.4530</b>  | 470.2302        | 922.4265         | 461.7169         | <b>921.4425</b> | <b>461.2249</b>  | 9  |
| 4  | 60.0444        | 414.2347        | 207.6210        | 397.2082       | 199.1077         | 396.2241       | 198.6157         | S    | <b>825.4101</b>  | 413.2087        | 808.3836         | 404.6954         | <b>807.3995</b> | 404.2034         | 8  |
| 5  | 44.0495        | 485.2718        | 243.1395        | 468.2453       | 234.6263         | 467.2613       | 234.1343         | A    | <b>738.3781</b>  | 369.6927        | 721.3515         | 361.1794         | 720.3675        | 360.6874         | 7  |
| 6  | 101.0709       | 613.3304        | 307.1688        | 596.3039       | 298.6556         | 595.3198       | 298.1636         | Q    | <b>667.3410</b>  | 334.1741        | 650.3144         | 325.6608         | 649.3304        | 325.1688         | 6  |
| 7  | 74.0600        | 714.3781        | 357.6927        | 697.3515       | 349.1794         | 696.3675       | 348.6874         | T    | <b>539.2824</b>  | 270.1448        | 522.2558         | 261.6316         | 521.2718        | 261.1396         | 5  |
| 8  | 30.0338        | 771.3995        | 386.2034        | 754.3730       | 377.6901         | 753.3890       | 377.1981         | G    | <b>438.2347</b>  | 219.6210        | 421.2082         | 211.1077         | 420.2241        | 210.6157         | 4  |
| 9  | 60.0444        | 858.4316        | 429.7194        | 841.4050       | 421.2061         | 840.4210       | 420.7141         | S    | <b>381.2132</b>  | 191.1103        | 364.1867         | 182.5970         | 363.2027        | 182.1050         | 3  |
| 10 | 120.0808       | 1005.5000       | 503.2536        | 988.4734       | 494.7404         | 987.4894       | 494.2483         | F    | <b>294.1812</b>  | 147.5942        | 277.1547         | 139.0810         |                 |                  | 2  |
| 11 | 101.1073       |                 |                 |                |                  |                |                  | K    | <b>147.1128</b>  | 74.0600         | 130.0863         | 65.5468          |                 |                  | 1  |

MS/MS Fragmentation of **FNTANDDNVTQVR**

Found in **P04040**, P04040|CATA\_HUMAN Catalase OS=Homo sapiens GN=CAT PE=1 SV=3

Match to Query 637: 1492.647104 from(747.330828,2+)

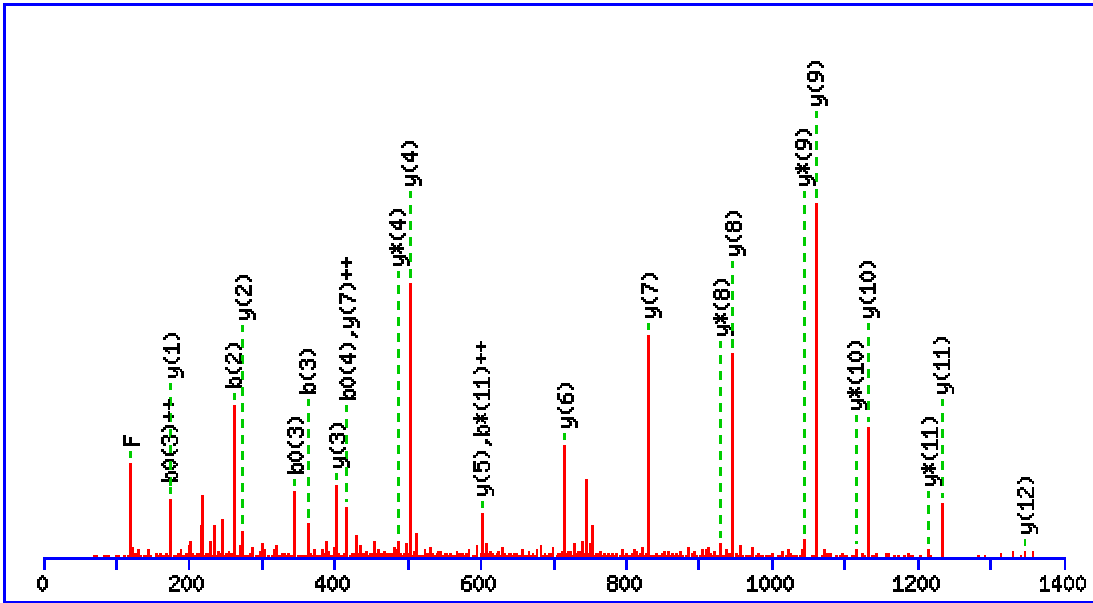

Monoisotopic mass of neutral peptide Mr(calc): 1492.6906

Fixed modifications: Carbamidomethyl (C)

Ions Score: 93 Expect: 3.7e-008

Matches (Bold Red): 25/145 fragment ions using 44 most intense peaks

| #  | Immon.          | b               | b <sup>++</sup> | b <sup>*</sup> | b <sup>*++</sup> | b <sup>0</sup>  | b <sup>0++</sup> | Seq. | y                | y <sup>++</sup> | y <sup>*</sup>   | y <sup>*++</sup> | y <sup>0</sup> | y <sup>0++</sup> | #  |
|----|-----------------|-----------------|-----------------|----------------|------------------|-----------------|------------------|------|------------------|-----------------|------------------|------------------|----------------|------------------|----|
| 1  | <b>120.0808</b> | 148.0757        | 74.5415         |                |                  |                 |                  | F    |                  |                 |                  |                  |                |                  | 13 |
| 2  | 87.0553         | <b>262.1186</b> | 131.5629        | 245.0921       | 123.0497         |                 |                  | N    | <b>1346.6295</b> | 673.8184        | 1329.6029        | 665.3051         | 1328.6189      | 664.8131         | 12 |
| 3  | 74.0600         | <b>363.1663</b> | 182.0868        | 346.1397       | 173.5735         | <b>345.1557</b> | <b>173.0815</b>  | T    | <b>1232.5866</b> | 616.7969        | <b>1215.5600</b> | 608.2836         | 1214.5760      | 607.7916         | 11 |
| 4  | 44.0495         | 434.2034        | 217.6053        | 417.1769       | 209.0921         | <b>416.1928</b> | 208.6001         | A    | <b>1131.5389</b> | 566.2731        | <b>1114.5123</b> | 557.7598         | 1113.5283      | 557.2678         | 10 |
| 5  | 87.0553         | 548.2463        | 274.6268        | 531.2198       | 266.1135         | 530.2358        | 265.6215         | N    | <b>1060.5018</b> | 530.7545        | <b>1043.4752</b> | 522.2413         | 1042.4912      | 521.7492         | 9  |
| 6  | 88.0393         | 663.2733        | 332.1403        | 646.2467       | 323.6270         | 645.2627        | 323.1350         | D    | <b>946.4588</b>  | 473.7331        | <b>929.4323</b>  | 465.2198         | 928.4483       | 464.7278         | 8  |
| 7  | 88.0393         | 778.3002        | 389.6537        | 761.2737       | 381.1405         | 760.2897        | 380.6485         | D    | <b>831.4319</b>  | <b>416.2196</b> | 814.4054         | 407.7063         | 813.4213       | 407.2143         | 7  |
| 8  | 87.0553         | 892.3431        | 446.6752        | 875.3166       | 438.1619         | 874.3326        | 437.6699         | N    | <b>716.4050</b>  | 358.7061        | 699.3784         | 350.1928         | 698.3944       | 349.7008         | 6  |
| 9  | 72.0808         | 991.4116        | 496.2094        | 974.3850       | 487.6961         | 973.4010        | 487.2041         | V    | <b>602.3620</b>  | 301.6847        | 585.3355         | 293.1714         | 584.3515       | 292.6794         | 5  |
| 10 | 74.0600         | 1092.4592       | 546.7333        | 1075.4327      | 538.2200         | 1074.4487       | 537.7280         | T    | <b>503.2936</b>  | 252.1504        | <b>486.2671</b>  | 243.6372         | 485.2831       | 243.1452         | 4  |
| 11 | 101.0709        | 1220.5178       | 610.7625        | 1203.4913      | <b>602.2493</b>  | 1202.5073       | 601.7573         | Q    | <b>402.2459</b>  | 201.6266        | 385.2194         | 193.1133         |                |                  | 3  |
| 12 | 72.0808         | 1319.5862       | 660.2968        | 1302.5597      | 651.7835         | 1301.5757       | 651.2915         | V    | <b>274.1874</b>  | 137.5973        | 257.1608         | 129.0840         |                |                  | 2  |
| 13 | 129.1135        |                 |                 |                |                  |                 |                  | R    | <b>175.1190</b>  | 88.0631         | 158.0924         | 79.5498          |                |                  | 1  |

MS/MS Fragmentation of **SGSGTMNLGGSLTR**

Found in **P47756**, P47756|CAPZB\_HUMAN F-actin-capping protein subunit beta OS=Homo sapiens  
 GN=CAPZB PE=1 SV=4

Match to Query 321: 1352.660978 from(677.337765,2+)

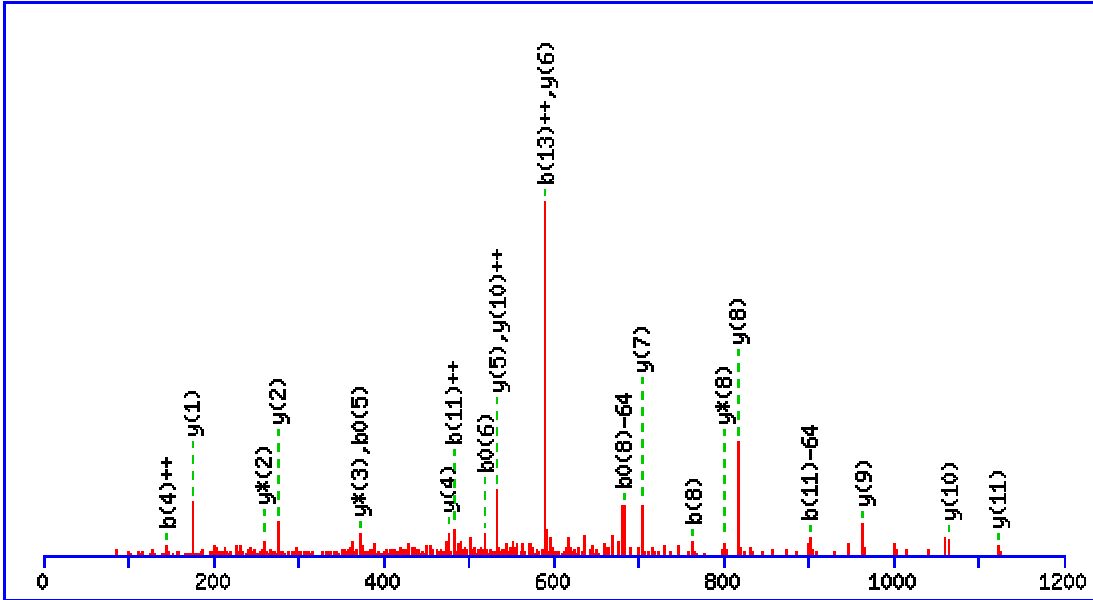

Monoisotopic mass of neutral peptide Mr(calc): 1352.6354

Fixed modifications: Carbamidomethyl (C)

Variable modifications:

M6 : Oxidation (M), with neutral losses 0.0000(shown in table), 63.9983

Ions Score: 90 Expect: 6.6e-008

Matches (Bold Red): 23/233 fragment ions using 22 most intense peaks

| #  | Immon.   | b               | b <sup>++</sup> | b <sup>*</sup> | b <sup>*++</sup> | b <sup>0</sup>  | b <sup>0++</sup> | Seq. | y                | y <sup>++</sup> | y <sup>*</sup>  | y <sup>*++</sup> | y <sup>0</sup> | y <sup>0++</sup> | #  |
|----|----------|-----------------|-----------------|----------------|------------------|-----------------|------------------|------|------------------|-----------------|-----------------|------------------|----------------|------------------|----|
| 1  | 60.0444  | 88.0393         | 44.5233         |                |                  | 70.0287         | 35.5180          | S    |                  |                 |                 |                  |                |                  | 14 |
| 2  | 30.0338  | <b>145.0608</b> | 73.0340         |                |                  | 127.0502        | 64.0287          | G    | 1266.6107        | 633.8090        | 1249.5841       | 625.2957         | 1248.6001      | 624.8037         | 13 |
| 3  | 60.0444  | 232.0928        | 116.5500        |                |                  | 214.0822        | 107.5448         | S    | 1209.5892        | 605.2982        | 1192.5627       | 596.7850         | 1191.5787      | 596.2930         | 12 |
| 4  | 30.0338  | 289.1143        | <b>145.0608</b> |                |                  | 271.1037        | 136.0555         | G    | <b>1122.5572</b> | 561.7822        | 1105.5306       | 553.2690         | 1104.5466      | 552.7769         | 11 |
| 5  | 74.0600  | 390.1619        | 195.5846        |                |                  | <b>372.1514</b> | 186.5793         | T    | <b>1065.5357</b> | <b>533.2715</b> | 1048.5092       | 524.7582         | 1047.5252      | 524.2662         | 10 |
| 6  | 120.0478 | 537.1973        | 269.1023        |                |                  | <b>519.1868</b> | 260.0970         | M    | <b>964.4880</b>  | 482.7477        | 947.4615        | 474.2344         | 946.4775       | 473.7424         | 9  |
| 7  | 87.0553  | 651.2403        | 326.1238        | 634.2137       | 317.6105         | 633.2297        | 317.1185         | N    | <b>817.4526</b>  | 409.2300        | <b>800.4261</b> | 400.7167         | 799.4421       | 400.2247         | 8  |
| 8  | 86.0964  | <b>764.3243</b> | 382.6658        | 747.2978       | 374.1525         | 746.3138        | 373.6605         | L    | <b>703.4097</b>  | 352.2085        | 686.3832        | 343.6952         | 685.3991       | 343.2032         | 7  |
| 9  | 30.0338  | 821.3458        | 411.1765        | 804.3192       | 402.6633         | 803.3352        | 402.1713         | G    | <b>590.3257</b>  | 295.6665        | 573.2991        | 287.1532         | 572.3151       | 286.6612         | 6  |
| 10 | 30.0338  | 878.3673        | 439.6873        | 861.3407       | 431.1740         | 860.3567        | 430.6820         | G    | <b>533.3042</b>  | 267.1557        | 516.2776        | 258.6425         | 515.2936       | 258.1504         | 5  |
| 11 | 60.0444  | 965.3993        | <b>483.2033</b> | 948.3727       | 474.6900         | 947.3887        | 474.1980         | S    | <b>476.2827</b>  | 238.6450        | 459.2562        | 230.1317         | 458.2722       | 229.6397         | 4  |
| 12 | 86.0964  | 1078.4834       | 539.7453        | 1061.4568      | 531.2320         | 1060.4728       | 530.7400         | L    | 389.2507         | 195.1290        | <b>372.2241</b> | 186.6157         | 371.2401       | 186.1237         | 3  |
| 13 | 74.0600  | 1179.5310       | <b>590.2692</b> | 1162.5045      | 581.7559         | 1161.5205       | 581.2639         | T    | <b>276.1666</b>  | 138.5870        | <b>259.1401</b> | 130.0737         | 258.1561       | 129.5817         | 2  |
| 14 | 129.1135 |                 |                 |                |                  |                 |                  | R    | <b>175.1190</b>  | 88.0631         | 158.0924        | 79.5498          |                |                  | 1  |

MS/MS Fragmentation of **VAEQVLNAVNK**

Found in **Q9HB40**, Q9HB40|RISC\_HUMAN Retinoid-inducible serine carboxypeptidase OS=Homo sapiens  
GN=SCPEP1 PE=1 SV=1

Match to Query 156: 1183.533408 from(592.773980,2+)

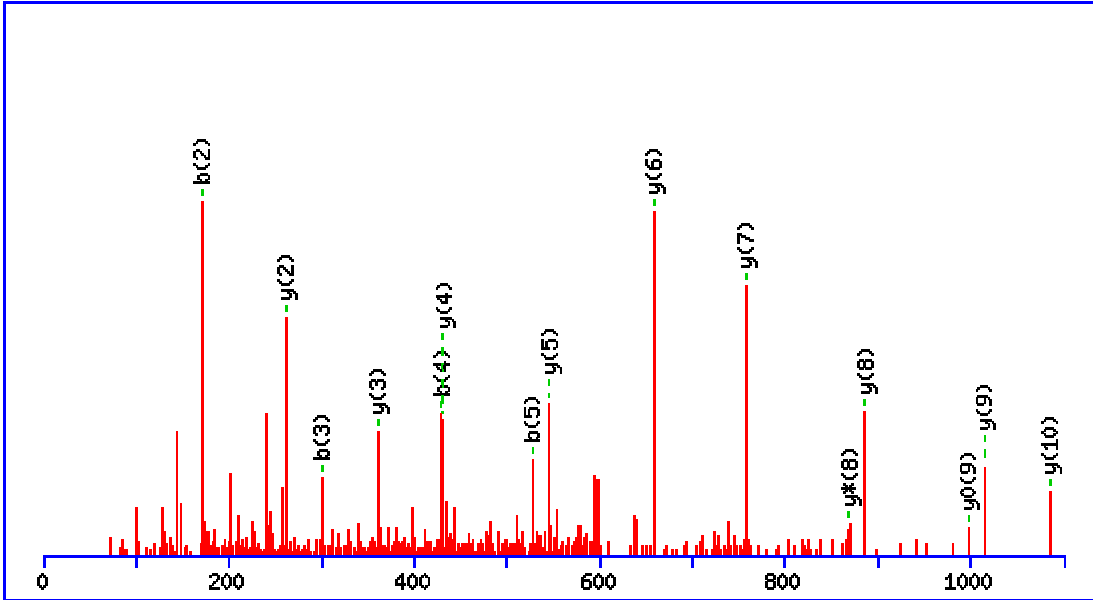

Monoisotopic mass of neutral peptide  $M_r(\text{calc})$ : 1183.6561

Fixed modifications: Carbamidomethyl (C)

Ions Score: 84 Expect: 2.7e-007

Matches (**Bold Red**): 15/105 fragment ions using 22 most intense peaks

| #  | Immon.   | b               | b <sup>++</sup> | b <sup>*</sup> | b <sup>***</sup> | b <sup>0</sup> | b <sup>0++</sup> | Seq. | y                | y <sup>++</sup> | y <sup>*</sup>  | y <sup>***</sup> | y <sup>0</sup>  | y <sup>0++</sup> | #  |
|----|----------|-----------------|-----------------|----------------|------------------|----------------|------------------|------|------------------|-----------------|-----------------|------------------|-----------------|------------------|----|
| 1  | 72.0808  | 100.0757        | 50.5415         |                |                  |                |                  | V    |                  |                 |                 |                  |                 |                  | 11 |
| 2  | 44.0495  | <b>171.1128</b> | 86.0600         |                |                  |                |                  | A    | <b>1085.5949</b> | 543.3011        | 1068.5684       | 534.7878         | 1067.5844       | 534.2958         | 10 |
| 3  | 102.0550 | <b>300.1554</b> | 150.5813        |                |                  | 282.1448       | 141.5761         | E    | <b>1014.5578</b> | 507.7826        | 997.5313        | 499.2693         | <b>996.5473</b> | 498.7773         | 9  |
| 4  | 101.0709 | <b>428.2140</b> | 214.6106        | 411.1874       | 206.0974         | 410.2034       | 205.6053         | Q    | <b>885.5152</b>  | 443.2613        | <b>868.4887</b> | 434.7480         |                 |                  | 8  |
| 5  | 72.0808  | <b>527.2824</b> | 264.1448        | 510.2558       | 255.6316         | 509.2718       | 255.1396         | V    | <b>757.4567</b>  | 379.2320        | 740.4301        | 370.7187         |                 |                  | 7  |
| 6  | 86.0964  | 640.3665        | 320.6869        | 623.3399       | 312.1736         | 622.3559       | 311.6816         | L    | <b>658.3883</b>  | 329.6978        | 641.3617        | 321.1845         |                 |                  | 6  |
| 7  | 87.0553  | 754.4094        | 377.7083        | 737.3828       | 369.1951         | 736.3988       | 368.7030         | N    | <b>545.3042</b>  | 273.1557        | 528.2776        | 264.6425         |                 |                  | 5  |
| 8  | 44.0495  | 825.4465        | 413.2269        | 808.4199       | 404.7136         | 807.4359       | 404.2216         | A    | <b>431.2613</b>  | 216.1343        | 414.2347        | 207.6210         |                 |                  | 4  |
| 9  | 72.0808  | 924.5149        | 462.7611        | 907.4884       | 454.2478         | 906.5043       | 453.7558         | V    | <b>360.2241</b>  | 180.6157        | 343.1976        | 172.1024         |                 |                  | 3  |
| 10 | 87.0553  | 1038.5578       | 519.7826        | 1021.5313      | 511.2693         | 1020.5473      | 510.7773         | N    | <b>261.1557</b>  | 131.0815        | 244.1292        | 122.5682         |                 |                  | 2  |
| 11 | 101.1073 |                 |                 |                |                  |                |                  | K    | 147.1128         | 74.0600         | 130.0863        | 65.5468          |                 |                  | 1  |

MS/MS Fragmentation of **SGTGIAAMSVMRPEQIMK**

Found in **P27449**, P27449|VATL\_HUMAN Vacuolar ATP synthase 16 kDa proteolipid subunit OS=Homo sapiens GN=ATP6VOC PE=1 SV=1

Match to Query 1004: 1953.904956 from(652.308928,3+)

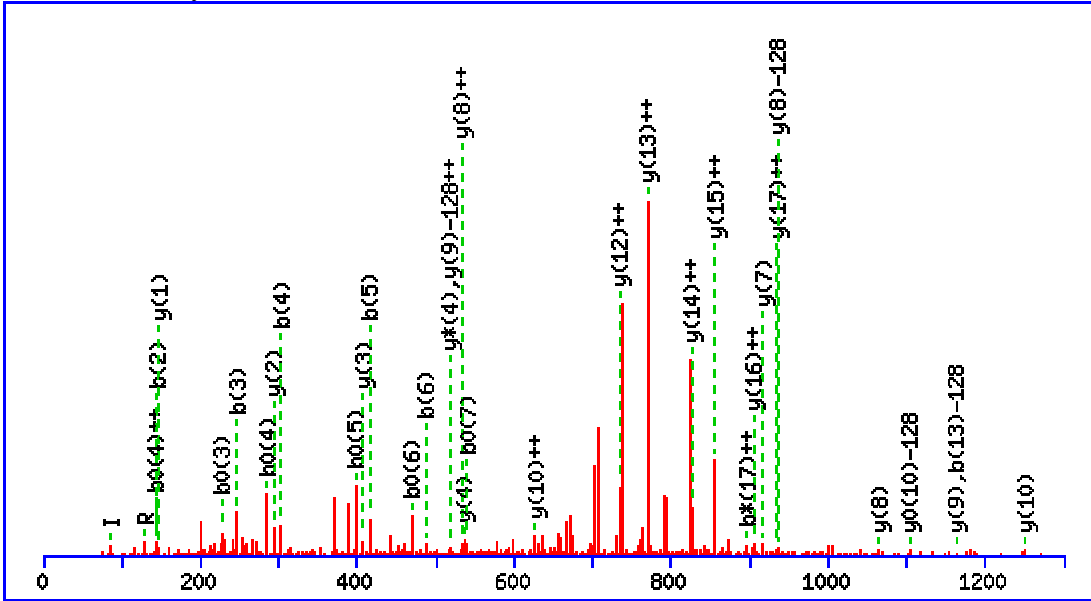

Monoisotopic mass of neutral peptide Mr(calc): 1953.9322

Fixed modifications: Carbamidomethyl (C)

Variable modifications:

M8 : Oxidation (M), with neutral losses 0.0000(shown in table), 63.9983

M11 : Oxidation (M), with neutral losses 0.0000(shown in table), 63.9983

M17 : Oxidation (M), with neutral losses 0.0000(shown in table), 63.9983

Ions Score: 46 Expect: 0.0014

Matches (Bold Red): 36/337 fragment ions using 75 most intense peaks

| #  | Immon.          | b               | b <sup>+</sup> | b <sup>*</sup> | b <sup>*+</sup> | b <sup>0</sup>  | b <sup>0+</sup> | Seq. | y                | y <sup>+</sup>  | y <sup>*</sup>  | y <sup>*+</sup> | y <sup>0</sup> | y <sup>0+</sup> | #  |
|----|-----------------|-----------------|----------------|----------------|-----------------|-----------------|-----------------|------|------------------|-----------------|-----------------|-----------------|----------------|-----------------|----|
| 1  | 60.0444         | 88.0393         | 44.5233        |                |                 | 70.0287         | 35.5180         | S    |                  |                 |                 |                 |                |                 | 18 |
| 2  | 30.0338         | <b>145.0608</b> | 73.0340        |                |                 | 127.0502        | 64.0287         | G    | 1867.9075        | <b>934.4574</b> | 1850.8809       | 925.9441        | 1849.8969      | 925.4521        | 17 |
| 3  | 74.0600         | <b>246.1084</b> | 123.5579       |                |                 | <b>228.0979</b> | 114.5526        | T    | 1810.8860        | <b>905.9466</b> | 1793.8595       | 897.4334        | 1792.8754      | 896.9414        | 16 |
| 4  | 30.0338         | <b>303.1299</b> | 152.0686       |                |                 | <b>285.1193</b> | <b>143.0633</b> | G    | 1709.8383        | <b>855.4228</b> | 1692.8118       | 846.9095        | 1691.8278      | 846.4175        | 15 |
| 5  | <b>86.0964</b>  | <b>416.2140</b> | 208.6106       |                |                 | <b>398.2034</b> | 199.6053        | I    | 1652.8169        | <b>826.9121</b> | 1635.7903       | 818.3988        | 1634.8063      | 817.9068        | 14 |
| 6  | 44.0495         | <b>487.2511</b> | 244.1292       |                |                 | <b>469.2405</b> | 235.1239        | A    | 1539.7328        | <b>770.3700</b> | 1522.7062       | 761.8568        | 1521.7222      | 761.3648        | 13 |
| 7  | 44.0495         | 558.2882        | 279.6477       |                |                 | <b>540.2776</b> | 270.6425        | A    | 1468.6957        | <b>734.8515</b> | 1451.6691       | 726.3382        | 1450.6851      | 725.8462        | 12 |
| 8  | 120.0478        | 705.3236        | 353.1654       |                |                 | 687.3130        | 344.1602        | M    | 1397.6586        | 699.3329        | 1380.6320       | 690.8196        | 1379.6480      | 690.3276        | 11 |
| 9  | 60.0444         | 792.3556        | 396.6815       |                |                 | 774.3451        | 387.6762        | S    | <b>1250.6232</b> | <b>625.8152</b> | 1233.5966       | 617.3019        | 1232.6126      | 616.8099        | 10 |
| 10 | 72.0808         | 891.4240        | 446.2157       |                |                 | 873.4135        | 437.2104        | V    | <b>1163.5911</b> | 582.2992        | 1146.5646       | 573.7859        | 1145.5806      | 573.2939        | 9  |
| 11 | 120.0478        | 1038.4595       | 519.7334       |                |                 | 1020.4489       | 510.7281        | M    | <b>1064.5227</b> | <b>532.7650</b> | 1047.4962       | 524.2517        | 1046.5122      | 523.7597        | 8  |
| 12 | <b>129.1135</b> | 1194.5606       | 597.7839       | 1177.5340      | 589.2706        | 1176.5500       | 588.7786        | R    | <b>917.4873</b>  | 459.2473        | 900.4608        | 450.7340        | 899.4768       | 450.2420        | 7  |
| 13 | 70.0651         | 1291.6133       | 646.3103       | 1274.5868      | 637.7970        | 1273.6028       | 637.3050        | P    | 761.3862         | 381.1967        | 744.3597        | 372.6835        | 743.3756       | 372.1915        | 6  |
| 14 | 102.0550        | 1420.6559       | 710.8316       | 1403.6294      | 702.3183        | 1402.6454       | 701.8263        | E    | 664.3334         | 332.6704        | 647.3069        | 324.1571        | 646.3229       | 323.6651        | 5  |
| 15 | 101.0709        | 1548.7145       | 774.8609       | 1531.6880      | 766.3476        | 1530.7039       | 765.8556        | Q    | <b>535.2909</b>  | 268.1491        | <b>518.2643</b> | 259.6358        |                |                 | 4  |
| 16 | <b>86.0964</b>  | 1661.7986       | 831.4029       | 1644.7720      | 822.8896        | 1643.7880       | 822.3976        | I    | <b>407.2323</b>  | 204.1198        | 390.2057        | 195.6065        |                |                 | 3  |
| 17 | 120.0478        | 1808.8340       | 904.9206       | 1791.8074      | <b>896.4073</b> | 1790.8234       | 895.9153        | M    | <b>294.1482</b>  | 147.5777        | 277.1217        | 139.0645        |                |                 | 2  |
| 18 | 101.1073        |                 |                |                |                 |                 |                 | K    | <b>147.1128</b>  | 74.0600         | 130.0863        | 65.5468         |                |                 | 1  |

MS/MS Fragmentation of **VLTVINQTQK**

Found in **P42766**, P42766|RL35\_HUMAN 60S ribosomal protein L35 OS=Homo sapiens GN=RPL35 PE=1 SV=2

Match to Query 159: 1142.477962 from(572.246257,2+)

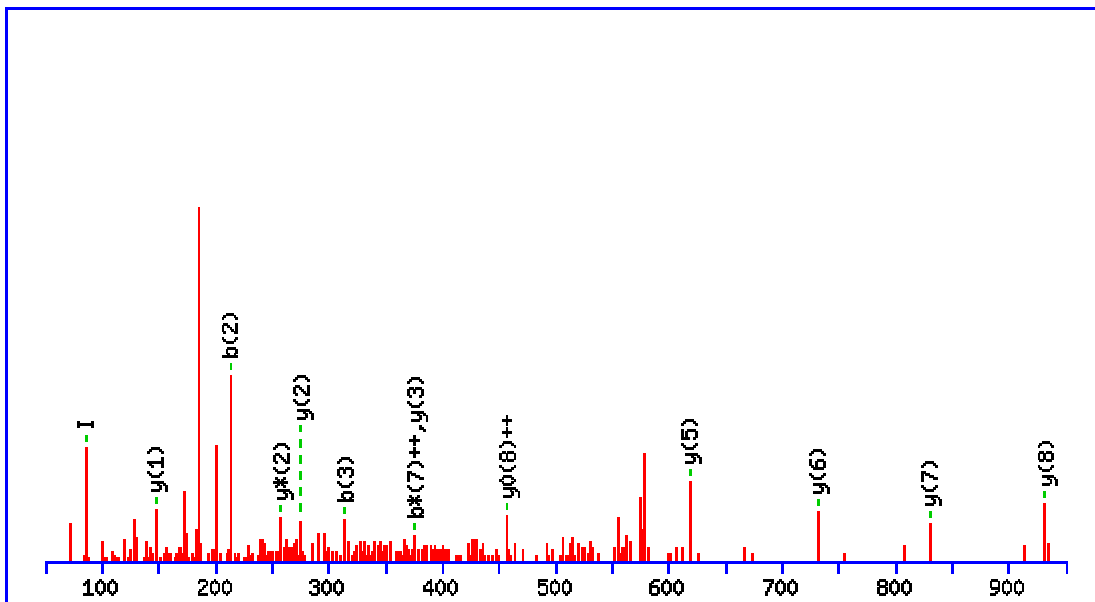

Monoisotopic mass of neutral peptide Mr(calc): 1142.6659

Fixed modifications: Carbamidomethyl (C)

Ions Score: 52 Expect: 0.00055

Matches (Bold Red): 14/100 fragment ions using 25 most intense peaks

| #  | Immon.         | b               | b <sup>++</sup> | b <sup>*</sup> | b <sup>*++</sup> | b <sup>0</sup> | b <sup>0++</sup> | Seq. | y               | y <sup>++</sup> | y <sup>*</sup>  | y <sup>*++</sup> | y <sup>0</sup> | y <sup>0++</sup> | #  |
|----|----------------|-----------------|-----------------|----------------|------------------|----------------|------------------|------|-----------------|-----------------|-----------------|------------------|----------------|------------------|----|
| 1  | 72.0808        | 100.0757        | 50.5415         |                |                  |                |                  | V    |                 |                 |                 |                  |                |                  | 10 |
| 2  | <b>86.0964</b> | <b>213.1598</b> | 107.0835        |                |                  |                |                  | L    | 1044.6048       | 522.8060        | 1027.5782       | 514.2928         | 1026.5942      | 513.8007         | 9  |
| 3  | 74.0600        | <b>314.2074</b> | 157.6074        |                |                  | 296.1969       | 148.6021         | T    | <b>931.5207</b> | 466.2640        | 914.4942        | 457.7507         | 913.5102       | <b>457.2587</b>  | 8  |
| 4  | 72.0808        | 413.2758        | 207.1416        |                |                  | 395.2653       | 198.1363         | V    | <b>830.4730</b> | 415.7402        | 813.4465        | 407.2269         | 812.4625       | 406.7349         | 7  |
| 5  | <b>86.0964</b> | 526.3599        | 263.6836        |                |                  | 508.3493       | 254.6783         | I    | <b>731.4046</b> | 366.2060        | 714.3781        | 357.6927         | 713.3941       | 357.2007         | 6  |
| 6  | 87.0553        | 640.4028        | 320.7051        | 623.3763       | 312.1918         | 622.3923       | 311.6998         | N    | <b>618.3206</b> | 309.6639        | 601.2940        | 301.1506         | 600.3100       | 300.6586         | 5  |
| 7  | 101.0709       | 768.4614        | 384.7343        | 751.4349       | <b>376.2211</b>  | 750.4509       | 375.7291         | Q    | 504.2776        | 252.6425        | 487.2511        | 244.1292         | 486.2671       | 243.6372         | 4  |
| 8  | 74.0600        | 869.5091        | 435.2582        | 852.4825       | 426.7449         | 851.4985       | 426.2529         | T    | <b>376.2191</b> | 188.6132        | 359.1925        | 180.0999         | 358.2085       | 179.6079         | 3  |
| 9  | 101.0709       | 997.5677        | 499.2875        | 980.5411       | 490.7742         | 979.5571       | 490.2822         | Q    | <b>275.1714</b> | 138.0893        | <b>258.1448</b> | 129.5761         |                |                  | 2  |
| 10 | 101.1073       |                 |                 |                |                  |                |                  | K    | <b>147.1128</b> | 74.0600         | 130.0863        | 65.5468          |                |                  | 1  |



MS/MS Fragmentation of **AVVGVVAGGGR**

Found in **P62917**, P62917|RL8\_HUMAN 60S ribosomal protein L8 OS=Homo sapiens GN=RPL8 PE=1 SV=2

Match to Query 255: 940.606620 from(471.310586,2+)

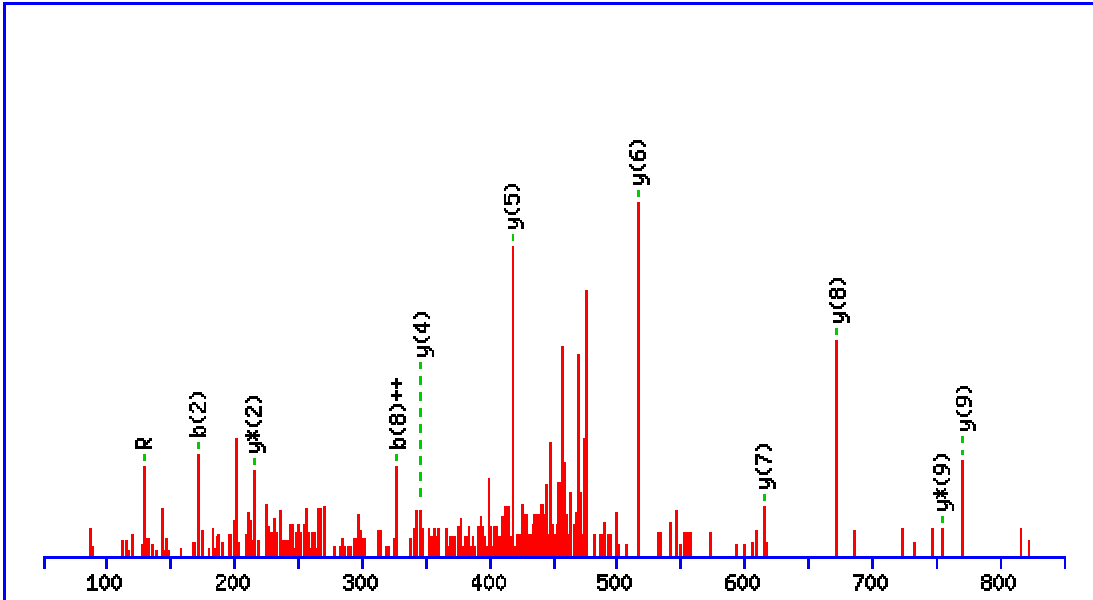

Monoisotopic mass of neutral peptide Mr(calc): 940.5454

Fixed modifications: Carbamidomethyl (C)

Ions Score: 43 Expect: 0.0033

Matches (Bold Red): 12/71 fragment ions using 20 most intense peaks

| #  | Immon.          | b               | b <sup>++</sup> | Seq.     | y               | y <sup>++</sup> | y*              | y <sup>*++</sup> | #         |
|----|-----------------|-----------------|-----------------|----------|-----------------|-----------------|-----------------|------------------|-----------|
| 1  | 44.0495         | 72.0444         | 36.5258         | <b>A</b> |                 |                 |                 |                  | <b>11</b> |
| 2  | 72.0808         | <b>171.1128</b> | 86.0600         | <b>V</b> | 870.5156        | 435.7614        | 853.4890        | 427.2482         | <b>10</b> |
| 3  | 72.0808         | 270.1812        | 135.5942        | <b>V</b> | <b>771.4472</b> | 386.2272        | <b>754.4206</b> | 377.7139         | <b>9</b>  |
| 4  | 30.0338         | <b>327.2027</b> | 164.1050        | <b>G</b> | <b>672.3788</b> | 336.6930        | 655.3522        | 328.1797         | <b>8</b>  |
| 5  | 72.0808         | 426.2711        | 213.6392        | <b>V</b> | <b>615.3573</b> | 308.1823        | 598.3307        | 299.6690         | <b>7</b>  |
| 6  | 72.0808         | 525.3395        | 263.1734        | <b>V</b> | <b>516.2889</b> | 258.6481        | 499.2623        | 250.1348         | <b>6</b>  |
| 7  | 44.0495         | 596.3766        | 298.6920        | <b>A</b> | <b>417.2205</b> | 209.1139        | 400.1939        | 200.6006         | <b>5</b>  |
| 8  | 30.0338         | 653.3981        | <b>327.2027</b> | <b>G</b> | <b>346.1833</b> | 173.5953        | 329.1568        | 165.0820         | <b>4</b>  |
| 9  | 30.0338         | 710.4196        | 355.7134        | <b>G</b> | 289.1619        | 145.0846        | 272.1353        | 136.5713         | <b>3</b>  |
| 10 | 30.0338         | 767.4410        | 384.2241        | <b>G</b> | 232.1404        | 116.5738        | <b>215.1139</b> | 108.0606         | <b>2</b>  |
| 11 | <b>129.1135</b> |                 |                 | <b>R</b> | 175.1190        | 88.0631         | 158.0924        | 79.5498          | <b>1</b>  |

MS/MS Fragmentation of **LAQLEEAK**

Found in **P24539**, P24539|AT5F1\_HUMAN ATP synthase subunit b, mitochondrial OS=Homo sapiens  
 GN=ATP5F1 PE=1 SV=2

Match to Query 108: 900.328958 from(451.171755,2+)

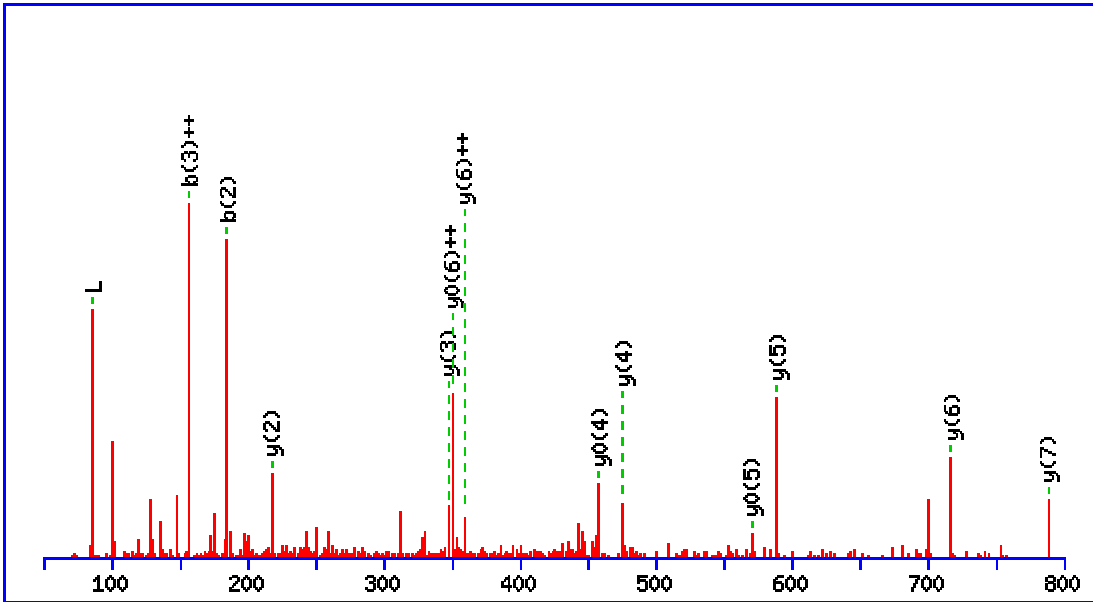

**Monoisotopic mass of neutral peptide Mr(calc):** 900.4916

**Fixed modifications:** Carbamidomethyl (C)

**Ions Score:** 52 **Expect:** 0.00063

**Matches (Bold Red):** 14/76 fragment ions using 17 most intense peaks

| # | Immon.         | b               | b <sup>++</sup> | b <sup>*</sup> | b <sup>*++</sup> | b <sup>0</sup> | b <sup>0++</sup> | Seq. | y               | y <sup>++</sup> | y <sup>*</sup> | y <sup>*++</sup> | y <sup>0</sup>  | y <sup>0++</sup> | # |
|---|----------------|-----------------|-----------------|----------------|------------------|----------------|------------------|------|-----------------|-----------------|----------------|------------------|-----------------|------------------|---|
| 1 | <b>86.0964</b> | 114.0913        | 57.5493         |                |                  |                |                  | L    |                 |                 |                |                  |                 |                  | 8 |
| 2 | 44.0495        | <b>185.1285</b> | 93.0679         |                |                  |                |                  | A    | <b>788.4149</b> | 394.7111        | 771.3883       | 386.1978         | 770.4043        | 385.7058         | 7 |
| 3 | 101.0709       | 313.1870        | <b>157.0972</b> | 296.1605       | 148.5839         |                |                  | Q    | <b>717.3777</b> | <b>359.1925</b> | 700.3512       | 350.6792         | 699.3672        | <b>350.1872</b>  | 6 |
| 4 | <b>86.0964</b> | 426.2711        | 213.6392        | 409.2445       | 205.1259         |                |                  | L    | <b>589.3192</b> | 295.1632        | 572.2926       | 286.6499         | <b>571.3086</b> | 286.1579         | 5 |
| 5 | 102.0550       | 555.3137        | 278.1605        | 538.2871       | 269.6472         | 537.3031       | 269.1552         | E    | <b>476.2351</b> | 238.6212        | 459.2086       | 230.1079         | <b>458.2245</b> | 229.6159         | 4 |
| 6 | 102.0550       | 684.3563        | 342.6818        | 667.3297       | 334.1685         | 666.3457       | 333.6765         | E    | <b>347.1925</b> | 174.0999        | 330.1660       | 165.5866         | 329.1819        | 165.0946         | 3 |
| 7 | 44.0495        | 755.3934        | 378.2003        | 738.3668       | 369.6871         | 737.3828       | 369.1951         | A    | <b>218.1499</b> | 109.5786        | 201.1234       | 101.0653         |                 |                  | 2 |
| 8 | 101.1073       |                 |                 |                |                  |                |                  | K    | 147.1128        | 74.0600         | 130.0863       | 65.5468          |                 |                  | 1 |

MS/MS Fragmentation of **LVINSGNGAVEDR**

Found in **P16070**, P16070|CD44\_HUMAN CD44 antigen OS=Homo sapiens GN=CD44 PE=1 SV=2

Match to Query 401: 1342.744584 from(672.379568,2+)

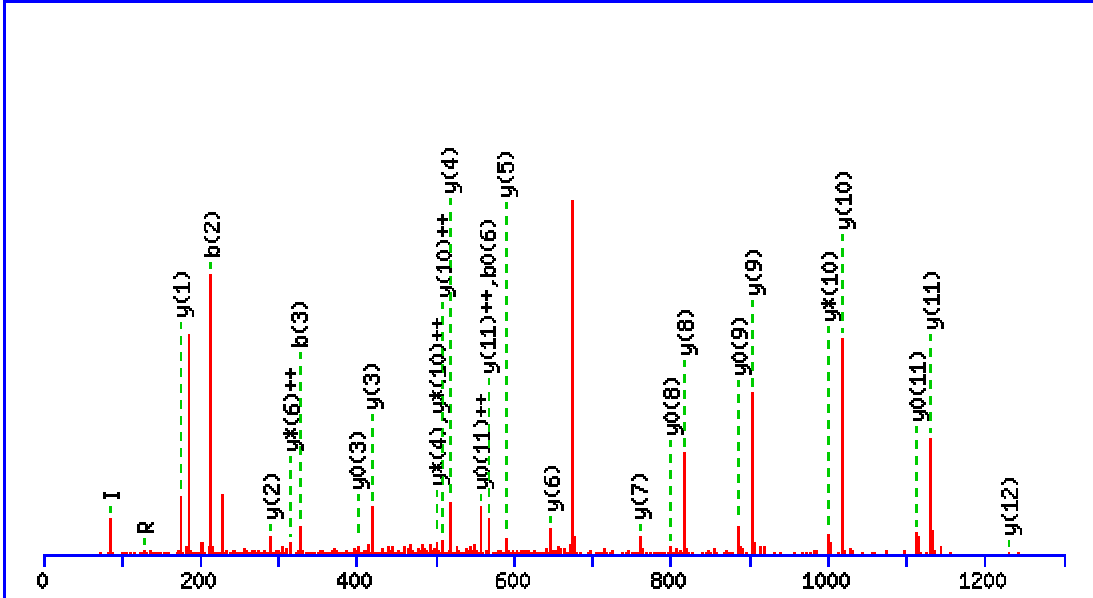

Monoisotopic mass of neutral peptide Mr(calc): 1342.6841

Fixed modifications: Carbamidomethyl (C)

Ions Score: 95 Expect: 2.3e-008

Matches (Bold Red): 29/141 fragment ions using 51 most intense peaks

| #  | Immon.          | b               | b <sup>++</sup> | b*        | b <sup>***</sup> | b <sup>0</sup>  | b <sup>0++</sup> | Seq. | y                | y <sup>++</sup> | y*               | y <sup>***</sup> | y <sup>0</sup>   | y <sup>0++</sup> | #  |
|----|-----------------|-----------------|-----------------|-----------|------------------|-----------------|------------------|------|------------------|-----------------|------------------|------------------|------------------|------------------|----|
| 1  | <b>86.0964</b>  | 114.0913        | 57.5493         |           |                  |                 |                  | L    |                  |                 |                  |                  |                  |                  | 13 |
| 2  | 72.0808         | <b>213.1598</b> | 107.0835        |           |                  |                 |                  | V    | <b>1230.6073</b> | 615.8073        | 1213.5808        | 607.2940         | 1212.5967        | 606.8020         | 12 |
| 3  | <b>86.0964</b>  | <b>326.2438</b> | 163.6255        |           |                  |                 |                  | I    | <b>1131.5389</b> | <b>566.2731</b> | 1114.5123        | 557.7598         | <b>1113.5283</b> | <b>557.2678</b>  | 11 |
| 4  | 87.0553         | 440.2867        | 220.6470        | 423.2602  | 212.1337         |                 |                  | N    | <b>1018.4548</b> | <b>509.7311</b> | <b>1001.4283</b> | <b>501.2178</b>  | 1000.4443        | 500.7258         | 10 |
| 5  | 60.0444         | 527.3188        | 264.1630        | 510.2922  | 255.6498         | 509.3082        | 255.1577         | S    | <b>904.4119</b>  | 452.7096        | 887.3854         | 444.1963         | <b>886.4013</b>  | 443.7043         | 9  |
| 6  | 30.0338         | 584.3402        | 292.6738        | 567.3137  | 284.1605         | <b>566.3297</b> | 283.6685         | G    | <b>817.3799</b>  | 409.1936        | 800.3533         | 400.6803         | <b>799.3693</b>  | 400.1883         | 8  |
| 7  | 87.0553         | 698.3832        | 349.6952        | 681.3566  | 341.1819         | 680.3726        | 340.6899         | N    | <b>760.3584</b>  | 380.6828        | 743.3319         | 372.1696         | 742.3478         | 371.6776         | 7  |
| 8  | 30.0338         | 755.4046        | 378.2060        | 738.3781  | 369.6927         | 737.3941        | 369.2007         | G    | <b>646.3155</b>  | 323.6614        | 629.2889         | <b>315.1481</b>  | 628.3049         | 314.6561         | 6  |
| 9  | 44.0495         | 826.4417        | 413.7245        | 809.4152  | 405.2112         | 808.4312        | 404.7192         | A    | <b>589.2940</b>  | 295.1506        | 572.2675         | 286.6374         | 571.2835         | 286.1454         | 5  |
| 10 | 72.0808         | 925.5102        | 463.2587        | 908.4836  | 454.7454         | 907.4996        | 454.2534         | V    | <b>518.2569</b>  | 259.6321        | <b>501.2304</b>  | 251.1188         | 500.2463         | 250.6268         | 4  |
| 11 | 102.0550        | 1054.5527       | 527.7800        | 1037.5262 | 519.2667         | 1036.5422       | 518.7747         | E    | <b>419.1885</b>  | 210.0979        | 402.1619         | 201.5846         | <b>401.1779</b>  | 201.0926         | 3  |
| 12 | 88.0393         | 1169.5797       | 585.2935        | 1152.5531 | 576.7802         | 1151.5691       | 576.2882         | D    | <b>290.1459</b>  | 145.5766        | 273.1193         | 137.0633         | 272.1353         | 136.5713         | 2  |
| 13 | <b>129.1135</b> |                 |                 |           |                  |                 |                  | R    | <b>175.1190</b>  | 88.0631         | 158.0924         | 79.5498          |                  |                  | 1  |

MS/MS Fragmentation of **VVDVLDSIK**

Found in **P00918**, P00918|CAH2\_HUMAN Carbonic anhydrase 2 OS=Homo sapiens GN=CA2 PE=1 SV=2

Match to Query 212: 986.546988 from(494.280770,2+)

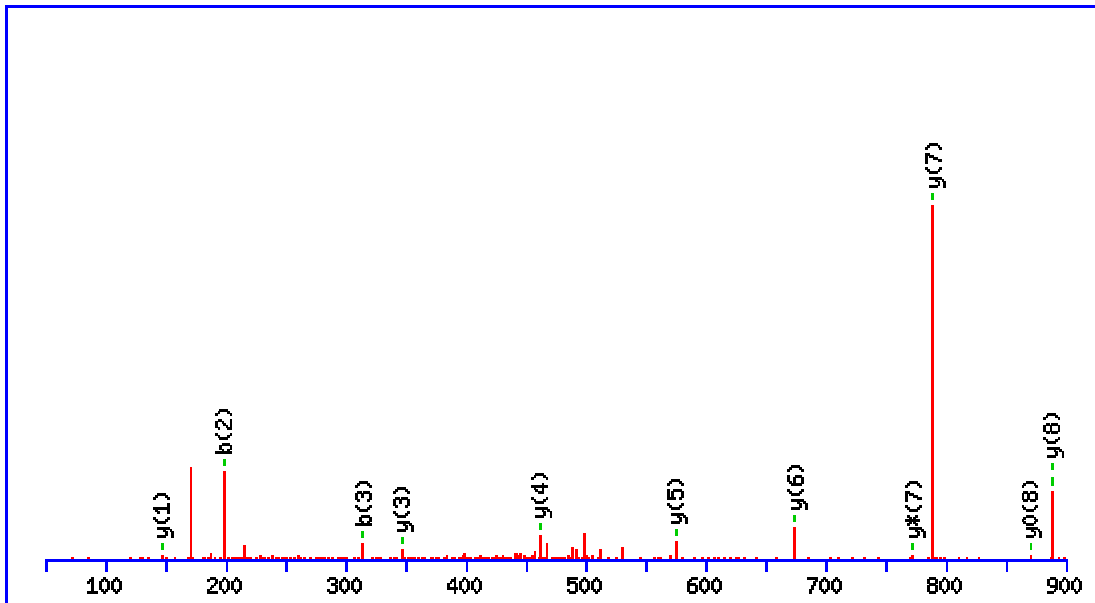

Monoisotopic mass of neutral peptide  $M_r(\text{calc})$ : 986.5648

Fixed modifications: Carbamidomethyl (C)

Ions Score: 57 Expect: 0.00016

Matches (**Bold Red**): 11/81 fragment ions using 19 most intense peaks

| # | Immon.   | b               | b <sup>++</sup> | b <sup>0</sup> | b <sup>0++</sup> | Seq. | y               | y <sup>++</sup> | y <sup>*</sup>  | y <sup>*++</sup> | y <sup>0</sup>  | y <sup>0++</sup> | # |
|---|----------|-----------------|-----------------|----------------|------------------|------|-----------------|-----------------|-----------------|------------------|-----------------|------------------|---|
| 1 | 72.0808  | 100.0757        | 50.5415         |                |                  | V    |                 |                 |                 |                  |                 |                  | 9 |
| 2 | 72.0808  | <b>199.1441</b> | 100.0757        |                |                  | V    | <b>888.5037</b> | 444.7555        | 871.4771        | 436.2422         | <b>870.4931</b> | 435.7502         | 8 |
| 3 | 88.0393  | <b>314.1710</b> | 157.5892        | 296.1605       | 148.5839         | D    | <b>789.4353</b> | 395.2213        | <b>772.4087</b> | 386.7080         | 771.4247        | 386.2160         | 7 |
| 4 | 72.0808  | 413.2395        | 207.1234        | 395.2289       | 198.1181         | V    | <b>674.4083</b> | 337.7078        | 657.3818        | 329.1945         | 656.3978        | 328.7025         | 6 |
| 5 | 86.0964  | 526.3235        | 263.6654        | 508.3130       | 254.6601         | L    | <b>575.3399</b> | 288.1736        | 558.3134        | 279.6603         | 557.3293        | 279.1683         | 5 |
| 6 | 88.0393  | 641.3505        | 321.1789        | 623.3399       | 312.1736         | D    | <b>462.2558</b> | 231.6316        | 445.2293        | 223.1183         | 444.2453        | 222.6263         | 4 |
| 7 | 60.0444  | 728.3825        | 364.6949        | 710.3719       | 355.6896         | S    | <b>347.2289</b> | 174.1181        | 330.2023        | 165.6048         | 329.2183        | 165.1128         | 3 |
| 8 | 86.0964  | 841.4666        | 421.2369        | 823.4560       | 412.2316         | I    | 260.1969        | 130.6021        | 243.1703        | 122.0888         |                 |                  | 2 |
| 9 | 101.1073 |                 |                 |                |                  | K    | <b>147.1128</b> | 74.0600         | 130.0863        | 65.5468          |                 |                  | 1 |

MS/MS Fragmentation of **SADFTNFDPR**

Found in **P00918**, P00918|CAH2\_HUMAN Carbonic anhydrase 2 OS=Homo sapiens GN=CA2 PE=1 SV=2

Match to Query 172: 1168.348294 from(585.181423,2+)

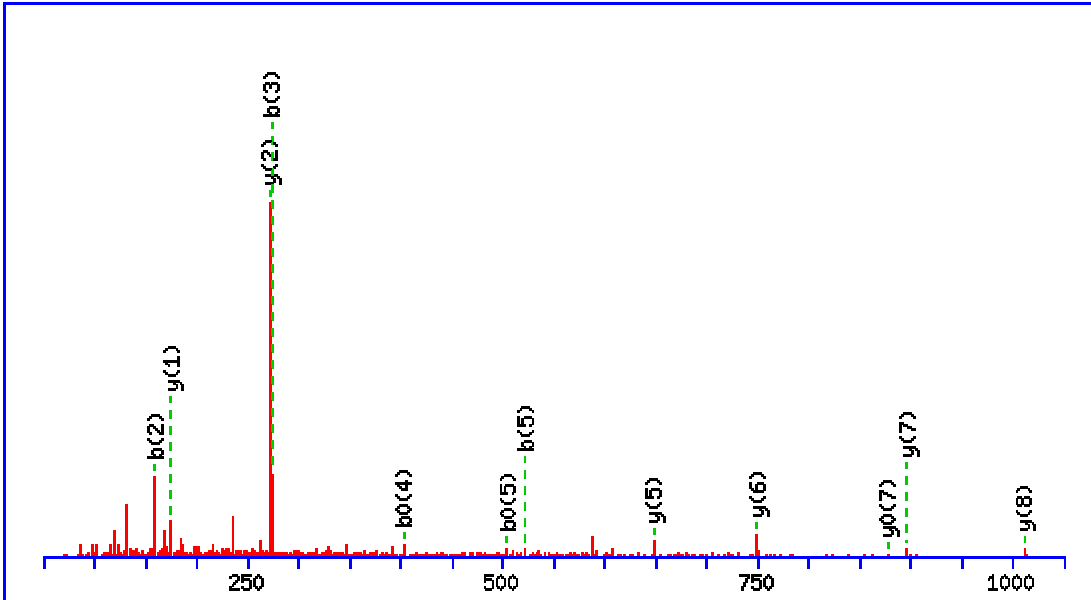

Monoisotopic mass of neutral peptide Mr(calc): 1168.5149

Fixed modifications: Carbamidomethyl (C)

Ions Score: 40 Expect: 0.0053

Matches (Bold Red): 12/104 fragment ions using 23 most intense peaks

| #  | Immon.   | b               | b <sup>++</sup> | b <sup>*</sup> | b <sup>+++</sup> | b <sup>0</sup>  | b <sup>0++</sup> | Seq. | y                | y <sup>++</sup> | y <sup>*</sup> | y <sup>+++</sup> | y <sup>0</sup>  | y <sup>0++</sup> | #  |
|----|----------|-----------------|-----------------|----------------|------------------|-----------------|------------------|------|------------------|-----------------|----------------|------------------|-----------------|------------------|----|
| 1  | 60.0444  | 88.0393         | 44.5233         |                |                  | 70.0287         | 35.5180          | S    |                  |                 |                |                  |                 |                  | 10 |
| 2  | 44.0495  | <b>159.0764</b> | 80.0418         |                |                  | 141.0659        | 71.0366          | A    | 1082.4901        | 541.7487        | 1065.4636      | 533.2354         | 1064.4796       | 532.7434         | 9  |
| 3  | 88.0393  | <b>274.1034</b> | 137.5553        |                |                  | 256.0928        | 128.5500         | D    | <b>1011.4530</b> | 506.2302        | 994.4265       | 497.7169         | 993.4425        | 497.2249         | 8  |
| 4  | 120.0808 | 421.1718        | 211.0895        |                |                  | <b>403.1612</b> | 202.0842         | F    | <b>896.4261</b>  | 448.7167        | 879.3995       | 440.2034         | <b>878.4155</b> | 439.7114         | 7  |
| 5  | 74.0600  | <b>522.2195</b> | 261.6134        |                |                  | <b>504.2089</b> | 252.6081         | T    | <b>749.3577</b>  | 375.1825        | 732.3311       | 366.6692         | 731.3471        | 366.1772         | 6  |
| 6  | 87.0553  | 636.2624        | 318.6348        | 619.2358       | 310.1216         | 618.2518        | 309.6295         | N    | <b>648.3100</b>  | 324.6586        | 631.2835       | 316.1454         | 630.2994        | 315.6534         | 5  |
| 7  | 120.0808 | 783.3308        | 392.1690        | 766.3042       | 383.6558         | 765.3202        | 383.1638         | F    | 534.2671         | 267.6372        | 517.2405       | 259.1239         | 516.2565        | 258.6319         | 4  |
| 8  | 88.0393  | 898.3577        | 449.6825        | 881.3312       | 441.1692         | 880.3472        | 440.6772         | D    | 387.1987         | 194.1030        | 370.1721       | 185.5897         | 369.1881        | 185.0977         | 3  |
| 9  | 70.0651  | 995.4105        | 498.2089        | 978.3840       | 489.6956         | 977.3999        | 489.2036         | P    | <b>272.1717</b>  | 136.5895        | 255.1452       | 128.0762         |                 |                  | 2  |
| 10 | 129.1135 |                 |                 |                |                  |                 |                  | R    | <b>175.1190</b>  | 88.0631         | 158.0924       | 79.5498          |                 |                  | 1  |

MS/MS Fragmentation of **VQVQVVER**

Found in **O75955**, O75955|FLOT1\_HUMAN Flotillin-1 OS=Homo sapiens GN=FLOT1 PE=1 SV=3

Match to Query 42: 955.386216 from(478.700384,2+)

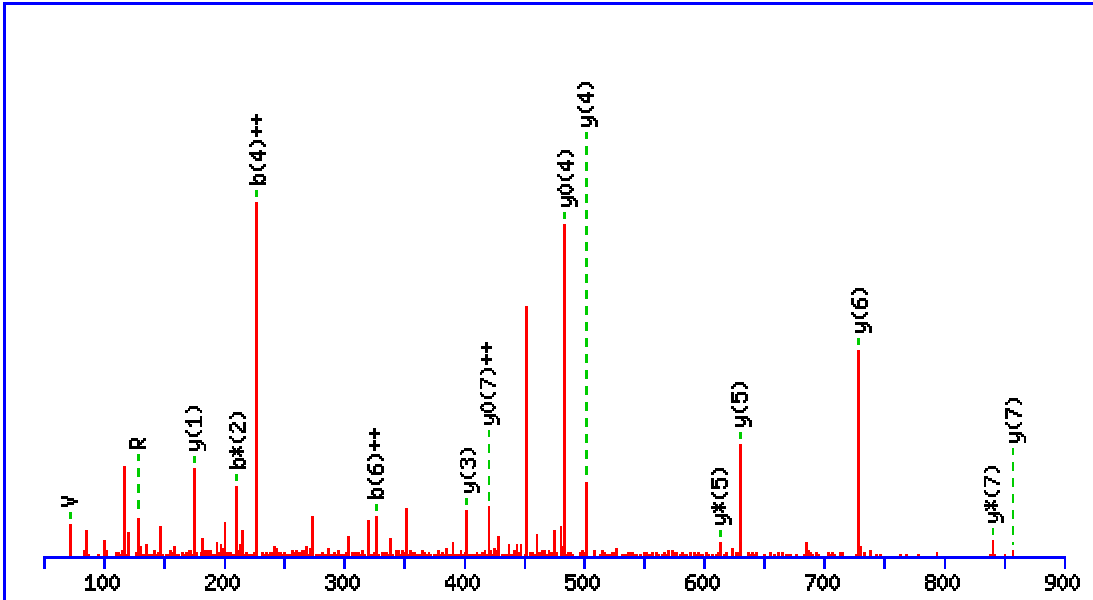

Monoisotopic mass of neutral peptide  $M_r(\text{calc})$ : 955.5451

Fixed modifications: Carbamidomethyl (C)

Ions Score: 45 Expect: 0.0025

Matches (Bold Red): 20/76 fragment ions using 27 most intense peaks

| # | Immon.          | b               | b <sup>++</sup> | b*              | b <sup>*++</sup> | b <sup>0</sup> | b <sup>0++</sup> | Seq. | y               | y <sup>++</sup> | y*              | y <sup>*++</sup> | y <sup>0</sup>  | y <sup>0++</sup> | # |
|---|-----------------|-----------------|-----------------|-----------------|------------------|----------------|------------------|------|-----------------|-----------------|-----------------|------------------|-----------------|------------------|---|
| 1 | <b>72.0808</b>  | 100.0757        | 50.5415         |                 |                  |                |                  | V    |                 |                 |                 |                  |                 |                  | 8 |
| 2 | 101.0709        | <b>228.1343</b> | 114.5708        | <b>211.1077</b> | 106.0575         |                |                  | Q    | <b>857.4839</b> | 429.2456        | <b>840.4574</b> | 420.7323         | 839.4734        | <b>420.2403</b>  | 7 |
| 3 | <b>72.0808</b>  | <b>327.2027</b> | 164.1050        | 310.1761        | 155.5917         |                |                  | V    | <b>729.4254</b> | 365.2163        | 712.3988        | 356.7030         | 711.4148        | 356.2110         | 6 |
| 4 | 101.0709        | 455.2613        | <b>228.1343</b> | 438.2347        | 219.6210         |                |                  | Q    | <b>630.3570</b> | 315.6821        | <b>613.3304</b> | 307.1688         | 612.3464        | 306.6768         | 5 |
| 5 | <b>72.0808</b>  | 554.3297        | 277.6685        | 537.3031        | 269.1552         |                |                  | V    | <b>502.2984</b> | 251.6528        | 485.2718        | 243.1395         | <b>484.2878</b> | 242.6475         | 4 |
| 6 | <b>72.0808</b>  | 653.3981        | <b>327.2027</b> | 636.3715        | 318.6894         |                |                  | V    | <b>403.2300</b> | 202.1186        | 386.2034        | 193.6053         | 385.2194        | 193.1133         | 3 |
| 7 | 102.0550        | 782.4407        | 391.7240        | 765.4141        | 383.2107         | 764.4301       | 382.7187         | E    | 304.1615        | 152.5844        | 287.1350        | 144.0711         | 286.1510        | 143.5791         | 2 |
| 8 | <b>129.1135</b> |                 |                 |                 |                  |                |                  | R    | <b>175.1190</b> | 88.0631         | 158.0924        | 79.5498          |                 |                  | 1 |

MS/MS Fragmentation of **ISLNTLTLNVK**

Found in **O75955**, O75955|FLOT1\_HUMAN Flotillin-1 OS=Homo sapiens GN=FLOT1 PE=1 SV=3

Match to Query 399: 1214.709068 from(608.361810,2+)

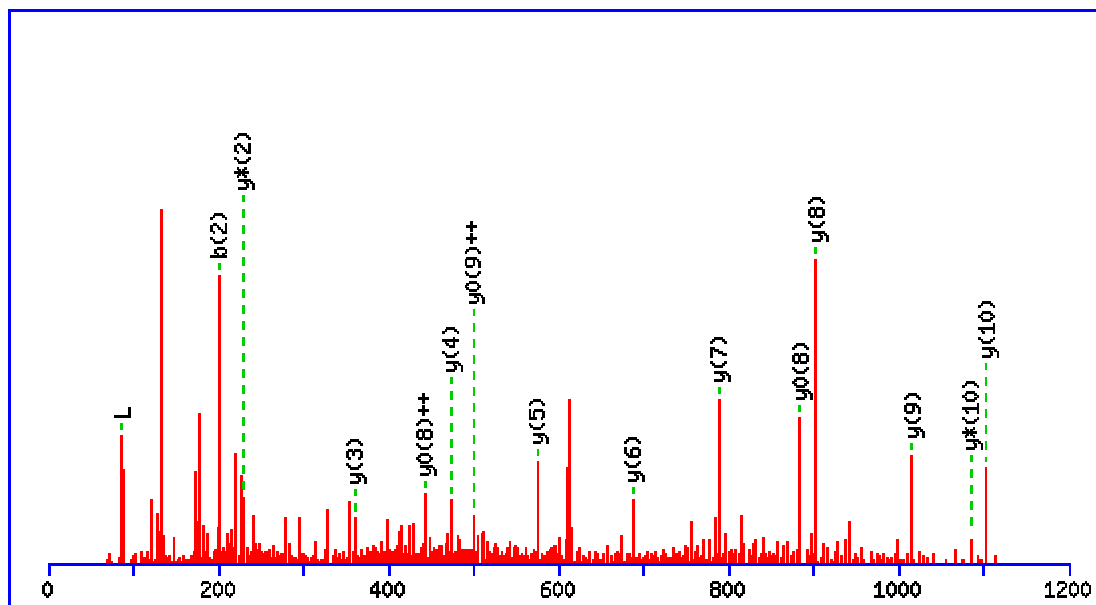

Monoisotopic mass of neutral peptide  $M_r(\text{calc})$ : 1214.7234

Fixed modifications: Carbamidomethyl (C)

Ions Score: 45 Expect: 0.0029

Matches (**Bold Red**): 18/115 fragment ions using 28 most intense peaks

| #         | Immon.         | b               | b <sup>++</sup> | b*        | b <sup>***</sup> | b <sup>0</sup> | b <sup>0++</sup> | Seq.     | y                | y <sup>++</sup> | y*               | y <sup>***</sup> | y <sup>0</sup>  | y <sup>0++</sup> | #         |
|-----------|----------------|-----------------|-----------------|-----------|------------------|----------------|------------------|----------|------------------|-----------------|------------------|------------------|-----------------|------------------|-----------|
| <b>1</b>  | <b>86.0964</b> | 114.0913        | 57.5493         |           |                  |                |                  | <b>I</b> |                  |                 |                  |                  |                 |                  | <b>11</b> |
| <b>2</b>  | 60.0444        | <b>201.1234</b> | 101.0653        |           |                  | 183.1128       | 92.0600          | <b>S</b> | <b>1102.6467</b> | 551.8270        | <b>1085.6201</b> | 543.3137         | 1084.6361       | 542.8217         | <b>10</b> |
| <b>3</b>  | <b>86.0964</b> | 314.2074        | 157.6074        |           |                  | 296.1969       | 148.6021         | <b>L</b> | <b>1015.6146</b> | 508.3109        | 998.5881         | 499.7977         | 997.6041        | <b>499.3057</b>  | <b>9</b>  |
| <b>4</b>  | 87.0553        | 428.2504        | 214.6288        | 411.2238  | 206.1155         | 410.2398       | 205.6235         | <b>N</b> | <b>902.5306</b>  | 451.7689        | 885.5040         | 443.2556         | <b>884.5200</b> | <b>442.7636</b>  | <b>8</b>  |
| <b>5</b>  | 74.0600        | 529.2980        | 265.1527        | 512.2715  | 256.6394         | 511.2875       | 256.1474         | <b>T</b> | <b>788.4876</b>  | 394.7475        | 771.4611         | 386.2342         | 770.4771        | 385.7422         | <b>7</b>  |
| <b>6</b>  | <b>86.0964</b> | 642.3821        | 321.6947        | 625.3556  | 313.1814         | 624.3715       | 312.6894         | <b>L</b> | <b>687.4400</b>  | 344.2236        | 670.4134         | 335.7103         | 669.4294        | 335.2183         | <b>6</b>  |
| <b>7</b>  | 74.0600        | 743.4298        | 372.2185        | 726.4032  | 363.7053         | 725.4192       | 363.2132         | <b>T</b> | <b>574.3559</b>  | 287.6816        | 557.3293         | 279.1683         | 556.3453        | 278.6763         | <b>5</b>  |
| <b>8</b>  | <b>86.0964</b> | 856.5138        | 428.7606        | 839.4873  | 420.2473         | 838.5033       | 419.7553         | <b>L</b> | <b>473.3082</b>  | 237.1577        | 456.2817         | 228.6445         |                 |                  | <b>4</b>  |
| <b>9</b>  | 87.0553        | 970.5568        | 485.7820        | 953.5302  | 477.2687         | 952.5462       | 476.7767         | <b>N</b> | <b>360.2241</b>  | 180.6157        | 343.1976         | 172.1024         |                 |                  | <b>3</b>  |
| <b>10</b> | 72.0808        | 1069.6252       | 535.3162        | 1052.5986 | 526.8030         | 1051.6146      | 526.3109         | <b>V</b> | 246.1812         | 123.5942        | <b>229.1547</b>  | 115.0810         |                 |                  | <b>2</b>  |
| <b>11</b> | 101.1073       |                 |                 |           |                  |                |                  | <b>K</b> | 147.1128         | 74.0600         | 130.0863         | 65.5468          |                 |                  | <b>1</b>  |

MS/MS Fragmentation of **VTGEVLDILTR**

Found in **O75955**, O75955|FLOT1\_HUMAN Flotillin-1 OS=Homo sapiens GN=FLOT1 PE=1 SV=3

Match to Query 504: 1214.688006 from(608.351279,2+)

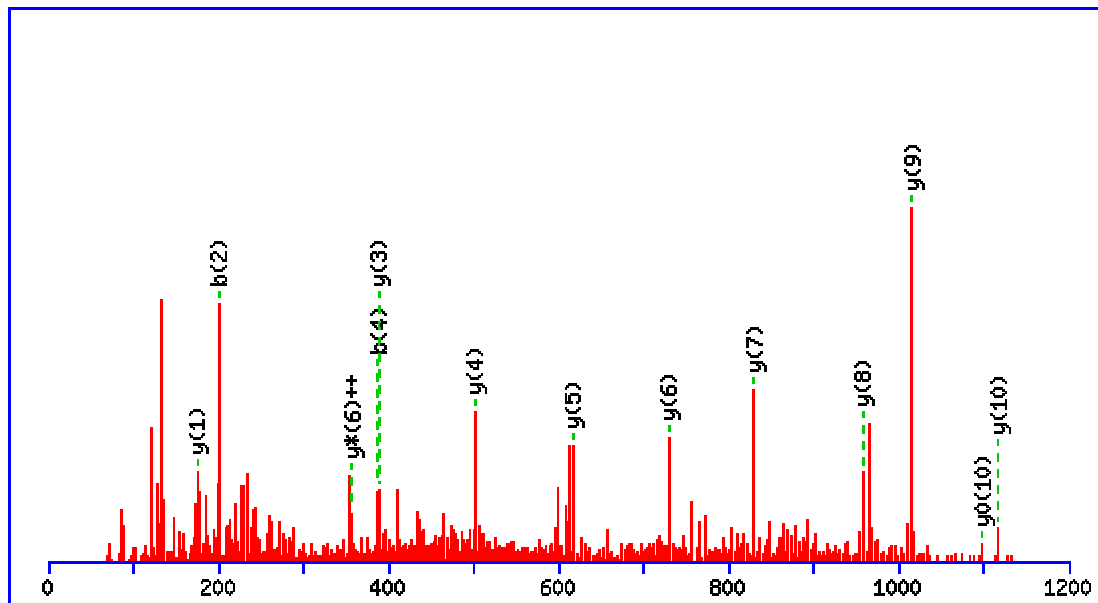

Monoisotopic mass of neutral peptide Mr(calc): 1214.6871

Fixed modifications: Carbamidomethyl (C)

Ions Score: 65 Expect: 2.9e-005

Matches (Bold Red): 13/107 fragment ions using 28 most intense peaks

| #  | Immon.   | b               | b <sup>++</sup> | b <sup>0</sup> | b <sup>0++</sup> | Seq. | y                | y <sup>++</sup> | y <sup>*</sup> | y <sup>*++</sup> | y <sup>0</sup>   | y <sup>0++</sup> | #  |
|----|----------|-----------------|-----------------|----------------|------------------|------|------------------|-----------------|----------------|------------------|------------------|------------------|----|
| 1  | 72.0808  | 100.0757        | 50.5415         |                |                  | V    |                  |                 |                |                  |                  |                  | 11 |
| 2  | 74.0600  | <b>201.1234</b> | 101.0653        | 183.1128       | 92.0600          | T    | <b>1116.6259</b> | 558.8166        | 1099.5994      | 550.3033         | <b>1098.6154</b> | 549.8113         | 10 |
| 3  | 30.0338  | 258.1448        | 129.5761        | 240.1343       | 120.5708         | G    | <b>1015.5782</b> | 508.2928        | 998.5517       | 499.7795         | 997.5677         | 499.2875         | 9  |
| 4  | 102.0550 | <b>387.1874</b> | 194.0974        | 369.1769       | 185.0921         | E    | <b>958.5568</b>  | 479.7820        | 941.5302       | 471.2688         | 940.5462         | 470.7767         | 8  |
| 5  | 72.0808  | 486.2558        | 243.6316        | 468.2453       | 234.6263         | V    | <b>829.5142</b>  | 415.2607        | 812.4876       | 406.7475         | 811.5036         | 406.2554         | 7  |
| 6  | 86.0964  | 599.3399        | 300.1736        | 581.3293       | 291.1683         | L    | <b>730.4458</b>  | 365.7265        | 713.4192       | <b>357.2132</b>  | 712.4352         | 356.7212         | 6  |
| 7  | 88.0393  | 714.3668        | 357.6871        | 696.3563       | 348.6818         | D    | <b>617.3617</b>  | 309.1845        | 600.3352       | 300.6712         | 599.3511         | 300.1792         | 5  |
| 8  | 86.0964  | 827.4509        | 414.2291        | 809.4403       | 405.2238         | I    | <b>502.3348</b>  | 251.6710        | 485.3082       | 243.1577         | 484.3242         | 242.6657         | 4  |
| 9  | 86.0964  | 940.5350        | 470.7711        | 922.5244       | 461.7658         | L    | <b>389.2507</b>  | 195.1290        | 372.2241       | 186.6157         | 371.2401         | 186.1237         | 3  |
| 10 | 74.0600  | 1041.5827       | 521.2950        | 1023.5721      | 512.2897         | T    | 276.1666         | 138.5870        | 259.1401       | 130.0737         | 258.1561         | 129.5817         | 2  |
| 11 | 129.1135 |                 |                 |                |                  | R    | <b>175.1190</b>  | 88.0631         | 158.0924       | 79.5498          |                  |                  | 1  |



MS/MS Fragmentation of **AGDEFVEK**

Found in **Q16836**, Q16836|HCDH\_HUMAN Hydroxyacyl-coenzyme A dehydrogenase, mitochondrial  
 OS=Homo sapiens GN=HADH PE=1 SV=2

Match to Query 212: 893.420562 from(447.717557,2+)

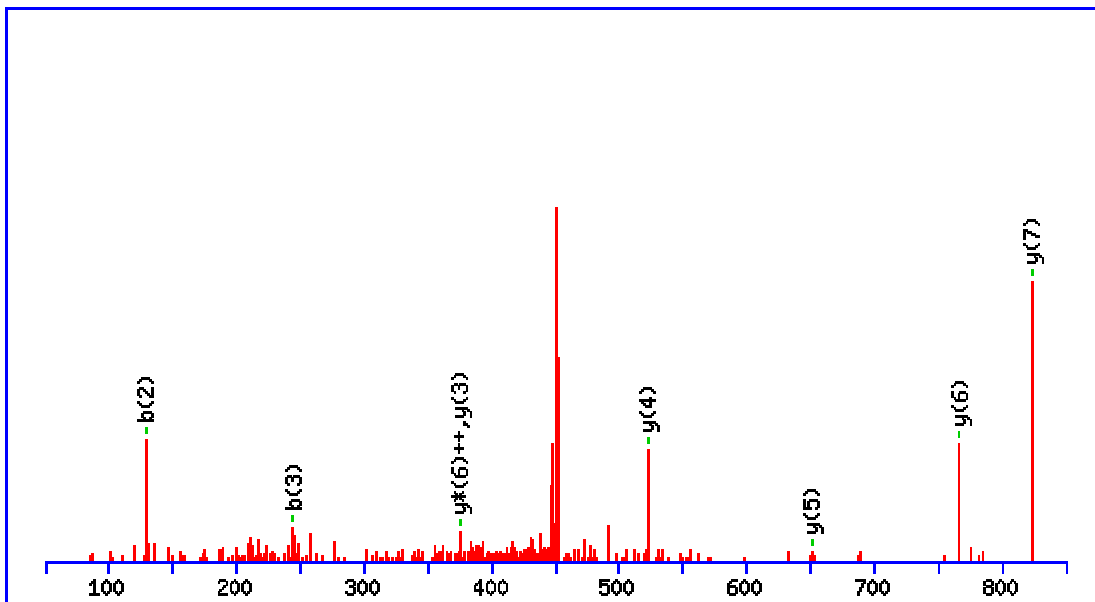

Monoisotopic mass of neutral peptide  $M_r(\text{calc})$ : 893.4131

Fixed modifications: Carbamidomethyl (C)

Ions Score: 45 Expect: 0.0023

Matches (**Bold Red**): 8/72 fragment ions using 18 most intense peaks

| # | Immon.   | b               | b <sup>++</sup> | b <sup>0</sup> | b <sup>0++</sup> | Seq. | y               | y <sup>++</sup> | y <sup>*</sup> | y <sup>*++</sup> | y <sup>0</sup> | y <sup>0++</sup> | # |
|---|----------|-----------------|-----------------|----------------|------------------|------|-----------------|-----------------|----------------|------------------|----------------|------------------|---|
| 1 | 44.0495  | 72.0444         | 36.5258         |                |                  | A    |                 |                 |                |                  |                |                  | 8 |
| 2 | 30.0338  | <b>129.0659</b> | 65.0366         |                |                  | G    | <b>823.3832</b> | 412.1953        | 806.3567       | 403.6820         | 805.3727       | 403.1900         | 7 |
| 3 | 88.0393  | <b>244.0928</b> | 122.5500        | 226.0822       | 113.5448         | D    | <b>766.3618</b> | 383.6845        | 749.3352       | <b>375.1712</b>  | 748.3512       | 374.6792         | 6 |
| 4 | 102.0550 | 373.1354        | 187.0713        | 355.1248       | 178.0661         | E    | <b>651.3348</b> | 326.1710        | 634.3083       | 317.6578         | 633.3243       | 317.1658         | 5 |
| 5 | 120.0808 | 520.2038        | 260.6055        | 502.1932       | 251.6003         | F    | <b>522.2922</b> | 261.6498        | 505.2657       | 253.1365         | 504.2817       | 252.6445         | 4 |
| 6 | 72.0808  | 619.2722        | 310.1397        | 601.2617       | 301.1345         | V    | <b>375.2238</b> | 188.1155        | 358.1973       | 179.6023         | 357.2132       | 179.1103         | 3 |
| 7 | 102.0550 | 748.3148        | 374.6610        | 730.3042       | 365.6558         | E    | 276.1554        | 138.5813        | 259.1288       | 130.0681         | 258.1448       | 129.5761         | 2 |
| 8 | 101.1073 |                 |                 |                |                  | K    | 147.1128        | 74.0600         | 130.0863       | 65.5468          |                |                  | 1 |

MS/MS Fragmentation of **PMFIVNTNVPR**

Found in **P14174**, P14174|MIF\_HUMAN Macrophage migration inhibitory factor OS=Homo sapiens GN=MIF PE=1 SV=4

Match to Query 226: 1302.446554 from(652.230553,2+)

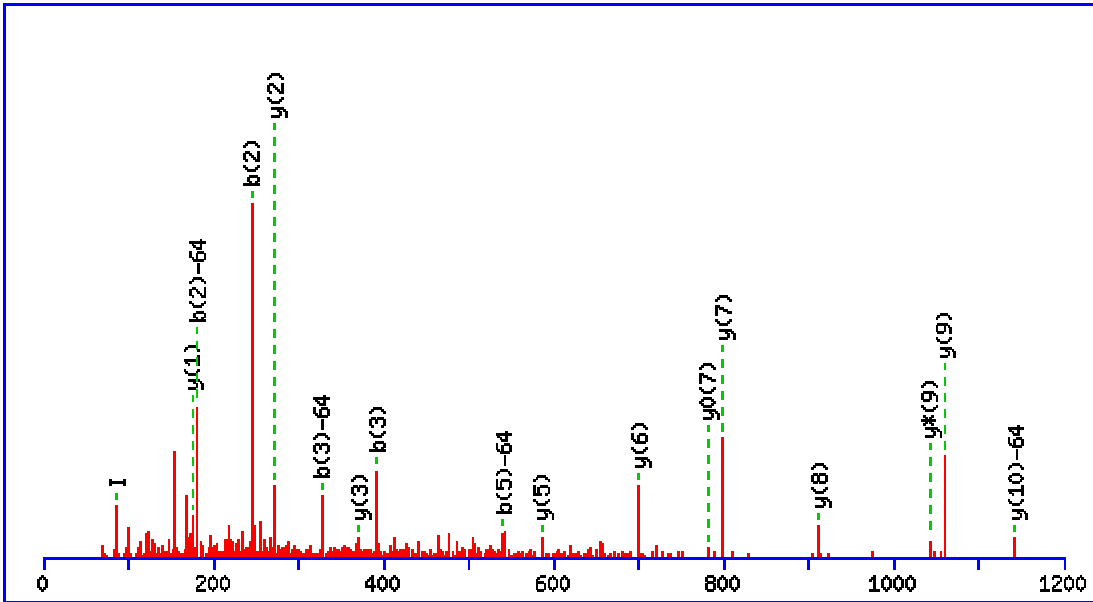

Monoisotopic mass of neutral peptide  $M_r(\text{calc})$ : 1302.6754

Fixed modifications: Carbamidomethyl (C)

Variable modifications:

**M2** : Oxidation (M), with neutral losses 63.9983(shown in table), 0.0000

Ions Score: 67 Expect: 1.3e-005

Matches (**Bold Red**): 17/144 fragment ions using 33 most intense peaks

| #  | Immon.         | b               | b <sup>++</sup> | b <sup>*</sup> | b <sup>*++</sup> | b <sup>0</sup> | b <sup>0++</sup> | Seq. | y                | y <sup>++</sup> | y <sup>*</sup>   | y <sup>*++</sup> | y <sup>0</sup>  | y <sup>0++</sup> | #  |
|----|----------------|-----------------|-----------------|----------------|------------------|----------------|------------------|------|------------------|-----------------|------------------|------------------|-----------------|------------------|----|
| 1  | 70.0651        | 98.0600         | 49.5337         |                |                  |                |                  | P    |                  |                 |                  |                  |                 |                  | 11 |
| 2  | 56.0495        | <b>181.0972</b> | 91.0522         |                |                  |                |                  | M    | <b>1142.6317</b> | 571.8195        | 1125.6051        | 563.3062         | 1124.6211       | 562.8142         | 10 |
| 3  | 120.0808       | <b>328.1656</b> | 164.5864        |                |                  |                |                  | F    | <b>1059.5946</b> | 530.3009        | <b>1042.5680</b> | 521.7876         | 1041.5840       | 521.2956         | 9  |
| 4  | <b>86.0964</b> | 441.2496        | 221.1285        |                |                  |                |                  | I    | <b>912.5261</b>  | 456.7667        | 895.4996         | 448.2534         | 894.5156        | 447.7614         | 8  |
| 5  | 72.0808        | <b>540.3181</b> | 270.6627        |                |                  |                |                  | V    | <b>799.4421</b>  | 400.2247        | 782.4155         | 391.7114         | <b>781.4315</b> | 391.2194         | 7  |
| 6  | 87.0553        | 654.3610        | 327.6841        | 637.3344       | 319.1709         |                |                  | N    | <b>700.3737</b>  | 350.6905        | 683.3471         | 342.1772         | 682.3631        | 341.6852         | 6  |
| 7  | 74.0600        | 755.4087        | 378.2080        | 738.3821       | 369.6947         | 737.3981       | 369.2027         | T    | <b>586.3307</b>  | 293.6690        | 569.3042         | 285.1557         | 568.3202        | 284.6637         | 5  |
| 8  | 87.0553        | 869.4516        | 435.2294        | 852.4250       | 426.7162         | 851.4410       | 426.2241         | N    | 485.2831         | 243.1452        | 468.2565         | 234.6319         |                 |                  | 4  |
| 9  | 72.0808        | 968.5200        | 484.7636        | 951.4934       | 476.2504         | 950.5094       | 475.7584         | V    | <b>371.2401</b>  | 186.1237        | 354.2136         | 177.6104         |                 |                  | 3  |
| 10 | 70.0651        | 1065.5728       | 533.2900        | 1048.5462      | 524.7767         | 1047.5622      | 524.2847         | P    | <b>272.1717</b>  | 136.5895        | 255.1452         | 128.0762         |                 |                  | 2  |
| 11 | 129.1135       |                 |                 |                |                  |                |                  | R    | <b>175.1190</b>  | 88.0631         | 158.0924         | 79.5498          |                 |                  | 1  |

MS/MS Fragmentation of **FLVGFTNK**

Found in **P43307**, P43307|SSRA\_HUMAN Translocon-associated protein subunit alpha OS=Homo sapiens  
 GN=SSR1 PE=1 SV=3

Match to Query 260: 924.472170 from(463.243361,2+)

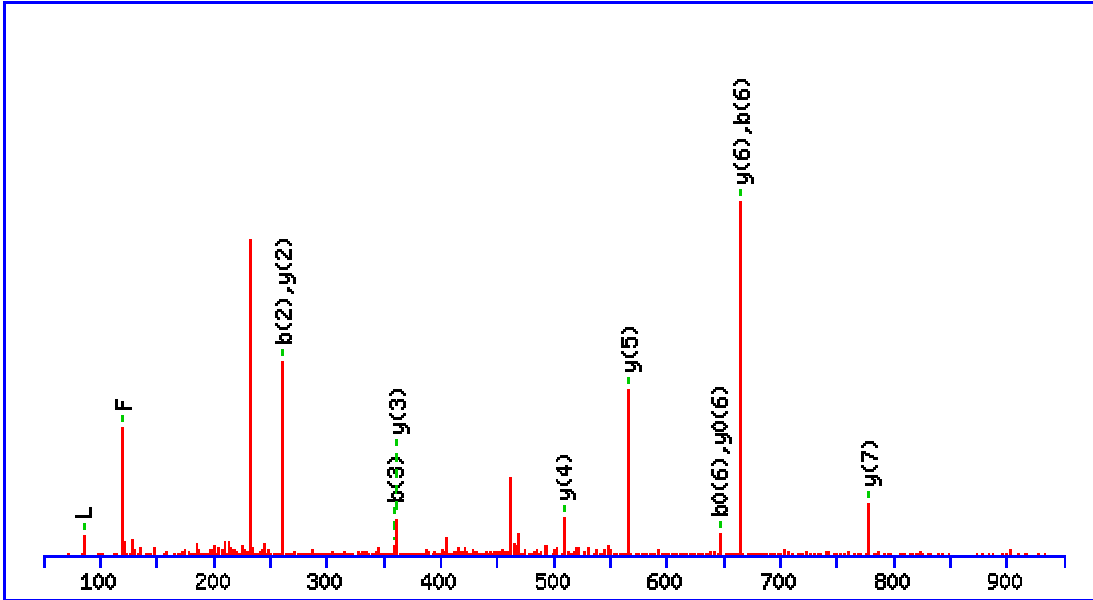

Monoisotopic mass of neutral peptide  $M_r(\text{calc})$ : 924.5069

Fixed modifications: Carbamidomethyl (C)

Ions Score: 42 Expect: 0.0038

Matches (**Bold Red**): 14/66 fragment ions using 18 most intense peaks

| # | Immon.          | b               | b <sup>++</sup> | b*       | b <sup>*++</sup> | b <sup>0</sup>  | b <sup>0++</sup> | Seq. | y               | y <sup>++</sup> | y*       | y <sup>*++</sup> | y <sup>0</sup>  | y <sup>0++</sup> | # |
|---|-----------------|-----------------|-----------------|----------|------------------|-----------------|------------------|------|-----------------|-----------------|----------|------------------|-----------------|------------------|---|
| 1 | <b>120.0808</b> | 148.0757        | 74.5415         |          |                  |                 |                  | F    |                 |                 |          |                  |                 |                  | 8 |
| 2 | <b>86.0964</b>  | <b>261.1598</b> | 131.0835        |          |                  |                 |                  | L    | <b>778.4458</b> | 389.7265        | 761.4192 | 381.2132         | 760.4352        | 380.7212         | 7 |
| 3 | 72.0808         | <b>360.2282</b> | 180.6177        |          |                  |                 |                  | V    | <b>665.3617</b> | 333.1845        | 648.3352 | 324.6712         | <b>647.3511</b> | 324.1792         | 6 |
| 4 | 30.0338         | 417.2496        | 209.1285        |          |                  |                 |                  | G    | <b>566.2933</b> | 283.6503        | 549.2667 | 275.1370         | 548.2827        | 274.6450         | 5 |
| 5 | <b>120.0808</b> | 564.3180        | 282.6627        |          |                  |                 |                  | F    | <b>509.2718</b> | 255.1395        | 492.2453 | 246.6263         | 491.2613        | 246.1343         | 4 |
| 6 | 74.0600         | <b>665.3657</b> | 333.1865        |          |                  | <b>647.3552</b> | 324.1812         | T    | <b>362.2034</b> | 181.6053        | 345.1769 | 173.0921         | 344.1928        | 172.6001         | 3 |
| 7 | 87.0553         | 779.4087        | 390.2080        | 762.3821 | 381.6947         | 761.3981        | 381.2027         | N    | <b>261.1557</b> | 131.0815        | 244.1292 | 122.5682         |                 |                  | 2 |
| 8 | 101.1073        |                 |                 |          |                  |                 |                  | K    | 147.1128        | 74.0600         | 130.0863 | 65.5468          |                 |                  | 1 |

MS/MS Fragmentation of **QLVEQVEQIQK**

Found in **Q9BVK6**, Q9BVK6|TMED9\_HUMAN Transmembrane emp24 domain-containing protein 9  
 OS=Homo sapiens GN=TMED9 PE=1 SV=1

Match to Query 589: 1340.728280 from(671.371416,2+)

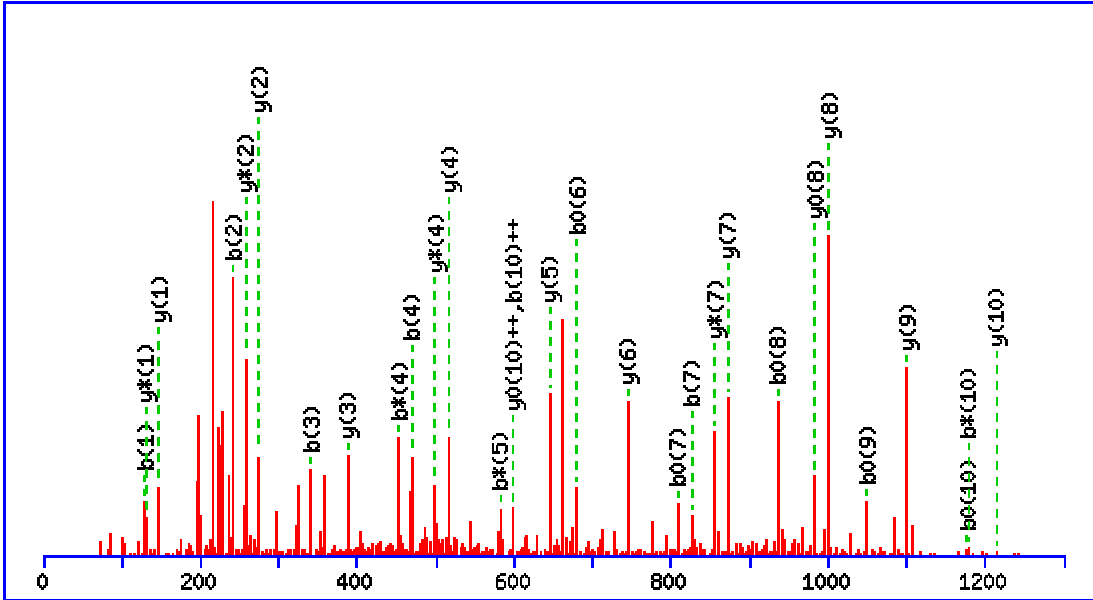

Monoisotopic mass of neutral peptide  $M_r(\text{calc})$ : 1340.7300

Fixed modifications: Carbamidomethyl (C)

Ions Score: 90 Expect: 7.5e-008

Matches (Bold Red): 31/117 fragment ions using 39 most intense peaks

| #  | Immon.   | b               | b <sup>+</sup>  | b*               | b <sup>+</sup> * | b <sup>0</sup>   | b <sup>0+</sup> | Seq. | y                | y <sup>+</sup> | y*              | y <sup>+</sup> * | y <sup>0</sup>  | y <sup>0+</sup> | #  |
|----|----------|-----------------|-----------------|------------------|------------------|------------------|-----------------|------|------------------|----------------|-----------------|------------------|-----------------|-----------------|----|
| 1  | 101.0709 | <b>129.0659</b> | 65.0366         | 112.0393         | 56.5233          |                  |                 | Q    |                  |                |                 |                  |                 |                 | 11 |
| 2  | 86.0964  | <b>242.1499</b> | 121.5786        | 225.1234         | 113.0653         |                  |                 | L    | <b>1213.6787</b> | 607.3430       | 1196.6521       | 598.8297         | 1195.6681       | <b>598.3377</b> | 10 |
| 3  | 72.0808  | <b>341.2183</b> | 171.1128        | 324.1918         | 162.5995         |                  |                 | V    | <b>1100.5946</b> | 550.8009       | 1083.5681       | 542.2877         | 1082.5841       | 541.7957        | 9  |
| 4  | 102.0550 | <b>470.2609</b> | 235.6341        | <b>453.2344</b>  | 227.1208         | 452.2504         | 226.6288        | E    | <b>1001.5262</b> | 501.2667       | 984.4997        | 492.7535         | <b>983.5156</b> | 492.2615        | 8  |
| 5  | 101.0709 | <b>598.3195</b> | 299.6634        | <b>581.2930</b>  | 291.1501         | 580.3089         | 290.6581        | Q    | <b>872.4836</b>  | 436.7454       | <b>855.4571</b> | 428.2322         | 854.4730        | 427.7402        | 7  |
| 6  | 72.0808  | 697.3879        | 349.1976        | 680.3614         | 340.6843         | <b>679.3774</b>  | 340.1923        | V    | <b>744.4250</b>  | 372.7162       | 727.3985        | 364.2029         | 726.4145        | 363.7109        | 6  |
| 7  | 102.0550 | <b>826.4305</b> | 413.7189        | 809.4040         | 405.2056         | <b>808.4199</b>  | 404.7136        | E    | <b>645.3566</b>  | 323.1819       | 628.3301        | 314.6687         | 627.3461        | 314.1767        | 5  |
| 8  | 101.0709 | 954.4891        | 477.7482        | 937.4625         | 469.2349         | <b>936.4785</b>  | 468.7429        | Q    | <b>516.3140</b>  | 258.6607       | <b>499.2875</b> | 250.1474         |                 |                 | 4  |
| 9  | 86.0964  | 1067.5732       | 534.2902        | 1050.5466        | 525.7769         | <b>1049.5626</b> | 525.2849        | I    | <b>388.2554</b>  | 194.6314       | 371.2289        | 186.1181         |                 |                 | 3  |
| 10 | 101.0709 | 1195.6317       | <b>598.3195</b> | <b>1178.6052</b> | 589.8062         | <b>1177.6212</b> | 589.3142        | Q    | <b>275.1714</b>  | 138.0893       | <b>258.1448</b> | 129.5761         |                 |                 | 2  |
| 11 | 101.1073 |                 |                 |                  |                  |                  |                 | K    | <b>147.1128</b>  | 74.0600        | <b>130.0863</b> | 65.5468          |                 |                 | 1  |

MS/MS Fragmentation of **AGNLGGGVVTIER**

Found in **P35268**, P35268|RL22\_HUMAN 60S ribosomal protein L22 OS=Homo sapiens GN=RPL22 PE=1 SV=2

Match to Query 439: 1241.694936 from(621.854744,2+)

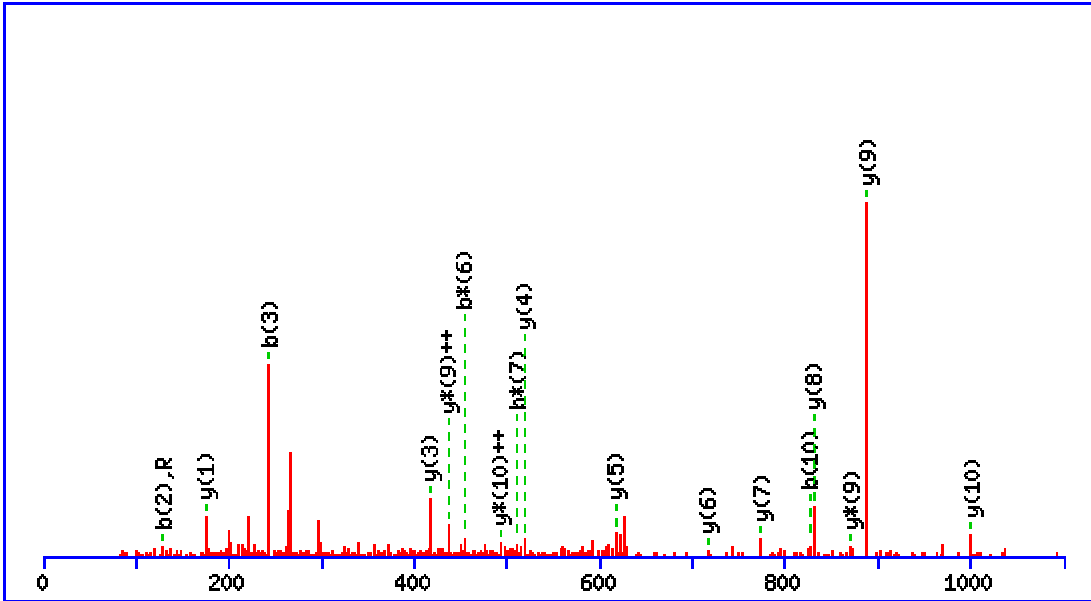

Monoisotopic mass of neutral peptide  $M_r(\text{calc})$ : 1241.6728

Fixed modifications: Carbamidomethyl (C)

Ions Score: 61 Expect: 6.6e-005

Matches (**Bold Red**): 18/133 fragment ions using 33 most intense peaks

| #  | Immon.          | b               | b <sup>++</sup> | b <sup>*</sup>  | b <sup>*++</sup> | b <sup>0</sup> | b <sup>0++</sup> | Seq. | y                | y <sup>++</sup> | y <sup>*</sup>  | y <sup>*++</sup> | y <sup>0</sup> | y <sup>0++</sup> | #  |
|----|-----------------|-----------------|-----------------|-----------------|------------------|----------------|------------------|------|------------------|-----------------|-----------------|------------------|----------------|------------------|----|
| 1  | 44.0495         | 72.0444         | 36.5258         |                 |                  |                |                  | A    |                  |                 |                 |                  |                |                  | 13 |
| 2  | 30.0338         | <b>129.0659</b> | 65.0366         |                 |                  |                |                  | G    | 1171.6430        | 586.3251        | 1154.6164       | 577.8118         | 1153.6324      | 577.3198         | 12 |
| 3  | 87.0553         | <b>243.1088</b> | 122.0580        | 226.0822        | 113.5448         |                |                  | N    | 1114.6215        | 557.8144        | 1097.5950       | 549.3011         | 1096.6109      | 548.8091         | 11 |
| 4  | 86.0964         | 356.1928        | 178.6001        | 339.1663        | 170.0868         |                |                  | L    | <b>1000.5786</b> | 500.7929        | 983.5520        | <b>492.2796</b>  | 982.5680       | 491.7876         | 10 |
| 5  | 30.0338         | 413.2143        | 207.1108        | 396.1878        | 198.5975         |                |                  | G    | <b>887.4945</b>  | 444.2509        | <b>870.4680</b> | <b>435.7376</b>  | 869.4839       | 435.2456         | 9  |
| 6  | 30.0338         | 470.2358        | 235.6215        | <b>453.2092</b> | 227.1083         |                |                  | G    | <b>830.4730</b>  | 415.7402        | 813.4465        | 407.2269         | 812.4625       | 406.7349         | 8  |
| 7  | 30.0338         | 527.2572        | 264.1323        | <b>510.2307</b> | 255.6190         |                |                  | G    | <b>773.4516</b>  | 387.2294        | 756.4250        | 378.7162         | 755.4410       | 378.2241         | 7  |
| 8  | 72.0808         | 626.3257        | 313.6665        | 609.2991        | 305.1532         |                |                  | V    | <b>716.4301</b>  | 358.7187        | 699.4036        | 350.2054         | 698.4196       | 349.7134         | 6  |
| 9  | 72.0808         | 725.3941        | 363.2007        | 708.3675        | 354.6874         |                |                  | V    | <b>617.3617</b>  | 309.1845        | 600.3352        | 300.6712         | 599.3511       | 300.1792         | 5  |
| 10 | 74.0600         | <b>826.4417</b> | 413.7245        | 809.4152        | 405.2112         | 808.4312       | 404.7192         | T    | <b>518.2933</b>  | 259.6503        | 501.2667        | 251.1370         | 500.2827       | 250.6450         | 4  |
| 11 | 86.0964         | 939.5258        | 470.2665        | 922.4993        | 461.7533         | 921.5152       | 461.2613         | I    | <b>417.2456</b>  | 209.1264        | 400.2191        | 200.6132         | 399.2350       | 200.1212         | 3  |
| 12 | 102.0550        | 1068.5684       | 534.7878        | 1051.5419       | 526.2746         | 1050.5578      | 525.7826         | E    | 304.1615         | 152.5844        | 287.1350        | 144.0711         | 286.1510       | 143.5791         | 2  |
| 13 | <b>129.1135</b> |                 |                 |                 |                  |                |                  | R    | <b>175.1190</b>  | 88.0631         | 158.0924        | 79.5498          |                |                  | 1  |

MS/MS Fragmentation of **EVMLVGIGDK**

Found in **P36542**, P36542|ATPG\_HUMAN ATP synthase subunit gamma, mitochondrial OS=Homo sapiens  
GN=ATP5C1 PE=1 SV=1

Match to Query 261: 1075.533962 from(538.774257,2,+)

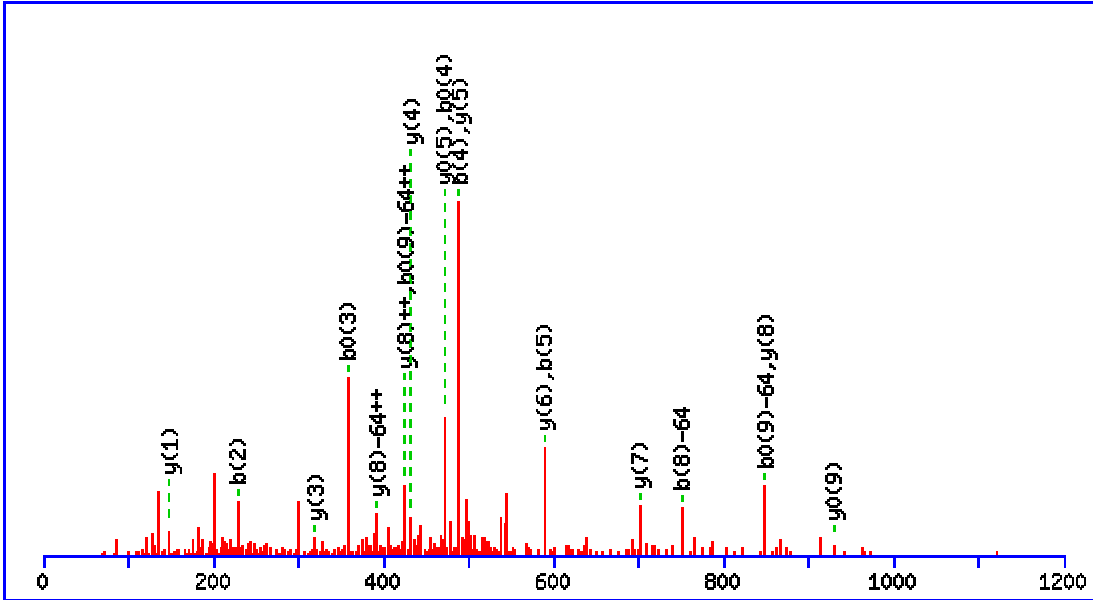

**Monoisotopic mass of neutral peptide Mr(calc):** 1075.5584

**Fixed modifications:** Carbamidomethyl (C)

**Variable modifications:**

**M3** : Oxidation (M), with neutral losses 0.0000(shown in table), 63.9983

**Ions Score:** 40 **Expect:** 0.008

**Matches (Bold Red):** 19/139 fragment ions using 29 most intense peaks

| #  | Immon.   | b               | b <sup>++</sup> | b <sup>0</sup>  | b <sup>0++</sup> | Seq.     | y               | y <sup>++</sup> | y <sup>*</sup> | y <sup>*++</sup> | y <sup>0</sup>  | y <sup>0++</sup> | #         |
|----|----------|-----------------|-----------------|-----------------|------------------|----------|-----------------|-----------------|----------------|------------------|-----------------|------------------|-----------|
| 1  | 102.0550 | 130.0499        | 65.5286         | 112.0393        | 56.5233          | <b>E</b> |                 |                 |                |                  |                 |                  | <b>10</b> |
| 2  | 72.0808  | <b>229.1183</b> | 115.0628        | 211.1077        | 106.0575         | <b>V</b> | 947.5230        | 474.2652        | 930.4965       | 465.7519         | <b>929.5125</b> | 465.2599         | <b>9</b>  |
| 3  | 120.0478 | 376.1537        | 188.5805        | <b>358.1431</b> | 179.5752         | <b>M</b> | <b>848.4546</b> | <b>424.7309</b> | 831.4281       | 416.2177         | 830.4441        | 415.7257         | <b>8</b>  |
| 4  | 86.0964  | <b>489.2378</b> | 245.1225        | <b>471.2272</b> | 236.1172         | <b>L</b> | <b>701.4192</b> | 351.2132        | 684.3927       | 342.7000         | 683.4087        | 342.2080         | <b>7</b>  |
| 5  | 72.0808  | <b>588.3062</b> | 294.6567        | 570.2956        | 285.6514         | <b>V</b> | <b>588.3352</b> | 294.6712        | 571.3086       | 286.1579         | 570.3246        | 285.6659         | <b>6</b>  |
| 6  | 30.0338  | 645.3276        | 323.1675        | 627.3171        | 314.1622         | <b>G</b> | <b>489.2667</b> | 245.1370        | 472.2402       | 236.6237         | <b>471.2562</b> | 236.1317         | <b>5</b>  |
| 7  | 86.0964  | 758.4117        | 379.7095        | 740.4011        | 370.7042         | <b>I</b> | <b>432.2453</b> | 216.6263        | 415.2187       | 208.1130         | 414.2347        | 207.6210         | <b>4</b>  |
| 8  | 30.0338  | 815.4332        | 408.2202        | 797.4226        | 399.2149         | <b>G</b> | <b>319.1612</b> | 160.0842        | 302.1347       | 151.5710         | 301.1506        | 151.0790         | <b>3</b>  |
| 9  | 88.0393  | 930.4601        | 465.7337        | 912.4495        | 456.7284         | <b>D</b> | 262.1397        | 131.5735        | 245.1132       | 123.0602         | 244.1292        | 122.5682         | <b>2</b>  |
| 10 | 101.1073 |                 |                 |                 |                  | <b>K</b> | <b>147.1128</b> | 74.0600         | 130.0863       | 65.5468          |                 |                  | <b>1</b>  |

MS/MS Fragmentation of **AEEDEILNR**

Found in **P27824**, P27824|CALX\_HUMAN Calnexin OS=Homo sapiens GN=CANX PE=1 SV=2

Match to Query 347: 1087.528544 from(544.771548,2+)

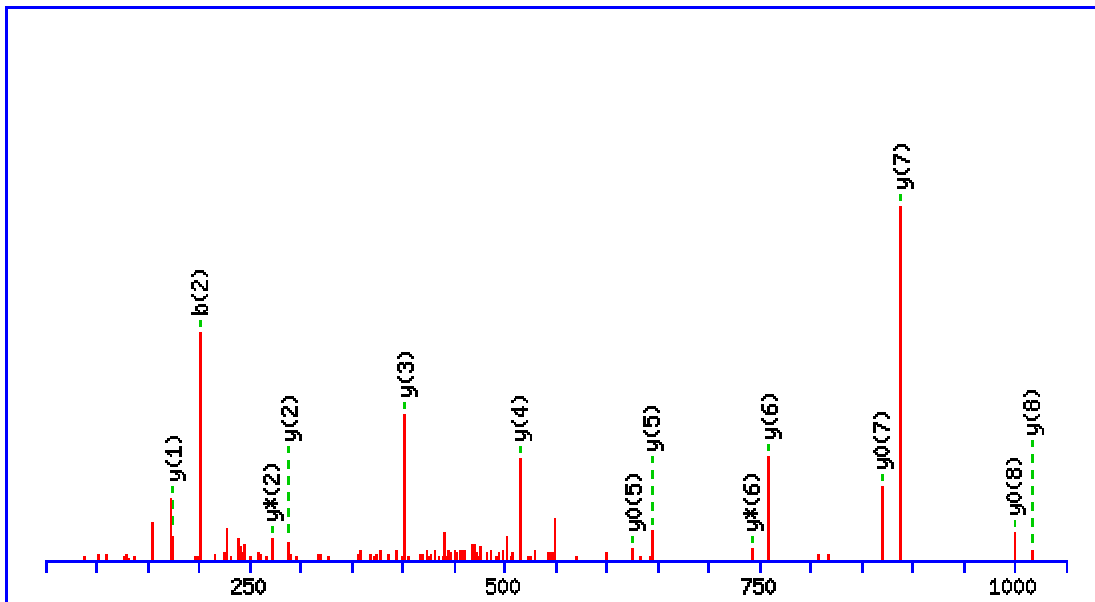

Monoisotopic mass of neutral peptide  $M_r(\text{calc})$ : 1087.5145

Fixed modifications: Carbamidomethyl (C)

Ions Score: 59 Expect: 0.00012

Matches (**Bold Red**): 14/81 fragment ions using 28 most intense peaks

| # | Immon.   | b               | b <sup>++</sup> | b*       | b <sup>*++</sup> | b <sup>0</sup> | b <sup>0++</sup> | Seq. | y                | y <sup>++</sup> | y*              | y <sup>*++</sup> | y <sup>0</sup>  | y <sup>0++</sup> | # |
|---|----------|-----------------|-----------------|----------|------------------|----------------|------------------|------|------------------|-----------------|-----------------|------------------|-----------------|------------------|---|
| 1 | 44.0495  | 72.0444         | 36.5258         |          |                  |                |                  | A    |                  |                 |                 |                  |                 |                  | 9 |
| 2 | 102.0550 | <b>201.0870</b> | 101.0471        |          |                  | 183.0764       | 92.0418          | E    | <b>1017.4847</b> | 509.2460        | 1000.4582       | 500.7327         | <b>999.4742</b> | 500.2407         | 8 |
| 3 | 102.0550 | 330.1296        | 165.5684        |          |                  | 312.1190       | 156.5631         | E    | <b>888.4421</b>  | 444.7247        | 871.4156        | 436.2114         | <b>870.4316</b> | 435.7194         | 7 |
| 4 | 88.0393  | 445.1565        | 223.0819        |          |                  | 427.1460       | 214.0766         | D    | <b>759.3995</b>  | 380.2034        | <b>742.3730</b> | 371.6901         | 741.3890        | 371.1981         | 6 |
| 5 | 102.0550 | 574.1991        | 287.6032        |          |                  | 556.1885       | 278.5979         | E    | <b>644.3726</b>  | 322.6899        | 627.3461        | 314.1767         | <b>626.3620</b> | 313.6847         | 5 |
| 6 | 86.0964  | 687.2832        | 344.1452        |          |                  | 669.2726       | 335.1399         | I    | <b>515.3300</b>  | 258.1686        | 498.3035        | 249.6554         |                 |                  | 4 |
| 7 | 86.0964  | 800.3672        | 400.6873        |          |                  | 782.3567       | 391.6820         | L    | <b>402.2459</b>  | 201.6266        | 385.2194        | 193.1133         |                 |                  | 3 |
| 8 | 87.0553  | 914.4102        | 457.7087        | 897.3836 | 449.1954         | 896.3996       | 448.7034         | N    | <b>289.1619</b>  | 145.0846        | <b>272.1353</b> | 136.5713         |                 |                  | 2 |
| 9 | 129.1135 |                 |                 |          |                  |                |                  | R    | <b>175.1190</b>  | 88.0631         | 158.0924        | 79.5498          |                 |                  | 1 |

MS/MS Fragmentation of **TDAIPGR**

Found in **P00403**, P00403|COX2\_HUMAN Cytochrome c oxidase subunit 2 OS=Homo sapiens GN=MT-CO2  
 PE=1 SV=1

Match to Query 52: 728.417890 from(365.216221,2+)

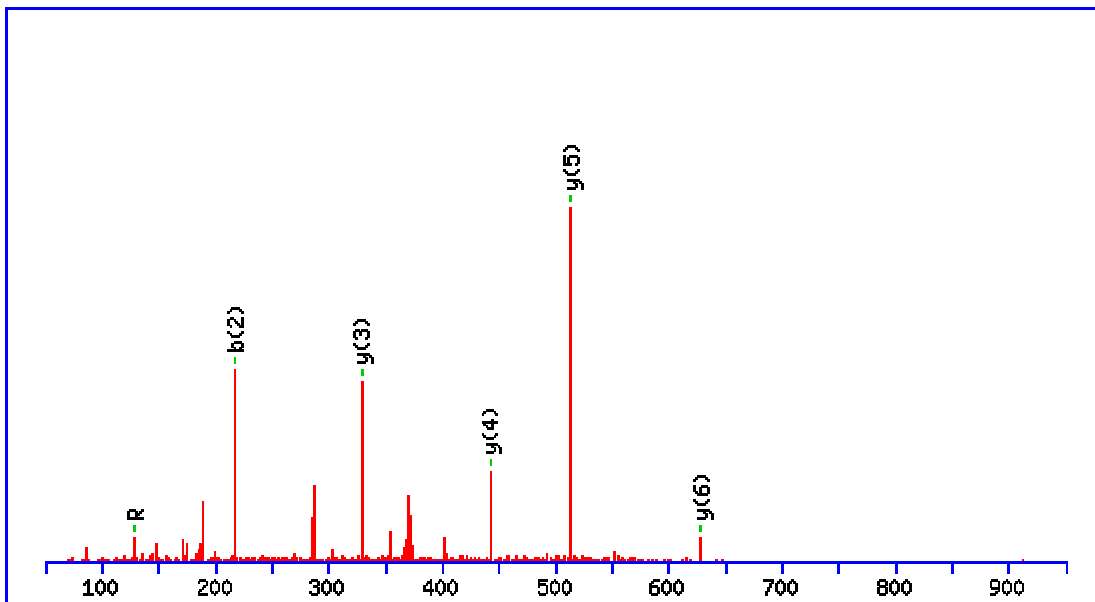

Monoisotopic mass of neutral peptide  $M_r(\text{calc})$ : 728.3817

Fixed modifications: Carbamidomethyl (C)

Ions Score: 42 Expect: 0.0058

Matches (**Bold Red**): 6/57 fragment ions using 7 most intense peaks

| # | Immon.          | b               | b <sup>++</sup> | b <sup>0</sup> | b <sup>0++</sup> | Seq. | y               | y <sup>++</sup> | y <sup>*</sup> | y <sup>*++</sup> | y <sup>0</sup> | y <sup>0++</sup> | # |
|---|-----------------|-----------------|-----------------|----------------|------------------|------|-----------------|-----------------|----------------|------------------|----------------|------------------|---|
| 1 | 74.0600         | 102.0550        | 51.5311         | 84.0444        | 42.5258          | T    |                 |                 |                |                  |                |                  | 7 |
| 2 | 88.0393         | <b>217.0819</b> | 109.0446        | 199.0713       | 100.0393         | D    | <b>628.3413</b> | 314.6743        | 611.3148       | 306.1610         | 610.3307       | 305.6690         | 6 |
| 3 | 44.0495         | 288.1190        | 144.5631        | 270.1084       | 135.5579         | A    | <b>513.3144</b> | 257.1608        | 496.2878       | 248.6475         |                |                  | 5 |
| 4 | 86.0964         | 401.2031        | 201.1052        | 383.1925       | 192.0999         | I    | <b>442.2772</b> | 221.6423        | 425.2507       | 213.1290         |                |                  | 4 |
| 5 | 70.0651         | 498.2558        | 249.6316        | 480.2453       | 240.6263         | P    | <b>329.1932</b> | 165.1002        | 312.1666       | 156.5870         |                |                  | 3 |
| 6 | 30.0338         | 555.2773        | 278.1423        | 537.2667       | 269.1370         | G    | 232.1404        | 116.5738        | 215.1139       | 108.0606         |                |                  | 2 |
| 7 | <b>129.1135</b> |                 |                 |                |                  | R    | 175.1190        | 88.0631         | 158.0924       | 79.5498          |                |                  | 1 |



MS/MS Fragmentation of **LLDVDNR**

Found in **P00403**, P00403|COX2\_HUMAN Cytochrome c oxidase subunit 2 OS=Homo sapiens GN=MT-CO2 PE=1 SV=1

Match to Query 47: 843.368168 from(422.691360,2+)

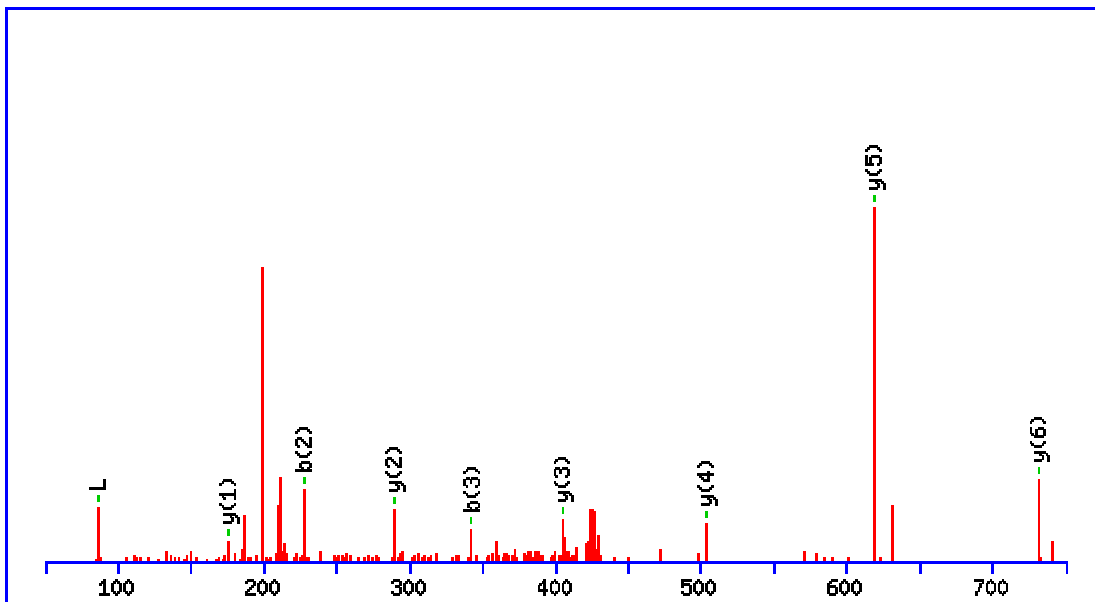

**Monoisotopic mass of neutral peptide Mr(calc):** 843.4450

**Fixed modifications:** Carbamidomethyl (C)

**Ions Score:** 34 **Expect:** 0.039

**Matches (Bold Red):** 10/61 fragment ions using 29 most intense peaks

| # | Immon.         | b               | b <sup>++</sup> | b <sup>*</sup> | b <sup>*++</sup> | b <sup>0</sup> | b <sup>0++</sup> | Seq. | y               | y <sup>++</sup> | y <sup>*</sup> | y <sup>*++</sup> | y <sup>0</sup> | y <sup>0++</sup> | # |
|---|----------------|-----------------|-----------------|----------------|------------------|----------------|------------------|------|-----------------|-----------------|----------------|------------------|----------------|------------------|---|
| 1 | <b>86.0964</b> | 114.0913        | 57.5493         |                |                  |                |                  | L    |                 |                 |                |                  |                |                  | 7 |
| 2 | <b>86.0964</b> | <b>227.1754</b> | 114.0913        |                |                  |                |                  | L    | <b>731.3682</b> | 366.1878        | 714.3417       | 357.6745         | 713.3577       | 357.1825         | 6 |
| 3 | 88.0393        | <b>342.2023</b> | 171.6048        |                |                  | 324.1918       | 162.5995         | D    | <b>618.2842</b> | 309.6457        | 601.2576       | 301.1325         | 600.2736       | 300.6404         | 5 |
| 4 | 72.0808        | 441.2708        | 221.1390        |                |                  | 423.2602       | 212.1337         | V    | <b>503.2572</b> | 252.1323        | 486.2307       | 243.6190         | 485.2467       | 243.1270         | 4 |
| 5 | 88.0393        | 556.2977        | 278.6525        |                |                  | 538.2871       | 269.6472         | D    | <b>404.1888</b> | 202.5980        | 387.1623       | 194.0848         | 386.1783       | 193.5928         | 3 |
| 6 | 87.0553        | 670.3406        | 335.6740        | 653.3141       | 327.1607         | 652.3301       | 326.6687         | N    | <b>289.1619</b> | 145.0846        | 272.1353       | 136.5713         |                |                  | 2 |
| 7 | 129.1135       |                 |                 |                |                  |                |                  | R    | <b>175.1190</b> | 88.0631         | 158.0924       | 79.5498          |                |                  | 1 |

MS/MS Fragmentation of **LVNTSENLSK**

Found in **Q9UEU0**, Q9UEU0|VTI1B\_HUMAN Vesicle transport through interaction with t-SNAREs homolog  
 1B OS=Homo sapiens GN=VTI1B PE=2 SV=3

Match to Query 301: 1103.582372 from(552.798462,2+)

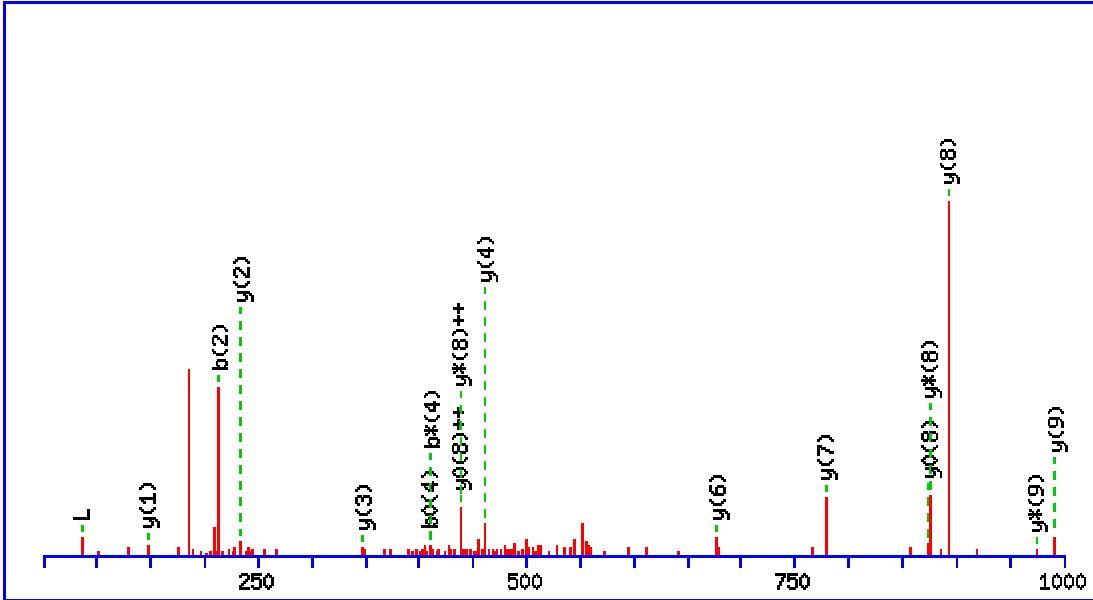

Monoisotopic mass of neutral peptide Mr(calc): 1103.5822

Fixed modifications: Carbamidomethyl (C)

Ions Score: 57 Expect: 0.00015

Matches (Bold Red): 18/106 fragment ions using 42 most intense peaks

| #  | Immon.         | b               | b <sup>++</sup> | b*              | b <sup>+++</sup> | b <sup>0</sup>  | b <sup>0++</sup> | Seq. | y               | y <sup>++</sup> | y*              | y <sup>+++</sup> | y <sup>0</sup>  | y <sup>0++</sup> | #  |
|----|----------------|-----------------|-----------------|-----------------|------------------|-----------------|------------------|------|-----------------|-----------------|-----------------|------------------|-----------------|------------------|----|
| 1  | <b>86.0964</b> | 114.0913        | 57.5493         |                 |                  |                 |                  | L    |                 |                 |                 |                  |                 |                  | 10 |
| 2  | 72.0808        | <b>213.1598</b> | 107.0835        |                 |                  |                 |                  | V    | <b>991.5055</b> | 496.2564        | <b>974.4789</b> | 487.7431         | 973.4949        | 487.2511         | 9  |
| 3  | 87.0553        | 327.2027        | 164.1050        | 310.1761        | 155.5917         |                 |                  | N    | <b>892.4371</b> | 446.7222        | <b>875.4105</b> | <b>438.2089</b>  | <b>874.4265</b> | <b>437.7169</b>  | 8  |
| 4  | 74.0600        | 428.2504        | 214.6288        | <b>411.2238</b> | 206.1155         | <b>410.2398</b> | 205.6235         | T    | <b>778.3941</b> | 389.7007        | 761.3676        | 381.1874         | 760.3836        | 380.6954         | 7  |
| 5  | 60.0444        | 515.2824        | 258.1448        | 498.2558        | 249.6316         | 497.2718        | 249.1395         | S    | <b>677.3464</b> | 339.1769        | 660.3199        | 330.6636         | 659.3359        | 330.1716         | 6  |
| 6  | 102.0550       | 644.3250        | 322.6661        | 627.2984        | 314.1529         | 626.3144        | 313.6608         | E    | 590.3144        | 295.6608        | 573.2879        | 287.1476         | 572.3039        | 286.6556         | 5  |
| 7  | 87.0553        | 758.3679        | 379.6876        | 741.3414        | 371.1743         | 740.3573        | 370.6823         | N    | <b>461.2718</b> | 231.1395        | 444.2453        | 222.6263         | 443.2613        | 222.1343         | 4  |
| 8  | <b>86.0964</b> | 871.4520        | 436.2296        | 854.4254        | 427.7163         | 853.4414        | 427.2243         | L    | <b>347.2289</b> | 174.1181        | 330.2023        | 165.6048         | 329.2183        | 165.1128         | 3  |
| 9  | 60.0444        | 958.4840        | 479.7456        | 941.4575        | 471.2324         | 940.4734        | 470.7404         | S    | <b>234.1448</b> | 117.5761        | 217.1183        | 109.0628         | 216.1343        | 108.5708         | 2  |
| 10 | 101.1073       |                 |                 |                 |                  |                 |                  | K    | <b>147.1128</b> | 74.0600         | 130.0863        | 65.5468          |                 |                  | 1  |

MS/MS Fragmentation of **MGESDDSILR**

Found in **P63220**, P63220|RS21\_HUMAN 40S ribosomal protein S21 OS=Homo sapiens GN=RPS21 PE=1 SV=1

Match to Query 256: 1137.393458 from(569.704005,2+)

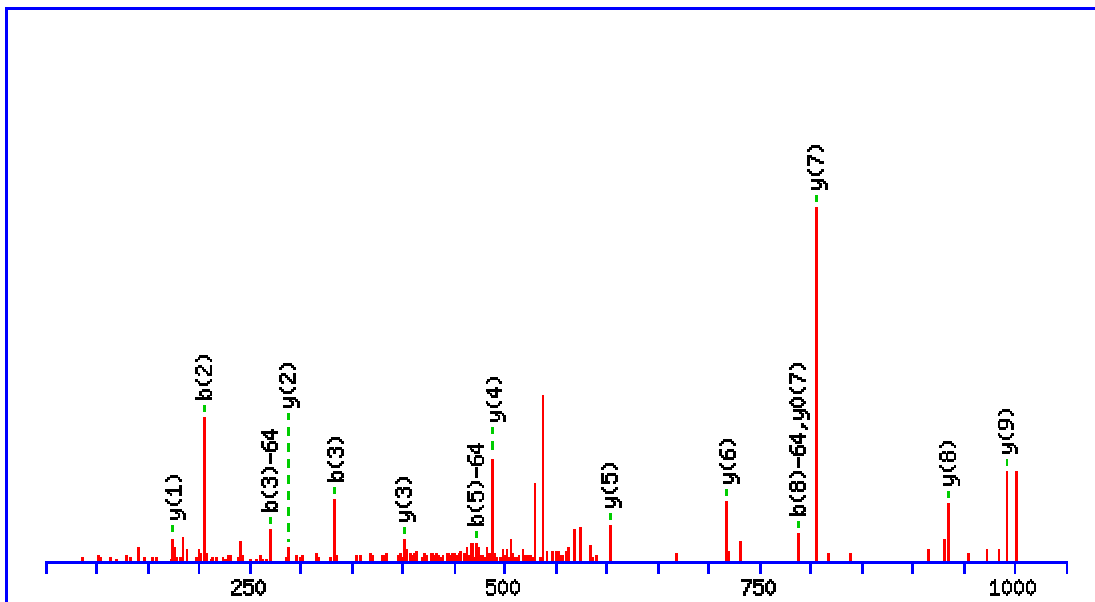

**Monoisotopic mass of neutral peptide Mr(calc):** 1137.4972

**Fixed modifications:** Carbamidomethyl (C)

**Variable modifications:**

**M1** : Oxidation (M), with neutral losses 63.9983(shown in table), 0.0000

**Ions Score:** 81 **Expect:** 4.4e-007

**Matches (Bold Red):** 15/123 fragment ions using 20 most intense peaks

| #  | Immon.   | b               | b <sup>++</sup> | b <sup>0</sup> | b <sup>0++</sup> | Seq. | y               | y <sup>++</sup> | y*       | y <sup>+++</sup> | y <sup>0</sup>  | y <sup>0++</sup> | #  |
|----|----------|-----------------|-----------------|----------------|------------------|------|-----------------|-----------------|----------|------------------|-----------------|------------------|----|
| 1  | 56.0495  | 84.0444         | 42.5258         |                |                  | M    |                 |                 |          |                  |                 |                  | 10 |
| 2  | 30.0338  | 141.0659        | 71.0366         |                |                  | G    | <b>991.4691</b> | 496.2382        | 974.4425 | 487.7249         | 973.4585        | 487.2329         | 9  |
| 3  | 102.0550 | <b>270.1085</b> | 135.5579        | 252.0979       | 126.5526         | E    | <b>934.4476</b> | 467.7274        | 917.4211 | 459.2142         | 916.4370        | 458.7222         | 8  |
| 4  | 60.0444  | 357.1405        | 179.0739        | 339.1299       | 170.0686         | S    | <b>805.4050</b> | 403.2061        | 788.3785 | 394.6929         | <b>787.3945</b> | 394.2009         | 7  |
| 5  | 88.0393  | <b>472.1674</b> | 236.5873        | 454.1569       | 227.5821         | D    | <b>718.3730</b> | 359.6901        | 701.3464 | 351.1769         | 700.3624        | 350.6849         | 6  |
| 6  | 88.0393  | 587.1944        | 294.1008        | 569.1838       | 285.0955         | D    | <b>603.3461</b> | 302.1767        | 586.3195 | 293.6634         | 585.3355        | 293.1714         | 5  |
| 7  | 60.0444  | 674.2264        | 337.6168        | 656.2158       | 328.6116         | S    | <b>488.3191</b> | 244.6632        | 471.2926 | 236.1499         | 470.3085        | 235.6579         | 4  |
| 8  | 86.0964  | <b>787.3105</b> | 394.1589        | 769.2999       | 385.1536         | I    | <b>401.2871</b> | 201.1472        | 384.2605 | 192.6339         |                 |                  | 3  |
| 9  | 86.0964  | 900.3945        | 450.7009        | 882.3840       | 441.6956         | L    | <b>288.2030</b> | 144.6051        | 271.1765 | 136.0919         |                 |                  | 2  |
| 10 | 129.1135 |                 |                 |                |                  | R    | <b>175.1190</b> | 88.0631         | 158.0924 | 79.5498          |                 |                  | 1  |

MS/MS Fragmentation of **LQNNVYTIAK**

Found in **P63010**, P63010|AP2B1\_HUMAN AP-2 complex subunit beta-1 OS=Homo sapiens GN=AP2B1 PE=1 SV=1

Match to Query 588: 1276.635040 from(639.324796,2+)

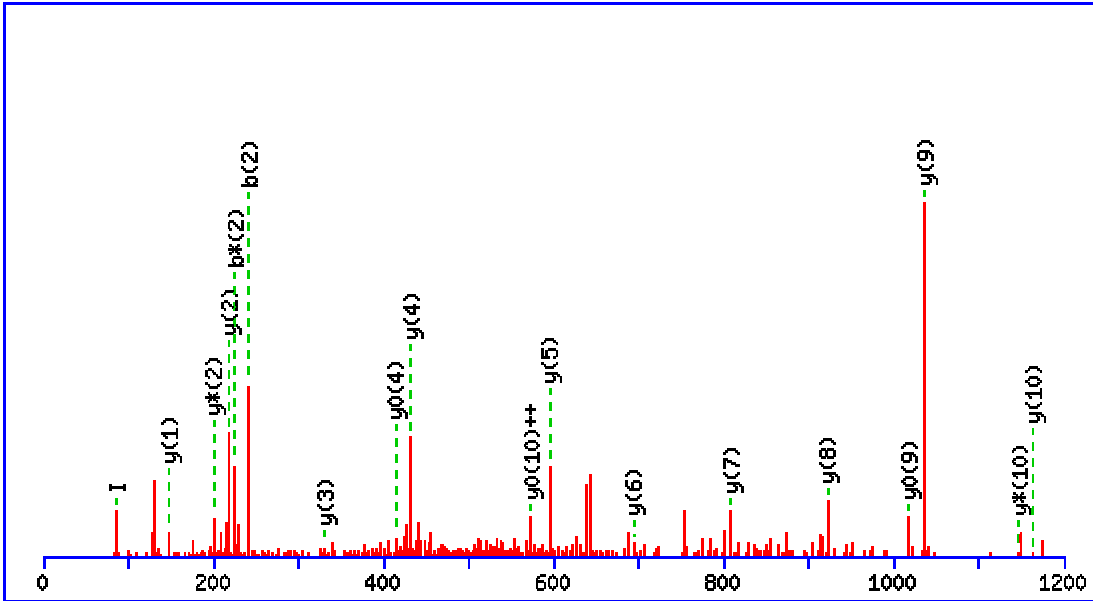

Monoisotopic mass of neutral peptide Mr(calc): 1276.6775

Fixed modifications: Carbamidomethyl (C)

Ions Score: 54 Expect: 0.00031

Matches (Bold Red): 19/109 fragment ions using 49 most intense peaks

| #  | Immon.         | b               | b <sup>++</sup> | b <sup>*</sup>  | b <sup>*++</sup> | b <sup>0</sup> | b <sup>0++</sup> | Seq. | y                | y <sup>++</sup> | y <sup>*</sup>   | y <sup>*++</sup> | y <sup>0</sup>   | y <sup>0++</sup> | #  |
|----|----------------|-----------------|-----------------|-----------------|------------------|----------------|------------------|------|------------------|-----------------|------------------|------------------|------------------|------------------|----|
| 1  | <b>86.0964</b> | 114.0913        | 57.5493         |                 |                  |                |                  | L    |                  |                 |                  |                  |                  |                  | 11 |
| 2  | 101.0709       | <b>242.1499</b> | 121.5786        | <b>225.1234</b> | 113.0653         |                |                  | Q    | <b>1164.6008</b> | 582.8040        | <b>1147.5742</b> | 574.2907         | 1146.5902        | <b>573.7987</b>  | 10 |
| 3  | 87.0553        | 356.1928        | 178.6001        | 339.1663        | 170.0868         |                |                  | N    | <b>1036.5422</b> | 518.7747        | 1019.5156        | 510.2615         | <b>1018.5316</b> | 509.7694         | 9  |
| 4  | 87.0553        | 470.2358        | 235.6215        | 453.2092        | 227.1082         |                |                  | N    | <b>922.4993</b>  | 461.7533        | 905.4727         | 453.2400         | 904.4887         | 452.7480         | 8  |
| 5  | 87.0553        | 584.2787        | 292.6430        | 567.2522        | 284.1297         |                |                  | N    | <b>808.4563</b>  | 404.7318        | 791.4298         | 396.2185         | 790.4458         | 395.7265         | 7  |
| 6  | 72.0808        | 683.3471        | 342.1772        | 666.3206        | 333.6639         |                |                  | V    | <b>694.4134</b>  | 347.7103        | 677.3869         | 339.1971         | 676.4028         | 338.7051         | 6  |
| 7  | 136.0757       | 846.4104        | 423.7089        | 829.3839        | 415.1956         |                |                  | Y    | <b>595.3450</b>  | 298.1761        | 578.3184         | 289.6629         | 577.3344         | 289.1709         | 5  |
| 8  | 74.0600        | 947.4581        | 474.2327        | 930.4316        | 465.7194         | 929.4476       | 465.2274         | T    | <b>432.2817</b>  | 216.6445        | 415.2551         | 208.1312         | <b>414.2711</b>  | 207.6392         | 4  |
| 9  | <b>86.0964</b> | 1060.5422       | 530.7747        | 1043.5156       | 522.2615         | 1042.5316      | 521.7694         | I    | <b>331.2340</b>  | 166.1206        | 314.2074         | 157.6074         |                  |                  | 3  |
| 10 | 44.0495        | 1131.5793       | 566.2933        | 1114.5528       | 557.7800         | 1113.5687      | 557.2880         | A    | <b>218.1499</b>  | 109.5786        | <b>201.1234</b>  | 101.0653         |                  |                  | 2  |
| 11 | 101.1073       |                 |                 |                 |                  |                |                  | K    | <b>147.1128</b>  | 74.0600         | 130.0863         | 65.5468          |                  |                  | 1  |

MS/MS Fragmentation of **IEANEALVK**

Found in **P30049**, P30049|ATPD\_HUMAN ATP synthase subunit delta, mitochondrial OS=Homo sapiens  
 GN=ATP5D PE=1 SV=2

Match to Query 96: 985.432808 from(493.723680,2+)

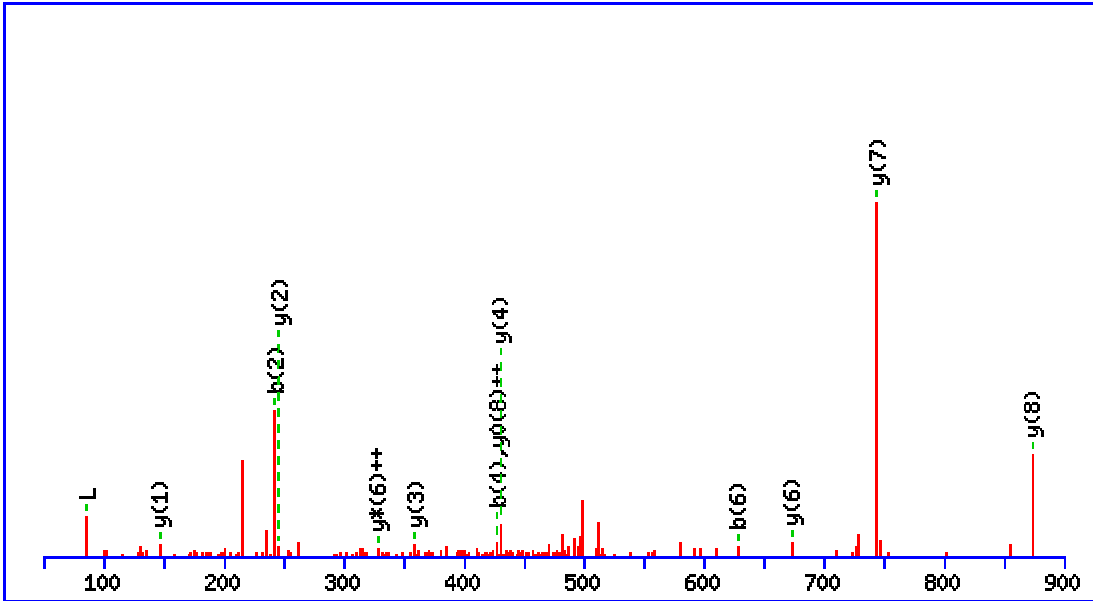

Monoisotopic mass of neutral peptide Mr(calc): 985.5444

Fixed modifications: Carbamidomethyl (C)

Ions Score: 51 Expect: 0.00065

Matches (Bold Red): 14/89 fragment ions using 22 most intense peaks

| # | Immon.         | b               | b <sup>++</sup> | b*       | b <sup>*++</sup> | b <sup>0</sup> | b <sup>0++</sup> | Seq. | y               | y <sup>++</sup> | y*       | y <sup>*++</sup> | y <sup>0</sup> | y <sup>0++</sup> | # |
|---|----------------|-----------------|-----------------|----------|------------------|----------------|------------------|------|-----------------|-----------------|----------|------------------|----------------|------------------|---|
| 1 | <b>86.0964</b> | 114.0913        | 57.5493         |          |                  |                |                  | I    |                 |                 |          |                  |                |                  | 9 |
| 2 | 102.0550       | <b>243.1339</b> | 122.0706        |          |                  | 225.1234       | 113.0653         | E    | <b>873.4676</b> | 437.2374        | 856.4411 | 428.7242         | 855.4571       | <b>428.2322</b>  | 8 |
| 3 | 44.0495        | 314.1710        | 157.5892        |          |                  | 296.1605       | 148.5839         | A    | <b>744.4250</b> | 372.7162        | 727.3985 | 364.2029         | 726.4145       | 363.7109         | 7 |
| 4 | 87.0553        | <b>428.2140</b> | 214.6106        | 411.1874 | 206.0974         | 410.2034       | 205.6053         | N    | <b>673.3879</b> | 337.1976        | 656.3614 | <b>328.6843</b>  | 655.3774       | 328.1923         | 6 |
| 5 | 102.0550       | 557.2566        | 279.1319        | 540.2300 | 270.6186         | 539.2460       | 270.1266         | E    | 559.3450        | 280.1761        | 542.3184 | 271.6629         | 541.3344       | 271.1709         | 5 |
| 6 | 44.0495        | <b>628.2937</b> | 314.6505        | 611.2671 | 306.1372         | 610.2831       | 305.6452         | A    | <b>430.3024</b> | 215.6548        | 413.2758 | 207.1416         |                |                  | 4 |
| 7 | <b>86.0964</b> | 741.3777        | 371.1925        | 724.3512 | 362.6792         | 723.3672       | 362.1872         | L    | <b>359.2653</b> | 180.1363        | 342.2387 | 171.6230         |                |                  | 3 |
| 8 | 72.0808        | 840.4462        | 420.7267        | 823.4196 | 412.2134         | 822.4356       | 411.7214         | V    | <b>246.1812</b> | 123.5942        | 229.1547 | 115.0810         |                |                  | 2 |
| 9 | 101.1073       |                 |                 |          |                  |                |                  | K    | <b>147.1128</b> | 74.0600         | 130.0863 | 65.5468          |                |                  | 1 |

MS/MS Fragmentation of **AQAELVGTADEATR**

Found in **P30049**, P30049|ATPD\_HUMAN ATP synthase subunit delta, mitochondrial OS=Homo sapiens  
GN=ATP5D PE=1 SV=2

Match to Query 368: 1430.626790 from(716.320671,2+)

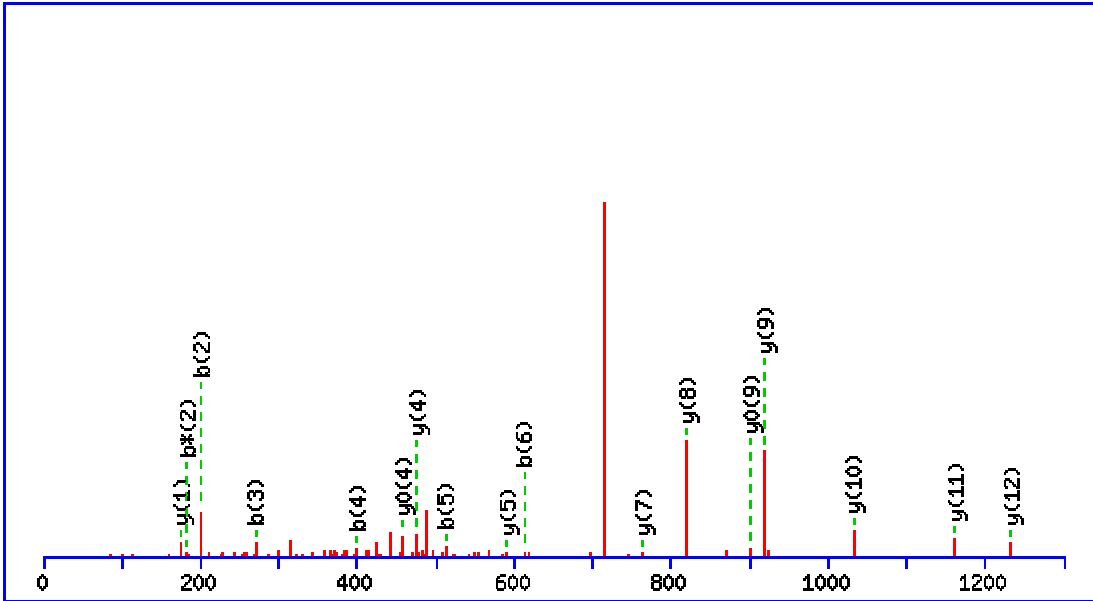

Monoisotopic mass of neutral peptide Mr(calc): 1430.7001

Fixed modifications: Carbamidomethyl (C)

Ions Score: 59 Expect: 9e-005

Matches (Bold Red): 17/160 fragment ions using 33 most intense peaks

| #  | Immon.   | b               | b <sup>++</sup> | b <sup>*</sup>  | b <sup>*++</sup> | b <sup>0</sup> | b <sup>0++</sup> | Seq. | y                | y <sup>++</sup> | y <sup>*</sup> | y <sup>*++</sup> | y <sup>0</sup>  | y <sup>0++</sup> | #  |
|----|----------|-----------------|-----------------|-----------------|------------------|----------------|------------------|------|------------------|-----------------|----------------|------------------|-----------------|------------------|----|
| 1  | 44.0495  | 72.0444         | 36.5258         |                 |                  |                |                  | A    |                  |                 |                |                  |                 |                  | 14 |
| 2  | 101.0709 | <b>200.1030</b> | 100.5551        | <b>183.0764</b> | 92.0418          |                |                  | Q    | 1360.6703        | 680.8388        | 1343.6438      | 672.3255         | 1342.6597       | 671.8335         | 13 |
| 3  | 44.0495  | <b>271.1401</b> | 136.0737        | 254.1135        | 127.5604         |                |                  | A    | <b>1232.6117</b> | 616.8095        | 1215.5852      | 608.2962         | 1214.6012       | 607.8042         | 12 |
| 4  | 102.0550 | <b>400.1827</b> | 200.5950        | 383.1561        | 192.0817         | 382.1721       | 191.5897         | E    | <b>1161.5746</b> | 581.2909        | 1144.5481      | 572.7777         | 1143.5640       | 572.2857         | 11 |
| 5  | 86.0964  | <b>513.2667</b> | 257.1370        | 496.2402        | 248.6237         | 495.2562       | 248.1317         | L    | <b>1032.5320</b> | 516.7696        | 1015.5055      | 508.2564         | 1014.5215       | 507.7644         | 10 |
| 6  | 72.0808  | <b>612.3352</b> | 306.6712        | 595.3086        | 298.1579         | 594.3246       | 297.6659         | V    | <b>919.4480</b>  | 460.2276        | 902.4214       | 451.7143         | <b>901.4374</b> | 451.2223         | 9  |
| 7  | 30.0338  | 669.3566        | 335.1819        | 652.3301        | 326.6687         | 651.3461       | 326.1767         | G    | <b>820.3795</b>  | 410.6934        | 803.3530       | 402.1801         | 802.3690        | 401.6881         | 8  |
| 8  | 74.0600  | 770.4043        | 385.7058        | 753.3777        | 377.1925         | 752.3937       | 376.7005         | T    | <b>763.3581</b>  | 382.1827        | 746.3315       | 373.6694         | 745.3475        | 373.1774         | 7  |
| 9  | 44.0495  | 841.4414        | 421.2243        | 824.4149        | 412.7111         | 823.4308       | 412.2191         | A    | 662.3104         | 331.6588        | 645.2838       | 323.1456         | 644.2998        | 322.6536         | 6  |
| 10 | 88.0393  | 956.4684        | 478.7378        | 939.4418        | 470.2245         | 938.4578       | 469.7325         | D    | <b>591.2733</b>  | 296.1403        | 574.2467       | 287.6270         | 573.2627        | 287.1350         | 5  |
| 11 | 102.0550 | 1085.5109       | 543.2591        | 1068.4844       | 534.7458         | 1067.5004      | 534.2538         | E    | <b>476.2463</b>  | 238.6268        | 459.2198       | 230.1135         | <b>458.2358</b> | 229.6215         | 4  |
| 12 | 44.0495  | 1156.5481       | 578.7777        | 1139.5215       | 570.2644         | 1138.5375      | 569.7724         | A    | 347.2037         | 174.1055        | 330.1772       | 165.5922         | 329.1932        | 165.1002         | 3  |
| 13 | 74.0600  | 1257.5957       | 629.3015        | 1240.5692       | 620.7882         | 1239.5852      | 620.2962         | T    | 276.1666         | 138.5870        | 259.1401       | 130.0737         | 258.1561        | 129.5817         | 2  |
| 14 | 129.1135 |                 |                 |                 |                  |                |                  | R    | <b>175.1190</b>  | 88.0631         | 158.0924       | 79.5498          |                 |                  | 1  |

MS/MS Fragmentation of **ILLTEPPMNPTK**

Found in **P61160**, P61160|ARP2\_HUMAN Actin-related protein 2 OS=Homo sapiens GN=ACTR2 PE=1 SV=1

Match to Query 327: 1368.953878 from(685.484215,2+)

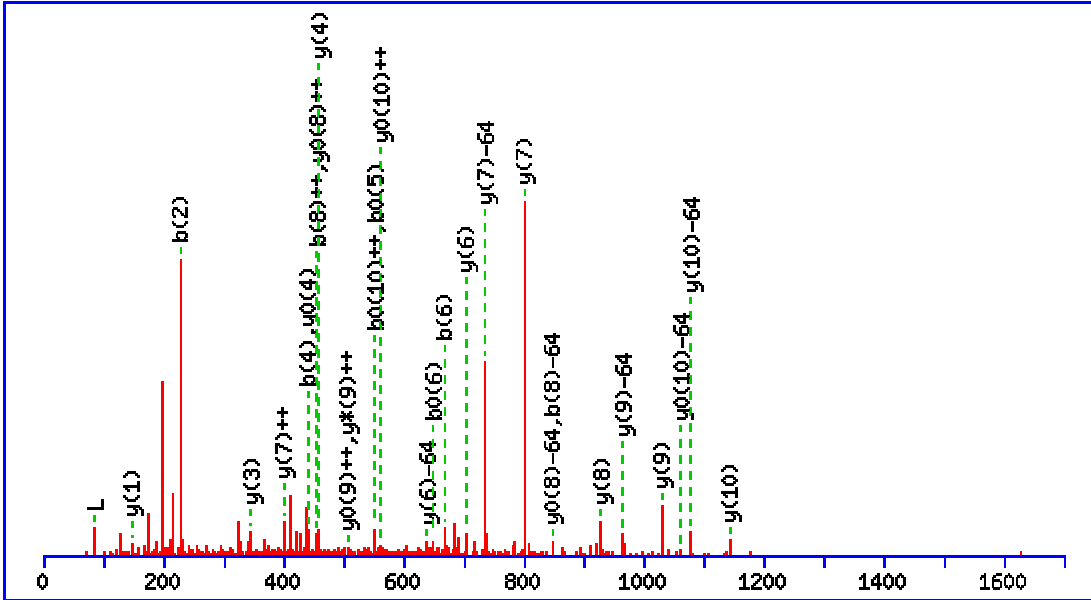

Monoisotopic mass of neutral peptide Mr(calc): 1368.7323

Fixed modifications: Carbamidomethyl (C)

Variable modifications:

M8 : Oxidation (M), with neutral losses 0.0000(shown in table), 63.9983

Ions Score: 34 Expect: 0.023

Matches (Bold Red): 31/185 fragment ions using 44 most intense peaks

| #  | Immon.         | b               | b <sup>++</sup> | b <sup>*</sup> | b <sup>*++</sup> | b <sup>0</sup>  | b <sup>0++</sup> | Seq. | y                | y <sup>++</sup> | y <sup>*</sup> | y <sup>*++</sup> | y <sup>0</sup>  | y <sup>0++</sup> | #  |
|----|----------------|-----------------|-----------------|----------------|------------------|-----------------|------------------|------|------------------|-----------------|----------------|------------------|-----------------|------------------|----|
| 1  | <b>86.0964</b> | 114.0913        | 57.5493         |                |                  |                 |                  | I    |                  |                 |                |                  |                 |                  | 12 |
| 2  | <b>86.0964</b> | <b>227.1754</b> | 114.0913        |                |                  |                 |                  | L    | 1256.6555        | 628.8314        | 1239.6290      | 620.3181         | 1238.6449       | 619.8261         | 11 |
| 3  | <b>86.0964</b> | 340.2595        | 170.6334        |                |                  |                 |                  | L    | <b>1143.5714</b> | 572.2894        | 1126.5449      | 563.7761         | 1125.5609       | <b>563.2841</b>  | 10 |
| 4  | 74.0600        | <b>441.3071</b> | 221.1572        |                |                  | 423.2966        | 212.1519         | T    | <b>1030.4874</b> | 515.7473        | 1013.4608      | <b>507.2341</b>  | 1012.4768       | <b>506.7420</b>  | 9  |
| 5  | 102.0550       | 570.3497        | 285.6785        |                |                  | <b>552.3392</b> | 276.6732         | E    | <b>929.4397</b>  | 465.2235        | 912.4132       | 456.7102         | 911.4291        | <b>456.2182</b>  | 8  |
| 6  | 70.0651        | <b>667.4025</b> | 334.2049        |                |                  | <b>649.3919</b> | 325.1996         | P    | <b>800.3971</b>  | <b>400.7022</b> | 783.3706       | 392.1889         | 782.3865        | 391.6969         | 7  |
| 7  | 70.0651        | 764.4553        | 382.7313        |                |                  | 746.4447        | 373.7260         | P    | <b>703.3443</b>  | 352.1758        | 686.3178       | 343.6625         | 685.3338        | 343.1705         | 6  |
| 8  | 120.0478       | 911.4907        | <b>456.2490</b> |                |                  | 893.4801        | 447.2437         | M    | 606.2916         | 303.6494        | 589.2650       | 295.1362         | 588.2810        | 294.6441         | 5  |
| 9  | 87.0553        | 1025.5336       | 513.2704        | 1008.5071      | 504.7572         | 1007.5230       | 504.2652         | N    | <b>459.2562</b>  | 230.1317        | 442.2296       | 221.6185         | <b>441.2456</b> | 221.1264         | 4  |
| 10 | 70.0651        | 1122.5864       | 561.7968        | 1105.5598      | 553.2835         | 1104.5758       | <b>552.7915</b>  | P    | <b>345.2132</b>  | 173.1103        | 328.1867       | 164.5970         | 327.2027        | 164.1050         | 3  |
| 11 | 74.0600        | 1223.6340       | 612.3207        | 1206.6075      | 603.8074         | 1205.6235       | 603.3154         | T    | 248.1605         | 124.5839        | 231.1339       | 116.0706         | 230.1499        | 115.5786         | 2  |
| 12 | 101.1073       |                 |                 |                |                  |                 |                  | K    | <b>147.1128</b>  | 74.0600         | 130.0863       | 65.5468          |                 |                  | 1  |

MS/MS Fragmentation of **VGNIIEIK**

Found in **P61160**, P61160|ARP2\_HUMAN Actin-related protein 2 OS=Homo sapiens GN=ACTR2 PE=1 SV=1

Match to Query 66: 771.414454 from(386.714503,2+)

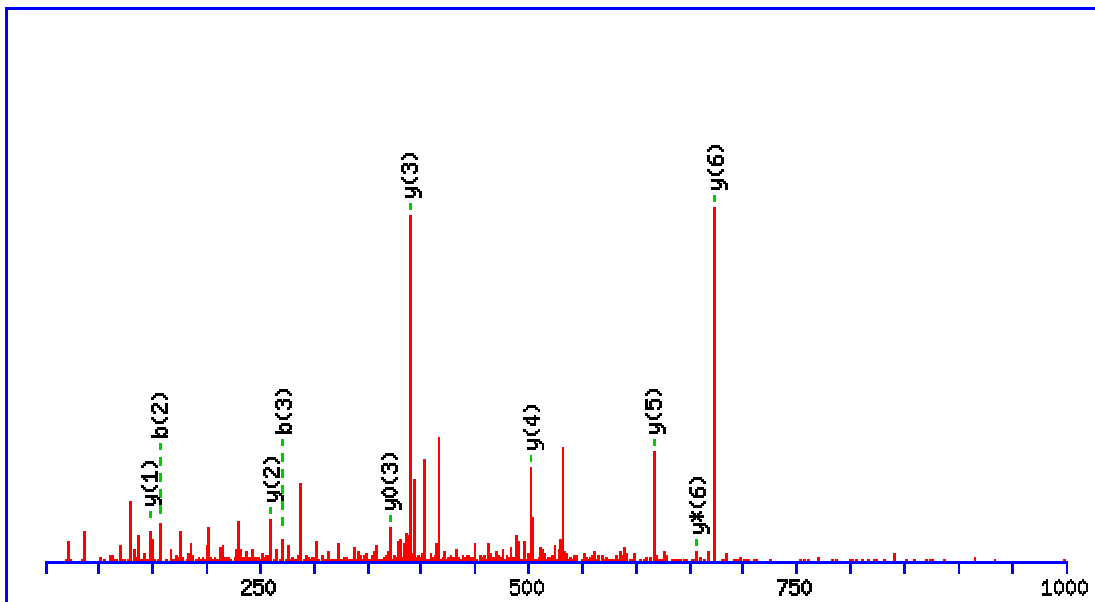

**Monoisotopic mass of neutral peptide Mr(calc):** 771.4490

**Fixed modifications:** Carbamidomethyl (C)

**Ions Score:** 40 **Expect:** 0.01

**Matches (Bold Red):** 10/63 fragment ions using 30 most intense peaks

| # | Immon.   | b               | b <sup>++</sup> | b <sup>*</sup> | b <sup>*++</sup> | b <sup>0</sup> | b <sup>0++</sup> | Seq. | y               | y <sup>++</sup> | y <sup>*</sup>  | y <sup>*++</sup> | y <sup>0</sup>  | y <sup>0++</sup> | # |
|---|----------|-----------------|-----------------|----------------|------------------|----------------|------------------|------|-----------------|-----------------|-----------------|------------------|-----------------|------------------|---|
| 1 | 72.0808  | 100.0757        | 50.5415         |                |                  |                |                  | V    |                 |                 |                 |                  |                 |                  | 7 |
| 2 | 30.0338  | <b>157.0972</b> | 79.0522         |                |                  |                |                  | G    | <b>673.3879</b> | 337.1976        | <b>656.3614</b> | 328.6843         | 655.3774        | 328.1923         | 6 |
| 3 | 87.0553  | <b>271.1401</b> | 136.0737        | 254.1135       | 127.5604         |                |                  | N    | <b>616.3665</b> | 308.6869        | 599.3399        | 300.1736         | 598.3559        | 299.6816         | 5 |
| 4 | 86.0964  | 384.2241        | 192.6157        | 367.1976       | 184.1024         |                |                  | I    | <b>502.3235</b> | 251.6654        | 485.2970        | 243.1521         | 484.3130        | 242.6601         | 4 |
| 5 | 102.0550 | 513.2667        | 257.1370        | 496.2402       | 248.6237         | 495.2562       | 248.1317         | E    | <b>389.2395</b> | 195.1234        | 372.2129        | 186.6101         | <b>371.2289</b> | 186.1181         | 3 |
| 6 | 86.0964  | 626.3508        | 313.6790        | 609.3243       | 305.1658         | 608.3402       | 304.6738         | I    | <b>260.1969</b> | 130.6021        | 243.1703        | 122.0888         |                 |                  | 2 |
| 7 | 101.1073 |                 |                 |                |                  |                |                  | K    | <b>147.1128</b> | 74.0600         | 130.0863        | 65.5468          |                 |                  | 1 |



MS/MS Fragmentation of **ALAAGGVGSIVR**

Found in **O15511**, O15511|ARPC5\_HUMAN Actin-related protein 2/3 complex subunit 5 OS=Homo sapiens  
 GN=ARPC5 PE=1 SV=3

Match to Query 377: 1069.622170 from(535.818361,2,+)

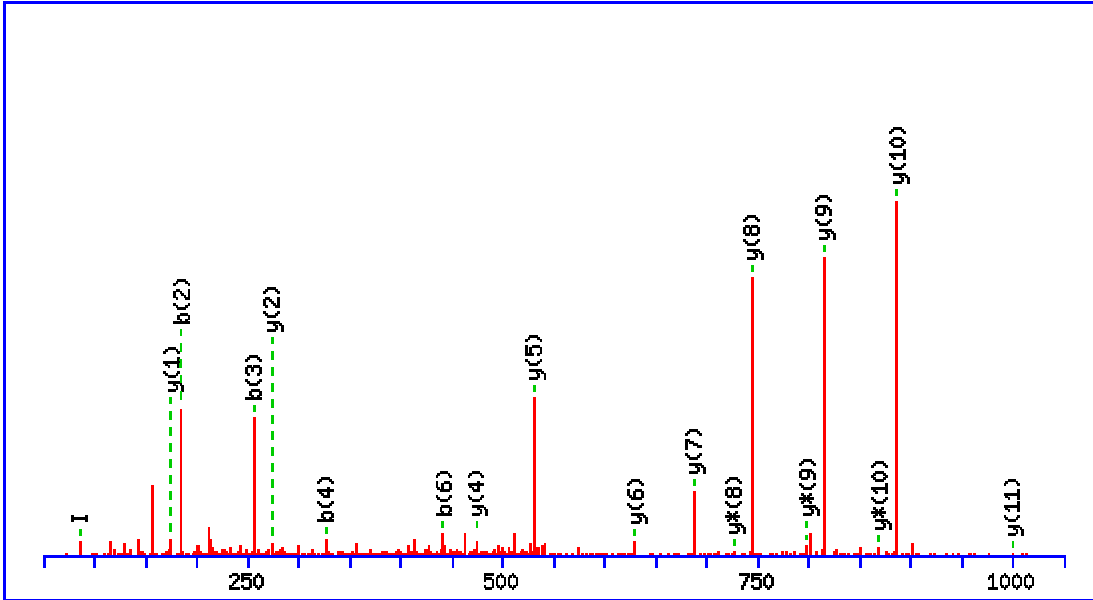

Monoisotopic mass of neutral peptide Mr(calc): 1069.6244

Fixed modifications: Carbamidomethyl (C)

Ions Score: 68 Expect: 1.3e-005

Matches (Bold Red): 19/100 fragment ions using 43 most intense peaks

| #  | Immon.         | b               | b <sup>++</sup> | b <sup>0</sup> | b <sup>0++</sup> | Seq. | y               | y <sup>++</sup> | y <sup>*</sup>  | y <sup>*++</sup> | y <sup>0</sup> | y <sup>0++</sup> | #  |
|----|----------------|-----------------|-----------------|----------------|------------------|------|-----------------|-----------------|-----------------|------------------|----------------|------------------|----|
| 1  | 44.0495        | 72.0444         | 36.5258         |                |                  | A    |                 |                 |                 |                  |                |                  | 12 |
| 2  | <b>86.0964</b> | <b>185.1285</b> | 93.0679         |                |                  | L    | <b>999.5946</b> | 500.3009        | 982.5680        | 491.7876         | 981.5840       | 491.2956         | 11 |
| 3  | 44.0495        | <b>256.1656</b> | 128.5864        |                |                  | A    | <b>886.5105</b> | 443.7589        | <b>869.4839</b> | 435.2456         | 868.4999       | 434.7536         | 10 |
| 4  | 44.0495        | <b>327.2027</b> | 164.1050        |                |                  | A    | <b>815.4734</b> | 408.2403        | <b>798.4468</b> | 399.7271         | 797.4628       | 399.2350         | 9  |
| 5  | 30.0338        | 384.2241        | 192.6157        |                |                  | G    | <b>744.4363</b> | 372.7218        | <b>727.4097</b> | 364.2085         | 726.4257       | 363.7165         | 8  |
| 6  | 30.0338        | <b>441.2456</b> | 221.1264        |                |                  | G    | <b>687.4148</b> | 344.2110        | 670.3883        | 335.6978         | 669.4042       | 335.2058         | 7  |
| 7  | 72.0808        | 540.3140        | 270.6607        |                |                  | V    | <b>630.3933</b> | 315.7003        | 613.3668        | 307.1870         | 612.3828       | 306.6950         | 6  |
| 8  | 30.0338        | 597.3355        | 299.1714        |                |                  | G    | <b>531.3249</b> | 266.1661        | 514.2984        | 257.6528         | 513.3144       | 257.1608         | 5  |
| 9  | 60.0444        | 684.3675        | 342.6874        | 666.3570       | 333.6821         | S    | <b>474.3035</b> | 237.6554        | 457.2769        | 229.1421         | 456.2929       | 228.6501         | 4  |
| 10 | <b>86.0964</b> | 797.4516        | 399.2294        | 779.4410       | 390.2241         | I    | 387.2714        | 194.1394        | 370.2449        | 185.6261         |                |                  | 3  |
| 11 | 72.0808        | 896.5200        | 448.7636        | 878.5094       | 439.7584         | V    | <b>274.1874</b> | 137.5973        | 257.1608        | 129.0840         |                |                  | 2  |
| 12 | 129.1135       |                 |                 |                |                  | R    | <b>175.1190</b> | 88.0631         | 158.0924        | 79.5498          |                |                  | 1  |

MS/MS Fragmentation of **VLTEIIASR**

Found in **P08758**, P08758|ANXA5\_HUMAN Annexin A5 OS=Homo sapiens GN=ANXA5 PE=1 SV=2

Match to Query 377: 1000.576104 from(501.295328,2+)

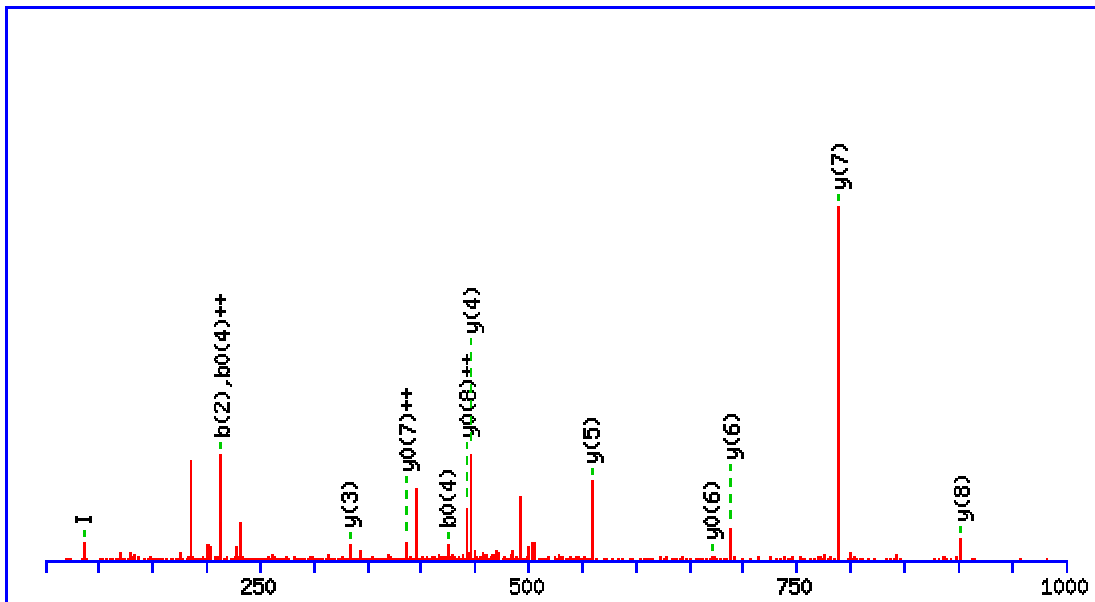

Monoisotopic mass of neutral peptide **Mr(calc)**: 1000.5917

Fixed modifications: Carbamidomethyl (C)

Ions Score: 50 Expect: 0.00086

Matches (**Bold Red**): 15/83 fragment ions using 18 most intense peaks

| # | Immon.         | b               | b <sup>++</sup> | b <sup>0</sup>  | b <sup>0++</sup> | Seq. | y               | y <sup>++</sup> | y <sup>*</sup> | y <sup>*++</sup> | y <sup>0</sup>  | y <sup>0++</sup> | # |
|---|----------------|-----------------|-----------------|-----------------|------------------|------|-----------------|-----------------|----------------|------------------|-----------------|------------------|---|
| 1 | 72.0808        | 100.0757        | 50.5415         |                 |                  | V    |                 |                 |                |                  |                 |                  | 9 |
| 2 | <b>86.0964</b> | <b>213.1598</b> | 107.0835        |                 |                  | L    | <b>902.5306</b> | 451.7689        | 885.5040       | 443.2556         | 884.5200        | <b>442.7636</b>  | 8 |
| 3 | 74.0600        | 314.2074        | 157.6074        | 296.1969        | 148.6021         | T    | <b>789.4465</b> | 395.2269        | 772.4199       | 386.7136         | 771.4359        | <b>386.2216</b>  | 7 |
| 4 | 102.0550       | 443.2500        | 222.1287        | <b>425.2395</b> | <b>213.1234</b>  | E    | <b>688.3988</b> | 344.7030        | 671.3723       | 336.1898         | <b>670.3882</b> | 335.6978         | 6 |
| 5 | <b>86.0964</b> | 556.3341        | 278.6707        | 538.3235        | 269.6654         | I    | <b>559.3562</b> | 280.1817        | 542.3297       | 271.6685         | 541.3457        | 271.1765         | 5 |
| 6 | <b>86.0964</b> | 669.4182        | 335.2127        | 651.4076        | 326.2074         | I    | <b>446.2722</b> | 223.6397        | 429.2456       | 215.1264         | 428.2616        | 214.6344         | 4 |
| 7 | 44.0495        | 740.4553        | 370.7313        | 722.4447        | 361.7260         | A    | <b>333.1881</b> | 167.0977        | 316.1615       | 158.5844         | 315.1775        | 158.0924         | 3 |
| 8 | 60.0444        | 827.4873        | 414.2473        | 809.4767        | 405.2420         | S    | 262.1510        | 131.5791        | 245.1244       | 123.0659         | 244.1404        | 122.5738         | 2 |
| 9 | 129.1135       |                 |                 |                 |                  | R    | 175.1190        | 88.0631         | 158.0924       | 79.5498          |                 |                  | 1 |

MS/MS Fragmentation of **FFVSSSQGR**

Found in **P35613**, P35613|BASI\_HUMAN Basigin OS=Homo sapiens GN=BSG PE=1 SV=2

Match to Query 226: 1013.484538 from(507.749545,2+)

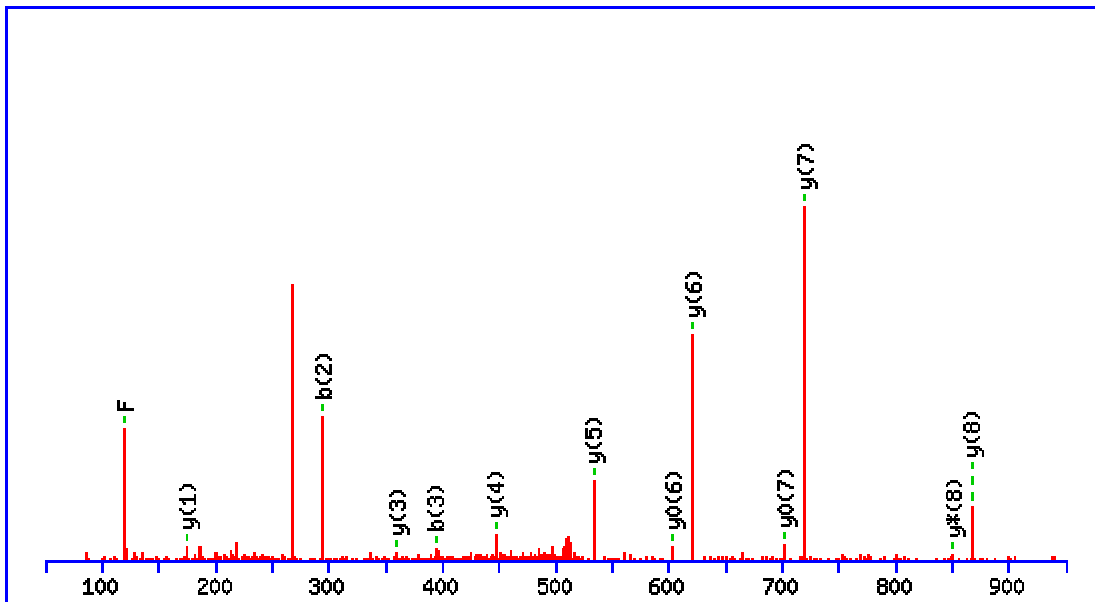

Monoisotopic mass of neutral peptide  $M_r(\text{calc})$ : 1013.4931

Fixed modifications: Carbamidomethyl (C)

Ions Score: 60 Expect: 8.6e-005

Matches (**Bold Red**): 14/81 fragment ions using 19 most intense peaks

| # | Immon.          | b               | b <sup>++</sup> | b*       | b <sup>*++</sup> | b <sup>0</sup> | b <sup>0++</sup> | Seq. | y               | y <sup>++</sup> | y*              | y <sup>*++</sup> | y <sup>0</sup>  | y <sup>0++</sup> | # |
|---|-----------------|-----------------|-----------------|----------|------------------|----------------|------------------|------|-----------------|-----------------|-----------------|------------------|-----------------|------------------|---|
| 1 | <b>120.0808</b> | 148.0757        | 74.5415         |          |                  |                |                  | F    |                 |                 |                 |                  |                 |                  | 9 |
| 2 | <b>120.0808</b> | <b>295.1441</b> | 148.0757        |          |                  |                |                  | F    | <b>867.4319</b> | 434.2196        | <b>850.4054</b> | 425.7063         | 849.4213        | 425.2143         | 8 |
| 3 | 72.0808         | <b>394.2125</b> | 197.6099        |          |                  |                |                  | V    | <b>720.3635</b> | 360.6854        | 703.3369        | 352.1721         | <b>702.3529</b> | 351.6801         | 7 |
| 4 | 60.0444         | 481.2445        | 241.1259        |          |                  | 463.2340       | 232.1206         | S    | <b>621.2951</b> | 311.1512        | 604.2685        | 302.6379         | <b>603.2845</b> | 302.1459         | 6 |
| 5 | 60.0444         | 568.2766        | 284.6419        |          |                  | 550.2660       | 275.6366         | S    | <b>534.2631</b> | 267.6352        | 517.2365        | 259.1219         | 516.2525        | 258.6299         | 5 |
| 6 | 60.0444         | 655.3086        | 328.1579        |          |                  | 637.2980       | 319.1527         | S    | <b>447.2310</b> | 224.1191        | 430.2045        | 215.6059         | 429.2205        | 215.1139         | 4 |
| 7 | 101.0709        | 783.3672        | 392.1872        | 766.3406 | 383.6740         | 765.3566       | 383.1819         | Q    | <b>360.1990</b> | 180.6031        | 343.1724        | 172.0899         |                 |                  | 3 |
| 8 | 30.0338         | 840.3886        | 420.6980        | 823.3621 | 412.1847         | 822.3781       | 411.6927         | G    | 232.1404        | 116.5738        | 215.1139        | 108.0606         |                 |                  | 2 |
| 9 | 129.1135        |                 |                 |          |                  |                |                  | R    | <b>175.1190</b> | 88.0631         | 158.0924        | 79.5498          |                 |                  | 1 |

MS/MS Fragmentation of **GPVSVGVDAR**

Found in **P25774**, P25774|CATS\_HUMAN Cathepsin S OS=Homo sapiens GN=CTSS PE=1 SV=3

Match to Query 280: 955.497060 from(478.755806,2+)

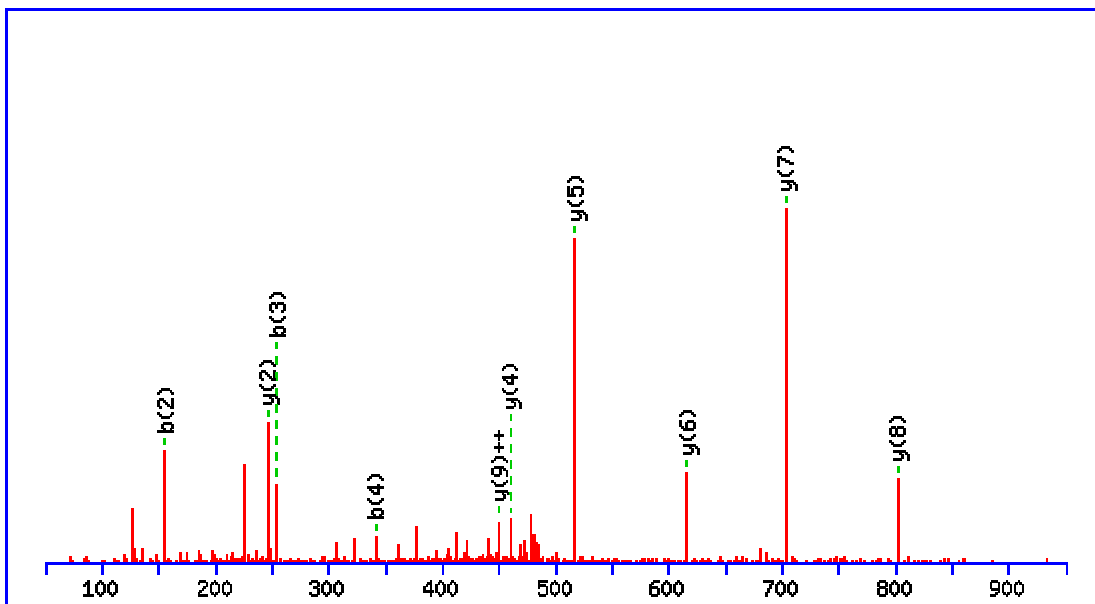

Monoisotopic mass of neutral peptide  $M_r(\text{calc})$ : 955.5087

Fixed modifications: Carbamidomethyl (C)

Ions Score: 58 Expect: 0.0001

Matches (**Bold Red**): 10/90 fragment ions using 17 most intense peaks

| #         | Immon.   | b               | b <sup>++</sup> | b <sup>0</sup> | b <sup>0++</sup> | Seq.     | y               | y <sup>++</sup> | y <sup>*</sup> | y <sup>*++</sup> | y <sup>0</sup> | y <sup>0++</sup> | #         |
|-----------|----------|-----------------|-----------------|----------------|------------------|----------|-----------------|-----------------|----------------|------------------|----------------|------------------|-----------|
| <b>1</b>  | 30.0338  | 58.0287         | 29.5180         |                |                  | <b>G</b> |                 |                 |                |                  |                |                  | <b>10</b> |
| <b>2</b>  | 70.0651  | <b>155.0815</b> | 78.0444         |                |                  | <b>P</b> | 899.4945        | <b>450.2509</b> | 882.4680       | 441.7376         | 881.4839       | 441.2456         | <b>9</b>  |
| <b>3</b>  | 72.0808  | <b>254.1499</b> | 127.5786        |                |                  | <b>V</b> | <b>802.4417</b> | 401.7245        | 785.4152       | 393.2112         | 784.4312       | 392.7192         | <b>8</b>  |
| <b>4</b>  | 60.0444  | <b>341.1819</b> | 171.0946        | 323.1714       | 162.0893         | <b>S</b> | <b>703.3733</b> | 352.1903        | 686.3468       | 343.6770         | 685.3628       | 343.1850         | <b>7</b>  |
| <b>5</b>  | 72.0808  | 440.2504        | 220.6288        | 422.2398       | 211.6235         | <b>V</b> | <b>616.3413</b> | 308.6743        | 599.3148       | 300.1610         | 598.3307       | 299.6690         | <b>6</b>  |
| <b>6</b>  | 30.0338  | 497.2718        | 249.1395        | 479.2613       | 240.1343         | <b>G</b> | <b>517.2729</b> | 259.1401        | 500.2463       | 250.6268         | 499.2623       | 250.1348         | <b>5</b>  |
| <b>7</b>  | 72.0808  | 596.3402        | 298.6738        | 578.3297       | 289.6685         | <b>V</b> | <b>460.2514</b> | 230.6293        | 443.2249       | 222.1161         | 442.2409       | 221.6241         | <b>4</b>  |
| <b>8</b>  | 88.0393  | 711.3672        | 356.1872        | 693.3566       | 347.1819         | <b>D</b> | 361.1830        | 181.0951        | 344.1565       | 172.5819         | 343.1724       | 172.0899         | <b>3</b>  |
| <b>9</b>  | 44.0495  | 782.4043        | 391.7058        | 764.3937       | 382.7005         | <b>A</b> | <b>246.1561</b> | 123.5817        | 229.1295       | 115.0684         |                |                  | <b>2</b>  |
| <b>10</b> | 129.1135 |                 |                 |                |                  | <b>R</b> | 175.1190        | 88.0631         | 158.0924       | 79.5498          |                |                  | <b>1</b>  |

MS/MS Fragmentation of **GIDSDASYPYK**

Found in **P25774**, P25774|CATS\_HUMAN Cathepsin S OS=Homo sapiens GN=CTSS PE=1 SV=3

Match to Query 152: 1214.490102 from(608.252327,2+)

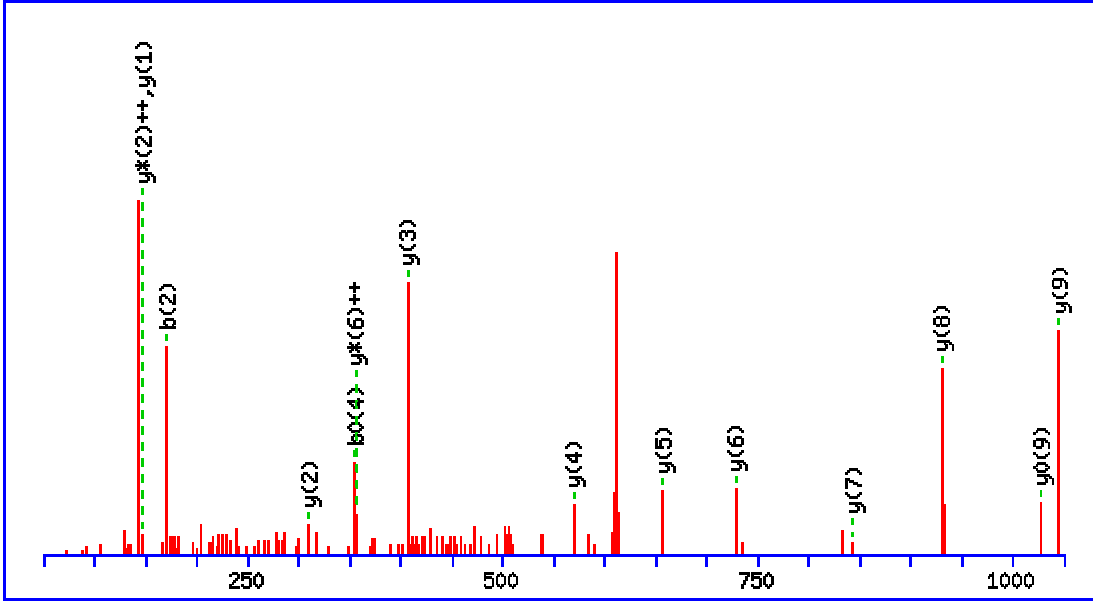

Monoisotopic mass of neutral peptide  $M_r(\text{calc})$ : 1214.5455

Fixed modifications: Carbamidomethyl (C)

Ions Score: 54 Expect: 0.00032

Matches (**Bold Red**): 14/99 fragment ions using 33 most intense peaks

| #  | Immon.   | b               | b <sup>++</sup> | b <sup>0</sup>  | b <sup>0++</sup> | Seq. | y                | y <sup>++</sup> | y <sup>*</sup> | y <sup>*++</sup> | y <sup>0</sup>   | y <sup>0++</sup> | #  |
|----|----------|-----------------|-----------------|-----------------|------------------|------|------------------|-----------------|----------------|------------------|------------------|------------------|----|
| 1  | 30.0338  | 58.0287         | 29.5180         |                 |                  | G    |                  |                 |                |                  |                  |                  | 11 |
| 2  | 86.0964  | <b>171.1128</b> | 86.0600         |                 |                  | I    | 1158.5313        | 579.7693        | 1141.5048      | 571.2560         | 1140.5208        | 570.7640         | 10 |
| 3  | 88.0393  | 286.1397        | 143.5735        | 268.1292        | 134.5682         | D    | <b>1045.4473</b> | 523.2273        | 1028.4207      | 514.7140         | <b>1027.4367</b> | 514.2220         | 9  |
| 4  | 60.0444  | 373.1718        | 187.0895        | <b>355.1612</b> | 178.0842         | S    | <b>930.4203</b>  | 465.7138        | 913.3938       | 457.2005         | 912.4098         | 456.7085         | 8  |
| 5  | 88.0393  | 488.1987        | 244.6030        | 470.1882        | 235.5977         | D    | <b>843.3883</b>  | 422.1978        | 826.3618       | 413.6845         | 825.3777         | 413.1925         | 7  |
| 6  | 44.0495  | 559.2358        | 280.1216        | 541.2253        | 271.1163         | A    | <b>728.3614</b>  | 364.6843        | 711.3348       | <b>356.1710</b>  | 710.3508         | 355.6790         | 6  |
| 7  | 60.0444  | 646.2679        | 323.6376        | 628.2573        | 314.6323         | S    | <b>657.3243</b>  | 329.1658        | 640.2977       | 320.6525         | 639.3137         | 320.1605         | 5  |
| 8  | 136.0757 | 809.3312        | 405.1692        | 791.3206        | 396.1640         | Y    | <b>570.2922</b>  | 285.6498        | 553.2657       | 277.1365         |                  |                  | 4  |
| 9  | 70.0651  | 906.3840        | 453.6956        | 888.3734        | 444.6903         | P    | <b>407.2289</b>  | 204.1181        | 390.2023       | 195.6048         |                  |                  | 3  |
| 10 | 136.0757 | 1069.4473       | 535.2273        | 1051.4367       | 526.2220         | Y    | <b>310.1761</b>  | 155.5917        | 293.1496       | <b>147.0784</b>  |                  |                  | 2  |
| 11 | 101.1073 |                 |                 |                 |                  | K    | <b>147.1128</b>  | 74.0600         | 130.0863       | 65.5468          |                  |                  | 1  |

MS/MS Fragmentation of **VFNETPINPR**

Found in **Q9Y678**, Q9Y678|COPG\_HUMAN Coatomer subunit gamma OS=Homo sapiens GN=COPG PE=1 SV=1

Match to Query 536: 1185.573906 from(593.794229,2+)

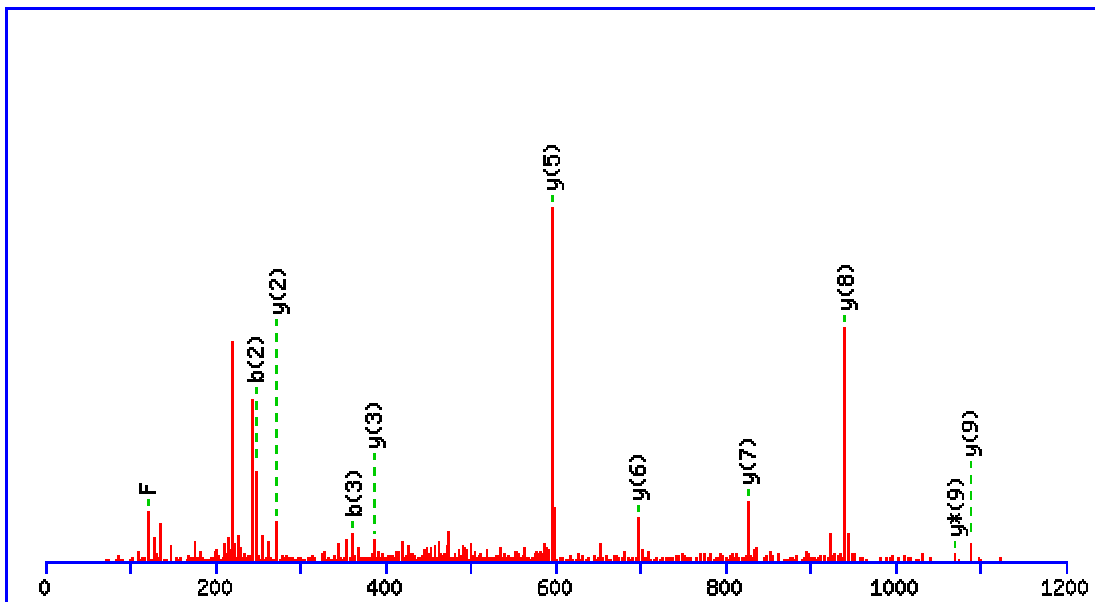

Monoisotopic mass of neutral peptide Mr(calc): 1185.6142

Fixed modifications: Carbamidomethyl (C)

Ions Score: 63 Expect: 3.8e-005

Matches (Bold Red): 11/98 fragment ions using 18 most intense peaks

| #  | Immon.          | b               | b <sup>++</sup> | b*       | b <sup>*++</sup> | b <sup>0</sup> | b <sup>0++</sup> | Seq. | y                | y <sup>++</sup> | y*               | y <sup>*++</sup> | y <sup>0</sup> | y <sup>0++</sup> | #  |
|----|-----------------|-----------------|-----------------|----------|------------------|----------------|------------------|------|------------------|-----------------|------------------|------------------|----------------|------------------|----|
| 1  | 72.0808         | 100.0757        | 50.5415         |          |                  |                |                  | V    |                  |                 |                  |                  |                |                  | 10 |
| 2  | <b>120.0808</b> | <b>247.1441</b> | 124.0757        |          |                  |                |                  | F    | <b>1087.5531</b> | 544.2802        | <b>1070.5265</b> | 535.7669         | 1069.5425      | 535.2749         | 9  |
| 3  | 87.0553         | <b>361.1870</b> | 181.0972        | 344.1605 | 172.5839         |                |                  | N    | <b>940.4847</b>  | 470.7460        | 923.4581         | 462.2327         | 922.4741       | 461.7407         | 8  |
| 4  | 102.0550        | 490.2296        | 245.6185        | 473.2031 | 237.1052         | 472.2191       | 236.6132         | E    | <b>826.4417</b>  | 413.7245        | 809.4152         | 405.2112         | 808.4312       | 404.7192         | 7  |
| 5  | 74.0600         | 591.2773        | 296.1423        | 574.2508 | 287.6290         | 573.2667       | 287.1370         | T    | <b>697.3992</b>  | 349.2032        | 680.3726         | 340.6899         | 679.3886       | 340.1979         | 6  |
| 6  | 70.0651         | 688.3301        | 344.6687        | 671.3035 | 336.1554         | 670.3195       | 335.6634         | P    | <b>596.3515</b>  | 298.6794        | 579.3249         | 290.1661         |                |                  | 5  |
| 7  | 86.0964         | 801.4141        | 401.2107        | 784.3876 | 392.6974         | 783.4036       | 392.2054         | I    | 499.2987         | 250.1530        | 482.2722         | 241.6397         |                |                  | 4  |
| 8  | 87.0553         | 915.4571        | 458.2322        | 898.4305 | 449.7189         | 897.4465       | 449.2269         | N    | <b>386.2146</b>  | 193.6110        | 369.1881         | 185.0977         |                |                  | 3  |
| 9  | 70.0651         | 1012.5098       | 506.7585        | 995.4833 | 498.2453         | 994.4993       | 497.7533         | P    | <b>272.1717</b>  | 136.5895        | 255.1452         | 128.0762         |                |                  | 2  |
| 10 | 129.1135        |                 |                 |          |                  |                |                  | R    | 175.1190         | 88.0631         | 158.0924         | 79.5498          |                |                  | 1  |

MS/MS Fragmentation of **ASGVAVSDGVK**

Found in **P23528**, P23528|COF1\_HUMAN Cofilin-1 OS=Homo sapiens GN=CFL1 PE=1 SV=3

Match to Query 156: 1143.510576 from(572.762564,2+)

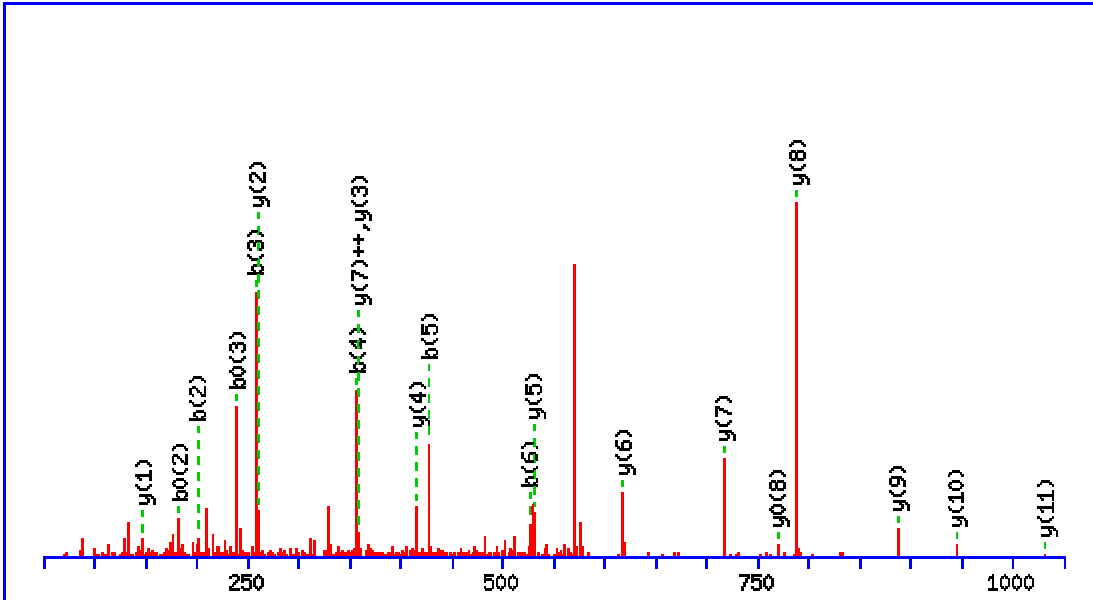

**Monoisotopic mass of neutral peptide Mr(calc):** 1143.6136

**Fixed modifications:** Carbamidomethyl (C)

**Variable modifications:**

**N-term :** Acetyl (Protein N-term)

**Ions Score:** 88 **Expect:** 1.4e-007

**Matches (Bold Red):** 20/112 fragment ions using 44 most intense peaks

| #  | Immon.   | b               | b <sup>++</sup> | b <sup>0</sup>  | b <sup>0++</sup> | Seq. | y                | y <sup>++</sup> | y <sup>*</sup> | y <sup>*++</sup> | y <sup>0</sup>  | y <sup>0++</sup> | #  |
|----|----------|-----------------|-----------------|-----------------|------------------|------|------------------|-----------------|----------------|------------------|-----------------|------------------|----|
| 1  | 44.0495  | 114.0549        | 57.5311         |                 |                  | A    |                  |                 |                |                  |                 |                  | 12 |
| 2  | 60.0444  | <b>201.0870</b> | 101.0471        | <b>183.0764</b> | 92.0418          | S    | <b>1031.5732</b> | 516.2902        | 1014.5466      | 507.7769         | 1013.5626       | 507.2849         | 11 |
| 3  | 30.0338  | <b>258.1084</b> | 129.5579        | <b>240.0979</b> | 120.5526         | G    | <b>944.5411</b>  | 472.7742        | 927.5146       | 464.2609         | 926.5306        | 463.7689         | 10 |
| 4  | 72.0808  | <b>357.1769</b> | 179.0921        | 339.1663        | 170.0868         | V    | <b>887.5197</b>  | 444.2635        | 870.4931       | 435.7502         | 869.5091        | 435.2582         | 9  |
| 5  | 44.0495  | <b>428.2140</b> | 214.6106        | 410.2034        | 205.6053         | A    | <b>788.4512</b>  | 394.7293        | 771.4247       | 386.2160         | <b>770.4407</b> | 385.7240         | 8  |
| 6  | 72.0808  | <b>527.2824</b> | 264.1448        | 509.2718        | 255.1395         | V    | <b>717.4141</b>  | <b>359.2107</b> | 700.3876       | 350.6974         | 699.4036        | 350.2054         | 7  |
| 7  | 60.0444  | 614.3144        | 307.6608        | 596.3038        | 298.6556         | S    | <b>618.3457</b>  | 309.6765        | 601.3192       | 301.1632         | 600.3352        | 300.6712         | 6  |
| 8  | 88.0393  | 729.3414        | 365.1743        | 711.3308        | 356.1690         | D    | <b>531.3137</b>  | 266.1605        | 514.2871       | 257.6472         | 513.3031        | 257.1552         | 5  |
| 9  | 30.0338  | 786.3628        | 393.6850        | 768.3523        | 384.6798         | G    | <b>416.2867</b>  | 208.6470        | 399.2602       | 200.1337         |                 |                  | 4  |
| 10 | 72.0808  | 885.4312        | 443.2193        | 867.4207        | 434.2140         | V    | <b>359.2653</b>  | 180.1363        | 342.2387       | 171.6230         |                 |                  | 3  |
| 11 | 86.0964  | 998.5153        | 499.7613        | 980.5047        | 490.7560         | I    | <b>260.1969</b>  | 130.6021        | 243.1703       | 122.0888         |                 |                  | 2  |
| 12 | 101.1073 |                 |                 |                 |                  | K    | <b>147.1128</b>  | 74.0600         | 130.0863       | 65.5468          |                 |                  | 1  |

MS/MS Fragmentation of **AAANEQLTR**

Found in **Q9NX63**, Q9NX63|CHCH3\_HUMAN Coiled-coil-helix-coiled-coil-helix domain-containing protein 3, mitochondrial OS=Homo sapiens GN=CHCHD3 PE=1 SV=1

Match to Query 266: 972.547446 from(487.280999,2+)

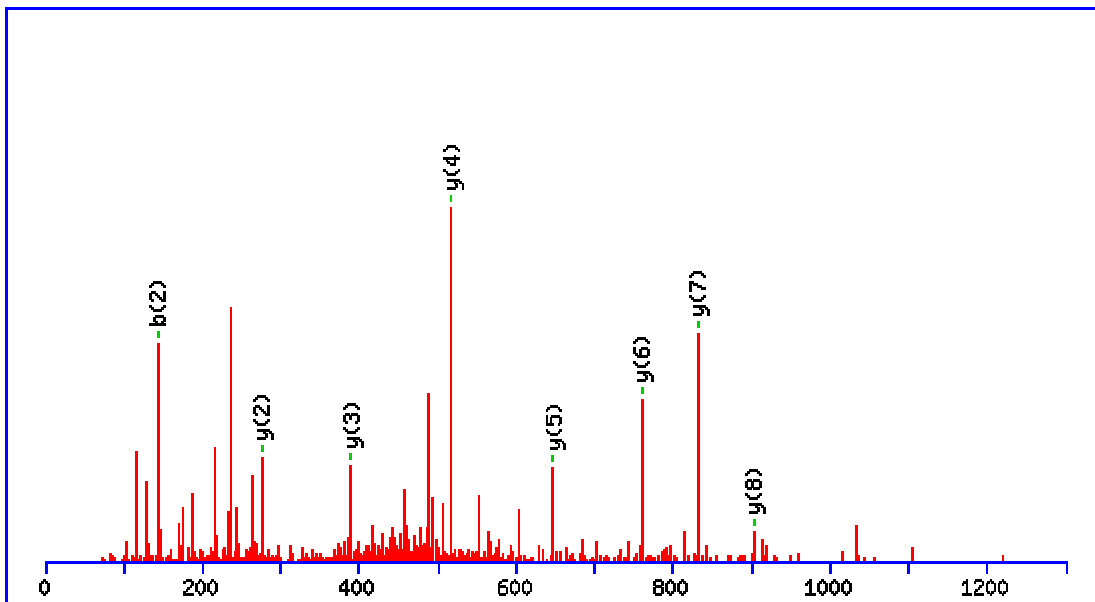

Monoisotopic mass of neutral peptide Mr(calc): 972.4988

Fixed modifications: Carbamidomethyl (C)

Ions Score: 67 Expect: 1.7e-005

Matches (Bold Red): 8/89 fragment ions using 11 most intense peaks

| # | Immon.   | b               | b <sup>++</sup> | b <sup>*</sup> | b <sup>*++</sup> | b <sup>0</sup> | b <sup>0++</sup> | Seq. | y               | y <sup>++</sup> | y <sup>*</sup> | y <sup>*++</sup> | y <sup>0</sup> | y <sup>0++</sup> | # |
|---|----------|-----------------|-----------------|----------------|------------------|----------------|------------------|------|-----------------|-----------------|----------------|------------------|----------------|------------------|---|
| 1 | 44.0495  | 72.0444         | 36.5258         |                |                  |                |                  | A    |                 |                 |                |                  |                |                  | 9 |
| 2 | 44.0495  | <b>143.0815</b> | 72.0444         |                |                  |                |                  | A    | <b>902.4690</b> | 451.7381        | 885.4425       | 443.2249         | 884.4585       | 442.7329         | 8 |
| 3 | 44.0495  | 214.1186        | 107.5629        |                |                  |                |                  | A    | <b>831.4319</b> | 416.2196        | 814.4054       | 407.7063         | 813.4213       | 407.2143         | 7 |
| 4 | 87.0553  | 328.1615        | 164.5844        | 311.1350       | 156.0711         |                |                  | N    | <b>760.3948</b> | 380.7010        | 743.3682       | 372.1878         | 742.3842       | 371.6958         | 6 |
| 5 | 102.0550 | 457.2041        | 229.1057        | 440.1776       | 220.5924         | 439.1936       | 220.1004         | E    | <b>646.3519</b> | 323.6796        | 629.3253       | 315.1663         | 628.3413       | 314.6743         | 5 |
| 6 | 101.0709 | 585.2627        | 293.1350        | 568.2362       | 284.6217         | 567.2522       | 284.1297         | Q    | <b>517.3093</b> | 259.1583        | 500.2827       | 250.6450         | 499.2987       | 250.1530         | 4 |
| 7 | 86.0964  | 698.3468        | 349.6770        | 681.3202       | 341.1638         | 680.3362       | 340.6717         | L    | <b>389.2507</b> | 195.1290        | 372.2241       | 186.6157         | 371.2401       | 186.1237         | 3 |
| 8 | 74.0600  | 799.3945        | 400.2009        | 782.3679       | 391.6876         | 781.3839       | 391.1956         | T    | <b>276.1666</b> | 138.5870        | 259.1401       | 130.0737         | 258.1561       | 129.5817         | 2 |
| 9 | 129.1135 |                 |                 |                |                  |                |                  | R    | 175.1190        | 88.0631         | 158.0924       | 79.5498          |                |                  | 1 |



MS/MS Fragmentation of **LSENVDR**

Found in **Q9NX63**, Q9NX63|CHCH3\_HUMAN Coiled-coil-helix-coiled-coil-helix domain-containing protein 3, mitochondrial OS=Homo sapiens GN=CHCHD3 PE=1 SV=1

Match to Query 230: 944.470694 from(473.242623,2+)

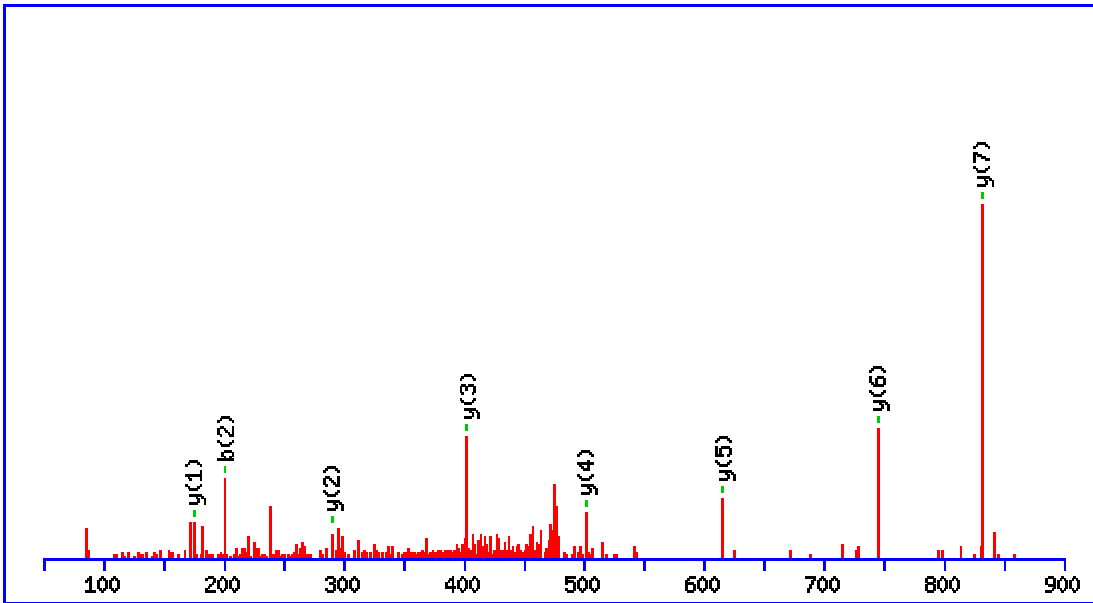

**Monoisotopic mass of neutral peptide Mr(calc):** 944.4927

**Fixed modifications:** Carbamidomethyl (C)

**Ions Score:** 48 **Expect:** 0.0014

**Matches (Bold Red):** 8/82 fragment ions using 17 most intense peaks

| # | Immon.   | b               | b <sup>++</sup> | b <sup>*</sup> | b <sup>*++</sup> | b <sup>0</sup> | b <sup>0++</sup> | Seq. | y               | y <sup>++</sup> | y <sup>*</sup> | y <sup>*++</sup> | y <sup>0</sup> | y <sup>0++</sup> | # |
|---|----------|-----------------|-----------------|----------------|------------------|----------------|------------------|------|-----------------|-----------------|----------------|------------------|----------------|------------------|---|
| 1 | 86.0964  | 114.0913        | 57.5493         |                |                  |                |                  | L    |                 |                 |                |                  |                |                  | 8 |
| 2 | 60.0444  | <b>201.1234</b> | 101.0653        |                |                  | 183.1128       | 92.0600          | S    | <b>832.4159</b> | 416.7116        | 815.3894       | 408.1983         | 814.4054       | 407.7063         | 7 |
| 3 | 102.0550 | 330.1660        | 165.5866        |                |                  | 312.1554       | 156.5813         | E    | <b>745.3839</b> | 373.1956        | 728.3573       | 364.6823         | 727.3733       | 364.1903         | 6 |
| 4 | 87.0553  | 444.2089        | 222.6081        | 427.1823       | 214.0948         | 426.1983       | 213.6028         | N    | <b>616.3413</b> | 308.6743        | 599.3148       | 300.1610         | 598.3307       | 299.6690         | 5 |
| 5 | 72.0808  | 543.2773        | 272.1423        | 526.2508       | 263.6290         | 525.2667       | 263.1370         | V    | <b>502.2984</b> | 251.6528        | 485.2718       | 243.1396         | 484.2878       | 242.6475         | 4 |
| 6 | 86.0964  | 656.3614        | 328.6843        | 639.3348       | 320.1710         | 638.3508       | 319.6790         | I    | <b>403.2300</b> | 202.1186        | 386.2034       | 193.6053         | 385.2194       | 193.1133         | 3 |
| 7 | 88.0393  | 771.3883        | 386.1978        | 754.3618       | 377.6845         | 753.3777       | 377.1925         | D    | <b>290.1459</b> | 145.5766        | 273.1193       | 137.0633         | 272.1353       | 136.5713         | 2 |
| 8 | 129.1135 |                 |                 |                |                  |                |                  | R    | <b>175.1190</b> | 88.0631         | 158.0924       | 79.5498          |                |                  | 1 |

MS/MS Fragmentation of **TIAQG NLSNTDVQAAK**

Found in **P22695**, P22695|QCR2\_HUMAN Cytochrome b-c1 complex subunit 2, mitochondrial OS=Homo sapiens GN=UQCRC2 PE=1 SV=3

Match to Query 703: 1629.766122 from(815.890337,2+)

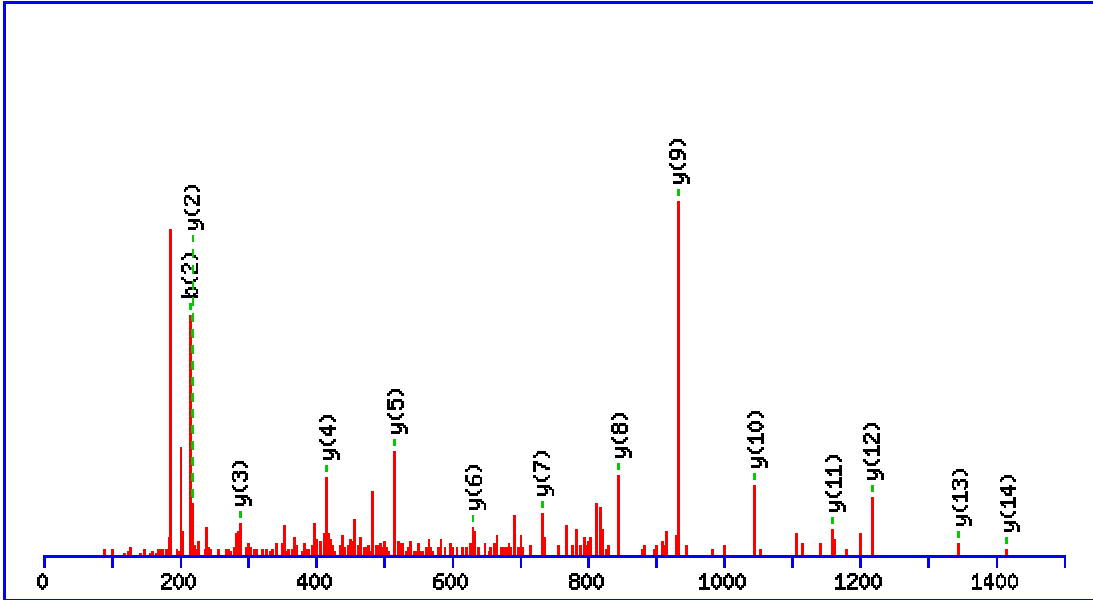

Monoisotopic mass of neutral peptide  $M_r(\text{calc})$ : 1629.8322

Fixed modifications: Carbamidomethyl (C)

Ions Score: 122 Expect: 4.3e-011

Matches (**Bold Red**): 14/180 fragment ions using 18 most intense peaks

| #  | Immon.   | b               | b <sup>++</sup> | b*        | b <sup>***</sup> | b <sup>0</sup> | b <sup>0++</sup> | Seq. | y                | y <sup>++</sup> | y*        | y <sup>***</sup> | y <sup>0</sup> | y <sup>0++</sup> | #  |
|----|----------|-----------------|-----------------|-----------|------------------|----------------|------------------|------|------------------|-----------------|-----------|------------------|----------------|------------------|----|
| 1  | 74.0600  | 102.0550        | 51.5311         |           |                  | 84.0444        | 42.5258          | T    |                  |                 |           |                  |                |                  | 16 |
| 2  | 86.0964  | <b>215.1390</b> | 108.0731        |           |                  | 197.1285       | 99.0679          | I    | 1529.7918        | 765.3995        | 1512.7653 | 756.8863         | 1511.7812      | 756.3943         | 15 |
| 3  | 44.0495  | 286.1761        | 143.5917        |           |                  | 268.1656       | 134.5864         | A    | <b>1416.7077</b> | 708.8575        | 1399.6812 | 700.3442         | 1398.6972      | 699.8522         | 14 |
| 4  | 101.0709 | 414.2347        | 207.6210        | 397.2082  | 199.1077         | 396.2241       | 198.6157         | Q    | <b>1345.6706</b> | 673.3390        | 1328.6441 | 664.8257         | 1327.6601      | 664.3337         | 13 |
| 5  | 30.0338  | 471.2562        | 236.1317        | 454.2296  | 227.6185         | 453.2456       | 227.1264         | G    | <b>1217.6121</b> | 609.3097        | 1200.5855 | 600.7964         | 1199.6015      | 600.3044         | 12 |
| 6  | 87.0553  | 585.2991        | 293.1532        | 568.2726  | 284.6399         | 567.2885       | 284.1479         | N    | <b>1160.5906</b> | 580.7989        | 1143.5640 | 572.2857         | 1142.5800      | 571.7937         | 11 |
| 7  | 86.0964  | 698.3832        | 349.6952        | 681.3566  | 341.1819         | 680.3726       | 340.6899         | L    | <b>1046.5477</b> | 523.7775        | 1029.5211 | 515.2642         | 1028.5371      | 514.7722         | 10 |
| 8  | 60.0444  | 785.4152        | 393.2112        | 768.3886  | 384.6980         | 767.4046       | 384.2060         | S    | <b>933.4636</b>  | 467.2354        | 916.4371  | 458.7222         | 915.4530       | 458.2302         | 9  |
| 9  | 87.0553  | 899.4581        | 450.2327        | 882.4316  | 441.7194         | 881.4476       | 441.2274         | N    | <b>846.4316</b>  | 423.7194        | 829.4050  | 415.2061         | 828.4210       | 414.7141         | 8  |
| 10 | 74.0600  | 1000.5058       | 500.7565        | 983.4793  | 492.2433         | 982.4952       | 491.7513         | T    | <b>732.3886</b>  | 366.6980        | 715.3621  | 358.1847         | 714.3781       | 357.6927         | 7  |
| 11 | 88.0393  | 1115.5327       | 558.2700        | 1098.5062 | 549.7567         | 1097.5222      | 549.2647         | D    | <b>631.3410</b>  | 316.1741        | 614.3144  | 307.6608         | 613.3304       | 307.1688         | 6  |
| 12 | 72.0808  | 1214.6012       | 607.8042        | 1197.5746 | 599.2909         | 1196.5906      | 598.7989         | V    | <b>516.3140</b>  | 258.6607        | 499.2875  | 250.1474         |                |                  | 5  |
| 13 | 101.0709 | 1342.6597       | 671.8335        | 1325.6332 | 663.3202         | 1324.6492      | 662.8282         | Q    | <b>417.2456</b>  | 209.1264        | 400.2191  | 200.6132         |                |                  | 4  |
| 14 | 44.0495  | 1413.6968       | 707.3521        | 1396.6703 | 698.8388         | 1395.6863      | 698.3468         | A    | <b>289.1870</b>  | 145.0972        | 272.1605  | 136.5839         |                |                  | 3  |
| 15 | 44.0495  | 1484.7340       | 742.8706        | 1467.7074 | 734.3573         | 1466.7234      | 733.8653         | A    | <b>218.1499</b>  | 109.5786        | 201.1234  | 101.0653         |                |                  | 2  |
| 16 | 101.1073 |                 |                 |           |                  |                |                  | K    | 147.1128         | 74.0600         | 130.0863  | 65.5468          |                |                  | 1  |

MS/MS Fragmentation of **EGTGSTATSSSTAGAAGK**

Found in **O15372**, O15372|EIF3H\_HUMAN Eukaryotic translation initiation factor 3 subunit H OS=Homo sapiens GN=EIF3H PE=1 SV=1

Match to Query 745: 1626.730688 from(814.372620,2+)

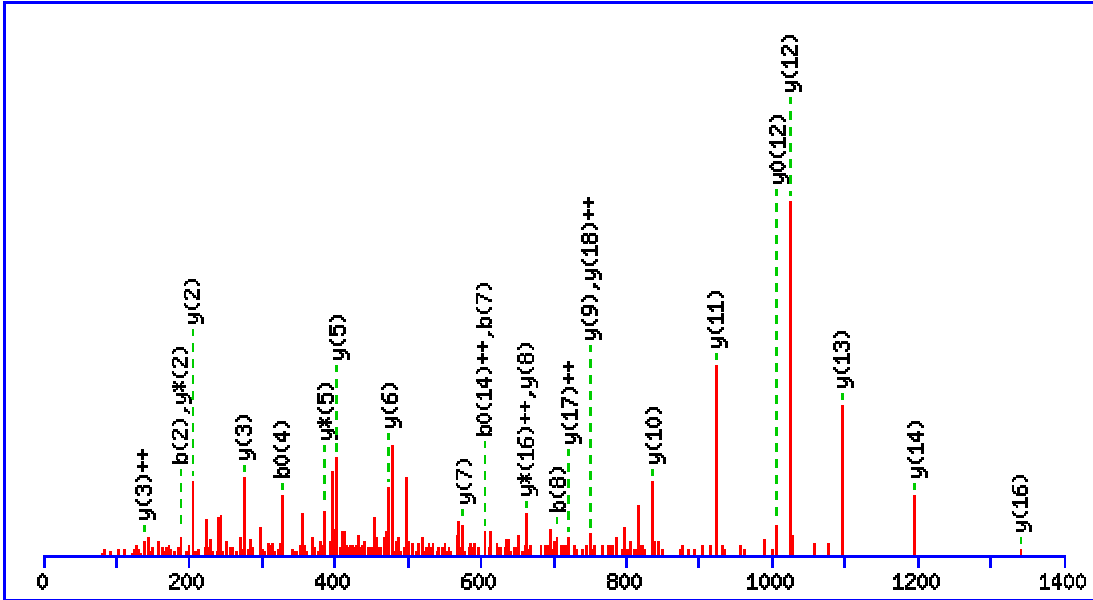

Monoisotopic mass of neutral peptide  $M_r(\text{calc})$ : 1626.7333

Fixed modifications: Carbamidomethyl (C)

Ions Score: 79 Expect: 8.7e-007

Matches (**Bold Red**): 25/187 fragment ions using 47 most intense peaks

| #  | Immon.   | b               | b <sup>++</sup> | b <sup>0</sup>  | b <sup>0++</sup> | Seq. | y                | y <sup>++</sup> | y <sup>*</sup>  | y <sup>*++</sup> | y <sup>0</sup>   | y <sup>0++</sup> | #  |
|----|----------|-----------------|-----------------|-----------------|------------------|------|------------------|-----------------|-----------------|------------------|------------------|------------------|----|
| 1  | 102.0550 | 130.0499        | 65.5286         | 112.0393        | 56.5233          | E    |                  |                 |                 |                  |                  |                  | 19 |
| 2  | 30.0338  | <b>187.0713</b> | 94.0393         | 169.0608        | 85.0340          | G    | 1498.6980        | <b>749.8526</b> | 1481.6714       | 741.3393         | 1480.6874        | 740.8473         | 18 |
| 3  | 74.0600  | 288.1190        | 144.5631        | 270.1084        | 135.5579         | T    | 1441.6765        | <b>721.3419</b> | 1424.6500       | 712.8286         | 1423.6659        | 712.3366         | 17 |
| 4  | 30.0338  | 345.1405        | 173.0739        | <b>327.1299</b> | 164.0686         | G    | <b>1340.6288</b> | 670.8181        | 1323.6023       | <b>662.3048</b>  | 1322.6183        | 661.8128         | 16 |
| 5  | 60.0444  | 432.1725        | 216.5899        | 414.1619        | 207.5846         | S    | 1283.6074        | 642.3073        | 1266.5808       | 633.7940         | 1265.5968        | 633.3020         | 15 |
| 6  | 74.0600  | 533.2202        | 267.1137        | 515.2096        | 258.1084         | T    | <b>1196.5753</b> | 598.7913        | 1179.5488       | 590.2780         | 1178.5648        | 589.7860         | 14 |
| 7  | 44.0495  | <b>604.2573</b> | 302.6323        | 586.2467        | 293.6270         | A    | <b>1095.5277</b> | 548.2675        | 1078.5011       | 539.7542         | 1077.5171        | 539.2622         | 13 |
| 8  | 74.0600  | <b>705.3050</b> | 353.1561        | 687.2944        | 344.1508         | T    | <b>1024.4905</b> | 512.7489        | 1007.4640       | 504.2356         | <b>1006.4800</b> | 503.7436         | 12 |
| 9  | 60.0444  | 792.3370        | 396.6721        | 774.3264        | 387.6669         | S    | <b>923.4429</b>  | 462.2251        | 906.4163        | 453.7118         | 905.4323         | 453.2198         | 11 |
| 10 | 60.0444  | 879.3690        | 440.1882        | 861.3585        | 431.1829         | S    | <b>836.4108</b>  | 418.7091        | 819.3843        | 410.1958         | 818.4003         | 409.7038         | 10 |
| 11 | 60.0444  | 966.4011        | 483.7042        | 948.3905        | 474.6989         | S    | <b>749.3788</b>  | 375.1930        | 732.3523        | 366.6798         | 731.3682         | 366.1878         | 9  |
| 12 | 60.0444  | 1053.4331       | 527.2202        | 1035.4225       | 518.2149         | S    | <b>662.3468</b>  | 331.6770        | 645.3202        | 323.1638         | 644.3362         | 322.6717         | 8  |
| 13 | 74.0600  | 1154.4808       | 577.7440        | 1136.4702       | 568.7387         | T    | <b>575.3148</b>  | 288.1610        | 558.2882        | 279.6477         | 557.3042         | 279.1557         | 7  |
| 14 | 44.0495  | 1225.5179       | 613.2626        | 1207.5073       | <b>604.2573</b>  | A    | <b>474.2671</b>  | 237.6372        | 457.2405        | 229.1239         |                  |                  | 6  |
| 15 | 30.0338  | 1282.5393       | 641.7733        | 1264.5288       | 632.7680         | G    | <b>403.2300</b>  | 202.1186        | <b>386.2034</b> | 193.6053         |                  |                  | 5  |
| 16 | 44.0495  | 1353.5765       | 677.2919        | 1335.5659       | 668.2866         | A    | 346.2085         | 173.6079        | 329.1819        | 165.0946         |                  |                  | 4  |
| 17 | 44.0495  | 1424.6136       | 712.8104        | 1406.6030       | 703.8051         | A    | <b>275.1714</b>  | <b>138.0893</b> | 258.1448        | 129.5761         |                  |                  | 3  |
| 18 | 30.0338  | 1481.6350       | 741.3212        | 1463.6245       | 732.3159         | G    | <b>204.1343</b>  | 102.5708        | <b>187.1077</b> | 94.0575          |                  |                  | 2  |
| 19 | 101.1073 |                 |                 |                 |                  | K    | 147.1128         | 74.0600         | 130.0863        | 65.5468          |                  |                  | 1  |

MS/MS Fragmentation of **ALLAGGPDEADR**

Found in **Q9H3U5**, Q9H3U5|MFSD1\_HUMAN Major facilitator superfamily domain-containing protein 1  
 OS=Homo sapiens GN=MFSD1 PE=2 SV=2

Match to Query 285: 1183.567142 from(592.790847,2+)

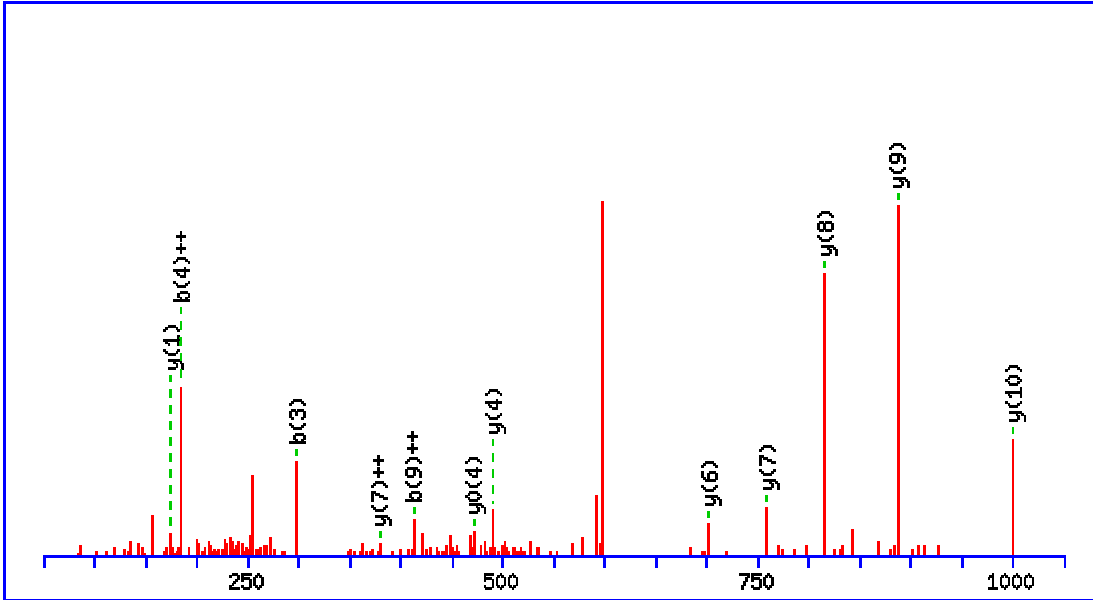

Monoisotopic mass of neutral peptide **Mr(calc): 1183.5833**

Fixed modifications: Carbamidomethyl (C)

Ions Score: 48 Expect: 0.0011

Matches (**Bold Red**): 13/106 fragment ions using 19 most intense peaks

| #  | Immon.   | b               | b <sup>++</sup> | b <sup>0</sup> | b <sup>0++</sup> | Seq. | y                | y <sup>++</sup> | y <sup>*</sup> | y <sup>***</sup> | y <sup>0</sup>  | y <sup>0++</sup> | #  |
|----|----------|-----------------|-----------------|----------------|------------------|------|------------------|-----------------|----------------|------------------|-----------------|------------------|----|
| 1  | 44.0495  | 72.0444         | 36.5258         |                |                  | A    |                  |                 |                |                  |                 |                  | 12 |
| 2  | 86.0964  | <b>185.1285</b> | 93.0679         |                |                  | L    | 1113.5535        | 557.2804        | 1096.5269      | 548.7671         | 1095.5429       | 548.2751         | 11 |
| 3  | 86.0964  | <b>298.2125</b> | 149.6099        |                |                  | L    | <b>1000.4694</b> | 500.7383        | 983.4429       | 492.2251         | 982.4588        | 491.7331         | 10 |
| 4  | 44.0495  | 369.2496        | <b>185.1285</b> |                |                  | A    | <b>887.3854</b>  | 444.1963        | 870.3588       | 435.6830         | 869.3748        | 435.1910         | 9  |
| 5  | 30.0338  | 426.2711        | 213.6392        |                |                  | G    | <b>816.3482</b>  | 408.6778        | 799.3217       | 400.1645         | 798.3377        | 399.6725         | 8  |
| 6  | 30.0338  | 483.2926        | 242.1499        |                |                  | G    | <b>759.3268</b>  | <b>380.1670</b> | 742.3002       | 371.6538         | 741.3162        | 371.1617         | 7  |
| 7  | 70.0651  | 580.3453        | 290.6763        |                |                  | P    | <b>702.3053</b>  | 351.6563        | 685.2788       | 343.1430         | 684.2947        | 342.6510         | 6  |
| 8  | 88.0393  | 695.3723        | 348.1898        | 677.3617       | 339.1845         | D    | 605.2525         | 303.1299        | 588.2260       | 294.6166         | 587.2420        | 294.1246         | 5  |
| 9  | 102.0550 | 824.4149        | <b>412.7111</b> | 806.4043       | 403.7058         | E    | <b>490.2256</b>  | 245.6164        | 473.1991       | 237.1032         | <b>472.2150</b> | 236.6112         | 4  |
| 10 | 44.0495  | 895.4520        | 448.2296        | 877.4414       | 439.2243         | A    | 361.1830         | 181.0951        | 344.1565       | 172.5819         | 343.1724        | 172.0899         | 3  |
| 11 | 88.0393  | 1010.4789       | 505.7431        | 992.4684       | 496.7378         | D    | 290.1459         | 145.5766        | 273.1193       | 137.0633         | 272.1353        | 136.5713         | 2  |
| 12 | 129.1135 |                 |                 |                |                  | R    | <b>175.1190</b>  | 88.0631         | 158.0924       | 79.5498          |                 |                  | 1  |

MS/MS Fragmentation of **GGAVVDEGPTGVK**

Found in **O15427**, O15427|MOT4\_HUMAN Monocarboxylate transporter 4 OS=Homo sapiens GN=SLC16A3 PE=1 SV=1

Match to Query 336: 1184.650720 from(593.332636,2+)

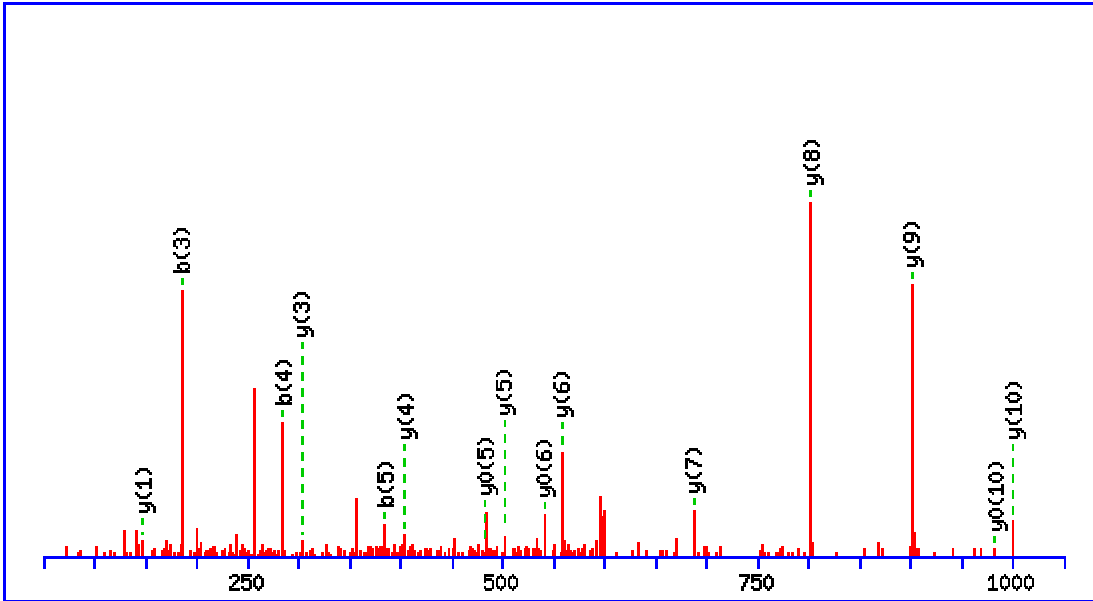

Monoisotopic mass of neutral peptide  $M_r(\text{calc})$ : 1184.6037

Fixed modifications: Carbamidomethyl (C)

Ions Score: 50 Expect: 0.00074

Matches (**Bold Red**): 15/117 fragment ions using 39 most intense peaks

| #  | Immon.   | b               | b <sup>++</sup> | b <sup>0</sup> | b <sup>0++</sup> | Seq. | y                | y <sup>++</sup> | y <sup>*</sup> | y <sup>*++</sup> | y <sup>0</sup>  | y <sup>0++</sup> | #  |
|----|----------|-----------------|-----------------|----------------|------------------|------|------------------|-----------------|----------------|------------------|-----------------|------------------|----|
| 1  | 30.0338  | 58.0287         | 29.5180         |                |                  | G    |                  |                 |                |                  |                 |                  | 13 |
| 2  | 30.0338  | 115.0502        | 58.0287         |                |                  | G    | 1128.5895        | 564.7984        | 1111.5630      | 556.2851         | 1110.5790       | 555.7931         | 12 |
| 3  | 44.0495  | <b>186.0873</b> | 93.5473         |                |                  | A    | 1071.5681        | 536.2877        | 1054.5415      | 527.7744         | 1053.5575       | 527.2824         | 11 |
| 4  | 72.0808  | <b>285.1557</b> | 143.0815        |                |                  | V    | <b>1000.5310</b> | 500.7691        | 983.5044       | 492.2558         | <b>982.5204</b> | 491.7638         | 10 |
| 5  | 72.0808  | <b>384.2241</b> | 192.6157        |                |                  | V    | <b>901.4625</b>  | 451.2349        | 884.4360       | 442.7216         | 883.4520        | 442.2296         | 9  |
| 6  | 88.0393  | 499.2511        | 250.1292        | 481.2405       | 241.1239         | D    | <b>802.3941</b>  | 401.7007        | 785.3676       | 393.1874         | 784.3836        | 392.6954         | 8  |
| 7  | 102.0550 | 628.2937        | 314.6505        | 610.2831       | 305.6452         | E    | <b>687.3672</b>  | 344.1872        | 670.3406       | 335.6740         | 669.3566        | 335.1819         | 7  |
| 8  | 30.0338  | 685.3151        | 343.1612        | 667.3046       | 334.1559         | G    | <b>558.3246</b>  | 279.6659        | 541.2980       | 271.1527         | <b>540.3140</b> | 270.6607         | 6  |
| 9  | 70.0651  | 782.3679        | 391.6876        | 764.3573       | 382.6823         | P    | <b>501.3031</b>  | 251.1552        | 484.2766       | 242.6419         | <b>483.2926</b> | 242.1499         | 5  |
| 10 | 74.0600  | 883.4156        | 442.2114        | 865.4050       | 433.2062         | T    | <b>404.2504</b>  | 202.6288        | 387.2238       | 194.1155         | 386.2398        | 193.6235         | 4  |
| 11 | 30.0338  | 940.4371        | 470.7222        | 922.4265       | 461.7169         | G    | <b>303.2027</b>  | 152.1050        | 286.1761       | 143.5917         |                 |                  | 3  |
| 12 | 72.0808  | 1039.5055       | 520.2564        | 1021.4949      | 511.2511         | V    | 246.1812         | 123.5942        | 229.1547       | 115.0810         |                 |                  | 2  |
| 13 | 101.1073 |                 |                 |                |                  | K    | <b>147.1128</b>  | 74.0600         | 130.0863       | 65.5468          |                 |                  | 1  |

MS/MS Fragmentation of **YTEQITNEK**

Found in **Q16718**, Q16718|NDUA5\_HUMAN NADH dehydrogenase [ubiquinone] 1 alpha subcomplex subunit 5 OS=Homo sapiens GN=NDUFA5 PE=1 SV=3

Match to Query 146: 1124.418462 from(563.216507,2+)

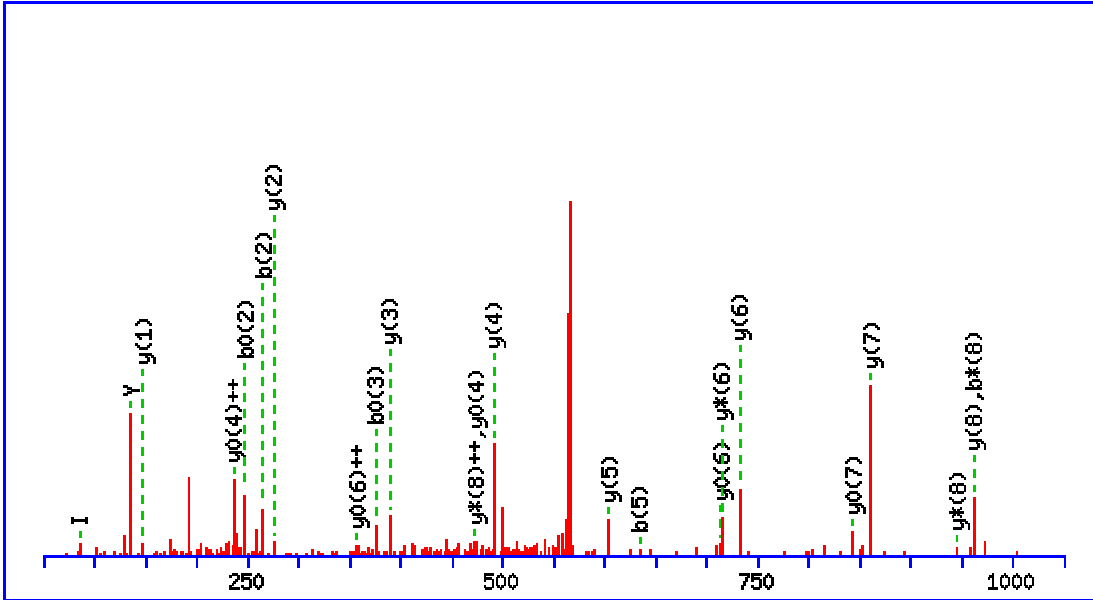

Monoisotopic mass of neutral peptide  $M_r(\text{calc})$ : 1124.5349

Fixed modifications: Carbamidomethyl (C)

Ions Score: 54 Expect: 0.00025

Matches (**Bold Red**): 23/95 fragment ions using 43 most intense peaks

| # | Immon.          | b               | b <sup>++</sup> | b <sup>*</sup>  | b <sup>*++</sup> | b <sup>0</sup>  | b <sup>0++</sup> | Seq. | y               | y <sup>++</sup> | y <sup>*</sup>  | y <sup>*++</sup> | y <sup>0</sup>  | y <sup>0++</sup> | # |
|---|-----------------|-----------------|-----------------|-----------------|------------------|-----------------|------------------|------|-----------------|-----------------|-----------------|------------------|-----------------|------------------|---|
| 1 | <b>136.0757</b> | 164.0706        | 82.5389         |                 |                  |                 |                  | Y    |                 |                 |                 |                  |                 |                  | 9 |
| 2 | 74.0600         | <b>265.1183</b> | 133.0628        |                 |                  | <b>247.1077</b> | 124.0575         | T    | <b>962.4789</b> | 481.7431        | <b>945.4524</b> | <b>473.2298</b>  | 944.4684        | 472.7378         | 8 |
| 3 | 102.0550        | 394.1609        | 197.5841        |                 |                  | <b>376.1503</b> | 188.5788         | E    | <b>861.4312</b> | 431.2193        | 844.4047        | 422.7060         | <b>843.4207</b> | 422.2140         | 7 |
| 4 | 101.0709        | 522.2195        | 261.6134        | 505.1929        | 253.1001         | 504.2089        | 252.6081         | Q    | <b>732.3886</b> | 366.6980        | <b>715.3621</b> | 358.1847         | <b>714.3781</b> | <b>357.6927</b>  | 6 |
| 5 | <b>86.0964</b>  | <b>635.3035</b> | 318.1554        | 618.2770        | 309.6421         | 617.2930        | 309.1501         | I    | <b>604.3301</b> | 302.6687        | 587.3035        | 294.1554         | 586.3195        | 293.6634         | 5 |
| 6 | 74.0600         | 736.3512        | 368.6792        | 719.3246        | 360.1660         | 718.3406        | 359.6740         | T    | <b>491.2460</b> | 246.1266        | 474.2195        | 237.6134         | <b>473.2354</b> | <b>237.1214</b>  | 4 |
| 7 | 87.0553         | 850.3941        | 425.7007        | 833.3676        | 417.1874         | 832.3836        | 416.6954         | N    | <b>390.1983</b> | 195.6028        | 373.1718        | 187.0895         | 372.1878        | 186.5975         | 3 |
| 8 | 102.0550        | 979.4367        | 490.2220        | <b>962.4102</b> | 481.7087         | 961.4262        | 481.2167         | E    | <b>276.1554</b> | 138.5813        | 259.1288        | 130.0681         | 258.1448        | 129.5761         | 2 |
| 9 | 101.1073        |                 |                 |                 |                  |                 |                  | K    | <b>147.1128</b> | 74.0600         | 130.0863        | 65.5468          |                 |                  | 1 |

MS/MS Fragmentation of **VAIDTYK**

Found in **P16671**, P16671|CD36\_HUMAN Platelet glycoprotein 4 OS=Homo sapiens GN=CD36 PE=1 SV=2

Match to Query 207: 921.490600 from(461.752576,2+)

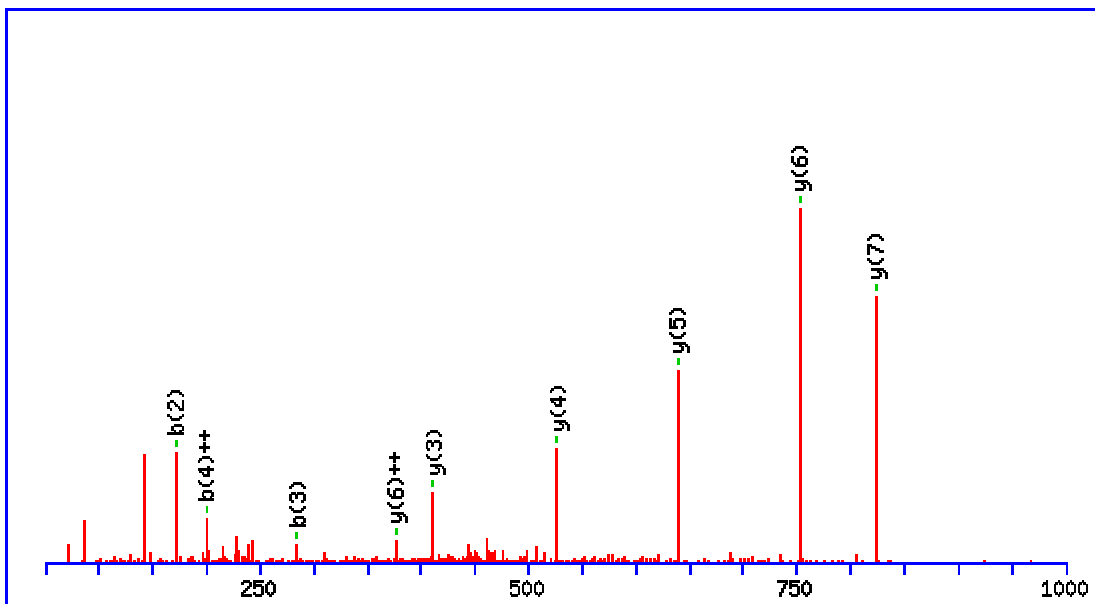

**Monoisotopic mass of neutral peptide Mr(calc):** 921.5171

**Fixed modifications:** Carbamidomethyl (C)

**Ions Score:** 48 **Expect:** 0.0012

**Matches (Bold Red):** 9/66 fragment ions using 11 most intense peaks

| # | Immon.   | b               | b <sup>++</sup> | b <sup>0</sup> | b <sup>0++</sup> | Seq. | y               | y <sup>++</sup> | y <sup>*</sup> | y <sup>*++</sup> | y <sup>0</sup> | y <sup>0++</sup> | # |
|---|----------|-----------------|-----------------|----------------|------------------|------|-----------------|-----------------|----------------|------------------|----------------|------------------|---|
| 1 | 72.0808  | 100.0757        | 50.5415         |                |                  | V    |                 |                 |                |                  |                |                  | 8 |
| 2 | 44.0495  | <b>171.1128</b> | 86.0600         |                |                  | A    | <b>823.4560</b> | 412.2316        | 806.4294       | 403.7184         | 805.4454       | 403.2264         | 7 |
| 3 | 86.0964  | <b>284.1969</b> | 142.6021        |                |                  | I    | <b>752.4189</b> | <b>376.7131</b> | 735.3923       | 368.1998         | 734.4083       | 367.7078         | 6 |
| 4 | 86.0964  | 397.2809        | <b>199.1441</b> |                |                  | I    | <b>639.3348</b> | 320.1710        | 622.3083       | 311.6578         | 621.3243       | 311.1658         | 5 |
| 5 | 88.0393  | 512.3079        | 256.6576        | 494.2973       | 247.6523         | D    | <b>526.2508</b> | 263.6290        | 509.2242       | 255.1157         | 508.2402       | 254.6237         | 4 |
| 6 | 74.0600  | 613.3556        | 307.1814        | 595.3450       | 298.1761         | T    | <b>411.2238</b> | 206.1155        | 394.1973       | 197.6023         | 393.2132       | 197.1103         | 3 |
| 7 | 136.0757 | 776.4189        | 388.7131        | 758.4083       | 379.7078         | Y    | 310.1761        | 155.5917        | 293.1496       | 147.0784         |                |                  | 2 |
| 8 | 101.1073 |                 |                 |                |                  | K    | 147.1128        | 74.0600         | 130.0863       | 65.5468          |                |                  | 1 |

MS/MS Fragmentation of **AVENSSTAIGIR**

Found in **P25788**, P25788|PSA3\_HUMAN Proteasome subunit alpha type-3 OS=Homo sapiens GN=PSMA3 PE=1 SV=2

Match to Query 284: 1216.611298 from(609.312925,2+)

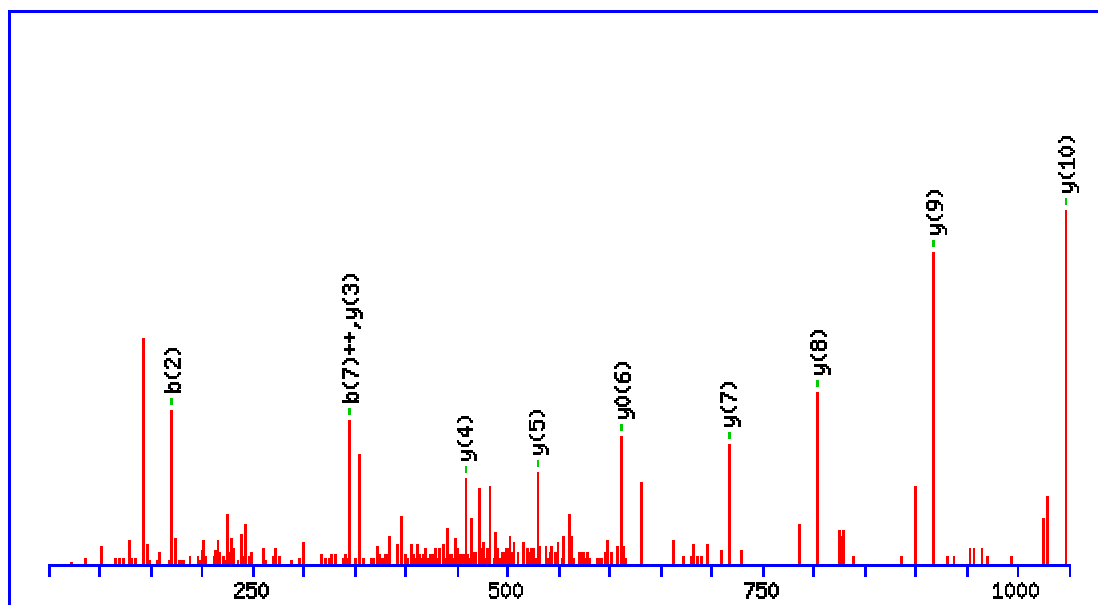

**Monoisotopic mass of neutral peptide Mr(calc):** 1216.6411

**Fixed modifications:** Carbamidomethyl (C)

**Ions Score:** 62 **Expect:** 4.9e-005

**Matches (Bold Red):** 10/124 fragment ions using 12 most intense peaks

| #  | Immon.   | b               | b <sup>++</sup> | b <sup>*</sup> | b <sup>*++</sup> | b <sup>0</sup> | b <sup>0++</sup> | Seq. | y                | y <sup>++</sup> | y <sup>*</sup> | y <sup>*++</sup> | y <sup>0</sup>  | y <sup>0++</sup> | #  |
|----|----------|-----------------|-----------------|----------------|------------------|----------------|------------------|------|------------------|-----------------|----------------|------------------|-----------------|------------------|----|
| 1  | 44.0495  | 72.0444         | 36.5258         |                |                  |                |                  | A    |                  |                 |                |                  |                 |                  | 12 |
| 2  | 72.0808  | <b>171.1128</b> | 86.0600         |                |                  |                |                  | V    | 1146.6113        | 573.8093        | 1129.5848      | 565.2960         | 1128.6008       | 564.8040         | 11 |
| 3  | 102.0550 | 300.1554        | 150.5813        |                |                  | 282.1448       | 141.5761         | E    | <b>1047.5429</b> | 524.2751        | 1030.5164      | 515.7618         | 1029.5323       | 515.2698         | 10 |
| 4  | 87.0553  | 414.1983        | 207.6028        | 397.1718       | 199.0895         | 396.1878       | 198.5975         | N    | <b>918.5003</b>  | 459.7538        | 901.4738       | 451.2405         | 900.4898        | 450.7485         | 9  |
| 5  | 60.0444  | 501.2304        | 251.1188        | 484.2038       | 242.6055         | 483.2198       | 242.1135         | S    | <b>804.4574</b>  | 402.7323        | 787.4308       | 394.2191         | 786.4468        | 393.7271         | 8  |
| 6  | 60.0444  | 588.2624        | 294.6348        | 571.2358       | 286.1216         | 570.2518       | 285.6295         | S    | <b>717.4254</b>  | 359.2163        | 700.3988       | 350.7030         | 699.4148        | 350.2110         | 7  |
| 7  | 74.0600  | 689.3101        | <b>345.1587</b> | 672.2835       | 336.6454         | 671.2995       | 336.1534         | T    | 630.3933         | 315.7003        | 613.3668       | 307.1870         | <b>612.3828</b> | 306.6950         | 6  |
| 8  | 44.0495  | 760.3472        | 380.6772        | 743.3206       | 372.1640         | 742.3366       | 371.6719         | A    | <b>529.3457</b>  | 265.1765        | 512.3191       | 256.6632         |                 |                  | 5  |
| 9  | 86.0964  | 873.4312        | 437.2193        | 856.4047       | 428.7060         | 855.4207       | 428.2140         | I    | <b>458.3085</b>  | 229.6579        | 441.2820       | 221.1446         |                 |                  | 4  |
| 10 | 30.0338  | 930.4527        | 465.7300        | 913.4262       | 457.2167         | 912.4421       | 456.7247         | G    | <b>345.2245</b>  | 173.1159        | 328.1979       | 164.6026         |                 |                  | 3  |
| 11 | 86.0964  | 1043.5368       | 522.2720        | 1026.5102      | 513.7587         | 1025.5262      | 513.2667         | I    | 288.2030         | 144.6051        | 271.1765       | 136.0919         |                 |                  | 2  |
| 12 | 129.1135 |                 |                 |                |                  |                |                  | R    | 175.1190         | 88.0631         | 158.0924       | 79.5498          |                 |                  | 1  |



MS/MS Fragmentation of **LAAIAESGVER**

Found in **P28072**, P28072|PSB6\_HUMAN Proteasome subunit beta type-6 OS=Homo sapiens GN=PSMB6  
 PE=1 SV=4

Match to Query 405: 1114.625244 from(558.319898,2+)

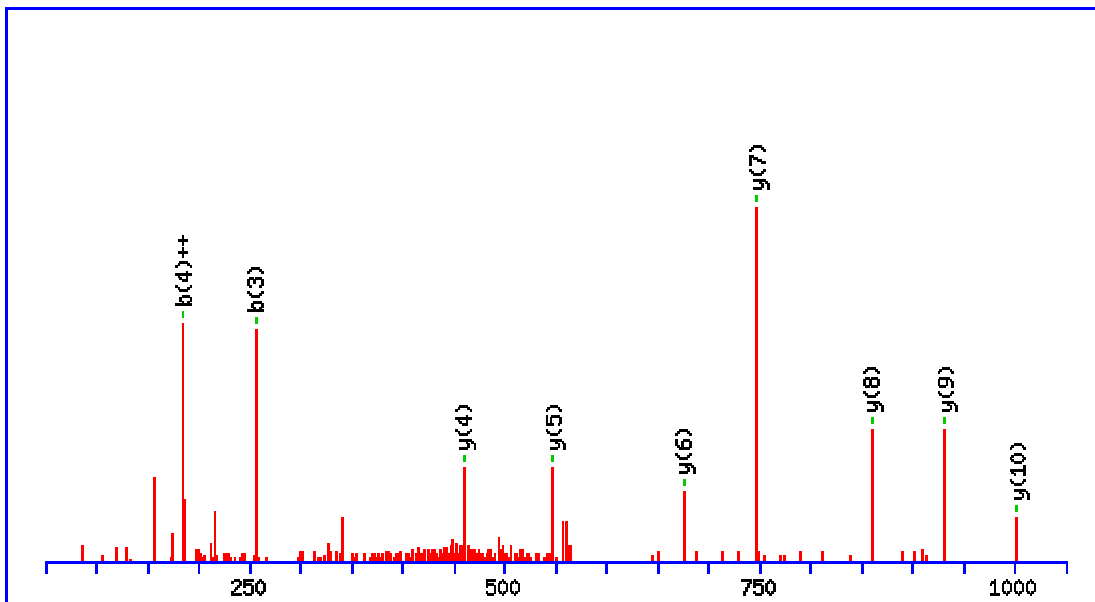

**Monoisotopic mass of neutral peptide Mr(calc):** 1114.5982

**Fixed modifications:** Carbamidomethyl (C)

**Ions Score:** 70 **Expect:** 7.1e-006

**Matches (Bold Red):** 10/99 fragment ions using 10 most intense peaks

| #  | Immon.   | b               | b <sup>++</sup> | b <sup>0</sup> | b <sup>0++</sup> | Seq. | y                | y <sup>++</sup> | y <sup>*</sup> | y <sup>*++</sup> | y <sup>0</sup> | y <sup>0++</sup> | #  |
|----|----------|-----------------|-----------------|----------------|------------------|------|------------------|-----------------|----------------|------------------|----------------|------------------|----|
| 1  | 86.0964  | 114.0913        | 57.5493         |                |                  | L    |                  |                 |                |                  |                |                  | 11 |
| 2  | 44.0495  | <b>185.1285</b> | 93.0679         |                |                  | A    | <b>1002.5215</b> | 501.7644        | 985.4949       | 493.2511         | 984.5109       | 492.7591         | 10 |
| 3  | 44.0495  | <b>256.1656</b> | 128.5864        |                |                  | A    | <b>931.4843</b>  | 466.2458        | 914.4578       | 457.7325         | 913.4738       | 457.2405         | 9  |
| 4  | 86.0964  | 369.2496        | <b>185.1285</b> |                |                  | I    | <b>860.4472</b>  | 430.7272        | 843.4207       | 422.2140         | 842.4367       | 421.7220         | 8  |
| 5  | 44.0495  | 440.2867        | 220.6470        |                |                  | A    | <b>747.3632</b>  | 374.1852        | 730.3366       | 365.6719         | 729.3526       | 365.1799         | 7  |
| 6  | 102.0550 | 569.3293        | 285.1683        | 551.3188       | 276.1630         | E    | <b>676.3260</b>  | 338.6667        | 659.2995       | 330.1534         | 658.3155       | 329.6614         | 6  |
| 7  | 60.0444  | 656.3614        | 328.6843        | 638.3508       | 319.6790         | S    | <b>547.2835</b>  | 274.1454        | 530.2569       | 265.6321         | 529.2729       | 265.1401         | 5  |
| 8  | 30.0338  | 713.3828        | 357.1951        | 695.3723       | 348.1898         | G    | <b>460.2514</b>  | 230.6293        | 443.2249       | 222.1161         | 442.2409       | 221.6241         | 4  |
| 9  | 72.0808  | 812.4512        | 406.7293        | 794.4407       | 397.7240         | V    | 403.2300         | 202.1186        | 386.2034       | 193.6053         | 385.2194       | 193.1133         | 3  |
| 10 | 102.0550 | 941.4938        | 471.2506        | 923.4833       | 462.2453         | E    | 304.1615         | 152.5844        | 287.1350       | 144.0711         | 286.1510       | 143.5791         | 2  |
| 11 | 129.1135 |                 |                 |                |                  | R    | 175.1190         | 88.0631         | 158.0924       | 79.5498          |                |                  | 1  |

MS/MS Fragmentation of **AAAGGGGGGAAAAGR**

Found in **Q9UL25**, Q9UL25|RAB21\_HUMAN Ras-related protein Rab-21 OS=Homo sapiens GN=RAB21 PE=1 SV=3

Match to Query 355: 1112.583686 from(557.299119,2,+)

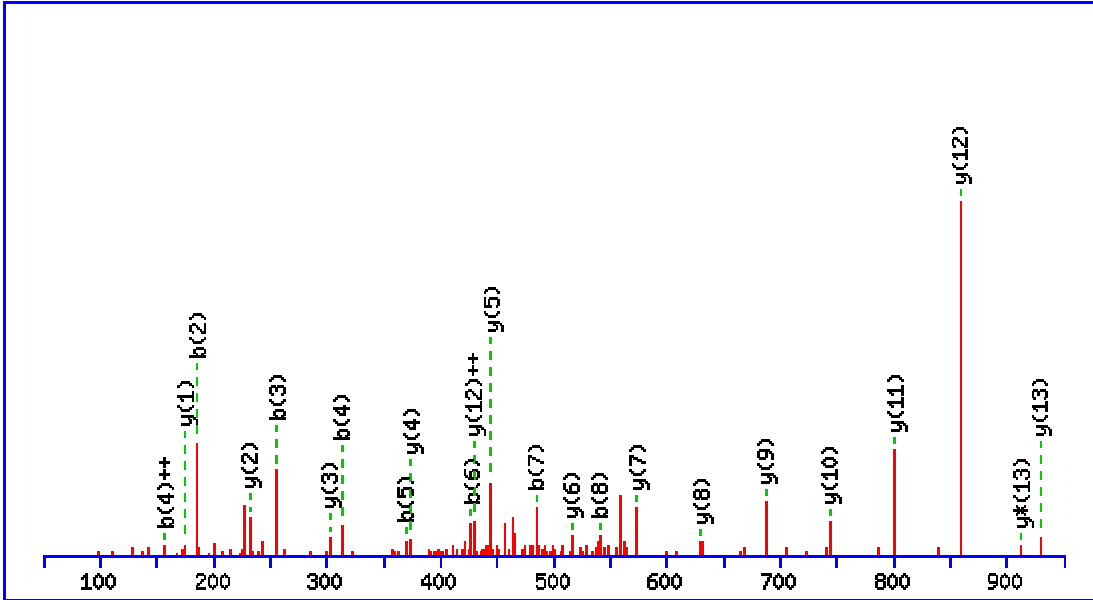

**Monoisotopic mass of neutral peptide Mr(calc):** 1112.5323

**Fixed modifications:** Carbamidomethyl (C)

**Variable modifications:**

**N-term :** Acetyl (Protein N-term)

**Ions Score:** 110 **Expect:** 7.3e-010

**Matches (Bold Red):** 23/99 fragment ions using 36 most intense peaks

| #  | Immon.   | b               | b <sup>++</sup> | Seq. | y               | y <sup>++</sup> | y*              | y <sup>***</sup> | #  |
|----|----------|-----------------|-----------------|------|-----------------|-----------------|-----------------|------------------|----|
| 1  | 44.0495  | 114.0549        | 57.5311         | A    |                 |                 |                 |                  | 15 |
| 2  | 44.0495  | <b>185.0921</b> | 93.0497         | A    | 1000.4919       | 500.7496        | 983.4653        | 492.2363         | 14 |
| 3  | 44.0495  | <b>256.1292</b> | 128.5682        | A    | <b>929.4548</b> | 465.2310        | <b>912.4282</b> | 456.7177         | 13 |
| 4  | 30.0338  | <b>313.1506</b> | <b>157.0790</b> | G    | <b>858.4177</b> | <b>429.7125</b> | 841.3911        | 421.1992         | 12 |
| 5  | 30.0338  | <b>370.1721</b> | 185.5897        | G    | <b>801.3962</b> | 401.2017        | 784.3696        | 392.6885         | 11 |
| 6  | 30.0338  | <b>427.1936</b> | 214.1004        | G    | <b>744.3747</b> | 372.6910        | 727.3482        | 364.1777         | 10 |
| 7  | 30.0338  | <b>484.2150</b> | 242.6112        | G    | <b>687.3533</b> | 344.1803        | 670.3267        | 335.6670         | 9  |
| 8  | 30.0338  | <b>541.2365</b> | 271.1219        | G    | <b>630.3318</b> | 315.6695        | 613.3053        | 307.1563         | 8  |
| 9  | 30.0338  | 598.2580        | 299.6326        | G    | <b>573.3103</b> | 287.1588        | 556.2838        | 278.6455         | 7  |
| 10 | 44.0495  | 669.2951        | 335.1512        | A    | <b>516.2889</b> | 258.6481        | 499.2623        | 250.1348         | 6  |
| 11 | 44.0495  | 740.3322        | 370.6697        | A    | <b>445.2518</b> | 223.1295        | 428.2252        | 214.6162         | 5  |
| 12 | 44.0495  | 811.3693        | 406.1883        | A    | <b>374.2146</b> | 187.6110        | 357.1881        | 179.0977         | 4  |
| 13 | 44.0495  | 882.4064        | 441.7068        | A    | <b>303.1775</b> | 152.0924        | 286.1510        | 143.5791         | 3  |
| 14 | 30.0338  | 939.4279        | 470.2176        | G    | <b>232.1404</b> | 116.5738        | 215.1139        | 108.0606         | 2  |
| 15 | 129.1135 |                 |                 | R    | <b>175.1190</b> | 88.0631         | 158.0924        | 79.5498          | 1  |

MS/MS Fragmentation of **MIETAQVDER**

Found in **Q9UL25**, Q9UL25|RAB21\_HUMAN Ras-related protein Rab-21 OS=Homo sapiens GN=RAB21 PE=1 SV=3

Match to Query 192: 1206.520130 from(604.267341,2,+)

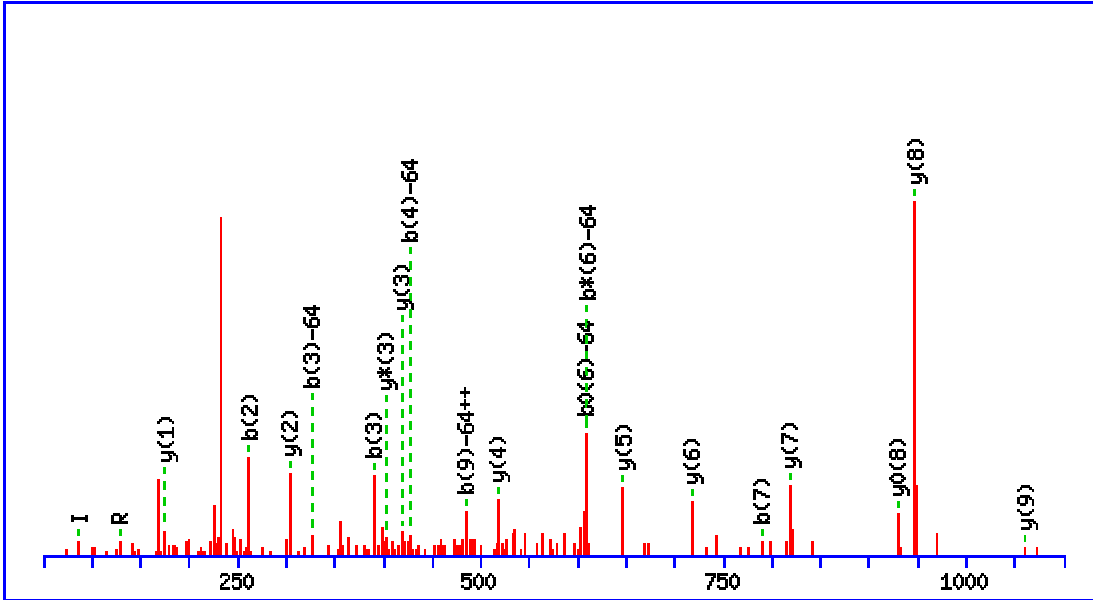

**Monoisotopic mass of neutral peptide Mr(calc):** 1206.5550

**Fixed modifications:** Carbamidomethyl (C)

**Variable modifications:**

**M1** : Oxidation (M), with neutral losses 63.9983(shown in table), 0.0000

**Ions Score:** 55 **Expect:** 0.00024

**Matches (Bold Red):** 21/143 fragment ions using 53 most intense peaks

| #  | Immon.          | b               | b <sup>++</sup> | b <sup>*</sup>  | b <sup>***</sup> | b <sup>0</sup>  | b <sup>0++</sup> | Seq.     | y                | y <sup>++</sup> | y <sup>*</sup>  | y <sup>***</sup> | y <sup>0</sup>  | y <sup>0++</sup> | #         |
|----|-----------------|-----------------|-----------------|-----------------|------------------|-----------------|------------------|----------|------------------|-----------------|-----------------|------------------|-----------------|------------------|-----------|
| 1  | 56.0495         | 84.0444         | 42.5258         |                 |                  |                 |                  | <b>M</b> |                  |                 |                 |                  |                 |                  | <b>10</b> |
| 2  | <b>86.0964</b>  | 197.1285        | 99.0679         |                 |                  |                 |                  | <b>I</b> | <b>1060.5269</b> | 530.7671        | 1043.5004       | 522.2538         | 1042.5164       | 521.7618         | <b>9</b>  |
| 3  | 102.0550        | <b>326.1711</b> | 163.5892        |                 |                  | 308.1605        | 154.5839         | <b>E</b> | <b>947.4429</b>  | 474.2251        | 930.4163        | 465.7118         | <b>929.4323</b> | 465.2198         | <b>8</b>  |
| 4  | 74.0600         | <b>427.2187</b> | 214.1130        |                 |                  | 409.2082        | 205.1077         | <b>T</b> | <b>818.4003</b>  | 409.7038        | 801.3737        | 401.1905         | 800.3897        | 400.6985         | <b>7</b>  |
| 5  | 44.0495         | 498.2558        | 249.6316        |                 |                  | 480.2453        | 240.6263         | <b>A</b> | <b>717.3526</b>  | 359.1799        | 700.3260        | 350.6667         | 699.3420        | 350.1747         | <b>6</b>  |
| 6  | 101.0709        | 626.3144        | 313.6608        | <b>609.2879</b> | 305.1476         | <b>608.3039</b> | 304.6556         | <b>Q</b> | <b>646.3155</b>  | 323.6614        | 629.2889        | 315.1481         | 628.3049        | 314.6561         | <b>5</b>  |
| 7  | 72.0808         | 725.3828        | 363.1951        | 708.3563        | 354.6818         | 707.3723        | 354.1898         | <b>V</b> | <b>518.2569</b>  | 259.6321        | 501.2304        | 251.1188         | 500.2463        | 250.6268         | <b>4</b>  |
| 8  | 88.0393         | 840.4098        | 420.7085        | 823.3832        | 412.1953         | 822.3992        | 411.7032         | <b>D</b> | <b>419.1885</b>  | 210.0979        | <b>402.1619</b> | 201.5846         | 401.1779        | 201.0926         | <b>3</b>  |
| 9  | 102.0550        | 969.4524        | <b>485.2298</b> | 952.4258        | 476.7165         | 951.4418        | 476.2245         | <b>E</b> | <b>304.1615</b>  | 152.5844        | 287.1350        | 144.0711         | 286.1510        | 143.5791         | <b>2</b>  |
| 10 | <b>129.1135</b> |                 |                 |                 |                  |                 |                  | <b>R</b> | <b>175.1190</b>  | 88.0631         | 158.0924        | 79.5498          |                 |                  | <b>1</b>  |

MS/MS Fragmentation of **VGQDPVLR**

Found in **Q04837**, Q04837|SSB\_HUMAN Single-stranded DNA-binding protein, mitochondrial OS=Homo sapiens GN=SSBP1 PE=1 SV=1

Match to Query 73: 882.385506 from(442.200029,2+)

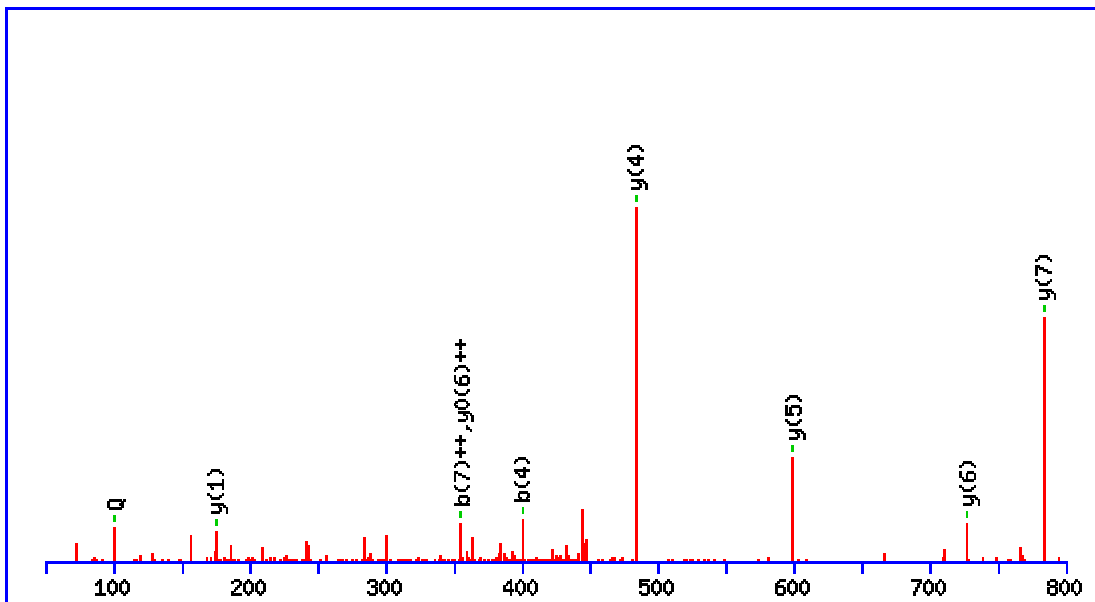

Monoisotopic mass of neutral peptide  $M_r(\text{calc})$ : 882.4923

Fixed modifications: Carbamidomethyl (C)

Ions Score: 49 Expect: 0.00078

Matches (**Bold Red**): 9/74 fragment ions using 9 most intense peaks

| # | Immon.          | b               | b <sup>++</sup> | b <sup>*</sup> | b <sup>*++</sup> | b <sup>0</sup> | b <sup>0++</sup> | Seq. | y               | y <sup>++</sup> | y <sup>*</sup> | y <sup>*++</sup> | y <sup>0</sup> | y <sup>0++</sup> | # |
|---|-----------------|-----------------|-----------------|----------------|------------------|----------------|------------------|------|-----------------|-----------------|----------------|------------------|----------------|------------------|---|
| 1 | 72.0808         | 100.0757        | 50.5415         |                |                  |                |                  | V    |                 |                 |                |                  |                |                  | 8 |
| 2 | 30.0338         | 157.0972        | 79.0522         |                |                  |                |                  | G    | <b>784.4312</b> | 392.7192        | 767.4046       | 384.2060         | 766.4206       | 383.7139         | 7 |
| 3 | <b>101.0709</b> | 285.1557        | 143.0815        | 268.1292       | 134.5682         |                |                  | Q    | <b>727.4097</b> | 364.2085        | 710.3832       | 355.6952         | 709.3991       | <b>355.2032</b>  | 6 |
| 4 | 88.0393         | <b>400.1827</b> | 200.5950        | 383.1561       | 192.0817         | 382.1721       | 191.5897         | D    | <b>599.3511</b> | 300.1792        | 582.3246       | 291.6659         | 581.3406       | 291.1739         | 5 |
| 5 | 70.0651         | 497.2354        | 249.1214        | 480.2089       | 240.6081         | 479.2249       | 240.1161         | P    | <b>484.3242</b> | 242.6657        | 467.2976       | 234.1525         |                |                  | 4 |
| 6 | 72.0808         | 596.3039        | 298.6556        | 579.2773       | 290.1423         | 578.2933       | 289.6503         | V    | 387.2714        | 194.1394        | 370.2449       | 185.6261         |                |                  | 3 |
| 7 | 86.0964         | 709.3879        | <b>355.1976</b> | 692.3614       | 346.6843         | 691.3774       | 346.1923         | L    | 288.2030        | 144.6051        | 271.1765       | 136.0919         |                |                  | 2 |
| 8 | 129.1135        |                 |                 |                |                  |                |                  | R    | <b>175.1190</b> | 88.0631         | 158.0924       | 79.5498          |                |                  | 1 |

MS/MS Fragmentation of **ESGLETVAK**

Found in **Q8TED4**, Q8TED4|SPX2\_HUMAN Sugar phosphate exchanger 2 OS=Homo sapiens GN=SLC37A2  
 PE=2 SV=2

Match to Query 193: 932.472836 from(467.243694,2+)

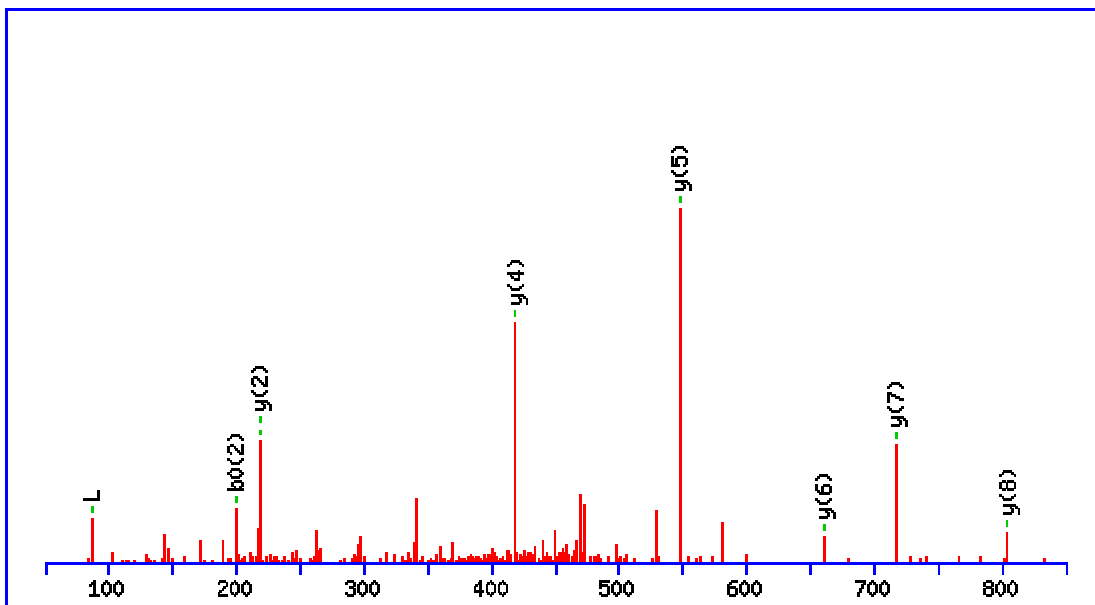

Monoisotopic mass of neutral peptide  $M_r(\text{calc})$ : 932.4815

Fixed modifications: Carbamidomethyl (C)

Ions Score: 60 Expect: 9.6e-005

Matches (**Bold Red**): 8/83 fragment ions using 10 most intense peaks

| # | Immon.         | b        | b <sup>++</sup> | b <sup>0</sup>  | b <sup>0++</sup> | Seq.     | y               | y <sup>++</sup> | y*       | y <sup>*++</sup> | y <sup>0</sup> | y <sup>0++</sup> | # |
|---|----------------|----------|-----------------|-----------------|------------------|----------|-----------------|-----------------|----------|------------------|----------------|------------------|---|
| 1 | 102.0550       | 130.0499 | 65.5286         | 112.0393        | 56.5233          | <b>E</b> |                 |                 |          |                  |                |                  | 9 |
| 2 | 60.0444        | 217.0819 | 109.0446        | <b>199.0713</b> | 100.0393         | <b>S</b> | <b>804.4462</b> | 402.7267        | 787.4196 | 394.2134         | 786.4356       | 393.7214         | 8 |
| 3 | 30.0338        | 274.1034 | 137.5553        | 256.0928        | 128.5500         | <b>G</b> | <b>717.4141</b> | 359.2107        | 700.3876 | 350.6974         | 699.4036       | 350.2054         | 7 |
| 4 | <b>86.0964</b> | 387.1874 | 194.0974        | 369.1769        | 185.0921         | <b>L</b> | <b>660.3927</b> | 330.7000        | 643.3661 | 322.1867         | 642.3821       | 321.6947         | 6 |
| 5 | 102.0550       | 516.2300 | 258.6186        | 498.2195        | 249.6134         | <b>E</b> | <b>547.3086</b> | 274.1579        | 530.2821 | 265.6447         | 529.2980       | 265.1527         | 5 |
| 6 | 74.0600        | 617.2777 | 309.1425        | 599.2671        | 300.1372         | <b>T</b> | <b>418.2660</b> | 209.6366        | 401.2395 | 201.1234         | 400.2554       | 200.6314         | 4 |
| 7 | 72.0808        | 716.3461 | 358.6767        | 698.3355        | 349.6714         | <b>V</b> | 317.2183        | 159.1128        | 300.1918 | 150.5995         |                |                  | 3 |
| 8 | 44.0495        | 787.3832 | 394.1953        | 769.3727        | 385.1900         | <b>A</b> | <b>218.1499</b> | 109.5786        | 201.1234 | 101.0653         |                |                  | 2 |
| 9 | 101.1073       |          |                 |                 |                  | <b>K</b> | 147.1128        | 74.0600         | 130.0863 | 65.5468          |                |                  | 1 |

MS/MS Fragmentation of **VDVTEQPGLSGR**

Found in **Q9H3N1**, Q9H3N1|TXND1\_HUMAN Thioredoxin domain-containing protein 1 OS=Homo sapiens  
 GN=TXNDC1 PE=1 SV=1

Match to Query 388: 1256.691118 from(629.352835,2+)

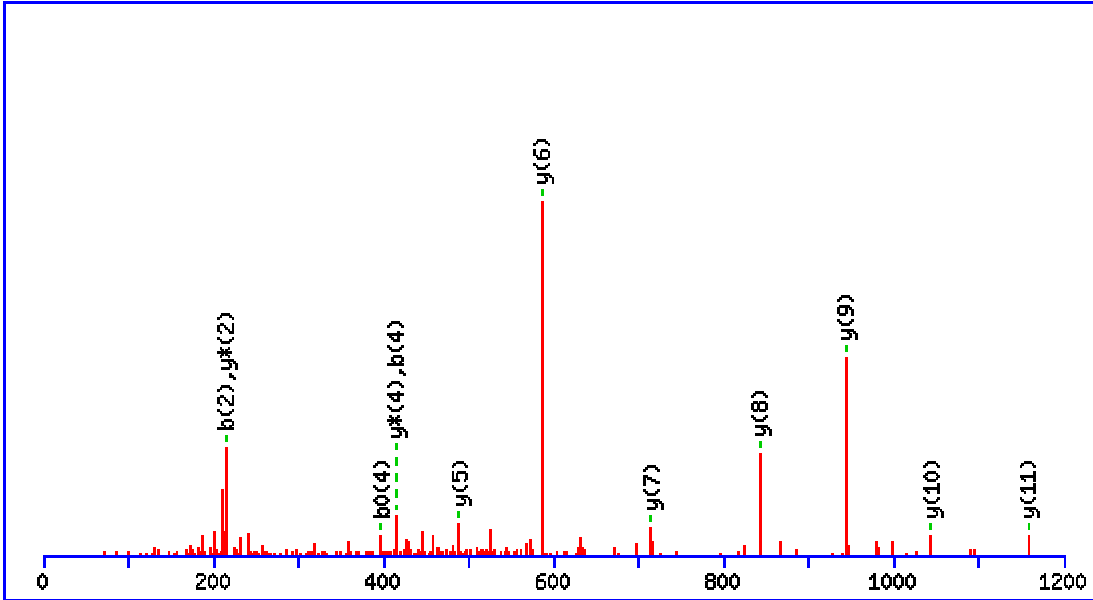

Monoisotopic mass of neutral peptide Mr(calc): 1256.6361

Fixed modifications: Carbamidomethyl (C)

Ions Score: 64 Expect: 3.1e-005

Matches (**Bold Red**): 12/128 fragment ions using 20 most intense peaks

| #  | Immon.   | b               | b <sup>++</sup> | b <sup>*</sup> | b <sup>*++</sup> | b <sup>0</sup>  | b <sup>0++</sup> | Seq. | y                | y <sup>++</sup> | y <sup>*</sup>  | y <sup>*++</sup> | y <sup>0</sup> | y <sup>0++</sup> | #  |
|----|----------|-----------------|-----------------|----------------|------------------|-----------------|------------------|------|------------------|-----------------|-----------------|------------------|----------------|------------------|----|
| 1  | 72.0808  | 100.0757        | 50.5415         |                |                  |                 |                  | V    |                  |                 |                 |                  |                |                  | 12 |
| 2  | 88.0393  | <b>215.1026</b> | 108.0550        |                |                  | 197.0921        | 99.0497          | D    | <b>1158.5749</b> | 579.7911        | 1141.5484       | 571.2778         | 1140.5644      | 570.7858         | 11 |
| 3  | 72.0808  | 314.1710        | 157.5892        |                |                  | 296.1605        | 148.5839         | V    | <b>1043.5480</b> | 522.2776        | 1026.5215       | 513.7644         | 1025.5374      | 513.2724         | 10 |
| 4  | 74.0600  | <b>415.2187</b> | 208.1130        |                |                  | <b>397.2082</b> | 199.1077         | T    | <b>944.4796</b>  | 472.7434        | 927.4530        | 464.2302         | 926.4690       | 463.7381         | 9  |
| 5  | 102.0550 | 544.2613        | 272.6343        |                |                  | 526.2508        | 263.6290         | E    | <b>843.4319</b>  | 422.2196        | 826.4054        | 413.7063         | 825.4213       | 413.2143         | 8  |
| 6  | 101.0709 | 672.3199        | 336.6636        | 655.2933       | 328.1503         | 654.3093        | 327.6583         | Q    | <b>714.3893</b>  | 357.6983        | 697.3628        | 349.1850         | 696.3787       | 348.6930         | 7  |
| 7  | 70.0651  | 769.3727        | 385.1900        | 752.3461       | 376.6767         | 751.3621        | 376.1847         | P    | <b>586.3307</b>  | 293.6690        | 569.3042        | 285.1557         | 568.3202       | 284.6637         | 6  |
| 8  | 30.0338  | 826.3941        | 413.7007        | 809.3676       | 405.1874         | 808.3836        | 404.6954         | G    | <b>489.2780</b>  | 245.1426        | 472.2514        | 236.6293         | 471.2674       | 236.1373         | 5  |
| 9  | 86.0964  | 939.4782        | 470.2427        | 922.4516       | 461.7295         | 921.4676        | 461.2375         | L    | 432.2565         | 216.6319        | <b>415.2300</b> | 208.1186         | 414.2459       | 207.6266         | 4  |
| 10 | 60.0444  | 1026.5102       | 513.7587        | 1009.4837      | 505.2455         | 1008.4997       | 504.7535         | S    | 319.1724         | 160.0899        | 302.1459        | 151.5766         | 301.1619       | 151.0846         | 3  |
| 11 | 30.0338  | 1083.5317       | 542.2695        | 1066.5051      | 533.7562         | 1065.5211       | 533.2642         | G    | 232.1404         | 116.5738        | <b>215.1139</b> | 108.0606         |                |                  | 2  |
| 12 | 129.1135 |                 |                 |                |                  |                 |                  | R    | 175.1190         | 88.0631         | 158.0924        | 79.5498          |                |                  | 1  |

MS/MS Fragmentation of **VPITAVIAAK**

Found in **P29144**, P29144|TPP2\_HUMAN Tripeptidyl-peptidase 2 OS=Homo sapiens GN=TPP2 PE=1 SV=4

Match to Query 322: 981.593466 from(491.804009,2+)

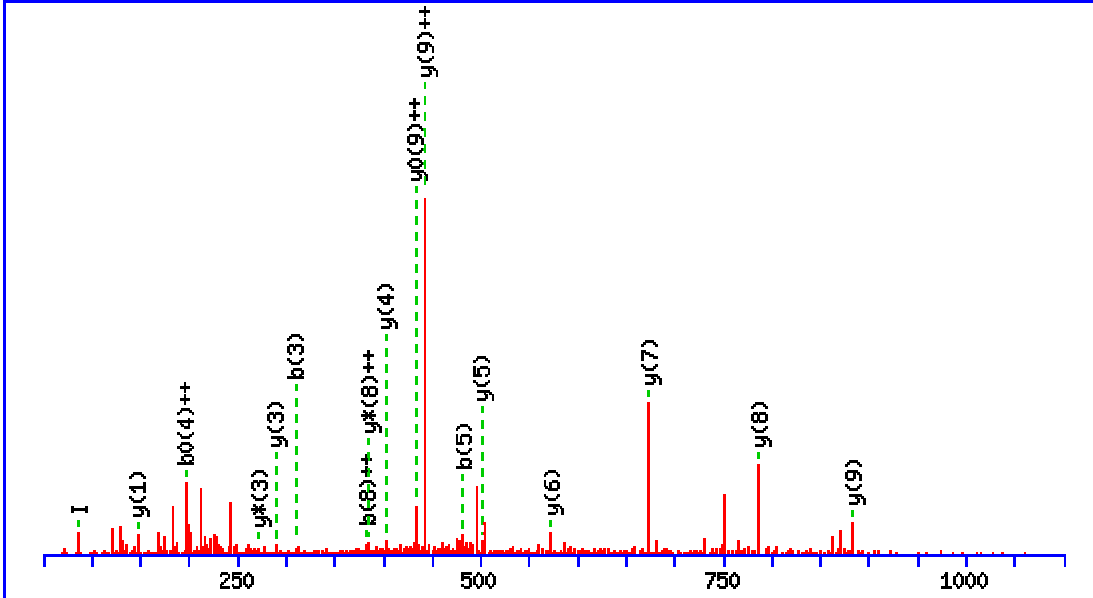

Monoisotopic mass of neutral peptide Mr(calc): 981.6223

Fixed modifications: Carbamidomethyl (C)

Ions Score: 38 Expect: 0.01

Matches (Bold Red): 20/82 fragment ions using 52 most intense peaks

| #  | Immon.         | b               | b <sup>++</sup> | b <sup>0</sup> | b <sup>0++</sup> | Seq. | y               | y <sup>++</sup> | y*              | y <sup>*++</sup> | y <sup>0</sup> | y <sup>0++</sup> | #  |
|----|----------------|-----------------|-----------------|----------------|------------------|------|-----------------|-----------------|-----------------|------------------|----------------|------------------|----|
| 1  | 72.0808        | 100.0757        | 50.5415         |                |                  | V    |                 |                 |                 |                  |                |                  | 10 |
| 2  | 70.0651        | <b>197.1285</b> | 99.0679         |                |                  | P    | <b>883.5611</b> | <b>442.2842</b> | 866.5346        | 433.7709         | 865.5506       | <b>433.2789</b>  | 9  |
| 3  | <b>86.0964</b> | <b>310.2125</b> | 155.6099        |                |                  | I    | <b>786.5084</b> | 393.7578        | 769.4818        | <b>385.2445</b>  | 768.4978       | 384.7525         | 8  |
| 4  | 74.0600        | 411.2602        | 206.1337        | 393.2496       | <b>197.1285</b>  | T    | <b>673.4243</b> | 337.2158        | 656.3978        | 328.7025         | 655.4137       | 328.2105         | 7  |
| 5  | 44.0495        | <b>482.2973</b> | 241.6523        | 464.2867       | 232.6470         | A    | <b>572.3766</b> | 286.6920        | 555.3501        | 278.1787         |                |                  | 6  |
| 6  | 72.0808        | 581.3657        | 291.1865        | 563.3552       | 282.1812         | V    | <b>501.3395</b> | 251.1734        | 484.3130        | 242.6601         |                |                  | 5  |
| 7  | <b>86.0964</b> | 694.4498        | 347.7285        | 676.4392       | 338.7233         | I    | <b>402.2711</b> | 201.6392        | <b>385.2445</b> | 193.1259         |                |                  | 4  |
| 8  | 44.0495        | 765.4869        | <b>383.2471</b> | 747.4763       | 374.2418         | A    | <b>289.1870</b> | 145.0972        | <b>272.1605</b> | 136.5839         |                |                  | 3  |
| 9  | 44.0495        | 836.5240        | 418.7656        | 818.5135       | 409.7604         | A    | 218.1499        | 109.5786        | 201.1234        | 101.0653         |                |                  | 2  |
| 10 | 101.1073       |                 |                 |                |                  | K    | <b>147.1128</b> | 74.0600         | 130.0863        | 65.5468          |                |                  | 1  |

MS/MS Fragmentation of **MSADPNSSIFLDTAK**

Found in **P23381**, P23381|SYWC\_HUMAN Tryptophanyl-tRNA synthetase, cytoplasmic OS=Homo sapiens  
GN=WARS PE=1 SV=2

Match to Query 515: 1799.802566 from(900.908559,2+)

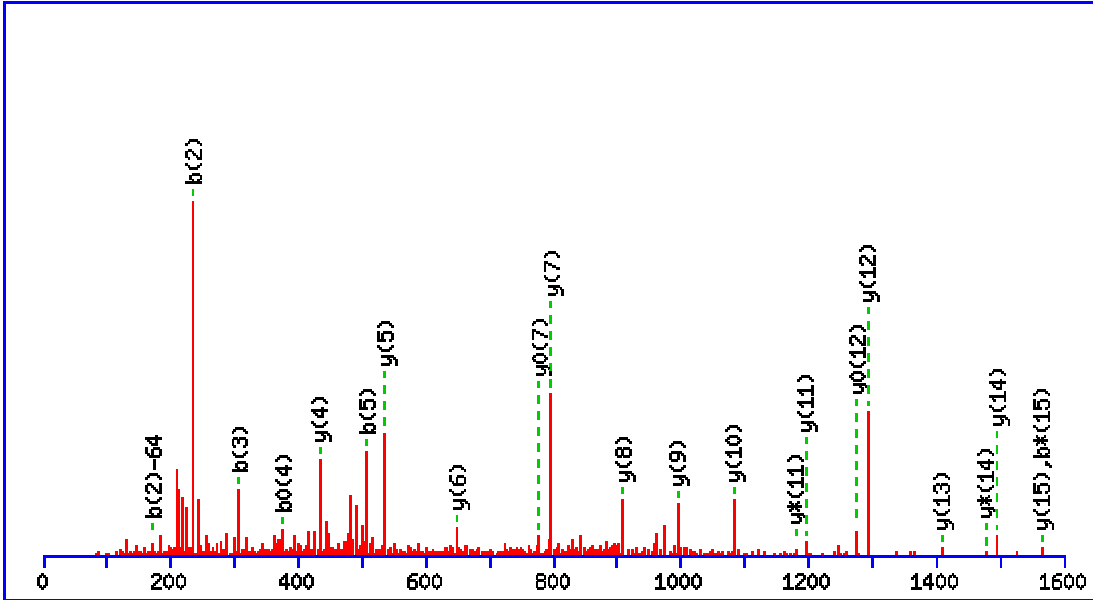

**Monoisotopic mass of neutral peptide Mr(calc):** 1799.8247

**Fixed modifications:** Carbamidomethyl (C)

**Variable modifications:**

**M1** : Oxidation (M), with neutral losses 0.0000(shown in table), 63.9983

**Ions Score:** 99 **Expect:** 8.5e-009

**Matches (Bold Red):** 22/274 fragment ions using 31 most intense peaks

| #  | Immon.   | b               | b <sup>++</sup> | b*               | b <sup>***</sup> | b <sup>0</sup>  | b <sup>0++</sup> | Seq. | y                | y <sup>++</sup> | y*               | y <sup>***</sup> | y <sup>0</sup>   | y <sup>0++</sup> | #  |
|----|----------|-----------------|-----------------|------------------|------------------|-----------------|------------------|------|------------------|-----------------|------------------|------------------|------------------|------------------|----|
| 1  | 120.0478 | 148.0427        | 74.5250         |                  |                  |                 |                  | M    |                  |                 |                  |                  |                  |                  | 17 |
| 2  | 60.0444  | <b>235.0747</b> | 118.0410        |                  |                  | 217.0641        | 109.0357         | S    | 1653.7966        | 827.4019        | 1636.7701        | 818.8887         | 1635.7861        | 818.3967         | 16 |
| 3  | 44.0495  | <b>306.1118</b> | 153.5595        |                  |                  | 288.1013        | 144.5543         | A    | <b>1566.7646</b> | 783.8859        | 1549.7380        | 775.3727         | 1548.7540        | 774.8807         | 15 |
| 4  | 60.0444  | 393.1438        | 197.0756        |                  |                  | <b>375.1333</b> | 188.0703         | S    | <b>1495.7275</b> | 748.3674        | <b>1478.7009</b> | 739.8541         | 1477.7169        | 739.3621         | 14 |
| 5  | 88.0393  | <b>508.1708</b> | 254.5890        |                  |                  | 490.1602        | 245.5838         | D    | <b>1408.6955</b> | 704.8514        | 1391.6689        | 696.3381         | 1390.6849        | 695.8461         | 13 |
| 6  | 70.0651  | 605.2236        | 303.1154        |                  |                  | 587.2130        | 294.1101         | P    | <b>1293.6685</b> | 647.3379        | 1276.6420        | 638.8246         | <b>1275.6579</b> | 638.3326         | 12 |
| 7  | 87.0553  | 719.2665        | 360.1369        | 702.2399         | 351.6236         | 701.2559        | 351.1316         | N    | <b>1196.6157</b> | 598.8115        | <b>1179.5892</b> | 590.2982         | 1178.6052        | 589.8062         | 11 |
| 8  | 60.0444  | 806.2985        | 403.6529        | 789.2720         | 395.1396         | 788.2879        | 394.6476         | S    | <b>1082.5728</b> | 541.7900        | 1065.5463        | 533.2768         | 1064.5623        | 532.7848         | 10 |
| 9  | 60.0444  | 893.3305        | 447.1689        | 876.3040         | 438.6556         | 875.3200        | 438.1636         | S    | <b>995.5408</b>  | 498.2740        | 978.5142         | 489.7608         | 977.5302         | 489.2688         | 9  |
| 10 | 86.0964  | 1006.4146       | 503.7109        | 989.3881         | 495.1977         | 988.4040        | 494.7057         | I    | <b>908.5088</b>  | 454.7580        | 891.4822         | 446.2447         | 890.4982         | 445.7527         | 8  |
| 11 | 120.0808 | 1153.4830       | 577.2451        | 1136.4565        | 568.7319         | 1135.4725       | 568.2399         | F    | <b>795.4247</b>  | 398.2160        | 778.3981         | 389.7027         | <b>777.4141</b>  | 389.2107         | 7  |
| 12 | 86.0964  | 1266.5671       | 633.7872        | 1249.5405        | 625.2739         | 1248.5565       | 624.7819         | L    | <b>648.3563</b>  | 324.6818        | 631.3297         | 316.1685         | 630.3457         | 315.6765         | 6  |
| 13 | 74.0600  | 1367.6148       | 684.3110        | 1350.5882        | 675.7977         | 1349.6042       | 675.3057         | T    | <b>535.2722</b>  | 268.1397        | 518.2457         | 259.6265         | 517.2617         | 259.1345         | 5  |
| 14 | 88.0393  | 1482.6417       | 741.8245        | 1465.6152        | 733.3112         | 1464.6311       | 732.8192         | D    | <b>434.2245</b>  | 217.6159        | 417.1980         | 209.1026         | 416.2140         | 208.6106         | 4  |
| 15 | 74.0600  | 1583.6894       | 792.3483        | <b>1566.6628</b> | 783.8351         | 1565.6788       | 783.3430         | T    | 319.1976         | 160.1024        | 302.1710         | 151.5892         | 301.1870         | 151.0972         | 3  |
| 16 | 44.0495  | 1654.7265       | 827.8669        | 1637.6999        | 819.3536         | 1636.7159       | 818.8616         | A    | 218.1499         | 109.5786        | 201.1234         | 101.0653         |                  |                  | 2  |
| 17 | 101.1073 |                 |                 |                  |                  |                 |                  | K    | 147.1128         | 74.0600         | 130.0863         | 65.5468          |                  |                  | 1  |



MS/MS Fragmentation of **NIMTQNVER**

Found in **Q9BV40**, Q9BV40|VAMP8\_HUMAN Vesicle-associated membrane protein 8 OS=Homo sapiens  
 GN=VAMP8 PE=1 SV=1

Match to Query 360: 1119.566328 from(560.790440,2+)

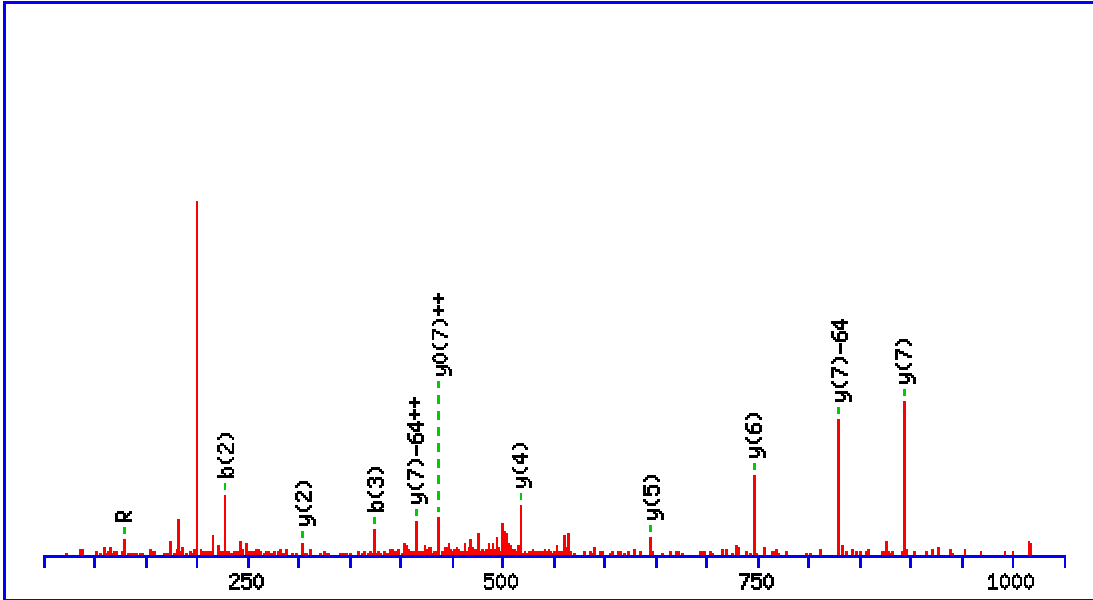

**Monoisotopic mass of neutral peptide Mr(calc):** 1119.5342

**Fixed modifications:** Carbamidomethyl (C)

**Variable modifications:**

**M3** : Oxidation (M), with neutral losses 63.9983(shown in table), 0.0000

**Ions Score:** 35 **Expect:** 0.025

**Matches (Bold Red):** 11/144 fragment ions using 19 most intense peaks

| # | Immon.          | b               | b <sup>++</sup> | b <sup>*</sup> | b <sup>*++</sup> | b <sup>0</sup> | b <sup>0++</sup> | Seq. | y               | y <sup>++</sup> | y <sup>*</sup> | y <sup>*++</sup> | y <sup>0</sup> | y <sup>0++</sup> | # |
|---|-----------------|-----------------|-----------------|----------------|------------------|----------------|------------------|------|-----------------|-----------------|----------------|------------------|----------------|------------------|---|
| 1 | 87.0553         | 115.0502        | 58.0287         | 98.0237        | 49.5155          |                |                  | N    |                 |                 |                |                  |                |                  | 9 |
| 2 | 86.0964         | <b>228.1343</b> | 114.5708        | 211.1077       | 106.0575         |                |                  | I    | 942.5003        | 471.7538        | 925.4738       | 463.2405         | 924.4898       | 462.7485         | 8 |
| 3 | 56.0495         | 311.1714        | 156.0893        | 294.1448       | 147.5761         |                |                  | M    | <b>829.4163</b> | <b>415.2118</b> | 812.3897       | 406.6985         | 811.4057       | 406.2065         | 7 |
| 4 | 74.0600         | 412.2191        | 206.6132        | 395.1925       | 198.0999         | 394.2085       | 197.6079         | T    | <b>746.3791</b> | 373.6932        | 729.3526       | 365.1799         | 728.3686       | 364.6879         | 6 |
| 5 | 101.0709        | 540.2776        | 270.6425        | 523.2511       | 262.1292         | 522.2671       | 261.6372         | Q    | <b>645.3315</b> | 323.1694        | 628.3049       | 314.6561         | 627.3209       | 314.1641         | 5 |
| 6 | 87.0553         | 654.3206        | 327.6639        | 637.2940       | 319.1506         | 636.3100       | 318.6586         | N    | <b>517.2729</b> | 259.1401        | 500.2463       | 250.6268         | 499.2623       | 250.1348         | 4 |
| 7 | 72.0808         | 753.3890        | 377.1981        | 736.3624       | 368.6849         | 735.3784       | 368.1928         | V    | 403.2300        | 202.1186        | 386.2034       | 193.6053         | 385.2194       | 193.1133         | 3 |
| 8 | 102.0550        | 882.4316        | 441.7194        | 865.4050       | 433.2062         | 864.4210       | 432.7141         | E    | <b>304.1615</b> | 152.5844        | 287.1350       | 144.0711         | 286.1510       | 143.5791         | 2 |
| 9 | <b>129.1135</b> |                 |                 |                |                  |                |                  | R    | 175.1190        | 88.0631         | 158.0924       | 79.5498          |                |                  | 1 |

MS/MS Fragmentation of **LSQNNFALGYK**

Found in **Q9Y277**, Q9Y277|VDAC3\_HUMAN Voltage-dependent anion-selective channel protein 3  
 OS=Homo sapiens GN=VDAC3 PE=1 SV=1

Match to Query 384: 1253.670776 from(627.842664,2+)

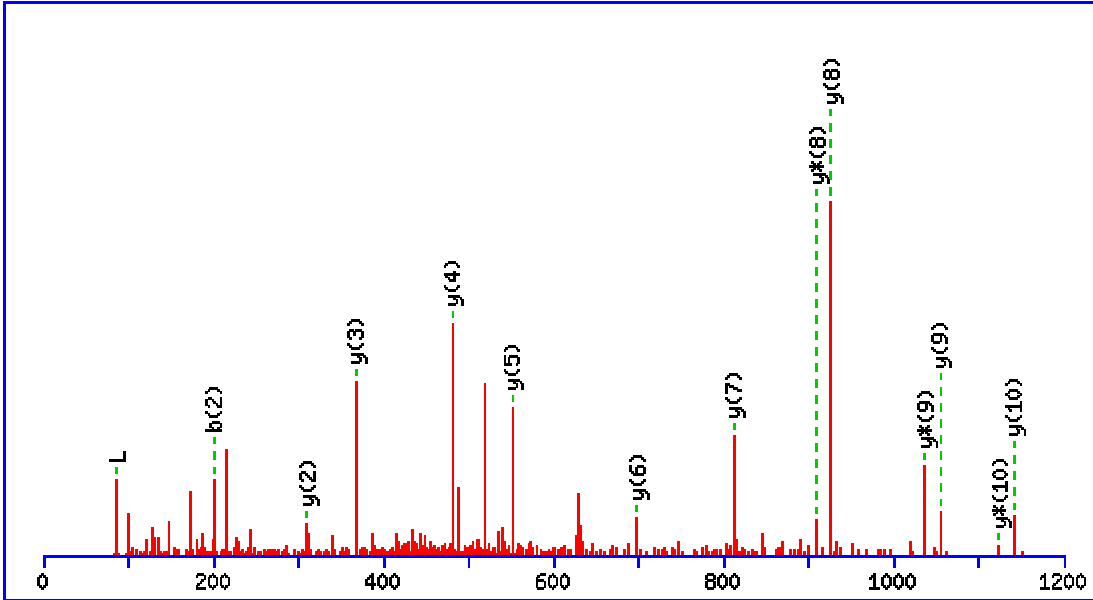

Monoisotopic mass of neutral peptide  $M_r(\text{calc})$ : 1253.6404

Fixed modifications: Carbamidomethyl (C)

Ions Score: 70 Expect: 7.2e-006

Matches (Bold Red): 15/107 fragment ions using 22 most intense peaks

| #  | Immon.         | b               | b <sup>++</sup> | b*        | b <sup>***</sup> | b <sup>0</sup> | b <sup>0++</sup> | Seq. | y                | y <sup>++</sup> | y*               | y <sup>***</sup> | y <sup>0</sup> | y <sup>0++</sup> | #  |
|----|----------------|-----------------|-----------------|-----------|------------------|----------------|------------------|------|------------------|-----------------|------------------|------------------|----------------|------------------|----|
| 1  | <b>86.0964</b> | 114.0913        | 57.5493         |           |                  |                |                  | L    |                  |                 |                  |                  |                |                  | 11 |
| 2  | 60.0444        | <b>201.1234</b> | 101.0653        |           |                  | 183.1128       | 92.0600          | S    | <b>1141.5636</b> | 571.2855        | <b>1124.5371</b> | 562.7722         | 1123.5531      | 562.2802         | 10 |
| 3  | 101.0709       | 329.1819        | 165.0946        | 312.1554  | 156.5813         | 311.1714       | 156.0893         | Q    | <b>1054.5316</b> | 527.7694        | <b>1037.5051</b> | 519.2562         |                |                  | 9  |
| 4  | 87.0553        | 443.2249        | 222.1161        | 426.1983  | 213.6028         | 425.2143       | 213.1108         | N    | <b>926.4730</b>  | 463.7402        | <b>909.4465</b>  | 455.2269         |                |                  | 8  |
| 5  | 87.0553        | 557.2678        | 279.1375        | 540.2413  | 270.6243         | 539.2572       | 270.1323         | N    | <b>812.4301</b>  | 406.7187        | 795.4036         | 398.2054         |                |                  | 7  |
| 6  | 120.0808       | 704.3362        | 352.6717        | 687.3097  | 344.1585         | 686.3256       | 343.6665         | F    | <b>698.3872</b>  | 349.6972        | 681.3606         | 341.1840         |                |                  | 6  |
| 7  | 44.0495        | 775.3733        | 388.1903        | 758.3468  | 379.6770         | 757.3628       | 379.1850         | A    | <b>551.3188</b>  | 276.1630        | 534.2922         | 267.6498         |                |                  | 5  |
| 8  | <b>86.0964</b> | 888.4574        | 444.7323        | 871.4308  | 436.2191         | 870.4468       | 435.7271         | L    | <b>480.2817</b>  | 240.6445        | 463.2551         | 232.1312         |                |                  | 4  |
| 9  | 30.0338        | 945.4789        | 473.2431        | 928.4523  | 464.7298         | 927.4683       | 464.2378         | G    | <b>367.1976</b>  | 184.1024        | 350.1710         | 175.5892         |                |                  | 3  |
| 10 | 136.0757       | 1108.5422       | 554.7747        | 1091.5156 | 546.2615         | 1090.5316      | 545.7694         | Y    | <b>310.1761</b>  | 155.5917        | 293.1496         | 147.0784         |                |                  | 2  |
| 11 | 101.1073       |                 |                 |           |                  |                |                  | K    | 147.1128         | 74.0600         | 130.0863         | 65.5468          |                |                  | 1  |

MS/MS Fragmentation of **IGPLGLSPK**

Found in **P30050**, P30050|RL12\_HUMAN 60S ribosomal protein L12 OS=Homo sapiens GN=RPL12 PE=1 SV=1

Match to Query 170: 880.481382 from(441.247967,2+)

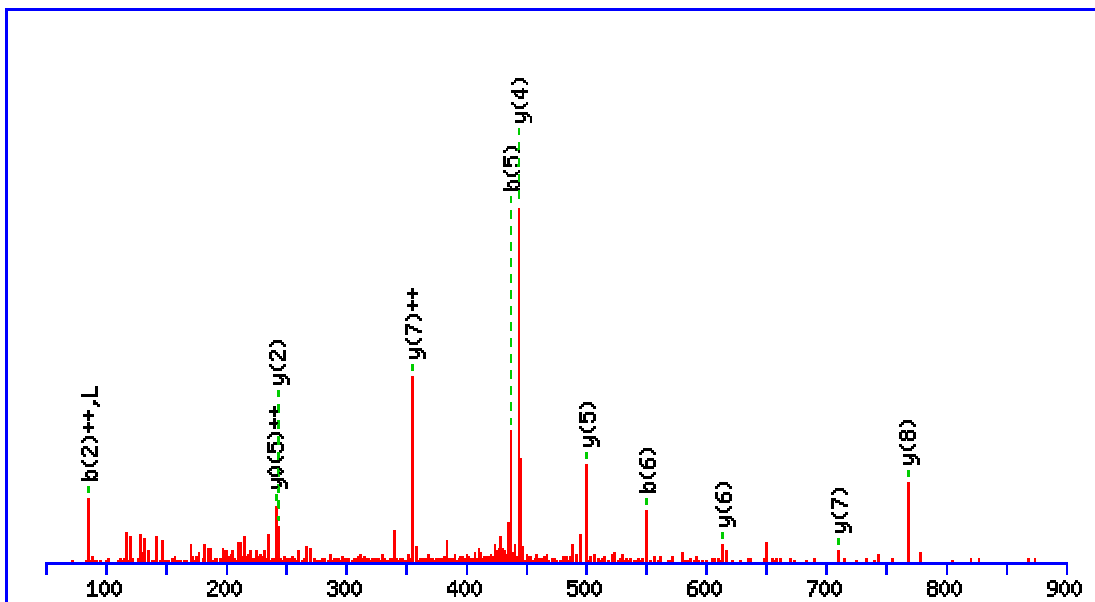

Monoisotopic mass of neutral peptide  $M_r(\text{calc})$ : 880.5382

Fixed modifications: Carbamidomethyl (C)

Ions Score: 44 Expect: 0.0024

Matches (**Bold Red**): 14/73 fragment ions using 18 most intense peaks

| # | Immon.         | b               | b <sup>++</sup> | b <sup>0</sup> | b <sup>0++</sup> | Seq. | y               | y <sup>++</sup> | y <sup>*</sup> | y <sup>*++</sup> | y <sup>0</sup> | y <sup>0++</sup> | # |
|---|----------------|-----------------|-----------------|----------------|------------------|------|-----------------|-----------------|----------------|------------------|----------------|------------------|---|
| 1 | <b>86.0964</b> | 114.0913        | 57.5493         |                |                  | I    |                 |                 |                |                  |                |                  | 9 |
| 2 | 30.0338        | 171.1128        | <b>86.0600</b>  |                |                  | G    | <b>768.4614</b> | 384.7343        | 751.4349       | 376.2211         | 750.4509       | 375.7291         | 8 |
| 3 | 70.0651        | 268.1656        | 134.5864        |                |                  | P    | <b>711.4400</b> | <b>356.2236</b> | 694.4134       | 347.7103         | 693.4294       | 347.2183         | 7 |
| 4 | <b>86.0964</b> | 381.2496        | 191.1285        |                |                  | L    | <b>614.3872</b> | 307.6972        | 597.3606       | 299.1840         | 596.3766       | 298.6919         | 6 |
| 5 | 30.0338        | <b>438.2711</b> | 219.6392        |                |                  | G    | <b>501.3031</b> | 251.1552        | 484.2766       | 242.6419         | 483.2926       | <b>242.1499</b>  | 5 |
| 6 | <b>86.0964</b> | <b>551.3552</b> | 276.1812        |                |                  | L    | <b>444.2817</b> | 222.6445        | 427.2551       | 214.1312         | 426.2711       | 213.6392         | 4 |
| 7 | 60.0444        | 638.3872        | 319.6972        | 620.3766       | 310.6919         | S    | 331.1976        | 166.1024        | 314.1710       | 157.5892         | 313.1870       | 157.0972         | 3 |
| 8 | 70.0651        | 735.4400        | 368.2236        | 717.4294       | 359.2183         | P    | <b>244.1656</b> | 122.5864        | 227.1390       | 114.0731         |                |                  | 2 |
| 9 | 101.1073       |                 |                 |                |                  | K    | 147.1128        | 74.0600         | 130.0863       | 65.5468          |                |                  | 1 |

MS/MS Fragmentation of **SLQSVAEER**

Found in **P61313**, P61313|RL15\_HUMAN 60S ribosomal protein L15 OS=Homo sapiens GN=RPL15 PE=1 SV=2

Match to Query 359: 1017.503392 from(509.758972,2,+)

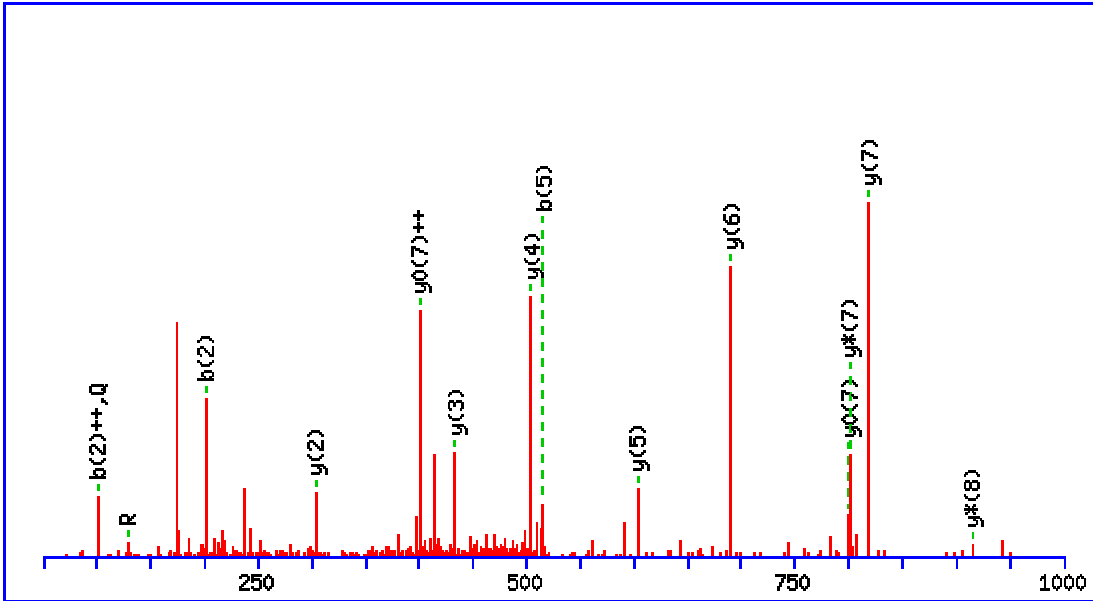

Monoisotopic mass of neutral peptide  $M_r(\text{calc})$ : 1017.5091

Fixed modifications: Carbamidomethyl (C)

Ions Score: 47 Expect: 0.0016

Matches (**Bold Red**): 15/99 fragment ions using 27 most intense peaks

| # | Immon.          | b               | b <sup>++</sup> | b <sup>*</sup> | b <sup>*++</sup> | b <sup>0</sup> | b <sup>0++</sup> | Seq. | y               | y <sup>++</sup> | y <sup>*</sup>  | y <sup>*++</sup> | y <sup>0</sup>  | y <sup>0++</sup> | # |
|---|-----------------|-----------------|-----------------|----------------|------------------|----------------|------------------|------|-----------------|-----------------|-----------------|------------------|-----------------|------------------|---|
| 1 | 60.0444         | 88.0393         | 44.5233         |                |                  | 70.0287        | 35.5180          | S    |                 |                 |                 |                  |                 |                  | 9 |
| 2 | 86.0964         | <b>201.1234</b> | <b>101.0653</b> |                |                  | 183.1128       | 92.0600          | L    | 931.4843        | 466.2458        | <b>914.4578</b> | 457.7325         | 913.4738        | 457.2405         | 8 |
| 3 | <b>101.0709</b> | 329.1819        | 165.0946        | 312.1554       | 156.5813         | 311.1714       | 156.0893         | Q    | <b>818.4003</b> | 409.7038        | <b>801.3737</b> | 401.1905         | <b>800.3897</b> | <b>400.6985</b>  | 7 |
| 4 | 60.0444         | 416.2140        | 208.6106        | 399.1874       | 200.0974         | 398.2034       | 199.6053         | S    | <b>690.3417</b> | 345.6745        | 673.3151        | 337.1612         | 672.3311        | 336.6692         | 6 |
| 5 | 72.0808         | <b>515.2824</b> | 258.1448        | 498.2558       | 249.6316         | 497.2718       | 249.1395         | V    | <b>603.3097</b> | 302.1585        | 586.2831        | 293.6452         | 585.2991        | 293.1532         | 5 |
| 6 | 44.0495         | 586.3195        | 293.6634        | 569.2930       | 285.1501         | 568.3089       | 284.6581         | A    | <b>504.2413</b> | 252.6243        | 487.2147        | 244.1110         | 486.2307        | 243.6190         | 4 |
| 7 | 102.0550        | 715.3621        | 358.1847        | 698.3355       | 349.6714         | 697.3515       | 349.1794         | E    | <b>433.2041</b> | 217.1057        | 416.1776        | 208.5924         | 415.1936        | 208.1004         | 3 |
| 8 | 102.0550        | 844.4047        | 422.7060        | 827.3781       | 414.1927         | 826.3941       | 413.7007         | E    | <b>304.1615</b> | 152.5844        | 287.1350        | 144.0711         | 286.1510        | 143.5791         | 2 |
| 9 | <b>129.1135</b> |                 |                 |                |                  |                |                  | R    | 175.1190        | 88.0631         | 158.0924        | 79.5498          |                 |                  | 1 |

MS/MS Fragmentation of **TGAAPHIDVVR**

Found in **P46776**, P46776|RL27A\_HUMAN 60S ribosomal protein L27a OS=Homo sapiens GN=RPL27A PE=1 SV=2

Match to Query 416: 1110.638054 from(556.326303,2+)

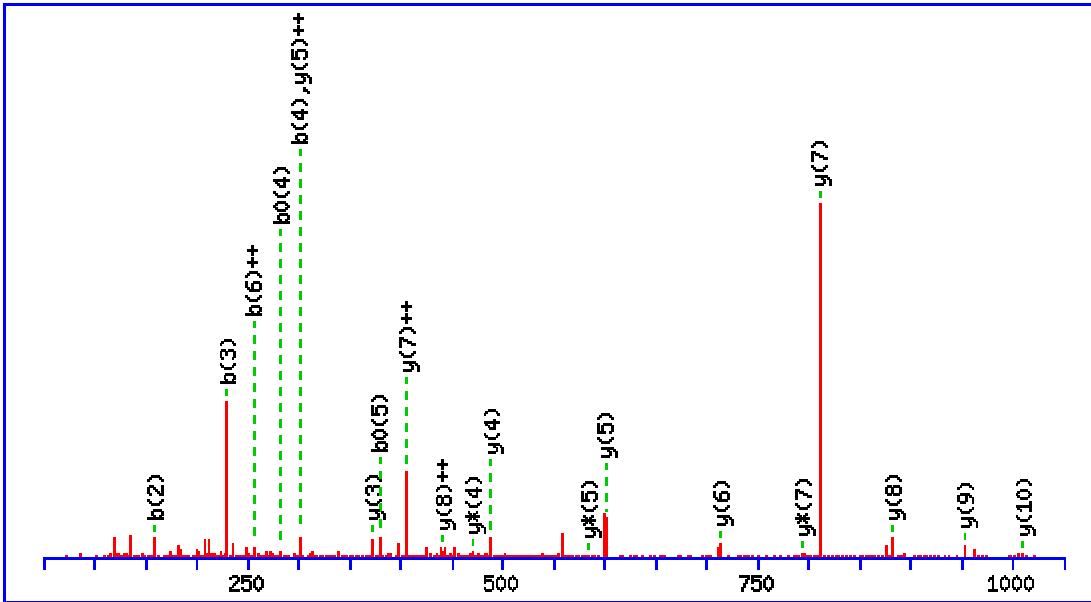

Monoisotopic mass of neutral peptide Mr(calc): 1110.6397

Fixed modifications: Carbamidomethyl (C)

Ions Score: 57 Expect: 0.00015

Matches (Bold Red): 20/105 fragment ions using 41 most intense peaks

| #  | Immon.   | b               | b <sup>++</sup> | b <sup>0</sup>  | b <sup>0++</sup> | Seq. | y                | y <sup>++</sup> | y*              | y <sup>*++</sup> | y <sup>0</sup> | y <sup>0++</sup> | #  |
|----|----------|-----------------|-----------------|-----------------|------------------|------|------------------|-----------------|-----------------|------------------|----------------|------------------|----|
| 1  | 74.0600  | 102.0550        | 51.5311         | 84.0444         | 42.5258          | T    |                  |                 |                 |                  |                |                  | 11 |
| 2  | 30.0338  | <b>159.0764</b> | 80.0418         | 141.0659        | 71.0366          | G    | <b>1010.5993</b> | 505.8033        | 993.5728        | 497.2900         | 992.5887       | 496.7980         | 10 |
| 3  | 44.0495  | <b>230.1135</b> | 115.5604        | 212.1030        | 106.5551         | A    | <b>953.5778</b>  | 477.2926        | 936.5513        | 468.7793         | 935.5673       | 468.2873         | 9  |
| 4  | 44.0495  | <b>301.1506</b> | 151.0790        | <b>283.1401</b> | 142.0737         | A    | <b>882.5407</b>  | <b>441.7740</b> | 865.5142        | 433.2607         | 864.5302       | 432.7687         | 8  |
| 5  | 70.0651  | 398.2034        | 199.6053        | <b>380.1928</b> | 190.6001         | P    | <b>811.5036</b>  | <b>406.2554</b> | <b>794.4771</b> | 397.7422         | 793.4930       | 397.2502         | 7  |
| 6  | 86.0964  | 511.2875        | <b>256.1474</b> | 493.2769        | 247.1421         | I    | <b>714.4509</b>  | 357.7291        | 697.4243        | 349.2158         | 696.4403       | 348.7238         | 6  |
| 7  | 86.0964  | 624.3715        | 312.6894        | 606.3610        | 303.6841         | I    | <b>601.3668</b>  | <b>301.1870</b> | <b>584.3402</b> | 292.6738         | 583.3562       | 292.1817         | 5  |
| 8  | 88.0393  | 739.3985        | 370.2029        | 721.3879        | 361.1976         | D    | <b>488.2827</b>  | 244.6450        | <b>471.2562</b> | 236.1317         | 470.2722       | 235.6397         | 4  |
| 9  | 72.0808  | 838.4669        | 419.7371        | 820.4563        | 410.7318         | V    | <b>373.2558</b>  | 187.1315        | 356.2292        | 178.6183         |                |                  | 3  |
| 10 | 72.0808  | 937.5353        | 469.2713        | 919.5247        | 460.2660         | V    | 274.1874         | 137.5973        | 257.1608        | 129.0840         |                |                  | 2  |
| 11 | 129.1135 |                 |                 |                 |                  | R    | 175.1190         | 88.0631         | 158.0924        | 79.5498          |                |                  | 1  |

MS/MS Fragmentation of **TDAAVSFAK**

Found in **P05141**, P05141|ADT2\_HUMAN ADP/ATP translocase 2 OS=Homo sapiens GN=SLC25A5 PE=1 SV=6

Match to Query 166: 950.537758 from(476.276155,2+)

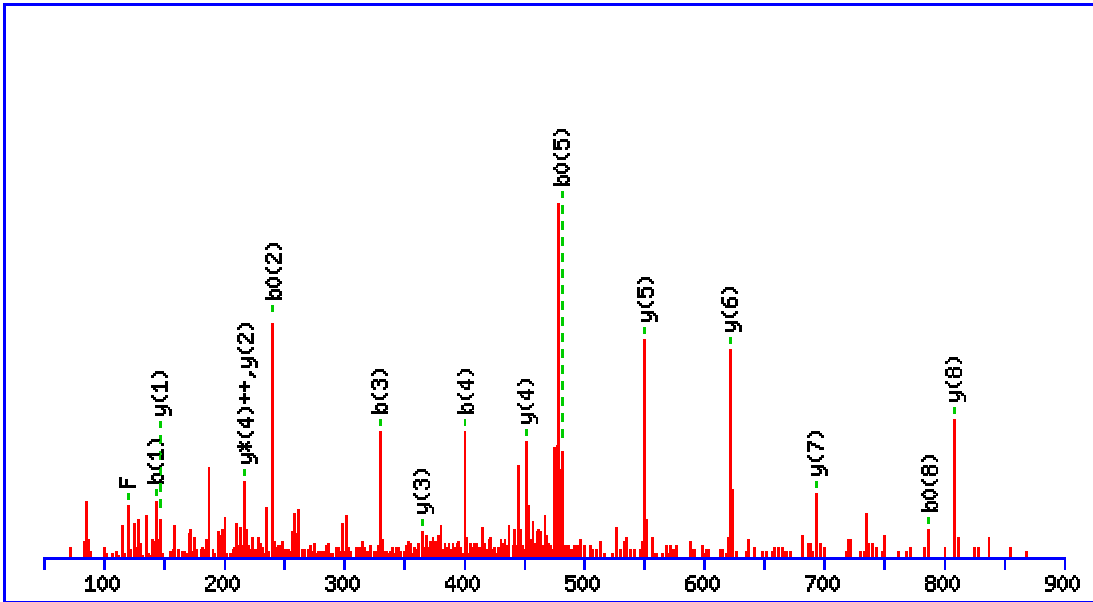

Monoisotopic mass of neutral peptide Mr(calc): 950.4709

Fixed modifications: Carbamidomethyl (C)

Variable modifications:

N-term : Acetyl (Protein N-term)

Ions Score: 47 Expect: 0.0013

Matches (Bold Red): 16/83 fragment ions using 46 most intense peaks

| # | Immon.          | b               | b <sup>++</sup> | b <sup>0</sup>  | b <sup>0++</sup> | Seq. | y               | y <sup>++</sup> | y*       | y <sup>*++</sup> | y <sup>0</sup> | y <sup>0++</sup> | # |
|---|-----------------|-----------------|-----------------|-----------------|------------------|------|-----------------|-----------------|----------|------------------|----------------|------------------|---|
| 1 | 74.0600         | <b>144.0655</b> | 72.5364         | 126.0549        | 63.5311          | T    |                 |                 |          |                  |                |                  | 9 |
| 2 | 88.0393         | 259.0925        | 130.0499        | <b>241.0819</b> | 121.0446         | D    | <b>808.4199</b> | 404.7136        | 791.3934 | 396.2003         | 790.4094       | 395.7083         | 8 |
| 3 | 44.0495         | <b>330.1296</b> | 165.5684        | 312.1190        | 156.5631         | A    | <b>693.3930</b> | 347.2001        | 676.3665 | 338.6869         | 675.3824       | 338.1949         | 7 |
| 4 | 44.0495         | <b>401.1667</b> | 201.0870        | 383.1561        | 192.0817         | A    | <b>622.3559</b> | 311.6816        | 605.3293 | 303.1683         | 604.3453       | 302.6763         | 6 |
| 5 | 72.0808         | 500.2351        | 250.6212        | <b>482.2245</b> | 241.6159         | V    | <b>551.3188</b> | 276.1630        | 534.2922 | 267.6498         | 533.3082       | 267.1577         | 5 |
| 6 | 60.0444         | 587.2671        | 294.1372        | 569.2566        | 285.1319         | S    | <b>452.2504</b> | 226.6288        | 435.2238 | <b>218.1155</b>  | 434.2398       | 217.6235         | 4 |
| 7 | <b>120.0808</b> | 734.3355        | 367.6714        | 716.3250        | 358.6661         | F    | <b>365.2183</b> | 183.1128        | 348.1918 | 174.5995         |                |                  | 3 |
| 8 | 44.0495         | 805.3727        | 403.1900        | <b>787.3621</b> | 394.1847         | A    | <b>218.1499</b> | 109.5786        | 201.1234 | 101.0653         |                |                  | 2 |
| 9 | 101.1073        |                 |                 |                 |                  | K    | <b>147.1128</b> | 74.0600         | 130.0863 | 65.5468          |                |                  | 1 |

MS/MS Fragmentation of **MTVTDQVNCPK**

Found in **P05090**, P05090|APOD\_HUMAN Apolipoprotein D OS=Homo sapiens GN=APOD PE=1 SV=1

Match to Query 446: 1307.673980 from(654.844266,2+)

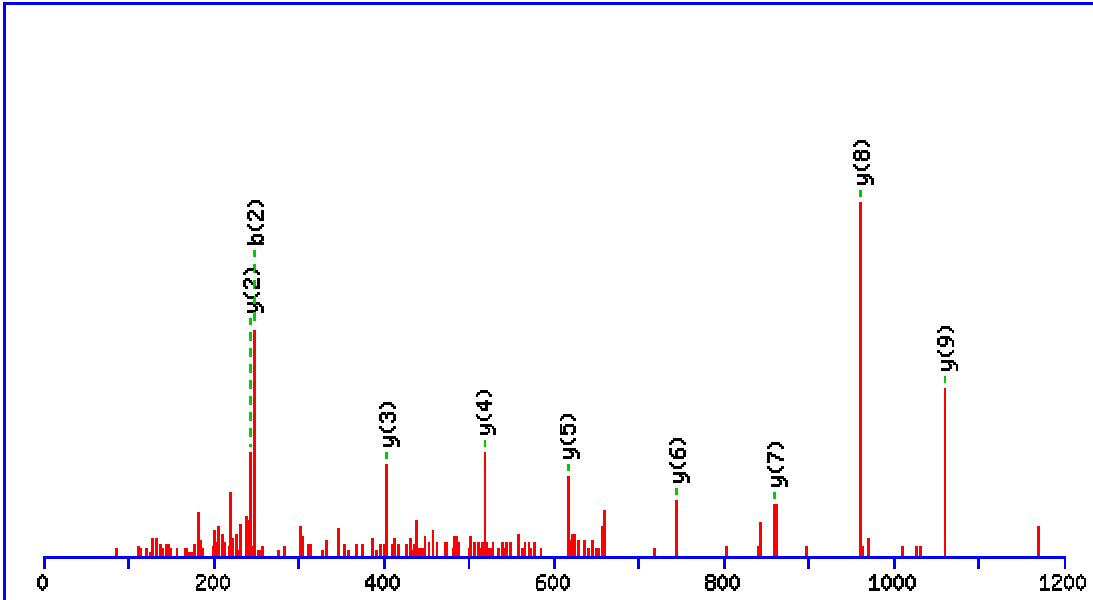

Monoisotopic mass of neutral peptide Mr(calc): 1307.5850

Fixed modifications: Carbamidomethyl (C)

Variable modifications:

M1 : Oxidation (M), with neutral losses 0.0000(shown in table), 63.9983

Ions Score: 55 Expect: 0.00024

Matches (Bold Red): 9/156 fragment ions using 14 most intense peaks

| #  | Immon.   | b               | b <sup>+</sup> | b*        | b <sup>+</sup> * | b <sup>0</sup> | b <sup>+</sup> * | Seq. | y                | y <sup>+</sup> | y*        | y <sup>+</sup> * | y <sup>0</sup> | y <sup>+</sup> 0 | #  |
|----|----------|-----------------|----------------|-----------|------------------|----------------|------------------|------|------------------|----------------|-----------|------------------|----------------|------------------|----|
| 1  | 120.0478 | 148.0427        | 74.5250        |           |                  |                |                  | M    |                  |                |           |                  |                |                  | 11 |
| 2  | 74.0600  | <b>249.0904</b> | 125.0488       |           |                  | 231.0798       | 116.0435         | T    | 1161.5569        | 581.2821       | 1144.5303 | 572.7688         | 1143.5463      | 572.2768         | 10 |
| 3  | 72.0808  | 348.1588        | 174.5830       |           |                  | 330.1482       | 165.5777         | V    | <b>1060.5092</b> | 530.7582       | 1043.4826 | 522.2449         | 1042.4986      | 521.7529         | 9  |
| 4  | 74.0600  | 449.2065        | 225.1069       |           |                  | 431.1959       | 216.1016         | T    | <b>961.4408</b>  | 481.2240       | 944.4142  | 472.7107         | 943.4302       | 472.2187         | 8  |
| 5  | 88.0393  | 564.2334        | 282.6203       |           |                  | 546.2228       | 273.6151         | D    | <b>860.3931</b>  | 430.7002       | 843.3665  | 422.1869         | 842.3825       | 421.6949         | 7  |
| 6  | 101.0709 | 692.2920        | 346.6496       | 675.2654  | 338.1364         | 674.2814       | 337.6443         | Q    | <b>745.3661</b>  | 373.1867       | 728.3396  | 364.6734         |                |                  | 6  |
| 7  | 72.0808  | 791.3604        | 396.1838       | 774.3338  | 387.6706         | 773.3498       | 387.1785         | V    | <b>617.3076</b>  | 309.1574       | 600.2810  | 300.6441         |                |                  | 5  |
| 8  | 87.0553  | 905.4033        | 453.2053       | 888.3768  | 444.6920         | 887.3927       | 444.2000         | N    | <b>518.2391</b>  | 259.6232       | 501.2126  | 251.1099         |                |                  | 4  |
| 9  | 133.0430 | 1065.4340       | 533.2206       | 1048.4074 | 524.7073         | 1047.4234      | 524.2153         | C    | <b>404.1962</b>  | 202.6017       | 387.1697  | 194.0885         |                |                  | 3  |
| 10 | 70.0651  | 1162.4867       | 581.7470       | 1145.4602 | 573.2337         | 1144.4762      | 572.7417         | P    | <b>244.1656</b>  | 122.5864       | 227.1390  | 114.0731         |                |                  | 2  |
| 11 | 101.1073 |                 |                |           |                  |                |                  | K    | 147.1128         | 74.0600        | 130.0863  | 65.5468          |                |                  | 1  |

MS/MS Fragmentation of **AVLEQEETAASR**

Found in **Q9Y2J2**, Q9Y2J2|E41L3\_HUMAN Band 4.1-like protein 3 OS=Homo sapiens GN=EPB41L3 PE=1 SV=2

Match to Query 396: 1373.657264 from(687.835908,2+)

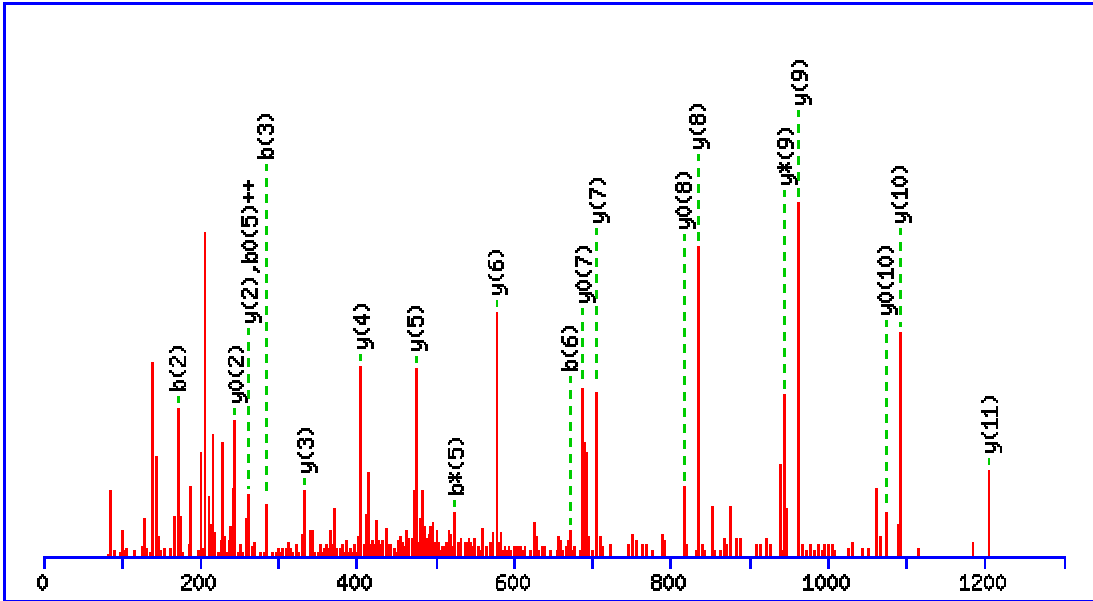

Monoisotopic mass of neutral peptide **Mr(calc)**: 1373.6786

Fixed modifications: Carbamidomethyl (C)

Ions Score: 75 Expect: 2.1e-006

Matches (**Bold Red**): 20/141 fragment ions using 26 most intense peaks

| #  | Immon.   | b               | b <sup>++</sup> | b*              | b <sup>*++</sup> | b <sup>0</sup> | b <sup>0++</sup> | Seq. | y                | y <sup>++</sup> | y*              | y <sup>*++</sup> | y <sup>0</sup>   | y <sup>0++</sup> | #  |
|----|----------|-----------------|-----------------|-----------------|------------------|----------------|------------------|------|------------------|-----------------|-----------------|------------------|------------------|------------------|----|
| 1  | 44.0495  | 72.0444         | 36.5258         |                 |                  |                |                  | A    |                  |                 |                 |                  |                  |                  | 13 |
| 2  | 72.0808  | <b>171.1128</b> | 86.0600         |                 |                  |                |                  | V    | 1303.6488        | 652.3281        | 1286.6223       | 643.8148         | 1285.6383        | 643.3228         | 12 |
| 3  | 86.0964  | <b>284.1969</b> | 142.6021        |                 |                  |                |                  | L    | <b>1204.5804</b> | 602.7938        | 1187.5539       | 594.2806         | 1186.5699        | 593.7886         | 11 |
| 4  | 102.0550 | 413.2395        | 207.1234        |                 |                  | 395.2289       | 198.1181         | E    | <b>1091.4964</b> | 546.2518        | 1074.4698       | 537.7385         | <b>1073.4858</b> | 537.2465         | 10 |
| 5  | 101.0709 | 541.2980        | 271.1527        | <b>524.2715</b> | 262.6394         | 523.2875       | <b>262.1474</b>  | Q    | <b>962.4538</b>  | 481.7305        | <b>945.4272</b> | 473.2172         | 944.4432         | 472.7252         | 9  |
| 6  | 102.0550 | <b>670.3406</b> | 335.6740        | 653.3141        | 327.1607         | 652.3301       | 326.6687         | E    | <b>834.3952</b>  | 417.7012        | 817.3686        | 409.1880         | <b>816.3846</b>  | 408.6959         | 8  |
| 7  | 102.0550 | 799.3832        | 400.1953        | 782.3567        | 391.6820         | 781.3727       | 391.1900         | E    | <b>705.3526</b>  | 353.1799        | 688.3260        | 344.6667         | <b>687.3420</b>  | 344.1747         | 7  |
| 8  | 74.0600  | 900.4309        | 450.7191        | 883.4044        | 442.2058         | 882.4203       | 441.7138         | T    | <b>576.3100</b>  | 288.6586        | 559.2835        | 280.1454         | 558.2994         | 279.6534         | 6  |
| 9  | 44.0495  | 971.4680        | 486.2376        | 954.4415        | 477.7244         | 953.4575       | 477.2324         | A    | <b>475.2623</b>  | 238.1348        | 458.2358        | 229.6215         | 457.2518         | 229.1295         | 5  |
| 10 | 44.0495  | 1042.5051       | 521.7562        | 1025.4786       | 513.2429         | 1024.4946      | 512.7509         | A    | <b>404.2252</b>  | 202.6162        | 387.1987        | 194.1030         | 386.2146         | 193.6110         | 4  |
| 11 | 44.0495  | 1113.5422       | 557.2748        | 1096.5157       | 548.7615         | 1095.5317      | 548.2695         | A    | <b>333.1881</b>  | 167.0977        | 316.1615        | 158.5844         | 315.1775         | 158.0924         | 3  |
| 12 | 60.0444  | 1200.5743       | 600.7908        | 1183.5477       | 592.2775         | 1182.5637      | 591.7855         | S    | <b>262.1510</b>  | 131.5791        | 245.1244        | 123.0659         | <b>244.1404</b>  | 122.5738         | 2  |
| 13 | 129.1135 |                 |                 |                 |                  |                |                  | R    | 175.1190         | 88.0631         | 158.0924        | 79.5498          |                  |                  | 1  |



MS/MS Fragmentation of **VNHVTLSPK**

Found in **P61769**, P61769|B2MG\_HUMAN Beta-2-microglobulin OS=Homo sapiens GN=B2M PE=1 SV=1

Match to Query 292: 1121.530833 from(374.850887,3+)

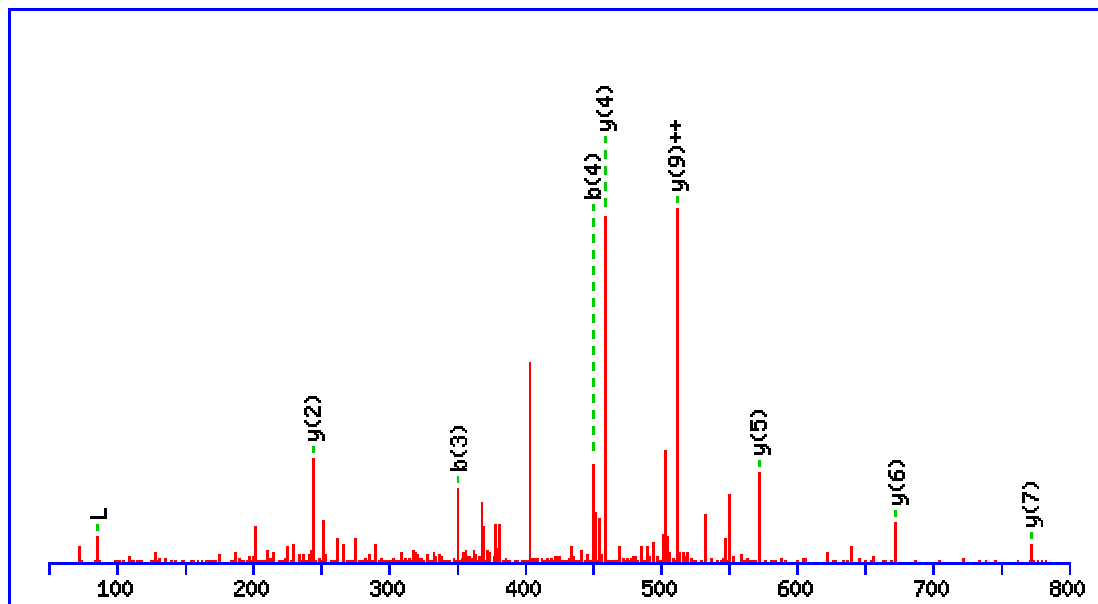

Monoisotopic mass of neutral peptide Mr(calc): 1121.6193

Fixed modifications: Carbamidomethyl (C)

Ions Score: 39 Expect: 0.0086

Matches (Bold Red): 9/102 fragment ions using 11 most intense peaks

| #  | Immon.         | b               | b <sup>++</sup> | b*       | b <sup>+++</sup> | b <sup>0</sup> | b <sup>0++</sup> | Seq. | y               | y <sup>++</sup> | y*        | y <sup>+++</sup> | y <sup>0</sup> | y <sup>0++</sup> | #  |
|----|----------------|-----------------|-----------------|----------|------------------|----------------|------------------|------|-----------------|-----------------|-----------|------------------|----------------|------------------|----|
| 1  | 72.0808        | 100.0757        | 50.5415         |          |                  |                |                  | V    |                 |                 |           |                  |                |                  | 10 |
| 2  | 87.0553        | 214.1186        | 107.5629        | 197.0921 | 99.0497          |                |                  | N    | 1023.5582       | <b>512.2827</b> | 1006.5316 | 503.7694         | 1005.5476      | 503.2774         | 9  |
| 3  | 110.0713       | <b>351.1775</b> | 176.0924        | 334.1510 | 167.5791         |                |                  | H    | 909.5152        | 455.2613        | 892.4887  | 446.7480         | 891.5047       | 446.2560         | 8  |
| 4  | 72.0808        | <b>450.2459</b> | 225.6266        | 433.2194 | 217.1133         |                |                  | V    | <b>772.4563</b> | 386.7318        | 755.4298  | 378.2185         | 754.4458       | 377.7265         | 7  |
| 5  | 74.0600        | 551.2936        | 276.1504        | 534.2671 | 267.6372         | 533.2831       | 267.1452         | T    | <b>673.3879</b> | 337.1976        | 656.3614  | 328.6843         | 655.3774       | 328.1923         | 6  |
| 6  | <b>86.0964</b> | 664.3777        | 332.6925        | 647.3511 | 324.1792         | 646.3671       | 323.6872         | L    | <b>572.3402</b> | 286.6738        | 555.3137  | 278.1605         | 554.3297       | 277.6685         | 5  |
| 7  | 60.0444        | 751.4097        | 376.2085        | 734.3832 | 367.6952         | 733.3991       | 367.2032         | S    | <b>459.2562</b> | 230.1317        | 442.2296  | 221.6185         | 441.2456       | 221.1264         | 4  |
| 8  | 101.0709       | 879.4683        | 440.2378        | 862.4417 | 431.7245         | 861.4577       | 431.2325         | Q    | 372.2241        | 186.6157        | 355.1976  | 178.1024         |                |                  | 3  |
| 9  | 70.0651        | 976.5211        | 488.7642        | 959.4945 | 480.2509         | 958.5105       | 479.7589         | P    | <b>244.1656</b> | 122.5864        | 227.1390  | 114.0731         |                |                  | 2  |
| 10 | 101.1073       |                 |                 |          |                  |                |                  | K    | 147.1128        | 74.0600         | 130.0863  | 65.5468          |                |                  | 1  |

MS/MS Fragmentation of **LQDASAEVER**

Found in **Q10589**, Q10589|BST2\_HUMAN Bone marrow stromal antigen 2 OS=Homo sapiens GN=BST2 PE=1 SV=1

Match to Query 395: 1116.507912 from(559.261232,2+)

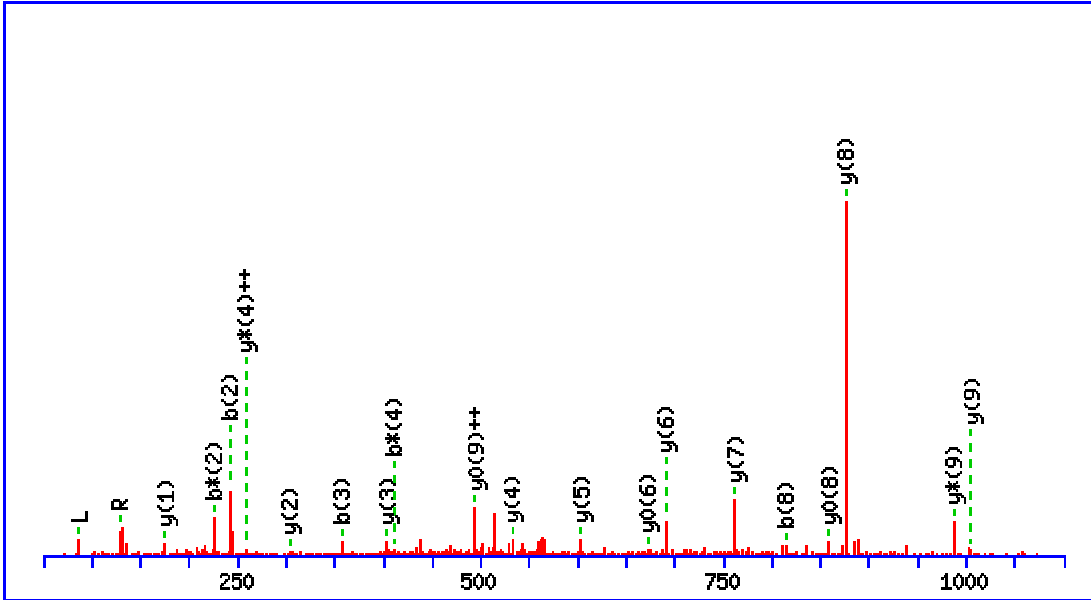

Monoisotopic mass of neutral peptide  $M_r(\text{calc})$ : 1116.5411

Fixed modifications: Carbamidomethyl (C)

Ions Score: 49 Expect: 0.0011

Matches (**Bold Red**): 22/110 fragment ions using 59 most intense peaks

| #  | Immon.          | b               | b <sup>++</sup> | b*              | b <sup>+++</sup> | b <sup>0</sup> | b <sup>0++</sup> | Seq. | y                | y <sup>++</sup> | y*              | y <sup>+++</sup> | y <sup>0</sup>  | y <sup>0++</sup> | #  |
|----|-----------------|-----------------|-----------------|-----------------|------------------|----------------|------------------|------|------------------|-----------------|-----------------|------------------|-----------------|------------------|----|
| 1  | <b>86.0964</b>  | 114.0913        | 57.5493         |                 |                  |                |                  | L    |                  |                 |                 |                  |                 |                  | 10 |
| 2  | 101.0709        | <b>242.1499</b> | 121.5786        | <b>225.1234</b> | 113.0653         |                |                  | Q    | <b>1004.4643</b> | 502.7358        | <b>987.4378</b> | 494.2225         | 986.4538        | <b>493.7305</b>  | 9  |
| 3  | 88.0393         | <b>357.1769</b> | 179.0921        | 340.1503        | 170.5788         | 339.1663       | 170.0868         | D    | <b>876.4058</b>  | 438.7065        | 859.3792        | 430.1932         | <b>858.3952</b> | 429.7012         | 8  |
| 4  | 44.0495         | 428.2140        | 214.6106        | <b>411.1874</b> | 206.0974         | 410.2034       | 205.6053         | A    | <b>761.3788</b>  | 381.1930        | 744.3523        | 372.6798         | 743.3682        | 372.1878         | 7  |
| 5  | 60.0444         | 515.2460        | <b>258.1266</b> | 498.2195        | 249.6134         | 497.2354       | 249.1214         | S    | <b>690.3417</b>  | 345.6745        | 673.3151        | 337.1612         | <b>672.3311</b> | 336.6692         | 6  |
| 6  | 44.0495         | 586.2831        | 293.6452        | 569.2566        | 285.1319         | 568.2726       | 284.6399         | A    | <b>603.3097</b>  | 302.1585        | 586.2831        | 293.6452         | 585.2991        | 293.1532         | 5  |
| 7  | 102.0550        | 715.3257        | 358.1665        | 698.2992        | 349.6532         | 697.3151       | 349.1612         | E    | <b>532.2726</b>  | 266.6399        | 515.2460        | <b>258.1266</b>  | 514.2620        | 257.6346         | 4  |
| 8  | 72.0808         | <b>814.3941</b> | 407.7007        | 797.3676        | 399.1874         | 796.3836       | 398.6954         | V    | <b>403.2300</b>  | 202.1186        | 386.2034        | 193.6053         | 385.2194        | 193.1133         | 3  |
| 9  | 102.0550        | 943.4367        | 472.2220        | 926.4102        | 463.7087         | 925.4262       | 463.2167         | E    | <b>304.1615</b>  | 152.5844        | 287.1350        | 144.0711         | 286.1510        | 143.5791         | 2  |
| 10 | <b>129.1135</b> |                 |                 |                 |                  |                |                  | R    | <b>175.1190</b>  | 88.0631         | 158.0924        | 79.5498          |                 |                  | 1  |

MS/MS Fragmentation of **EIMLAAK**

Found in **P10606**, P10606|COX5B\_HUMAN Cytochrome c oxidase subunit 5B, mitochondrial OS=Homo sapiens GN=COX5B PE=1 SV=2

Match to Query 38: 790.330084 from(396.172318,2,+)

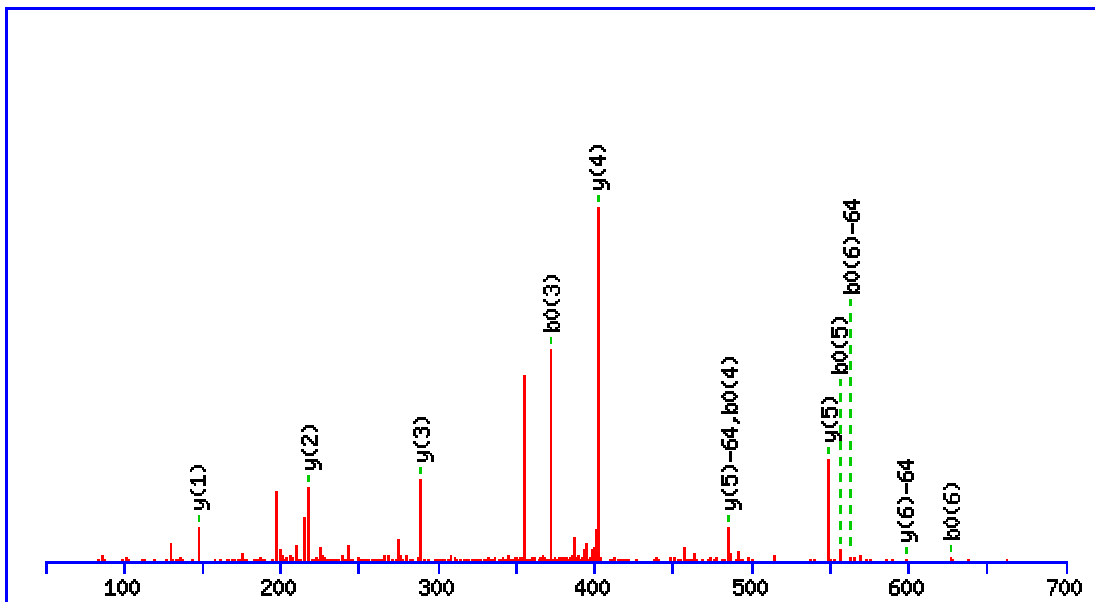

**Monoisotopic mass of neutral peptide Mr(calc):** 790.4258

**Fixed modifications:** Carbamidomethyl (C)

**Variable modifications:**

**M3** : Oxidation (M), with neutral losses 63.9983(shown in table), 0.0000

**Ions Score:** 40 **Expect:** 0.0094

**Matches (Bold Red):** 12/80 fragment ions using 21 most intense peaks

| # | Immon.   | b        | b <sup>++</sup> | b <sup>0</sup>  | b <sup>0++</sup> | Seq. | y               | y <sup>++</sup> | y <sup>*</sup> | y <sup>*++</sup> | # |
|---|----------|----------|-----------------|-----------------|------------------|------|-----------------|-----------------|----------------|------------------|---|
| 1 | 102.0550 | 130.0499 | 65.5286         | 112.0393        | 56.5233          | E    |                 |                 |                |                  | 7 |
| 2 | 86.0964  | 243.1339 | 122.0706        | 225.1234        | 113.0653         | I    | <b>598.3923</b> | 299.6998        | 581.3657       | 291.1865         | 6 |
| 3 | 56.0495  | 326.1711 | 163.5892        | 308.1605        | 154.5839         | M    | <b>485.3082</b> | 243.1577        | 468.2817       | 234.6445         | 5 |
| 4 | 86.0964  | 439.2551 | 220.1312        | 421.2446        | 211.1259         | L    | <b>402.2711</b> | 201.6392        | 385.2445       | 193.1259         | 4 |
| 5 | 44.0495  | 510.2922 | 255.6498        | 492.2817        | 246.6445         | A    | <b>289.1870</b> | 145.0972        | 272.1605       | 136.5839         | 3 |
| 6 | 44.0495  | 581.3293 | 291.1683        | <b>563.3188</b> | 282.1630         | A    | <b>218.1499</b> | 109.5786        | 201.1234       | 101.0653         | 2 |
| 7 | 101.1073 |          |                 |                 |                  | K    | <b>147.1128</b> | 74.0600         | 130.0863       | 65.5468          | 1 |

MS/MS Fragmentation of **GSPNANEPLLVFGK**

Found in **P28838**, P28838|AMPL\_HUMAN Cytosol aminopeptidase OS=Homo sapiens GN=LAP3 PE=1 SV=3

Match to Query 420: 1524.755510 from(763.385031,2+)

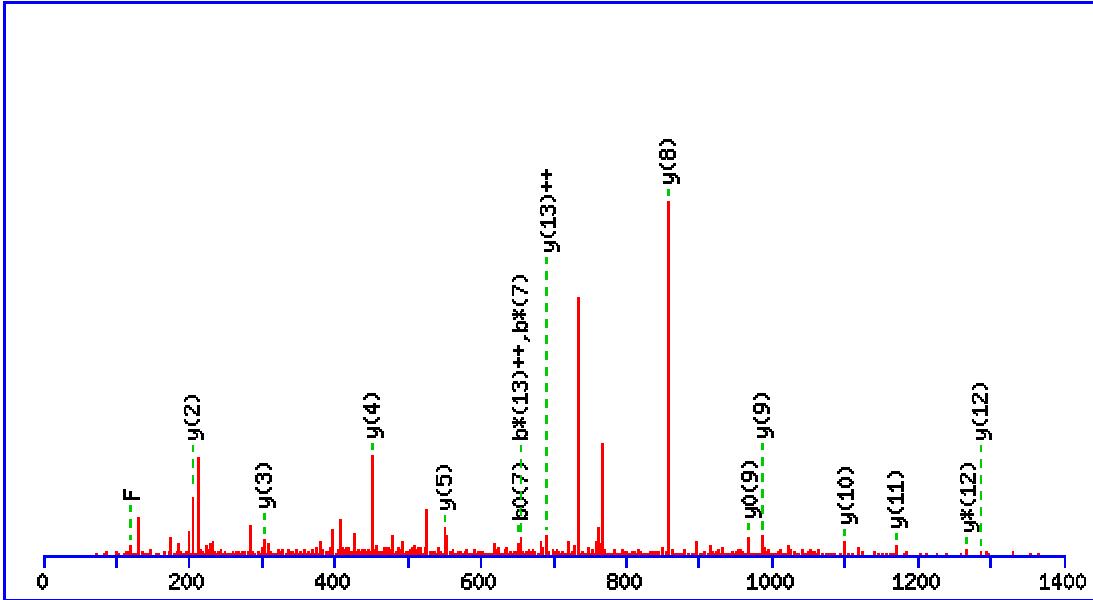

Monoisotopic mass of neutral peptide Mr(calc): 1524.7936

Fixed modifications: Carbamidomethyl (C)

Ions Score: 52 Expect: 0.00047

Matches (Bold Red): 16/159 fragment ions using 30 most intense peaks

| #  | Immon.          | b         | b <sup>+</sup> | b*              | b <sup>++</sup> | b <sup>0</sup>  | b <sup>++</sup> | Seq. | y                | y <sup>+</sup>  | y*               | y <sup>++</sup> | y <sup>0</sup>  | y <sup>0++</sup> | #  |
|----|-----------------|-----------|----------------|-----------------|-----------------|-----------------|-----------------|------|------------------|-----------------|------------------|-----------------|-----------------|------------------|----|
| 1  | 30.0338         | 58.0287   | 29.5180        |                 |                 |                 |                 | G    |                  |                 |                  |                 |                 |                  | 15 |
| 2  | 60.0444         | 145.0608  | 73.0340        |                 |                 | 127.0502        | 64.0287         | S    | 1468.7795        | 734.8934        | 1451.7529        | 726.3801        | 1450.7689       | 725.8881         | 14 |
| 3  | 70.0651         | 242.1135  | 121.5604       |                 |                 | 224.1030        | 112.5551        | P    | 1381.7474        | <b>691.3774</b> | 1364.7209        | 682.8641        | 1363.7369       | 682.3721         | 13 |
| 4  | 87.0553         | 356.1565  | 178.5819       | 339.1299        | 170.0686        | 338.1459        | 169.5766        | N    | <b>1284.6947</b> | 642.8510        | <b>1267.6681</b> | 634.3377        | 1266.6841       | 633.8457         | 12 |
| 5  | 44.0495         | 427.1936  | 214.1004       | 410.1670        | 205.5871        | 409.1830        | 205.0951        | A    | <b>1170.6517</b> | 585.8295        | 1153.6252        | 577.3162        | 1152.6412       | 576.8242         | 11 |
| 6  | 87.0553         | 541.2365  | 271.1219       | 524.2100        | 262.6086        | 523.2259        | 262.1166        | N    | <b>1099.6146</b> | 550.3109        | 1082.5881        | 541.7977        | 1081.6041       | 541.3057         | 10 |
| 7  | 102.0550        | 670.2791  | 335.6432       | <b>653.2525</b> | 327.1299        | <b>652.2685</b> | 326.6379        | E    | <b>985.5717</b>  | 493.2895        | 968.5451         | 484.7762        | <b>967.5611</b> | 484.2842         | 9  |
| 8  | 70.0651         | 767.3319  | 384.1696       | 750.3053        | 375.6563        | 749.3213        | 375.1643        | P    | <b>856.5291</b>  | 428.7682        | 839.5026         | 420.2549        |                 |                  | 8  |
| 9  | 70.0651         | 864.3846  | 432.6959       | 847.3581        | 424.1827        | 846.3741        | 423.6907        | P    | 759.4763         | 380.2418        | 742.4498         | 371.7285        |                 |                  | 7  |
| 10 | 86.0964         | 977.4687  | 489.2380       | 960.4421        | 480.7247        | 959.4581        | 480.2327        | L    | 662.4236         | 331.7154        | 645.3970         | 323.2022        |                 |                  | 6  |
| 11 | 72.0808         | 1076.5371 | 538.7722       | 1059.5106       | 530.2589        | 1058.5265       | 529.7669        | V    | <b>549.3395</b>  | 275.1734        | 532.3130         | 266.6601        |                 |                  | 5  |
| 12 | <b>120.0808</b> | 1223.6055 | 612.3064       | 1206.5790       | 603.7931        | 1205.5949       | 603.3011        | F    | <b>450.2711</b>  | 225.6392        | 433.2445         | 217.1259        |                 |                  | 4  |
| 13 | 72.0808         | 1322.6739 | 661.8406       | 1305.6474       | <b>653.3273</b> | 1304.6634       | 652.8353        | V    | <b>303.2027</b>  | 152.1050        | 286.1761         | 143.5917        |                 |                  | 3  |
| 14 | 30.0338         | 1379.6954 | 690.3513       | 1362.6688       | 681.8381        | 1361.6848       | 681.3461        | G    | <b>204.1343</b>  | 102.5708        | 187.1077         | 94.0575         |                 |                  | 2  |
| 15 | 101.1073        |           |                |                 |                 |                 |                 | K    | 147.1128         | 74.0600         | 130.0863         | 65.5468         |                 |                  | 1  |

MS/MS Fragmentation of **ASHPEDPASVVEAR**

Found in **Q9UHL4**, Q9UHL4|DPP2\_HUMAN Dipeptidyl-peptidase 2 OS=Homo sapiens GN=DPP7 PE=1 SV=2

Match to Query 385: 1463.630766 from(488.884198,3+)

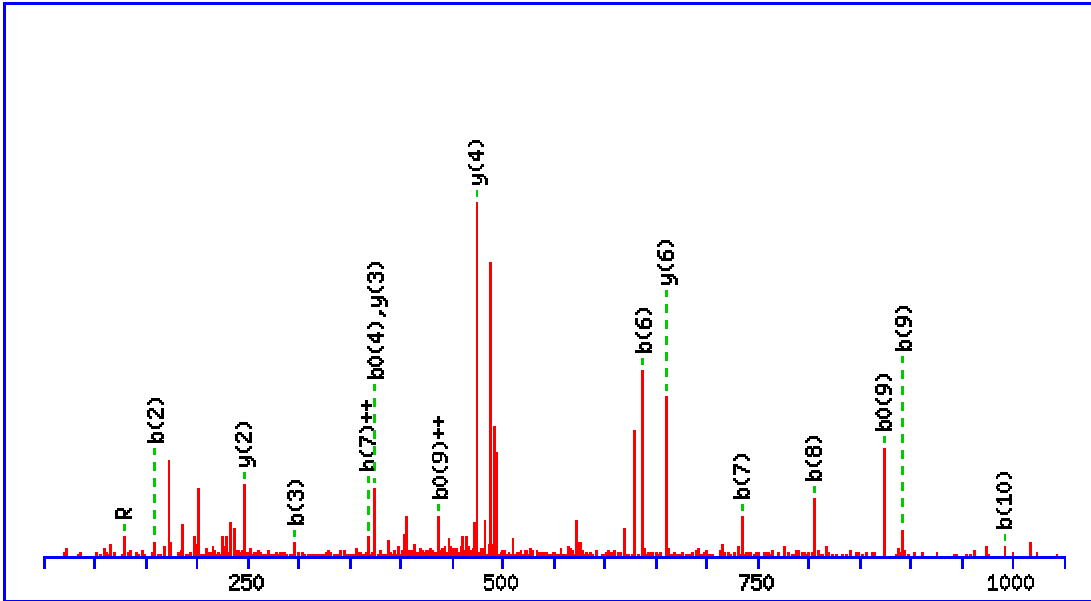

Monoisotopic mass of neutral peptide Mr(calc): 1463.7005

Fixed modifications: Carbamidomethyl (C)

Ions Score: 52 Expect: 0.00037

Matches (Bold Red): 16/138 fragment ions using 20 most intense peaks

| #  | Immon.          | b               | b <sup>++</sup> | b <sup>0</sup>  | b <sup>0++</sup> | Seq. | y               | y <sup>++</sup> | y*        | y <sup>*++</sup> | y <sup>0</sup> | y <sup>0++</sup> | #  |
|----|-----------------|-----------------|-----------------|-----------------|------------------|------|-----------------|-----------------|-----------|------------------|----------------|------------------|----|
| 1  | 44.0495         | 72.0444         | 36.5258         |                 |                  | A    |                 |                 |           |                  |                |                  | 14 |
| 2  | 60.0444         | <b>159.0764</b> | 80.0418         | 141.0659        | 71.0366          | S    | 1393.6706       | 697.3390        | 1376.6441 | 688.8257         | 1375.6601      | 688.3337         | 13 |
| 3  | 110.0713        | <b>296.1353</b> | 148.5713        | 278.1248        | 139.5660         | H    | 1306.6386       | 653.8229        | 1289.6121 | 645.3097         | 1288.6280      | 644.8177         | 12 |
| 4  | 70.0651         | 393.1881        | 197.0977        | <b>375.1775</b> | 188.0924         | P    | 1169.5797       | 585.2935        | 1152.5531 | 576.7802         | 1151.5691      | 576.2882         | 11 |
| 5  | 102.0550        | 522.2307        | 261.6190        | 504.2201        | 252.6137         | E    | 1072.5269       | 536.7671        | 1055.5004 | 528.2538         | 1054.5164      | 527.7618         | 10 |
| 6  | 88.0393         | <b>637.2576</b> | 319.1325        | 619.2471        | 310.1272         | D    | 943.4843        | 472.2458        | 926.4578  | 463.7325         | 925.4738       | 463.2405         | 9  |
| 7  | 70.0651         | <b>734.3104</b> | <b>367.6588</b> | 716.2998        | 358.6536         | P    | 828.4574        | 414.7323        | 811.4308  | 406.2191         | 810.4468       | 405.7271         | 8  |
| 8  | 44.0495         | <b>805.3475</b> | 403.1774        | 787.3369        | 394.1721         | A    | 731.4046        | 366.2060        | 714.3781  | 357.6927         | 713.3941       | 357.2007         | 7  |
| 9  | 60.0444         | <b>892.3795</b> | 446.6934        | <b>874.3690</b> | <b>437.6881</b>  | S    | <b>660.3675</b> | 330.6874        | 643.3410  | 322.1741         | 642.3569       | 321.6821         | 6  |
| 10 | 72.0808         | <b>991.4479</b> | 496.2276        | 973.4374        | 487.2223         | V    | 573.3355        | 287.1714        | 556.3089  | 278.6581         | 555.3249       | 278.1661         | 5  |
| 11 | 72.0808         | 1090.5164       | 545.7618        | 1072.5058       | 536.7565         | V    | <b>474.2671</b> | 237.6372        | 457.2405  | 229.1239         | 456.2565       | 228.6319         | 4  |
| 12 | 102.0550        | 1219.5590       | 610.2831        | 1201.5484       | 601.2778         | E    | <b>375.1987</b> | 188.1030        | 358.1721  | 179.5897         | 357.1881       | 179.0977         | 3  |
| 13 | 44.0495         | 1290.5961       | 645.8017        | 1272.5855       | 636.7964         | A    | <b>246.1561</b> | 123.5817        | 229.1295  | 115.0684         |                |                  | 2  |
| 14 | <b>129.1135</b> |                 |                 |                 |                  | R    | 175.1190        | 88.0631         | 158.0924  | 79.5498          |                |                  | 1  |

MS/MS Fragmentation of **SLPFGAQSTQR**

Found in **Q9UHL4**, Q9UHL4|DPP2\_HUMAN Dipeptidyl-peptidase 2 OS=Homo sapiens GN=DPP7 PE=1 SV=2

Match to Query 353: 1190.672782 from(596.343667,2+)

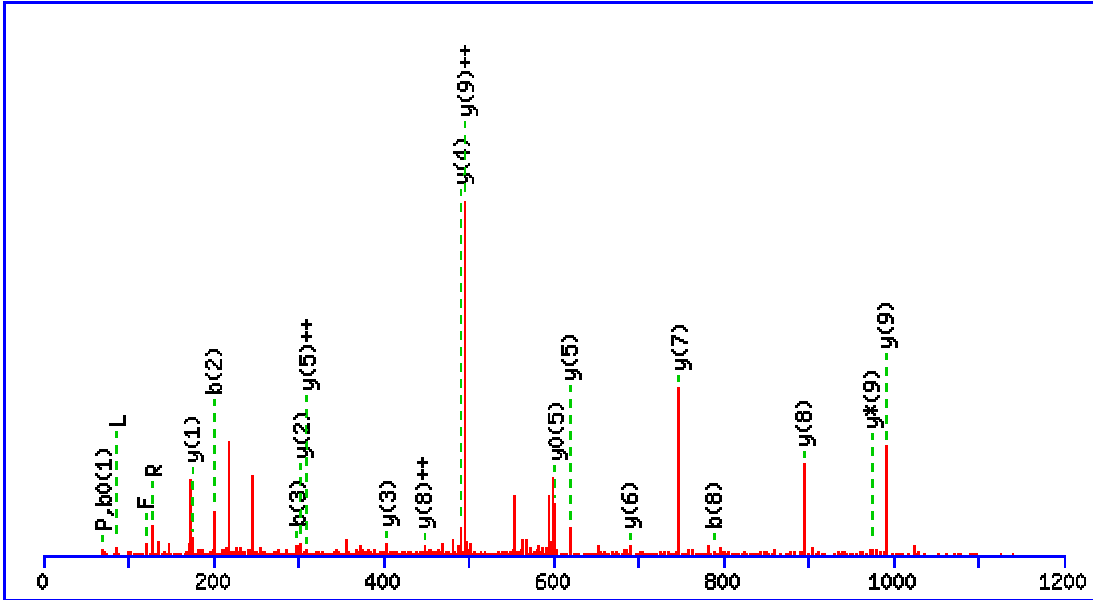

Monoisotopic mass of neutral peptide Mr(calc): 1190.6044

Fixed modifications: Carbamidomethyl (C)

Ions Score: 36 Expect: 0.018

Matches (**Bold Red**): 22/115 fragment ions using 84 most intense peaks

| #  | Immon.          | b               | b <sup>++</sup> | b*        | b <sup>***</sup> | b <sup>0</sup> | b <sup>0++</sup> | Seq. | y               | y <sup>++</sup> | y*              | y <sup>***</sup> | y <sup>0</sup>  | y <sup>0++</sup> | #  |
|----|-----------------|-----------------|-----------------|-----------|------------------|----------------|------------------|------|-----------------|-----------------|-----------------|------------------|-----------------|------------------|----|
| 1  | 60.0444         | 88.0393         | 44.5233         |           |                  | <b>70.0287</b> | 35.5180          | S    |                 |                 |                 |                  |                 |                  | 11 |
| 2  | <b>86.0964</b>  | <b>201.1234</b> | 101.0653        |           |                  | 183.1128       | 92.0600          | L    | 1104.5796       | 552.7935        | 1087.5531       | 544.2802         | 1086.5691       | 543.7882         | 10 |
| 3  | <b>70.0651</b>  | <b>298.1761</b> | 149.5917        |           |                  | 280.1656       | 140.5864         | P    | <b>991.4956</b> | <b>496.2514</b> | <b>974.4690</b> | 487.7381         | 973.4850        | 487.2461         | 9  |
| 4  | <b>120.0808</b> | 445.2445        | 223.1259        |           |                  | 427.2340       | 214.1206         | F    | <b>894.4428</b> | <b>447.7250</b> | 877.4163        | 439.2118         | 876.4322        | 438.7198         | 8  |
| 5  | 30.0338         | 502.2660        | 251.6366        |           |                  | 484.2554       | 242.6314         | G    | <b>747.3744</b> | 374.1908        | 730.3478        | 365.6776         | 729.3638        | 365.1856         | 7  |
| 6  | 44.0495         | 573.3031        | 287.1552        |           |                  | 555.2926       | 278.1499         | A    | <b>690.3529</b> | 345.6801        | 673.3264        | 337.1668         | 672.3424        | 336.6748         | 6  |
| 7  | 101.0709        | 701.3617        | 351.1845        | 684.3352  | 342.6712         | 683.3511       | 342.1792         | Q    | <b>619.3158</b> | <b>310.1615</b> | 602.2893        | 301.6483         | <b>601.3053</b> | 301.1563         | 5  |
| 8  | 60.0444         | <b>788.3937</b> | 394.7005        | 771.3672  | 386.1872         | 770.3832       | 385.6952         | S    | <b>491.2572</b> | 246.1323        | 474.2307        | 237.6190         | 473.2467        | 237.1270         | 4  |
| 9  | 74.0600         | 889.4414        | 445.2243        | 872.4149  | 436.7111         | 871.4308       | 436.2191         | T    | <b>404.2252</b> | 202.6162        | 387.1987        | 194.1030         | 386.2146        | 193.6110         | 3  |
| 10 | 101.0709        | 1017.5000       | 509.2536        | 1000.4734 | 500.7404         | 999.4894       | 500.2483         | Q    | <b>303.1775</b> | 152.0924        | 286.1510        | 143.5791         |                 |                  | 2  |
| 11 | <b>129.1135</b> |                 |                 |           |                  |                |                  | R    | <b>175.1190</b> | 88.0631         | 158.0924        | 79.5498          |                 |                  | 1  |

MS/MS Fragmentation of **LSEIDVSSEGVK**

Found in **Q96C19**, Q96C19|EFHD2\_HUMAN EF-hand domain-containing protein D2 OS=Homo sapiens  
 GN=EFHD2 PE=1 SV=1

Match to Query 494: 1261.578392 from(631.796472,2,+)

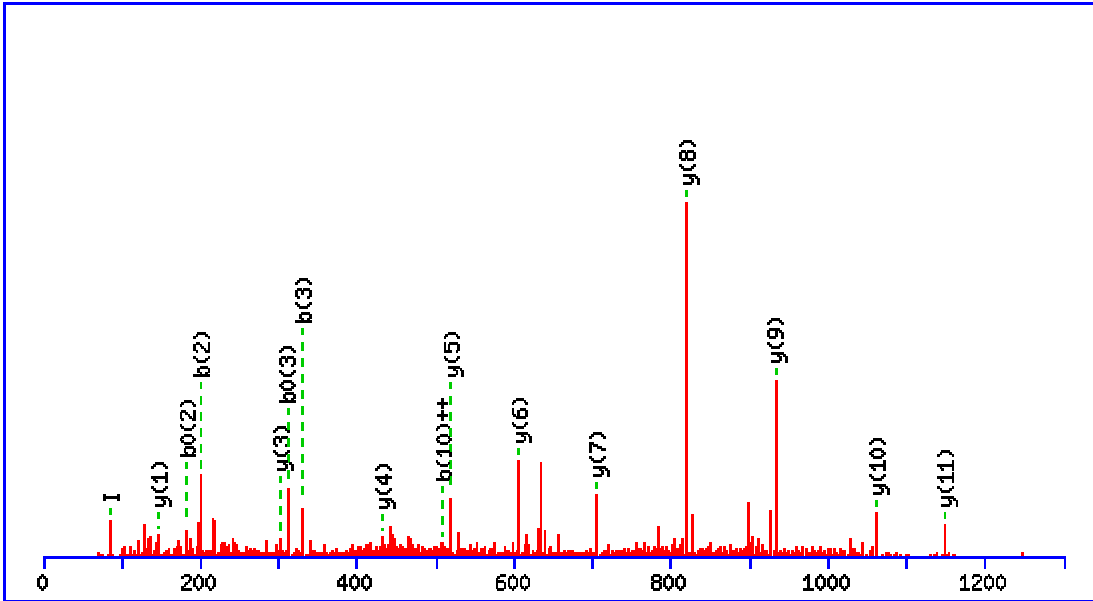

Monoisotopic mass of neutral peptide  $M_r(\text{calc})$ : 1261.6402

Fixed modifications: Carbamidomethyl (C)

Ions Score: 63 Expect: 3.6e-005

Matches (**Bold Red**): 17/114 fragment ions using 39 most intense peaks

| #  | Immon.         | b               | b <sup>++</sup> | b <sup>0</sup>  | b <sup>0++</sup> | Seq. | y                | y <sup>++</sup> | y <sup>*</sup> | y <sup>*++</sup> | y <sup>0</sup> | y <sup>0++</sup> | #  |
|----|----------------|-----------------|-----------------|-----------------|------------------|------|------------------|-----------------|----------------|------------------|----------------|------------------|----|
| 1  | <b>86.0964</b> | 114.0913        | 57.5493         |                 |                  | L    |                  |                 |                |                  |                |                  | 12 |
| 2  | 60.0444        | <b>201.1234</b> | 101.0653        | <b>183.1128</b> | 92.0600          | S    | <b>1149.5634</b> | 575.2853        | 1132.5368      | 566.7721         | 1131.5528      | 566.2800         | 11 |
| 3  | 102.0550       | <b>330.1660</b> | 165.5866        | <b>312.1554</b> | 156.5813         | E    | <b>1062.5313</b> | 531.7693        | 1045.5048      | 523.2560         | 1044.5208      | 522.7640         | 10 |
| 4  | <b>86.0964</b> | 443.2500        | 222.1287        | 425.2395        | 213.1234         | I    | <b>933.4888</b>  | 467.2480        | 916.4622       | 458.7347         | 915.4782       | 458.2427         | 9  |
| 5  | 88.0393        | 558.2770        | 279.6421        | 540.2664        | 270.6368         | D    | <b>820.4047</b>  | 410.7060        | 803.3781       | 402.1927         | 802.3941       | 401.7007         | 8  |
| 6  | 72.0808        | 657.3454        | 329.1763        | 639.3348        | 320.1710         | V    | <b>705.3777</b>  | 353.1925        | 688.3512       | 344.6792         | 687.3672       | 344.1872         | 7  |
| 7  | 60.0444        | 744.3774        | 372.6923        | 726.3668        | 363.6871         | S    | <b>606.3093</b>  | 303.6583        | 589.2828       | 295.1450         | 588.2988       | 294.6530         | 6  |
| 8  | 60.0444        | 831.4094        | 416.2084        | 813.3989        | 407.2031         | S    | <b>519.2773</b>  | 260.1423        | 502.2508       | 251.6290         | 501.2667       | 251.1370         | 5  |
| 9  | 102.0550       | 960.4520        | 480.7297        | 942.4415        | 471.7244         | E    | <b>432.2453</b>  | 216.6263        | 415.2187       | 208.1130         | 414.2347       | 207.6210         | 4  |
| 10 | 30.0338        | 1017.4735       | <b>509.2404</b> | 999.4629        | 500.2351         | G    | <b>303.2027</b>  | 152.1050        | 286.1761       | 143.5917         |                |                  | 3  |
| 11 | 72.0808        | 1116.5419       | 558.7746        | 1098.5313       | 549.7693         | V    | 246.1812         | 123.5942        | 229.1547       | 115.0810         |                |                  | 2  |
| 12 | 101.1073       |                 |                 |                 |                  | K    | <b>147.1128</b>  | 74.0600         | 130.0863       | 65.5468          |                |                  | 1  |

MS/MS Fragmentation of **LGAVDESLSSEETQK**

Found in **Q96HE7**, Q96HE7|ERO1A\_HUMAN ERO1-like protein alpha OS=Homo sapiens GN=ERO1L PE=1 SV=2

Match to Query 646: 1504.671992 from(753.343272,2+)

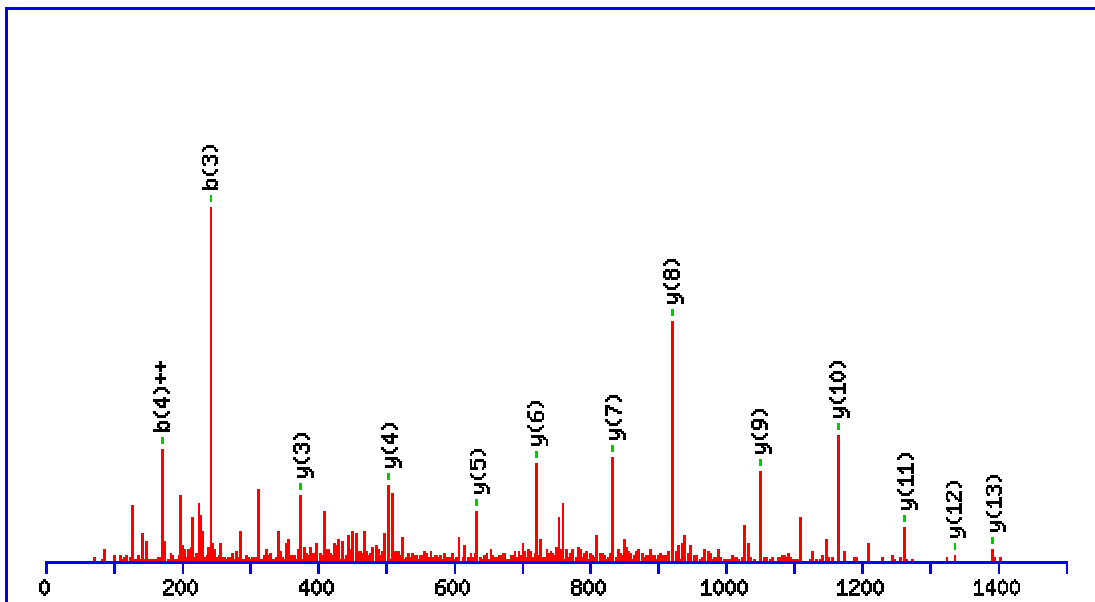

Monoisotopic mass of neutral peptide Mr(calc): 1504.7257

Fixed modifications: Carbamidomethyl (C)

Ions Score: 119 Expect: 7.9e-011

Matches (Bold Red): 14/134 fragment ions using 15 most intense peaks

| #  | Immon.   | b               | b <sup>++</sup> | b <sup>*</sup> | b <sup>***</sup> | b <sup>0</sup> | b <sup>0++</sup> | Seq. | y                | y <sup>++</sup> | y <sup>*</sup> | y <sup>***</sup> | y <sup>0</sup> | y <sup>0++</sup> | #  |
|----|----------|-----------------|-----------------|----------------|------------------|----------------|------------------|------|------------------|-----------------|----------------|------------------|----------------|------------------|----|
| 1  | 86.0964  | 114.0913        | 57.5493         |                |                  |                |                  | L    |                  |                 |                |                  |                |                  | 14 |
| 2  | 30.0338  | <b>171.1128</b> | 86.0600         |                |                  |                |                  | G    | <b>1392.6489</b> | 696.8281        | 1375.6223      | 688.3148         | 1374.6383      | 687.8228         | 13 |
| 3  | 44.0495  | <b>242.1499</b> | 121.5786        |                |                  |                |                  | A    | <b>1335.6274</b> | 668.3174        | 1318.6009      | 659.8041         | 1317.6169      | 659.3121         | 12 |
| 4  | 72.0808  | 341.2183        | <b>171.1128</b> |                |                  |                |                  | V    | <b>1264.5903</b> | 632.7988        | 1247.5638      | 624.2855         | 1246.5798      | 623.7935         | 11 |
| 5  | 88.0393  | 456.2453        | 228.6263        |                |                  | 438.2347       | 219.6210         | D    | <b>1165.5219</b> | 583.2646        | 1148.4954      | 574.7513         | 1147.5113      | 574.2593         | 10 |
| 6  | 102.0550 | 585.2879        | 293.1476        |                |                  | 567.2773       | 284.1423         | E    | <b>1050.4950</b> | 525.7511        | 1033.4684      | 517.2378         | 1032.4844      | 516.7458         | 9  |
| 7  | 60.0444  | 672.3199        | 336.6636        |                |                  | 654.3093       | 327.6583         | S    | <b>921.4524</b>  | 461.2298        | 904.4258       | 452.7165         | 903.4418       | 452.2245         | 8  |
| 8  | 86.0964  | 785.4040        | 393.2056        |                |                  | 767.3934       | 384.2003         | L    | <b>834.4203</b>  | 417.7138        | 817.3938       | 409.2005         | 816.4098       | 408.7085         | 7  |
| 9  | 60.0444  | 872.4360        | 436.7216        |                |                  | 854.4254       | 427.7163         | S    | <b>721.3363</b>  | 361.1718        | 704.3097       | 352.6585         | 703.3257       | 352.1665         | 6  |
| 10 | 102.0550 | 1001.4786       | 501.2429        |                |                  | 983.4680       | 492.2376         | E    | <b>634.3042</b>  | 317.6558        | 617.2777       | 309.1425         | 616.2937       | 308.6505         | 5  |
| 11 | 102.0550 | 1130.5212       | 565.7642        |                |                  | 1112.5106      | 556.7589         | E    | <b>505.2617</b>  | 253.1345        | 488.2351       | 244.6212         | 487.2511       | 244.1292         | 4  |
| 12 | 74.0600  | 1231.5689       | 616.2881        |                |                  | 1213.5583      | 607.2828         | T    | <b>376.2191</b>  | 188.6132        | 359.1925       | 180.0999         | 358.2085       | 179.6079         | 3  |
| 13 | 101.0709 | 1359.6274       | 680.3174        | 1342.6009      | 671.8041         | 1341.6169      | 671.3121         | Q    | 275.1714         | 138.0893        | 258.1448       | 129.5761         |                |                  | 2  |
| 14 | 101.1073 |                 |                 |                |                  |                |                  | K    | 147.1128         | 74.0600         | 130.0863       | 65.5468          |                |                  | 1  |



MS/MS Fragmentation of **AIEMLGGELGSK**

Found in **P07954**, P07954|FUMH\_HUMAN Fumarate hydratase, mitochondrial OS=Homo sapiens GN=FUH PE=1 SV=3

Match to Query 456: 1219.572344 from(610.793448,2+)

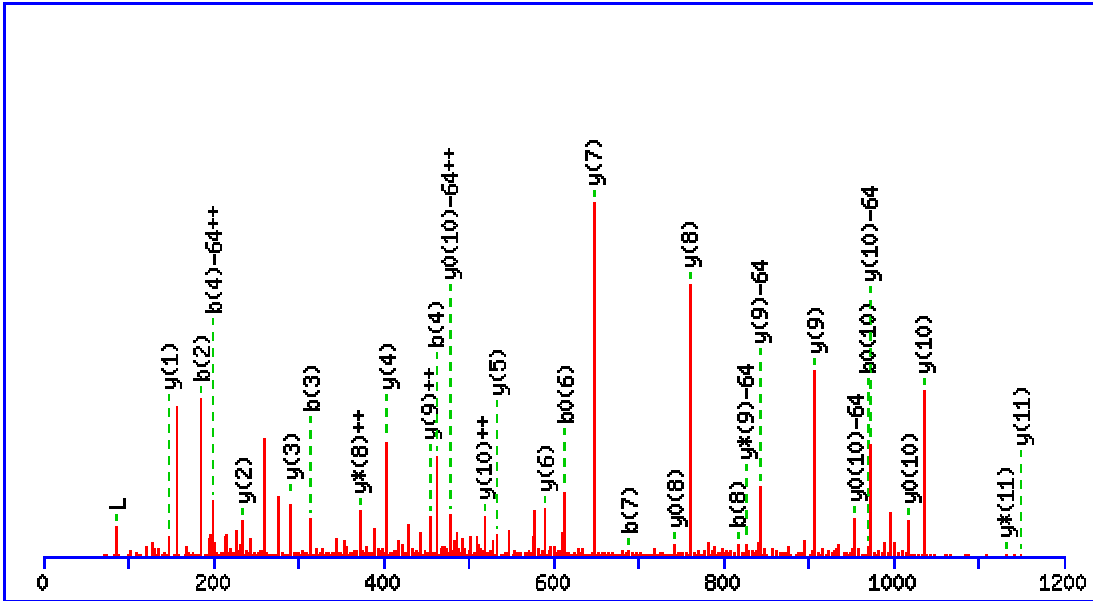

Monoisotopic mass of neutral peptide Mr(calc): 1219.6118

Fixed modifications: Carbamidomethyl (C)

Variable modifications:

M4 : Oxidation (M), with neutral losses 0.0000(shown in table), 63.9983

Ions Score: 72 Expect: 5e-006

Matches (Bold Red): 33/167 fragment ions using 61 most intense peaks

| #  | Immon.         | b               | b <sup>++</sup> | b <sup>0</sup>  | b <sup>0++</sup> | Seq. | y                | y <sup>++</sup> | y <sup>*</sup>   | y <sup>*++</sup> | y <sup>0</sup>   | y <sup>0++</sup> | #  |
|----|----------------|-----------------|-----------------|-----------------|------------------|------|------------------|-----------------|------------------|------------------|------------------|------------------|----|
| 1  | 44.0495        | 72.0444         | 36.5258         |                 |                  | A    |                  |                 |                  |                  |                  |                  | 12 |
| 2  | <b>86.0964</b> | <b>185.1285</b> | 93.0679         |                 |                  | I    | <b>1149.5820</b> | 575.2946        | <b>1132.5555</b> | 566.7814         | 1131.5714        | 566.2894         | 11 |
| 3  | 102.0550       | <b>314.1710</b> | 157.5892        | 296.1605        | 148.5839         | E    | <b>1036.4979</b> | <b>518.7526</b> | 1019.4714        | 510.2393         | <b>1018.4874</b> | 509.7473         | 10 |
| 4  | 120.0478       | <b>461.2065</b> | 231.1069        | 443.1959        | 222.1016         | M    | <b>907.4553</b>  | <b>454.2313</b> | 890.4288         | 445.7180         | 889.4448         | 445.2260         | 9  |
| 5  | <b>86.0964</b> | 574.2905        | 287.6489        | 556.2799        | 278.6436         | L    | <b>760.4199</b>  | 380.7136        | 743.3934         | <b>372.2003</b>  | <b>742.4094</b>  | 371.7083         | 8  |
| 6  | 30.0338        | 631.3120        | 316.1596        | <b>613.3014</b> | 307.1543         | G    | <b>647.3359</b>  | 324.1716        | 630.3093         | 315.6583         | 629.3253         | 315.1663         | 7  |
| 7  | 30.0338        | <b>688.3334</b> | 344.6704        | 670.3229        | 335.6651         | G    | <b>590.3144</b>  | 295.6608        | 573.2879         | 287.1476         | 572.3039         | 286.6556         | 6  |
| 8  | 102.0550       | <b>817.3760</b> | 409.1917        | 799.3655        | 400.1864         | E    | <b>533.2930</b>  | 267.1501        | 516.2664         | 258.6368         | 515.2824         | 258.1448         | 5  |
| 9  | <b>86.0964</b> | 930.4601        | 465.7337        | 912.4495        | 456.7284         | L    | <b>404.2504</b>  | 202.6288        | 387.2238         | 194.1155         | 386.2398         | 193.6235         | 4  |
| 10 | 30.0338        | 987.4816        | 494.2444        | <b>969.4710</b> | 485.2391         | G    | <b>291.1663</b>  | 146.0868        | 274.1397         | 137.5735         | 273.1557         | 137.0815         | 3  |
| 11 | 60.0444        | 1074.5136       | 537.7604        | 1056.5030       | 528.7552         | S    | <b>234.1448</b>  | 117.5761        | 217.1183         | 109.0628         | 216.1343         | 108.5708         | 2  |
| 12 | 101.1073       |                 |                 |                 |                  | K    | <b>147.1128</b>  | 74.0600         | 130.0863         | 65.5468          |                  |                  | 1  |

MS/MS Fragmentation of **ASADGSSFVVAR**

Found in **Q9H4G4**, Q9H4G4|GAPR1\_HUMAN Golgi-associated plant pathogenesis-related protein 1  
 OS=Homo sapiens GN=GLIPR2 PE=1 SV=3

Match to Query 315: 1252.592890 from(627.303721,2,+)

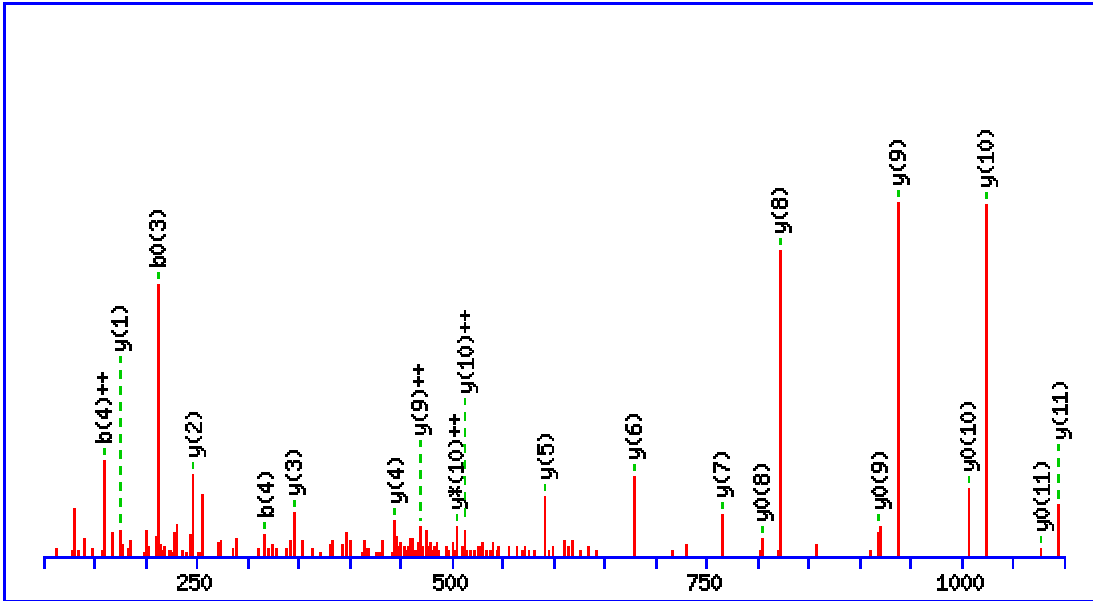

Monoisotopic mass of neutral peptide Mr(calc): 1252.6048

Fixed modifications: Carbamidomethyl (C)

Ions Score: 98 Expect: 1e-008

Matches (Bold Red): 22/121 fragment ions using 31 most intense peaks

| #  | Immon.   | b               | b <sup>++</sup> | b <sup>0</sup>  | b <sup>0++</sup> | Seq. | y                | y <sup>++</sup> | y*        | y <sup>*++</sup> | y <sup>0</sup>   | y <sup>0++</sup> | #  |
|----|----------|-----------------|-----------------|-----------------|------------------|------|------------------|-----------------|-----------|------------------|------------------|------------------|----|
| 1  | 44.0495  | 72.0444         | 36.5258         |                 |                  | A    |                  |                 |           |                  |                  |                  | 13 |
| 2  | 60.0444  | <b>159.0764</b> | 80.0418         | 141.0659        | 71.0366          | S    | 1182.5749        | 591.7911        | 1165.5484 | 583.2778         | 1164.5644        | 582.7858         | 12 |
| 3  | 44.0495  | 230.1135        | 115.5604        | <b>212.1030</b> | 106.5551         | A    | <b>1095.5429</b> | 548.2751        | 1078.5164 | 539.7618         | <b>1077.5323</b> | 539.2698         | 11 |
| 4  | 60.0444  | <b>317.1456</b> | <b>159.0764</b> | 299.1350        | 150.0711         | S    | <b>1024.5058</b> | <b>512.7565</b> | 1007.4792 | <b>504.2433</b>  | <b>1006.4952</b> | 503.7513         | 10 |
| 5  | 88.0393  | 432.1725        | 216.5899        | 414.1619        | 207.5846         | D    | <b>937.4738</b>  | <b>469.2405</b> | 920.4472  | 460.7272         | <b>919.4632</b>  | 460.2352         | 9  |
| 6  | 30.0338  | 489.1940        | 245.1006        | 471.1834        | 236.0953         | G    | <b>822.4468</b>  | 411.7271        | 805.4203  | 403.2138         | <b>804.4363</b>  | 402.7218         | 8  |
| 7  | 60.0444  | 576.2260        | 288.6166        | 558.2154        | 279.6114         | S    | <b>765.4254</b>  | 383.2163        | 748.3988  | 374.7030         | 747.4148         | 374.2110         | 7  |
| 8  | 60.0444  | 663.2580        | 332.1326        | 645.2475        | 323.1274         | S    | <b>678.3933</b>  | 339.7003        | 661.3668  | 331.1870         | 660.3828         | 330.6950         | 6  |
| 9  | 120.0808 | 810.3264        | 405.6669        | 792.3159        | 396.6616         | F    | <b>591.3613</b>  | 296.1843        | 574.3348  | 287.6710         |                  |                  | 5  |
| 10 | 72.0808  | 909.3949        | 455.2011        | 891.3843        | 446.1958         | V    | <b>444.2929</b>  | 222.6501        | 427.2663  | 214.1368         |                  |                  | 4  |
| 11 | 72.0808  | 1008.4633       | 504.7353        | 990.4527        | 495.7300         | V    | <b>345.2245</b>  | 173.1159        | 328.1979  | 164.6026         |                  |                  | 3  |
| 12 | 44.0495  | 1079.5004       | 540.2538        | 1061.4898       | 531.2485         | A    | <b>246.1561</b>  | 123.5817        | 229.1295  | 115.0684         |                  |                  | 2  |
| 13 | 129.1135 |                 |                 |                 |                  | R    | <b>175.1190</b>  | 88.0631         | 158.0924  | 79.5498          |                  |                  | 1  |

MS/MS Fragmentation of **SGSSVAAMKK**

Found in **P63218**, P63218|GBG5\_HUMAN Guanine nucleotide-binding protein G(I)/G(S)/G(O) subunit gamma-5 OS=Homo sapiens GN=GNG5 PE=1 SV=3

Match to Query 153: 1109.393288 from(555.703920,2+)

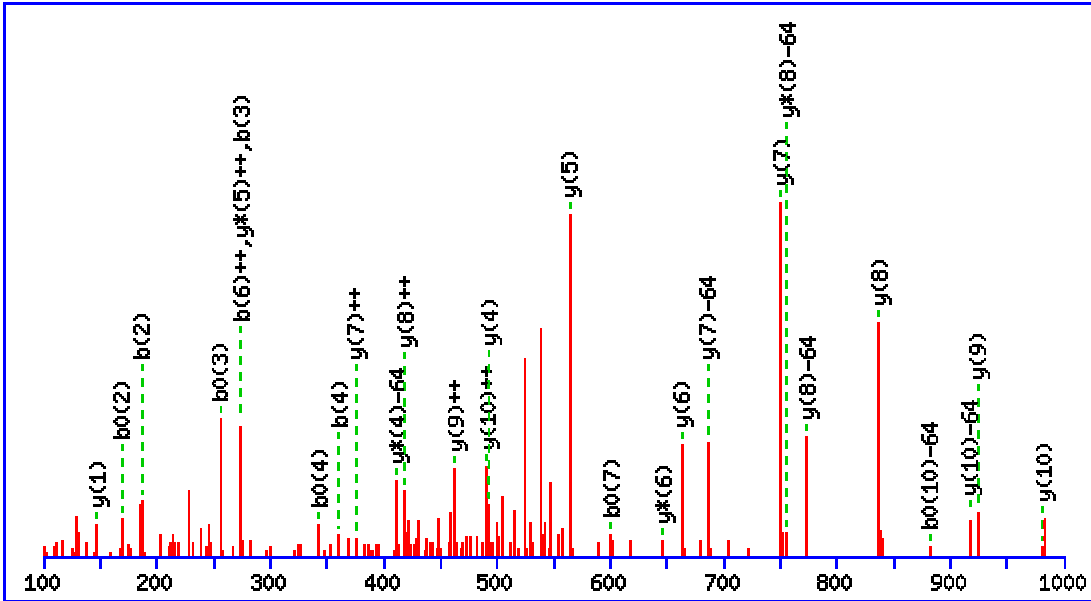

**Monoisotopic mass of neutral peptide Mr(calc):** 1109.5387

**Fixed modifications:** Carbamidomethyl (C)

**Variable modifications:**

**N-term :** Acetyl (Protein N-term)

**M9 :** Oxidation (M), with neutral losses 0.0000(shown in table), 63.9983

**Ions Score:** 49 **Expect:** 0.00075

**Matches (Bold Red):** 28/152 fragment ions using 47 most intense peaks

| #  | Immon.   | b               | b <sup>++</sup> | b <sup>*</sup> | b <sup>*++</sup> | b <sup>0</sup>  | b <sup>0++</sup> | Seq. | y               | y <sup>++</sup> | y <sup>*</sup>  | y <sup>*++</sup> | y <sup>0</sup> | y <sup>0++</sup> | #  |
|----|----------|-----------------|-----------------|----------------|------------------|-----------------|------------------|------|-----------------|-----------------|-----------------|------------------|----------------|------------------|----|
| 1  | 60.0444  | 130.0499        | 65.5286         |                |                  | 112.0393        | 56.5233          | S    |                 |                 |                 |                  |                |                  | 11 |
| 2  | 30.0338  | <b>187.0713</b> | 94.0393         |                |                  | <b>169.0608</b> | 85.0340          | G    | <b>981.5034</b> | <b>491.2553</b> | 964.4768        | 482.7420         | 963.4928       | 482.2500         | 10 |
| 3  | 60.0444  | <b>274.1034</b> | 137.5553        |                |                  | <b>256.0928</b> | 128.5500         | S    | <b>924.4819</b> | <b>462.7446</b> | 907.4553        | 454.2313         | 906.4713       | 453.7393         | 9  |
| 4  | 60.0444  | <b>361.1354</b> | 181.0713        |                |                  | <b>343.1248</b> | 172.0660         | S    | <b>837.4499</b> | <b>419.2286</b> | 820.4233        | 410.7153         | 819.4393       | 410.2233         | 8  |
| 5  | 60.0444  | 448.1674        | 224.5873        |                |                  | 430.1568        | 215.5821         | S    | <b>750.4178</b> | <b>375.7126</b> | 733.3913        | 367.1993         | 732.4073       | 366.7073         | 7  |
| 6  | 72.0808  | 547.2358        | <b>274.1216</b> |                |                  | 529.2253        | 265.1163         | V    | <b>663.3858</b> | 332.1965        | <b>646.3593</b> | 323.6833         |                |                  | 6  |
| 7  | 44.0495  | 618.2729        | 309.6401        |                |                  | <b>600.2624</b> | 300.6348         | A    | <b>564.3174</b> | 282.6623        | 547.2908        | <b>274.1491</b>  |                |                  | 5  |
| 8  | 44.0495  | 689.3101        | 345.1587        |                |                  | 671.2995        | 336.1534         | A    | <b>493.2803</b> | 247.1438        | 476.2537        | 238.6305         |                |                  | 4  |
| 9  | 120.0478 | 836.3455        | 418.6764        |                |                  | 818.3349        | 409.6711         | M    | 422.2432        | 211.6252        | 405.2166        | 203.1119         |                |                  | 3  |
| 10 | 101.1073 | 964.4404        | 482.7238        | 947.4139       | 474.2106         | 946.4299        | 473.7186         | K    | 275.2078        | 138.1075        | 258.1812        | 129.5942         |                |                  | 2  |
| 11 | 101.1073 |                 |                 |                |                  |                 |                  | K    | <b>147.1128</b> | 74.0600         | 130.0863        | 65.5468          |                |                  | 1  |

MS/MS Fragmentation of **VTAPPEAEYSGLV**

Found in **P08648**, P08648|ITA5\_HUMAN Integrin alpha-5 OS=Homo sapiens GN=ITGA5 PE=1 SV=2

Match to Query 597: 1487.817770 from(744.916161,2+)

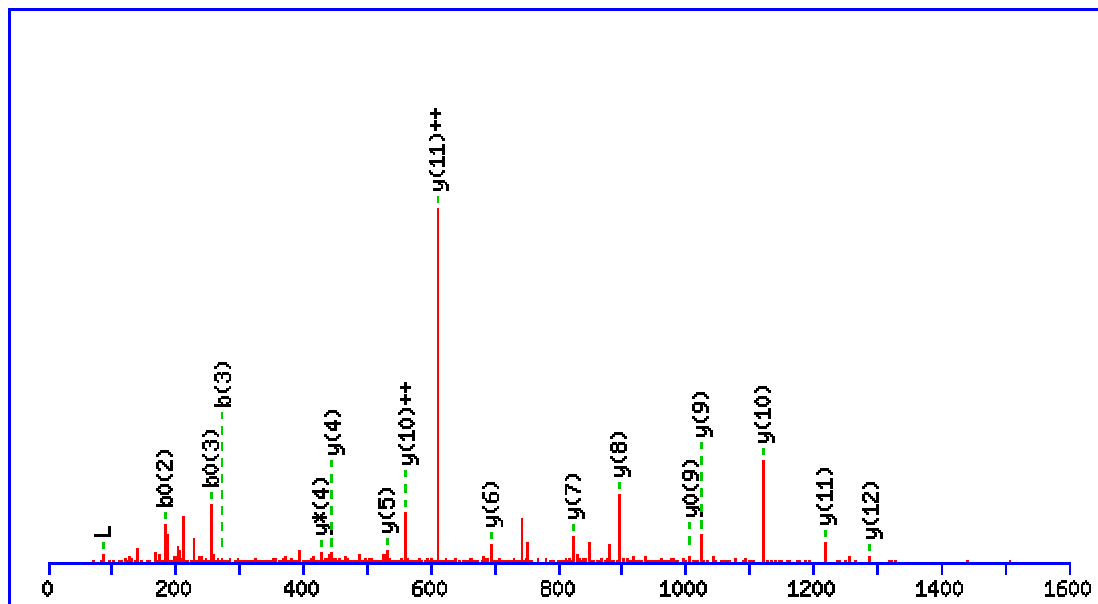

Monoisotopic mass of neutral peptide Mr(calc): 1487.7620

Fixed modifications: Carbamidomethyl (C)

Ions Score: 43 Expect: 0.0035

Matches (Bold Red): 17/134 fragment ions using 45 most intense peaks

| #  | Immon.         | b               | b <sup>++</sup> | b <sup>0</sup>  | b <sup>0++</sup> | Seq. | y                | y <sup>++</sup> | y*              | y <sup>*++</sup> | y <sup>0</sup>   | y <sup>0++</sup> | #  |
|----|----------------|-----------------|-----------------|-----------------|------------------|------|------------------|-----------------|-----------------|------------------|------------------|------------------|----|
| 1  | 72.0808        | 100.0757        | 50.5415         |                 |                  | V    |                  |                 |                 |                  |                  |                  | 14 |
| 2  | 74.0600        | 201.1234        | 101.0653        | <b>183.1128</b> | 92.0600          | T    | 1389.7009        | 695.3541        | 1372.6743       | 686.8408         | 1371.6903        | 686.3488         | 13 |
| 3  | 44.0495        | <b>272.1605</b> | 136.5839        | <b>254.1499</b> | 127.5786         | A    | <b>1288.6532</b> | 644.8302        | 1271.6266       | 636.3170         | 1270.6426        | 635.8250         | 12 |
| 4  | 70.0651        | 369.2132        | 185.1103        | 351.2027        | 176.1050         | P    | <b>1217.6161</b> | <b>609.3117</b> | 1200.5895       | 600.7984         | 1199.6055        | 600.3064         | 11 |
| 5  | 70.0651        | 466.2660        | 233.6366        | 448.2554        | 224.6314         | P    | <b>1120.5633</b> | <b>560.7853</b> | 1103.5368       | 552.2720         | 1102.5528        | 551.7800         | 10 |
| 6  | 102.0550       | 595.3086        | 298.1579        | 577.2980        | 289.1527         | E    | <b>1023.5106</b> | 512.2589        | 1006.4840       | 503.7456         | <b>1005.5000</b> | 503.2536         | 9  |
| 7  | 44.0495        | 666.3457        | 333.6765        | 648.3352        | 324.6712         | A    | <b>894.4680</b>  | 447.7376        | 877.4414        | 439.2243         | 876.4574         | 438.7323         | 8  |
| 8  | 102.0550       | 795.3883        | 398.1978        | 777.3777        | 389.1925         | E    | <b>823.4308</b>  | 412.2191        | 806.4043        | 403.7058         | 805.4203         | 403.2138         | 7  |
| 9  | 136.0757       | 958.4516        | 479.7295        | 940.4411        | 470.7242         | Y    | <b>694.3883</b>  | 347.6978        | 677.3617        | 339.1845         | 676.3777         | 338.6925         | 6  |
| 10 | 60.0444        | 1045.4837       | 523.2455        | 1027.4731       | 514.2402         | S    | <b>531.3249</b>  | 266.1661        | 514.2984        | 257.6528         | 513.3144         | 257.1608         | 5  |
| 11 | 30.0338        | 1102.5051       | 551.7562        | 1084.4946       | 542.7509         | G    | <b>444.2929</b>  | 222.6501        | <b>427.2663</b> | 214.1368         |                  |                  | 4  |
| 12 | <b>86.0964</b> | 1215.5892       | 608.2982        | 1197.5786       | 599.2930         | L    | 387.2714         | 194.1394        | 370.2449        | 185.6261         |                  |                  | 3  |
| 13 | 72.0808        | 1314.6576       | 657.8324        | 1296.6470       | 648.8272         | V    | 274.1874         | 137.5973        | 257.1608        | 129.0840         |                  |                  | 2  |
| 14 | 129.1135       |                 |                 |                 |                  | R    | 175.1190         | 88.0631         | 158.0924        | 79.5498          |                  |                  | 1  |

MS/MS Fragmentation of **LLVCDLGNPMK**

Found in **P08648**, P08648|ITA5\_HUMAN Integrin alpha-5 OS=Homo sapiens GN=ITGA5 PE=1 SV=2

Match to Query 373: 1274.841874 from(638.428213,2+)

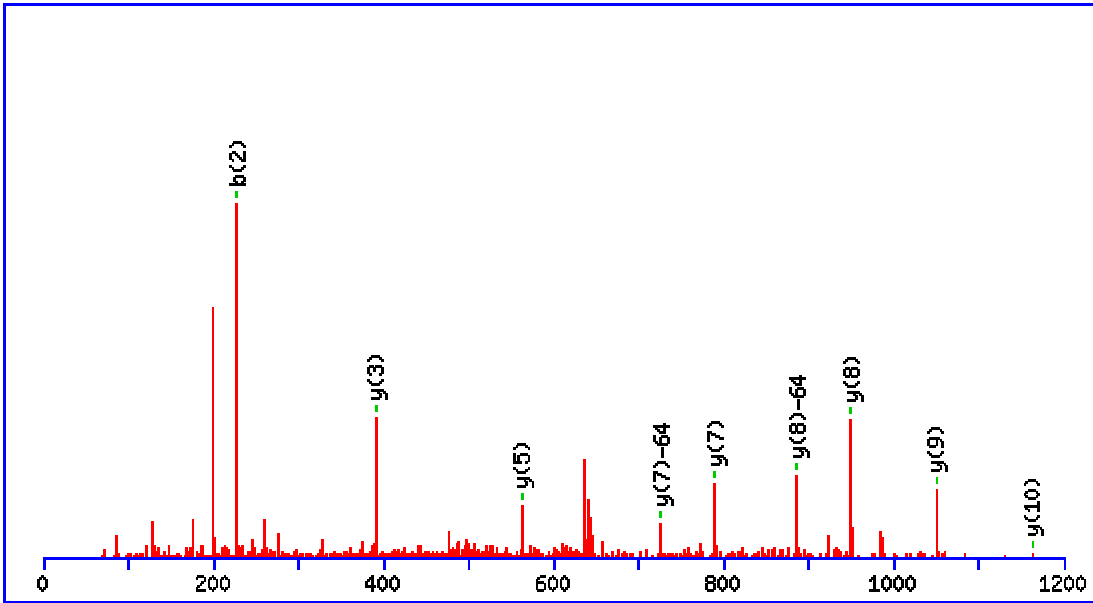

Monoisotopic mass of neutral peptide Mr(calc): 1274.6363

Fixed modifications: Carbamidomethyl (C)

Variable modifications:

M10 : Oxidation (M), with neutral losses 0.0000(shown in table), 63.9983

Ions Score: 39 Expect: 0.0093

Matches (**Bold Red**): 9/148 fragment ions using 20 most intense peaks

| #  | Immon.   | b               | b <sup>++</sup> | b*        | b <sup>*++</sup> | b <sup>0</sup> | b <sup>0++</sup> | Seq. | y                | y <sup>++</sup> | y*        | y <sup>*++</sup> | y <sup>0</sup> | y <sup>0++</sup> | #  |
|----|----------|-----------------|-----------------|-----------|------------------|----------------|------------------|------|------------------|-----------------|-----------|------------------|----------------|------------------|----|
| 1  | 86.0964  | 114.0913        | 57.5493         |           |                  |                |                  | L    |                  |                 |           |                  |                |                  | 11 |
| 2  | 86.0964  | <b>227.1754</b> | 114.0913        |           |                  |                |                  | L    | <b>1162.5595</b> | 581.7834        | 1145.5329 | 573.2701         | 1144.5489      | 572.7781         | 10 |
| 3  | 72.0808  | 326.2438        | 163.6255        |           |                  |                |                  | V    | <b>1049.4754</b> | 525.2414        | 1032.4489 | 516.7281         | 1031.4649      | 516.2361         | 9  |
| 4  | 133.0430 | 486.2745        | 243.6409        |           |                  |                |                  | C    | <b>950.4070</b>  | 475.7071        | 933.3805  | 467.1939         | 932.3965       | 466.7019         | 8  |
| 5  | 88.0393  | 601.3014        | 301.1543        |           |                  | 583.2908       | 292.1491         | D    | <b>790.3764</b>  | 395.6918        | 773.3498  | 387.1785         | 772.3658       | 386.6865         | 7  |
| 6  | 86.0964  | 714.3855        | 357.6964        |           |                  | 696.3749       | 348.6911         | L    | 675.3494         | 338.1784        | 658.3229  | 329.6651         |                |                  | 6  |
| 7  | 30.0338  | 771.4069        | 386.2071        |           |                  | 753.3964       | 377.2018         | G    | <b>562.2654</b>  | 281.6363        | 545.2388  | 273.1230         |                |                  | 5  |
| 8  | 87.0553  | 885.4499        | 443.2286        | 868.4233  | 434.7153         | 867.4393       | 434.2233         | N    | 505.2439         | 253.1256        | 488.2173  | 244.6123         |                |                  | 4  |
| 9  | 70.0651  | 982.5026        | 491.7550        | 965.4761  | 483.2417         | 964.4921       | 482.7497         | P    | <b>391.2010</b>  | 196.1041        | 374.1744  | 187.5908         |                |                  | 3  |
| 10 | 120.0478 | 1129.5380       | 565.2727        | 1112.5115 | 556.7594         | 1111.5275      | 556.2674         | M    | 294.1482         | 147.5777        | 277.1217  | 139.0645         |                |                  | 2  |
| 11 | 101.1073 |                 |                 |           |                  |                |                  | K    | 147.1128         | 74.0600         | 130.0863  | 65.5468          |                |                  | 1  |

MS/MS Fragmentation of **CQVEGGAPR**

Found in **P05362**, P05362|ICAM1\_HUMAN Intercellular adhesion molecule 1 OS=Homo sapiens GN=ICAM1 PE=1 SV=2

Match to Query 175: 972.279418 from(487.146985,2+)

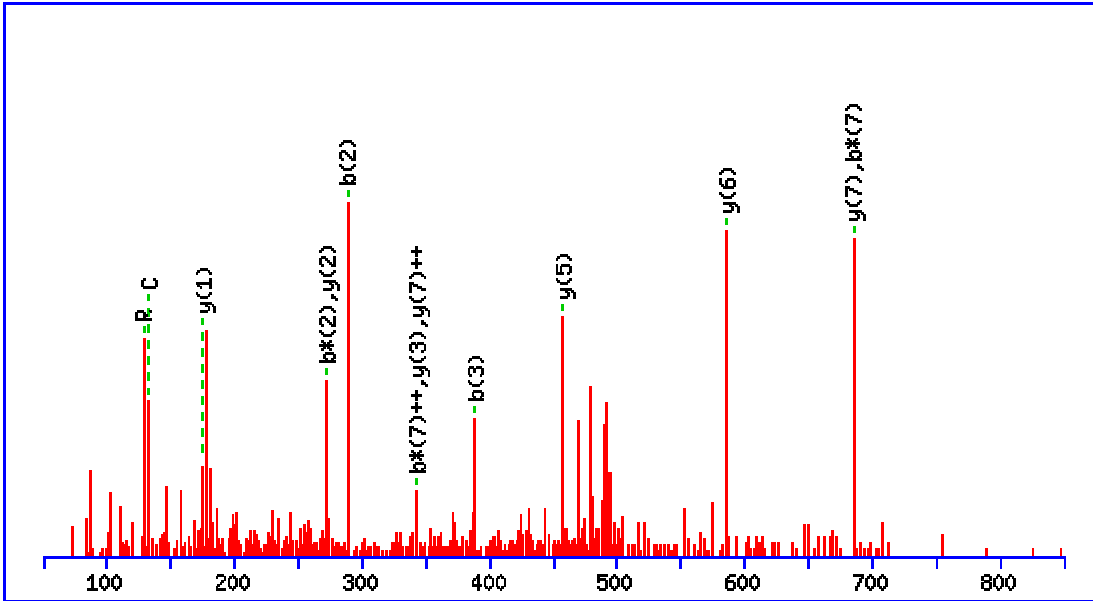

Monoisotopic mass of neutral peptide Mr(calc): 972.4447

Fixed modifications: Carbamidomethyl (C)

Ions Score: 38 Expect: 0.0062

Matches (Bold Red): 14/87 fragment ions using 28 most intense peaks

| # | Immon.          | b               | b <sup>++</sup> | b <sup>*</sup>  | b <sup>*++</sup> | b <sup>0</sup> | b <sup>0++</sup> | Seq. | y               | y <sup>++</sup> | y <sup>*</sup> | y <sup>*++</sup> | y <sup>0</sup> | y <sup>0++</sup> | # |
|---|-----------------|-----------------|-----------------|-----------------|------------------|----------------|------------------|------|-----------------|-----------------|----------------|------------------|----------------|------------------|---|
| 1 | <b>133.0430</b> | 161.0379        | 81.0226         |                 |                  |                |                  | C    |                 |                 |                |                  |                |                  | 9 |
| 2 | 101.0709        | <b>289.0965</b> | 145.0519        | <b>272.0700</b> | 136.5386         |                |                  | Q    | 813.4213        | 407.2143        | 796.3948       | 398.7010         | 795.4108       | 398.2090         | 8 |
| 3 | 72.0808         | <b>388.1649</b> | 194.5861        | 371.1384        | 186.0728         |                |                  | V    | <b>685.3628</b> | <b>343.1850</b> | 668.3362       | 334.6717         | 667.3522       | 334.1797         | 7 |
| 4 | 102.0550        | 517.2075        | 259.1074        | 500.1810        | 250.5941         | 499.1969       | 250.1021         | E    | <b>586.2944</b> | 293.6508        | 569.2678       | 285.1375         | 568.2838       | 284.6455         | 6 |
| 5 | 30.0338         | 574.2290        | 287.6181        | 557.2024        | 279.1049         | 556.2184       | 278.6128         | G    | <b>457.2518</b> | 229.1295        | 440.2252       | 220.6162         |                |                  | 5 |
| 6 | 30.0338         | 631.2504        | 316.1289        | 614.2239        | 307.6156         | 613.2399       | 307.1236         | G    | 400.2303        | 200.6188        | 383.2037       | 192.1055         |                |                  | 4 |
| 7 | 44.0495         | 702.2876        | 351.6474        | <b>685.2610</b> | <b>343.1341</b>  | 684.2770       | 342.6421         | A    | <b>343.2088</b> | 172.1081        | 326.1823       | 163.5948         |                |                  | 3 |
| 8 | 70.0651         | 799.3403        | 400.1738        | 782.3138        | 391.6605         | 781.3298       | 391.1685         | P    | <b>272.1717</b> | 136.5895        | 255.1452       | 128.0762         |                |                  | 2 |
| 9 | <b>129.1135</b> |                 |                 |                 |                  |                |                  | R    | <b>175.1190</b> | 88.0631         | 158.0924       | 79.5498          |                |                  | 1 |

MS/MS Fragmentation of **VAEVEGEQVDNK**

Found in **O95202**, O95202|LETM1\_HUMAN LETM1 and EF-hand domain-containing protein 1, mitochondrial OS=Homo sapiens GN=LETM1 PE=1 SV=1

Match to Query 396: 1315.684898 from(658.849725,2+)

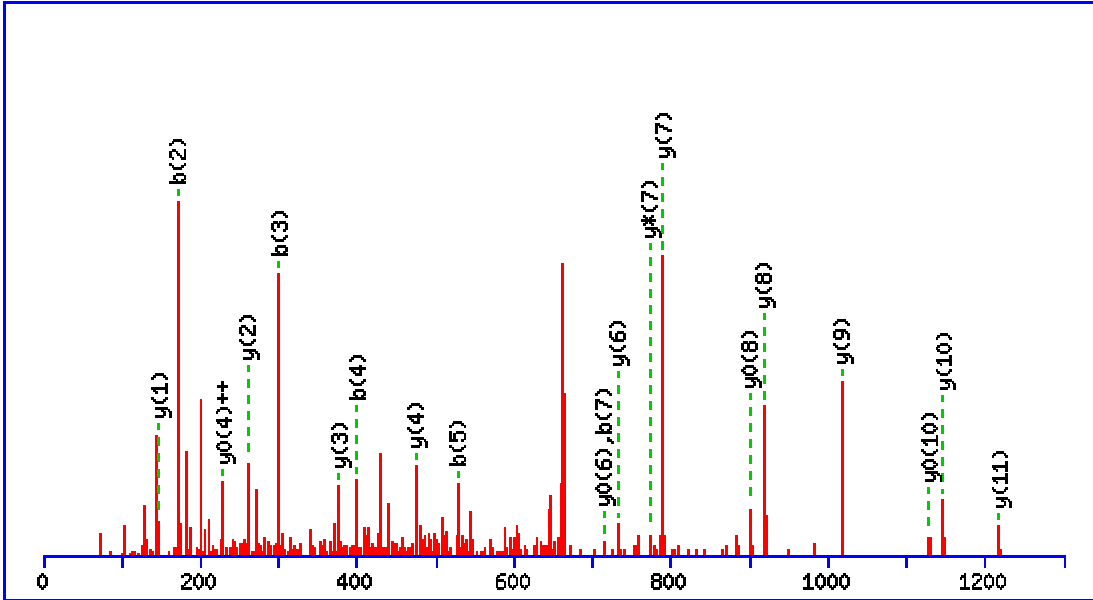

Monoisotopic mass of neutral peptide Mr(calc): 1315.6256

Fixed modifications: Carbamidomethyl (C)

Ions Score: 62 Expect: 5.6e-005

Matches (Bold Red): 20/122 fragment ions using 53 most intense peaks

| #  | Immon.   | b               | b <sup>++</sup> | b <sup>*</sup> | b <sup>*++</sup> | b <sup>0</sup> | b <sup>0++</sup> | Seq. | y                | y <sup>++</sup> | y <sup>*</sup>  | y <sup>*++</sup> | y <sup>0</sup>   | y <sup>0++</sup> | #  |
|----|----------|-----------------|-----------------|----------------|------------------|----------------|------------------|------|------------------|-----------------|-----------------|------------------|------------------|------------------|----|
| 1  | 72.0808  | 100.0757        | 50.5415         |                |                  |                |                  | V    |                  |                 |                 |                  |                  |                  | 12 |
| 2  | 44.0495  | <b>171.1128</b> | 86.0600         |                |                  |                |                  | A    | <b>1217.5644</b> | 609.2859        | 1200.5379       | 600.7726         | 1199.5539        | 600.2806         | 11 |
| 3  | 102.0550 | <b>300.1554</b> | 150.5813        |                |                  | 282.1448       | 141.5761         | E    | <b>1146.5273</b> | 573.7673        | 1129.5008       | 565.2540         | <b>1128.5168</b> | 564.7620         | 10 |
| 4  | 72.0808  | <b>399.2238</b> | 200.1155        |                |                  | 381.2132       | 191.1103         | V    | <b>1017.4847</b> | 509.2460        | 1000.4582       | 500.7327         | 999.4742         | 500.2407         | 9  |
| 5  | 102.0550 | <b>528.2664</b> | 264.6368        |                |                  | 510.2558       | 255.6316         | E    | <b>918.4163</b>  | 459.7118        | 901.3898        | 451.1985         | <b>900.4058</b>  | 450.7065         | 8  |
| 6  | 30.0338  | 585.2879        | 293.1476        |                |                  | 567.2773       | 284.1423         | G    | <b>789.3737</b>  | 395.1905        | <b>772.3472</b> | 386.6772         | 771.3632         | 386.1852         | 7  |
| 7  | 102.0550 | <b>714.3305</b> | 357.6689        |                |                  | 696.3199       | 348.6636         | E    | <b>732.3523</b>  | 366.6798        | 715.3257        | 358.1665         | <b>714.3417</b>  | 357.6745         | 6  |
| 8  | 101.0709 | 842.3890        | 421.6982        | 825.3625       | 413.1849         | 824.3785       | 412.6929         | Q    | 603.3097         | 302.1585        | 586.2831        | 293.6452         | 585.2991         | 293.1532         | 5  |
| 9  | 72.0808  | 941.4575        | 471.2324        | 924.4309       | 462.7191         | 923.4469       | 462.2271         | V    | <b>475.2511</b>  | 238.1292        | 458.2245        | 229.6159         | 457.2405         | <b>229.1239</b>  | 4  |
| 10 | 88.0393  | 1056.4844       | 528.7458        | 1039.4578      | 520.2326         | 1038.4738      | 519.7406         | D    | <b>376.1827</b>  | 188.5950        | 359.1561        | 180.0817         | 358.1721         | 179.5897         | 3  |
| 11 | 87.0553  | 1170.5273       | 585.7673        | 1153.5008      | 577.2540         | 1152.5168      | 576.7620         | N    | <b>261.1557</b>  | 131.0815        | 244.1292        | 122.5682         |                  |                  | 2  |
| 12 | 101.1073 |                 |                 |                |                  |                |                  | K    | <b>147.1128</b>  | 74.0600         | 130.0863        | 65.5468          |                  |                  | 1  |

MS/MS Fragmentation of **YSNENLDLAR**

Found in **P36776**, P36776|LONM\_HUMAN Lon protease homolog, mitochondrial OS=Homo sapiens  
 GN=LONP1 PE=2 SV=2

Match to Query 543: 1193.503028 from(597.758790,2+)

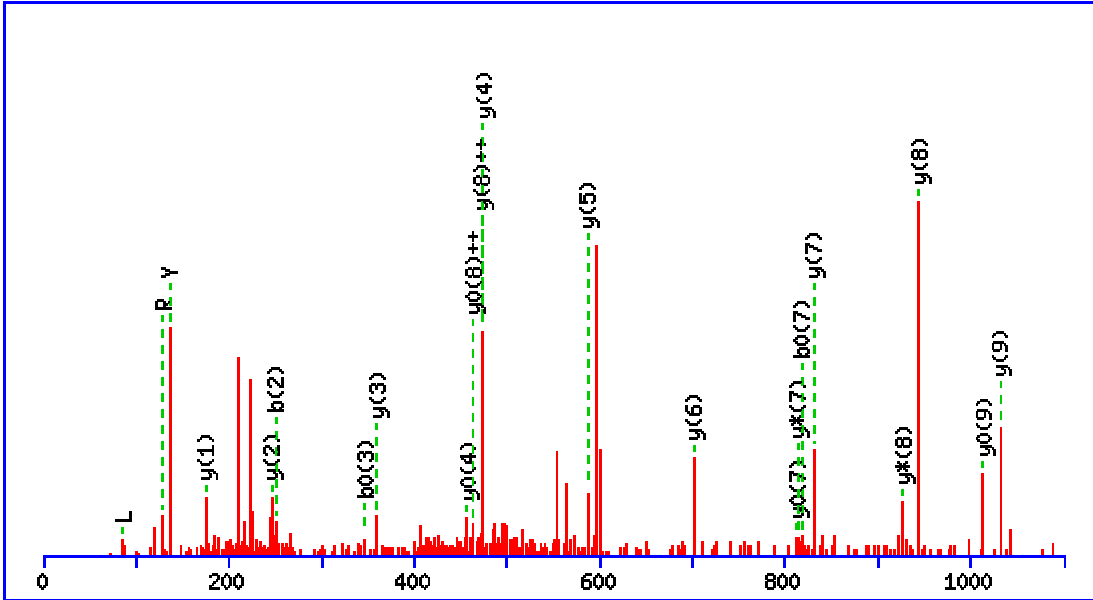

Monoisotopic mass of neutral peptide  $M_r(\text{calc})$ : 1193.5676

Fixed modifications: Carbamidomethyl (C)

Ions Score: 50 Expect: 0.00076

Matches (Bold Red): 23/106 fragment ions using 49 most intense peaks

| #  | Immon.          | b               | b <sup>++</sup> | b*        | b <sup>+++</sup> | b <sup>0</sup>  | b <sup>0++</sup> | Seq. | y                | y <sup>++</sup> | y*              | y <sup>+++</sup> | y <sup>0</sup>   | y <sup>0++</sup> | #  |
|----|-----------------|-----------------|-----------------|-----------|------------------|-----------------|------------------|------|------------------|-----------------|-----------------|------------------|------------------|------------------|----|
| 1  | <b>136.0757</b> | 164.0706        | 82.5389         |           |                  |                 |                  | Y    |                  |                 |                 |                  |                  |                  | 10 |
| 2  | 60.0444         | <b>251.1026</b> | 126.0550        |           |                  | 233.0921        | 117.0497         | S    | <b>1031.5116</b> | 516.2594        | 1014.4851       | 507.7462         | <b>1013.5010</b> | 507.2542         | 9  |
| 3  | 87.0553         | 365.1456        | 183.0764        | 348.1190  | 174.5631         | <b>347.1350</b> | 174.0711         | N    | <b>944.4796</b>  | <b>472.7434</b> | <b>927.4530</b> | 464.2302         | 926.4690         | <b>463.7381</b>  | 8  |
| 4  | 102.0550        | 494.1882        | 247.5977        | 477.1616  | 239.0844         | 476.1776        | 238.5924         | E    | <b>830.4367</b>  | 415.7220        | <b>813.4101</b> | 407.2087         | <b>812.4261</b>  | 406.7167         | 7  |
| 5  | 87.0553         | 608.2311        | 304.6192        | 591.2045  | 296.1059         | 590.2205        | 295.6139         | N    | <b>701.3941</b>  | 351.2007        | 684.3675        | 342.6874         | 683.3835         | 342.1954         | 6  |
| 6  | <b>86.0964</b>  | 721.3151        | 361.1612        | 704.2886  | 352.6479         | 703.3046        | 352.1559         | L    | <b>587.3511</b>  | 294.1792        | 570.3246        | 285.6659         | 569.3406         | 285.1739         | 5  |
| 7  | 88.0393         | 836.3421        | 418.6747        | 819.3155  | 410.1614         | <b>818.3315</b> | 409.6694         | D    | <b>474.2671</b>  | 237.6372        | 457.2405        | 229.1239         | <b>456.2565</b>  | 228.6319         | 4  |
| 8  | <b>86.0964</b>  | 949.4262        | 475.2167        | 932.3996  | 466.7034         | 931.4156        | 466.2114         | L    | <b>359.2401</b>  | 180.1237        | 342.2136        | 171.6104         |                  |                  | 3  |
| 9  | 44.0495         | 1020.4633       | 510.7353        | 1003.4367 | 502.2220         | 1002.4527       | 501.7300         | A    | <b>246.1561</b>  | 123.5817        | 229.1295        | 115.0684         |                  |                  | 2  |
| 10 | <b>129.1135</b> |                 |                 |           |                  |                 |                  | R    | <b>175.1190</b>  | 88.0631         | 158.0924        | 79.5498          |                  |                  | 1  |



MS/MS Fragmentation of **LTEPVVPK**

Found in **P11117**, P11117|PPAL\_HUMAN Lysosomal acid phosphatase OS=Homo sapiens GN=ACP2 PE=1 SV=3

Match to Query 116: 881.363092 from(441.688822,2+)

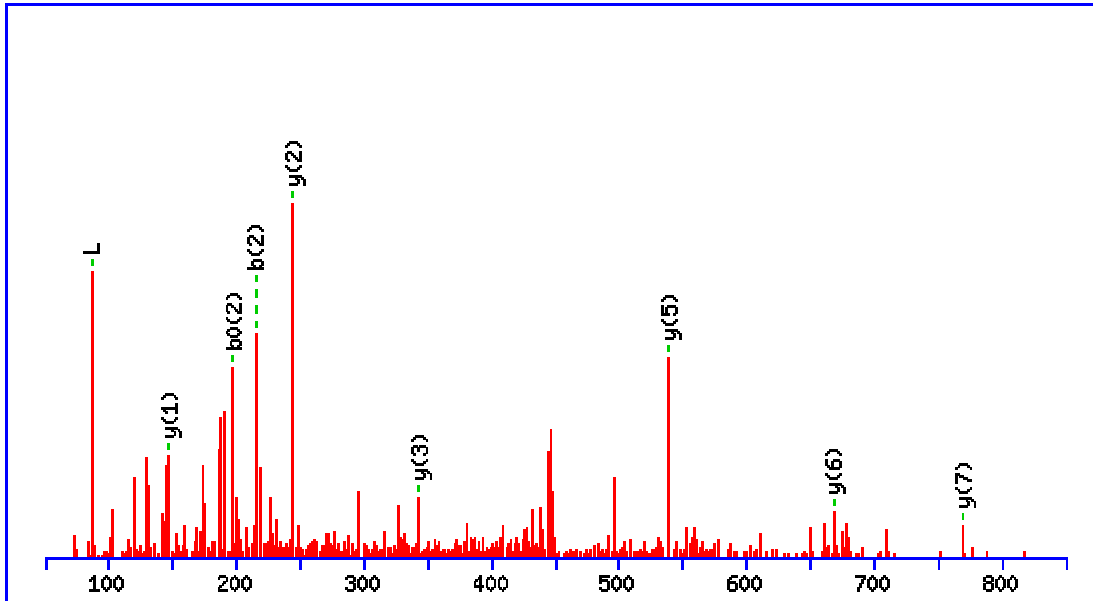

**Monoisotopic mass of neutral peptide Mr(calc): 881.5222**

**Fixed modifications:** Carbamidomethyl (C)

**Ions Score:** 38 **Expect:** 0.0095

**Matches (Bold Red):** 9/66 fragment ions using 20 most intense peaks

| # | Immon.         | b               | b <sup>++</sup> | b <sup>0</sup>  | b <sup>0++</sup> | Seq.     | y               | y <sup>++</sup> | y <sup>*</sup> | y <sup>*++</sup> | y <sup>0</sup> | y <sup>0++</sup> | # |
|---|----------------|-----------------|-----------------|-----------------|------------------|----------|-----------------|-----------------|----------------|------------------|----------------|------------------|---|
| 1 | <b>86.0964</b> | 114.0913        | 57.5493         |                 |                  | <b>L</b> |                 |                 |                |                  |                |                  | 8 |
| 2 | 74.0600        | <b>215.1390</b> | 108.0731        | <b>197.1285</b> | 99.0679          | <b>T</b> | <b>769.4454</b> | 385.2264        | 752.4189       | 376.7131         | 751.4349       | 376.2211         | 7 |
| 3 | 102.0550       | 344.1816        | 172.5944        | 326.1710        | 163.5892         | <b>E</b> | <b>668.3978</b> | 334.7025        | 651.3712       | 326.1892         | 650.3872       | 325.6972         | 6 |
| 4 | 70.0651        | 441.2344        | 221.1208        | 423.2238        | 212.1155         | <b>P</b> | <b>539.3552</b> | 270.1812        | 522.3286       | 261.6679         |                |                  | 5 |
| 5 | 72.0808        | 540.3028        | 270.6550        | 522.2922        | 261.6498         | <b>V</b> | 442.3024        | 221.6548        | 425.2758       | 213.1416         |                |                  | 4 |
| 6 | 72.0808        | 639.3712        | 320.1892        | 621.3606        | 311.1840         | <b>V</b> | <b>343.2340</b> | 172.1206        | 326.2074       | 163.6074         |                |                  | 3 |
| 7 | 70.0651        | 736.4240        | 368.7156        | 718.4134        | 359.7103         | <b>P</b> | <b>244.1656</b> | 122.5864        | 227.1390       | 114.0731         |                |                  | 2 |
| 8 | 101.1073       |                 |                 |                 |                  | <b>K</b> | <b>147.1128</b> | 74.0600         | 130.0863       | 65.5468          |                |                  | 1 |

MS/MS Fragmentation of **FVTLLYR**

Found in **P11117**, P11117|PPAL\_HUMAN Lysosomal acid phosphatase OS=Homo sapiens GN=ACP2 PE=1 SV=3

Match to Query 174: 910.472850 from(456.243701,2+)

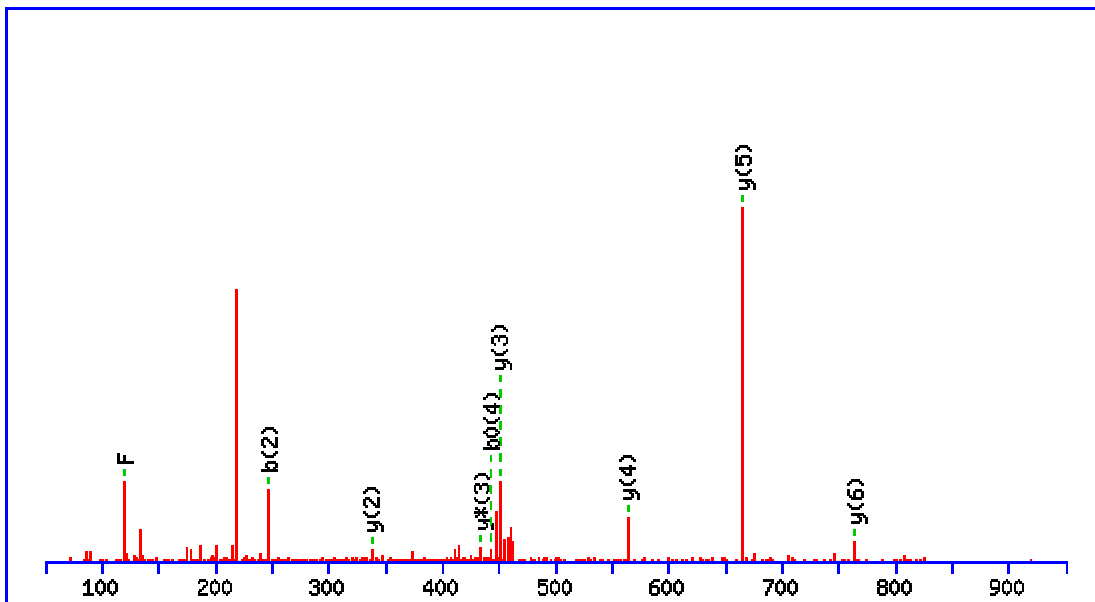

Monoisotopic mass of neutral peptide Mr(calc): 910.5276

Fixed modifications: Carbamidomethyl (C)

Ions Score: 42 Expect: 0.0042

Matches (Bold Red): 9/55 fragment ions using 14 most intense peaks

| # | Immon.          | b               | b <sup>++</sup> | b <sup>0</sup>  | b <sup>0++</sup> | Seq.     | y               | y <sup>++</sup> | y <sup>*</sup>  | y <sup>*++</sup> | y <sup>0</sup> | y <sup>0++</sup> | # |
|---|-----------------|-----------------|-----------------|-----------------|------------------|----------|-----------------|-----------------|-----------------|------------------|----------------|------------------|---|
| 1 | <b>120.0808</b> | 148.0757        | 74.5415         |                 |                  | <b>F</b> |                 |                 |                 |                  |                |                  | 7 |
| 2 | 72.0808         | <b>247.1441</b> | 124.0757        |                 |                  | <b>V</b> | <b>764.4665</b> | 382.7369        | 747.4400        | 374.2236         | 746.4559       | 373.7316         | 6 |
| 3 | 74.0600         | 348.1918        | 174.5995        | 330.1812        | 165.5942         | <b>T</b> | <b>665.3981</b> | 333.2027        | 648.3715        | 324.6894         | 647.3875       | 324.1974         | 5 |
| 4 | 86.0964         | 461.2758        | 231.1416        | <b>443.2653</b> | 222.1363         | <b>L</b> | <b>564.3504</b> | 282.6788        | 547.3239        | 274.1656         |                |                  | 4 |
| 5 | 86.0964         | 574.3599        | 287.6836        | 556.3493        | 278.6783         | <b>L</b> | <b>451.2663</b> | 226.1368        | <b>434.2398</b> | 217.6235         |                |                  | 3 |
| 6 | 136.0757        | 737.4232        | 369.2153        | 719.4127        | 360.2100         | <b>Y</b> | <b>338.1823</b> | 169.5948        | 321.1557        | 161.0815         |                |                  | 2 |
| 7 | 129.1135        |                 |                 |                 |                  | <b>R</b> | 175.1190        | 88.0631         | 158.0924        | 79.5498          |                |                  | 1 |

MS/MS Fragmentation of **VTSEGAGLQLQK**

Found in **P10253**, P10253|LYAG\_HUMAN Lysosomal alpha-glucosidase OS=Homo sapiens GN=GAA PE=1 SV=2

Match to Query 295: 1229.596230 from(615.805391,2+)

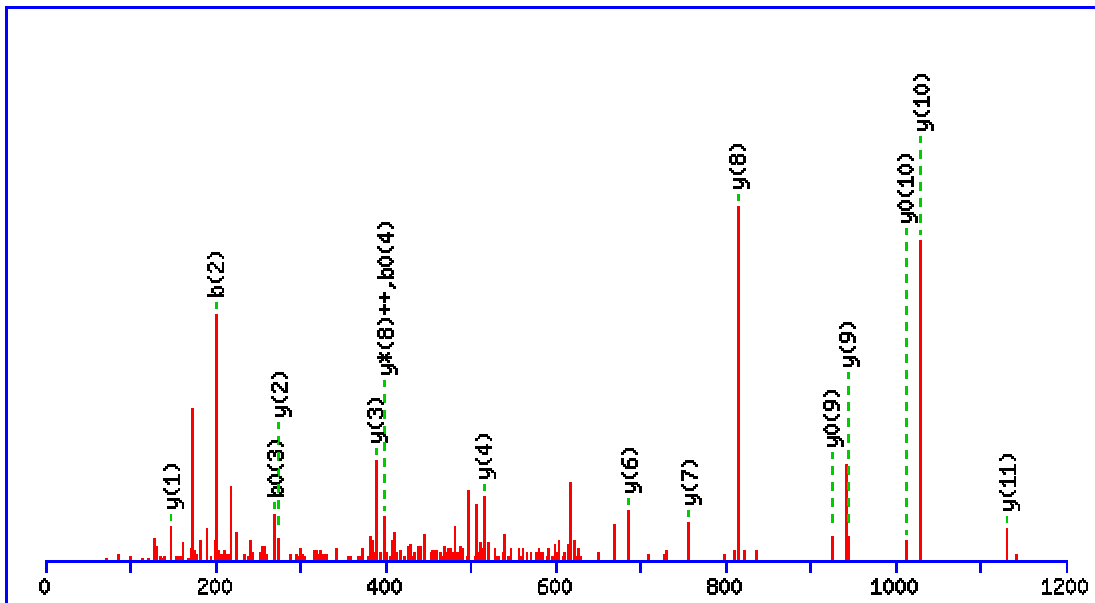

Monoisotopic mass of neutral peptide  $M_r(\text{calc})$ : 1229.6616

Fixed modifications: Carbamidomethyl (C)

Ions Score: 80 Expect: 8.1e-007

Matches (**Bold Red**): 16/110 fragment ions using 28 most intense peaks

| #  | Immon.   | b               | b <sup>++</sup> | b <sup>*</sup> | b <sup>*++</sup> | b <sup>0</sup>  | b <sup>0++</sup> | Seq. | y                | y <sup>++</sup> | y <sup>*</sup> | y <sup>*++</sup> | y <sup>0</sup>   | y <sup>0++</sup> | #  |
|----|----------|-----------------|-----------------|----------------|------------------|-----------------|------------------|------|------------------|-----------------|----------------|------------------|------------------|------------------|----|
| 1  | 72.0808  | 100.0757        | 50.5415         |                |                  |                 |                  | V    |                  |                 |                |                  |                  |                  | 12 |
| 2  | 74.0600  | <b>201.1234</b> | 101.0653        |                |                  | 183.1128        | 92.0600          | T    | <b>1131.6004</b> | 566.3039        | 1114.5739      | 557.7906         | 1113.5899        | 557.2986         | 11 |
| 3  | 60.0444  | 288.1554        | 144.5813        |                |                  | <b>270.1448</b> | 135.5761         | S    | <b>1030.5528</b> | 515.7800        | 1013.5262      | 507.2667         | <b>1012.5422</b> | 506.7747         | 10 |
| 4  | 102.0550 | 417.1980        | 209.1026        |                |                  | <b>399.1874</b> | 200.0974         | E    | <b>943.5207</b>  | 472.2640        | 926.4942       | 463.7507         | <b>925.5102</b>  | 463.2587         | 9  |
| 5  | 30.0338  | 474.2195        | 237.6134        |                |                  | 456.2089        | 228.6081         | G    | <b>814.4781</b>  | 407.7427        | 797.4516       | <b>399.2294</b>  |                  |                  | 8  |
| 6  | 44.0495  | 545.2566        | 273.1319        |                |                  | 527.2460        | 264.1266         | A    | <b>757.4567</b>  | 379.2320        | 740.4301       | 370.7187         |                  |                  | 7  |
| 7  | 30.0338  | 602.2780        | 301.6427        |                |                  | 584.2675        | 292.6374         | G    | <b>686.4196</b>  | 343.7134        | 669.3930       | 335.2001         |                  |                  | 6  |
| 8  | 86.0964  | 715.3621        | 358.1847        |                |                  | 697.3515        | 349.1794         | L    | 629.3981         | 315.2027        | 612.3715       | 306.6894         |                  |                  | 5  |
| 9  | 101.0709 | 843.4207        | 422.2140        | 826.3941       | 413.7007         | 825.4101        | 413.2087         | Q    | <b>516.3140</b>  | 258.6607        | 499.2875       | 250.1474         |                  |                  | 4  |
| 10 | 86.0964  | 956.5047        | 478.7560        | 939.4782       | 470.2427         | 938.4942        | 469.7507         | L    | <b>388.2554</b>  | 194.6314        | 371.2289       | 186.1181         |                  |                  | 3  |
| 11 | 101.0709 | 1084.5633       | 542.7853        | 1067.5368      | 534.2720         | 1066.5528       | 533.7800         | Q    | <b>275.1714</b>  | 138.0893        | 258.1448       | 129.5761         |                  |                  | 2  |
| 12 | 101.1073 |                 |                 |                |                  |                 |                  | K    | <b>147.1128</b>  | 74.0600         | 130.0863       | 65.5468          |                  |                  | 1  |

MS/MS Fragmentation of **NASDMPETTTSR**

Found in **Q8TCT9**, Q8TCT9|HM13\_HUMAN Minor histocompatibility antigen H13 OS=Homo sapiens  
GN=HM13 PE=1 SV=1

Match to Query 647: 1336.559834 from(669.287193,2+)

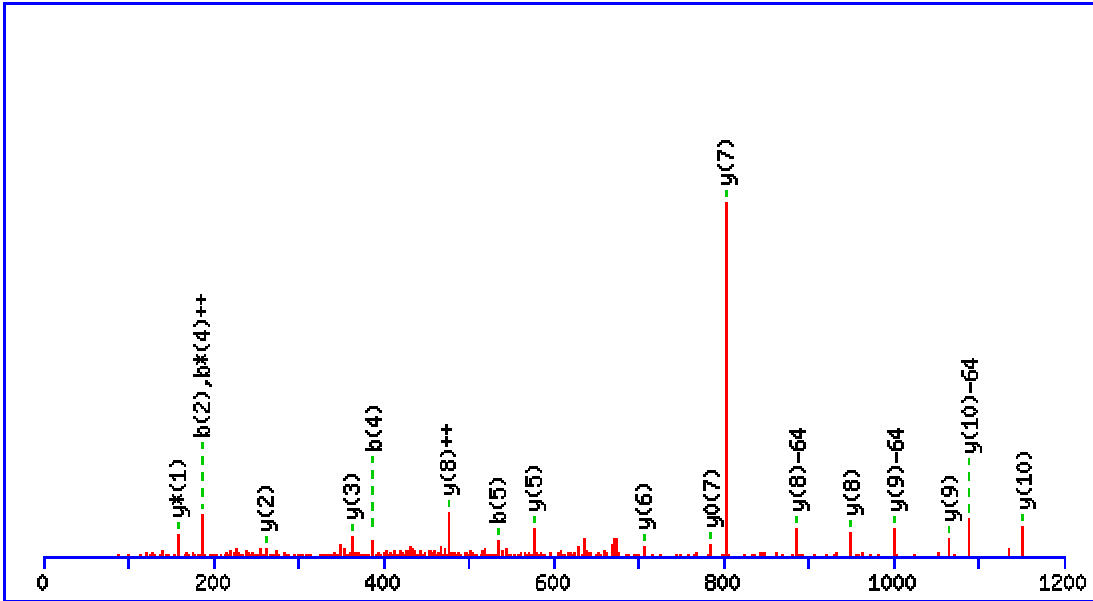

Monoisotopic mass of neutral peptide Mr(calc): 1336.5929

Fixed modifications: Carbamidomethyl (C)

Variable modifications:

M5 : Oxidation (M), with neutral losses 63.9983(shown in table), 0.0000

Ions Score: 68 Expect: 1.1e-005

Matches (**Bold Red**): 18/205 fragment ions using 22 most intense peaks

| #  | Immon.   | b               | b <sup>++</sup> | b <sup>*</sup> | b <sup>*++</sup> | b <sup>0</sup> | b <sup>0++</sup> | Seq. | y                | y <sup>++</sup> | y <sup>*</sup>  | y <sup>*++</sup> | y <sup>0</sup>  | y <sup>0++</sup> | #  |
|----|----------|-----------------|-----------------|----------------|------------------|----------------|------------------|------|------------------|-----------------|-----------------|------------------|-----------------|------------------|----|
| 1  | 87.0553  | 115.0502        | 58.0287         | 98.0237        | 49.5155          |                |                  | N    |                  |                 |                 |                  |                 |                  | 12 |
| 2  | 44.0495  | <b>186.0873</b> | 93.5473         | 169.0608       | 85.0340          |                |                  | A    | 1159.5590        | 580.2831        | 1142.5324       | 571.7698         | 1141.5484       | 571.2778         | 11 |
| 3  | 60.0444  | 273.1193        | 137.0633        | 256.0928       | 128.5500         | 255.1088       | 128.0580         | S    | <b>1088.5218</b> | 544.7646        | 1071.4953       | 536.2513         | 1070.5113       | 535.7593         | 10 |
| 4  | 88.0393  | <b>388.1463</b> | 194.5768        | 371.1197       | <b>186.0635</b>  | 370.1357       | 185.5715         | D    | <b>1001.4898</b> | 501.2485        | 984.4633        | 492.7353         | 983.4793        | 492.2433         | 9  |
| 5  | 56.0495  | 471.1834        | 236.0953        | 454.1569       | 227.5821         | 453.1728       | 227.0901         | M    | <b>886.4629</b>  | 443.7351        | 869.4363        | 435.2218         | 868.4523        | 434.7298         | 8  |
| 6  | 70.0651  | 568.2362        | 284.6217        | 551.2096       | 276.1084         | 550.2256       | 275.6164         | P    | <b>803.4258</b>  | 402.2165        | 786.3992        | 393.7032         | <b>785.4152</b> | 393.2112         | 7  |
| 7  | 102.0550 | 697.2788        | 349.1430        | 680.2522       | 340.6297         | 679.2682       | 340.1377         | E    | <b>706.3730</b>  | 353.6901        | 689.3464        | 345.1769         | 688.3624        | 344.6849         | 6  |
| 8  | 74.0600  | 798.3264        | 399.6669        | 781.2999       | 391.1536         | 780.3159       | 390.6616         | T    | <b>577.3304</b>  | 289.1688        | 560.3039        | 280.6556         | 559.3198        | 280.1636         | 5  |
| 9  | 86.0964  | 911.4105        | 456.2089        | 894.3840       | 447.6956         | 893.3999       | 447.2036         | I    | 476.2827         | 238.6450        | 459.2562        | 230.1317         | 458.2722        | 229.6397         | 4  |
| 10 | 74.0600  | 1012.4582       | 506.7327        | 995.4316       | 498.2195         | 994.4476       | 497.7274         | T    | <b>363.1987</b>  | 182.1030        | 346.1721        | 173.5897         | 345.1881        | 173.0977         | 3  |
| 11 | 60.0444  | 1099.4902       | 550.2487        | 1082.4637      | 541.7355         | 1081.4796      | 541.2435         | S    | <b>262.1510</b>  | 131.5791        | 245.1244        | 123.0659         | 244.1404        | 122.5738         | 2  |
| 12 | 129.1135 |                 |                 |                |                  |                |                  | R    | 175.1190         | 88.0631         | <b>158.0924</b> | 79.5498          |                 |                  | 1  |

MS/MS Fragmentation of **LQMEQQQLQQR**

Found in **Q9NS69**, Q9NS69|TOM22\_HUMAN Mitochondrial import receptor subunit TOM22 homolog  
 OS=Homo sapiens GN=TOMM22 PE=1 SV=3

Match to Query 462: 1572.794704 from(787.404628,2+)

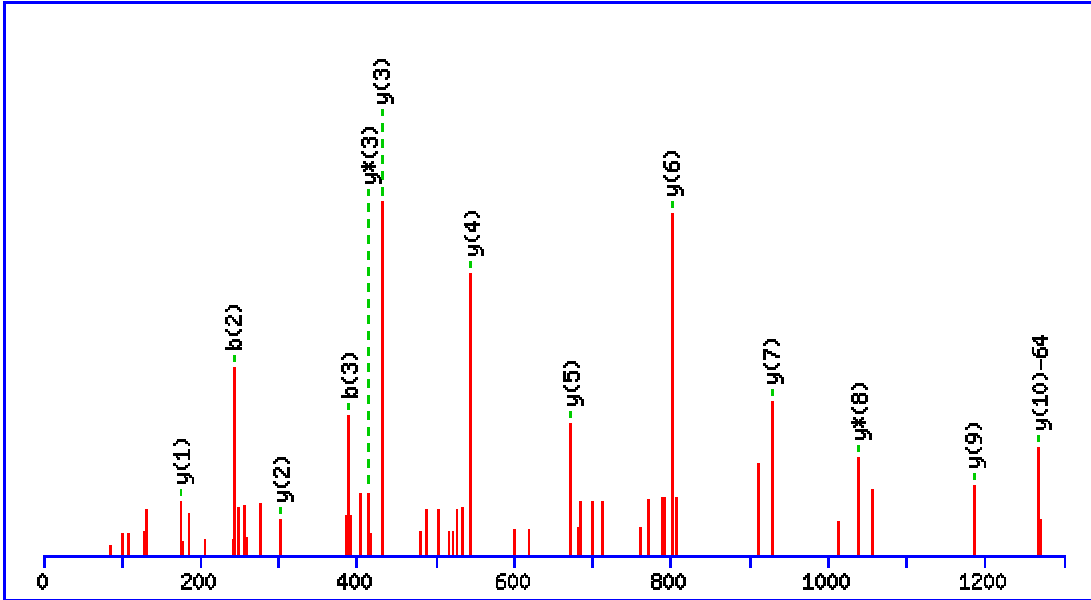

**Monoisotopic mass of neutral peptide Mr(calc):** 1572.7678

**Fixed modifications:** Carbamidomethyl (C)

**Variable modifications:**

**M3** : Oxidation (M), with neutral losses 63.9983(shown in table), 0.0000

**Ions Score:** 84 **Expect:** 2.8e-007

**Matches (Bold Red):** 13/185 fragment ions using 24 most intense peaks

| #  | Immon.   | b               | b <sup>++</sup> | b <sup>*</sup> | b <sup>*++</sup> | b <sup>0</sup> | b <sup>0++</sup> | Seq. | y                | y <sup>++</sup> | y <sup>*</sup>   | y <sup>*++</sup> | y <sup>0</sup> | y <sup>0++</sup> | #  |
|----|----------|-----------------|-----------------|----------------|------------------|----------------|------------------|------|------------------|-----------------|------------------|------------------|----------------|------------------|----|
| 1  | 86.0964  | 114.0913        | 57.5493         |                |                  |                |                  | L    |                  |                 |                  |                  |                |                  | 12 |
| 2  | 101.0709 | <b>242.1499</b> | 121.5786        | 225.1234       | 113.0653         |                |                  | Q    | 1396.6928        | 698.8500        | 1379.6662        | 690.3368         | 1378.6822      | 689.8447         | 11 |
| 3  | 56.0495  | 325.1870        | 163.0972        | 308.1605       | 154.5839         |                |                  | M    | <b>1268.6342</b> | 634.8207        | 1251.6076        | 626.3075         | 1250.6236      | 625.8155         | 10 |
| 4  | 102.0550 | 454.2296        | 227.6185        | 437.2031       | 219.1052         | 436.2191       | 218.6132         | E    | <b>1185.5971</b> | 593.3022        | 1168.5705        | 584.7889         | 1167.5865      | 584.2969         | 9  |
| 5  | 101.0709 | 582.2882        | 291.6477        | 565.2617       | 283.1345         | 564.2776       | 282.6425         | Q    | 1056.5545        | 528.7809        | <b>1039.5279</b> | 520.2676         |                |                  | 8  |
| 6  | 101.0709 | 710.3468        | 355.6770        | 693.3202       | 347.1638         | 692.3362       | 346.6717         | Q    | <b>928.4959</b>  | 464.7516        | 911.4694         | 456.2383         |                |                  | 7  |
| 7  | 101.0709 | 838.4054        | 419.7063        | 821.3788       | 411.1930         | 820.3948       | 410.7010         | Q    | <b>800.4373</b>  | 400.7223        | 783.4108         | 392.2090         |                |                  | 6  |
| 8  | 101.0709 | 966.4639        | 483.7356        | 949.4374       | 475.2223         | 948.4534       | 474.7303         | Q    | <b>672.3788</b>  | 336.6930        | 655.3522         | 328.1797         |                |                  | 5  |
| 9  | 86.0964  | 1079.5480       | 540.2776        | 1062.5215      | 531.7644         | 1061.5374      | 531.2724         | L    | <b>544.3202</b>  | 272.6637        | 527.2936         | 264.1504         |                |                  | 4  |
| 10 | 101.0709 | 1207.6066       | 604.3069        | 1190.5800      | 595.7937         | 1189.5960      | 595.3016         | Q    | <b>431.2361</b>  | 216.1217        | <b>414.2096</b>  | 207.6084         |                |                  | 3  |
| 11 | 101.0709 | 1335.6652       | 668.3362        | 1318.6386      | 659.8229         | 1317.6546      | 659.3309         | Q    | <b>303.1775</b>  | 152.0924        | 286.1510         | 143.5791         |                |                  | 2  |
| 12 | 129.1135 |                 |                 |                |                  |                |                  | R    | <b>175.1190</b>  | 88.0631         | 158.0924         | 79.5498          |                |                  | 1  |

MS/MS Fragmentation of **SEFEQNLSEK**

Found in **Q16891**, Q16891|IMMT\_HUMAN Mitochondrial inner membrane protein OS=Homo sapiens  
GN=IMMT PE=1 SV=1

Match to Query 369: 1209.560048 from(605.787300,2+)

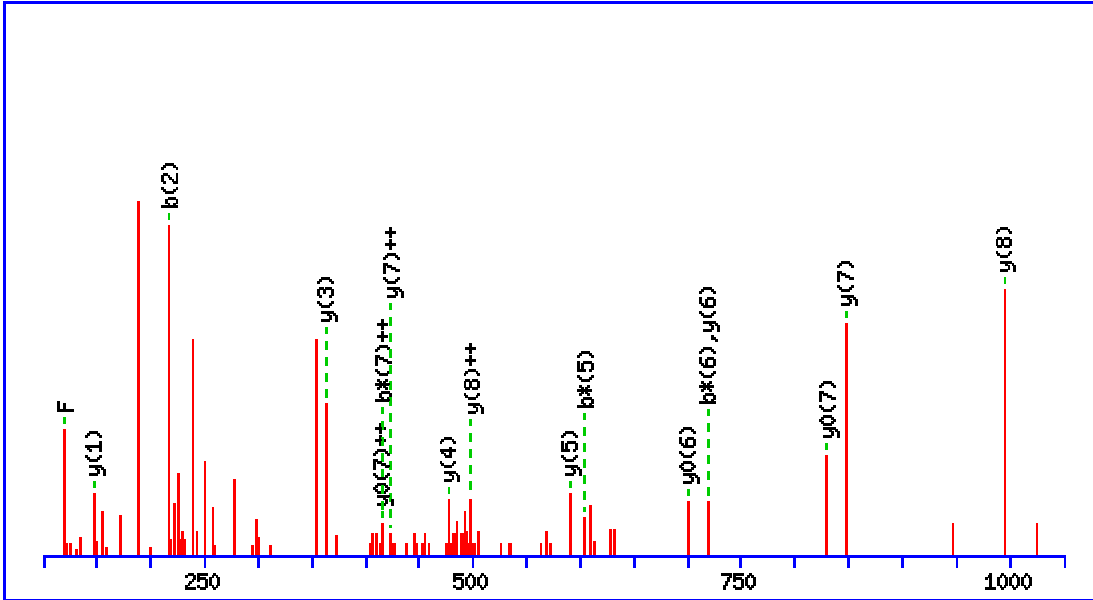

Monoisotopic mass of neutral peptide Mr(calc): 1209.5513

Fixed modifications: Carbamidomethyl (C)

Ions Score: 35 Expect: 0.024

Matches (**Bold Red**): 17/108 fragment ions using 32 most intense peaks

| #  | Immon.          | b               | b <sup>++</sup> | b*              | b <sup>+++</sup> | b <sup>0</sup> | b <sup>++</sup> | Seq. | y               | y <sup>++</sup> | y*        | y <sup>+++</sup> | y <sup>0</sup>  | y <sup>0++</sup> | #  |
|----|-----------------|-----------------|-----------------|-----------------|------------------|----------------|-----------------|------|-----------------|-----------------|-----------|------------------|-----------------|------------------|----|
| 1  | 60.0444         | 88.0393         | 44.5233         |                 |                  | 70.0287        | 35.5180         | S    |                 |                 |           |                  |                 |                  | 10 |
| 2  | 102.0550        | <b>217.0819</b> | 109.0446        |                 |                  | 199.0713       | 100.0393        | E    | 1123.5266       | 562.2669        | 1106.5000 | 553.7537         | 1105.5160       | 553.2617         | 9  |
| 3  | <b>120.0808</b> | 364.1503        | 182.5788        |                 |                  | 346.1397       | 173.5735        | F    | <b>994.4840</b> | <b>497.7456</b> | 977.4575  | 489.2324         | 976.4734        | 488.7404         | 8  |
| 4  | 102.0550        | 493.1929        | 247.1001        |                 |                  | 475.1823       | 238.0948        | E    | <b>847.4156</b> | <b>424.2114</b> | 830.3890  | 415.6982         | <b>829.4050</b> | <b>415.2061</b>  | 7  |
| 5  | 101.0709        | 621.2515        | 311.1294        | <b>604.2249</b> | 302.6161         | 603.2409       | 302.1241        | Q    | <b>718.3730</b> | 359.6901        | 701.3464  | 351.1769         | <b>700.3624</b> | 350.6849         | 6  |
| 6  | 87.0553         | 735.2944        | 368.1508        | <b>718.2679</b> | 359.6376         | 717.2838       | 359.1456        | N    | <b>590.3144</b> | 295.6608        | 573.2879  | 287.1476         | 572.3039        | 286.6556         | 5  |
| 7  | 86.0964         | 848.3785        | 424.6929        | 831.3519        | <b>416.1796</b>  | 830.3679       | 415.6876        | L    | <b>476.2715</b> | 238.6394        | 459.2449  | 230.1261         | 458.2609        | 229.6341         | 4  |
| 8  | 60.0444         | 935.4105        | 468.2089        | 918.3840        | 459.6956         | 917.3999       | 459.2036        | S    | <b>363.1874</b> | 182.0974        | 346.1609  | 173.5841         | 345.1769        | 173.0921         | 3  |
| 9  | 102.0550        | 1064.4531       | 532.7302        | 1047.4265       | 524.2169         | 1046.4425      | 523.7249        | E    | 276.1554        | 138.5813        | 259.1288  | 130.0681         | 258.1448        | 129.5761         | 2  |
| 10 | 101.1073        |                 |                 |                 |                  |                |                 | K    | <b>147.1128</b> | 74.0600         | 130.0863  | 65.5468          |                 |                  | 1  |

MS/MS Fragmentation of **AFQNVFAPR**

Found in **P15586**, P15586|GNS\_HUMAN N-acetylglucosamine-6-sulfatase OS=Homo sapiens GN=GNS PE=1 SV=3

Match to Query 277: 1048.660214 from(525.337383,2+)

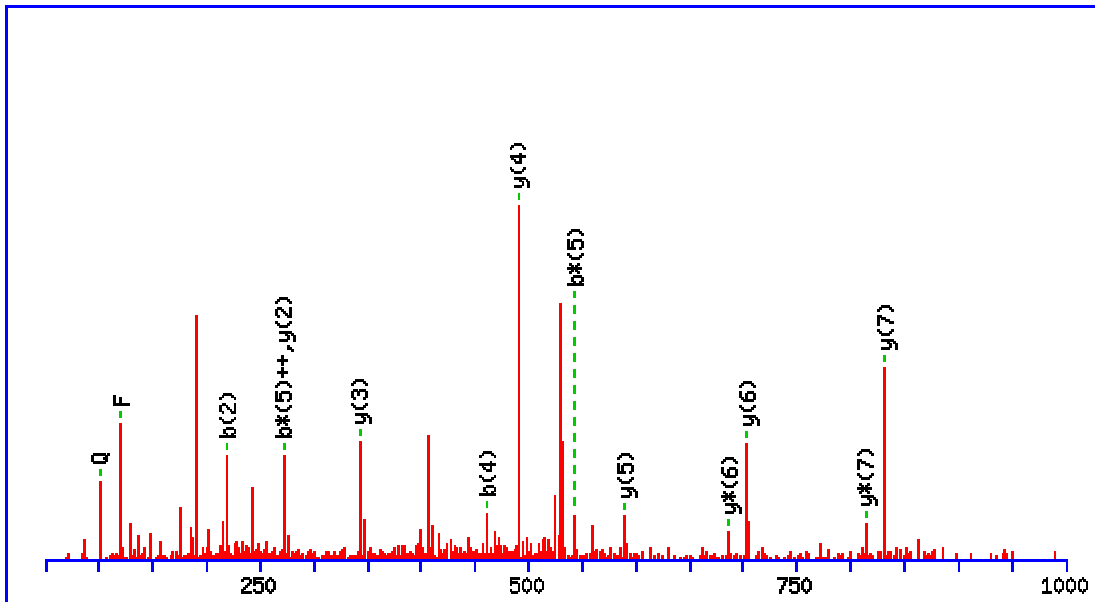

Monoisotopic mass of neutral peptide  $M_r(\text{calc})$ : 1048.5454

Fixed modifications: Carbamidomethyl (C)

Ions Score: 37 Expect: 0.014

Matches (**Bold Red**): 15/69 fragment ions using 27 most intense peaks

| # | Immon.          | b               | b <sup>++</sup> | b*              | b <sup>***</sup> | Seq. | y               | y <sup>++</sup> | y*              | y <sup>***</sup> | # |
|---|-----------------|-----------------|-----------------|-----------------|------------------|------|-----------------|-----------------|-----------------|------------------|---|
| 1 | 44.0495         | 72.0444         | 36.5258         |                 |                  | A    |                 |                 |                 |                  | 9 |
| 2 | <b>120.0808</b> | <b>219.1128</b> | 110.0600        |                 |                  | F    | 978.5156        | 489.7614        | 961.4890        | 481.2482         | 8 |
| 3 | <b>101.0709</b> | 347.1714        | 174.0893        | 330.1448        | 165.5761         | Q    | <b>831.4472</b> | 416.2272        | <b>814.4206</b> | 407.7139         | 7 |
| 4 | 87.0553         | <b>461.2143</b> | 231.1108        | 444.1878        | 222.5975         | N    | <b>703.3886</b> | 352.1979        | <b>686.3620</b> | 343.6847         | 6 |
| 5 | 72.0808         | 560.2827        | 280.6450        | <b>543.2562</b> | <b>272.1317</b>  | V    | <b>589.3457</b> | 295.1765        | 572.3191        | 286.6632         | 5 |
| 6 | <b>120.0808</b> | 707.3511        | 354.1792        | 690.3246        | 345.6659         | F    | <b>490.2772</b> | 245.6423        | 473.2507        | 237.1290         | 4 |
| 7 | 44.0495         | 778.3883        | 389.6978        | 761.3617        | 381.1845         | A    | <b>343.2088</b> | 172.1081        | 326.1823        | 163.5948         | 3 |
| 8 | 70.0651         | 875.4410        | 438.2241        | 858.4145        | 429.7109         | P    | <b>272.1717</b> | 136.5895        | 255.1452        | 128.0762         | 2 |
| 9 | 129.1135        |                 |                 |                 |                  | R    | 175.1190        | 88.0631         | 158.0924        | 79.5498          | 1 |

MS/MS Fragmentation of **QEILAALEK**

Found in **P07602**, P07602|SAP\_HUMAN Proactivator polypeptide OS=Homo sapiens GN=PSAP PE=1 SV=2

Match to Query 145: 1013.413896 from(507.714224,2+)

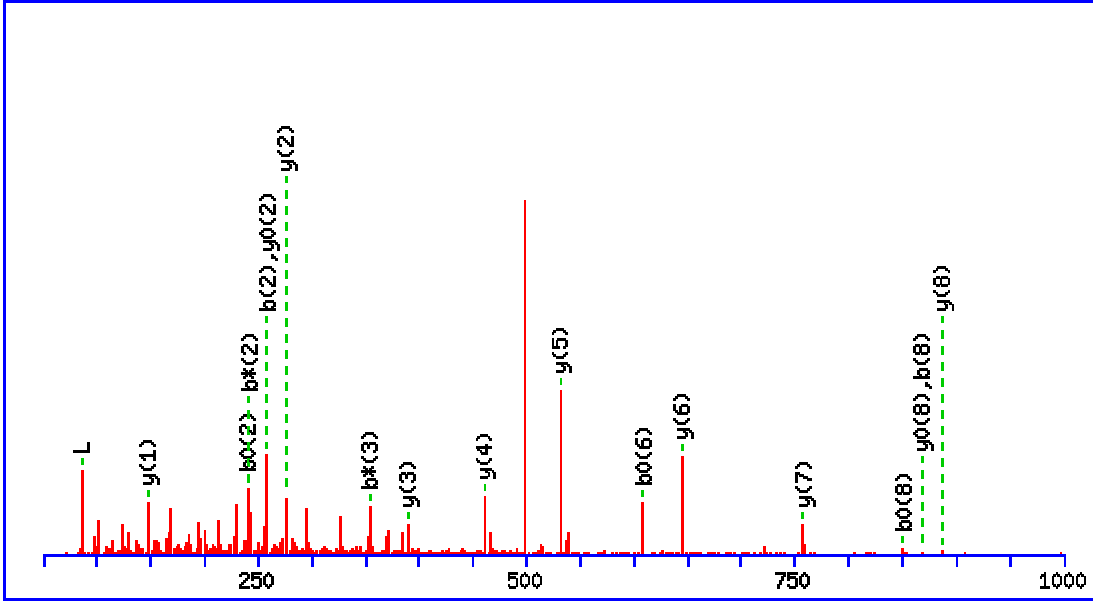

Monoisotopic mass of neutral peptide  $M_r(\text{calc})$ : 1013.5757

Fixed modifications: Carbamidomethyl (C)

Ions Score: 83 Expect: 3.8e-007

Matches (Bold Red): 20/101 fragment ions using 20 most intense peaks

| # | Immon.         | b               | b <sup>++</sup> | b*              | b <sup>*++</sup> | b <sup>0</sup>  | b <sup>0++</sup> | Seq. | y               | y <sup>++</sup> | y*       | y <sup>*++</sup> | y <sup>0</sup>  | y <sup>0++</sup> | # |
|---|----------------|-----------------|-----------------|-----------------|------------------|-----------------|------------------|------|-----------------|-----------------|----------|------------------|-----------------|------------------|---|
| 1 | 101.0709       | 129.0659        | 65.0366         | 112.0393        | 56.5233          |                 |                  | Q    |                 |                 |          |                  |                 |                  | 9 |
| 2 | 102.0550       | <b>258.1084</b> | 129.5579        | <b>241.0819</b> | 121.0446         | <b>240.0979</b> | 120.5526         | E    | <b>886.5244</b> | 443.7658        | 869.4979 | 435.2526         | <b>868.5138</b> | 434.7606         | 8 |
| 3 | <b>86.0964</b> | 371.1925        | 186.0999        | <b>354.1660</b> | 177.5866         | 353.1819        | 177.0946         | I    | <b>757.4818</b> | 379.2445        | 740.4553 | 370.7313         | 739.4713        | 370.2393         | 7 |
| 4 | <b>86.0964</b> | 484.2766        | 242.6419        | 467.2500        | 234.1287         | 466.2660        | 233.6366         | L    | <b>644.3978</b> | 322.7025        | 627.3712 | 314.1892         | 626.3872        | 313.6972         | 6 |
| 5 | 44.0495        | 555.3137        | 278.1605        | 538.2871        | 269.6472         | 537.3031        | 269.1552         | A    | <b>531.3137</b> | 266.1605        | 514.2871 | 257.6472         | 513.3031        | 257.1552         | 5 |
| 6 | 44.0495        | 626.3508        | 313.6790        | 609.3243        | 305.1658         | <b>608.3402</b> | 304.6738         | A    | <b>460.2766</b> | 230.6419        | 443.2500 | 222.1287         | 442.2660        | 221.6366         | 4 |
| 7 | <b>86.0964</b> | 739.4349        | 370.2211        | 722.4083        | 361.7078         | 721.4243        | 361.2158         | L    | <b>389.2395</b> | 195.1234        | 372.2129 | 186.6101         | 371.2289        | 186.1181         | 3 |
| 8 | 102.0550       | <b>868.4775</b> | 434.7424        | 851.4509        | 426.2291         | <b>850.4669</b> | 425.7371         | E    | <b>276.1554</b> | 138.5813        | 259.1288 | 130.0681         | <b>258.1448</b> | 129.5761         | 2 |
| 9 | 101.1073       |                 |                 |                 |                  |                 |                  | K    | <b>147.1128</b> | 74.0600         | 130.0863 | 65.5468          |                 |                  | 1 |



MS/MS Fragmentation of **LGPGMADICK**

Found in **P07602**, P07602|SAP\_HUMAN Proactivator polypeptide OS=Homo sapiens GN=PSAP PE=1 SV=2

Match to Query 421: 1076.473922 from(539.244237,2+)

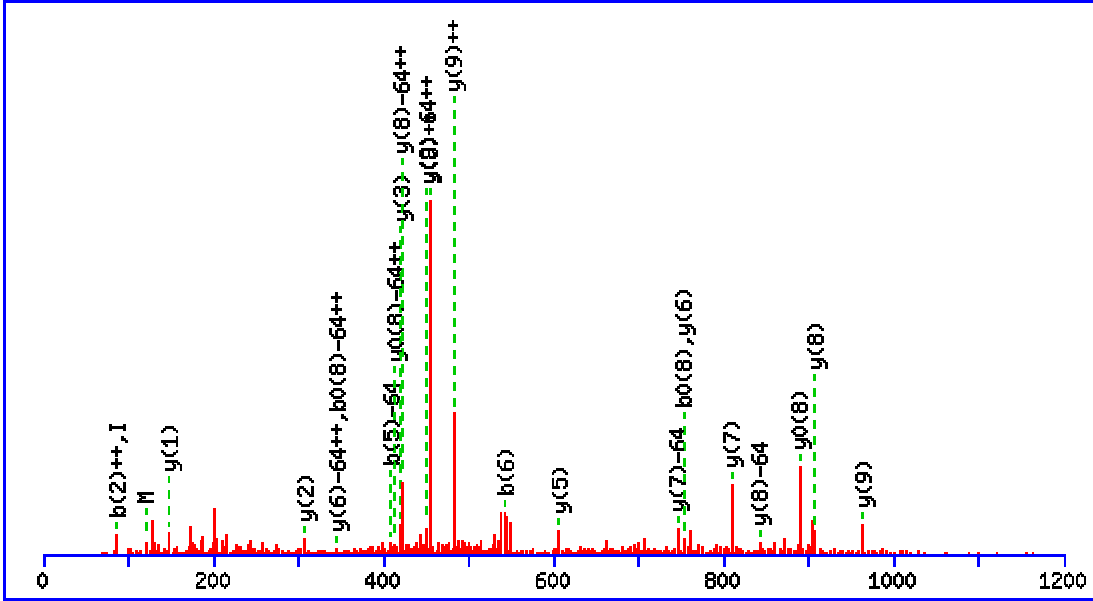

Monoisotopic mass of neutral peptide Mr(calc): 1076.4995

Fixed modifications: Carbamidomethyl (C)

Variable modifications:

M5 : Oxidation (M), with neutral losses 0.0000(shown in table), 63.9983

Ions Score: 38 Expect: 0.013

Matches (Bold Red): 25/123 fragment ions using 57 most intense peaks

| #  | Immon.          | b               | b <sup>++</sup> | b <sup>0</sup>  | b <sup>0++</sup> | Seq. | y               | y <sup>++</sup> | y <sup>*</sup> | y <sup>*++</sup> | y <sup>0</sup>  | y <sup>0++</sup> | #  |
|----|-----------------|-----------------|-----------------|-----------------|------------------|------|-----------------|-----------------|----------------|------------------|-----------------|------------------|----|
| 1  | <b>86.0964</b>  | 114.0913        | 57.5493         |                 |                  | L    |                 |                 |                |                  |                 |                  | 10 |
| 2  | 30.0338         | 171.1128        | <b>86.0600</b>  |                 |                  | G    | <b>964.4227</b> | <b>482.7150</b> | 947.3961       | 474.2017         | 946.4121        | 473.7097         | 9  |
| 3  | 70.0651         | 268.1656        | 134.5864        |                 |                  | P    | <b>907.4012</b> | <b>454.2042</b> | 890.3747       | 445.6910         | <b>889.3906</b> | 445.1990         | 8  |
| 4  | 30.0338         | 325.1870        | 163.0972        |                 |                  | G    | <b>810.3484</b> | 405.6779        | 793.3219       | 397.1646         | 792.3379        | 396.6726         | 7  |
| 5  | <b>120.0478</b> | 472.2224        | 236.6149        |                 |                  | M    | <b>753.3270</b> | 377.1671        | 736.3004       | 368.6539         | 735.3164        | 368.1618         | 6  |
| 6  | 44.0495         | <b>543.2595</b> | 272.1334        |                 |                  | A    | <b>606.2916</b> | 303.6494        | 589.2650       | 295.1362         | 588.2810        | 294.6441         | 5  |
| 7  | 88.0393         | 658.2865        | 329.6469        | 640.2759        | 320.6416         | D    | 535.2545        | 268.1309        | 518.2279       | 259.6176         | 517.2439        | 259.1256         | 4  |
| 8  | <b>86.0964</b>  | 771.3706        | 386.1889        | <b>753.3600</b> | 377.1836         | I    | <b>420.2275</b> | 210.6174        | 403.2010       | 202.1041         |                 |                  | 3  |
| 9  | 133.0430        | 931.4012        | 466.2042        | 913.3906        | 457.1990         | C    | <b>307.1435</b> | 154.0754        | 290.1169       | 145.5621         |                 |                  | 2  |
| 10 | 101.1073        |                 |                 |                 |                  | K    | <b>147.1128</b> | 74.0600         | 130.0863       | 65.5468          |                 |                  | 1  |

MS/MS Fragmentation of **LIPGSNLDSEPR**

Found in **Q6P4E1**, Q6P4E1|CASC4\_HUMAN Protein CASC4 OS=Homo sapiens GN=CASC4 PE=2 SV=1

Match to Query 342: 1296.614988 from(649.314770,2+)

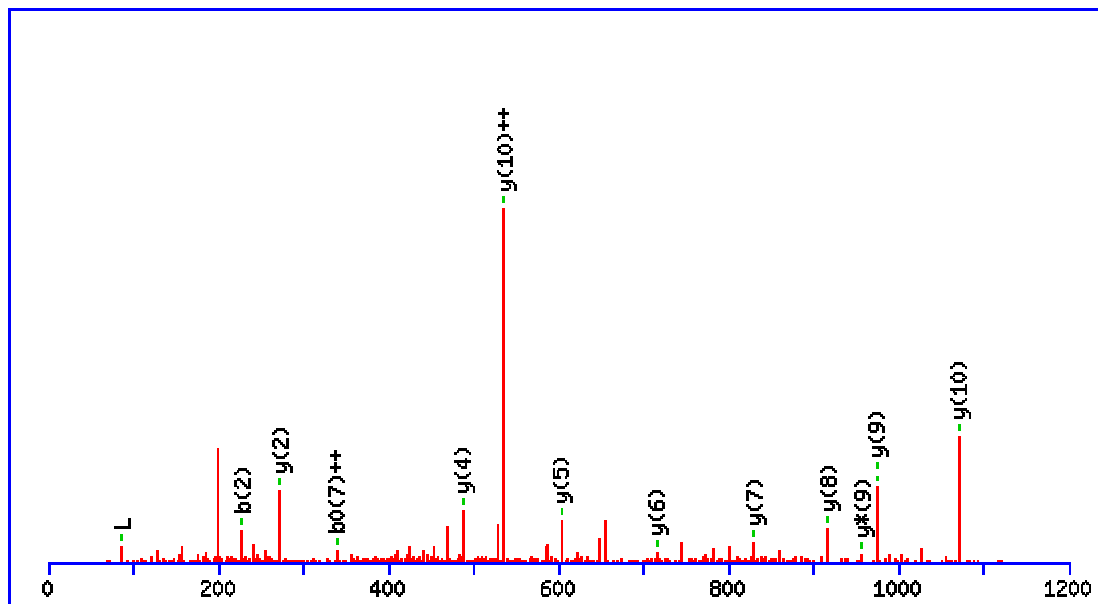

Monoisotopic mass of neutral peptide Mr(calc): 1296.6674

Fixed modifications: Carbamidomethyl (C)

Ions Score: 51 Expect: 0.00057

Matches (Bold Red): 15/122 fragment ions using 24 most intense peaks

| #         | Immon.         | b               | b <sup>++</sup> | b <sup>*</sup> | b <sup>*++</sup> | b <sup>0</sup> | b <sup>0++</sup> | Seq.     | y                | y <sup>++</sup> | y <sup>*</sup>  | y <sup>*++</sup> | y <sup>0</sup> | y <sup>0++</sup> | #         |
|-----------|----------------|-----------------|-----------------|----------------|------------------|----------------|------------------|----------|------------------|-----------------|-----------------|------------------|----------------|------------------|-----------|
| <b>1</b>  | <b>86.0964</b> | 114.0913        | 57.5493         |                |                  |                |                  | <b>L</b> |                  |                 |                 |                  |                |                  | <b>12</b> |
| <b>2</b>  | <b>86.0964</b> | <b>227.1754</b> | 114.0913        |                |                  |                |                  | <b>I</b> | 1184.5906        | 592.7989        | 1167.5640       | 584.2857         | 1166.5800      | 583.7937         | <b>11</b> |
| <b>3</b>  | 70.0651        | 324.2282        | 162.6177        |                |                  |                |                  | <b>P</b> | <b>1071.5065</b> | <b>536.2569</b> | 1054.4800       | 527.7436         | 1053.4960      | 527.2516         | <b>10</b> |
| <b>4</b>  | 30.0338        | 381.2496        | 191.1285        |                |                  |                |                  | <b>G</b> | <b>974.4538</b>  | 487.7305        | <b>957.4272</b> | 479.2172         | 956.4432       | 478.7252         | <b>9</b>  |
| <b>5</b>  | 60.0444        | 468.2817        | 234.6445        |                |                  | 450.2711       | 225.6392         | <b>S</b> | <b>917.4323</b>  | 459.2198        | 900.4058        | 450.7065         | 899.4217       | 450.2145         | <b>8</b>  |
| <b>6</b>  | 87.0553        | 582.3246        | 291.6659        | 565.2980       | 283.1527         | 564.3140       | 282.6606         | <b>N</b> | <b>830.4003</b>  | 415.7038        | 813.3737        | 407.1905         | 812.3897       | 406.6985         | <b>7</b>  |
| <b>7</b>  | <b>86.0964</b> | 695.4087        | 348.2080        | 678.3821       | 339.6947         | 677.3981       | <b>339.2027</b>  | <b>L</b> | <b>716.3573</b>  | 358.6823        | 699.3308        | 350.1690         | 698.3468       | 349.6770         | <b>6</b>  |
| <b>8</b>  | 88.0393        | 810.4356        | 405.7214        | 793.4090       | 397.2082         | 792.4250       | 396.7162         | <b>D</b> | <b>603.2733</b>  | 302.1403        | 586.2467        | 293.6270         | 585.2627       | 293.1350         | <b>5</b>  |
| <b>9</b>  | 60.0444        | 897.4676        | 449.2374        | 880.4411       | 440.7242         | 879.4571       | 440.2322         | <b>S</b> | <b>488.2463</b>  | 244.6268        | 471.2198        | 236.1135         | 470.2358       | 235.6215         | <b>4</b>  |
| <b>10</b> | 102.0550       | 1026.5102       | 513.7587        | 1009.4837      | 505.2455         | 1008.4997      | 504.7535         | <b>E</b> | 401.2143         | 201.1108        | 384.1878        | 192.5975         | 383.2037       | 192.1055         | <b>3</b>  |
| <b>11</b> | 70.0651        | 1123.5630       | 562.2851        | 1106.5364      | 553.7719         | 1105.5524      | 553.2798         | <b>P</b> | <b>272.1717</b>  | 136.5895        | 255.1452        | 128.0762         |                |                  | <b>2</b>  |
| <b>12</b> | 129.1135       |                 |                 |                |                  |                |                  | <b>R</b> | 175.1190         | 88.0631         | 158.0924        | 79.5498          |                |                  | <b>1</b>  |

MS/MS Fragmentation of **APLVLKD**

Found in **Q99497**, Q99497|PARK7\_HUMAN Protein DJ-1 OS=Homo sapiens GN=PARK7 PE=1 SV=2

Match to Query 44: 754.435238 from(378.224895,2+)

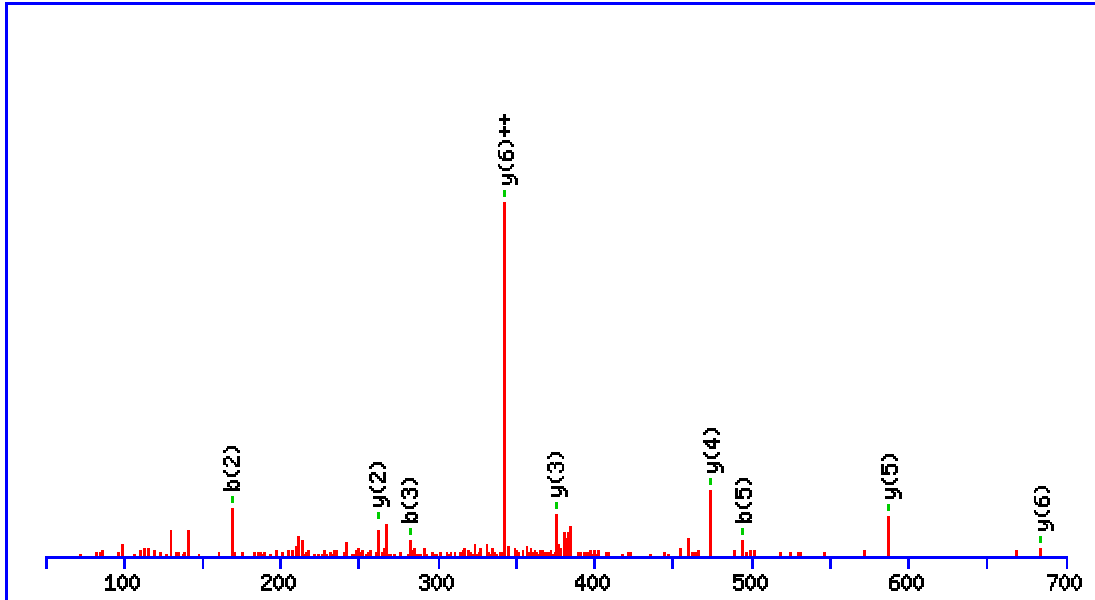

| # | Immon.   | b               | b <sup>++</sup> | b <sup>*</sup> | b <sup>*++</sup> | Seq. | y               | y <sup>++</sup> | y <sup>*</sup> | y <sup>*++</sup> | y <sup>0</sup> | y <sup>0++</sup> | # |
|---|----------|-----------------|-----------------|----------------|------------------|------|-----------------|-----------------|----------------|------------------|----------------|------------------|---|
| 1 | 44.0495  | 72.0444         | 36.5258         |                |                  | A    |                 |                 |                |                  |                |                  | 7 |
| 2 | 70.0651  | <b>169.0972</b> | 85.0522         |                |                  | P    | <b>684.4291</b> | <b>342.7182</b> | 667.4025       | 334.2049         | 666.4185       | 333.7129         | 6 |
| 3 | 86.0964  | <b>282.1812</b> | 141.5942        |                |                  | L    | <b>587.3763</b> | 294.1918        | 570.3497       | 285.6785         | 569.3657       | 285.1865         | 5 |
| 4 | 72.0808  | 381.2496        | 191.1285        |                |                  | V    | <b>474.2922</b> | 237.6498        | 457.2657       | 229.1365         | 456.2817       | 228.6445         | 4 |
| 5 | 86.0964  | <b>494.3337</b> | 247.6705        |                |                  | L    | <b>375.2238</b> | 188.1155        | 358.1973       | 179.6023         | 357.2132       | 179.1103         | 3 |
| 6 | 101.1073 | 622.4287        | 311.7180        | 605.4021       | 303.2047         | K    | <b>262.1397</b> | 131.5735        | 245.1132       | 123.0602         | 244.1292       | 122.5682         | 2 |
| 7 | 88.0393  |                 |                 |                |                  | D    | 134.0448        | 67.5260         |                |                  | 116.0342       | 58.5207          | 1 |

MS/MS Fragmentation of **MDQVMQFVEPSR**

Found in **P60059**, P60059|SC61G\_HUMAN Protein transport protein Sec61 subunit gamma OS=Homo sapiens  
GN=SEC61G PE=2 SV=1

Match to Query 458: 1539.573820 from(770.794186,2+)

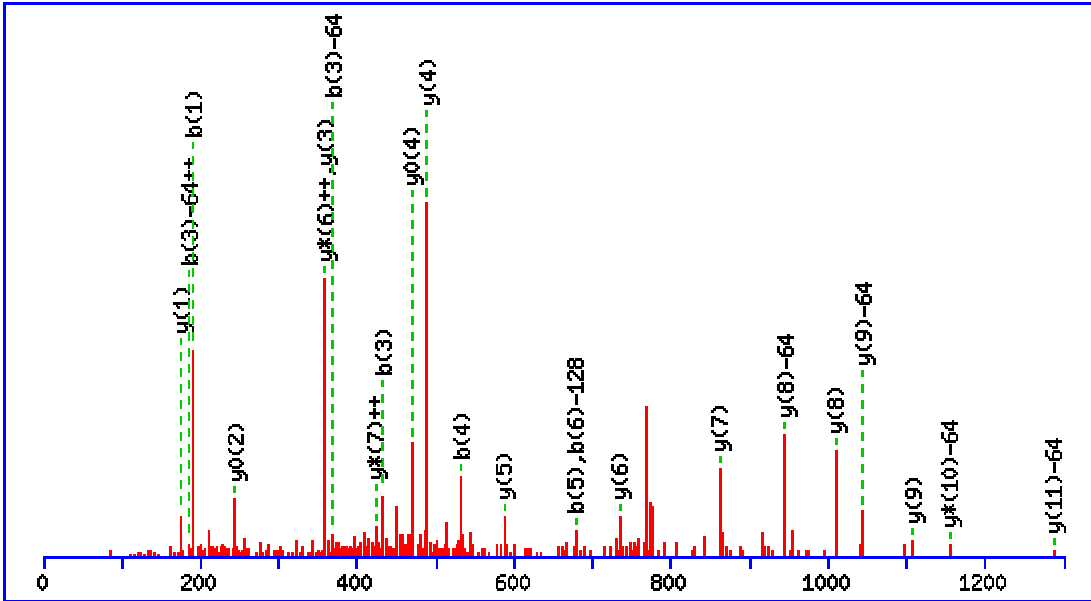

Monoisotopic mass of neutral peptide Mr(calc): 1539.6698

Fixed modifications: Carbamidomethyl (C)

Variable modifications:

N-term : Acetyl (Protein N-term)

M1 : Oxidation (M), with neutral losses 63.9983(shown in table), 0.0000

M5 : Oxidation (M), with neutral losses 63.9983(shown in table), 0.0000

Ions Score: 63 Expect: 3.5e-005

Matches (Bold Red): 23/222 fragment ions using 28 most intense peaks

| #  | Immon.   | b               | b <sup>+</sup>  | b <sup>*</sup> | b <sup>*+</sup> | b <sup>0</sup> | b <sup>0+</sup> | Seq. | y                | y <sup>+</sup> | y <sup>*</sup>   | y <sup>*+</sup> | y <sup>0</sup>  | y <sup>0+</sup> | #  |
|----|----------|-----------------|-----------------|----------------|-----------------|----------------|-----------------|------|------------------|----------------|------------------|-----------------|-----------------|-----------------|----|
| 1  | 56.0495  | 126.0550        | 63.5311         |                |                 |                |                 | M    |                  |                |                  |                 |                 |                 | 12 |
| 2  | 88.0393  | 241.0819        | 121.0446        |                |                 | 223.0713       | 112.0393        | D    | <b>1287.6328</b> | 644.3200       | 1270.6062        | 635.8068        | 1269.6222       | 635.3148        | 11 |
| 3  | 101.0709 | <b>369.1405</b> | <b>185.0739</b> | 352.1139       | 176.5606        | 351.1299       | 176.0686        | Q    | 1172.6059        | 586.8066       | <b>1155.5793</b> | 578.2933        | 1154.5953       | 577.8013        | 10 |
| 4  | 72.0808  | 468.2089        | 234.6081        | 451.1823       | 226.0948        | 450.1983       | 225.6028        | V    | <b>1044.5473</b> | 522.7773       | 1027.5207        | 514.2640        | 1026.5367       | 513.7720        | 9  |
| 5  | 56.0495  | 551.2460        | 276.1266        | 534.2195       | 267.6134        | 533.2354       | 267.1214        | M    | <b>945.4789</b>  | 473.2431       | 928.4523         | 464.7298        | 927.4683        | 464.2378        | 8  |
| 6  | 101.0709 | <b>679.3046</b> | 340.1559        | 662.2780       | 331.6427        | 661.2940       | 331.1506        | Q    | <b>862.4417</b>  | 431.7245       | 845.4152         | <b>423.2112</b> | 844.4312        | 422.7192        | 7  |
| 7  | 120.0808 | 826.3730        | 413.6901        | 809.3465       | 405.1769        | 808.3624       | 404.6849        | F    | <b>734.3832</b>  | 367.6952       | 717.3566         | <b>359.1819</b> | 716.3726        | 358.6899        | 6  |
| 8  | 72.0808  | 925.4414        | 463.2243        | 908.4149       | 454.7111        | 907.4308       | 454.2191        | V    | <b>587.3148</b>  | 294.1610       | 570.2882         | 285.6477        | 569.3042        | 285.1557        | 5  |
| 9  | 102.0550 | 1054.4840       | 527.7456        | 1037.4575      | 519.2324        | 1036.4734      | 518.7404        | E    | <b>488.2463</b>  | 244.6268       | 471.2198         | 236.1135        | <b>470.2358</b> | 235.6215        | 4  |
| 10 | 70.0651  | 1151.5368       | 576.2720        | 1134.5102      | 567.7587        | 1133.5262      | 567.2667        | P    | <b>359.2037</b>  | 180.1055       | 342.1772         | 171.5922        | 341.1932        | 171.1002        | 3  |
| 11 | 60.0444  | 1238.5688       | 619.7880        | 1221.5423      | 611.2748        | 1220.5582      | 610.7828        | S    | 262.1510         | 131.5791       | 245.1244         | 123.0659        | <b>244.1404</b> | 122.5738        | 2  |
| 12 | 129.1135 |                 |                 |                |                 |                |                 | R    | <b>175.1190</b>  | 88.0631        | 158.0924         | 79.5498         |                 |                 | 1  |

MS/MS Fragmentation of **AGAESILANR**

Found in **P15498**, P15498|VAV\_HUMAN Proto-oncogene vav OS=Homo sapiens GN=VAV1 PE=1 SV=4

Match to Query 251: 1000.494024 from(501.254288,2+)

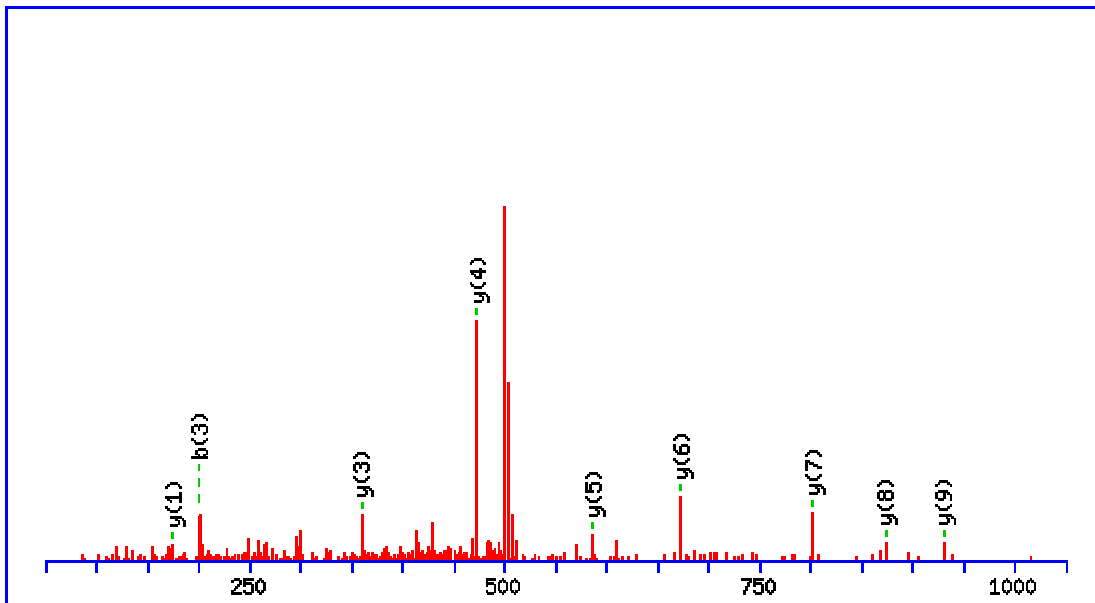

Monoisotopic mass of neutral peptide Mr(calc): 1000.5301

Fixed modifications: Carbamidomethyl (C)

Ions Score: 54 Expect: 0.00034

Matches (**Bold Red**): 9/86 fragment ions using 19 most intense peaks

| #  | Immon.   | b               | b <sup>++</sup> | b <sup>*</sup> | b <sup>*++</sup> | b <sup>0</sup> | b <sup>0++</sup> | Seq. | y               | y <sup>++</sup> | y <sup>*</sup> | y <sup>*++</sup> | y <sup>0</sup> | y <sup>0++</sup> | #  |
|----|----------|-----------------|-----------------|----------------|------------------|----------------|------------------|------|-----------------|-----------------|----------------|------------------|----------------|------------------|----|
| 1  | 44.0495  | 72.0444         | 36.5258         |                |                  |                |                  | A    |                 |                 |                |                  |                |                  | 10 |
| 2  | 30.0338  | 129.0659        | 65.0366         |                |                  |                |                  | G    | <b>930.5003</b> | 465.7538        | 913.4738       | 457.2405         | 912.4898       | 456.7485         | 9  |
| 3  | 44.0495  | <b>200.1030</b> | 100.5551        |                |                  |                |                  | A    | <b>873.4789</b> | 437.2431        | 856.4523       | 428.7298         | 855.4683       | 428.2378         | 8  |
| 4  | 102.0550 | 329.1456        | 165.0764        |                |                  | 311.1350       | 156.0711         | E    | <b>802.4417</b> | 401.7245        | 785.4152       | 393.2112         | 784.4312       | 392.7192         | 7  |
| 5  | 60.0444  | 416.1776        | 208.5924        |                |                  | 398.1670       | 199.5871         | S    | <b>673.3991</b> | 337.2032        | 656.3726       | 328.6899         | 655.3886       | 328.1979         | 6  |
| 6  | 86.0964  | 529.2617        | 265.1345        |                |                  | 511.2511       | 256.1292         | I    | <b>586.3671</b> | 293.6872        | 569.3406       | 285.1739         |                |                  | 5  |
| 7  | 86.0964  | 642.3457        | 321.6765        |                |                  | 624.3352       | 312.6712         | L    | <b>473.2831</b> | 237.1452        | 456.2565       | 228.6319         |                |                  | 4  |
| 8  | 44.0495  | 713.3828        | 357.1951        |                |                  | 695.3723       | 348.1898         | A    | <b>360.1990</b> | 180.6031        | 343.1724       | 172.0899         |                |                  | 3  |
| 9  | 87.0553  | 827.4258        | 414.2165        | 810.3992       | 405.7032         | 809.4152       | 405.2112         | N    | 289.1619        | 145.0846        | 272.1353       | 136.5713         |                |                  | 2  |
| 10 | 129.1135 |                 |                 |                |                  |                |                  | R    | <b>175.1190</b> | 88.0631         | 158.0924       | 79.5498          |                |                  | 1  |

MS/MS Fragmentation of **IIEVSGQK**

Found in **P61106**, P61106|RAB14\_HUMAN Ras-related protein Rab-14 OS=Homo sapiens GN=RAB14 PE=1 SV=4

Match to Query 192: 872.563578 from(437.289065,2+)

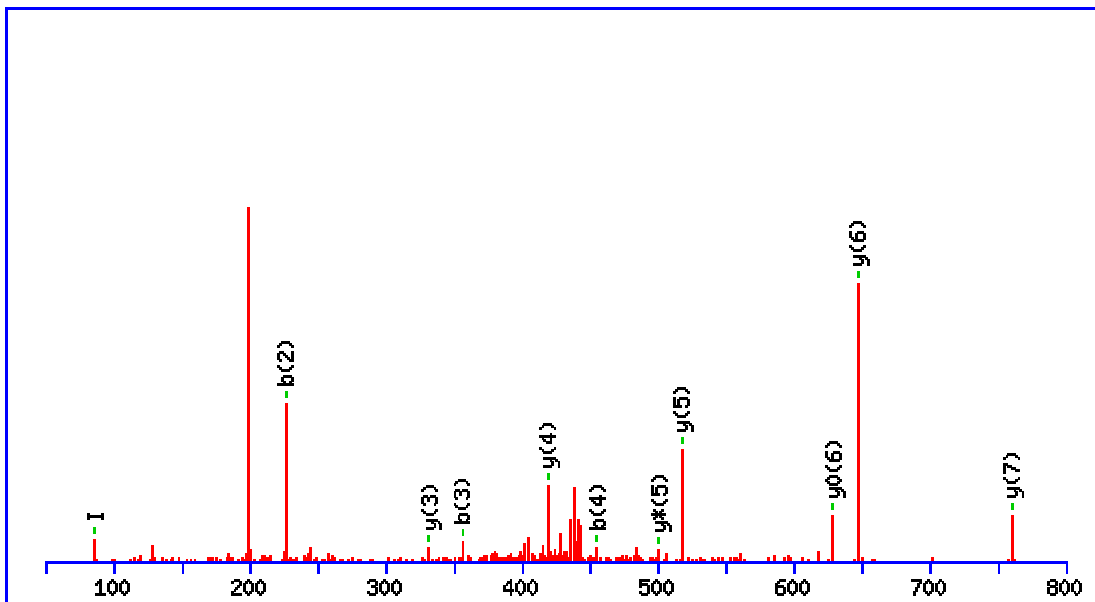

**Monoisotopic mass of neutral peptide Mr(calc):** 872.4967

**Fixed modifications:** Carbamidomethyl (C)

**Ions Score:** 40 **Expect:** 0.011

**Matches (Bold Red):** 12/70 fragment ions using 24 most intense peaks

| # | Immon.         | b               | b <sup>++</sup> | b*       | b <sup>*++</sup> | b <sup>0</sup> | b <sup>0++</sup> | Seq. | y               | y <sup>++</sup> | y*              | y <sup>*++</sup> | y <sup>0</sup>  | y <sup>0++</sup> | # |
|---|----------------|-----------------|-----------------|----------|------------------|----------------|------------------|------|-----------------|-----------------|-----------------|------------------|-----------------|------------------|---|
| 1 | <b>86.0964</b> | 114.0913        | 57.5493         |          |                  |                |                  | I    |                 |                 |                 |                  |                 |                  | 8 |
| 2 | <b>86.0964</b> | <b>227.1754</b> | 114.0913        |          |                  |                |                  | I    | <b>760.4199</b> | 380.7136        | 743.3934        | 372.2003         | 742.4094        | 371.7083         | 7 |
| 3 | 102.0550       | <b>356.2180</b> | 178.6126        |          |                  | 338.2074       | 169.6074         | E    | <b>647.3359</b> | 324.1716        | 630.3093        | 315.6583         | <b>629.3253</b> | 315.1663         | 6 |
| 4 | 72.0808        | <b>455.2864</b> | 228.1468        |          |                  | 437.2758       | 219.1416         | V    | <b>518.2933</b> | 259.6503        | <b>501.2667</b> | 251.1370         | 500.2827        | 250.6450         | 5 |
| 5 | 60.0444        | 542.3184        | 271.6629        |          |                  | 524.3079       | 262.6576         | S    | <b>419.2249</b> | 210.1161        | 402.1983        | 201.6028         | 401.2143        | 201.1108         | 4 |
| 6 | 30.0338        | 599.3399        | 300.1736        |          |                  | 581.3293       | 291.1683         | G    | <b>332.1928</b> | 166.6001        | 315.1663        | 158.0868         |                 |                  | 3 |
| 7 | 101.0709       | 727.3985        | 364.2029        | 710.3719 | 355.6896         | 709.3879       | 355.1976         | Q    | 275.1714        | 138.0893        | 258.1448        | 129.5761         |                 |                  | 2 |
| 8 | 101.1073       |                 |                 |          |                  |                |                  | K    | 147.1128        | 74.0600         | 130.0863        | 65.5468          |                 |                  | 1 |

MS/MS Fragmentation of **TLLGDGPVVTDPK**

Found in **P52566**, P52566|GDIR2\_HUMAN Rho GDP-dissociation inhibitor 2 OS=Homo sapiens  
 GN=ARHGDIB PE=1 SV=3

Match to Query 319: 1310.646764 from(656.330658,2+)

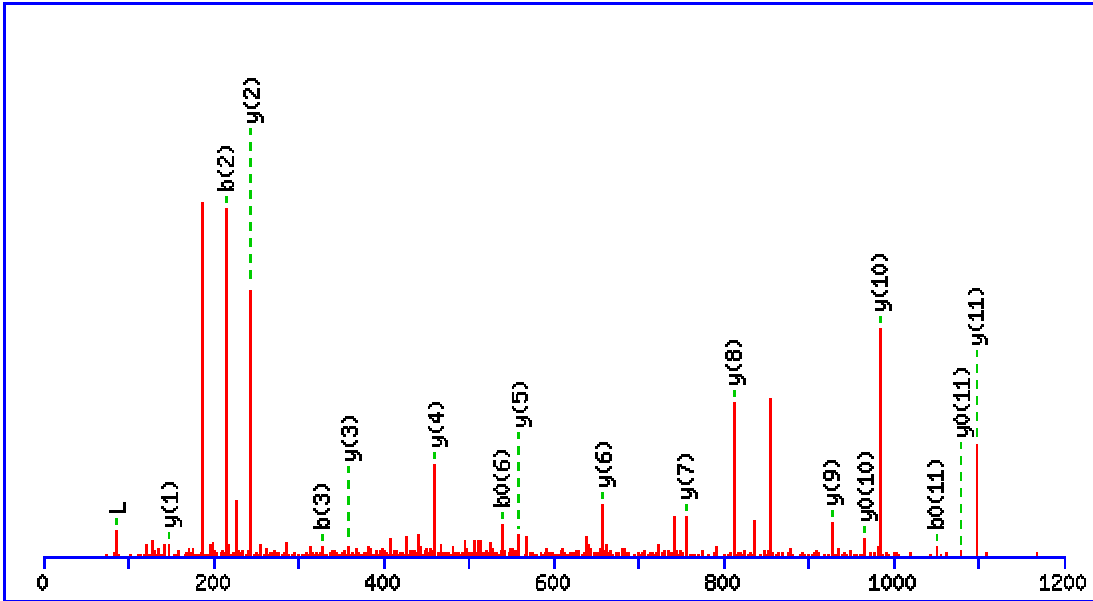

Monoisotopic mass of neutral peptide Mr(calc): 1310.7082

Fixed modifications: Carbamidomethyl (C)

Ions Score: 86 Expect: 1.7e-007

Matches (Bold Red): 19/129 fragment ions using 35 most intense peaks

| #  | Immon.         | b               | b <sup>++</sup> | b <sup>0</sup>   | b <sup>0++</sup> | Seq. | y                | y <sup>++</sup> | y*        | y <sup>*++</sup> | y <sup>0</sup>   | y <sup>0++</sup> | #  |
|----|----------------|-----------------|-----------------|------------------|------------------|------|------------------|-----------------|-----------|------------------|------------------|------------------|----|
| 1  | 74.0600        | 102.0550        | 51.5311         | 84.0444          | 42.5258          | T    |                  |                 |           |                  |                  |                  | 13 |
| 2  | <b>86.0964</b> | <b>215.1390</b> | 108.0731        | 197.1285         | 99.0679          | L    | 1210.6678        | 605.8375        | 1193.6412 | 597.3243         | 1192.6572        | 596.8322         | 12 |
| 3  | <b>86.0964</b> | <b>328.2231</b> | 164.6152        | 310.2125         | 155.6099         | L    | <b>1097.5837</b> | 549.2955        | 1080.5572 | 540.7822         | <b>1079.5732</b> | 540.2902         | 11 |
| 4  | 30.0338        | 385.2445        | 193.1259        | 367.2340         | 184.1206         | G    | <b>984.4997</b>  | 492.7535        | 967.4731  | 484.2402         | <b>966.4891</b>  | 483.7482         | 10 |
| 5  | 88.0393        | 500.2715        | 250.6394        | 482.2609         | 241.6341         | D    | <b>927.4782</b>  | 464.2427        | 910.4516  | 455.7295         | 909.4676         | 455.2375         | 9  |
| 6  | 30.0338        | 557.2930        | 279.1501        | <b>539.2824</b>  | 270.1448         | G    | <b>812.4512</b>  | 406.7293        | 795.4247  | 398.2160         | 794.4407         | 397.7240         | 8  |
| 7  | 70.0651        | 654.3457        | 327.6765        | 636.3352         | 318.6712         | P    | <b>755.4298</b>  | 378.2185        | 738.4032  | 369.7053         | 737.4192         | 369.2132         | 7  |
| 8  | 72.0808        | 753.4141        | 377.2107        | 735.4036         | 368.2054         | V    | <b>658.3770</b>  | 329.6921        | 641.3505  | 321.1789         | 640.3665         | 320.6869         | 6  |
| 9  | 72.0808        | 852.4825        | 426.7449        | 834.4720         | 417.7396         | V    | <b>559.3086</b>  | 280.1579        | 542.2821  | 271.6447         | 541.2980         | 271.1527         | 5  |
| 10 | 74.0600        | 953.5302        | 477.2688        | 935.5197         | 468.2635         | T    | <b>460.2402</b>  | 230.6237        | 443.2136  | 222.1105         | 442.2296         | 221.6185         | 4  |
| 11 | 88.0393        | 1068.5572       | 534.7822        | <b>1050.5466</b> | 525.7769         | D    | <b>359.1925</b>  | 180.0999        | 342.1660  | 171.5866         | 341.1819         | 171.0946         | 3  |
| 12 | 70.0651        | 1165.6099       | 583.3086        | 1147.5994        | 574.3033         | P    | <b>244.1656</b>  | 122.5864        | 227.1390  | 114.0731         |                  |                  | 2  |
| 13 | 101.1073       |                 |                 |                  |                  | K    | <b>147.1128</b>  | 74.0600         | 130.0863  | 65.5468          |                  |                  | 1  |

MS/MS Fragmentation of **VYSTSVTGSR**

Found in **Q9H299**, Q9H299|SH3L3\_HUMAN SH3 domain-binding glutamic acid-rich-like protein 3  
 OS=Homo sapiens GN=SH3BGRL3 PE=1 SV=1

Match to Query 168: 1055.344256 from(528.679404,2+)

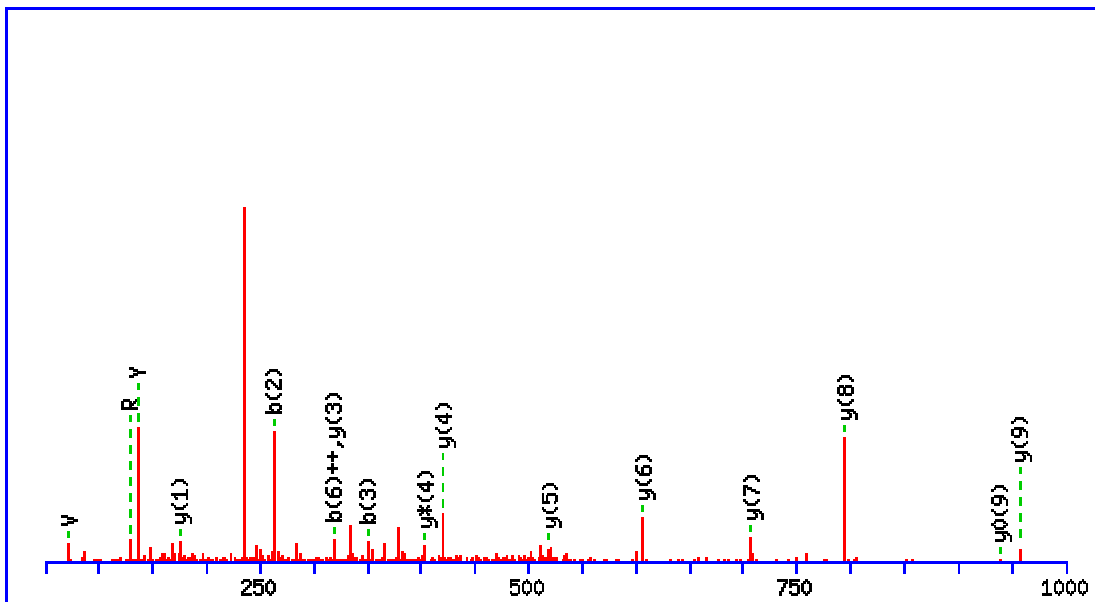

Monoisotopic mass of neutral peptide  $M_r(\text{calc})$ : 1055.5248

Fixed modifications: Carbamidomethyl (C)

Ions Score: 67 Expect: 1.3e-005

Matches (**Bold Red**): 17/94 fragment ions using 28 most intense peaks

| #  | Immon.          | b               | b <sup>++</sup> | b <sup>0</sup> | b <sup>0++</sup> | Seq. | y               | y <sup>++</sup> | y <sup>*</sup>  | y <sup>***</sup> | y <sup>0</sup>  | y <sup>0++</sup> | #  |
|----|-----------------|-----------------|-----------------|----------------|------------------|------|-----------------|-----------------|-----------------|------------------|-----------------|------------------|----|
| 1  | <b>72.0808</b>  | 100.0757        | 50.5415         |                |                  | V    |                 |                 |                 |                  |                 |                  | 10 |
| 2  | <b>136.0757</b> | <b>263.1390</b> | 132.0731        |                |                  | Y    | <b>957.4636</b> | 479.2354        | 940.4371        | 470.7222         | <b>939.4530</b> | 470.2302         | 9  |
| 3  | 60.0444         | <b>350.1710</b> | 175.5892        | 332.1605       | 166.5839         | S    | <b>794.4003</b> | 397.7038        | 777.3737        | 389.1905         | 776.3897        | 388.6985         | 8  |
| 4  | 74.0600         | 451.2187        | 226.1130        | 433.2082       | 217.1077         | T    | <b>707.3682</b> | 354.1878        | 690.3417        | 345.6745         | 689.3577        | 345.1825         | 7  |
| 5  | 60.0444         | 538.2508        | 269.6290        | 520.2402       | 260.6237         | S    | <b>606.3206</b> | 303.6639        | 589.2940        | 295.1506         | 588.3100        | 294.6586         | 6  |
| 6  | <b>72.0808</b>  | 637.3192        | <b>319.1632</b> | 619.3086       | 310.1579         | V    | <b>519.2885</b> | 260.1479        | 502.2620        | 251.6346         | 501.2780        | 251.1426         | 5  |
| 7  | 74.0600         | 738.3668        | 369.6871        | 720.3563       | 360.6818         | T    | <b>420.2201</b> | 210.6137        | <b>403.1936</b> | 202.1004         | 402.2096        | 201.6084         | 4  |
| 8  | 30.0338         | 795.3883        | 398.1978        | 777.3777       | 389.1925         | G    | <b>319.1724</b> | 160.0899        | 302.1459        | 151.5766         | 301.1619        | 151.0846         | 3  |
| 9  | 60.0444         | 882.4203        | 441.7138        | 864.4098       | 432.7085         | S    | 262.1510        | 131.5791        | 245.1244        | 123.0659         | 244.1404        | 122.5738         | 2  |
| 10 | <b>129.1135</b> |                 |                 |                |                  | R    | <b>175.1190</b> | 88.0631         | 158.0924        | 79.5498          |                 |                  | 1  |



MS/MS Fragmentation of **AIEENNF**SK

Found in **P16949**, P16949|STMN1\_HUMAN Stathmin OS=Homo sapiens GN=STMN1 PE=1 SV=3

Match to Query 451: 1164.526660 from(583.270606,2+)

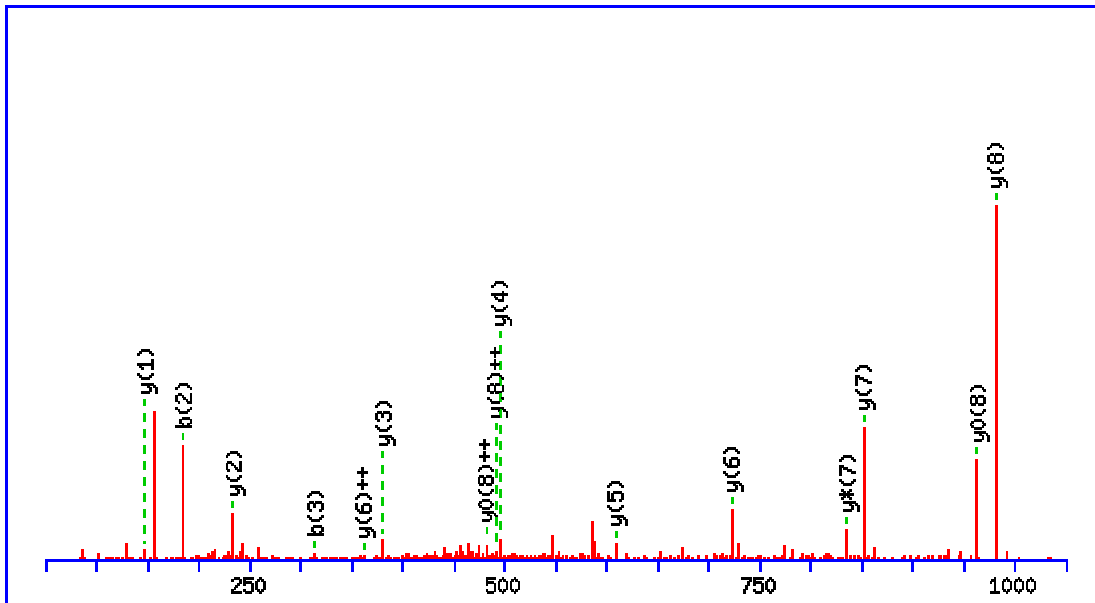

Monoisotopic mass of neutral peptide  $M_r(\text{calc})$ : 1164.5411

Fixed modifications: Carbamidomethyl (C)

Ions Score: 50 Expect: 0.00069

Matches (**Bold Red**): 15/104 fragment ions using 32 most intense peaks

| #  | Immon.   | b               | b <sup>++</sup> | b <sup>*</sup> | b <sup>***</sup> | b <sup>0</sup> | b <sup>0++</sup> | Seq. | y               | y <sup>++</sup> | y <sup>*</sup>  | y <sup>***</sup> | y <sup>0</sup>  | y <sup>0++</sup> | #  |
|----|----------|-----------------|-----------------|----------------|------------------|----------------|------------------|------|-----------------|-----------------|-----------------|------------------|-----------------|------------------|----|
| 1  | 44.0495  | 72.0444         | 36.5258         |                |                  |                |                  | A    |                 |                 |                 |                  |                 |                  | 10 |
| 2  | 86.0964  | <b>185.1285</b> | 93.0679         |                |                  |                |                  | I    | 1094.5113       | 547.7593        | 1077.4847       | 539.2460         | 1076.5007       | 538.7540         | 9  |
| 3  | 102.0550 | <b>314.1710</b> | 157.5892        |                |                  | 296.1605       | 148.5839         | E    | <b>981.4272</b> | <b>491.2172</b> | 964.4007        | 482.7040         | <b>963.4166</b> | <b>482.2120</b>  | 8  |
| 4  | 102.0550 | 443.2136        | 222.1105        |                |                  | 425.2031       | 213.1052         | E    | <b>852.3846</b> | 426.6959        | <b>835.3581</b> | 418.1827         | 834.3741        | 417.6907         | 7  |
| 5  | 87.0553  | 557.2566        | 279.1319        | 540.2300       | 270.6186         | 539.2460       | 270.1266         | N    | <b>723.3420</b> | <b>362.1747</b> | 706.3155        | 353.6614         | 705.3315        | 353.1694         | 6  |
| 6  | 87.0553  | 671.2995        | 336.1534        | 654.2729       | 327.6401         | 653.2889       | 327.1481         | N    | <b>609.2991</b> | 305.1532        | 592.2726        | 296.6399         | 591.2885        | 296.1479         | 5  |
| 7  | 87.0553  | 785.3424        | 393.1748        | 768.3159       | 384.6616         | 767.3319       | 384.1696         | N    | <b>495.2562</b> | 248.1317        | 478.2296        | 239.6185         | 477.2456        | 239.1264         | 4  |
| 8  | 120.0808 | 932.4108        | 466.7091        | 915.3843       | 458.1958         | 914.4003       | 457.7038         | F    | <b>381.2132</b> | 191.1103        | 364.1867        | 182.5970         | 363.2027        | 182.1050         | 3  |
| 9  | 60.0444  | 1019.4429       | 510.2251        | 1002.4163      | 501.7118         | 1001.4323      | 501.2198         | S    | <b>234.1448</b> | 117.5761        | 217.1183        | 109.0628         | 216.1343        | 108.5708         | 2  |
| 10 | 101.1073 |                 |                 |                |                  |                |                  | K    | <b>147.1128</b> | 74.0600         | 130.0863        | 65.5468          |                 |                  | 1  |

Stathmin (P16949): single-peptide based protein identifications indicated as (+) could possibly also be assigned to STMN2\_HUMAN Stathmin-2 (Q93045)

MS/MS Fragmentation of **QALSEIEGR**

Found in **Q13277**, Q13277|STX3\_HUMAN Syntaxin-3 OS=Homo sapiens GN=STX3 PE=1 SV=3

Match to Query 330: 1001.464440 from(501.739496,2+)

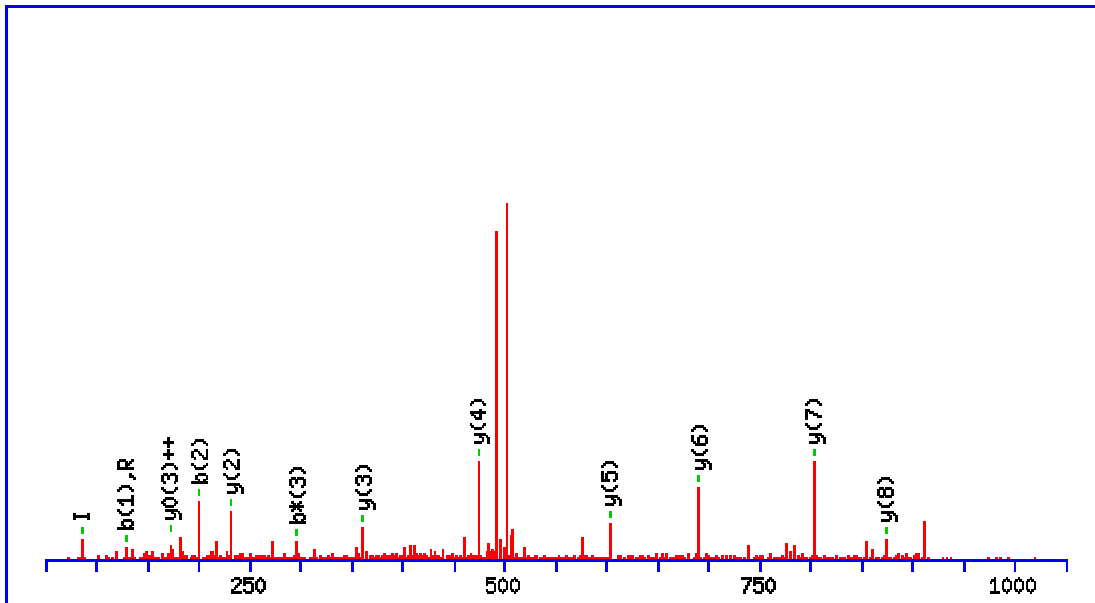

Monoisotopic mass of neutral peptide **Mr(calc)**: 1001.5141

Fixed modifications: Carbamidomethyl (C)

Ions Score: 38 Expect: 0.016

Matches (**Bold Red**): 14/95 fragment ions using 28 most intense peaks

| # | Immon.          | b               | b <sup>++</sup> | b*              | b <sup>***</sup> | b <sup>0</sup> | b <sup>0++</sup> | Seq. | y               | y <sup>++</sup> | y*       | y <sup>***</sup> | y <sup>0</sup> | y <sup>0++</sup> | # |
|---|-----------------|-----------------|-----------------|-----------------|------------------|----------------|------------------|------|-----------------|-----------------|----------|------------------|----------------|------------------|---|
| 1 | 101.0709        | <b>129.0659</b> | 65.0366         | 112.0393        | 56.5233          |                |                  | Q    |                 |                 |          |                  |                |                  | 9 |
| 2 | 44.0495         | <b>200.1030</b> | 100.5551        | 183.0764        | 92.0418          |                |                  | A    | <b>874.4629</b> | 437.7351        | 857.4363 | 429.2218         | 856.4523       | 428.7298         | 8 |
| 3 | <b>86.0964</b>  | 313.1870        | 157.0972        | <b>296.1605</b> | 148.5839         |                |                  | L    | <b>803.4258</b> | 402.2165        | 786.3992 | 393.7032         | 785.4152       | 393.2112         | 7 |
| 4 | 60.0444         | 400.2191        | 200.6132        | 383.1925        | 192.0999         | 382.2085       | 191.6079         | S    | <b>690.3417</b> | 345.6745        | 673.3151 | 337.1612         | 672.3311       | 336.6692         | 6 |
| 5 | 102.0550        | 529.2617        | 265.1345        | 512.2351        | 256.6212         | 511.2511       | 256.1292         | E    | <b>603.3097</b> | 302.1585        | 586.2831 | 293.6452         | 585.2991       | 293.1532         | 5 |
| 6 | <b>86.0964</b>  | 642.3457        | 321.6765        | 625.3192        | 313.1632         | 624.3352       | 312.6712         | I    | <b>474.2671</b> | 237.6372        | 457.2405 | 229.1239         | 456.2565       | 228.6319         | 4 |
| 7 | 102.0550        | 771.3883        | 386.1978        | 754.3618        | 377.6845         | 753.3777       | 377.1925         | E    | <b>361.1830</b> | 181.0951        | 344.1565 | 172.5819         | 343.1724       | <b>172.0899</b>  | 3 |
| 8 | 30.0338         | 828.4098        | 414.7085        | 811.3832        | 406.1953         | 810.3992       | 405.7032         | G    | <b>232.1404</b> | 116.5738        | 215.1139 | 108.0606         |                |                  | 2 |
| 9 | <b>129.1135</b> |                 |                 |                 |                  |                |                  | R    | 175.1190        | 88.0631         | 158.0924 | 79.5498          |                |                  | 1 |

MS/MS Fragmentation of **LLGELLQDNAK**

Found in **P37837**, P37837|TALDO\_HUMAN Transaldolase OS=Homo sapiens GN=TALDO1 PE=1 SV=2

Match to Query 492: 1212.633868 from(607.324210,2+)

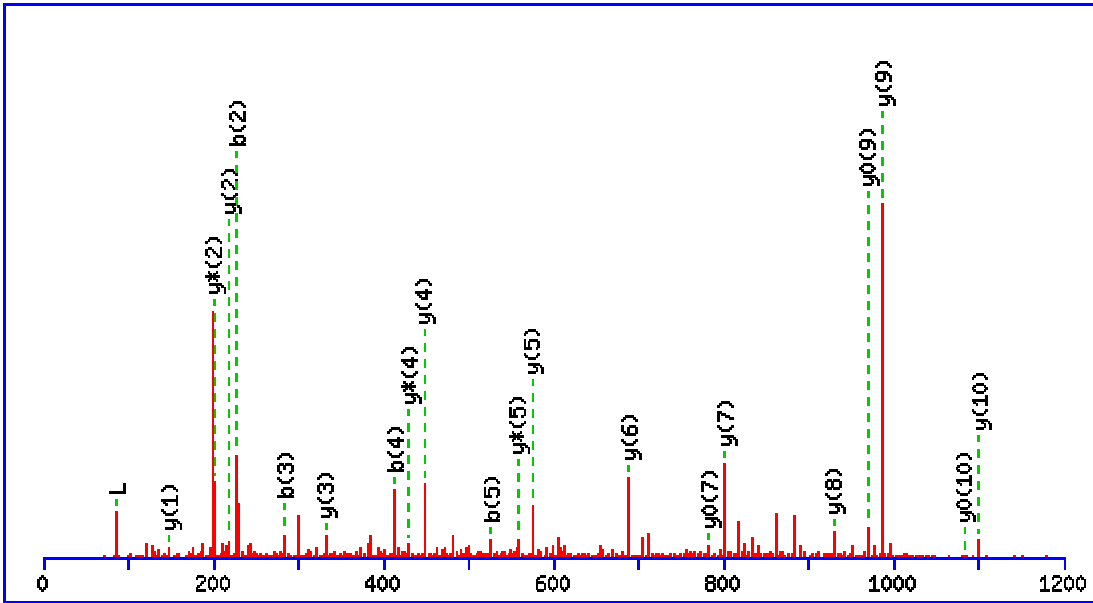

Monoisotopic mass of neutral peptide **Mr(calc): 1212.6714**

Fixed modifications: Carbamidomethyl (C)

Ions Score: 55 Expect: 0.00021

Matches (**Bold Red**): 24/107 fragment ions using 65 most intense peaks

| #  | Immon.         | b               | b <sup>++</sup> | b*        | b <sup>***</sup> | b <sup>0</sup> | b <sup>++</sup> | Seq. | y                | y <sup>++</sup> | y*              | y <sup>***</sup> | y <sup>0</sup>   | y <sup>0++</sup> | #  |
|----|----------------|-----------------|-----------------|-----------|------------------|----------------|-----------------|------|------------------|-----------------|-----------------|------------------|------------------|------------------|----|
| 1  | <b>86.0964</b> | 114.0913        | 57.5493         |           |                  |                |                 | L    |                  |                 |                 |                  |                  |                  | 11 |
| 2  | <b>86.0964</b> | <b>227.1754</b> | 114.0913        |           |                  |                |                 | L    | <b>1100.5946</b> | 550.8009        | 1083.5681       | 542.2877         | <b>1082.5841</b> | 541.7957         | 10 |
| 3  | 30.0338        | <b>284.1969</b> | 142.6021        |           |                  |                |                 | G    | <b>987.5106</b>  | 494.2589        | 970.4840        | 485.7456         | <b>969.5000</b>  | 485.2536         | 9  |
| 4  | 102.0550       | <b>413.2395</b> | 207.1234        |           |                  | 395.2289       | 198.1181        | E    | <b>930.4891</b>  | 465.7482        | 913.4625        | 457.2349         | 912.4785         | 456.7429         | 8  |
| 5  | <b>86.0964</b> | <b>526.3235</b> | 263.6654        |           |                  | 508.3130       | 254.6601        | L    | <b>801.4465</b>  | 401.2269        | 784.4199        | 392.7136         | <b>783.4359</b>  | 392.2216         | 7  |
| 6  | <b>86.0964</b> | 639.4076        | 320.2074        |           |                  | 621.3970       | 311.2022        | L    | <b>688.3624</b>  | 344.6849        | 671.3359        | 336.1716         | 670.3519         | 335.6796         | 6  |
| 7  | 101.0709       | 767.4662        | 384.2367        | 750.4396  | 375.7234         | 749.4556       | 375.2314        | Q    | <b>575.2784</b>  | 288.1428        | <b>558.2518</b> | 279.6295         | 557.2678         | 279.1375         | 5  |
| 8  | 88.0393        | 882.4931        | 441.7502        | 865.4666  | 433.2369         | 864.4825       | 432.7449        | D    | <b>447.2198</b>  | 224.1135        | <b>430.1932</b> | 215.6003         | 429.2092         | 215.1082         | 4  |
| 9  | 87.0553        | 996.5360        | 498.7717        | 979.5095  | 490.2584         | 978.5255       | 489.7664        | N    | <b>332.1928</b>  | 166.6001        | 315.1663        | 158.0868         |                  |                  | 3  |
| 10 | 44.0495        | 1067.5732       | 534.2902        | 1050.5466 | 525.7769         | 1049.5626      | 525.2849        | A    | <b>218.1499</b>  | 109.5786        | <b>201.1234</b> | 101.0653         |                  |                  | 2  |
| 11 | 101.1073       |                 |                 |           |                  |                |                 | K    | <b>147.1128</b>  | 74.0600         | 130.0863        | 65.5468          |                  |                  | 1  |

MS/MS Fragmentation of **GDELADSALEIFK**

Found in **Q15582**, Q15582|BGH3\_HUMAN Transforming growth factor-beta-induced protein ig-h3 OS=Homo sapiens GN=TGFBI PE=1 SV=1

Match to Query 615: 1406.651150 from(704.332851,2+)

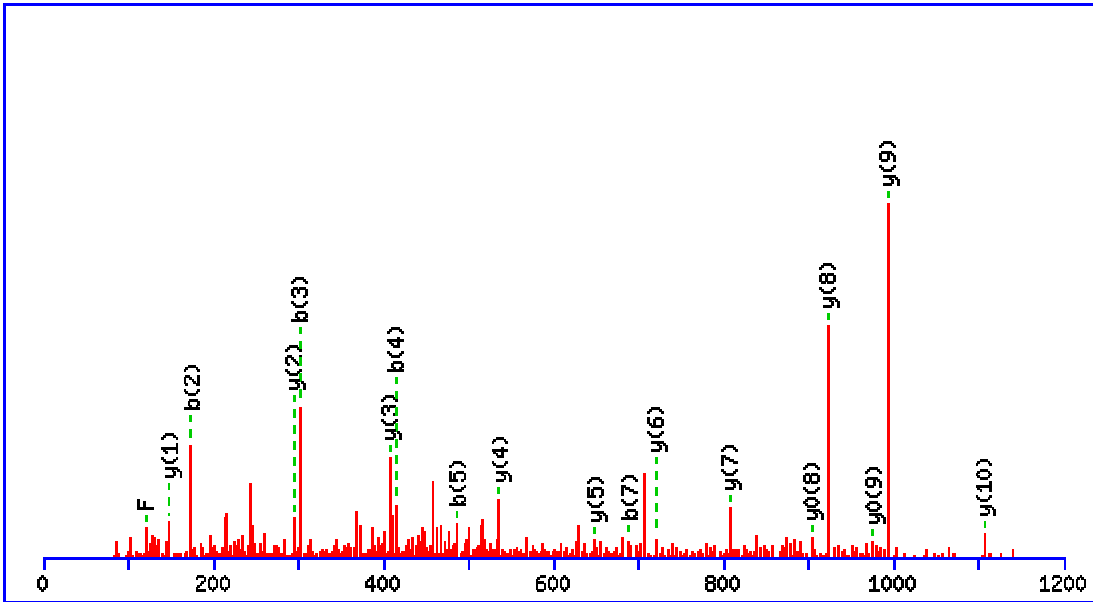

Monoisotopic mass of neutral peptide Mr(calc): 1406.6929

Fixed modifications: Carbamidomethyl (C)

Ions Score: 71 Expect: 6e-006

Matches (Bold Red): 18/125 fragment ions using 33 most intense peaks

| #  | Immon.          | b               | b <sup>++</sup> | b <sup>0</sup> | b <sup>0++</sup> | Seq. | y                | y <sup>++</sup> | y <sup>*</sup> | y <sup>*++</sup> | y <sup>0</sup>  | y <sup>0++</sup> | #  |
|----|-----------------|-----------------|-----------------|----------------|------------------|------|------------------|-----------------|----------------|------------------|-----------------|------------------|----|
| 1  | 30.0338         | 58.0287         | 29.5180         |                |                  | G    |                  |                 |                |                  |                 |                  | 13 |
| 2  | 88.0393         | <b>173.0557</b> | 87.0315         | 155.0451       | 78.0262          | D    | 1350.6787        | 675.8430        | 1333.6522      | 667.3297         | 1332.6682       | 666.8377         | 12 |
| 3  | 102.0550        | <b>302.0983</b> | 151.5528        | 284.0877       | 142.5475         | E    | 1235.6518        | 618.3295        | 1218.6252      | 609.8163         | 1217.6412       | 609.3243         | 11 |
| 4  | 86.0964         | <b>415.1823</b> | 208.0948        | 397.1718       | 199.0895         | L    | <b>1106.6092</b> | 553.8082        | 1089.5827      | 545.2950         | 1088.5986       | 544.8030         | 10 |
| 5  | 44.0495         | <b>486.2195</b> | 243.6134        | 468.2089       | 234.6081         | A    | <b>993.5251</b>  | 497.2662        | 976.4986       | 488.7529         | <b>975.5146</b> | 488.2609         | 9  |
| 6  | 88.0393         | 601.2464        | 301.1268        | 583.2358       | 292.1216         | D    | <b>922.4880</b>  | 461.7477        | 905.4615       | 453.2344         | <b>904.4775</b> | 452.7424         | 8  |
| 7  | 60.0444         | <b>688.2784</b> | 344.6429        | 670.2679       | 335.6376         | S    | <b>807.4611</b>  | 404.2342        | 790.4345       | 395.7209         | 789.4505        | 395.2289         | 7  |
| 8  | 44.0495         | 759.3155        | 380.1614        | 741.3050       | 371.1561         | A    | <b>720.4291</b>  | 360.7182        | 703.4025       | 352.2049         | 702.4185        | 351.7129         | 6  |
| 9  | 86.0964         | 872.3996        | 436.7034        | 854.3890       | 427.6982         | L    | <b>649.3919</b>  | 325.1996        | 632.3654       | 316.6863         | 631.3814        | 316.1943         | 5  |
| 10 | 102.0550        | 1001.4422       | 501.2247        | 983.4316       | 492.2195         | E    | <b>536.3079</b>  | 268.6576        | 519.2813       | 260.1443         | 518.2973        | 259.6523         | 4  |
| 11 | 86.0964         | 1114.5263       | 557.7668        | 1096.5157      | 548.7615         | I    | <b>407.2653</b>  | 204.1363        | 390.2387       | 195.6230         |                 |                  | 3  |
| 12 | <b>120.0808</b> | 1261.5947       | 631.3010        | 1243.5841      | 622.2957         | F    | <b>294.1812</b>  | 147.5942        | 277.1547       | 139.0810         |                 |                  | 2  |
| 13 | 101.1073        |                 |                 |                |                  | K    | <b>147.1128</b>  | 74.0600         | 130.0863       | 65.5468          |                 |                  | 1  |

MS/MS Fragmentation of **VQNMALYADVGGK**

Found in **P51571**, P51571|SSRD\_HUMAN Translocon-associated protein subunit delta OS=Homo sapiens  
 GN=SSR4 PE=1 SV=1

Match to Query 415: 1380.725486 from(691.370019,2+)

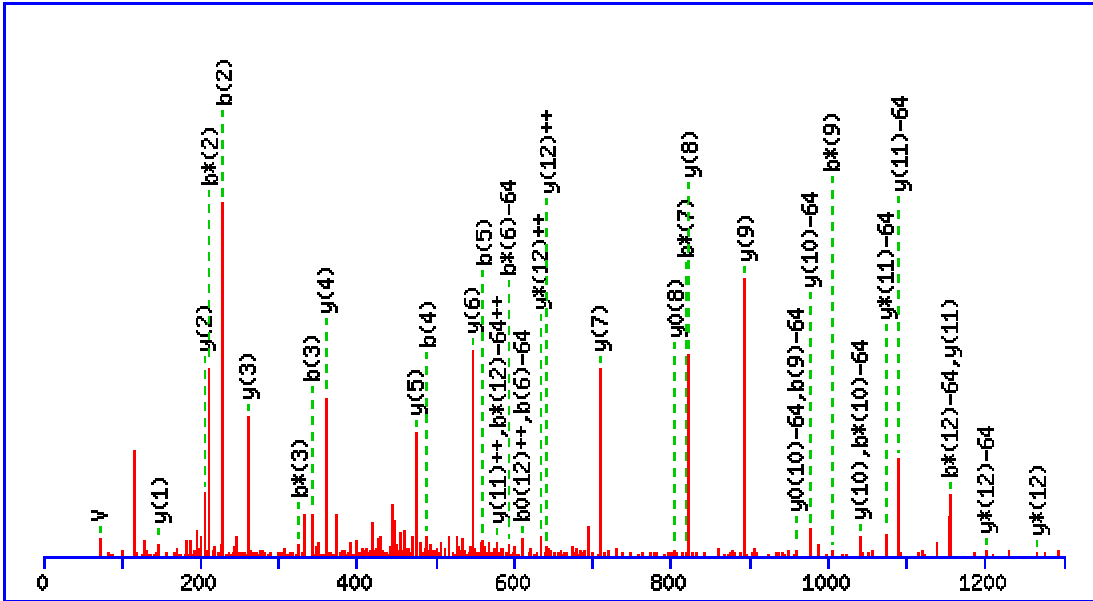

Monoisotopic mass of neutral peptide Mr(calc): 1380.6707

Fixed modifications: Carbamidomethyl (C)

Variable modifications:

M4 : Oxidation (M), with neutral losses 63.9983(shown in table), 0.0000

Ions Score: 67 Expect: 1.3e-005

Matches (Bold Red): 38/194 fragment ions using 69 most intense peaks

| #  | Immon.         | b               | b <sup>++</sup> | b <sup>*</sup>   | b <sup>***</sup> | b <sup>0</sup> | b <sup>0++</sup> | Seq. | y                | y <sup>++</sup> | y <sup>*</sup>   | y <sup>***</sup> | y <sup>0</sup>  | y <sup>0++</sup> | #  |
|----|----------------|-----------------|-----------------|------------------|------------------|----------------|------------------|------|------------------|-----------------|------------------|------------------|-----------------|------------------|----|
| 1  | <b>72.0808</b> | 100.0757        | 50.5415         |                  |                  |                |                  | V    |                  |                 |                  |                  |                 |                  | 13 |
| 2  | 101.0709       | <b>228.1343</b> | 114.5708        | <b>211.1077</b>  | 106.0575         |                |                  | Q    | 1218.6113        | 609.8093        | <b>1201.5848</b> | 601.2960         | 1200.6008       | 600.8040         | 12 |
| 3  | 87.0553        | <b>342.1772</b> | 171.5922        | <b>325.1506</b>  | 163.0790         |                |                  | N    | <b>1090.5528</b> | 545.7800        | <b>1073.5262</b> | 537.2667         | 1072.5422       | 536.7747         | 11 |
| 4  | 56.0495        | 425.2143        | 213.1108        | 408.1878         | 204.5975         |                |                  | M    | <b>976.5098</b>  | 488.7586        | 959.4833         | 480.2453         | <b>958.4993</b> | 479.7533         | 10 |
| 5  | 44.0495        | 496.2514        | 248.6294        | 479.2249         | 240.1161         |                |                  | A    | <b>893.4727</b>  | 447.2400        | 876.4462         | 438.7267         | 875.4621        | 438.2347         | 9  |
| 6  | 86.0964        | <b>609.3355</b> | 305.1714        | <b>592.3089</b>  | 296.6581         |                |                  | L    | <b>822.4356</b>  | 411.7214        | 805.4090         | 403.2082         | <b>804.4250</b> | 402.7162         | 8  |
| 7  | 136.0757       | 772.3988        | 386.7030        | 755.3723         | 378.1898         |                |                  | Y    | <b>709.3515</b>  | 355.1794        | 692.3250         | 346.6661         | 691.3410        | 346.1741         | 7  |
| 8  | 44.0495        | 843.4359        | 422.2216        | 826.4094         | 413.7083         |                |                  | A    | <b>546.2882</b>  | 273.6477        | 529.2617         | 265.1345         | 528.2776        | 264.6425         | 6  |
| 9  | 88.0393        | <b>958.4629</b> | 479.7351        | 941.4363         | 471.2218         | 940.4523       | 470.7298         | D    | <b>475.2511</b>  | 238.1292        | 458.2245         | 229.6159         | 457.2405        | 229.1239         | 5  |
| 10 | <b>72.0808</b> | 1057.5313       | 529.2693        | <b>1040.5047</b> | 520.7560         | 1039.5207      | 520.2640         | V    | <b>360.2241</b>  | 180.6157        | 343.1976         | 172.1024         |                 |                  | 4  |
| 11 | 30.0338        | 1114.5528       | 557.7800        | 1097.5262        | 549.2667         | 1096.5422      | 548.7747         | G    | <b>261.1557</b>  | 131.0815        | 244.1292         | 122.5682         |                 |                  | 3  |
| 12 | 30.0338        | 1171.5742       | 586.2907        | <b>1154.5477</b> | <b>577.7775</b>  | 1153.5637      | 577.2855         | G    | <b>204.1343</b>  | 102.5708        | 187.1077         | 94.0575          |                 |                  | 2  |
| 13 | 101.1073       |                 |                 |                  |                  |                |                  | K    | <b>147.1128</b>  | 74.0600         | 130.0863         | 65.5468          |                 |                  | 1  |

MS/MS Fragmentation of **TSAALSTVGSISR**

Found in **O43399**, O43399|TPD54\_HUMAN Tumor protein D54 OS=Homo sapiens GN=TPD52L2 PE=1 SV=2

Match to Query 554: 1319.691698 from(660.853125,2+)

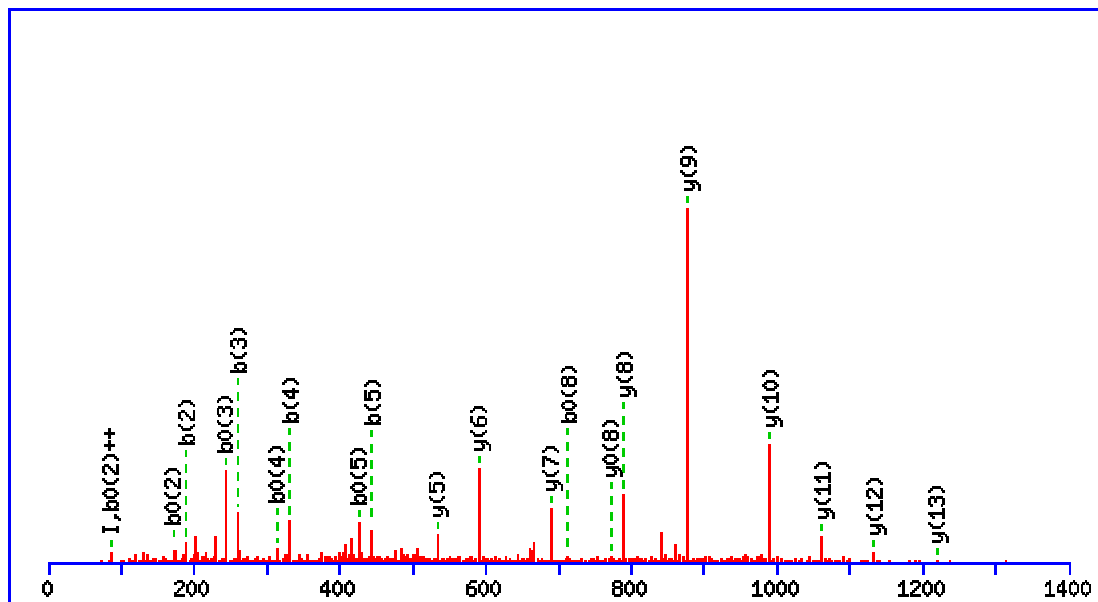

Monoisotopic mass of neutral peptide Mr(calc): 1319.7045

Fixed modifications: Carbamidomethyl (C)

Ions Score: 73 Expect: 3.7e-006

Matches (Bold Red): 22/142 fragment ions using 30 most intense peaks

| #  | Immon.         | b               | b <sup>++</sup> | b <sup>0</sup>  | b <sup>0++</sup> | Seq. | y                | y <sup>++</sup> | y*        | y <sup>*++</sup> | y <sup>0</sup>  | y <sup>0++</sup> | #  |
|----|----------------|-----------------|-----------------|-----------------|------------------|------|------------------|-----------------|-----------|------------------|-----------------|------------------|----|
| 1  | 74.0600        | 102.0550        | 51.5311         | 84.0444         | 42.5258          | T    |                  |                 |           |                  |                 |                  | 14 |
| 2  | 60.0444        | <b>189.0870</b> | 95.0471         | <b>171.0764</b> | <b>86.0418</b>   | S    | <b>1219.6641</b> | 610.3357        | 1202.6375 | 601.8224         | 1201.6535       | 601.3304         | 13 |
| 3  | 44.0495        | <b>260.1241</b> | 130.5657        | <b>242.1135</b> | 121.5604         | A    | <b>1132.6321</b> | 566.8197        | 1115.6055 | 558.3064         | 1114.6215       | 557.8144         | 12 |
| 4  | 44.0495        | <b>331.1612</b> | 166.0842        | <b>313.1506</b> | 157.0790         | A    | <b>1061.5949</b> | 531.3011        | 1044.5684 | 522.7878         | 1043.5844       | 522.2958         | 11 |
| 5  | <b>86.0964</b> | <b>444.2453</b> | 222.6263        | <b>426.2347</b> | 213.6210         | L    | <b>990.5578</b>  | 495.7826        | 973.5313  | 487.2693         | 972.5473        | 486.7773         | 10 |
| 6  | 60.0444        | 531.2773        | 266.1423        | 513.2667        | 257.1370         | S    | <b>877.4738</b>  | 439.2405        | 860.4472  | 430.7272         | 859.4632        | 430.2352         | 9  |
| 7  | 74.0600        | 632.3250        | 316.6661        | 614.3144        | 307.6608         | T    | <b>790.4417</b>  | 395.7245        | 773.4152  | 387.2112         | <b>772.4312</b> | 386.7192         | 8  |
| 8  | 72.0808        | 731.3934        | 366.2003        | <b>713.3828</b> | 357.1951         | V    | <b>689.3941</b>  | 345.2007        | 672.3675  | 336.6874         | 671.3835        | 336.1954         | 7  |
| 9  | 30.0338        | 788.4149        | 394.7111        | 770.4043        | 385.7058         | G    | <b>590.3257</b>  | 295.6665        | 573.2991  | 287.1532         | 572.3151        | 286.6612         | 6  |
| 10 | 60.0444        | 875.4469        | 438.2271        | 857.4363        | 429.2218         | S    | <b>533.3042</b>  | 267.1557        | 516.2776  | 258.6425         | 515.2936        | 258.1504         | 5  |
| 11 | 44.0495        | 946.4840        | 473.7456        | 928.4734        | 464.7404         | A    | 446.2722         | 223.6397        | 429.2456  | 215.1264         | 428.2616        | 214.6344         | 4  |
| 12 | <b>86.0964</b> | 1059.5681       | 530.2877        | 1041.5575       | 521.2824         | I    | 375.2350         | 188.1212        | 358.2085  | 179.6079         | 357.2245        | 179.1159         | 3  |
| 13 | 60.0444        | 1146.6001       | 573.8037        | 1128.5895       | 564.7984         | S    | 262.1510         | 131.5791        | 245.1244  | 123.0659         | 244.1404        | 122.5738         | 2  |
| 14 | 129.1135       |                 |                 |                 |                  | R    | 175.1190         | 88.0631         | 158.0924  | 79.5498          |                 |                  | 1  |

MS/MS Fragmentation of **TSALTQGLER**

Found in **Q0VGL1**, Q0VGL1|CG059\_HUMAN UPF0539 protein C7orf59 OS=Homo sapiens GN=C7orf59 PE=3 SV=1

Match to Query 287: 1116.509622 from(559.262087,2+)

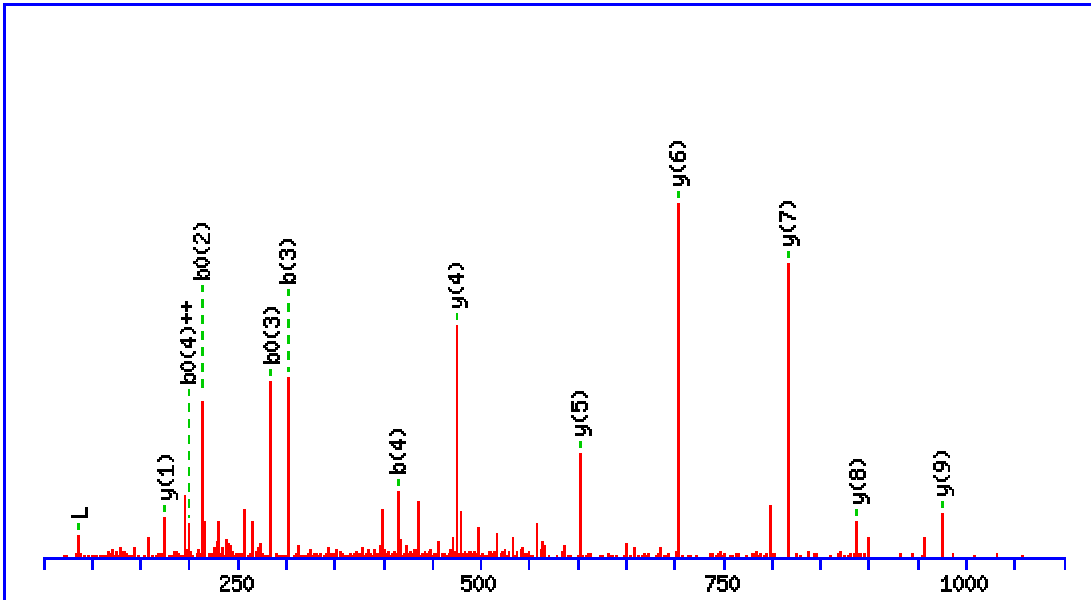

**Monoisotopic mass of neutral peptide Mr(calc):** 1116.5775

**Fixed modifications:** Carbamidomethyl (C)

**Variable modifications:**

**N-term :** Acetyl (Protein N-term)

**Ions Score:** 62 **Expect:** 4.8e-005

**Matches (Bold Red):** 14/106 fragment ions using 14 most intense peaks

| #  | Immon.         | b               | b <sup>++</sup> | b <sup>*</sup> | b <sup>*++</sup> | b <sup>0</sup>  | b <sup>0++</sup> | Seq. | y               | y <sup>++</sup> | y <sup>*</sup> | y <sup>*++</sup> | y <sup>0</sup> | y <sup>0++</sup> | #  |
|----|----------------|-----------------|-----------------|----------------|------------------|-----------------|------------------|------|-----------------|-----------------|----------------|------------------|----------------|------------------|----|
| 1  | 74.0600        | 144.0655        | 72.5364         |                |                  | 126.0549        | 63.5311          | T    |                 |                 |                |                  |                |                  | 10 |
| 2  | 60.0444        | 231.0975        | 116.0524        |                |                  | <b>213.0870</b> | 107.0471         | S    | <b>974.5265</b> | 487.7669        | 957.5000       | 479.2536         | 956.5160       | 478.7616         | 9  |
| 3  | 44.0495        | <b>302.1347</b> | 151.5710        |                |                  | <b>284.1241</b> | 142.5657         | A    | <b>887.4945</b> | 444.2509        | 870.4680       | 435.7376         | 869.4839       | 435.2456         | 8  |
| 4  | <b>86.0964</b> | <b>415.2187</b> | 208.1130        |                |                  | 397.2082        | <b>199.1077</b>  | L    | <b>816.4574</b> | 408.7323        | 799.4308       | 400.2191         | 798.4468       | 399.7271         | 7  |
| 5  | 74.0600        | 516.2664        | 258.6368        |                |                  | 498.2558        | 249.6316         | T    | <b>703.3733</b> | 352.1903        | 686.3468       | 343.6770         | 685.3628       | 343.1850         | 6  |
| 6  | 101.0709       | 644.3250        | 322.6661        | 627.2984       | 314.1529         | 626.3144        | 313.6608         | Q    | <b>602.3257</b> | 301.6665        | 585.2991       | 293.1532         | 584.3151       | 292.6612         | 5  |
| 7  | 30.0338        | 701.3464        | 351.1769        | 684.3199       | 342.6636         | 683.3359        | 342.1716         | G    | <b>474.2671</b> | 237.6372        | 457.2405       | 229.1239         | 456.2565       | 228.6319         | 4  |
| 8  | <b>86.0964</b> | 814.4305        | 407.7189        | 797.4040       | 399.2056         | 796.4199        | 398.7136         | L    | 417.2456        | 209.1264        | 400.2191       | 200.6132         | 399.2350       | 200.1212         | 3  |
| 9  | 102.0550       | 943.4731        | 472.2402        | 926.4465       | 463.7269         | 925.4625        | 463.2349         | E    | 304.1615        | 152.5844        | 287.1350       | 144.0711         | 286.1510       | 143.5791         | 2  |
| 10 | 129.1135       |                 |                 |                |                  |                 |                  | R    | <b>175.1190</b> | 88.0631         | 158.0924       | 79.5498          |                |                  | 1  |

MS/MS Fragmentation of **FLTGPLNLNDPDAK**

Found in **O95766**, O95766|CG028\_HUMAN UPF0550 protein C7orf28 OS=Homo sapiens GN=C7orf28A PE=1 SV=1

Match to Query 408: 1513.753854 from(757.884203,2+)

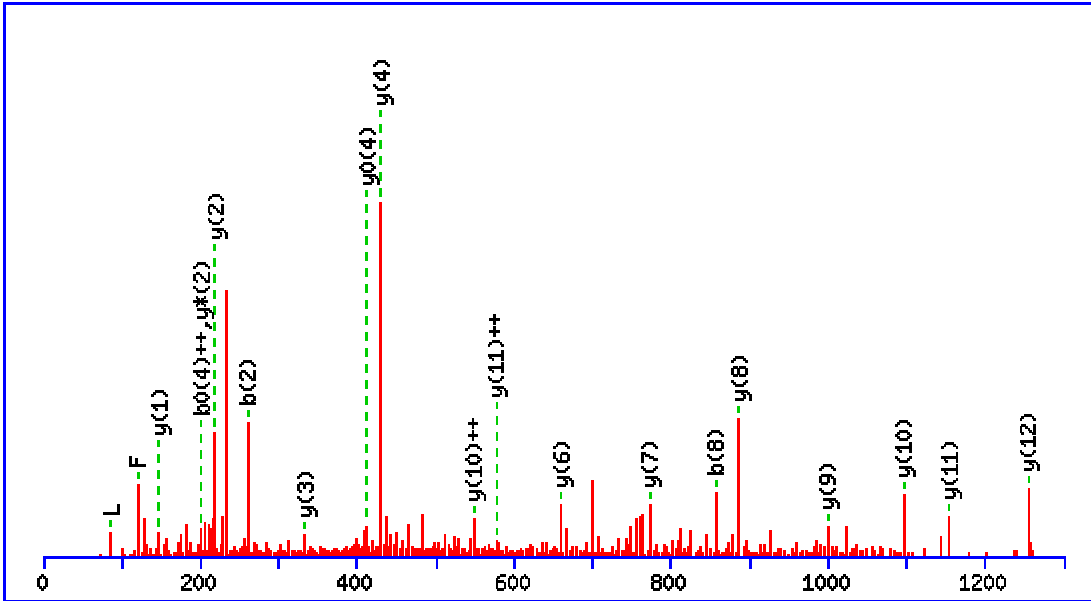

Monoisotopic mass of neutral peptide Mr(calc): 1513.7776

Fixed modifications: Carbamidomethyl (C)

Ions Score: 59 Expect: 7.6e-005

Matches (Bold Red): 22/150 fragment ions using 57 most intense peaks

| #  | Immon.          | b               | b <sup>++</sup> | b*        | b <sup>+++</sup> | b <sup>0</sup> | b <sup>0++</sup> | Seq. | y                | y <sup>++</sup> | y*              | y <sup>+++</sup> | y <sup>0</sup>  | y <sup>0++</sup> | #  |
|----|-----------------|-----------------|-----------------|-----------|------------------|----------------|------------------|------|------------------|-----------------|-----------------|------------------|-----------------|------------------|----|
| 1  | <b>120.0808</b> | 148.0757        | 74.5415         |           |                  |                |                  | F    |                  |                 |                 |                  |                 |                  | 14 |
| 2  | <b>86.0964</b>  | <b>261.1598</b> | 131.0835        |           |                  |                |                  | L    | 1367.7165        | 684.3619        | 1350.6900       | 675.8486         | 1349.7060       | 675.3566         | 13 |
| 3  | 74.0600         | 362.2074        | 181.6074        |           |                  | 344.1969       | 172.6021         | T    | <b>1254.6325</b> | 627.8199        | 1237.6059       | 619.3066         | 1236.6219       | 618.8146         | 12 |
| 4  | 30.0338         | 419.2289        | 210.1181        |           |                  | 401.2183       | <b>201.1128</b>  | G    | <b>1153.5848</b> | <b>577.2960</b> | 1136.5582       | 568.7828         | 1135.5742       | 568.2907         | 11 |
| 5  | 70.0651         | 516.2817        | 258.6445        |           |                  | 498.2711       | 249.6392         | P    | <b>1096.5633</b> | <b>548.7853</b> | 1079.5368       | 540.2720         | 1078.5527       | 539.7800         | 10 |
| 6  | <b>86.0964</b>  | 629.3657        | 315.1865        |           |                  | 611.3552       | 306.1812         | L    | <b>999.5106</b>  | 500.2589        | 982.4840        | 491.7456         | 981.5000        | 491.2536         | 9  |
| 7  | 87.0553         | 743.4087        | 372.2080        | 726.3821  | 363.6947         | 725.3981       | 363.2027         | N    | <b>886.4265</b>  | 443.7169        | 869.3999        | 435.2036         | 868.4159        | 434.7116         | 8  |
| 8  | <b>86.0964</b>  | <b>856.4927</b> | 428.7500        | 839.4662  | 420.2367         | 838.4822       | 419.7447         | L    | <b>772.3836</b>  | 386.6954        | 755.3570        | 378.1821         | 754.3730        | 377.6901         | 7  |
| 9  | 87.0553         | 970.5356        | 485.7715        | 953.5091  | 477.2582         | 952.5251       | 476.7662         | N    | <b>659.2995</b>  | 330.1534        | 642.2729        | 321.6401         | 641.2889        | 321.1481         | 6  |
| 10 | 88.0393         | 1085.5626       | 543.2849        | 1068.5360 | 534.7717         | 1067.5520      | 534.2796         | D    | 545.2566         | 273.1319        | 528.2300        | 264.6186         | 527.2460        | 264.1266         | 5  |
| 11 | 70.0651         | 1182.6154       | 591.8113        | 1165.5888 | 583.2980         | 1164.6048      | 582.8060         | P    | <b>430.2296</b>  | 215.6185        | 413.2031        | 207.1052         | <b>412.2191</b> | 206.6132         | 4  |
| 12 | 88.0393         | 1297.6423       | 649.3248        | 1280.6157 | 640.8115         | 1279.6317      | 640.3195         | D    | <b>333.1769</b>  | 167.0921        | 316.1503        | 158.5788         | 315.1663        | 158.0868         | 3  |
| 13 | 44.0495         | 1368.6794       | 684.8433        | 1351.6529 | 676.3301         | 1350.6688      | 675.8381         | A    | <b>218.1499</b>  | 109.5786        | <b>201.1234</b> | 101.0653         |                 |                  | 2  |
| 14 | 101.1073        |                 |                 |           |                  |                |                  | K    | <b>147.1128</b>  | 74.0600         | 130.0863        | 65.5468          |                 |                  | 1  |



MS/MS Fragmentation of **GVTQIDNDLK**

Found in **P21283**, P21283|VATC1\_HUMAN Vacuolar proton pump subunit C 1 OS=Homo sapiens  
 GN=ATP6V1C1 PE=1 SV=4

Match to Query 314: 1101.550052 from(551.782302,2+)

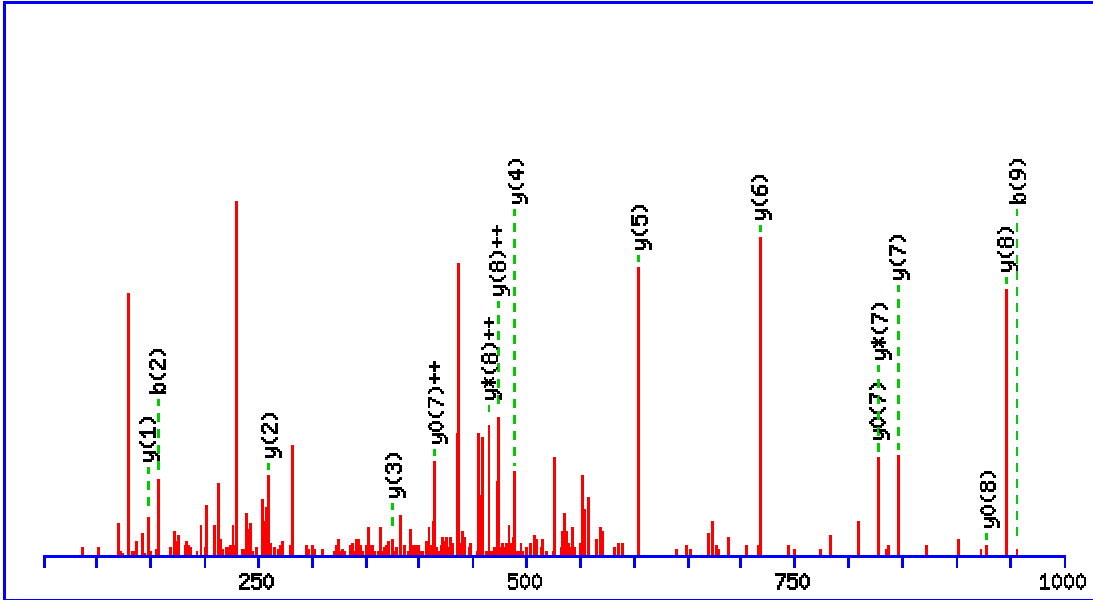

Monoisotopic mass of neutral peptide Mr(calc): 1101.5666

Fixed modifications: Carbamidomethyl (C)

Ions Score: 44 Expect: 0.0034

Matches (Bold Red): 16/104 fragment ions using 40 most intense peaks

| #  | Immon.   | b               | b <sup>++</sup> | b <sup>*</sup> | b <sup>+++</sup> | b <sup>0</sup> | b <sup>0++</sup> | Seq. | y               | y <sup>++</sup> | y <sup>*</sup>  | y <sup>+++</sup> | y <sup>0</sup>  | y <sup>0++</sup> | #  |
|----|----------|-----------------|-----------------|----------------|------------------|----------------|------------------|------|-----------------|-----------------|-----------------|------------------|-----------------|------------------|----|
| 1  | 30.0338  | 58.0287         | 29.5180         |                |                  |                |                  | G    |                 |                 |                 |                  |                 |                  | 10 |
| 2  | 72.0808  | <b>157.0972</b> | 79.0522         |                |                  |                |                  | V    | 1045.5524       | 523.2798        | 1028.5259       | 514.7666         | 1027.5419       | 514.2746         | 9  |
| 3  | 74.0600  | 258.1448        | 129.5761        |                |                  | 240.1343       | 120.5708         | T    | <b>946.4840</b> | <b>473.7456</b> | 929.4575        | <b>465.2324</b>  | <b>928.4734</b> | 464.7404         | 8  |
| 4  | 101.0709 | 386.2034        | 193.6053        | 369.1769       | 185.0921         | 368.1928       | 184.6001         | Q    | <b>845.4363</b> | 423.2218        | <b>828.4098</b> | 414.7085         | <b>827.4258</b> | <b>414.2165</b>  | 7  |
| 5  | 86.0964  | 499.2875        | 250.1474        | 482.2609       | 241.6341         | 481.2769       | 241.1421         | I    | <b>717.3777</b> | 359.1925        | 700.3512        | 350.6792         | 699.3672        | 350.1872         | 6  |
| 6  | 88.0393  | 614.3144        | 307.6608        | 597.2879       | 299.1476         | 596.3039       | 298.6556         | D    | <b>604.2937</b> | 302.6505        | 587.2671        | 294.1372         | 586.2831        | 293.6452         | 5  |
| 7  | 87.0553  | 728.3573        | 364.6823        | 711.3308       | 356.1690         | 710.3468       | 355.6770         | N    | <b>489.2667</b> | 245.1370        | 472.2402        | 236.6237         | 471.2562        | 236.1317         | 4  |
| 8  | 88.0393  | 843.3843        | 422.1958        | 826.3577       | 413.6825         | 825.3737       | 413.1905         | D    | <b>375.2238</b> | 188.1155        | 358.1973        | 179.6023         | 357.2132        | 179.1103         | 3  |
| 9  | 86.0964  | <b>956.4684</b> | 478.7378        | 939.4418       | 470.2245         | 938.4578       | 469.7325         | L    | <b>260.1969</b> | 130.6021        | 243.1703        | 122.0888         |                 |                  | 2  |
| 10 | 101.1073 |                 |                 |                |                  |                |                  | K    | <b>147.1128</b> | 74.0600         | 130.0863        | 65.5468          |                 |                  | 1  |

MS/MS Fragmentation of **EAAFSLAEAK**

Found in **Q9Y5K8**, Q9Y5K8|VATD\_HUMAN Vacuolar proton pump subunit D OS=Homo sapiens  
 GN=ATP6V1D PE=1 SV=1

Match to Query 236: 1035.515420 from(518.764986,2+)

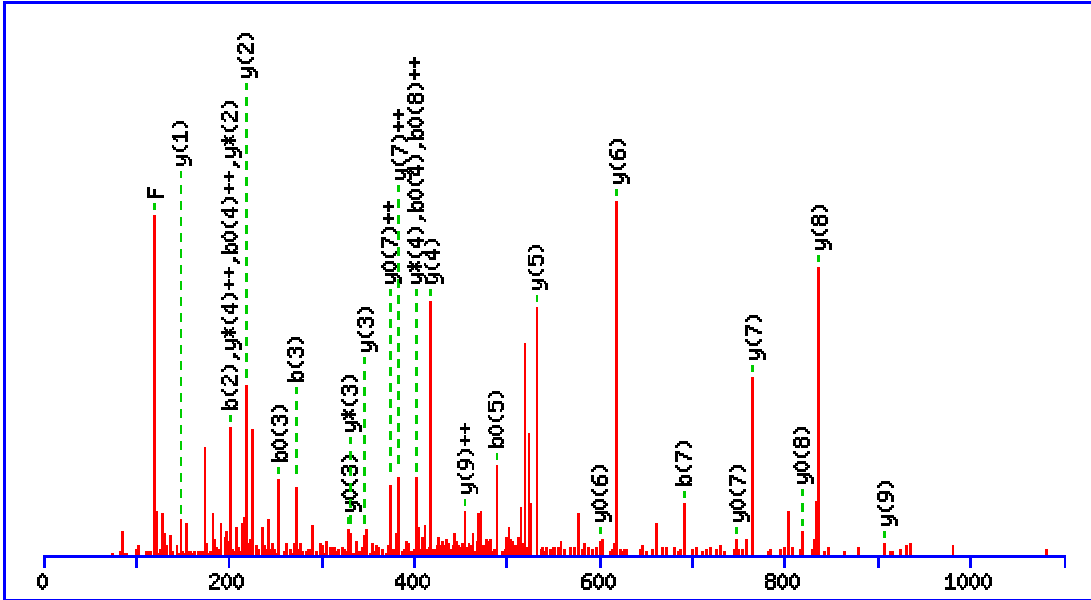

**Monoisotopic mass of neutral peptide Mr(calc):** 1035.5236

**Fixed modifications:** Carbamidomethyl (C)

**Ions Score:** 52 **Expect:** 0.00046

**Matches (Bold Red):** 29/96 fragment ions using 57 most intense peaks

| #  | Immon.          | b               | b <sup>++</sup> | b <sup>0</sup>  | b <sup>0++</sup> | Seq. | y               | y <sup>++</sup> | y*              | y <sup>*++</sup> | y <sup>0</sup>  | y <sup>0++</sup> | #  |
|----|-----------------|-----------------|-----------------|-----------------|------------------|------|-----------------|-----------------|-----------------|------------------|-----------------|------------------|----|
| 1  | 102.0550        | 130.0499        | 65.5286         | 112.0393        | 56.5233          | E    |                 |                 |                 |                  |                 |                  | 10 |
| 2  | 44.0495         | <b>201.0870</b> | 101.0471        | 183.0764        | 92.0418          | A    | <b>907.4884</b> | <b>454.2478</b> | 890.4618        | 445.7345         | 889.4778        | 445.2425         | 9  |
| 3  | 44.0495         | <b>272.1241</b> | 136.5657        | <b>254.1135</b> | 127.5604         | A    | <b>836.4512</b> | 418.7293        | 819.4247        | 410.2160         | <b>818.4407</b> | 409.7240         | 8  |
| 4  | <b>120.0808</b> | 419.1925        | 210.0999        | <b>401.1819</b> | <b>201.0946</b>  | F    | <b>765.4141</b> | <b>383.2107</b> | 748.3876        | 374.6974         | <b>747.4036</b> | <b>374.2054</b>  | 7  |
| 5  | 60.0444         | 506.2245        | 253.6159        | <b>488.2140</b> | 244.6106         | S    | <b>618.3457</b> | 309.6765        | 601.3192        | 301.1632         | <b>600.3352</b> | 300.6712         | 6  |
| 6  | 86.0964         | 619.3086        | 310.1579        | 601.2980        | 301.1527         | L    | <b>531.3137</b> | 266.1605        | 514.2871        | 257.6472         | 513.3031        | 257.1552         | 5  |
| 7  | 44.0495         | <b>690.3457</b> | 345.6765        | 672.3352        | 336.6712         | A    | <b>418.2296</b> | 209.6185        | <b>401.2031</b> | <b>201.1052</b>  | 400.2191        | 200.6132         | 4  |
| 8  | 102.0550        | 819.3883        | 410.1978        | 801.3777        | <b>401.1925</b>  | E    | <b>347.1925</b> | 174.0999        | <b>330.1660</b> | 165.5866         | <b>329.1819</b> | 165.0946         | 3  |
| 9  | 44.0495         | 890.4254        | 445.7164        | 872.4149        | 436.7111         | A    | <b>218.1499</b> | 109.5786        | <b>201.1234</b> | 101.0653         |                 |                  | 2  |
| 10 | 101.1073        |                 |                 |                 |                  | K    | <b>147.1128</b> | 74.0600         | 130.0863        | 65.5468          |                 |                  | 1  |

MS/MS Fragmentation of **NGNQAFNEDNLK**

Found in **Q9Y2Q5**, Q9Y2Q5|MAPIP\_HUMAN Mitogen-activated protein-binding protein-interacting protein  
 OS=Homo sapiens GN=MAPBPIP PE=2 SV=1

Match to Query 558: 1362.728758 from(682.371655,2+)

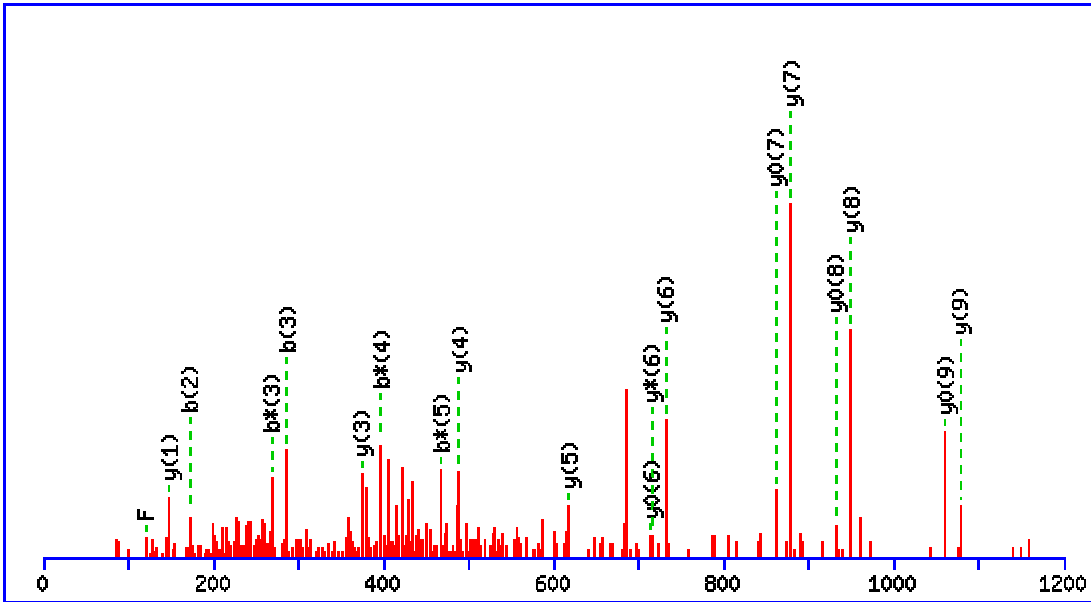

Monoisotopic mass of neutral peptide  $M_r(\text{calc})$ : 1362.6164

Fixed modifications: Carbamidomethyl (C)

Ions Score: 48 Expect: 0.001

Matches (Bold Red): 19/124 fragment ions using 34 most intense peaks

| #  | Immon.          | b               | b <sup>+</sup> | b*              | b <sup>+</sup> * | b <sup>0</sup> | b <sup>+</sup> * | Seq. | y                | y <sup>+</sup> | y*              | y <sup>+</sup> * | y <sup>0</sup>   | y <sup>+</sup> 0 | #  |
|----|-----------------|-----------------|----------------|-----------------|------------------|----------------|------------------|------|------------------|----------------|-----------------|------------------|------------------|------------------|----|
| 1  | 87.0553         | 115.0502        | 58.0287        | 98.0237         | 49.5155          |                |                  | N    |                  |                |                 |                  |                  |                  | 12 |
| 2  | 30.0338         | <b>172.0717</b> | 86.5395        | 155.0451        | 78.0262          |                |                  | G    | 1249.5808        | 625.2940       | 1232.5542       | 616.7807         | 1231.5702        | 616.2887         | 11 |
| 3  | 87.0553         | <b>286.1146</b> | 143.5609       | <b>269.0880</b> | 135.0477         |                |                  | N    | 1192.5593        | 596.7833       | 1175.5327       | 588.2700         | 1174.5487        | 587.7780         | 10 |
| 4  | 101.0709        | 414.1732        | 207.5902       | <b>397.1466</b> | 199.0769         |                |                  | Q    | <b>1078.5164</b> | 539.7618       | 1061.4898       | 531.2485         | <b>1060.5058</b> | 530.7565         | 9  |
| 5  | 44.0495         | 485.2103        | 243.1088       | <b>468.1837</b> | 234.5955         |                |                  | A    | <b>950.4578</b>  | 475.7325       | 933.4312        | 467.2193         | <b>932.4472</b>  | 466.7272         | 8  |
| 6  | <b>120.0808</b> | 632.2787        | 316.6430       | 615.2522        | 308.1297         |                |                  | F    | <b>879.4207</b>  | 440.2140       | 862.3941        | 431.7007         | <b>861.4101</b>  | 431.2087         | 7  |
| 7  | 87.0553         | 746.3216        | 373.6645       | 729.2951        | 365.1512         |                |                  | N    | <b>732.3523</b>  | 366.6798       | <b>715.3257</b> | 358.1665         | <b>714.3417</b>  | 357.6745         | 6  |
| 8  | 102.0550        | 875.3642        | 438.1857       | 858.3377        | 429.6725         | 857.3537       | 429.1805         | E    | <b>618.3093</b>  | 309.6583       | 601.2828        | 301.1450         | 600.2988         | 300.6530         | 5  |
| 9  | 88.0393         | 990.3912        | 495.6992       | 973.3646        | 487.1859         | 972.3806       | 486.6939         | D    | <b>489.2667</b>  | 245.1370       | 472.2402        | 236.6237         | 471.2562         | 236.1317         | 4  |
| 10 | 87.0553         | 1104.4341       | 552.7207       | 1087.4075       | 544.2074         | 1086.4235      | 543.7154         | N    | <b>374.2398</b>  | 187.6235       | 357.2132        | 179.1103         |                  |                  | 3  |
| 11 | 86.0964         | 1217.5182       | 609.2627       | 1200.4916       | 600.7494         | 1199.5076      | 600.2574         | L    | 260.1969         | 130.6021       | 243.1703        | 122.0888         |                  |                  | 2  |
| 12 | 101.1073        |                 |                |                 |                  |                |                  | K    | <b>147.1128</b>  | 74.0600        | 130.0863        | 65.5468          |                  |                  | 1  |

MS/MS Fragmentation of **IDATSASVLASR**

Found in **P13667**, P13667|PDIA4\_HUMAN Protein disulfide-isomerase A4 OS=Homo sapiens GN=PDIA4 PE=1 SV=2

Match to Query 196: 1189.476794 from(595.745673,2+)

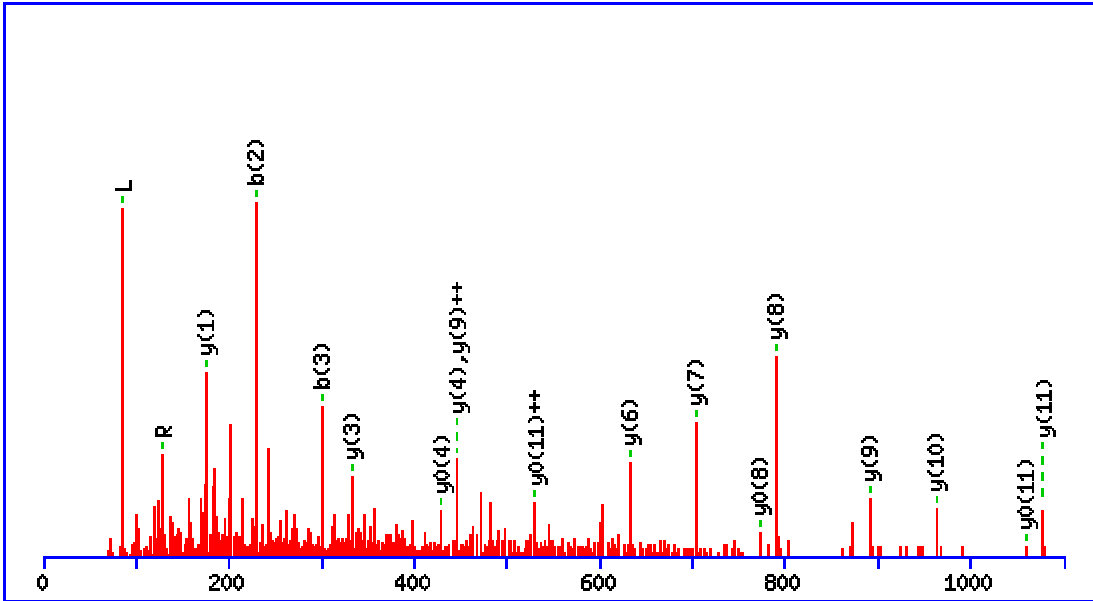

Monoisotopic mass of neutral peptide  $M_r(\text{calc})$ : 1189.6302

Fixed modifications: Carbamidomethyl (C)

Ions Score: 81 Expect: 6e-007

Matches (**Bold Red**): 19/118 fragment ions using 24 most intense peaks

| #  | Immon.          | b               | b <sup>++</sup> | b <sup>0</sup> | b <sup>0++</sup> | Seq. | y                | y <sup>++</sup> | y <sup>*</sup> | y <sup>*++</sup> | y <sup>0</sup>   | y <sup>0++</sup> | #  |
|----|-----------------|-----------------|-----------------|----------------|------------------|------|------------------|-----------------|----------------|------------------|------------------|------------------|----|
| 1  | <b>86.0964</b>  | 114.0913        | 57.5493         |                |                  | I    |                  |                 |                |                  |                  |                  | 12 |
| 2  | 88.0393         | <b>229.1183</b> | 115.0628        | 211.1077       | 106.0575         | D    | <b>1077.5535</b> | 539.2804        | 1060.5269      | 530.7671         | <b>1059.5429</b> | <b>530.2751</b>  | 11 |
| 3  | 44.0495         | <b>300.1554</b> | 150.5813        | 282.1448       | 141.5761         | A    | <b>962.5265</b>  | 481.7669        | 945.5000       | 473.2536         | 944.5160         | 472.7616         | 10 |
| 4  | 74.0600         | 401.2031        | 201.1052        | 383.1925       | 192.0999         | T    | <b>891.4894</b>  | <b>446.2483</b> | 874.4629       | 437.7351         | 873.4789         | 437.2431         | 9  |
| 5  | 60.0444         | 488.2351        | 244.6212        | 470.2245       | 235.6159         | S    | <b>790.4417</b>  | 395.7245        | 773.4152       | 387.2112         | <b>772.4312</b>  | 386.7192         | 8  |
| 6  | 44.0495         | 559.2722        | 280.1397        | 541.2617       | 271.1345         | A    | <b>703.4097</b>  | 352.2085        | 686.3832       | 343.6952         | 685.3991         | 343.2032         | 7  |
| 7  | 60.0444         | 646.3042        | 323.6558        | 628.2937       | 314.6505         | S    | <b>632.3726</b>  | 316.6899        | 615.3461       | 308.1767         | 614.3620         | 307.6847         | 6  |
| 8  | 72.0808         | 745.3727        | 373.1900        | 727.3621       | 364.1847         | V    | 545.3406         | 273.1739        | 528.3140       | 264.6606         | 527.3300         | 264.1686         | 5  |
| 9  | <b>86.0964</b>  | 858.4567        | 429.7320        | 840.4462       | 420.7267         | L    | <b>446.2722</b>  | 223.6397        | 429.2456       | 215.1264         | <b>428.2616</b>  | 214.6344         | 4  |
| 10 | 44.0495         | 929.4938        | 465.2506        | 911.4833       | 456.2453         | A    | <b>333.1881</b>  | 167.0977        | 316.1615       | 158.5844         | 315.1775         | 158.0924         | 3  |
| 11 | 60.0444         | 1016.5259       | 508.7666        | 998.5153       | 499.7613         | S    | 262.1510         | 131.5791        | 245.1244       | 123.0659         | 244.1404         | 122.5738         | 2  |
| 12 | <b>129.1135</b> |                 |                 |                |                  | R    | <b>175.1190</b>  | 88.0631         | 158.0924       | 79.5498          |                  |                  | 1  |

MS/MS Fragmentation of **VSQGQLVVMQPEK**

Found in **P13667**, P13667|PDIA4\_HUMAN Protein disulfide-isomerase A4 OS=Homo sapiens GN=PDIA4 PE=1 SV=2

Match to Query 338: 1457.869582 from(729.942067,2+)

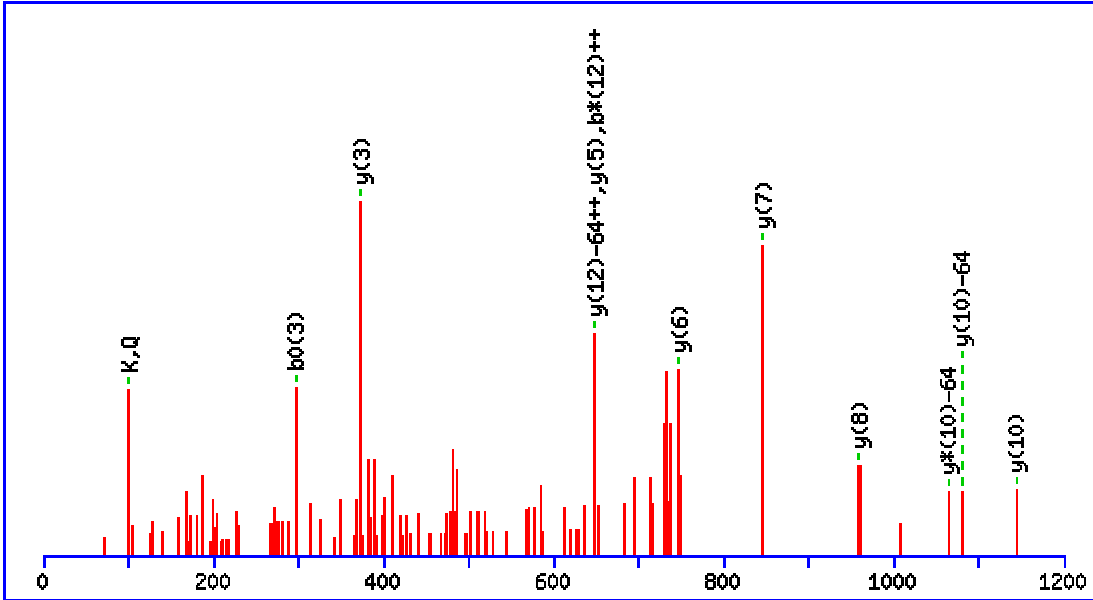

**Monoisotopic mass of neutral peptide Mr(calc):** 1457.7548

**Fixed modifications:** Carbamidomethyl (C)

**Variable modifications:**

**M9** : Oxidation (M), with neutral losses 0.0000(shown in table), 63.9983

**Ions Score:** 39 **Expect:** 0.0081

**Matches (Bold Red):** 15/222 fragment ions using 14 most intense peaks

| #  | Immon.          | b         | b <sup>++</sup> | b <sup>*</sup> | b <sup>***</sup> | b <sup>0</sup>  | b <sup>0++</sup> | Seq. | y                | y <sup>++</sup> | y <sup>*</sup> | y <sup>***</sup> | y <sup>0</sup> | y <sup>0++</sup> | #  |
|----|-----------------|-----------|-----------------|----------------|------------------|-----------------|------------------|------|------------------|-----------------|----------------|------------------|----------------|------------------|----|
| 1  | 72.0808         | 100.0757  | 50.5415         |                |                  |                 |                  | V    |                  |                 |                |                  |                |                  | 13 |
| 2  | 60.0444         | 187.1077  | 94.0575         |                |                  | 169.0972        | 85.0522          | S    | 1359.6937        | 680.3505        | 1342.6671      | 671.8372         | 1341.6831      | 671.3452         | 12 |
| 3  | <b>101.0709</b> | 315.1663  | 158.0868        | 298.1397       | 149.5735         | <b>297.1557</b> | 149.0815         | Q    | 1272.6617        | 636.8345        | 1255.6351      | 628.3212         | 1254.6511      | 627.8292         | 11 |
| 4  | 30.0338         | 372.1878  | 186.5975        | 355.1612       | 178.0842         | 354.1772        | 177.5922         | G    | <b>1144.6031</b> | 572.8052        | 1127.5765      | 564.2919         | 1126.5925      | 563.7999         | 10 |
| 5  | <b>101.0709</b> | 500.2463  | 250.6268        | 483.2198       | 242.1135         | 482.2358        | 241.6215         | Q    | 1087.5816        | 544.2944        | 1070.5551      | 535.7812         | 1069.5710      | 535.2892         | 9  |
| 6  | 86.0964         | 613.3304  | 307.1688        | 596.3039       | 298.6556         | 595.3198        | 298.1636         | L    | <b>959.5230</b>  | 480.2652        | 942.4965       | 471.7519         | 941.5125       | 471.2599         | 8  |
| 7  | 72.0808         | 712.3988  | 356.7030        | 695.3723       | 348.1898         | 694.3883        | 347.6978         | V    | <b>846.4390</b>  | 423.7231        | 829.4124       | 415.2098         | 828.4284       | 414.7178         | 7  |
| 8  | 72.0808         | 811.4672  | 406.2373        | 794.4407       | 397.7240         | 793.4567        | 397.2320         | V    | <b>747.3706</b>  | 374.1889        | 730.3440       | 365.6756         | 729.3600       | 365.1836         | 6  |
| 9  | 120.0478        | 958.5026  | 479.7550        | 941.4761       | 471.2417         | 940.4921        | 470.7497         | M    | <b>648.3021</b>  | 324.6547        | 631.2756       | 316.1414         | 630.2916       | 315.6494         | 5  |
| 10 | <b>101.0709</b> | 1086.5612 | 543.7842        | 1069.5347      | 535.2710         | 1068.5506       | 534.7790         | Q    | 501.2667         | 251.1370        | 484.2402       | 242.6237         | 483.2562       | 242.1317         | 4  |
| 11 | 70.0651         | 1183.6140 | 592.3106        | 1166.5874      | 583.7974         | 1165.6034       | 583.3053         | P    | <b>373.2082</b>  | 187.1077        | 356.1816       | 178.5944         | 355.1976       | 178.1024         | 3  |
| 12 | 102.0550        | 1312.6566 | 656.8319        | 1295.6300      | <b>648.3186</b>  | 1294.6460       | 647.8266         | E    | 276.1554         | 138.5813        | 259.1288       | 130.0681         | 258.1448       | 129.5761         | 2  |
| 13 | <b>101.1073</b> |           |                 |                |                  |                 |                  | K    | 147.1128         | 74.0600         | 130.0863       | 65.5468          |                |                  | 1  |

MS/MS Fragmentation of **FLTQPQVVAR**

Found in **O43760**, O43760|SNG2\_HUMAN Synaptogyrin-2 OS=Homo sapiens GN=SYNGR2 PE=1 SV=1

Match to Query 117: 1157.545278 from(579.779915,2+)

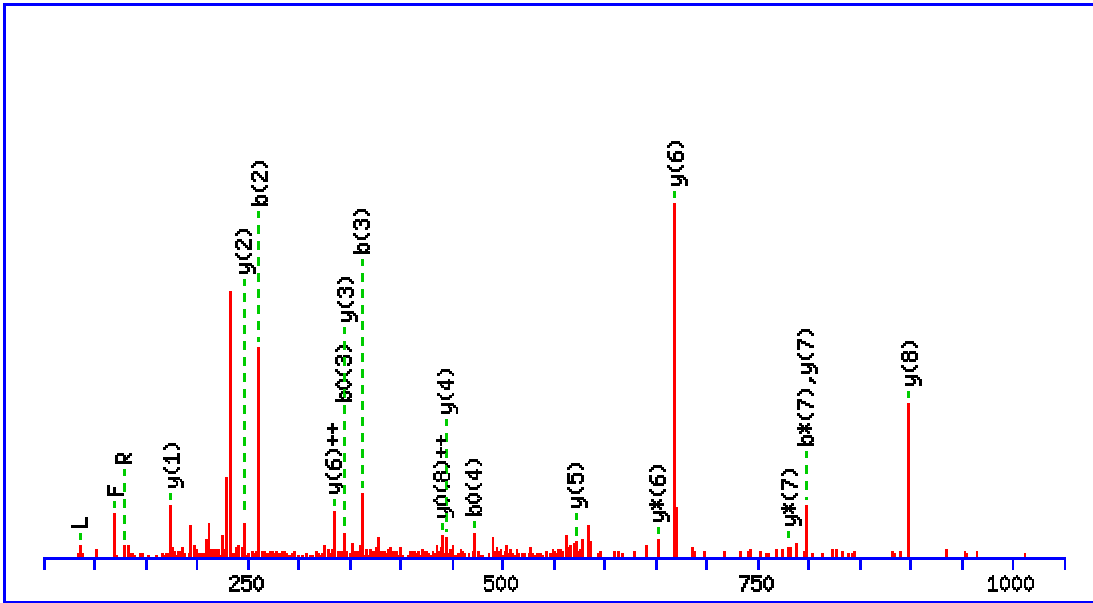

Monoisotopic mass of neutral peptide Mr(calc): 1157.6557

Fixed modifications: Carbamidomethyl (C)

Ions Score: 44 Expect: 0.0032

Matches (Bold Red): 20/94 fragment ions using 46 most intense peaks

| #  | Immon.          | b               | b <sup>++</sup> | b <sup>*</sup>  | b <sup>+++</sup> | b <sup>0</sup>  | b <sup>0++</sup> | Seq. | y               | y <sup>++</sup> | y <sup>*</sup>  | y <sup>+++</sup> | y <sup>0</sup> | y <sup>0++</sup> | #  |
|----|-----------------|-----------------|-----------------|-----------------|------------------|-----------------|------------------|------|-----------------|-----------------|-----------------|------------------|----------------|------------------|----|
| 1  | <b>120.0808</b> | 148.0757        | 74.5415         |                 |                  |                 |                  | F    |                 |                 |                 |                  |                |                  | 10 |
| 2  | <b>86.0964</b>  | <b>261.1598</b> | 131.0835        |                 |                  |                 |                  | L    | 1011.5946       | 506.3009        | 994.5680        | 497.7876         | 993.5840       | 497.2956         | 9  |
| 3  | 74.0600         | <b>362.2074</b> | 181.6074        |                 |                  | <b>344.1969</b> | 172.6021         | T    | <b>898.5105</b> | 449.7589        | 881.4839        | 441.2456         | 880.4999       | <b>440.7536</b>  | 8  |
| 4  | 101.0709        | 490.2660        | 245.6366        | 473.2395        | 237.1234         | <b>472.2554</b> | 236.6314         | Q    | <b>797.4628</b> | 399.2350        | <b>780.4363</b> | 390.7218         |                |                  | 7  |
| 5  | 70.0651         | 587.3188        | 294.1630        | 570.2922        | 285.6498         | 569.3082        | 285.1577         | P    | <b>669.4042</b> | <b>335.2058</b> | <b>652.3777</b> | 326.6925         |                |                  | 6  |
| 6  | 101.0709        | 715.3774        | 358.1923        | 698.3508        | 349.6790         | 697.3668        | 349.1870         | Q    | <b>572.3515</b> | 286.6794        | 555.3249        | 278.1661         |                |                  | 5  |
| 7  | 72.0808         | 814.4458        | 407.7265        | <b>797.4192</b> | 399.2132         | 796.4352        | 398.7212         | V    | <b>444.2929</b> | 222.6501        | 427.2663        | 214.1368         |                |                  | 4  |
| 8  | 72.0808         | 913.5142        | 457.2607        | 896.4876        | 448.7475         | 895.5036        | 448.2554         | V    | <b>345.2245</b> | 173.1159        | 328.1979        | 164.6026         |                |                  | 3  |
| 9  | 44.0495         | 984.5513        | 492.7793        | 967.5247        | 484.2660         | 966.5407        | 483.7740         | A    | <b>246.1561</b> | 123.5817        | 229.1295        | 115.0684         |                |                  | 2  |
| 10 | <b>129.1135</b> |                 |                 |                 |                  |                 |                  | R    | <b>175.1190</b> | 88.0631         | 158.0924        | 79.5498          |                |                  | 1  |

MS/MS Fragmentation of **VLQALEGLK**

Found in **P39019**, P39019|RS19\_HUMAN 40S ribosomal protein S19 OS=Homo sapiens GN=RPS19 PE=1 SV=2

Match to Query 230: 969.524674 from(485.769613,2+)

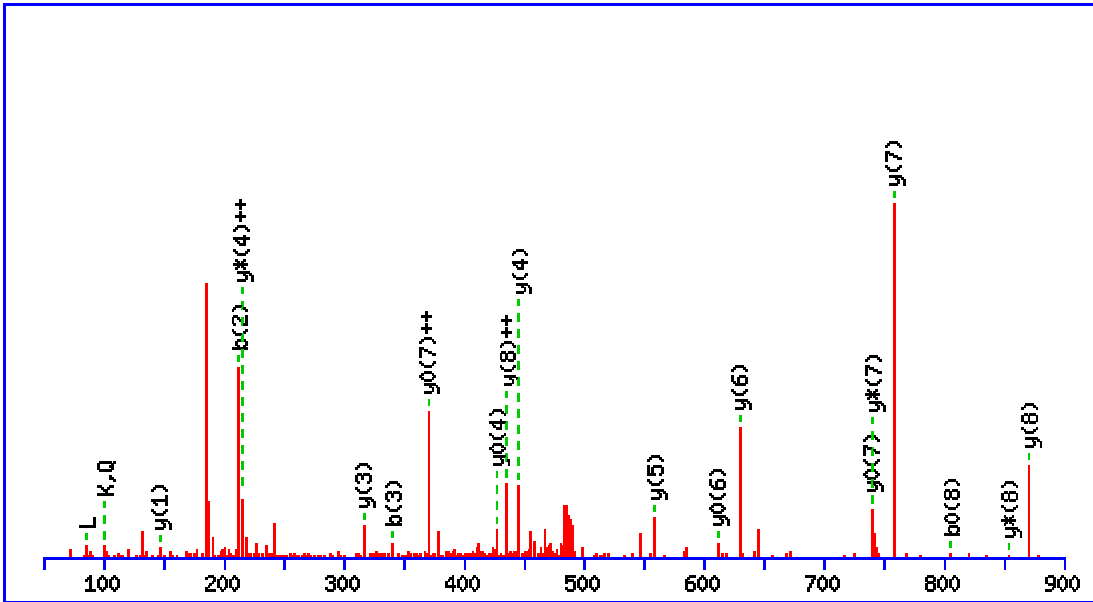

**Monoisotopic mass of neutral peptide Mr(calc):** 969.5859

**Fixed modifications:** Carbamidomethyl (C)

**Ions Score:** 49 **Expect:** 0.00093

**Matches (Bold Red):** 23/85 fragment ions using 37 most intense peaks

| # | Immon.          | b               | b <sup>++</sup> | b <sup>*</sup> | b <sup>*++</sup> | b <sup>0</sup>  | b <sup>0++</sup> | Seq. | y               | y <sup>++</sup> | y <sup>*</sup>  | y <sup>*++</sup> | y <sup>0</sup>  | y <sup>0++</sup> | # |
|---|-----------------|-----------------|-----------------|----------------|------------------|-----------------|------------------|------|-----------------|-----------------|-----------------|------------------|-----------------|------------------|---|
| 1 | 72.0808         | 100.0757        | 50.5415         |                |                  |                 |                  | V    |                 |                 |                 |                  |                 |                  | 9 |
| 2 | <b>86.0964</b>  | <b>213.1598</b> | 107.0835        |                |                  |                 |                  | L    | <b>871.5247</b> | <b>436.2660</b> | <b>854.4982</b> | 427.7527         | 853.5142        | 427.2607         | 8 |
| 3 | <b>101.0709</b> | <b>341.2183</b> | 171.1128        | 324.1918       | 162.5995         |                 |                  | Q    | <b>758.4407</b> | 379.7240        | <b>741.4141</b> | 371.2107         | <b>740.4301</b> | <b>370.7187</b>  | 7 |
| 4 | 44.0495         | 412.2554        | 206.6314        | 395.2289       | 198.1181         |                 |                  | A    | <b>630.3821</b> | 315.6947        | 613.3556        | 307.1814         | <b>612.3715</b> | 306.6894         | 6 |
| 5 | <b>86.0964</b>  | 525.3395        | 263.1734        | 508.3130       | 254.6601         |                 |                  | L    | <b>559.3450</b> | 280.1761        | 542.3184        | 271.6629         | 541.3344        | 271.1709         | 5 |
| 6 | 102.0550        | 654.3821        | 327.6947        | 637.3556       | 319.1814         | 636.3715        | 318.6894         | E    | <b>446.2609</b> | 223.6341        | 429.2344        | <b>215.1208</b>  | <b>428.2504</b> | 214.6288         | 4 |
| 7 | 30.0338         | 711.4036        | 356.2054        | 694.3770       | 347.6921         | 693.3930        | 347.2001         | G    | <b>317.2183</b> | 159.1128        | 300.1918        | 150.5995         |                 |                  | 3 |
| 8 | <b>86.0964</b>  | 824.4876        | 412.7475        | 807.4611       | 404.2342         | <b>806.4771</b> | 403.7422         | L    | 260.1969        | 130.6021        | 243.1703        | 122.0888         |                 |                  | 2 |
| 9 | <b>101.1073</b> |                 |                 |                |                  |                 |                  | K    | <b>147.1128</b> | 74.0600         | 130.0863        | 65.5468          |                 |                  | 1 |

MS/MS Fragmentation of **FAAATGATPIAGR**

Found in **P08865**, P08865|RSSA\_HUMAN 40S ribosomal protein SA OS=Homo sapiens GN=RPSA PE=1 SV=4

Match to Query 380: 1202.703798 from(602.359175,2,+)

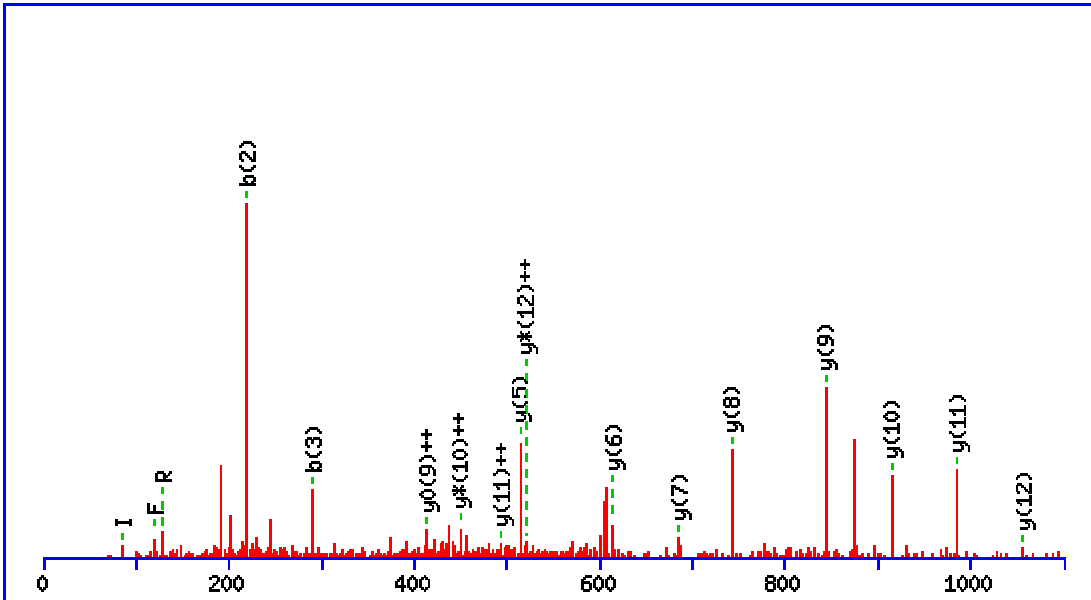

Monoisotopic mass of neutral peptide  $M_r(\text{calc})$ : 1202.6408

Fixed modifications: Carbamidomethyl (C)

Ions Score: 46 Expect: 0.0022

Matches (**Bold Red**): 17/115 fragment ions using 38 most intense peaks

| #  | Immon.          | b               | b <sup>++</sup> | b <sup>0</sup> | b <sup>0++</sup> | Seq. | y                | y <sup>++</sup> | y <sup>*</sup> | y <sup>*++</sup> | y <sup>0</sup> | y <sup>0++</sup> | #  |
|----|-----------------|-----------------|-----------------|----------------|------------------|------|------------------|-----------------|----------------|------------------|----------------|------------------|----|
| 1  | <b>120.0808</b> | 148.0757        | 74.5415         |                |                  | F    |                  |                 |                |                  |                |                  | 13 |
| 2  | 44.0495         | <b>219.1128</b> | 110.0600        |                |                  | A    | <b>1056.5796</b> | 528.7935        | 1039.5531      | <b>520.2802</b>  | 1038.5691      | 519.7882         | 12 |
| 3  | 44.0495         | <b>290.1499</b> | 145.5786        |                |                  | A    | <b>985.5425</b>  | <b>493.2749</b> | 968.5160       | 484.7616         | 967.5320       | 484.2696         | 11 |
| 4  | 44.0495         | 361.1870        | 181.0972        |                |                  | A    | <b>914.5054</b>  | 457.7563        | 897.4789       | <b>449.2431</b>  | 896.4948       | 448.7511         | 10 |
| 5  | 74.0600         | 462.2347        | 231.6210        | 444.2241       | 222.6157         | T    | <b>843.4683</b>  | 422.2378        | 826.4417       | 413.7245         | 825.4577       | <b>413.2325</b>  | 9  |
| 6  | 30.0338         | 519.2562        | 260.1317        | 501.2456       | 251.1264         | G    | <b>742.4206</b>  | 371.7139        | 725.3941       | 363.2007         | 724.4100       | 362.7087         | 8  |
| 7  | 44.0495         | 590.2933        | 295.6503        | 572.2827       | 286.6450         | A    | <b>685.3992</b>  | 343.2032        | 668.3726       | 334.6899         | 667.3886       | 334.1979         | 7  |
| 8  | 74.0600         | 691.3410        | 346.1741        | 673.3304       | 337.1688         | T    | <b>614.3620</b>  | 307.6847        | 597.3355       | 299.1714         | 596.3515       | 298.6794         | 6  |
| 9  | 70.0651         | 788.3937        | 394.7005        | 770.3832       | 385.6952         | P    | <b>513.3144</b>  | 257.1608        | 496.2878       | 248.6475         |                |                  | 5  |
| 10 | <b>86.0964</b>  | 901.4778        | 451.2425        | 883.4672       | 442.2373         | I    | 416.2616         | 208.6344        | 399.2350       | 200.1212         |                |                  | 4  |
| 11 | 44.0495         | 972.5149        | 486.7611        | 954.5043       | 477.7558         | A    | 303.1775         | 152.0924        | 286.1510       | 143.5791         |                |                  | 3  |
| 12 | 30.0338         | 1029.5364       | 515.2718        | 1011.5258      | 506.2665         | G    | 232.1404         | 116.5738        | 215.1139       | 108.0606         |                |                  | 2  |
| 13 | <b>129.1135</b> |                 |                 |                |                  | R    | 175.1190         | 88.0631         | 158.0924       | 79.5498          |                |                  | 1  |



MS/MS Fragmentation of **IALTDNALIAR**

Found in **P18124**, P18124|RL7\_HUMAN 60S ribosomal protein L7 OS=Homo sapiens GN=RPL7 PE=1 SV=1

Match to Query 472: 1169.643584 from(585.829068,2+)

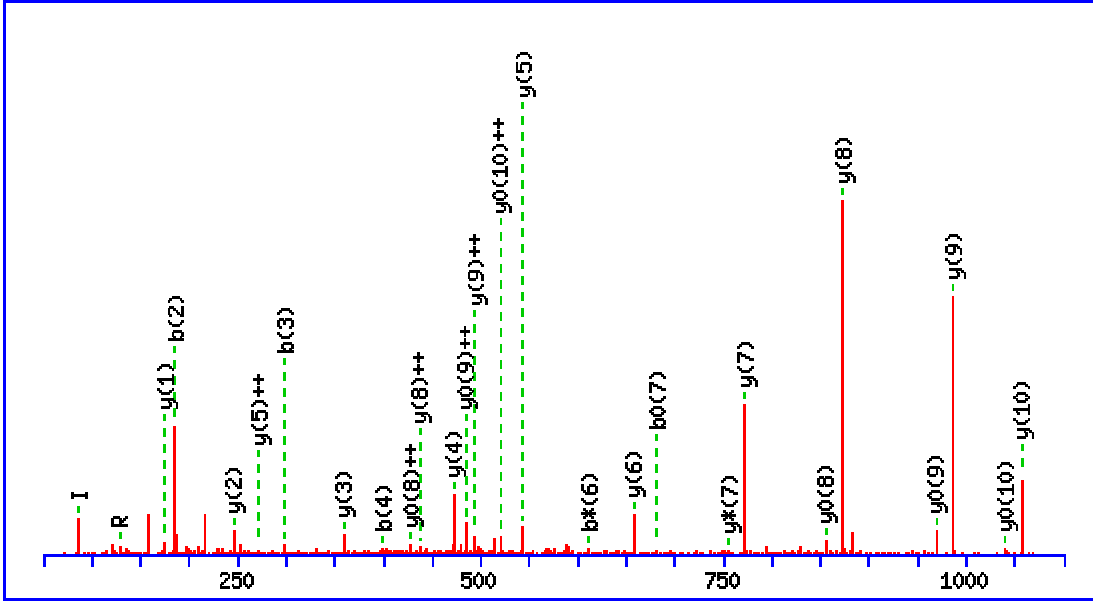

Monoisotopic mass of neutral peptide Mr(calc): 1169.6768

Fixed modifications: Carbamidomethyl (C)

Ions Score: 76 Expect: 1.8e-006

Matches (Bold Red): 30/103 fragment ions using 51 most intense peaks

| #  | Immon.          | b               | b <sup>++</sup> | b <sup>*</sup>  | b <sup>+++</sup> | b <sup>0</sup>  | b <sup>0++</sup> | Seq. | y                | y <sup>++</sup> | y <sup>*</sup>  | y <sup>+++</sup> | y <sup>0</sup>   | y <sup>0++</sup> | #  |
|----|-----------------|-----------------|-----------------|-----------------|------------------|-----------------|------------------|------|------------------|-----------------|-----------------|------------------|------------------|------------------|----|
| 1  | <b>86.0964</b>  | 114.0913        | 57.5493         |                 |                  |                 |                  | I    |                  |                 |                 |                  |                  |                  | 11 |
| 2  | 44.0495         | <b>185.1285</b> | 93.0679         |                 |                  |                 |                  | A    | <b>1057.6000</b> | 529.3037        | 1040.5735       | 520.7904         | <b>1039.5895</b> | <b>520.2984</b>  | 10 |
| 3  | <b>86.0964</b>  | <b>298.2125</b> | 149.6099        |                 |                  |                 |                  | L    | <b>986.5629</b>  | <b>493.7851</b> | 969.5364        | 485.2718         | <b>968.5524</b>  | <b>484.7798</b>  | 9  |
| 4  | 74.0600         | <b>399.2602</b> | 200.1337        |                 |                  | 381.2496        | 191.1285         | T    | <b>873.4789</b>  | <b>437.2431</b> | 856.4523        | 428.7298         | <b>855.4683</b>  | <b>428.2378</b>  | 8  |
| 5  | 88.0393         | 514.2871        | 257.6472        |                 |                  | 496.2766        | 248.6419         | D    | <b>772.4312</b>  | 386.7192        | <b>755.4046</b> | 378.2060         | 754.4206         | 377.7139         | 7  |
| 6  | 87.0553         | 628.3301        | 314.6687        | <b>611.3035</b> | 306.1554         | 610.3195        | 305.6634         | N    | <b>657.4042</b>  | 329.2058        | 640.3777        | 320.6925         |                  |                  | 6  |
| 7  | 44.0495         | 699.3672        | 350.1872        | 682.3406        | 341.6740         | <b>681.3566</b> | 341.1819         | A    | <b>543.3613</b>  | <b>272.1843</b> | 526.3348        | 263.6710         |                  |                  | 5  |
| 8  | <b>86.0964</b>  | 812.4512        | 406.7293        | 795.4247        | 398.2160         | 794.4407        | 397.7240         | L    | <b>472.3242</b>  | 236.6657        | 455.2976        | 228.1525         |                  |                  | 4  |
| 9  | <b>86.0964</b>  | 925.5353        | 463.2713        | 908.5088        | 454.7580         | 907.5247        | 454.2660         | I    | <b>359.2401</b>  | 180.1237        | 342.2136        | 171.6104         |                  |                  | 3  |
| 10 | 44.0495         | 996.5724        | 498.7898        | 979.5459        | 490.2766         | 978.5619        | 489.7846         | A    | <b>246.1561</b>  | 123.5817        | 229.1295        | 115.0684         |                  |                  | 2  |
| 11 | <b>129.1135</b> |                 |                 |                 |                  |                 |                  | R    | <b>175.1190</b>  | 88.0631         | 158.0924        | 79.5498          |                  |                  | 1  |

MS/MS Fragmentation of **AGLVDDFEK**

Found in **O75947**, O75947|ATP5H\_HUMAN ATP synthase subunit d, mitochondrial OS=Homo sapiens  
 GN=ATP5H PE=1 SV=3

Match to Query 139: 992.441310 from(497.227931,2+)

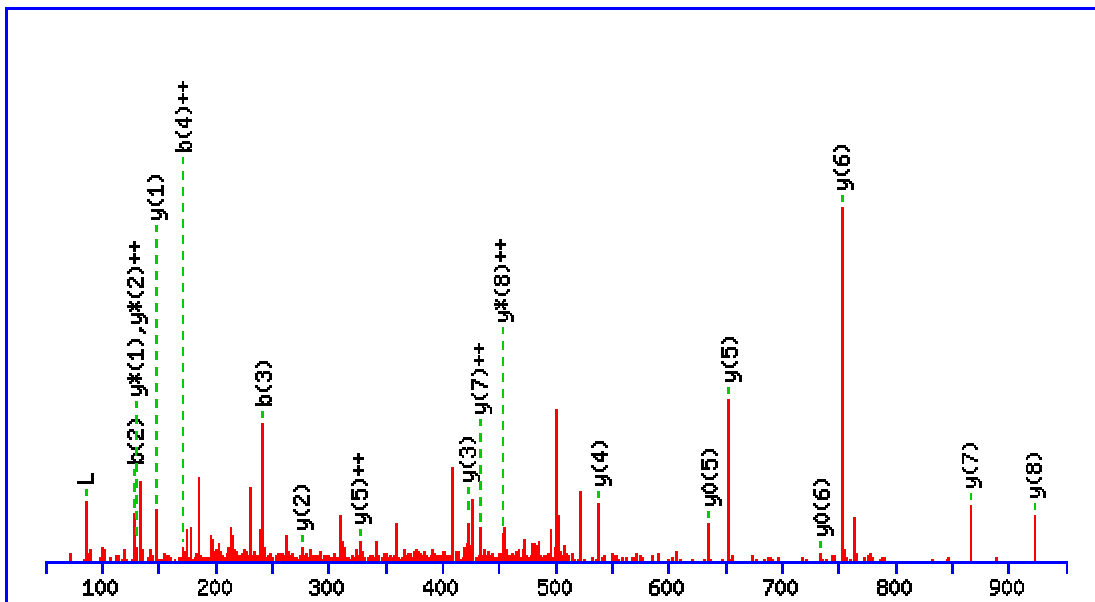

Monoisotopic mass of neutral peptide Mr(calc): 992.4815

Fixed modifications: Carbamidomethyl (C)

Ions Score: 40 Expect: 0.0073

Matches (Bold Red): 19/79 fragment ions using 59 most intense peaks

| # | Immon.         | b               | b <sup>++</sup> | b <sup>0</sup> | b <sup>0++</sup> | Seq. | y               | y <sup>++</sup> | y <sup>*</sup>  | y <sup>*++</sup> | y <sup>0</sup>  | y <sup>0++</sup> | # |
|---|----------------|-----------------|-----------------|----------------|------------------|------|-----------------|-----------------|-----------------|------------------|-----------------|------------------|---|
| 1 | 44.0495        | 72.0444         | 36.5258         |                |                  | A    |                 |                 |                 |                  |                 |                  | 9 |
| 2 | 30.0338        | <b>129.0659</b> | 65.0366         |                |                  | G    | <b>922.4516</b> | 461.7295        | 905.4251        | <b>453.2162</b>  | 904.4411        | 452.7242         | 8 |
| 3 | <b>86.0964</b> | <b>242.1499</b> | 121.5786        |                |                  | L    | <b>865.4302</b> | <b>433.2187</b> | 848.4036        | 424.7055         | 847.4196        | 424.2134         | 7 |
| 4 | 72.0808        | 341.2183        | <b>171.1128</b> |                |                  | V    | <b>752.3461</b> | 376.6767        | 735.3196        | 368.1634         | <b>734.3355</b> | 367.6714         | 6 |
| 5 | 88.0393        | 456.2453        | 228.6263        | 438.2347       | 219.6210         | D    | <b>653.2777</b> | <b>327.1425</b> | 636.2511        | 318.6292         | <b>635.2671</b> | 318.1372         | 5 |
| 6 | 88.0393        | 571.2722        | 286.1397        | 553.2617       | 277.1345         | D    | <b>538.2508</b> | 269.6290        | 521.2242        | 261.1157         | 520.2402        | 260.6237         | 4 |
| 7 | 120.0808       | 718.3406        | 359.6740        | 700.3301       | 350.6687         | F    | <b>423.2238</b> | 212.1155        | 406.1973        | 203.6023         | 405.2132        | 203.1103         | 3 |
| 8 | 102.0550       | 847.3832        | 424.1953        | 829.3727       | 415.1900         | E    | <b>276.1554</b> | 138.5813        | 259.1288        | <b>130.0681</b>  | 258.1448        | 129.5761         | 2 |
| 9 | 101.1073       |                 |                 |                |                  | K    | <b>147.1128</b> | 74.0600         | <b>130.0863</b> | 65.5468          |                 |                  | 1 |

MS/MS Fragmentation of **VLIEGSINSVR**

Found in **P59998**, P59998|ARPC4\_HUMAN Actin-related protein 2/3 complex subunit 4 OS=Homo sapiens  
 GN=ARPC4 PE=1 SV=3

Match to Query 401: 1185.624560 from(593.819556,2+)

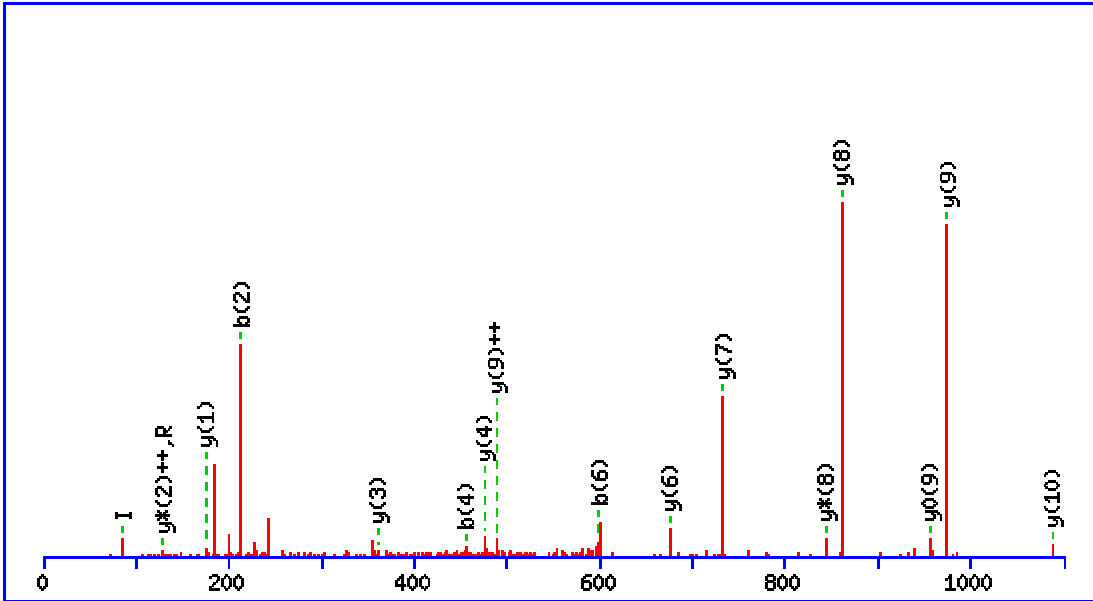

Monoisotopic mass of neutral peptide **Mr(calc)**: 1185.6717

Fixed modifications: Carbamidomethyl (C)

Ions Score: 54 Expect: 0.00029

Matches (**Bold Red**): 19/107 fragment ions using 23 most intense peaks

| #  | Immon.          | b               | b <sup>++</sup> | b <sup>*</sup> | b <sup>*++</sup> | b <sup>0</sup> | b <sup>0++</sup> | Seq. | y                | y <sup>++</sup> | y <sup>*</sup>  | y <sup>*++</sup> | y <sup>0</sup>  | y <sup>0++</sup> | #  |
|----|-----------------|-----------------|-----------------|----------------|------------------|----------------|------------------|------|------------------|-----------------|-----------------|------------------|-----------------|------------------|----|
| 1  | 72.0808         | 100.0757        | 50.5415         |                |                  |                |                  | V    |                  |                 |                 |                  |                 |                  | 11 |
| 2  | <b>86.0964</b>  | <b>213.1598</b> | 107.0835        |                |                  |                |                  | L    | <b>1087.6106</b> | 544.3089        | 1070.5840       | 535.7957         | 1069.6000       | 535.3037         | 10 |
| 3  | <b>86.0964</b>  | 326.2438        | 163.6255        |                |                  |                |                  | I    | <b>974.5265</b>  | <b>487.7669</b> | 957.5000        | 479.2536         | <b>956.5160</b> | 478.7616         | 9  |
| 4  | 102.0550        | <b>455.2864</b> | 228.1468        |                |                  | 437.2758       | 219.1416         | E    | <b>861.4425</b>  | 431.2249        | <b>844.4159</b> | 422.7116         | 843.4319        | 422.2196         | 8  |
| 5  | 30.0338         | 512.3079        | 256.6576        |                |                  | 494.2973       | 247.6523         | G    | <b>732.3999</b>  | 366.7036        | 715.3733        | 358.1903         | 714.3893        | 357.6983         | 7  |
| 6  | 60.0444         | <b>599.3399</b> | 300.1736        |                |                  | 581.3293       | 291.1683         | S    | <b>675.3784</b>  | 338.1928        | 658.3519        | 329.6796         | 657.3678        | 329.1876         | 6  |
| 7  | <b>86.0964</b>  | 712.4240        | 356.7156        |                |                  | 694.4134       | 347.7103         | I    | 588.3464         | 294.6768        | 571.3198        | 286.1636         | 570.3358        | 285.6715         | 5  |
| 8  | 87.0553         | 826.4669        | 413.7371        | 809.4403       | 405.2238         | 808.4563       | 404.7318         | N    | <b>475.2623</b>  | 238.1348        | 458.2358        | 229.6215         | 457.2518        | 229.1295         | 4  |
| 9  | 60.0444         | 913.4989        | 457.2531        | 896.4724       | 448.7398         | 895.4884       | 448.2478         | S    | <b>361.2194</b>  | 181.1133        | 344.1928        | 172.6001         | 343.2088        | 172.1081         | 3  |
| 10 | 72.0808         | 1012.5673       | 506.7873        | 995.5408       | 498.2740         | 994.5568       | 497.7820         | V    | 274.1874         | 137.5973        | 257.1608        | <b>129.0840</b>  |                 |                  | 2  |
| 11 | <b>129.1135</b> |                 |                 |                |                  |                |                  | R    | <b>175.1190</b>  | 88.0631         | 158.0924        | 79.5498          |                 |                  | 1  |

MS/MS Fragmentation of **IEEELGSK**

Found in **P06733**, P06733|ENOA\_HUMAN Alpha-enolase OS=Homo sapiens GN=ENO1 PE=1 SV=2

Match to Query 35: 903.304444 from(452.659498,2+)

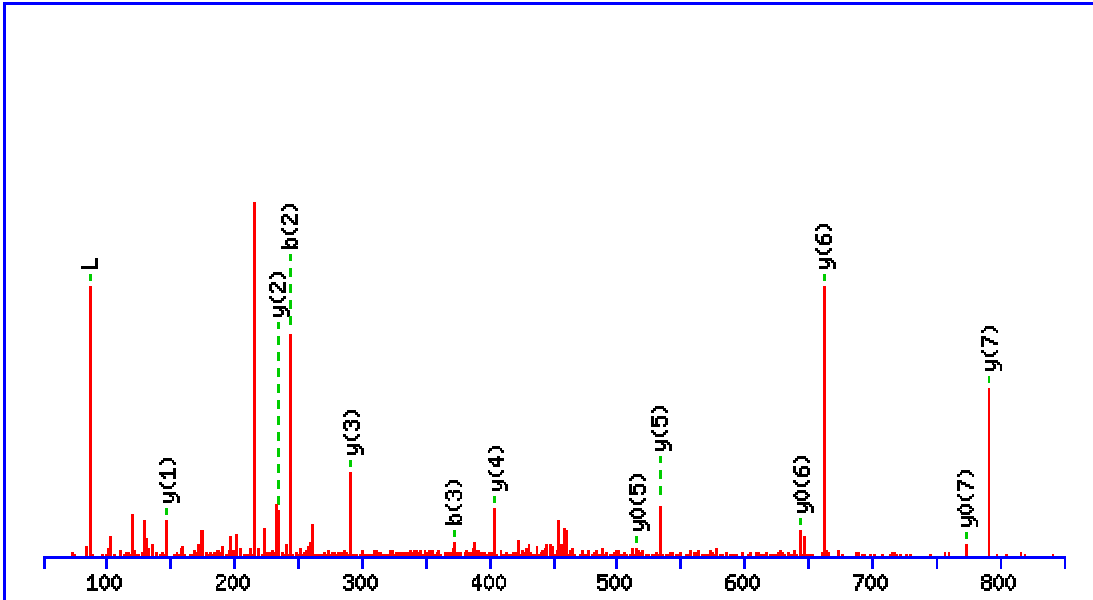

Monoisotopic mass of neutral peptide Mr(calc): 903.4549

Fixed modifications: Carbamidomethyl (C)

Ions Score: 42 Expect: 0.005

Matches (Bold Red): 14/74 fragment ions using 35 most intense peaks

| # | Immon.         | b               | b <sup>++</sup> | b <sup>0</sup> | b <sup>0++</sup> | Seq. | y               | y <sup>++</sup> | y <sup>*</sup> | y <sup>*++</sup> | y <sup>0</sup>  | y <sup>0++</sup> | # |
|---|----------------|-----------------|-----------------|----------------|------------------|------|-----------------|-----------------|----------------|------------------|-----------------|------------------|---|
| 1 | <b>86.0964</b> | 114.0913        | 57.5493         |                |                  | I    |                 |                 |                |                  |                 |                  | 8 |
| 2 | 102.0550       | <b>243.1339</b> | 122.0706        | 225.1234       | 113.0653         | E    | <b>791.3781</b> | 396.1927        | 774.3516       | 387.6794         | <b>773.3676</b> | 387.1874         | 7 |
| 3 | 102.0550       | <b>372.1765</b> | 186.5919        | 354.1660       | 177.5866         | E    | <b>662.3355</b> | 331.6714        | 645.3090       | 323.1581         | <b>644.3250</b> | 322.6661         | 6 |
| 4 | 102.0550       | 501.2191        | 251.1132        | 483.2086       | 242.1079         | E    | <b>533.2930</b> | 267.1501        | 516.2664       | 258.6368         | <b>515.2824</b> | 258.1448         | 5 |
| 5 | <b>86.0964</b> | 614.3032        | 307.6552        | 596.2926       | 298.6499         | L    | <b>404.2504</b> | 202.6288        | 387.2238       | 194.1155         | 386.2398        | 193.6235         | 4 |
| 6 | 30.0338        | 671.3246        | 336.1660        | 653.3141       | 327.1607         | G    | <b>291.1663</b> | 146.0868        | 274.1397       | 137.5735         | 273.1557        | 137.0815         | 3 |
| 7 | 60.0444        | 758.3567        | 379.6820        | 740.3461       | 370.6767         | S    | <b>234.1448</b> | 117.5761        | 217.1183       | 109.0628         | 216.1343        | 108.5708         | 2 |
| 8 | 101.1073       |                 |                 |                |                  | K    | <b>147.1128</b> | 74.0600         | 130.0863       | 65.5468          |                 |                  | 1 |

MS/MS Fragmentation of **EGLELLK**

Found in **P06733**, P06733|ENOA\_HUMAN Alpha-enolase OS=Homo sapiens GN=ENO1 PE=1 SV=2

Match to Query 58: 800.442244 from(401.228398,2+)

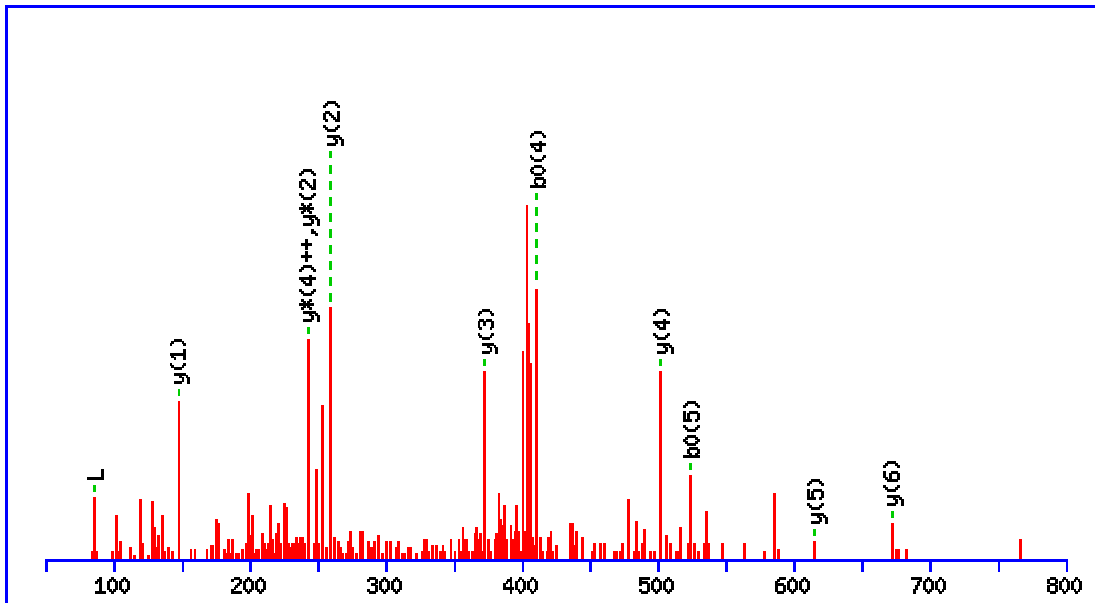

Monoisotopic mass of neutral peptide Mr(calc): 800.4643

Fixed modifications: Carbamidomethyl (C)

Ions Score: 35 Expect: 0.035

Matches (**Bold Red**): 13/61 fragment ions using 20 most intense peaks

| # | Immon.         | b        | b <sup>++</sup> | b <sup>0</sup>  | b <sup>0++</sup> | Seq.     | y               | y <sup>++</sup> | y <sup>*</sup>  | y <sup>*++</sup> | y <sup>0</sup> | y <sup>0++</sup> | # |
|---|----------------|----------|-----------------|-----------------|------------------|----------|-----------------|-----------------|-----------------|------------------|----------------|------------------|---|
| 1 | 102.0550       | 130.0499 | 65.5286         | 112.0393        | 56.5233          | <b>E</b> |                 |                 |                 |                  |                |                  | 7 |
| 2 | 30.0338        | 187.0713 | 94.0393         | 169.0608        | 85.0340          | <b>G</b> | <b>672.4291</b> | 336.7182        | 655.4025        | 328.2049         | 654.4185       | 327.7129         | 6 |
| 3 | <b>86.0964</b> | 300.1554 | 150.5813        | 282.1448        | 141.5761         | <b>L</b> | <b>615.4076</b> | 308.2074        | 598.3810        | 299.6942         | 597.3970       | 299.2022         | 5 |
| 4 | 102.0550       | 429.1980 | 215.1026        | <b>411.1874</b> | 206.0974         | <b>E</b> | <b>502.3235</b> | 251.6654        | 485.2970        | <b>243.1521</b>  | 484.3130       | 242.6601         | 4 |
| 5 | <b>86.0964</b> | 542.2821 | 271.6447        | <b>524.2715</b> | 262.6394         | <b>L</b> | <b>373.2809</b> | 187.1441        | 356.2544        | 178.6308         |                |                  | 3 |
| 6 | <b>86.0964</b> | 655.3661 | 328.1867        | 637.3556        | 319.1814         | <b>L</b> | <b>260.1969</b> | 130.6021        | <b>243.1703</b> | 122.0888         |                |                  | 2 |
| 7 | 101.1073       |          |                 |                 |                  | <b>K</b> | <b>147.1128</b> | 74.0600         | 130.0863        | 65.5468          |                |                  | 1 |

MS/MS Fragmentation of **SETDLLDIR**

Found in **P50995**, P50995|ANX11\_HUMAN Annexin A11 OS=Homo sapiens GN=ANXA11 PE=1 SV=1

Match to Query 414: 1060.505664 from(531.260108,2+)

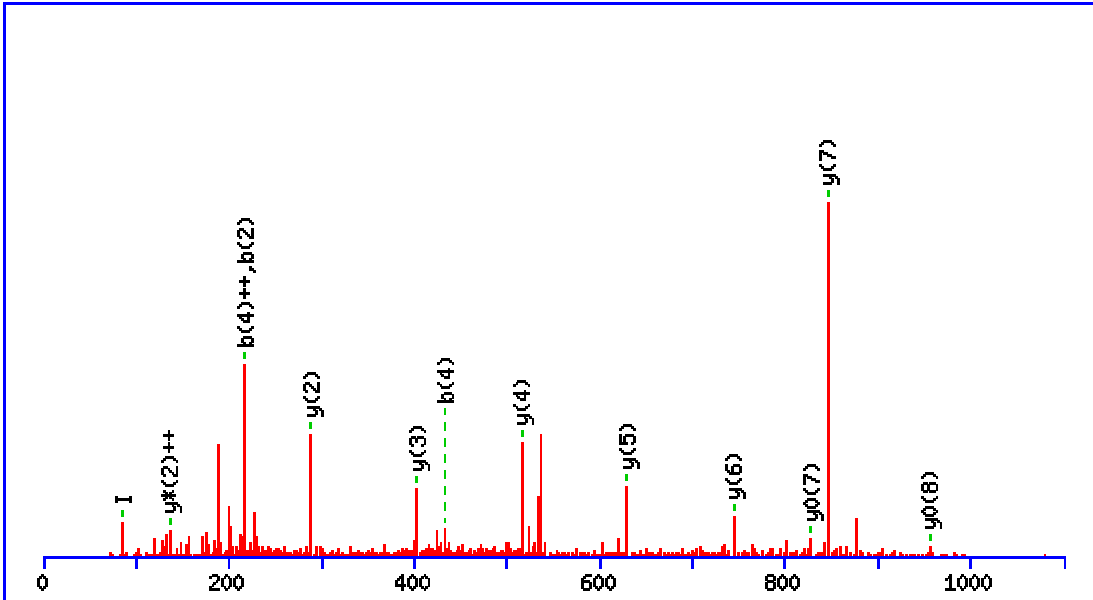

**Monoisotopic mass of neutral peptide Mr(calc):** 1060.5400

**Fixed modifications:** Carbamidomethyl (C)

**Ions Score:** 41 **Expect:** 0.0072

**Matches (Bold Red):** 15/85 fragment ions using 22 most intense peaks

| # | Immon.         | b               | b <sup>++</sup> | b <sup>0</sup> | b <sup>0++</sup> | Seq. | y               | y <sup>++</sup> | y <sup>*</sup> | y <sup>*++</sup> | y <sup>0</sup>  | y <sup>0++</sup> | # |
|---|----------------|-----------------|-----------------|----------------|------------------|------|-----------------|-----------------|----------------|------------------|-----------------|------------------|---|
| 1 | 60.0444        | 88.0393         | 44.5233         | 70.0287        | 35.5180          | S    |                 |                 |                |                  |                 |                  | 9 |
| 2 | 102.0550       | <b>217.0819</b> | 109.0446        | 199.0713       | 100.0393         | E    | 974.5153        | 487.7613        | 957.4888       | 479.2480         | <b>956.5047</b> | 478.7560         | 8 |
| 3 | 74.0600        | 318.1296        | 159.5684        | 300.1190       | 150.5631         | T    | <b>845.4727</b> | 423.2400        | 828.4462       | 414.7267         | <b>827.4621</b> | 414.2347         | 7 |
| 4 | 88.0393        | <b>433.1565</b> | <b>217.0819</b> | 415.1460       | 208.0766         | D    | <b>744.4250</b> | 372.7162        | 727.3985       | 364.2029         | 726.4145        | 363.7109         | 6 |
| 5 | <b>86.0964</b> | 546.2406        | 273.6239        | 528.2300       | 264.6186         | L    | <b>629.3981</b> | 315.2027        | 612.3715       | 306.6894         | 611.3875        | 306.1974         | 5 |
| 6 | <b>86.0964</b> | 659.3246        | 330.1660        | 641.3141       | 321.1607         | L    | <b>516.3140</b> | 258.6606        | 499.2875       | 250.1474         | 498.3035        | 249.6554         | 4 |
| 7 | 88.0393        | 774.3516        | 387.6794        | 756.3410       | 378.6742         | D    | <b>403.2300</b> | 202.1186        | 386.2034       | 193.6053         | 385.2194        | 193.1133         | 3 |
| 8 | <b>86.0964</b> | 887.4357        | 444.2215        | 869.4251       | 435.2162         | I    | <b>288.2030</b> | 144.6051        | 271.1765       | <b>136.0919</b>  |                 |                  | 2 |
| 9 | 129.1135       |                 |                 |                |                  | R    | 175.1190        | 88.0631         | 158.0924       | 79.5498          |                 |                  | 1 |

MS/MS Fragmentation of **FYALSASFEPFSNK**

Found in **P27797**, P27797|CALR\_HUMAN Calreticulin OS=Homo sapiens GN=CALR PE=1 SV=1

Match to Query 710: 1606.751640 from(804.383096,2+)

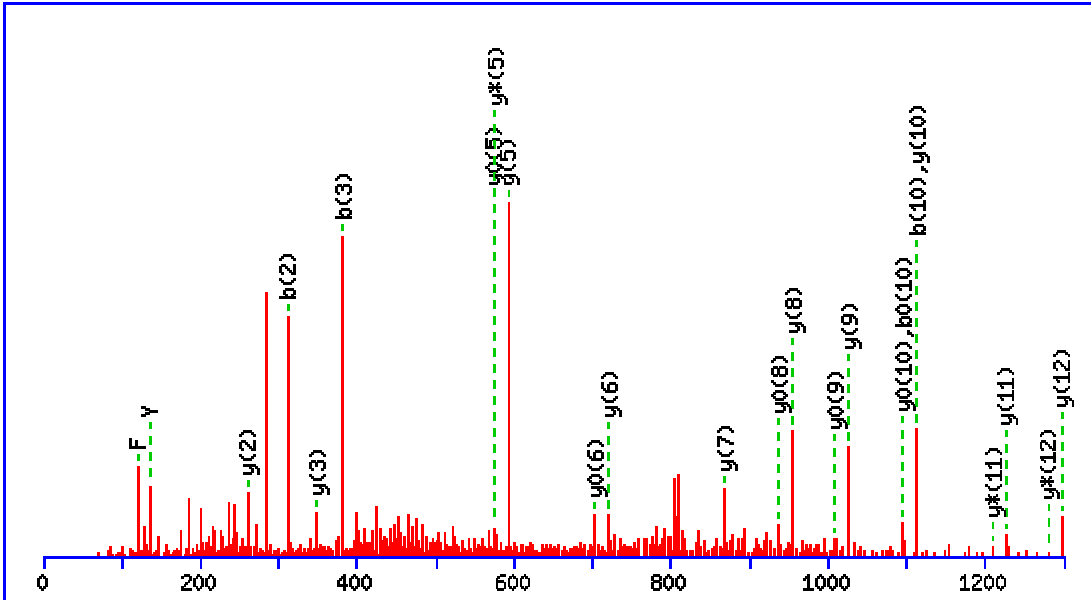

Monoisotopic mass of neutral peptide  $M_r(\text{calc})$ : 1606.7667

Fixed modifications: Carbamidomethyl (C)

Ions Score: 66 Expect: 1.6e-005

Matches (Bold Red): 26/134 fragment ions using 49 most intense peaks

| #  | Immon.          | b                | b <sup>++</sup> | b*        | b <sup>+++</sup> | b <sup>0</sup>   | b <sup>++</sup> | Seq. | y                | y <sup>++</sup> | y*               | y <sup>+++</sup> | y <sup>0</sup>   | y <sup>0++</sup> | #  |
|----|-----------------|------------------|-----------------|-----------|------------------|------------------|-----------------|------|------------------|-----------------|------------------|------------------|------------------|------------------|----|
| 1  | <b>120.0808</b> | 148.0757         | 74.5415         |           |                  |                  |                 | F    |                  |                 |                  |                  |                  |                  | 14 |
| 2  | <b>136.0757</b> | <b>311.1390</b>  | 156.0731        |           |                  |                  |                 | Y    | 1460.7056        | 730.8564        | 1443.6791        | 722.3432         | 1442.6951        | 721.8512         | 13 |
| 3  | 44.0495         | <b>382.1761</b>  | 191.5917        |           |                  |                  |                 | A    | <b>1297.6423</b> | 649.3248        | <b>1280.6157</b> | 640.8115         | 1279.6317        | 640.3195         | 12 |
| 4  | 86.0964         | 495.2602         | 248.1337        |           |                  |                  |                 | L    | <b>1226.6052</b> | 613.8062        | <b>1209.5786</b> | 605.2930         | 1208.5946        | 604.8009         | 11 |
| 5  | 60.0444         | 582.2922         | 291.6498        |           |                  | 564.2817         | 282.6445        | S    | <b>1113.5211</b> | 557.2642        | 1096.4946        | 548.7509         | <b>1095.5105</b> | 548.2589         | 10 |
| 6  | 44.0495         | 653.3293         | 327.1683        |           |                  | 635.3188         | 318.1630        | A    | <b>1026.4891</b> | 513.7482        | 1009.4625        | 505.2349         | <b>1008.4785</b> | 504.7429         | 9  |
| 7  | 60.0444         | 740.3614         | 370.6843        |           |                  | 722.3508         | 361.6790        | S    | <b>955.4520</b>  | 478.2296        | 938.4254         | 469.7163         | <b>937.4414</b>  | 469.2243         | 8  |
| 8  | <b>120.0808</b> | 887.4298         | 444.2185        |           |                  | 869.4192         | 435.2132        | F    | <b>868.4199</b>  | 434.7136        | 851.3934         | 426.2003         | 850.4094         | 425.7083         | 7  |
| 9  | 102.0550        | 1016.4724        | 508.7398        |           |                  | 998.4618         | 499.7345        | E    | <b>721.3515</b>  | 361.1794        | 704.3250         | 352.6661         | <b>703.3410</b>  | 352.1741         | 6  |
| 10 | 70.0651         | <b>1113.5251</b> | 557.2662        |           |                  | <b>1095.5146</b> | 548.2609        | P    | <b>592.3089</b>  | 296.6581        | <b>575.2824</b>  | 288.1448         | <b>574.2984</b>  | 287.6528         | 5  |
| 11 | <b>120.0808</b> | 1260.5936        | 630.8004        |           |                  | 1242.5830        | 621.7951        | F    | 495.2562         | 248.1317        | 478.2296         | 239.6185         | 477.2456         | 239.1264         | 4  |
| 12 | 60.0444         | 1347.6256        | 674.3164        |           |                  | 1329.6150        | 665.3111        | S    | <b>348.1878</b>  | 174.5975        | 331.1612         | 166.0842         | 330.1772         | 165.5922         | 3  |
| 13 | 87.0553         | 1461.6685        | 731.3379        | 1444.6420 | 722.8246         | 1443.6579        | 722.3326        | N    | <b>261.1557</b>  | 131.0815        | 244.1292         | 122.5682         |                  |                  | 2  |
| 14 | 101.1073        |                  |                 |           |                  |                  |                 | K    | 147.1128         | 74.0600         | 130.0863         | 65.5468          |                  |                  | 1  |

MS/MS Fragmentation of **ATNMTVSAIR**

Found in **P23786**, P23786|CPT2\_HUMAN Carnitine O-palmitoyltransferase 2, mitochondrial OS=Homo sapiens GN=CPT2 PE=1 SV=2

Match to Query 299: 1078.558952 from(540.286752,2+)

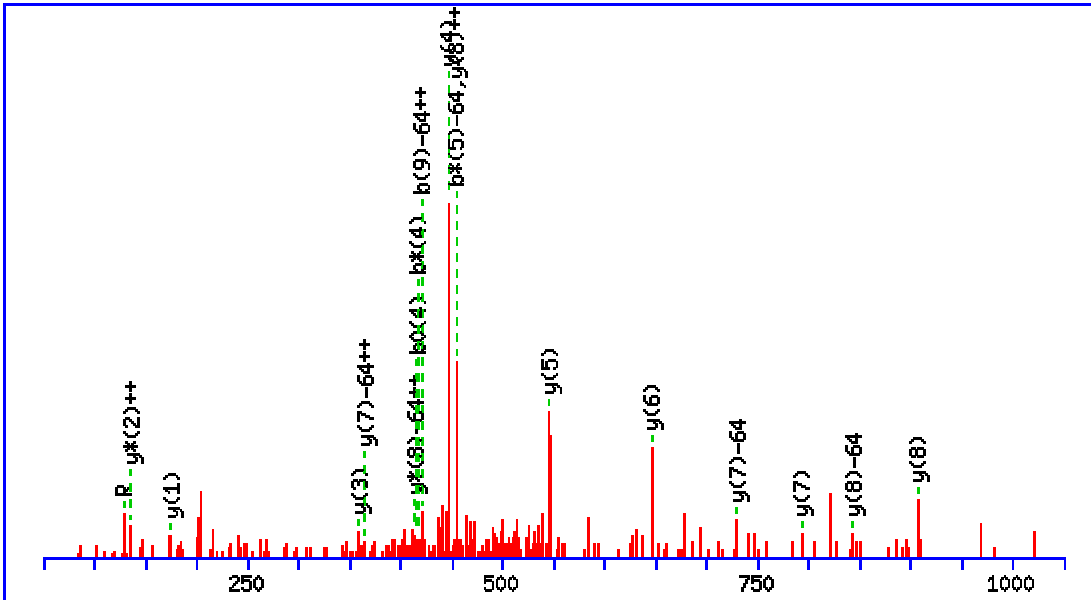

Monoisotopic mass of neutral peptide Mr(calc): 1078.5441

Fixed modifications: Carbamidomethyl (C)

Variable modifications:

M4 : Oxidation (M), with neutral losses 63.9983(shown in table), 0.0000

Ions Score: 39 Expect: 0.0096

Matches (Bold Red): 18/161 fragment ions using 45 most intense peaks

| #  | Immon.          | b        | b <sup>++</sup> | b*              | b <sup>+++</sup> | b <sup>0</sup> | b <sup>0++</sup> | Seq. | y               | y <sup>++</sup> | y*       | y <sup>+++</sup> | y <sup>0</sup> | y <sup>0++</sup> | #  |
|----|-----------------|----------|-----------------|-----------------|------------------|----------------|------------------|------|-----------------|-----------------|----------|------------------|----------------|------------------|----|
| 1  | 44.0495         | 72.0444  | 36.5258         |                 |                  |                |                  | A    |                 |                 |          |                  |                |                  | 10 |
| 2  | 74.0600         | 173.0921 | 87.0497         |                 |                  | 155.0815       | 78.0444          | T    | 944.5160        | 472.7616        | 927.4894 | 464.2484         | 926.5054       | 463.7563         | 9  |
| 3  | 87.0553         | 287.1350 | 144.0711        | 270.1084        | 135.5579         | 269.1244       | 135.0659         | N    | <b>843.4683</b> | 422.2378        | 826.4417 | <b>413.7245</b>  | 825.4577       | 413.2325         | 8  |
| 4  | 56.0495         | 370.1721 | 185.5897        | 353.1456        | 177.0764         | 352.1615       | 176.5844         | M    | <b>729.4254</b> | <b>365.2163</b> | 712.3988 | 356.7030         | 711.4148       | 356.2110         | 7  |
| 5  | 74.0600         | 471.2198 | 236.1135        | <b>454.1932</b> | 227.6003         | 453.2092       | 227.1083         | T    | <b>646.3883</b> | 323.6978        | 629.3617 | 315.1845         | 628.3777       | 314.6925         | 6  |
| 6  | 72.0808         | 570.2882 | 285.6477        | 553.2617        | 277.1345         | 552.2776       | 276.6425         | V    | <b>545.3406</b> | 273.1739        | 528.3140 | 264.6606         | 527.3300       | 264.1686         | 5  |
| 7  | 60.0444         | 657.3202 | 329.1638        | 640.2937        | 320.6505         | 639.3097       | 320.1585         | S    | <b>446.2722</b> | 223.6397        | 429.2456 | 215.1264         | 428.2616       | 214.6344         | 4  |
| 8  | 44.0495         | 728.3573 | 364.6823        | 711.3308        | 356.1690         | 710.3468       | 355.6770         | A    | <b>359.2401</b> | 180.1237        | 342.2136 | 171.6104         |                |                  | 3  |
| 9  | 86.0964         | 841.4414 | <b>421.2243</b> | 824.4149        | 412.7111         | 823.4308       | 412.2191         | I    | 288.2030        | 144.6051        | 271.1765 | <b>136.0919</b>  |                |                  | 2  |
| 10 | <b>129.1135</b> |          |                 |                 |                  |                |                  | R    | <b>175.1190</b> | 88.0631         | 158.0924 | 79.5498          |                |                  | 1  |



MS/MS Fragmentation of **EALENANTNTEVLK**

Found in **Q9H444**, Q9H444|CHM4B\_HUMAN Charged multivesicular body protein 4b OS=Homo sapiens  
GN=CHMP4B PE=1 SV=1

Match to Query 687: 1544.690262 from(773.352407,2+)

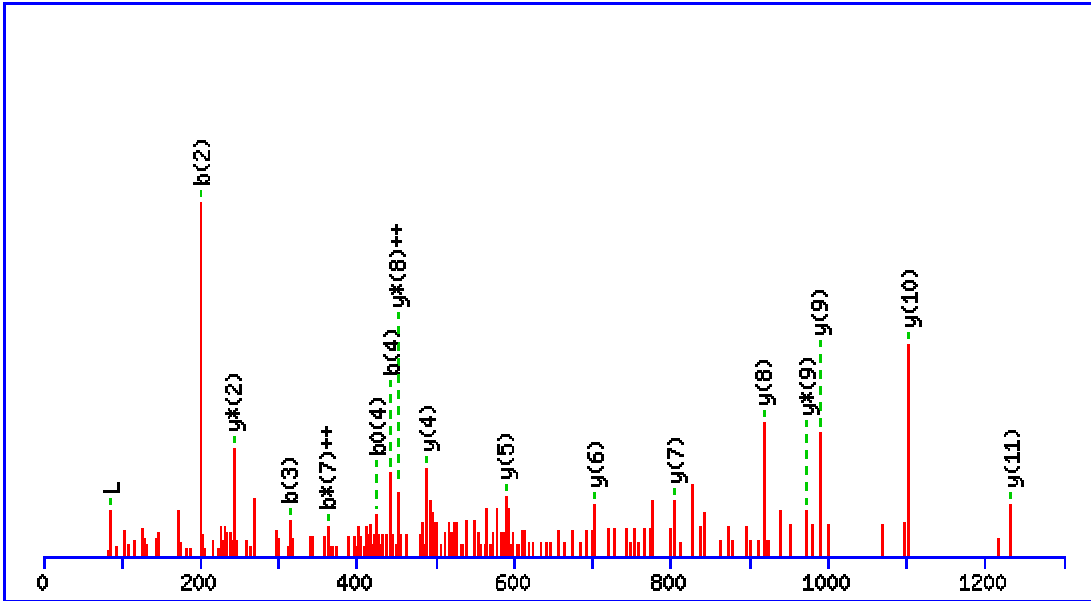

Monoisotopic mass of neutral peptide Mr(calc): 1544.7682

Fixed modifications: Carbamidomethyl (C)

Ions Score: 57 Expect: 0.00014

Matches (Bold Red): 18/156 fragment ions using 31 most intense peaks

| #  | Immon.         | b               | b <sup>++</sup> | b*        | b <sup>*++</sup> | b <sup>0</sup>  | b <sup>0++</sup> | Seq. | y                | y <sup>++</sup> | y*              | y <sup>*++</sup> | y <sup>0</sup> | y <sup>0++</sup> | #  |
|----|----------------|-----------------|-----------------|-----------|------------------|-----------------|------------------|------|------------------|-----------------|-----------------|------------------|----------------|------------------|----|
| 1  | 102.0550       | 130.0499        | 65.5286         |           |                  | 112.0393        | 56.5233          | E    |                  |                 |                 |                  |                |                  | 14 |
| 2  | 44.0495        | <b>201.0870</b> | 101.0471        |           |                  | 183.0764        | 92.0418          | A    | 1416.7329        | 708.8701        | 1399.7063       | 700.3568         | 1398.7223      | 699.8648         | 13 |
| 3  | <b>86.0964</b> | <b>314.1710</b> | 157.5892        |           |                  | 296.1605        | 148.5839         | L    | 1345.6958        | 673.3515        | 1328.6692       | 664.8383         | 1327.6852      | 664.3462         | 12 |
| 4  | 102.0550       | <b>443.2136</b> | 222.1105        |           |                  | <b>425.2031</b> | 213.1052         | E    | <b>1232.6117</b> | 616.8095        | 1215.5852       | 608.2962         | 1214.6012      | 607.8042         | 11 |
| 5  | 87.0553        | 557.2566        | 279.1319        | 540.2300  | 270.6186         | 539.2460        | 270.1266         | N    | <b>1103.5691</b> | 552.2882        | 1086.5426       | 543.7749         | 1085.5586      | 543.2829         | 10 |
| 6  | 44.0495        | 628.2937        | 314.6505        | 611.2671  | 306.1372         | 610.2831        | 305.6452         | A    | <b>989.5262</b>  | 495.2667        | <b>972.4997</b> | 486.7535         | 971.5156       | 486.2615         | 9  |
| 7  | 87.0553        | 742.3366        | 371.6719        | 725.3101  | <b>363.1587</b>  | 724.3260        | 362.6667         | N    | <b>918.4891</b>  | 459.7482        | 901.4625        | <b>451.2349</b>  | 900.4785       | 450.7429         | 8  |
| 8  | 74.0600        | 843.3843        | 422.1958        | 826.3577  | 413.6825         | 825.3737        | 413.1905         | T    | <b>804.4462</b>  | 402.7267        | 787.4196        | 394.2134         | 786.4356       | 393.7214         | 7  |
| 9  | 87.0553        | 957.4272        | 479.2172        | 940.4007  | 470.7040         | 939.4166        | 470.2120         | N    | <b>703.3985</b>  | 352.2029        | 686.3719        | 343.6896         | 685.3879       | 343.1976         | 6  |
| 10 | 74.0600        | 1058.4749       | 529.7411        | 1041.4483 | 521.2278         | 1040.4643       | 520.7358         | T    | <b>589.3556</b>  | 295.1814        | 572.3290        | 286.6681         | 571.3450       | 286.1761         | 5  |
| 11 | 102.0550       | 1187.5175       | 594.2624        | 1170.4909 | 585.7491         | 1169.5069       | 585.2571         | E    | <b>488.3079</b>  | 244.6576        | 471.2813        | 236.1443         | 470.2973       | 235.6523         | 4  |
| 12 | 72.0808        | 1286.5859       | 643.7966        | 1269.5594 | 635.2833         | 1268.5753       | 634.7913         | V    | 359.2653         | 180.1363        | 342.2387        | 171.6230         |                |                  | 3  |
| 13 | <b>86.0964</b> | 1399.6700       | 700.3386        | 1382.6434 | 691.8253         | 1381.6594       | 691.3333         | L    | 260.1969         | 130.6021        | <b>243.1703</b> | 122.0888         |                |                  | 2  |
| 14 | 101.1073       |                 |                 |           |                  |                 |                  | K    | 147.1128         | 74.0600         | 130.0863        | 65.5468          |                |                  | 1  |

MS/MS Fragmentation of **LEALDANSR**

Found in **P09496**, P09496|CLCA\_HUMAN Clathrin light chain A OS=Homo sapiens GN=CLTA PE=1 SV=1

Match to Query 275: 987.431450 from(494.723001,2+)

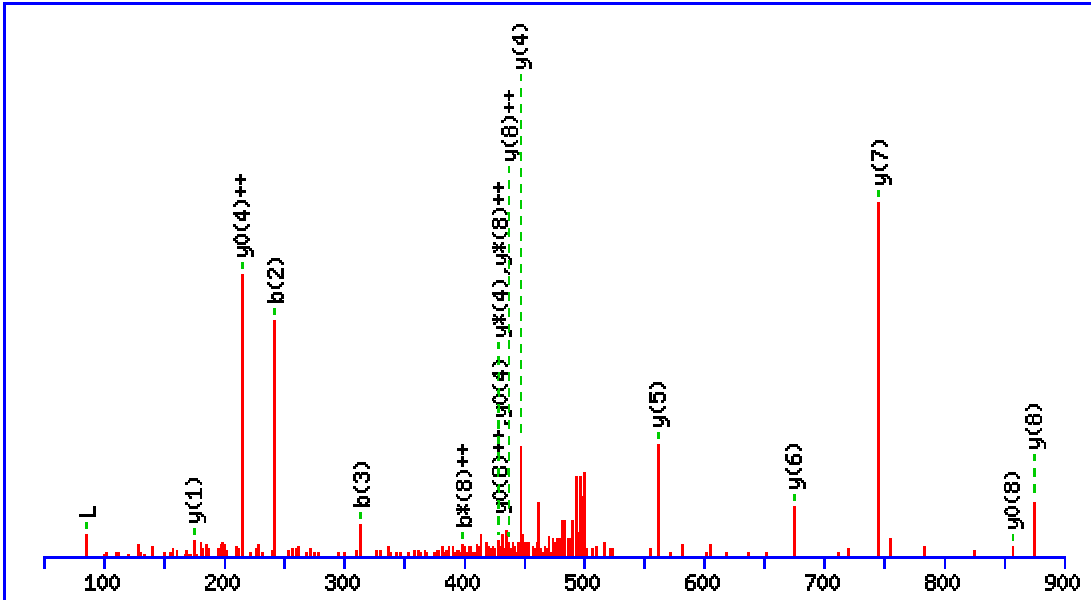

Monoisotopic mass of neutral peptide Mr(calc): 987.4985

Fixed modifications: Carbamidomethyl (C)

Ions Score: 49 Expect: 0.0013

Matches (Bold Red): 18/89 fragment ions using 47 most intense peaks

| # | Immon.         | b               | b <sup>++</sup> | b <sup>*</sup> | b <sup>*++</sup> | b <sup>0</sup> | b <sup>0++</sup> | Seq. | y               | y <sup>++</sup> | y <sup>*</sup>  | y <sup>*++</sup> | y <sup>0</sup>  | y <sup>0++</sup> | # |
|---|----------------|-----------------|-----------------|----------------|------------------|----------------|------------------|------|-----------------|-----------------|-----------------|------------------|-----------------|------------------|---|
| 1 | <b>86.0964</b> | 114.0913        | 57.5493         |                |                  |                |                  | L    |                 |                 |                 |                  |                 |                  | 9 |
| 2 | 102.0550       | <b>243.1339</b> | 122.0706        |                |                  | 225.1234       | 113.0653         | E    | <b>875.4217</b> | <b>438.2145</b> | 858.3952        | <b>429.7012</b>  | <b>857.4112</b> | <b>429.2092</b>  | 8 |
| 3 | 44.0495        | <b>314.1710</b> | 157.5892        |                |                  | 296.1605       | 148.5839         | A    | <b>746.3791</b> | 373.6932        | 729.3526        | 365.1799         | 728.3686        | 364.6879         | 7 |
| 4 | <b>86.0964</b> | 427.2551        | 214.1312        |                |                  | 409.2445       | 205.1259         | L    | <b>675.3420</b> | 338.1747        | 658.3155        | 329.6614         | 657.3315        | 329.1694         | 6 |
| 5 | 88.0393        | 542.2821        | 271.6447        |                |                  | 524.2715       | 262.6394         | D    | <b>562.2580</b> | 281.6326        | 545.2314        | 273.1193         | 544.2474        | 272.6273         | 5 |
| 6 | 44.0495        | 613.3192        | 307.1632        |                |                  | 595.3086       | 298.1579         | A    | <b>447.2310</b> | 224.1191        | <b>430.2045</b> | 215.6059         | <b>429.2205</b> | <b>215.1139</b>  | 4 |
| 7 | 87.0553        | 727.3621        | 364.1847        | 710.3355       | 355.6714         | 709.3515       | 355.1794         | N    | 376.1939        | 188.6006        | 359.1674        | 180.0873         | 358.1833        | 179.5953         | 3 |
| 8 | 60.0444        | 814.3941        | 407.7007        | 797.3676       | <b>399.1874</b>  | 796.3836       | 398.6954         | S    | 262.1510        | 131.5791        | 245.1244        | 123.0659         | 244.1404        | 122.5738         | 2 |
| 9 | 129.1135       |                 |                 |                |                  |                |                  | R    | <b>175.1190</b> | 88.0631         | 158.0924        | 79.5498          |                 |                  | 1 |

MS/MS Fragmentation of **QSISSNSESGPR**

Found in **P04839**, P04839|CY24B\_HUMAN Cytochrome b-245 heavy chain OS=Homo sapiens GN=CYBB  
 PE=1 SV=2

Match to Query 552: 1160.520506 from(581.267529,2+)

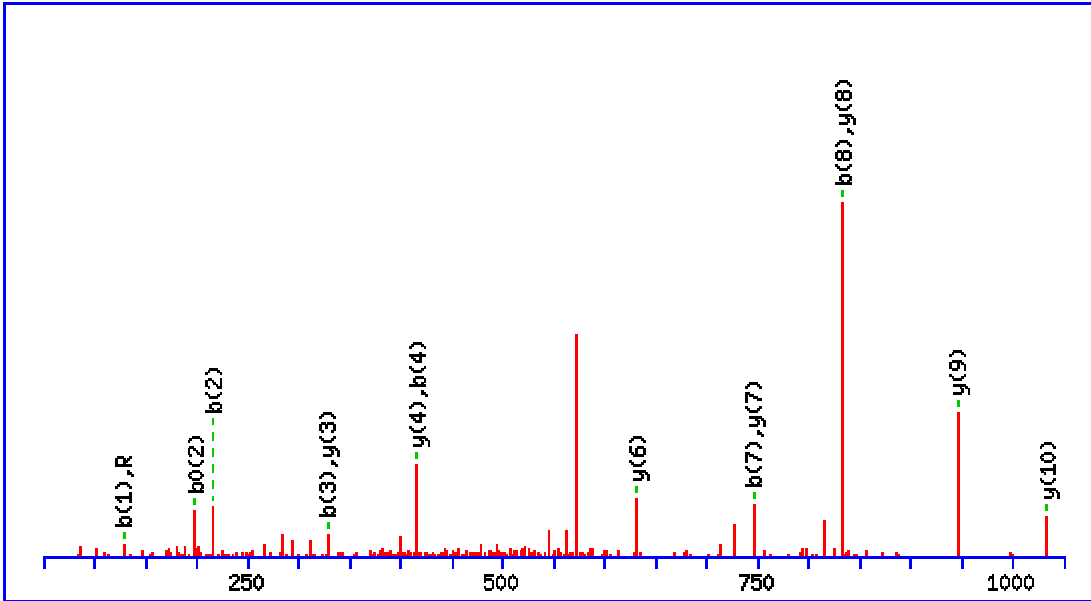

**Monoisotopic mass of neutral peptide Mr(calc):** 1160.5422

**Fixed modifications:** Carbamidomethyl (C)

**Ions Score:** 77 **Expect:** 1.7e-006

**Matches (Bold Red):** 15/123 fragment ions using 11 most intense peaks

| #  | Immon.          | b               | b <sup>++</sup> | b*       | b <sup>+++</sup> | b <sup>0</sup>  | b <sup>0++</sup> | Seq. | y                | y <sup>++</sup> | y*        | y <sup>+++</sup> | y <sup>0</sup> | y <sup>0++</sup> | #  |
|----|-----------------|-----------------|-----------------|----------|------------------|-----------------|------------------|------|------------------|-----------------|-----------|------------------|----------------|------------------|----|
| 1  | 101.0709        | <b>129.0659</b> | 65.0366         | 112.0393 | 56.5233          |                 |                  | Q    |                  |                 |           |                  |                |                  | 11 |
| 2  | 60.0444         | <b>216.0979</b> | 108.5526        | 199.0713 | 100.0393         | <b>198.0873</b> | 99.5473          | S    | <b>1033.4909</b> | 517.2491        | 1016.4643 | 508.7358         | 1015.4803      | 508.2438         | 10 |
| 3  | 86.0964         | <b>329.1819</b> | 165.0946        | 312.1554 | 156.5813         | 311.1714        | 156.0893         | I    | <b>946.4588</b>  | 473.7331        | 929.4323  | 465.2198         | 928.4483       | 464.7278         | 9  |
| 4  | 60.0444         | <b>416.2140</b> | 208.6106        | 399.1874 | 200.0974         | 398.2034        | 199.6053         | S    | <b>833.3748</b>  | 417.1910        | 816.3482  | 408.6778         | 815.3642       | 408.1857         | 8  |
| 5  | 87.0553         | 530.2569        | 265.6321        | 513.2304 | 257.1188         | 512.2463        | 256.6268         | N    | <b>746.3428</b>  | 373.6750        | 729.3162  | 365.1617         | 728.3322       | 364.6697         | 7  |
| 6  | 60.0444         | 617.2889        | 309.1481        | 600.2624 | 300.6348         | 599.2784        | 300.1428         | S    | <b>632.2998</b>  | 316.6536        | 615.2733  | 308.1403         | 614.2893       | 307.6483         | 6  |
| 7  | 102.0550        | <b>746.3315</b> | 373.6694        | 729.3050 | 365.1561         | 728.3210        | 364.6641         | E    | 545.2678         | 273.1375        | 528.2413  | 264.6243         | 527.2572       | 264.1323         | 5  |
| 8  | 60.0444         | <b>833.3635</b> | 417.1854        | 816.3370 | 408.6721         | 815.3530        | 408.1801         | S    | <b>416.2252</b>  | 208.6162        | 399.1987  | 200.1030         | 398.2146       | 199.6110         | 4  |
| 9  | 30.0338         | 890.3850        | 445.6961        | 873.3585 | 437.1829         | 872.3744        | 436.6909         | G    | <b>329.1932</b>  | 165.1002        | 312.1666  | 156.5870         |                |                  | 3  |
| 10 | 70.0651         | 987.4378        | 494.2225        | 970.4112 | 485.7093         | 969.4272        | 485.2172         | P    | 272.1717         | 136.5895        | 255.1452  | 128.0762         |                |                  | 2  |
| 11 | <b>129.1135</b> |                 |                 |          |                  |                 |                  | R    | 175.1190         | 88.0631         | 158.0924  | 79.5498          |                |                  | 1  |

MS/MS Fragmentation of **TGQAPGYSYTAANK**

Found in **P99999**, P99999|CYC\_HUMAN Cytochrome c OS=Homo sapiens GN=CYCS PE=1 SV=2

Match to Query 212: 1427.491608 from(714.753080,2+)

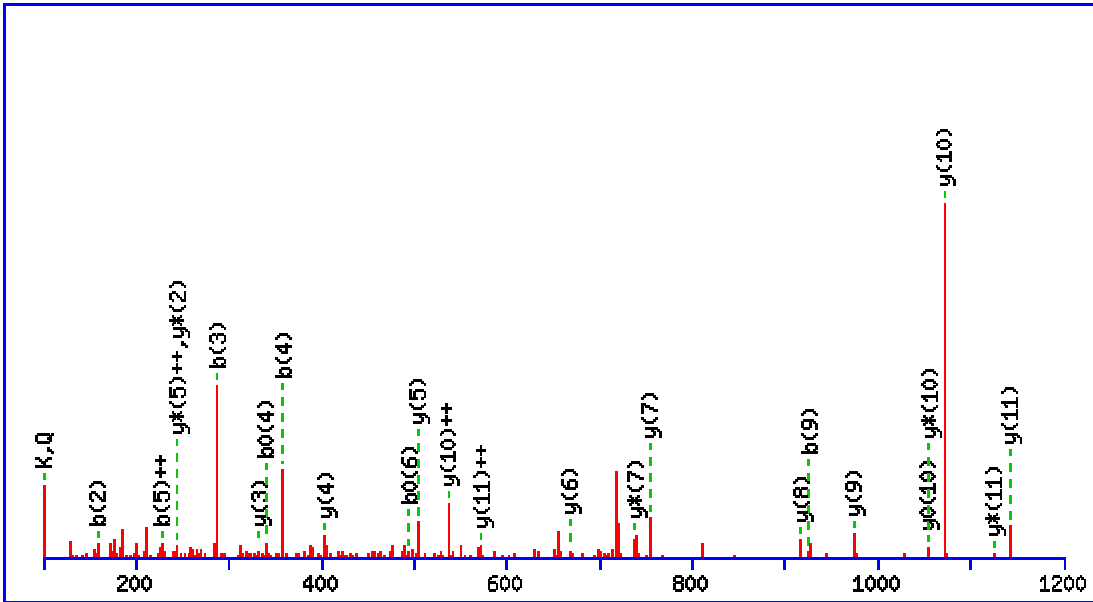

Monoisotopic mass of neutral peptide Mr(calc): 1427.6681

Fixed modifications: Carbamidomethyl (C)

Ions Score: 37 Expect: 0.015

Matches (Bold Red): 26/158 fragment ions using 70 most intense peaks

| #  | Immon.          | b               | b <sup>++</sup> | b*        | b <sup>***</sup> | b <sup>0</sup>  | b <sup>++</sup> | Seq. | y                | y <sup>++</sup> | y*               | y <sup>***</sup> | y <sup>0</sup>   | y <sup>0++</sup> | #  |
|----|-----------------|-----------------|-----------------|-----------|------------------|-----------------|-----------------|------|------------------|-----------------|------------------|------------------|------------------|------------------|----|
| 1  | 74.0600         | 102.0550        | 51.5311         |           |                  | 84.0444         | 42.5258         | T    |                  |                 |                  |                  |                  |                  | 14 |
| 2  | 30.0338         | <b>159.0764</b> | 80.0418         |           |                  | 141.0659        | 71.0366         | G    | 1327.6277        | 664.3175        | 1310.6012        | 655.8042         | 1309.6171        | 655.3122         | 13 |
| 3  | <b>101.0709</b> | <b>287.1350</b> | 144.0711        | 270.1084  | 135.5579         | 269.1244        | 135.0659        | Q    | 1270.6062        | 635.8068        | 1253.5797        | 627.2935         | 1252.5957        | 626.8015         | 12 |
| 4  | 44.0495         | <b>358.1721</b> | 179.5897        | 341.1456  | 171.0764         | <b>340.1615</b> | 170.5844        | A    | <b>1142.5477</b> | <b>571.7775</b> | <b>1125.5211</b> | 563.2642         | 1124.5371        | 562.7722         | 11 |
| 5  | 70.0651         | 455.2249        | <b>228.1161</b> | 438.1983  | 219.6028         | 437.2143        | 219.1108        | P    | <b>1071.5106</b> | <b>536.2589</b> | <b>1054.4840</b> | 527.7456         | <b>1053.5000</b> | 527.2536         | 10 |
| 6  | 30.0338         | 512.2463        | 256.6268        | 495.2198  | 248.1135         | <b>494.2358</b> | 247.6215        | G    | <b>974.4578</b>  | 487.7325        | 957.4312         | 479.2193         | 956.4472         | 478.7272         | 9  |
| 7  | 136.0757        | 675.3097        | 338.1585        | 658.2831  | 329.6452         | 657.2991        | 329.1532        | Y    | <b>917.4363</b>  | 459.2218        | 900.4098         | 450.7085         | 899.4258         | 450.2165         | 8  |
| 8  | 60.0444         | 762.3417        | 381.6745        | 745.3151  | 373.1612         | 744.3311        | 372.6692        | S    | <b>754.3730</b>  | 377.6901        | <b>737.3464</b>  | 369.1769         | 736.3624         | 368.6849         | 7  |
| 9  | 136.0757        | <b>925.4050</b> | 463.2062        | 908.3785  | 454.6929         | 907.3945        | 454.2009        | Y    | <b>667.3410</b>  | 334.1741        | 650.3144         | 325.6608         | 649.3304         | 325.1688         | 6  |
| 10 | 74.0600         | 1026.4527       | 513.7300        | 1009.4262 | 505.2167         | 1008.4421       | 504.7247        | T    | <b>504.2776</b>  | 252.6425        | 487.2511         | <b>244.1292</b>  | 486.2671         | 243.6372         | 5  |
| 11 | 44.0495         | 1097.4898       | 549.2485        | 1080.4633 | 540.7353         | 1079.4793       | 540.2433        | A    | <b>403.2300</b>  | 202.1186        | 386.2034         | 193.6053         |                  |                  | 4  |
| 12 | 44.0495         | 1168.5269       | 584.7671        | 1151.5004 | 576.2538         | 1150.5164       | 575.7618        | A    | <b>332.1928</b>  | 166.6001        | 315.1663         | 158.0868         |                  |                  | 3  |
| 13 | 87.0553         | 1282.5699       | 641.7886        | 1265.5433 | 633.2753         | 1264.5593       | 632.7833        | N    | 261.1557         | 131.0815        | <b>244.1292</b>  | 122.5682         |                  |                  | 2  |
| 14 | <b>101.1073</b> |                 |                 |           |                  |                 |                 | K    | 147.1128         | 74.0600         | 130.0863         | 65.5468          |                  |                  | 1  |

MS/MS Fragmentation of **YATLATVSR**

Found in **Q14204**, Q14204|DYHC1\_HUMAN Cytoplasmic dynein 1 heavy chain 1 OS=Homo sapiens  
 GN=DYNC1H1 PE=1 SV=5

Match to Query 314: 980.492660 from(491.253606,2+)

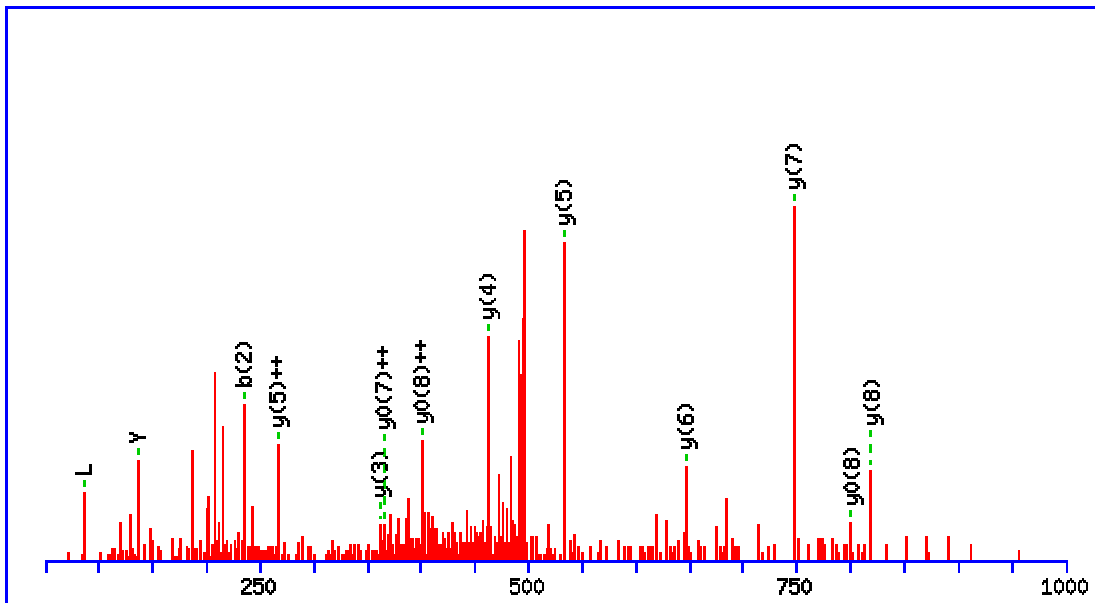

**Monoisotopic mass of neutral peptide Mr(calc):** 980.5291

**Fixed modifications:** Carbamidomethyl (C)

**Ions Score:** 42 **Expect:** 0.0041

**Matches (Bold Red):** 13/83 fragment ions using 27 most intense peaks

| # | Immon.          | b               | b <sup>++</sup> | b <sup>0</sup> | b <sup>0++</sup> | Seq.     | y               | y <sup>++</sup> | y <sup>*</sup> | y <sup>*++</sup> | y <sup>0</sup>  | y <sup>0++</sup> | # |
|---|-----------------|-----------------|-----------------|----------------|------------------|----------|-----------------|-----------------|----------------|------------------|-----------------|------------------|---|
| 1 | <b>136.0757</b> | 164.0706        | 82.5389         |                |                  | <b>Y</b> |                 |                 |                |                  |                 |                  | 9 |
| 2 | 44.0495         | <b>235.1077</b> | 118.0575        |                |                  | <b>A</b> | <b>818.4730</b> | 409.7402        | 801.4465       | 401.2269         | <b>800.4625</b> | <b>400.7349</b>  | 8 |
| 3 | 74.0600         | 336.1554        | 168.5813        | 318.1448       | 159.5761         | <b>T</b> | <b>747.4359</b> | 374.2216        | 730.4094       | 365.7083         | 729.4254        | <b>365.2163</b>  | 7 |
| 4 | <b>86.0964</b>  | 449.2395        | 225.1234        | 431.2289       | 216.1181         | <b>L</b> | <b>646.3883</b> | 323.6978        | 629.3617       | 315.1845         | 628.3777        | 314.6925         | 6 |
| 5 | 44.0495         | 520.2766        | 260.6419        | 502.2660       | 251.6366         | <b>A</b> | <b>533.3042</b> | <b>267.1557</b> | 516.2776       | 258.6425         | 515.2936        | 258.1504         | 5 |
| 6 | 74.0600         | 621.3243        | 311.1658        | 603.3137       | 302.1605         | <b>T</b> | <b>462.2671</b> | 231.6372        | 445.2405       | 223.1239         | 444.2565        | 222.6319         | 4 |
| 7 | 72.0808         | 720.3927        | 360.7000        | 702.3821       | 351.6947         | <b>V</b> | <b>361.2194</b> | 181.1133        | 344.1928       | 172.6001         | 343.2088        | 172.1081         | 3 |
| 8 | 60.0444         | 807.4247        | 404.2160        | 789.4141       | 395.2107         | <b>S</b> | 262.1510        | 131.5791        | 245.1244       | 123.0659         | 244.1404        | 122.5738         | 2 |
| 9 | 129.1135        |                 |                 |                |                  | <b>R</b> | 175.1190        | 88.0631         | 158.0924       | 79.5498          |                 |                  | 1 |

MS/MS Fragmentation of **ELQSQIQEAR**

Found in **Q9P2X0**, Q9P2X0|DPM3\_HUMAN Dolichol-phosphate mannosyltransferase subunit 3 OS=Homo sapiens GN=DPM3 PE=1 SV=2

Match to Query 454: 1200.640268 from(601.327410,2+)

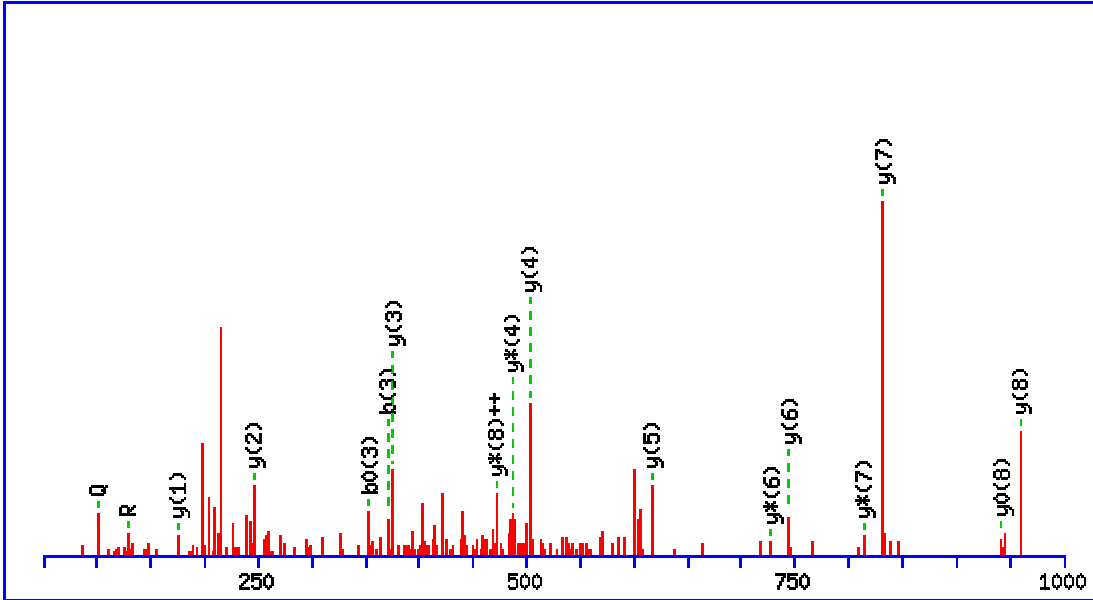

Monoisotopic mass of neutral peptide Mr(calc): 1200.6098

Fixed modifications: Carbamidomethyl (C)

Ions Score: 55 Expect: 0.00024

Matches (Bold Red): 19/110 fragment ions using 27 most intense peaks

| #  | Immon.          | b               | b <sup>++</sup> | b*        | b <sup>*++</sup> | b <sup>0</sup>  | b <sup>0++</sup> | Seq. | y               | y <sup>++</sup> | y*              | y <sup>*++</sup> | y <sup>0</sup>  | y <sup>0++</sup> | #  |
|----|-----------------|-----------------|-----------------|-----------|------------------|-----------------|------------------|------|-----------------|-----------------|-----------------|------------------|-----------------|------------------|----|
| 1  | 102.0550        | 130.0499        | 65.5286         |           |                  | 112.0393        | 56.5233          | E    |                 |                 |                 |                  |                 |                  | 10 |
| 2  | 86.0964         | 243.1339        | 122.0706        |           |                  | 225.1234        | 113.0653         | L    | 1072.5745       | 536.7909        | 1055.5480       | 528.2776         | 1054.5640       | 527.7856         | 9  |
| 3  | <b>101.0709</b> | <b>371.1925</b> | 186.0999        | 354.1660  | 177.5866         | <b>353.1819</b> | 177.0946         | Q    | <b>959.4905</b> | 480.2489        | 942.4639        | <b>471.7356</b>  | <b>941.4799</b> | 471.2436         | 8  |
| 4  | 60.0444         | 458.2245        | 229.6159        | 441.1980  | 221.1026         | 440.2140        | 220.6106         | S    | <b>831.4319</b> | 416.2196        | <b>814.4054</b> | 407.7063         | 813.4213        | 407.2143         | 7  |
| 5  | <b>101.0709</b> | 586.2831        | 293.6452        | 569.2566  | 285.1319         | 568.2726        | 284.6399         | Q    | <b>744.3999</b> | 372.7036        | <b>727.3733</b> | 364.1903         | 726.3893        | 363.6983         | 6  |
| 6  | 86.0964         | 699.3672        | 350.1872        | 682.3406  | 341.6740         | 681.3566        | 341.1819         | I    | <b>616.3413</b> | 308.6743        | 599.3148        | 300.1610         | 598.3307        | 299.6690         | 5  |
| 7  | <b>101.0709</b> | 827.4258        | 414.2165        | 810.3992  | 405.7032         | 809.4152        | 405.2112         | Q    | <b>503.2572</b> | 252.1323        | <b>486.2307</b> | 243.6190         | 485.2467        | 243.1270         | 4  |
| 8  | 102.0550        | 956.4684        | 478.7378        | 939.4418  | 470.2245         | 938.4578        | 469.7325         | E    | <b>375.1987</b> | 188.1030        | 358.1721        | 179.5897         | 357.1881        | 179.0977         | 3  |
| 9  | 44.0495         | 1027.5055       | 514.2564        | 1010.4789 | 505.7431         | 1009.4949       | 505.2511         | A    | <b>246.1561</b> | 123.5817        | 229.1295        | 115.0684         |                 |                  | 2  |
| 10 | <b>129.1135</b> |                 |                 |           |                  |                 |                  | R    | <b>175.1190</b> | 88.0631         | 158.0924        | 79.5498          |                 |                  | 1  |

MS/MS Fragmentation of **GTSFDAAATSGGSASSEK**

Found in **P13804**, P13804|ETFA\_HUMAN Electron transfer flavoprotein subunit alpha, mitochondrial  
 OS=Homo sapiens GN=ETFA PE=1 SV=1

Match to Query 602: 1629.719884 from(815.867218,2+)

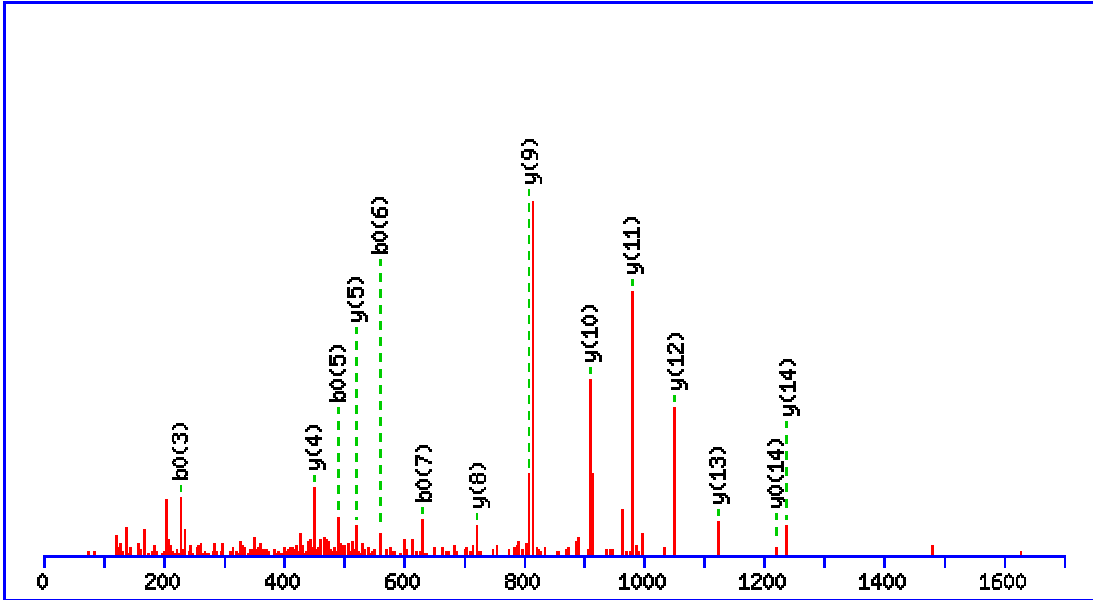

Monoisotopic mass of neutral peptide  $M_r(\text{calc})$ : 1629.7118

Fixed modifications: Carbamidomethyl (C)

Ions Score: 46 Expect: 0.0016

Matches (**Bold Red**): 14/184 fragment ions using 29 most intense peaks

| #  | Immon.   | b         | b <sup>++</sup> | b <sup>0</sup>  | b <sup>0++</sup> | Seq. | y                | y <sup>++</sup> | y <sup>*</sup> | y <sup>*++</sup> | y <sup>0</sup>   | y <sup>0++</sup> | #  |
|----|----------|-----------|-----------------|-----------------|------------------|------|------------------|-----------------|----------------|------------------|------------------|------------------|----|
| 1  | 30.0338  | 58.0287   | 29.5180         |                 |                  | G    |                  |                 |                |                  |                  |                  | 18 |
| 2  | 74.0600  | 159.0764  | 80.0418         | 141.0659        | 71.0366          | T    | 1573.6976        | 787.3525        | 1556.6711      | 778.8392         | 1555.6871        | 778.3472         | 17 |
| 3  | 60.0444  | 246.1084  | 123.5579        | <b>228.0979</b> | 114.5526         | S    | 1472.6500        | 736.8286        | 1455.6234      | 728.3153         | 1454.6394        | 727.8233         | 16 |
| 4  | 120.0808 | 393.1769  | 197.0921        | 375.1663        | 188.0868         | F    | 1385.6179        | 693.3126        | 1368.5914      | 684.7993         | 1367.6074        | 684.3073         | 15 |
| 5  | 88.0393  | 508.2038  | 254.6055        | <b>490.1932</b> | 245.6003         | D    | <b>1238.5495</b> | 619.7784        | 1221.5230      | 611.2651         | <b>1220.5390</b> | 610.7731         | 14 |
| 6  | 44.0495  | 579.2409  | 290.1241        | <b>561.2304</b> | 281.1188         | A    | <b>1123.5226</b> | 562.2649        | 1106.4960      | 553.7516         | 1105.5120        | 553.2596         | 13 |
| 7  | 44.0495  | 650.2780  | 325.6427        | <b>632.2675</b> | 316.6374         | A    | <b>1052.4855</b> | 526.7464        | 1035.4589      | 518.2331         | 1034.4749        | 517.7411         | 12 |
| 8  | 44.0495  | 721.3151  | 361.1612        | 703.3046        | 352.1559         | A    | <b>981.4483</b>  | 491.2278        | 964.4218       | 482.7145         | 963.4378         | 482.2225         | 11 |
| 9  | 74.0600  | 822.3628  | 411.6851        | 804.3523        | 402.6798         | T    | <b>910.4112</b>  | 455.7093        | 893.3847       | 447.1960         | 892.4007         | 446.7040         | 10 |
| 10 | 60.0444  | 909.3949  | 455.2011        | 891.3843        | 446.1958         | S    | <b>809.3636</b>  | 405.1854        | 792.3370       | 396.6721         | 791.3530         | 396.1801         | 9  |
| 11 | 30.0338  | 966.4163  | 483.7118        | 948.4058        | 474.7065         | G    | <b>722.3315</b>  | 361.6694        | 705.3050       | 353.1561         | 704.3210         | 352.6641         | 8  |
| 12 | 30.0338  | 1023.4378 | 512.2225        | 1005.4272       | 503.2172         | G    | 665.3101         | 333.1587        | 648.2835       | 324.6454         | 647.2995         | 324.1534         | 7  |
| 13 | 60.0444  | 1110.4698 | 555.7385        | 1092.4592       | 546.7333         | S    | 608.2886         | 304.6479        | 591.2620       | 296.1347         | 590.2780         | 295.6427         | 6  |
| 14 | 44.0495  | 1181.5069 | 591.2571        | 1163.4964       | 582.2518         | A    | <b>521.2566</b>  | 261.1319        | 504.2300       | 252.6186         | 503.2460         | 252.1266         | 5  |
| 15 | 60.0444  | 1268.5390 | 634.7731        | 1250.5284       | 625.7678         | S    | <b>450.2195</b>  | 225.6134        | 433.1929       | 217.1001         | 432.2089         | 216.6081         | 4  |
| 16 | 60.0444  | 1355.5710 | 678.2891        | 1337.5604       | 669.2838         | S    | 363.1874         | 182.0974        | 346.1609       | 173.5841         | 345.1769         | 173.0921         | 3  |
| 17 | 102.0550 | 1484.6136 | 742.8104        | 1466.6030       | 733.8051         | E    | 276.1554         | 138.5813        | 259.1288       | 130.0681         | 258.1448         | 129.5761         | 2  |
| 18 | 101.1073 |           |                 |                 |                  | K    | 147.1128         | 74.0600         | 130.0863       | 65.5468          |                  |                  | 1  |

MS/MS Fragmentation of **TTLTAAITK**

Found in **P49411**, P49411|EFTU\_HUMAN Elongation factor Tu, mitochondrial OS=Homo sapiens GN=TUFM PE=1 SV=2

Match to Query 139: 918.603748 from(460.309150,2+)

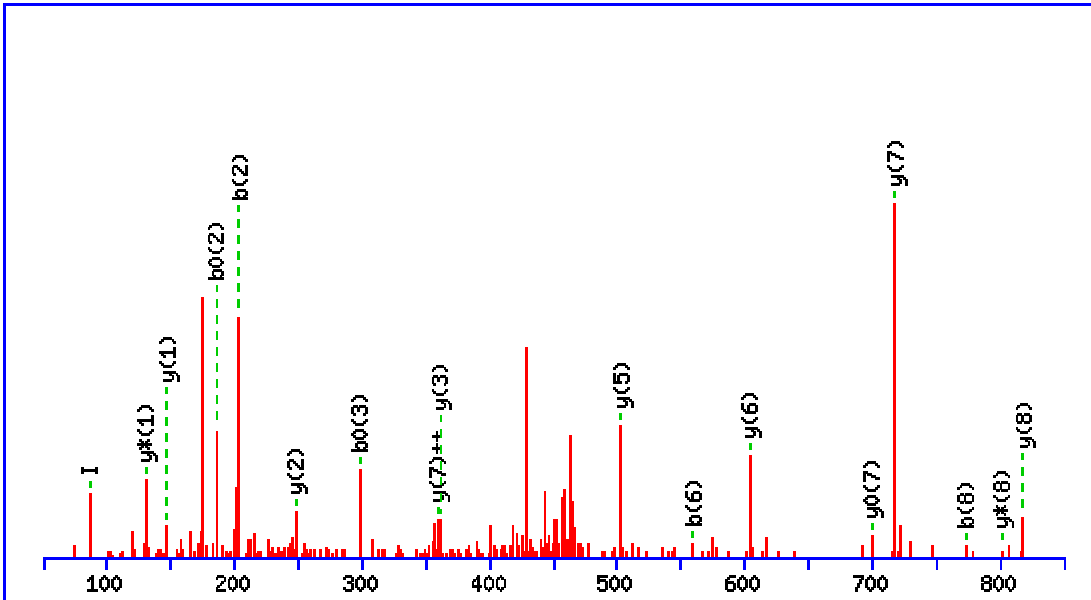

Monoisotopic mass of neutral peptide Mr(calc): 918.5386

Fixed modifications: Carbamidomethyl (C)

Ions Score: 38 Expect: 0.012

Matches (Bold Red): 18/87 fragment ions using 49 most intense peaks

| # | Immon.         | b               | b <sup>++</sup> | b <sup>0</sup>  | b <sup>0++</sup> | Seq. | y               | y <sup>++</sup> | y <sup>*</sup>  | y <sup>*++</sup> | y <sup>0</sup>  | y <sup>0++</sup> | # |
|---|----------------|-----------------|-----------------|-----------------|------------------|------|-----------------|-----------------|-----------------|------------------|-----------------|------------------|---|
| 1 | 74.0600        | 102.0550        | 51.5311         | 84.0444         | 42.5258          | T    |                 |                 |                 |                  |                 |                  | 9 |
| 2 | 74.0600        | <b>203.1026</b> | 102.0550        | <b>185.0921</b> | 93.0497          | T    | <b>818.4982</b> | 409.7527        | <b>801.4716</b> | 401.2395         | 800.4876        | 400.7475         | 8 |
| 3 | <b>86.0964</b> | 316.1867        | 158.5970        | <b>298.1761</b> | 149.5917         | L    | <b>717.4505</b> | <b>359.2289</b> | 700.4240        | 350.7156         | <b>699.4400</b> | 350.2236         | 7 |
| 4 | 74.0600        | 417.2344        | 209.1208        | 399.2238        | 200.1155         | T    | <b>604.3665</b> | 302.6869        | 587.3399        | 294.1736         | 586.3559        | 293.6816         | 6 |
| 5 | 44.0495        | 488.2715        | 244.6394        | 470.2609        | 235.6341         | A    | <b>503.3188</b> | 252.1630        | 486.2922        | 243.6498         | 485.3082        | 243.1577         | 5 |
| 6 | 44.0495        | <b>559.3086</b> | 280.1579        | 541.2980        | 271.1527         | A    | 432.2817        | 216.6445        | 415.2551        | 208.1312         | 414.2711        | 207.6392         | 4 |
| 7 | <b>86.0964</b> | 672.3927        | 336.7000        | 654.3821        | 327.6947         | I    | <b>361.2445</b> | 181.1259        | 344.2180        | 172.6126         | 343.2340        | 172.1206         | 3 |
| 8 | 74.0600        | <b>773.4403</b> | 387.2238        | 755.4298        | 378.2185         | T    | <b>248.1605</b> | 124.5839        | 231.1339        | 116.0706         | 230.1499        | 115.5786         | 2 |
| 9 | 101.1073       |                 |                 |                 |                  | K    | <b>147.1128</b> | 74.0600         | <b>130.0863</b> | 65.5468          |                 |                  | 1 |



MS/MS Fragmentation of **QGQDNLSSVK**

Found in **P30040**, P30040|ERP29\_HUMAN Endoplasmic reticulum protein ERp29 OS=Homo sapiens  
 GN=ERP29 PE=1 SV=4

Match to Query 357: 1074.570634 from(538.292593,2+)

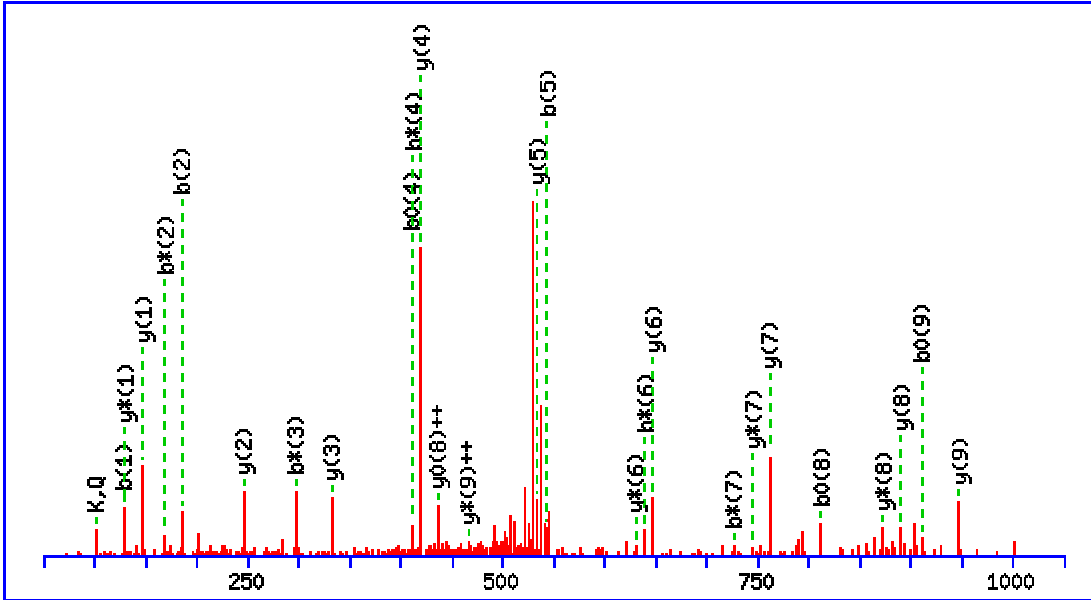

Monoisotopic mass of neutral peptide Mr(calc): 1074.5305

Fixed modifications: Carbamidomethyl (C)

Ions Score: 69 Expect: 9.3e-006

Matches (Bold Red): 29/108 fragment ions using 62 most intense peaks

| #  | Immon.          | b               | b <sup>++</sup> | b*              | b <sup>+++</sup> | b <sup>0</sup>  | b <sup>++</sup> | Seq.     | y               | y <sup>++</sup> | y*              | y <sup>+++</sup> | y <sup>0</sup> | y <sup>0++</sup> | #         |
|----|-----------------|-----------------|-----------------|-----------------|------------------|-----------------|-----------------|----------|-----------------|-----------------|-----------------|------------------|----------------|------------------|-----------|
| 1  | <b>101.0709</b> | <b>129.0659</b> | 65.0366         | 112.0393        | 56.5233          |                 |                 | <b>Q</b> |                 |                 |                 |                  |                |                  | <b>10</b> |
| 2  | 30.0338         | <b>186.0873</b> | 93.5473         | <b>169.0608</b> | 85.0340          |                 |                 | <b>G</b> | <b>947.4793</b> | 474.2433        | 930.4527        | <b>465.7300</b>  | 929.4687       | 465.2380         | <b>9</b>  |
| 3  | <b>101.0709</b> | 314.1459        | 157.5766        | <b>297.1193</b> | 149.0633         |                 |                 | <b>Q</b> | <b>890.4578</b> | 445.7325        | <b>873.4312</b> | 437.2193         | 872.4472       | <b>436.7272</b>  | <b>8</b>  |
| 4  | 88.0393         | 429.1728        | 215.0901        | <b>412.1463</b> | 206.5768         | <b>411.1623</b> | 206.0848        | <b>D</b> | <b>762.3992</b> | 381.7032        | <b>745.3727</b> | 373.1900         | 744.3886       | 372.6980         | <b>7</b>  |
| 5  | 87.0553         | <b>543.2158</b> | 272.1115        | 526.1892        | 263.5982         | 525.2052        | 263.1062        | <b>N</b> | <b>647.3723</b> | 324.1898        | <b>630.3457</b> | 315.6765         | 629.3617       | 315.1845         | <b>6</b>  |
| 6  | 86.0964         | 656.2998        | 328.6536        | <b>639.2733</b> | 320.1403         | 638.2893        | 319.6483        | <b>L</b> | <b>533.3293</b> | 267.1683        | 516.3028        | 258.6550         | 515.3188       | 258.1630         | <b>5</b>  |
| 7  | 60.0444         | 743.3319        | 372.1696        | <b>726.3053</b> | 363.6563         | 725.3213        | 363.1643        | <b>S</b> | <b>420.2453</b> | 210.6263        | 403.2187        | 202.1130         | 402.2347       | 201.6210         | <b>4</b>  |
| 8  | 60.0444         | 830.3639        | 415.6856        | 813.3373        | 407.1723         | <b>812.3533</b> | 406.6803        | <b>S</b> | <b>333.2132</b> | 167.1103        | 316.1867        | 158.5970         | 315.2027       | 158.1050         | <b>3</b>  |
| 9  | 72.0808         | 929.4323        | 465.2198        | 912.4058        | 456.7065         | <b>911.4217</b> | 456.2145        | <b>V</b> | <b>246.1812</b> | 123.5942        | 229.1547        | 115.0810         |                |                  | <b>2</b>  |
| 10 | <b>101.1073</b> |                 |                 |                 |                  |                 |                 | <b>K</b> | <b>147.1128</b> | 74.0600         | <b>130.0863</b> | 65.5468          |                |                  | <b>1</b>  |

MS/MS Fragmentation of **LVLVGDGGT**GK

Found in **P62826**, P62826|**RAN\_HUMAN** GTP-binding nuclear protein Ran OS=Homo sapiens GN=RAN PE=1 SV=3

Match to Query 198: 1014.516356 from(508.265454,2+)

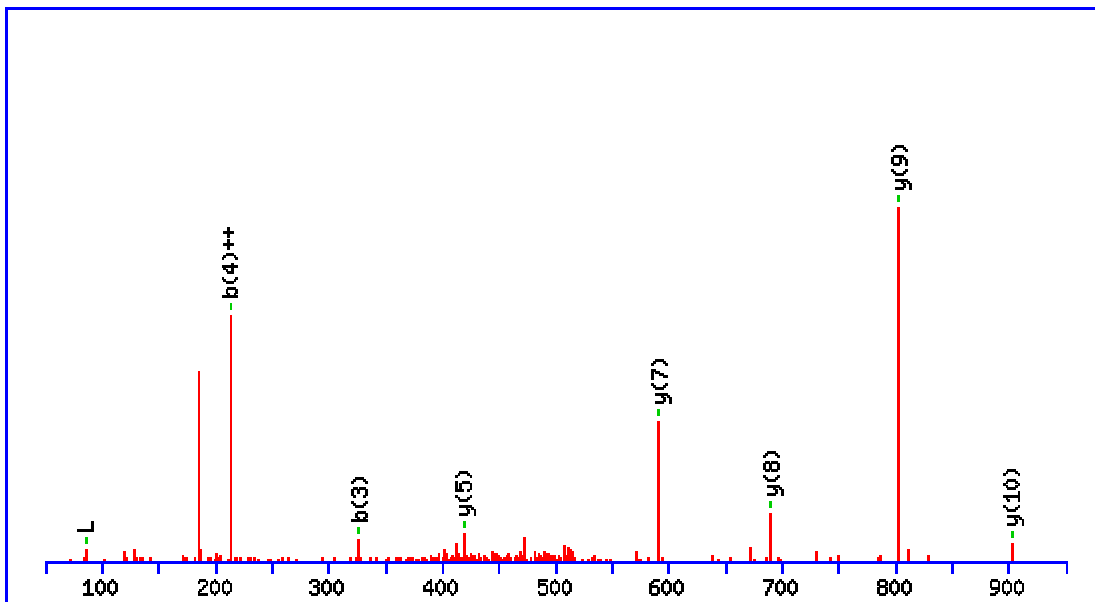

**Monoisotopic mass of neutral peptide Mr(calc):** 1014.5710

**Fixed modifications:** Carbamidomethyl (C)

**Ions Score:** 45 **Expect:** 0.0028

**Matches (Bold Red):** 10/97 fragment ions using 10 most intense peaks

| #  | Immon.         | b               | b <sup>++</sup> | b <sup>0</sup> | b <sup>0++</sup> | Seq. | y               | y <sup>++</sup> | y <sup>*</sup> | y <sup>*++</sup> | y <sup>0</sup> | y <sup>0++</sup> | #  |
|----|----------------|-----------------|-----------------|----------------|------------------|------|-----------------|-----------------|----------------|------------------|----------------|------------------|----|
| 1  | <b>86.0964</b> | 114.0913        | 57.5493         |                |                  | L    |                 |                 |                |                  |                |                  | 11 |
| 2  | 72.0808        | <b>213.1598</b> | 107.0835        |                |                  | V    | <b>902.4942</b> | 451.7507        | 885.4676       | 443.2375         | 884.4836       | 442.7454         | 10 |
| 3  | <b>86.0964</b> | <b>326.2438</b> | 163.6255        |                |                  | L    | <b>803.4258</b> | 402.2165        | 786.3992       | 393.7032         | 785.4152       | 393.2112         | 9  |
| 4  | 72.0808        | 425.3122        | <b>213.1598</b> |                |                  | V    | <b>690.3417</b> | 345.6745        | 673.3151       | 337.1612         | 672.3311       | 336.6692         | 8  |
| 5  | 30.0338        | 482.3337        | 241.6705        |                |                  | G    | <b>591.2733</b> | 296.1403        | 574.2467       | 287.6270         | 573.2627       | 287.1350         | 7  |
| 6  | 88.0393        | 597.3606        | 299.1840        | 579.3501       | 290.1787         | D    | 534.2518        | 267.6295        | 517.2253       | 259.1163         | 516.2413       | 258.6243         | 6  |
| 7  | 30.0338        | 654.3821        | 327.6947        | 636.3715       | 318.6894         | G    | <b>419.2249</b> | 210.1161        | 402.1983       | 201.6028         | 401.2143       | 201.1108         | 5  |
| 8  | 30.0338        | 711.4036        | 356.2054        | 693.3930       | 347.2001         | G    | 362.2034        | 181.6053        | 345.1769       | 173.0921         | 344.1928       | 172.6001         | 4  |
| 9  | 74.0600        | 812.4512        | 406.7293        | 794.4407       | 397.7240         | T    | 305.1819        | 153.0946        | 288.1554       | 144.5813         | 287.1714       | 144.0893         | 3  |
| 10 | 30.0338        | 869.4727        | 435.2400        | 851.4621       | 426.2347         | G    | 204.1343        | 102.5708        | 187.1077       | 94.0575          |                |                  | 2  |
| 11 | 101.1073       |                 |                 |                |                  | K    | 147.1128        | 74.0600         | 130.0863       | 65.5468          |                |                  | 1  |

MS/MS Fragmentation of **TASDFITK**

Found in **P06396**, P06396|GELS\_HUMAN Gelsolin OS=Homo sapiens GN=GSN PE=1 SV=1

Match to Query 108: 881.311730 from(441.663141,2+)

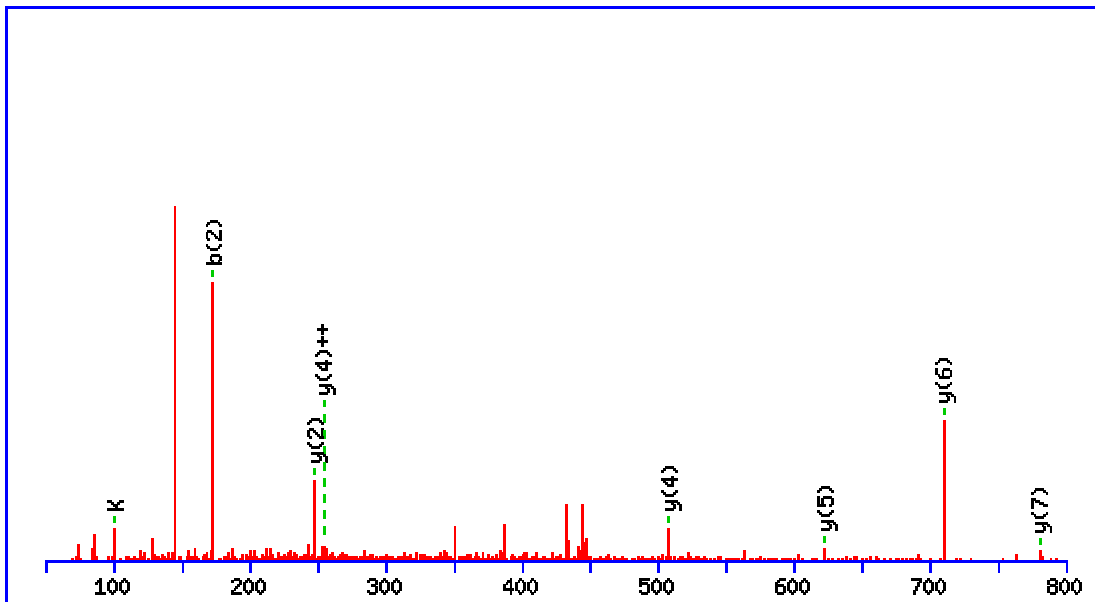

Monoisotopic mass of neutral peptide  $M_r(\text{calc})$ : 881.4494

Fixed modifications: Carbamidomethyl (C)

Ions Score: 31 Expect: 0.044

Matches (**Bold Red**): 8/76 fragment ions using 21 most intense peaks

| # | Immon.          | b               | b <sup>++</sup> | b <sup>0</sup> | b <sup>0++</sup> | Seq. | y               | y <sup>++</sup> | y <sup>*</sup> | y <sup>*++</sup> | y <sup>0</sup> | y <sup>0++</sup> | # |
|---|-----------------|-----------------|-----------------|----------------|------------------|------|-----------------|-----------------|----------------|------------------|----------------|------------------|---|
| 1 | 74.0600         | 102.0550        | 51.5311         | 84.0444        | 42.5258          | T    |                 |                 |                |                  |                |                  | 8 |
| 2 | 44.0495         | <b>173.0921</b> | 87.0497         | 155.0815       | 78.0444          | A    | <b>781.4090</b> | 391.2082        | 764.3825       | 382.6949         | 763.3985       | 382.2029         | 7 |
| 3 | 60.0444         | 260.1241        | 130.5657        | 242.1135       | 121.5604         | S    | <b>710.3719</b> | 355.6896        | 693.3454       | 347.1763         | 692.3614       | 346.6843         | 6 |
| 4 | 88.0393         | 375.1510        | 188.0792        | 357.1405       | 179.0739         | D    | <b>623.3399</b> | 312.1736        | 606.3134       | 303.6603         | 605.3293       | 303.1683         | 5 |
| 5 | 120.0808        | 522.2195        | 261.6134        | 504.2089       | 252.6081         | F    | <b>508.3130</b> | <b>254.6601</b> | 491.2864       | 246.1468         | 490.3024       | 245.6548         | 4 |
| 6 | 86.0964         | 635.3035        | 318.1554        | 617.2930       | 309.1501         | I    | 361.2445        | 181.1259        | 344.2180       | 172.6126         | 343.2340       | 172.1206         | 3 |
| 7 | 74.0600         | 736.3512        | 368.6792        | 718.3406       | 359.6740         | T    | <b>248.1605</b> | 124.5839        | 231.1339       | 116.0706         | 230.1499       | 115.5786         | 2 |
| 8 | <b>101.1073</b> |                 |                 |                |                  | K    | 147.1128        | 74.0600         | 130.0863       | 65.5468          |                |                  | 1 |

MS/MS Fragmentation of **TGAQELLR**

Found in **P06396**, P06396|GELS\_HUMAN Gelsolin OS=Homo sapiens GN=GSN PE=1 SV=1

Match to Query 189: 886.494460 from(444.254506,2+)

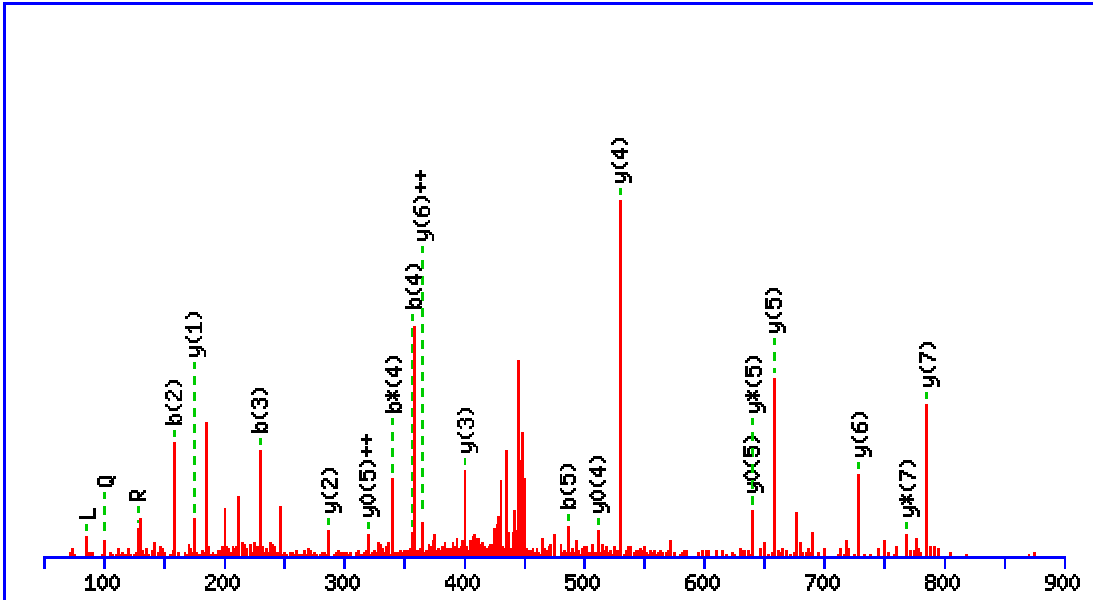

Monoisotopic mass of neutral peptide  $M_r(\text{calc})$ : 886.4872

Fixed modifications: Carbamidomethyl (C)

Ions Score: 39 Expect: 0.012

Matches (**Bold Red**): 22/80 fragment ions using 51 most intense peaks

| # | Immon.          | b               | b <sup>++</sup> | b <sup>*</sup>  | b <sup>**</sup> | b <sup>0</sup> | b <sup>0++</sup> | Seq. | y               | y <sup>++</sup> | y <sup>*</sup>  | y <sup>**</sup> | y <sup>0</sup>  | y <sup>0++</sup> | # |
|---|-----------------|-----------------|-----------------|-----------------|-----------------|----------------|------------------|------|-----------------|-----------------|-----------------|-----------------|-----------------|------------------|---|
| 1 | 74.0600         | 102.0550        | 51.5311         |                 |                 | 84.0444        | 42.5258          | T    |                 |                 |                 |                 |                 |                  | 8 |
| 2 | 30.0338         | <b>159.0764</b> | 80.0418         |                 |                 | 141.0659       | 71.0366          | G    | <b>786.4468</b> | 393.7271        | <b>769.4203</b> | 385.2138        | 768.4363        | 384.7218         | 7 |
| 3 | 44.0495         | <b>230.1135</b> | 115.5604        |                 |                 | 212.1030       | 106.5551         | A    | <b>729.4254</b> | <b>365.2163</b> | 712.3988        | 356.7030        | 711.4148        | 356.2110         | 6 |
| 4 | <b>101.0709</b> | <b>358.1721</b> | 179.5897        | <b>341.1456</b> | 171.0764        | 340.1615       | 170.5844         | Q    | <b>658.3883</b> | 329.6978        | <b>641.3617</b> | 321.1845        | <b>640.3777</b> | <b>320.6925</b>  | 5 |
| 5 | 102.0550        | <b>487.2147</b> | 244.1110        | 470.1882        | 235.5977        | 469.2041       | 235.1057         | E    | <b>530.3297</b> | 265.6685        | 513.3031        | 257.1552        | <b>512.3191</b> | 256.6632         | 4 |
| 6 | <b>86.0964</b>  | 600.2988        | 300.6530        | 583.2722        | 292.1397        | 582.2882       | 291.6477         | L    | <b>401.2871</b> | 201.1472        | 384.2605        | 192.6339        |                 |                  | 3 |
| 7 | <b>86.0964</b>  | 713.3828        | 357.1951        | 696.3563        | 348.6818        | 695.3723       | 348.1898         | L    | <b>288.2030</b> | 144.6051        | 271.1765        | 136.0919        |                 |                  | 2 |
| 8 | <b>129.1135</b> |                 |                 |                 |                 |                |                  | R    | <b>175.1190</b> | 88.0631         | 158.0924        | 79.5498         |                 |                  | 1 |

MS/MS Fragmentation of **TASTNNIAQAR**

Found in **Q9UBI6**, Q9UBI6|GBG12\_HUMAN Guanine nucleotide-binding protein G(I)/G(S)/G(O) subunit gamma-12 OS=Homo sapiens GN=GNG12 PE=1 SV=3

Match to Query 434: 1145.631020 from(573.822786,2+)

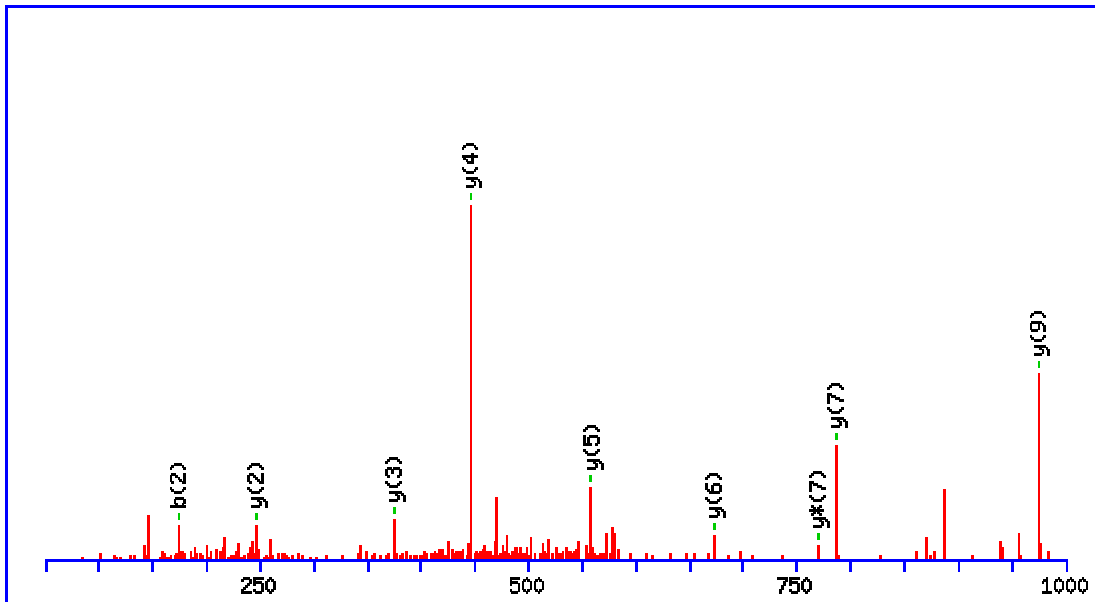

**Monoisotopic mass of neutral peptide Mr(calc):** 1145.5789

**Fixed modifications:** Carbamidomethyl (C)

**Ions Score:** 69 **Expect:** 9.5e-006

**Matches (Bold Red):** 9/109 fragment ions using 13 most intense peaks

| #  | Immon.   | b               | b <sup>++</sup> | b*       | b <sup>+++</sup> | b <sup>0</sup> | b <sup>0++</sup> | Seq. | y               | y <sup>++</sup> | y*              | y <sup>+++</sup> | y <sup>0</sup> | y <sup>0++</sup> | #  |
|----|----------|-----------------|-----------------|----------|------------------|----------------|------------------|------|-----------------|-----------------|-----------------|------------------|----------------|------------------|----|
| 1  | 74.0600  | 102.0550        | 51.5311         |          |                  | 84.0444        | 42.5258          | T    |                 |                 |                 |                  |                |                  | 11 |
| 2  | 44.0495  | <b>173.0921</b> | 87.0497         |          |                  | 155.0815       | 78.0444          | A    | 1045.5385       | 523.2729        | 1028.5119       | 514.7596         | 1027.5279      | 514.2676         | 10 |
| 3  | 60.0444  | 260.1241        | 130.5657        |          |                  | 242.1135       | 121.5604         | S    | <b>974.5014</b> | 487.7543        | 957.4748        | 479.2411         | 956.4908       | 478.7490         | 9  |
| 4  | 74.0600  | 361.1718        | 181.0895        |          |                  | 343.1612       | 172.0842         | T    | 887.4694        | 444.2383        | 870.4428        | 435.7250         | 869.4588       | 435.2330         | 8  |
| 5  | 87.0553  | 475.2147        | 238.1110        | 458.1882 | 229.5977         | 457.2041       | 229.1057         | N    | <b>786.4217</b> | 393.7145        | <b>769.3951</b> | 385.2012         |                |                  | 7  |
| 6  | 87.0553  | 589.2576        | 295.1325        | 572.2311 | 286.6192         | 571.2471       | 286.1272         | N    | <b>672.3787</b> | 336.6930        | 655.3522        | 328.1797         |                |                  | 6  |
| 7  | 86.0964  | 702.3417        | 351.6745        | 685.3151 | 343.1612         | 684.3311       | 342.6692         | I    | <b>558.3358</b> | 279.6715        | 541.3093        | 271.1583         |                |                  | 5  |
| 8  | 44.0495  | 773.3788        | 387.1930        | 756.3523 | 378.6798         | 755.3682       | 378.1878         | A    | <b>445.2518</b> | 223.1295        | 428.2252        | 214.6162         |                |                  | 4  |
| 9  | 101.0709 | 901.4374        | 451.2223        | 884.4108 | 442.7091         | 883.4268       | 442.2170         | Q    | <b>374.2146</b> | 187.6110        | 357.1881        | 179.0977         |                |                  | 3  |
| 10 | 44.0495  | 972.4745        | 486.7409        | 955.4480 | 478.2276         | 954.4639       | 477.7356         | A    | <b>246.1561</b> | 123.5817        | 229.1295        | 115.0684         |                |                  | 2  |
| 11 | 129.1135 |                 |                 |          |                  |                |                  | R    | 175.1190        | 88.0631         | 158.0924        | 79.5498          |                |                  | 1  |

MS/MS Fragmentation of **FVVQNVSAQK**

Found in **Q92598**, Q92598|HS105\_HUMAN Heat shock protein 105 kDa OS=Homo sapiens GN=HSPH1  
 PE=1 SV=1

Match to Query 409: 1118.595160 from(560.304856,2+)

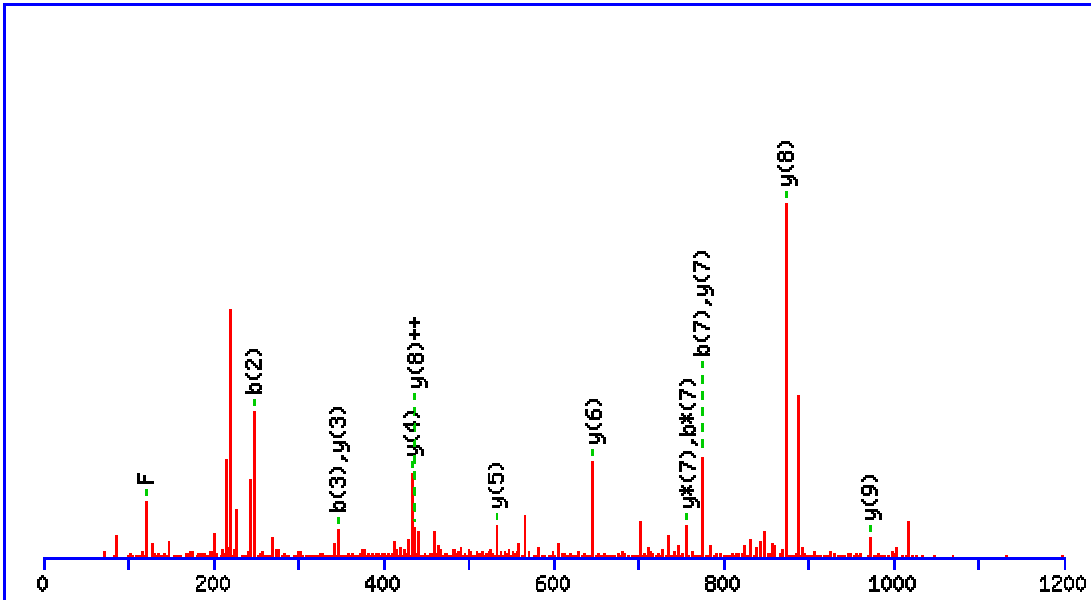

Monoisotopic mass of neutral peptide  $M_r(\text{calc})$ : 1118.6084

Fixed modifications: Carbamidomethyl (C)

Ions Score: 44 Expect: 0.003

Matches (**Bold Red**): 14/94 fragment ions using 22 most intense peaks

| #  | Immon.          | b               | b <sup>++</sup> | b <sup>*</sup>  | b <sup>+++</sup> | b <sup>0</sup> | b <sup>0++</sup> | Seq.     | y               | y <sup>++</sup> | y <sup>*</sup>  | y <sup>***</sup> | y <sup>0</sup> | y <sup>0++</sup> | #         |
|----|-----------------|-----------------|-----------------|-----------------|------------------|----------------|------------------|----------|-----------------|-----------------|-----------------|------------------|----------------|------------------|-----------|
| 1  | <b>120.0808</b> | 148.0757        | 74.5415         |                 |                  |                |                  | <b>F</b> |                 |                 |                 |                  |                |                  | <b>10</b> |
| 2  | 72.0808         | <b>247.1441</b> | 124.0757        |                 |                  |                |                  | <b>V</b> | <b>972.5473</b> | 486.7773        | 955.5207        | 478.2640         | 954.5367       | 477.7720         | <b>9</b>  |
| 3  | 72.0808         | <b>346.2125</b> | 173.6099        |                 |                  |                |                  | <b>V</b> | <b>873.4789</b> | <b>437.2431</b> | 856.4523        | 428.7298         | 855.4683       | 428.2378         | <b>8</b>  |
| 4  | 101.0709        | 474.2711        | 237.6392        | 457.2445        | 229.1259         |                |                  | <b>Q</b> | <b>774.4104</b> | 387.7089        | <b>757.3839</b> | 379.1956         | 756.3999       | 378.7036         | <b>7</b>  |
| 5  | 87.0553         | 588.3140        | 294.6606        | 571.2875        | 286.1474         |                |                  | <b>N</b> | <b>646.3519</b> | 323.6796        | 629.3253        | 315.1663         | 628.3413       | 314.6743         | <b>6</b>  |
| 6  | 72.0808         | 687.3824        | 344.1949        | 670.3559        | 335.6816         |                |                  | <b>V</b> | <b>532.3089</b> | 266.6581        | 515.2824        | 258.1448         | 514.2984       | 257.6528         | <b>5</b>  |
| 7  | 60.0444         | <b>774.4145</b> | 387.7109        | <b>757.3879</b> | 379.1976         | 756.4039       | 378.7056         | <b>S</b> | <b>433.2405</b> | 217.1239        | 416.2140        | 208.6106         | 415.2300       | 208.1186         | <b>4</b>  |
| 8  | 44.0495         | 845.4516        | 423.2294        | 828.4250        | 414.7162         | 827.4410       | 414.2241         | <b>A</b> | <b>346.2085</b> | 173.6079        | 329.1819        | 165.0946         |                |                  | <b>3</b>  |
| 9  | 101.0709        | 973.5102        | 487.2587        | 956.4836        | 478.7454         | 955.4996       | 478.2534         | <b>Q</b> | 275.1714        | 138.0893        | 258.1448        | 129.5761         |                |                  | <b>2</b>  |
| 10 | 101.1073        |                 |                 |                 |                  |                |                  | <b>K</b> | 147.1128        | 74.0600         | 130.0863        | 65.5468          |                |                  | <b>1</b>  |

MS/MS Fragmentation of **LQAEAQLR**

Found in **Q16543**, Q16543|CDC37\_HUMAN Hsp90 co-chaperone Cdc37 OS=Homo sapiens GN=CDC37 PE=1 SV=1

Match to Query 370: 1055.564670 from (528.789611,2+)

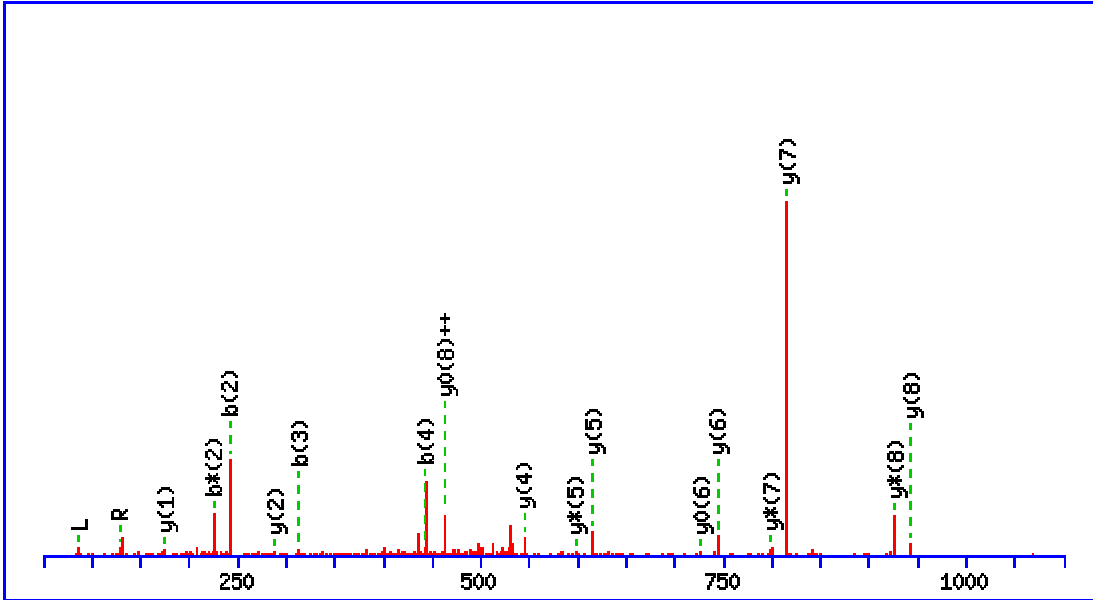

Monoisotopic mass of neutral peptide  $M_r(\text{calc})$ : 1055.5723

Fixed modifications: Carbamidomethyl (C)

Ions Score: 42 Expect: 0.0047

Matches (**Bold Red**): 19/87 fragment ions using 39 most intense peaks

| # | Immon.          | b               | b <sup>++</sup> | b*              | b <sup>+++</sup> | b <sup>0</sup> | b <sup>0++</sup> | Seq. | y               | y <sup>++</sup> | y*              | y <sup>+++</sup> | y <sup>0</sup>  | y <sup>0++</sup> | # |
|---|-----------------|-----------------|-----------------|-----------------|------------------|----------------|------------------|------|-----------------|-----------------|-----------------|------------------|-----------------|------------------|---|
| 1 | <b>86.0964</b>  | 114.0913        | 57.5493         |                 |                  |                |                  | L    |                 |                 |                 |                  |                 |                  | 9 |
| 2 | 101.0709        | <b>242.1499</b> | 121.5786        | <b>225.1234</b> | 113.0653         |                |                  | Q    | <b>943.4956</b> | 472.2514        | <b>926.4690</b> | 463.7381         | 925.4850        | <b>463.2461</b>  | 8 |
| 3 | 44.0495         | <b>313.1870</b> | 157.0972        | 296.1605        | 148.5839         |                |                  | A    | <b>815.4370</b> | 408.2221        | <b>798.4104</b> | 399.7089         | 797.4264        | 399.2169         | 7 |
| 4 | 102.0550        | <b>442.2296</b> | 221.6185        | 425.2031        | 213.1052         | 424.2191       | 212.6132         | E    | <b>744.3999</b> | 372.7036        | 727.3733        | 364.1903         | <b>726.3893</b> | 363.6983         | 6 |
| 5 | 44.0495         | 513.2667        | 257.1370        | 496.2402        | 248.6237         | 495.2562       | 248.1317         | A    | <b>615.3573</b> | 308.1823        | <b>598.3307</b> | 299.6690         |                 |                  | 5 |
| 6 | 101.0709        | 641.3253        | 321.1663        | 624.2988        | 312.6530         | 623.3148       | 312.1610         | Q    | <b>544.3202</b> | 272.6637        | 527.2936        | 264.1504         |                 |                  | 4 |
| 7 | 101.0709        | 769.3839        | 385.1956        | 752.3573        | 376.6823         | 751.3733       | 376.1903         | Q    | 416.2616        | 208.6344        | 399.2350        | 200.1212         |                 |                  | 3 |
| 8 | <b>86.0964</b>  | 882.4680        | 441.7376        | 865.4414        | 433.2243         | 864.4574       | 432.7323         | L    | <b>288.2030</b> | 144.6051        | 271.1765        | 136.0919         |                 |                  | 2 |
| 9 | <b>129.1135</b> |                 |                 |                 |                  |                |                  | R    | <b>175.1190</b> | 88.0631         | 158.0924        | 79.5498          |                 |                  | 1 |

MS/MS Fragmentation of **LAGLFNEQR**

Found in **Q9Y4L1**, Q9Y4L1|HYOU1\_HUMAN Hypoxia up-regulated protein 1 OS=Homo sapiens  
 GN=HYOU1 PE=1 SV=1

Match to Query 289: 1046.520362 from(524.267457,2+)

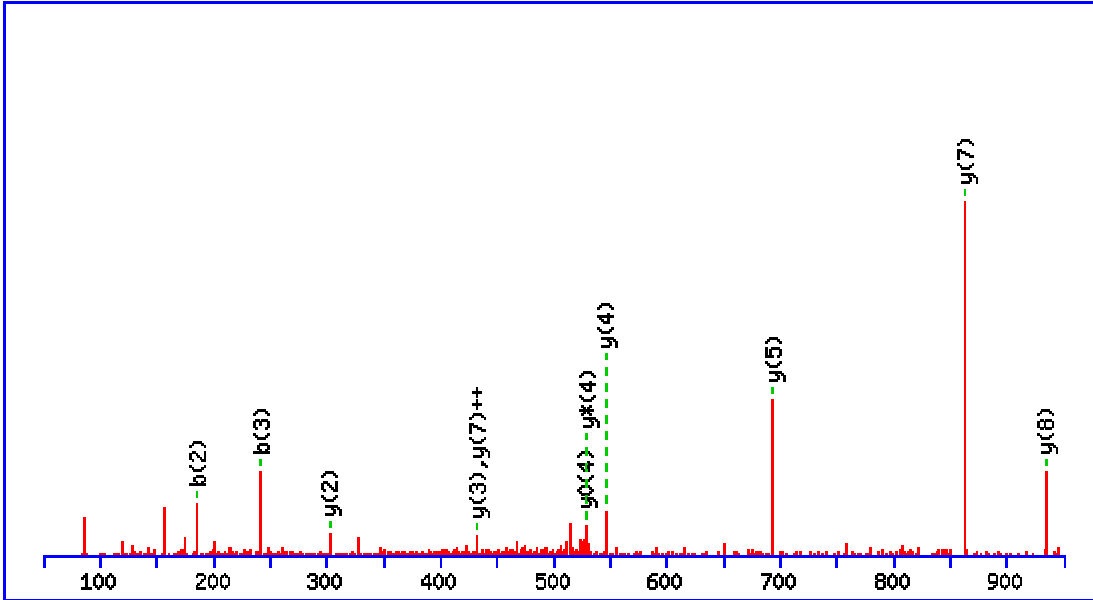

**Monoisotopic mass of neutral peptide Mr(calc):** 1046.5509

**Fixed modifications:** Carbamidomethyl (C)

**Ions Score:** 49 **Expect:** 0.00092

**Matches (Bold Red):** 11/79 fragment ions using 13 most intense peaks

| # | Immon.   | b               | b <sup>++</sup> | b <sup>*</sup> | b <sup>*++</sup> | b <sup>0</sup> | b <sup>0++</sup> | Seq. | y               | y <sup>++</sup> | y <sup>*</sup>  | y <sup>*++</sup> | y <sup>0</sup>  | y <sup>0++</sup> | # |
|---|----------|-----------------|-----------------|----------------|------------------|----------------|------------------|------|-----------------|-----------------|-----------------|------------------|-----------------|------------------|---|
| 1 | 86.0964  | 114.0913        | 57.5493         |                |                  |                |                  | L    |                 |                 |                 |                  |                 |                  | 9 |
| 2 | 44.0495  | <b>185.1285</b> | 93.0679         |                |                  |                |                  | A    | <b>934.4741</b> | 467.7407        | 917.4476        | 459.2274         | 916.4635        | 458.7354         | 8 |
| 3 | 30.0338  | <b>242.1499</b> | 121.5786        |                |                  |                |                  | G    | <b>863.4370</b> | <b>432.2221</b> | 846.4104        | 423.7089         | 845.4264        | 423.2169         | 7 |
| 4 | 86.0964  | 355.2340        | 178.1206        |                |                  |                |                  | L    | 806.4155        | 403.7114        | 789.3890        | 395.1981         | 788.4050        | 394.7061         | 6 |
| 5 | 120.0808 | 502.3024        | 251.6548        |                |                  |                |                  | F    | <b>693.3315</b> | 347.1694        | 676.3049        | 338.6561         | 675.3209        | 338.1641         | 5 |
| 6 | 87.0553  | 616.3453        | 308.6763        | 599.3188       | 300.1630         |                |                  | N    | <b>546.2631</b> | 273.6352        | <b>529.2365</b> | 265.1219         | <b>528.2525</b> | 264.6299         | 4 |
| 7 | 102.0550 | 745.3879        | 373.1976        | 728.3614       | 364.6843         | 727.3774       | 364.1923         | E    | <b>432.2201</b> | 216.6137        | 415.1936        | 208.1004         | 414.2096        | 207.6084         | 3 |
| 8 | 101.0709 | 873.4465        | 437.2269        | 856.4199       | 428.7136         | 855.4359       | 428.2216         | Q    | <b>303.1775</b> | 152.0924        | 286.1510        | 143.5791         |                 |                  | 2 |
| 9 | 129.1135 |                 |                 |                |                  |                |                  | R    | 175.1190        | 88.0631         | 158.0924        | 79.5498          |                 |                  | 1 |



MS/MS Fragmentation of **DFLLQQTMLR**

Found in **Q04760**, Q04760|LGUL\_HUMAN Lactoylglutathione lyase OS=Homo sapiens GN=GLO1 PE=1 SV=4

Match to Query 515: 1279.702918 from(640.858735,2+)

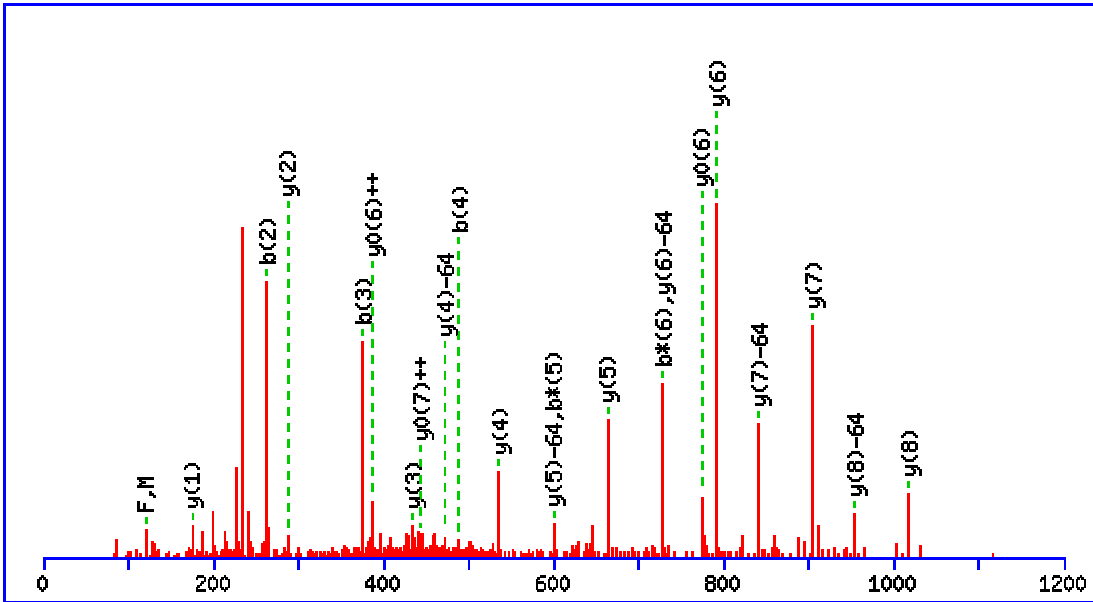

Monoisotopic mass of neutral peptide  $M_r(\text{calc})$ : 1279.6595

Fixed modifications: Carbamidomethyl (C)

Variable modifications:

**M8** : Oxidation (M), with neutral losses 0.0000 (shown in table), 63.9983

Ions Score: 68 Expect: 1e-005

Matches (**Bold Red**): 23/157 fragment ions using 32 most intense peaks

| #  | Immon.          | b               | b <sup>++</sup> | b <sup>*</sup>  | b <sup>*++</sup> | b <sup>0</sup> | b <sup>0++</sup> | Seq.     | y                | y <sup>++</sup> | y <sup>*</sup> | y <sup>*++</sup> | y <sup>0</sup>  | y <sup>0++</sup> | #         |
|----|-----------------|-----------------|-----------------|-----------------|------------------|----------------|------------------|----------|------------------|-----------------|----------------|------------------|-----------------|------------------|-----------|
| 1  | 88.0393         | 116.0342        | 58.5207         |                 |                  | 98.0237        | 49.5155          | <b>D</b> |                  |                 |                |                  |                 |                  | <b>10</b> |
| 2  | <b>120.0808</b> | <b>263.1026</b> | 132.0550        |                 |                  | 245.0921       | 123.0497         | <b>F</b> | 1165.6398        | 583.3235        | 1148.6132      | 574.8103         | 1147.6292       | 574.3183         | <b>9</b>  |
| 3  | 86.0964         | <b>376.1867</b> | 188.5970        |                 |                  | 358.1761       | 179.5917         | <b>L</b> | <b>1018.5714</b> | 509.7893        | 1001.5448      | 501.2761         | 1000.5608       | 500.7840         | <b>8</b>  |
| 4  | 86.0964         | <b>489.2708</b> | 245.1390        |                 |                  | 471.2602       | 236.1337         | <b>L</b> | <b>905.4873</b>  | 453.2473        | 888.4608       | 444.7340         | 887.4768        | <b>444.2420</b>  | <b>7</b>  |
| 5  | 101.0709        | 617.3293        | 309.1683        | <b>600.3028</b> | 300.6550         | 599.3188       | 300.1630         | <b>Q</b> | <b>792.4033</b>  | 396.7053        | 775.3767       | 388.1920         | <b>774.3927</b> | <b>387.7000</b>  | <b>6</b>  |
| 6  | 101.0709        | 745.3879        | 373.1976        | <b>728.3614</b> | 364.6843         | 727.3774       | 364.1923         | <b>Q</b> | <b>664.3447</b>  | 332.6760        | 647.3181       | 324.1627         | 646.3341        | 323.6707         | <b>5</b>  |
| 7  | 74.0600         | 846.4356        | 423.7214        | 829.4090        | 415.2082         | 828.4250       | 414.7162         | <b>T</b> | <b>536.2861</b>  | 268.6467        | 519.2595       | 260.1334         | 518.2755        | 259.6414         | <b>4</b>  |
| 8  | <b>120.0478</b> | 993.4710        | 497.2391        | 976.4445        | 488.7259         | 975.4604       | 488.2339         | <b>M</b> | <b>435.2384</b>  | 218.1228        | 418.2119       | 209.6096         |                 |                  | <b>3</b>  |
| 9  | 86.0964         | 1106.5551       | 553.7812        | 1089.5285       | 545.2679         | 1088.5445      | 544.7759         | <b>L</b> | <b>288.2030</b>  | 144.6051        | 271.1765       | 136.0919         |                 |                  | <b>2</b>  |
| 10 | 129.1135        |                 |                 |                 |                  |                |                  | <b>R</b> | <b>175.1190</b>  | 88.0631         | 158.0924       | 79.5498          |                 |                  | <b>1</b>  |

MS/MS Fragmentation of **CNSLSTLEK**

Found in **P13473**, P13473|LAMP2\_HUMAN Lysosome-associated membrane glycoprotein 2 OS=Homo sapiens GN=LAMP2 PE=1 SV=2

Match to Query 201: 1050.318548 from(526.166550,2+)

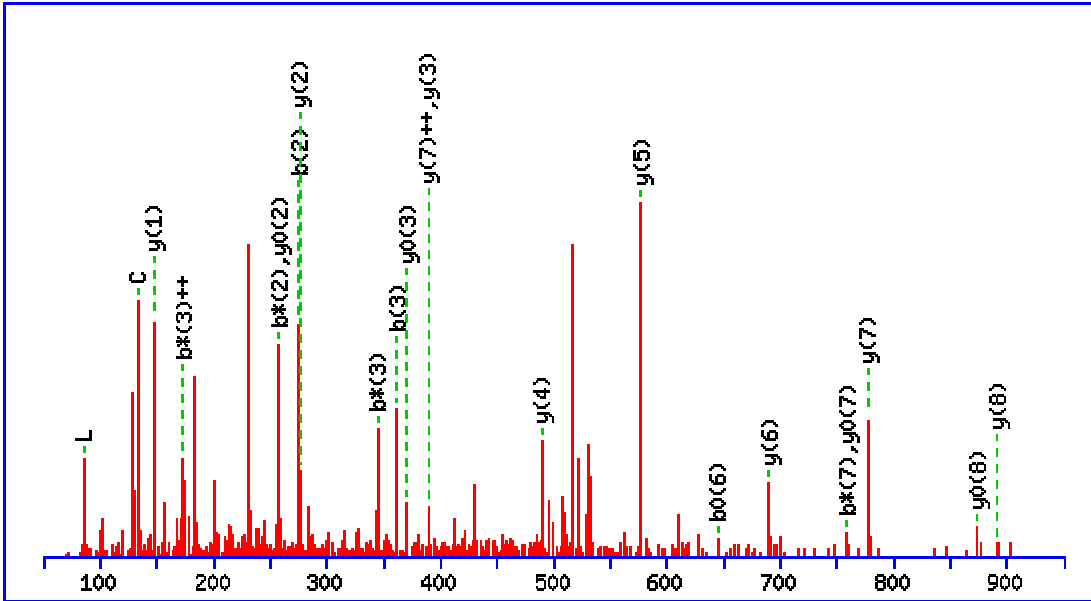

Monoisotopic mass of neutral peptide Mr(calc): 1050.5015

Fixed modifications: Carbamidomethyl (C)

Ions Score: 58 Expect: 7.4e-005

Matches (Bold Red): 23/97 fragment ions using 36 most intense peaks

| # | Immon.          | b               | b <sup>++</sup> | b*              | b <sup>*++</sup> | b <sup>0</sup>  | b <sup>0++</sup> | Seq. | y               | y <sup>++</sup> | y*       | y <sup>*++</sup> | y <sup>0</sup>  | y <sup>0++</sup> | # |
|---|-----------------|-----------------|-----------------|-----------------|------------------|-----------------|------------------|------|-----------------|-----------------|----------|------------------|-----------------|------------------|---|
| 1 | <b>133.0430</b> | 161.0379        | 81.0226         |                 |                  |                 |                  | C    |                 |                 |          |                  |                 |                  | 9 |
| 2 | 87.0553         | <b>275.0809</b> | 138.0441        | <b>258.0543</b> | 129.5308         |                 |                  | N    | <b>891.4782</b> | 446.2427        | 874.4516 | 437.7295         | <b>873.4676</b> | 437.2374         | 8 |
| 3 | 60.0444         | <b>362.1129</b> | 181.5601        | <b>345.0863</b> | <b>173.0468</b>  | 344.1023        | 172.5548         | S    | <b>777.4353</b> | <b>389.2213</b> | 760.4087 | 380.7080         | <b>759.4247</b> | 380.2160         | 7 |
| 4 | <b>86.0964</b>  | 475.1969        | 238.1021        | 458.1704        | 229.5888         | 457.1864        | 229.0968         | L    | <b>690.4032</b> | 345.7053        | 673.3767 | 337.1920         | 672.3927        | 336.7000         | 6 |
| 5 | 60.0444         | 562.2290        | 281.6181        | 545.2024        | 273.1048         | 544.2184        | 272.6128         | S    | <b>577.3192</b> | 289.1632        | 560.2926 | 280.6499         | 559.3086        | 280.1579         | 5 |
| 6 | 74.0600         | 663.2767        | 332.1420        | 646.2501        | 323.6287         | <b>645.2661</b> | 323.1367         | T    | <b>490.2871</b> | 245.6472        | 473.2606 | 237.1339         | 472.2766        | 236.6419         | 4 |
| 7 | <b>86.0964</b>  | 776.3607        | 388.6840        | <b>759.3342</b> | 380.1707         | 758.3501        | 379.6787         | L    | <b>389.2395</b> | 195.1234        | 372.2129 | 186.6101         | <b>371.2289</b> | 186.1181         | 3 |
| 8 | 102.0550        | 905.4033        | 453.2053        | 888.3768        | 444.6920         | 887.3927        | 444.2000         | E    | <b>276.1554</b> | 138.5813        | 259.1288 | 130.0681         | <b>258.1448</b> | 129.5761         | 2 |
| 9 | 101.1073        |                 |                 |                 |                  |                 |                  | K    | <b>147.1128</b> | 74.0600         | 130.0863 | 65.5468          |                 |                  | 1 |

MS/MS Fragmentation of **SDASCTAGSAGTHSNGVSTGR**

Found in **Q99571**, Q99571|P2RX4\_HUMAN P2X purinoceptor 4 OS=Homo sapiens GN=P2RX4 PE=2 SV=2

Match to Query 515: 1978.983351 from(660.668393,3+)

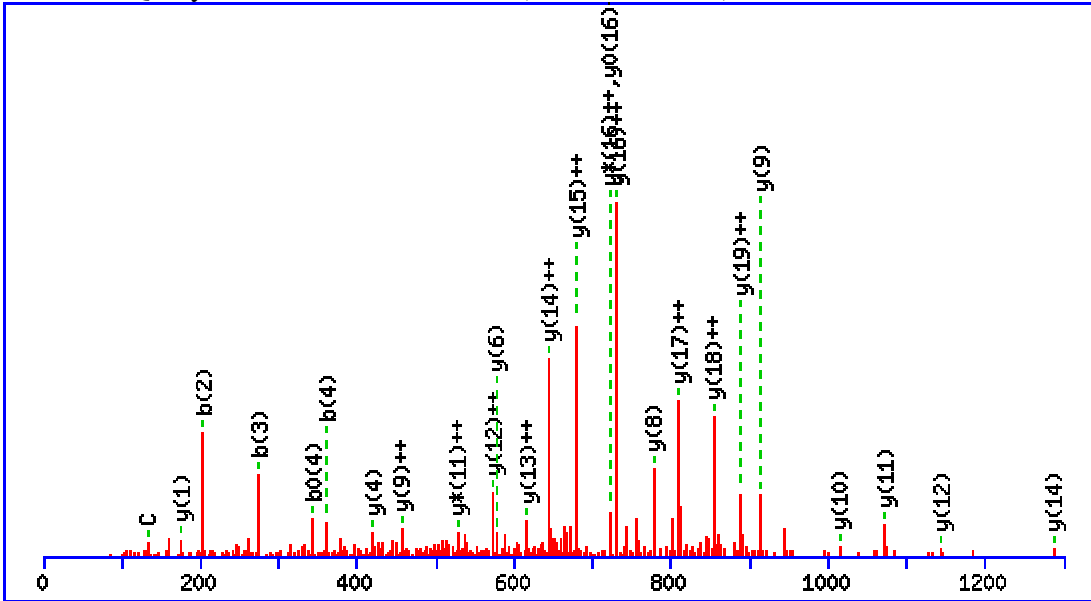

Monoisotopic mass of neutral peptide  $M_r(\text{calc})$ : 1978.8399

Fixed modifications: Carbamidomethyl (C)

Ions Score: 89 Expect: 7.3e-008

Matches (Bold Red): 26/229 fragment ions using 37 most intense peaks

| #  | Immon.          | b               | b <sup>++</sup> | b*        | b <sup>***</sup> | b <sup>0</sup>  | b <sup>0++</sup> | Seq. | y                | y <sup>++</sup> | y*        | y <sup>***</sup> | y <sup>0</sup> | y <sup>0++</sup> | #  |
|----|-----------------|-----------------|-----------------|-----------|------------------|-----------------|------------------|------|------------------|-----------------|-----------|------------------|----------------|------------------|----|
| 1  | 60.0444         | 88.0393         | 44.5233         |           |                  | 70.0287         | 35.5180          | S    |                  |                 |           |                  |                |                  | 21 |
| 2  | 88.0393         | <b>203.0662</b> | 102.0368        |           |                  | 185.0557        | 93.0315          | D    | 1892.8151        | 946.9112        | 1875.7886 | 938.3979         | 1874.8046      | 937.9059         | 20 |
| 3  | 44.0495         | <b>274.1034</b> | 137.5553        |           |                  | 256.0928        | 128.5500         | A    | 1777.7882        | <b>889.3977</b> | 1760.7617 | 880.8845         | 1759.7776      | 880.3925         | 19 |
| 4  | 60.0444         | <b>361.1354</b> | 181.0713        |           |                  | <b>343.1248</b> | 172.0660         | S    | 1706.7511        | <b>853.8792</b> | 1689.7245 | 845.3659         | 1688.7405      | 844.8739         | 18 |
| 5  | <b>133.0430</b> | 521.1660        | 261.0867        |           |                  | 503.1555        | 252.0814         | C    | 1619.7191        | <b>810.3632</b> | 1602.6925 | 801.8499         | 1601.7085      | 801.3579         | 17 |
| 6  | 74.0600         | 622.2137        | 311.6105        |           |                  | 604.2032        | 302.6052         | T    | 1459.6884        | <b>730.3478</b> | 1442.6619 | <b>721.8346</b>  | 1441.6778      | <b>721.3426</b>  | 16 |
| 7  | 44.0495         | 693.2508        | 347.1291        |           |                  | 675.2403        | 338.1238         | A    | 1358.6407        | <b>679.8240</b> | 1341.6142 | 671.3107         | 1340.6302      | 670.8187         | 15 |
| 8  | 30.0338         | 750.2723        | 375.6398        |           |                  | 732.2617        | 366.6345         | G    | <b>1287.6036</b> | <b>644.3054</b> | 1270.5771 | 635.7922         | 1269.5931      | 635.3002         | 14 |
| 9  | 60.0444         | 837.3043        | 419.1558        |           |                  | 819.2938        | 410.1505         | S    | 1230.5822        | <b>615.7947</b> | 1213.5556 | 607.2814         | 1212.5716      | 606.7894         | 13 |
| 10 | 44.0495         | 908.3414        | 454.6744        |           |                  | 890.3309        | 445.6691         | A    | <b>1143.5501</b> | <b>572.2787</b> | 1126.5236 | 563.7654         | 1125.5396      | 563.2734         | 12 |
| 11 | 30.0338         | 965.3629        | 483.1851        |           |                  | 947.3523        | 474.1798         | G    | <b>1072.5130</b> | 536.7601        | 1055.4865 | <b>528.2469</b>  | 1054.5024      | 527.7549         | 11 |
| 12 | 74.0600         | 1066.4106       | 533.7089        |           |                  | 1048.4000       | 524.7036         | T    | <b>1015.4915</b> | 508.2494        | 998.4650  | 499.7361         | 997.4810       | 499.2441         | 10 |
| 13 | 110.0713        | 1203.4695       | 602.2384        |           |                  | 1185.4589       | 593.2331         | H    | <b>914.4439</b>  | <b>457.7256</b> | 897.4173  | 449.2123         | 896.4333       | 448.7203         | 9  |
| 14 | 60.0444         | 1290.5015       | 645.7544        |           |                  | 1272.4910       | 636.7491         | S    | <b>777.3850</b>  | 389.1961        | 760.3584  | 380.6828         | 759.3744       | 380.1908         | 8  |
| 15 | 87.0553         | 1404.5444       | 702.7759        | 1387.5179 | 694.2626         | 1386.5339       | 693.7706         | N    | 690.3529         | 345.6801        | 673.3264  | 337.1668         | 672.3424       | 336.6748         | 7  |
| 16 | 30.0338         | 1461.5659       | 731.2866        | 1444.5394 | 722.7733         | 1443.5553       | 722.2813         | G    | <b>576.3100</b>  | 288.6586        | 559.2835  | 280.1454         | 558.2994       | 279.6534         | 6  |
| 17 | 72.0808         | 1560.6343       | 780.8208        | 1543.6078 | 772.3075         | 1542.6238       | 771.8155         | V    | 519.2885         | 260.1479        | 502.2620  | 251.6346         | 501.2780       | 251.1426         | 5  |
| 18 | 60.0444         | 1647.6664       | 824.3368        | 1630.6398 | 815.8235         | 1629.6558       | 815.3315         | S    | <b>420.2201</b>  | 210.6137        | 403.1936  | 202.1004         | 402.2096       | 201.6084         | 4  |
| 19 | 74.0600         | 1748.7140       | 874.8607        | 1731.6875 | 866.3474         | 1730.7035       | 865.8554         | T    | 333.1881         | 167.0977        | 316.1615  | 158.5844         | 315.1775       | 158.0924         | 3  |
| 20 | 30.0338         | 1805.7355       | 903.3714        | 1788.7089 | 894.8581         | 1787.7249       | 894.3661         | G    | 232.1404         | 116.5738        | 215.1139  | 108.0606         |                |                  | 2  |
| 21 | 129.1135        |                 |                 |           |                  |                 |                  | R    | <b>175.1190</b>  | 88.0631         | 158.0924  | 79.5498          |                |                  | 1  |

MS/MS Fragmentation of **ADEGISFR**

Found in **Q06830**, Q06830|PRDX1\_HUMAN Peroxiredoxin-1 OS=Homo sapiens GN=PRDX1 PE=1 SV=1

Match to Query 80: 893.367418 from(447.690985,2+)

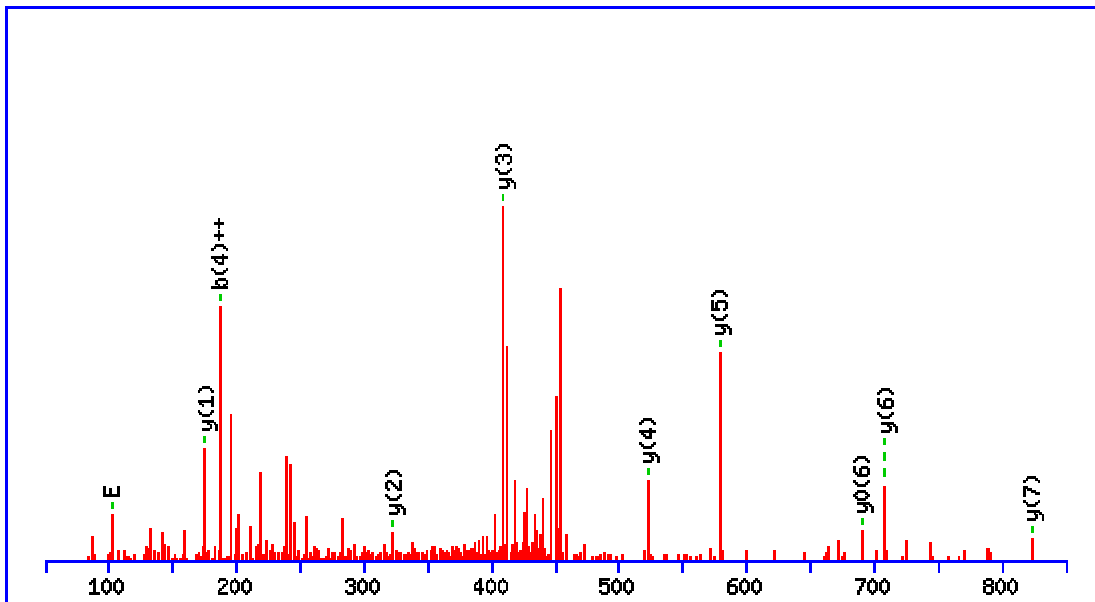

**Monoisotopic mass of neutral peptide Mr(calc):** 893.4243

**Fixed modifications:** Carbamidomethyl (C)

**Ions Score:** 53 **Expect:** 0.00033

**Matches (Bold Red):** 11/72 fragment ions using 32 most intense peaks

| # | Immon.          | b               | b <sup>++</sup> | b <sup>0</sup> | b <sup>0++</sup> | Seq. | y               | y <sup>++</sup> | y <sup>*</sup> | y <sup>*++</sup> | y <sup>0</sup>  | y <sup>0++</sup> | # |
|---|-----------------|-----------------|-----------------|----------------|------------------|------|-----------------|-----------------|----------------|------------------|-----------------|------------------|---|
| 1 | 44.0495         | 72.0444         | 36.5258         |                |                  | A    |                 |                 |                |                  |                 |                  | 8 |
| 2 | 88.0393         | <b>187.0713</b> | 94.0393         | 169.0608       | 85.0340          | D    | <b>823.3945</b> | 412.2009        | 806.3679       | 403.6876         | 805.3839        | 403.1956         | 7 |
| 3 | <b>102.0550</b> | 316.1139        | 158.5606        | 298.1034       | 149.5553         | E    | <b>708.3675</b> | 354.6874        | 691.3410       | 346.1741         | <b>690.3569</b> | 345.6821         | 6 |
| 4 | 30.0338         | 373.1354        | <b>187.0713</b> | 355.1248       | 178.0661         | G    | <b>579.3249</b> | 290.1661        | 562.2984       | 281.6528         | 561.3144        | 281.1608         | 5 |
| 5 | 86.0964         | 486.2195        | 243.6134        | 468.2089       | 234.6081         | I    | <b>522.3035</b> | 261.6554        | 505.2769       | 253.1421         | 504.2929        | 252.6501         | 4 |
| 6 | 60.0444         | 573.2515        | 287.1294        | 555.2409       | 278.1241         | S    | <b>409.2194</b> | 205.1133        | 392.1928       | 196.6001         | 391.2088        | 196.1081         | 3 |
| 7 | 120.0808        | 720.3199        | 360.6636        | 702.3093       | 351.6583         | F    | <b>322.1874</b> | 161.5973        | 305.1608       | 153.0840         |                 |                  | 2 |
| 8 | 129.1135        |                 |                 |                |                  | R    | <b>175.1190</b> | 88.0631         | 158.0924       | 79.5498          |                 |                  | 1 |

MS/MS Fragmentation of **ATAVMPDGQFK**

Found in **Q06830**, Q06830|PRDX1\_HUMAN Peroxiredoxin-1 OS=Homo sapiens GN=PRDX1 PE=1 SV=1

Match to Query 395: 1179.585206 from(590.799879,2+)

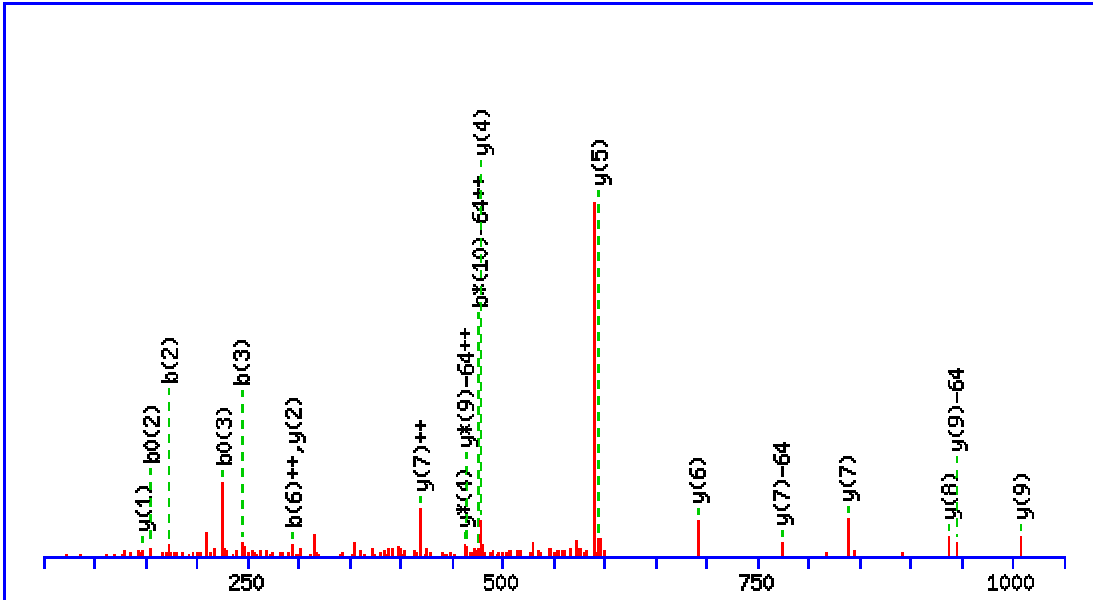

Monoisotopic mass of neutral peptide Mr(calc): 1179.5594

Fixed modifications: Carbamidomethyl (C)

Variable modifications:

M5 : Oxidation (M), with neutral losses 0.0000(shown in table), 63.9983

Ions Score: 46 Expect: 0.0017

Matches (Bold Red): 19/158 fragment ions using 33 most intense peaks

| #  | Immon.   | b               | b <sup>++</sup> | b <sup>*</sup> | b <sup>*++</sup> | b <sup>0</sup>  | b <sup>0++</sup> | Seq. | y                | y <sup>++</sup> | y <sup>*</sup>  | y <sup>*++</sup> | y <sup>0</sup> | y <sup>0++</sup> | #  |
|----|----------|-----------------|-----------------|----------------|------------------|-----------------|------------------|------|------------------|-----------------|-----------------|------------------|----------------|------------------|----|
| 1  | 44.0495  | 72.0444         | 36.5258         |                |                  |                 |                  | A    |                  |                 |                 |                  |                |                  | 11 |
| 2  | 74.0600  | <b>173.0921</b> | 87.0497         |                |                  | <b>155.0815</b> | 78.0444          | T    | 1109.5296        | 555.2684        | 1092.5030       | 546.7552         | 1091.5190      | 546.2631         | 10 |
| 3  | 44.0495  | <b>244.1292</b> | 122.5682        |                |                  | <b>226.1186</b> | 113.5629         | A    | <b>1008.4819</b> | 504.7446        | 991.4554        | 496.2313         | 990.4713       | 495.7393         | 9  |
| 4  | 72.0808  | 343.1976        | 172.1024        |                |                  | 325.1870        | 163.0972         | V    | <b>937.4448</b>  | 469.2260        | 920.4182        | 460.7128         | 919.4342       | 460.2207         | 8  |
| 5  | 120.0478 | 490.2330        | 245.6201        |                |                  | 472.2224        | 236.6149         | M    | <b>838.3764</b>  | <b>419.6918</b> | 821.3498        | 411.1785         | 820.3658       | 410.6865         | 7  |
| 6  | 70.0651  | 587.2858        | <b>294.1465</b> |                |                  | 569.2752        | 285.1412         | P    | <b>691.3410</b>  | 346.1741        | 674.3144        | 337.6608         | 673.3304       | 337.1688         | 6  |
| 7  | 88.0393  | 702.3127        | 351.6600        |                |                  | 684.3021        | 342.6547         | D    | <b>594.2882</b>  | 297.6477        | 577.2617        | 289.1345         | 576.2776       | 288.6425         | 5  |
| 8  | 30.0338  | 759.3342        | 380.1707        |                |                  | 741.3236        | 371.1654         | G    | <b>479.2613</b>  | 240.1343        | <b>462.2347</b> | 231.6210         |                |                  | 4  |
| 9  | 101.0709 | 887.3927        | 444.2000        | 870.3662       | 435.6867         | 869.3822        | 435.1947         | Q    | 422.2398         | 211.6235        | 405.2132        | 203.1103         |                |                  | 3  |
| 10 | 120.0808 | 1034.4612       | 517.7342        | 1017.4346      | 509.2209         | 1016.4506       | 508.7289         | F    | <b>294.1812</b>  | 147.5942        | 277.1547        | 139.0810         |                |                  | 2  |
| 11 | 101.1073 |                 |                 |                |                  |                 |                  | K    | <b>147.1128</b>  | 74.0600         | 130.0863        | 65.5468          |                |                  | 1  |

MS/MS Fragmentation of **SAAQAAAQTNSNAAGK**

Found in **Q8NC51**, Q8NC51|PAIRB\_HUMAN Plasminogen activator inhibitor 1 RNA-binding protein  
 OS=Homo sapiens GN=SERBP1 PE=1 SV=2

Match to Query 383: 1459.692142 from(730.853347,2+)

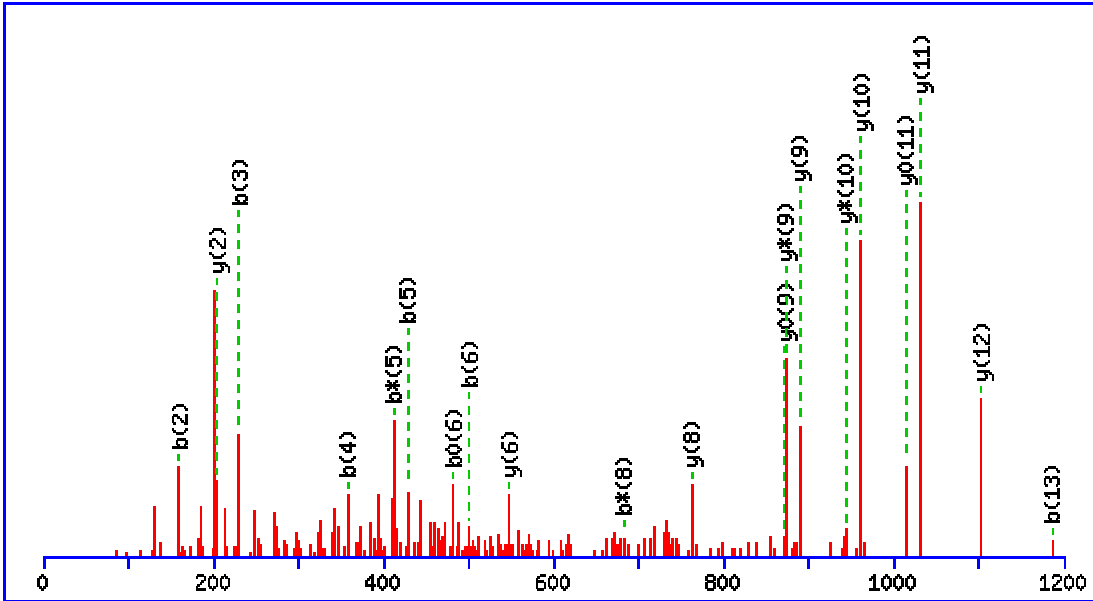

Monoisotopic mass of neutral peptide Mr(calc): 1459.7015

Fixed modifications: Carbamidomethyl (C)

Ions Score: 51 Expect: 0.00061

Matches (Bold Red): 20/180 fragment ions using 39 most intense peaks

| #  | Immon.   | b                | b <sup>++</sup> | b*              | b <sup>*++</sup> | b <sup>0</sup>  | b <sup>0++</sup> | Seq. | y                | y <sup>++</sup> | y*              | y <sup>*++</sup> | y <sup>0</sup>   | y <sup>0++</sup> | #  |
|----|----------|------------------|-----------------|-----------------|------------------|-----------------|------------------|------|------------------|-----------------|-----------------|------------------|------------------|------------------|----|
| 1  | 60.0444  | 88.0393          | 44.5233         |                 |                  | 70.0287         | 35.5180          | S    |                  |                 |                 |                  |                  |                  | 16 |
| 2  | 44.0495  | <b>159.0764</b>  | 80.0418         |                 |                  | 141.0659        | 71.0366          | A    | 1373.6768        | 687.3420        | 1356.6502       | 678.8288         | 1355.6662        | 678.3367         | 15 |
| 3  | 44.0495  | <b>230.1135</b>  | 115.5604        |                 |                  | 212.1030        | 106.5551         | A    | 1302.6397        | 651.8235        | 1285.6131       | 643.3102         | 1284.6291        | 642.8182         | 14 |
| 4  | 101.0709 | <b>358.1721</b>  | 179.5897        | 341.1456        | 171.0764         | 340.1615        | 170.5844         | Q    | 1231.6026        | 616.3049        | 1214.5760       | 607.7916         | 1213.5920        | 607.2996         | 13 |
| 5  | 44.0495  | <b>429.2092</b>  | 215.1083        | <b>412.1827</b> | 206.5950         | 411.1987        | 206.1030         | A    | <b>1103.5440</b> | 552.2756        | 1086.5174       | 543.7624         | 1085.5334        | 543.2703         | 12 |
| 6  | 44.0495  | <b>500.2463</b>  | 250.6268        | 483.2198        | 242.1135         | <b>482.2358</b> | 241.6215         | A    | <b>1032.5069</b> | 516.7571        | 1015.4803       | 508.2438         | <b>1014.4963</b> | 507.7518         | 11 |
| 7  | 44.0495  | 571.2835         | 286.1454        | 554.2569        | 277.6321         | 553.2729        | 277.1401         | A    | <b>961.4697</b>  | 481.2385        | <b>944.4432</b> | 472.7252         | 943.4592         | 472.2332         | 10 |
| 8  | 101.0709 | 699.3420         | 350.1747        | <b>682.3155</b> | 341.6614         | 681.3315        | 341.1694         | Q    | <b>890.4326</b>  | 445.7200        | <b>873.4061</b> | 437.2067         | <b>872.4221</b>  | 436.7147         | 9  |
| 9  | 74.0600  | 800.3897         | 400.6985        | 783.3632        | 392.1852         | 782.3791        | 391.6932         | T    | <b>762.3741</b>  | 381.6907        | 745.3475        | 373.1774         | 744.3635         | 372.6854         | 8  |
| 10 | 87.0553  | 914.4326         | 457.7200        | 897.4061        | 449.2067         | 896.4221        | 448.7147         | N    | 661.3264         | 331.1668        | 644.2998        | 322.6536         | 643.3158         | 322.1615         | 7  |
| 11 | 60.0444  | 1001.4647        | 501.2360        | 984.4381        | 492.7227         | 983.4541        | 492.2307         | S    | <b>547.2835</b>  | 274.1454        | 530.2569        | 265.6321         | 529.2729         | 265.1401         | 6  |
| 12 | 87.0553  | 1115.5076        | 558.2574        | 1098.4810       | 549.7442         | 1097.4970       | 549.2522         | N    | 460.2514         | 230.6293        | 443.2249        | 222.1161         |                  |                  | 5  |
| 13 | 44.0495  | <b>1186.5447</b> | 593.7760        | 1169.5182       | 585.2627         | 1168.5341       | 584.7707         | A    | 346.2085         | 173.6079        | 329.1819        | 165.0946         |                  |                  | 4  |
| 14 | 44.0495  | 1257.5818        | 629.2945        | 1240.5553       | 620.7813         | 1239.5713       | 620.2893         | A    | 275.1714         | 138.0893        | 258.1448        | 129.5761         |                  |                  | 3  |
| 15 | 30.0338  | 1314.6033        | 657.8053        | 1297.5767       | 649.2920         | 1296.5927       | 648.8000         | G    | <b>204.1343</b>  | 102.5708        | 187.1077        | 94.0575          |                  |                  | 2  |
| 16 | 101.1073 |                  |                 |                 |                  |                 |                  | K    | 147.1128         | 74.0600         | 130.0863        | 65.5468          |                  |                  | 1  |

MS/MS Fragmentation of **I**EDGNNFGVAV**Q**E**K**

Found in **Q06323**, Q06323|PSME1\_HUMAN Proteasome activator complex subunit 1 OS=Homo sapiens  
GN=PSME1 PE=1 SV=1

Match to Query 397: 1518.687830 from(760.351191,2+)

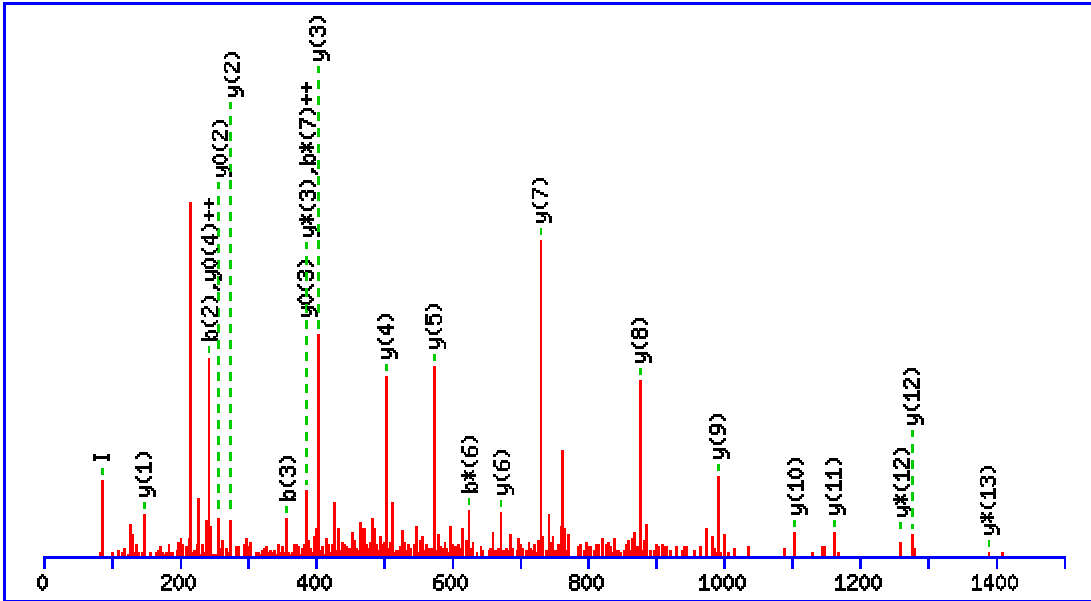

Monoisotopic mass of neutral peptide **Mr(calc)**: 1518.7314

**Fixed modifications**: Carbamidomethyl (C)

**Ions Score**: 95 **Expect**: 2.4e-008

**Matches (Bold Red)**: 23/158 fragment ions using 33 most intense peaks

| #  | Immon.         | b               | b <sup>++</sup> | b <sup>*</sup>  | b <sup>*++</sup> | b <sup>0</sup> | b <sup>0++</sup> | Seq.     | y                | y <sup>++</sup> | y <sup>*</sup>   | y <sup>*++</sup> | y <sup>0</sup>  | y <sup>0++</sup> | #         |
|----|----------------|-----------------|-----------------|-----------------|------------------|----------------|------------------|----------|------------------|-----------------|------------------|------------------|-----------------|------------------|-----------|
| 1  | <b>86.0964</b> | 114.0913        | 57.5493         |                 |                  |                |                  | <b>I</b> |                  |                 |                  |                  |                 |                  | <b>14</b> |
| 2  | 102.0550       | <b>243.1339</b> | 122.0706        |                 |                  | 225.1234       | 113.0653         | <b>E</b> | 1406.6546        | 703.8310        | <b>1389.6281</b> | 695.3177         | 1388.6441       | 694.8257         | <b>13</b> |
| 3  | 88.0393        | <b>358.1609</b> | 179.5841        |                 |                  | 340.1503       | 170.5788         | <b>D</b> | <b>1277.6121</b> | 639.3097        | <b>1260.5855</b> | 630.7964         | 1259.6015       | 630.3044         | <b>12</b> |
| 4  | 30.0338        | 415.1823        | 208.0948        |                 |                  | 397.1718       | 199.0895         | <b>G</b> | <b>1162.5851</b> | 581.7962        | 1145.5586        | 573.2829         | 1144.5745       | 572.7909         | <b>11</b> |
| 5  | 87.0553        | 529.2253        | 265.1163        | 512.1987        | 256.6030         | 511.2147       | 256.1110         | <b>N</b> | <b>1105.5636</b> | 553.2855        | 1088.5371        | 544.7722         | 1087.5531       | 544.2802         | <b>10</b> |
| 6  | 87.0553        | 643.2682        | 322.1377        | <b>626.2416</b> | 313.6245         | 625.2576       | 313.1325         | <b>N</b> | <b>991.5207</b>  | 496.2640        | 974.4942         | 487.7507         | 973.5102        | 487.2587         | <b>9</b>  |
| 7  | 120.0808       | 790.3366        | 395.6719        | 773.3101        | <b>387.1587</b>  | 772.3260       | 386.6667         | <b>F</b> | <b>877.4778</b>  | 439.2425        | 860.4512         | 430.7293         | 859.4672        | 430.2373         | <b>8</b>  |
| 8  | 30.0338        | 847.3581        | 424.1827        | 830.3315        | 415.6694         | 829.3475       | 415.1774         | <b>G</b> | <b>730.4094</b>  | 365.7083        | 713.3828         | 357.1951         | 712.3988        | 356.7030         | <b>7</b>  |
| 9  | 72.0808        | 946.4265        | 473.7169        | 929.3999        | 465.2036         | 928.4159       | 464.7116         | <b>V</b> | <b>673.3879</b>  | 337.1976        | 656.3614         | 328.6843         | 655.3774        | 328.1923         | <b>6</b>  |
| 10 | 44.0495        | 1017.4636       | 509.2354        | 1000.4371       | 500.7222         | 999.4530       | 500.2302         | <b>A</b> | <b>574.3195</b>  | 287.6634        | 557.2930         | 279.1501         | 556.3089        | 278.6581         | <b>5</b>  |
| 11 | 72.0808        | 1116.5320       | 558.7696        | 1099.5055       | 550.2564         | 1098.5214      | 549.7644         | <b>V</b> | <b>503.2824</b>  | 252.1448        | 486.2558         | 243.6316         | 485.2718        | <b>243.1395</b>  | <b>4</b>  |
| 12 | 101.0709       | 1244.5906       | 622.7989        | 1227.5640       | 614.2857         | 1226.5800      | 613.7937         | <b>Q</b> | <b>404.2140</b>  | 202.6106        | <b>387.1874</b>  | 194.0974         | <b>386.2034</b> | 193.6053         | <b>3</b>  |
| 13 | 102.0550       | 1373.6332       | 687.3202        | 1356.6066       | 678.8070         | 1355.6226      | 678.3149         | <b>E</b> | <b>276.1554</b>  | 138.5813        | 259.1288         | 130.0681         | <b>258.1448</b> | 129.5761         | <b>2</b>  |
| 14 | 101.1073       |                 |                 |                 |                  |                |                  | <b>K</b> | <b>147.1128</b>  | 74.0600         | 130.0863         | 65.5468          |                 |                  | <b>1</b>  |

MS/MS Fragmentation of **TTIFSPEGR**

Found in **P25789**, P25789|PSA4\_HUMAN Proteasome subunit alpha type-4 OS=Homo sapiens GN=PSMA4 PE=1 SV=1

Match to Query 282: 1006.460818 from(504.237685,2+)

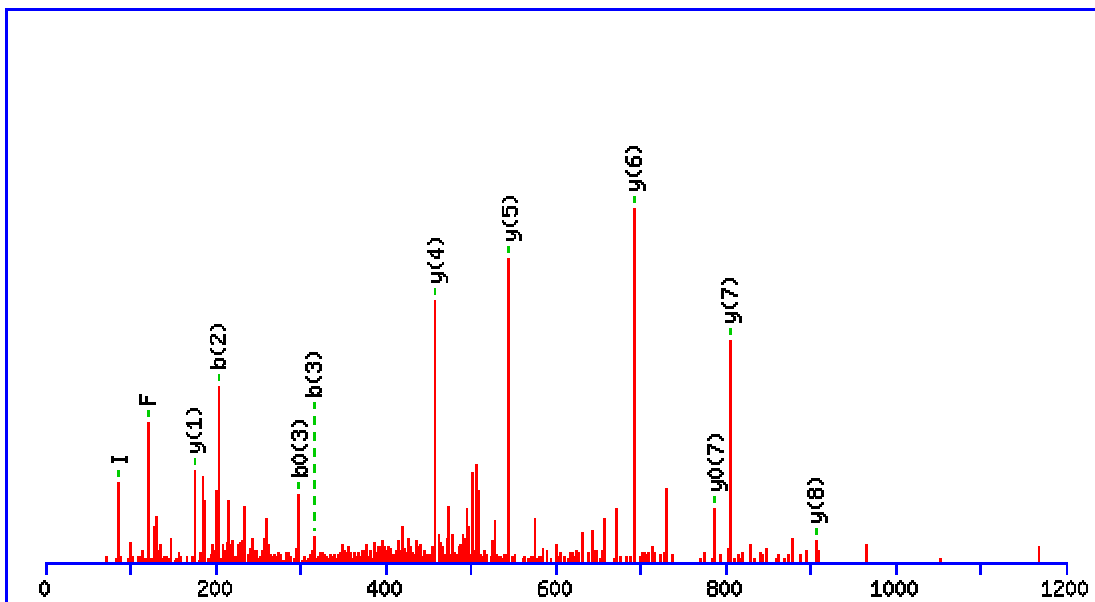

Monoisotopic mass of neutral peptide  $M_r(\text{calc})$ : 1006.5084

Fixed modifications: Carbamidomethyl (C)

Ions Score: 44 Expect: 0.0029

Matches (**Bold Red**): 12/85 fragment ions using 19 most intense peaks

| # | Immon.          | b               | b <sup>++</sup> | b <sup>0</sup>  | b <sup>0++</sup> | Seq. | y               | y <sup>++</sup> | y*       | y <sup>*++</sup> | y <sup>0</sup>  | y <sup>0++</sup> | # |
|---|-----------------|-----------------|-----------------|-----------------|------------------|------|-----------------|-----------------|----------|------------------|-----------------|------------------|---|
| 1 | 74.0600         | 102.0550        | 51.5311         | 84.0444         | 42.5258          | T    |                 |                 |          |                  |                 |                  | 9 |
| 2 | 74.0600         | <b>203.1026</b> | 102.0550        | 185.0921        | 93.0497          | T    | <b>906.4680</b> | 453.7376        | 889.4414 | 445.2243         | 888.4574        | 444.7323         | 8 |
| 3 | <b>86.0964</b>  | <b>316.1867</b> | 158.5970        | <b>298.1761</b> | 149.5917         | I    | <b>805.4203</b> | 403.2138        | 788.3937 | 394.7005         | <b>787.4097</b> | 394.2085         | 7 |
| 4 | <b>120.0808</b> | 463.2551        | 232.1312        | 445.2445        | 223.1259         | F    | <b>692.3362</b> | 346.6717        | 675.3097 | 338.1585         | 674.3257        | 337.6665         | 6 |
| 5 | 60.0444         | 550.2871        | 275.6472        | 532.2766        | 266.6419         | S    | <b>545.2678</b> | 273.1375        | 528.2413 | 264.6243         | 527.2572        | 264.1323         | 5 |
| 6 | 70.0651         | 647.3399        | 324.1736        | 629.3293        | 315.1683         | P    | <b>458.2358</b> | 229.6215        | 441.2092 | 221.1083         | 440.2252        | 220.6162         | 4 |
| 7 | 102.0550        | 776.3825        | 388.6949        | 758.3719        | 379.6896         | E    | 361.1830        | 181.0951        | 344.1565 | 172.5819         | 343.1724        | 172.0899         | 3 |
| 8 | 30.0338         | 833.4040        | 417.2056        | 815.3934        | 408.2003         | G    | 232.1404        | 116.5738        | 215.1139 | 108.0606         |                 |                  | 2 |
| 9 | 129.1135        |                 |                 |                 |                  | R    | <b>175.1190</b> | 88.0631         | 158.0924 | 79.5498          |                 |                  | 1 |



MS/MS Fragmentation of **VAASNIVQMK**

Found in **P49721**, P49721|PSB2\_HUMAN Proteasome subunit beta type-2 OS=Homo sapiens GN=PSMB2 PE=1 SV=1

Match to Query 381: 1075.597250 from(538.805901,2,+)

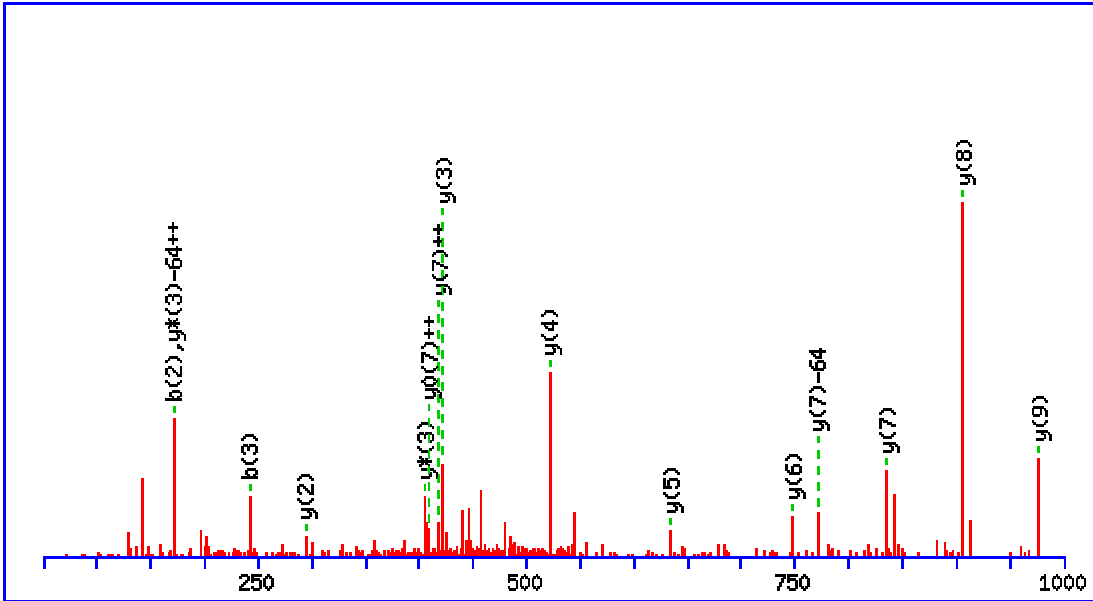

**Monoisotopic mass of neutral peptide Mr(calc):** 1075.5696

**Fixed modifications:** Carbamidomethyl (C)

**Variable modifications:**

**M9** : Oxidation (M), with neutral losses 0.0000(shown in table), 63.9983

**Ions Score:** 71 **Expect:** 5.6e-006

**Matches (Bold Red):** 15/137 fragment ions using 18 most intense peaks

| #         | Immon.   | b               | b <sup>++</sup> | b <sup>*</sup> | b <sup>+++</sup> | b <sup>0</sup> | b <sup>0++</sup> | Seq.     | y               | y <sup>++</sup> | y <sup>*</sup>  | y <sup>***</sup> | y <sup>0</sup> | y <sup>0++</sup> | #         |
|-----------|----------|-----------------|-----------------|----------------|------------------|----------------|------------------|----------|-----------------|-----------------|-----------------|------------------|----------------|------------------|-----------|
| <b>1</b>  | 72.0808  | 100.0757        | 50.5415         |                |                  |                |                  | <b>V</b> |                 |                 |                 |                  |                |                  | <b>10</b> |
| <b>2</b>  | 44.0495  | <b>171.1128</b> | 86.0600         |                |                  |                |                  | <b>A</b> | <b>977.5084</b> | 489.2579        | 960.4819        | 480.7446         | 959.4979       | 480.2526         | <b>9</b>  |
| <b>3</b>  | 44.0495  | <b>242.1499</b> | 121.5786        |                |                  |                |                  | <b>A</b> | <b>906.4713</b> | 453.7393        | 889.4448        | 445.2260         | 888.4608       | 444.7340         | <b>8</b>  |
| <b>4</b>  | 60.0444  | 329.1819        | 165.0946        |                |                  | 311.1714       | 156.0893         | <b>S</b> | <b>835.4342</b> | <b>418.2207</b> | 818.4077        | 409.7075         | 817.4237       | <b>409.2155</b>  | <b>7</b>  |
| <b>5</b>  | 87.0553  | 443.2249        | 222.1161        | 426.1983       | 213.6028         | 425.2143       | 213.1108         | <b>N</b> | <b>748.4022</b> | 374.7047        | 731.3756        | 366.1915         |                |                  | <b>6</b>  |
| <b>6</b>  | 86.0964  | 556.3089        | 278.6581        | 539.2824       | 270.1448         | 538.2984       | 269.6528         | <b>I</b> | <b>634.3593</b> | 317.6833        | 617.3327        | 309.1700         |                |                  | <b>5</b>  |
| <b>7</b>  | 72.0808  | 655.3774        | 328.1923        | 638.3508       | 319.6790         | 637.3668       | 319.1870         | <b>V</b> | <b>521.2752</b> | 261.1412        | 504.2487        | 252.6280         |                |                  | <b>4</b>  |
| <b>8</b>  | 101.0709 | 783.4359        | 392.2216        | 766.4094       | 383.7083         | 765.4254       | 383.2163         | <b>Q</b> | <b>422.2068</b> | 211.6070        | <b>405.1802</b> | 203.0938         |                |                  | <b>3</b>  |
| <b>9</b>  | 120.0478 | 930.4713        | 465.7393        | 913.4448       | 457.2260         | 912.4608       | 456.7340         | <b>M</b> | <b>294.1482</b> | 147.5777        | 277.1217        | 139.0645         |                |                  | <b>2</b>  |
| <b>10</b> | 101.1073 |                 |                 |                |                  |                |                  | <b>K</b> | 147.1128        | 74.0600         | 130.0863        | 65.5468          |                |                  | <b>1</b>  |

MS/MS Fragmentation of **GSTAPVGGGAFPTIVER**

Found in **Q15084**, Q15084|PDIA6\_HUMAN Protein disulfide-isomerase A6 OS=Homo sapiens GN=PDIA6 PE=1 SV=1

Match to Query 391: 1614.808706 from(808.411629,2+)

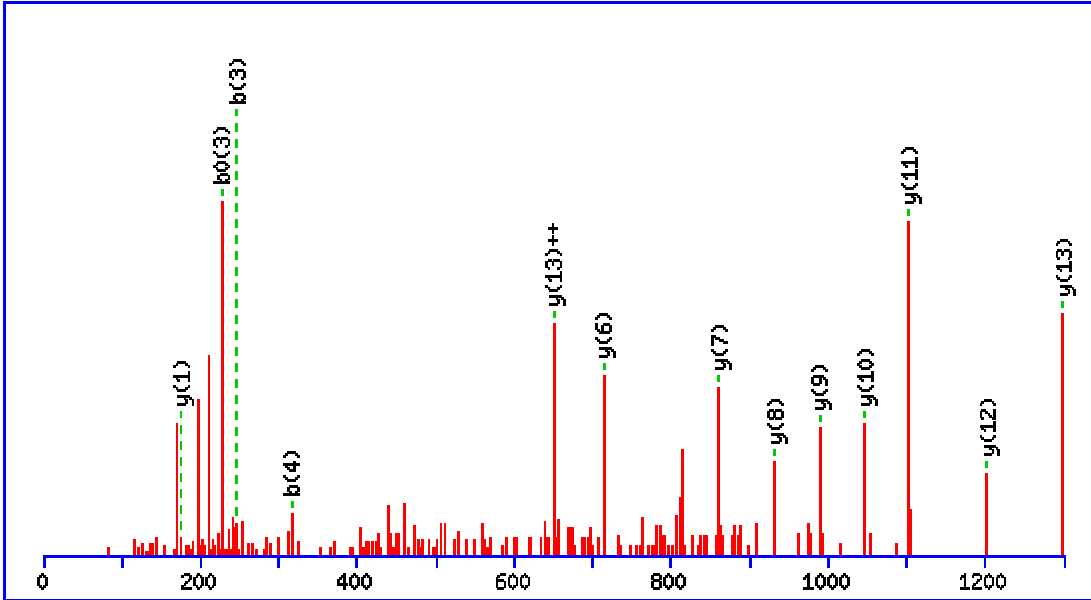

**Monoisotopic mass of neutral peptide Mr(calc):** 1614.8366

**Fixed modifications:** Carbamidomethyl (C)

**Ions Score:** 48 **Expect:** 0.00095

**Matches (Bold Red):** 13/173 fragment ions using 35 most intense peaks

| #  | Immon.   | b               | b <sup>++</sup> | b <sup>0</sup>  | b <sup>0++</sup> | Seq.     | y                | y <sup>++</sup> | y <sup>*</sup> | y <sup>*++</sup> | y <sup>0</sup> | y <sup>0++</sup> | #  |
|----|----------|-----------------|-----------------|-----------------|------------------|----------|------------------|-----------------|----------------|------------------|----------------|------------------|----|
| 1  | 30.0338  | 58.0287         | 29.5180         |                 |                  | <b>G</b> |                  |                 |                |                  |                |                  | 17 |
| 2  | 60.0444  | 145.0608        | 73.0340         | 127.0502        | 64.0287          | <b>S</b> | 1558.8224        | 779.9148        | 1541.7958      | 771.4016         | 1540.8118      | 770.9095         | 16 |
| 3  | 74.0600  | <b>246.1084</b> | 123.5579        | <b>228.0979</b> | 114.5526         | <b>T</b> | 1471.7904        | 736.3988        | 1454.7638      | 727.8855         | 1453.7798      | 727.3935         | 15 |
| 4  | 44.0495  | <b>317.1456</b> | 159.0764        | 299.1350        | 150.0711         | <b>A</b> | 1370.7427        | 685.8750        | 1353.7161      | 677.3617         | 1352.7321      | 676.8697         | 14 |
| 5  | 70.0651  | 414.1983        | 207.6028        | 396.1878        | 198.5975         | <b>P</b> | <b>1299.7056</b> | <b>650.3564</b> | 1282.6790      | 641.8431         | 1281.6950      | 641.3511         | 13 |
| 6  | 72.0808  | 513.2667        | 257.1370        | 495.2562        | 248.1317         | <b>V</b> | <b>1202.6528</b> | 601.8300        | 1185.6263      | 593.3168         | 1184.6422      | 592.8248         | 12 |
| 7  | 30.0338  | 570.2882        | 285.6477        | 552.2776        | 276.6425         | <b>G</b> | <b>1103.5844</b> | 552.2958        | 1086.5578      | 543.7826         | 1085.5738      | 543.2905         | 11 |
| 8  | 30.0338  | 627.3097        | 314.1585        | 609.2991        | 305.1532         | <b>G</b> | <b>1046.5629</b> | 523.7851        | 1029.5364      | 515.2718         | 1028.5524      | 514.7798         | 10 |
| 9  | 30.0338  | 684.3311        | 342.6692        | 666.3206        | 333.6639         | <b>G</b> | <b>989.5415</b>  | 495.2744        | 972.5149       | 486.7611         | 971.5309       | 486.2691         | 9  |
| 10 | 44.0495  | 755.3682        | 378.1878        | 737.3577        | 369.1825         | <b>A</b> | <b>932.5200</b>  | 466.7636        | 915.4934       | 458.2504         | 914.5094       | 457.7584         | 8  |
| 11 | 120.0808 | 902.4367        | 451.7220        | 884.4261        | 442.7167         | <b>F</b> | <b>861.4829</b>  | 431.2451        | 844.4563       | 422.7318         | 843.4723       | 422.2398         | 7  |
| 12 | 70.0651  | 999.4894        | 500.2483        | 981.4789        | 491.2431         | <b>P</b> | <b>714.4145</b>  | 357.7109        | 697.3879       | 349.1976         | 696.4039       | 348.7056         | 6  |
| 13 | 74.0600  | 1100.5371       | 550.7722        | 1082.5265       | 541.7669         | <b>T</b> | 617.3617         | 309.1845        | 600.3352       | 300.6712         | 599.3511       | 300.1792         | 5  |
| 14 | 86.0964  | 1213.6212       | 607.3142        | 1195.6106       | 598.3089         | <b>I</b> | 516.3140         | 258.6606        | 499.2875       | 250.1474         | 498.3035       | 249.6554         | 4  |
| 15 | 72.0808  | 1312.6896       | 656.8484        | 1294.6790       | 647.8431         | <b>V</b> | 403.2300         | 202.1186        | 386.2034       | 193.6053         | 385.2194       | 193.1133         | 3  |
| 16 | 102.0550 | 1441.7322       | 721.3697        | 1423.7216       | 712.3644         | <b>E</b> | 304.1615         | 152.5844        | 287.1350       | 144.0711         | 286.1510       | 143.5791         | 2  |
| 17 | 129.1135 |                 |                 |                 |                  | <b>R</b> | <b>175.1190</b>  | 88.0631         | 158.0924       | 79.5498          |                |                  | 1  |

MS/MS Fragmentation of **DTQSGSLLFIGR**

Found in **P50454**, P50454|SERPH\_HUMAN Serpin H1 OS=Homo sapiens GN=SERPINH1 PE=1 SV=2

Match to Query 508: 1292.619186 from(647.316869,2+)

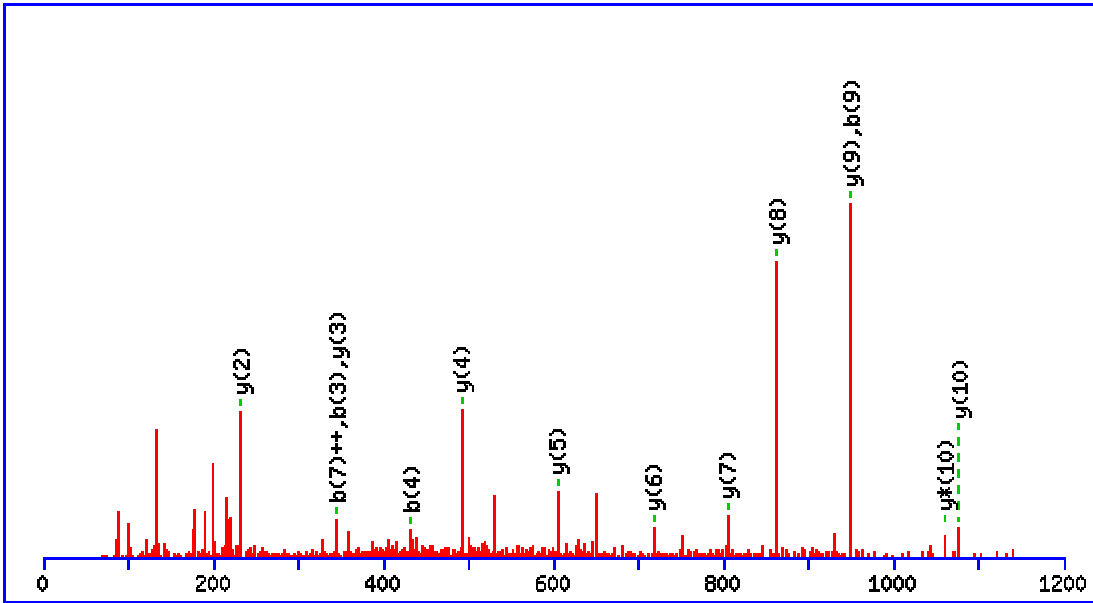

Monoisotopic mass of neutral peptide  $M_r(\text{calc})$ : 1292.6725

Fixed modifications: Carbamidomethyl (C)

Ions Score: 81 Expect: 6e-007

Matches (**Bold Red**): 14/128 fragment ions using 13 most intense peaks

| #  | Immon.   | b               | b <sup>++</sup> | b*        | b <sup>***</sup> | b <sup>0</sup> | b <sup>0++</sup> | Seq. | y                | y <sup>++</sup> | y*               | y <sup>***</sup> | y <sup>0</sup> | y <sup>0++</sup> | #  |
|----|----------|-----------------|-----------------|-----------|------------------|----------------|------------------|------|------------------|-----------------|------------------|------------------|----------------|------------------|----|
| 1  | 88.0393  | 116.0342        | 58.5207         |           |                  | 98.0237        | 49.5155          | D    |                  |                 |                  |                  |                |                  | 12 |
| 2  | 74.0600  | 217.0819        | 109.0446        |           |                  | 199.0713       | 100.0393         | T    | 1178.6528        | 589.8300        | 1161.6262        | 581.3168         | 1160.6422      | 580.8248         | 11 |
| 3  | 101.0709 | <b>345.1405</b> | 173.0739        | 328.1139  | 164.5606         | 327.1299       | 164.0686         | Q    | <b>1077.6051</b> | 539.3062        | <b>1060.5786</b> | 530.7929         | 1059.5946      | 530.3009         | 10 |
| 4  | 60.0444  | <b>432.1725</b> | 216.5899        | 415.1460  | 208.0766         | 414.1619       | 207.5846         | S    | <b>949.5465</b>  | 475.2769        | 932.5200         | 466.7636         | 931.5360       | 466.2716         | 9  |
| 5  | 30.0338  | 489.1940        | 245.1006        | 472.1674  | 236.5873         | 471.1834       | 236.0953         | G    | <b>862.5145</b>  | 431.7609        | 845.4880         | 423.2476         | 844.5039       | 422.7556         | 8  |
| 6  | 60.0444  | 576.2260        | 288.6166        | 559.1994  | 280.1034         | 558.2154       | 279.6114         | S    | <b>805.4930</b>  | 403.2502        | 788.4665         | 394.7369         | 787.4825       | 394.2449         | 7  |
| 7  | 86.0964  | 689.3101        | <b>345.1587</b> | 672.2835  | 336.6454         | 671.2995       | 336.1534         | L    | <b>718.4610</b>  | 359.7341        | 701.4345         | 351.2209         |                |                  | 6  |
| 8  | 86.0964  | 802.3941        | 401.7007        | 785.3676  | 393.1874         | 784.3836       | 392.6954         | L    | <b>605.3770</b>  | 303.1921        | 588.3504         | 294.6788         |                |                  | 5  |
| 9  | 120.0808 | <b>949.4625</b> | 475.2349        | 932.4360  | 466.7216         | 931.4520       | 466.2296         | F    | <b>492.2929</b>  | 246.6501        | 475.2663         | 238.1368         |                |                  | 4  |
| 10 | 86.0964  | 1062.5466       | 531.7769        | 1045.5201 | 523.2637         | 1044.5360      | 522.7717         | I    | <b>345.2245</b>  | 173.1159        | 328.1979         | 164.6026         |                |                  | 3  |
| 11 | 30.0338  | 1119.5681       | 560.2877        | 1102.5415 | 551.7744         | 1101.5575      | 551.2824         | G    | <b>232.1404</b>  | 116.5738        | 215.1139         | 108.0606         |                |                  | 2  |
| 12 | 129.1135 |                 |                 |           |                  |                |                  | R    | 175.1190         | 88.0631         | 158.0924         | 79.5498          |                |                  | 1  |

MS/MS Fragmentation of **VGIPVTDENGNR**

Found in **Q9H9B4**, Q9H9B4|SFXN1\_HUMAN Sideroflexin-1 OS=Homo sapiens GN=SFXN1 PE=1 SV=4

Match to Query 236: 1269.893458 from(635.954005,2+)

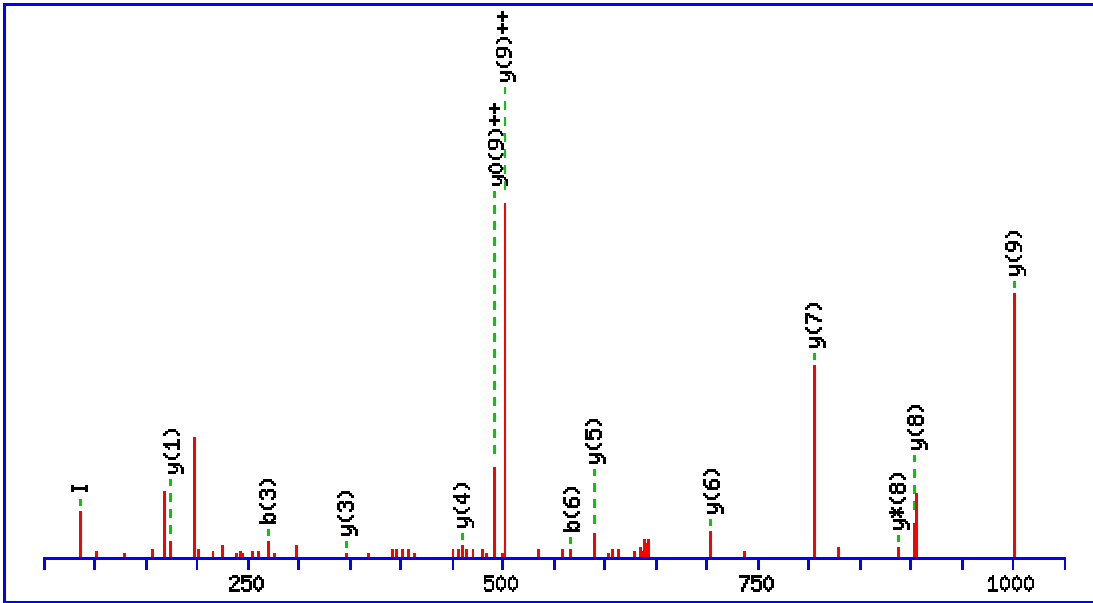

Monoisotopic mass of neutral peptide Mr(calc): 1269.6313

Fixed modifications: Carbamidomethyl (C)

Ions Score: 50 Expect: 0.0006

Matches (Bold Red): 14/110 fragment ions using 37 most intense peaks

| #  | Immon.         | b               | b <sup>++</sup> | b <sup>*</sup> | b <sup>***</sup> | b <sup>0</sup> | b <sup>0++</sup> | Seq. | y                | y <sup>++</sup> | y <sup>*</sup>  | y <sup>***</sup> | y <sup>0</sup> | y <sup>0++</sup> | #  |
|----|----------------|-----------------|-----------------|----------------|------------------|----------------|------------------|------|------------------|-----------------|-----------------|------------------|----------------|------------------|----|
| 1  | 72.0808        | 100.0757        | 50.5415         |                |                  |                |                  | V    |                  |                 |                 |                  |                |                  | 12 |
| 2  | 30.0338        | 157.0972        | 79.0522         |                |                  |                |                  | G    | 1171.5702        | 586.2887        | 1154.5436       | 577.7755         | 1153.5596      | 577.2835         | 11 |
| 3  | <b>86.0964</b> | <b>270.1812</b> | 135.5942        |                |                  |                |                  | I    | 1114.5487        | 557.7780        | 1097.5222       | 549.2647         | 1096.5382      | 548.7727         | 10 |
| 4  | 70.0651        | 367.2340        | 184.1206        |                |                  |                |                  | P    | <b>1001.4647</b> | <b>501.2360</b> | 984.4381        | 492.7227         | 983.4541       | <b>492.2307</b>  | 9  |
| 5  | 72.0808        | 466.3024        | 233.6548        |                |                  |                |                  | V    | <b>904.4119</b>  | 452.7096        | <b>887.3854</b> | 444.1963         | 886.4013       | 443.7043         | 8  |
| 6  | 74.0600        | <b>567.3501</b> | 284.1787        |                |                  | 549.3395       | 275.1734         | T    | <b>805.3435</b>  | 403.1754        | 788.3169        | 394.6621         | 787.3329       | 394.1701         | 7  |
| 7  | 88.0393        | 682.3770        | 341.6921        |                |                  | 664.3665       | 332.6869         | D    | <b>704.2958</b>  | 352.6515        | 687.2693        | 344.1383         | 686.2852       | 343.6463         | 6  |
| 8  | 102.0550       | 811.4196        | 406.2134        |                |                  | 793.4090       | 397.2082         | E    | <b>589.2689</b>  | 295.1381        | 572.2423        | 286.6248         | 571.2583       | 286.1328         | 5  |
| 9  | 87.0553        | 925.4625        | 463.2349        | 908.4360       | 454.7216         | 907.4520       | 454.2296         | N    | <b>460.2263</b>  | 230.6168        | 443.1997        | 222.1035         |                |                  | 4  |
| 10 | 30.0338        | 982.4840        | 491.7456        | 965.4575       | 483.2324         | 964.4734       | 482.7404         | G    | <b>346.1833</b>  | 173.5953        | 329.1568        | 165.0820         |                |                  | 3  |
| 11 | 87.0553        | 1096.5269       | 548.7671        | 1079.5004      | 540.2538         | 1078.5164      | 539.7618         | N    | 289.1619         | 145.0846        | 272.1353        | 136.5713         |                |                  | 2  |
| 12 | 129.1135       |                 |                 |                |                  |                |                  | R    | <b>175.1190</b>  | 88.0631         | 158.0924        | 79.5498          |                |                  | 1  |

MS/MS Fragmentation of **ISQATAQIK**

Found in **Q86Y82**, Q86Y82|STX12\_HUMAN Syntaxin-12 OS=Homo sapiens GN=STX12 PE=1 SV=1

Match to Query 168: 958.652580 from(480.333566,2+)

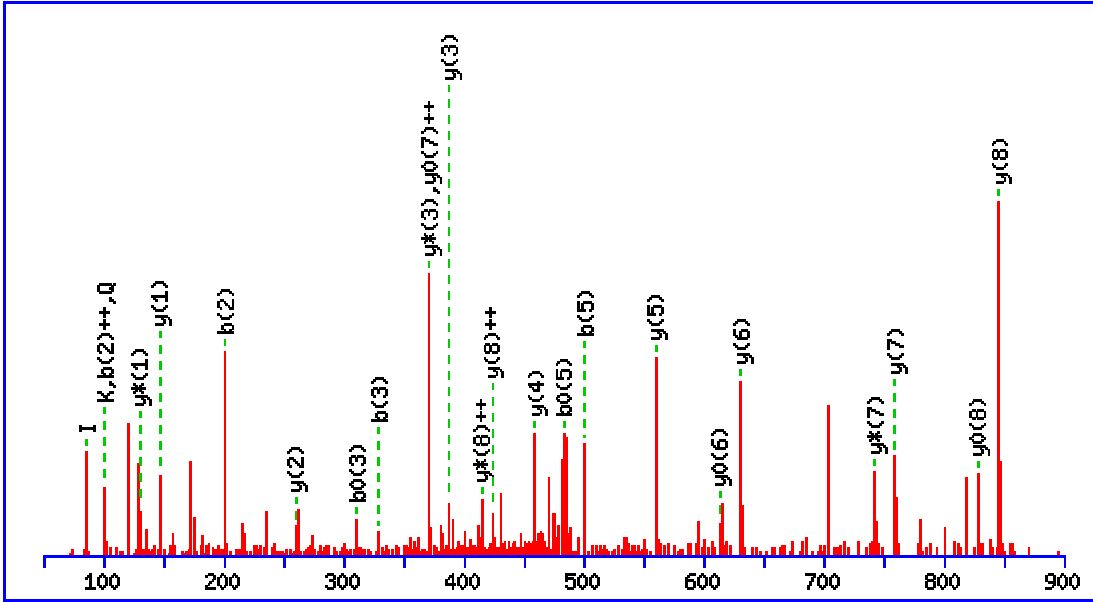

Monoisotopic mass of neutral peptide Mr(calc): 958.5447

Fixed modifications: Carbamidomethyl (C)

Ions Score: 44 Expect: 0.0033

Matches (Bold Red): 27/91 fragment ions using 61 most intense peaks

| # | Immon.          | b               | b <sup>++</sup> | b <sup>*</sup> | b <sup>*++</sup> | b <sup>0</sup>  | b <sup>0++</sup> | Seq. | y               | y <sup>++</sup> | y <sup>*</sup>  | y <sup>*++</sup> | y <sup>0</sup>  | y <sup>0++</sup> | # |
|---|-----------------|-----------------|-----------------|----------------|------------------|-----------------|------------------|------|-----------------|-----------------|-----------------|------------------|-----------------|------------------|---|
| 1 | <b>86.0964</b>  | 114.0913        | 57.5493         |                |                  |                 |                  | I    |                 |                 |                 |                  |                 |                  | 9 |
| 2 | 60.0444         | <b>201.1234</b> | <b>101.0653</b> |                |                  | 183.1128        | 92.0600          | S    | <b>846.4680</b> | <b>423.7376</b> | 829.4414        | <b>415.2243</b>  | <b>828.4574</b> | 414.7323         | 8 |
| 3 | <b>101.0709</b> | <b>329.1819</b> | 165.0946        | 312.1554       | 156.5813         | <b>311.1714</b> | 156.0893         | Q    | <b>759.4359</b> | 380.2216        | <b>742.4094</b> | 371.7083         | 741.4254        | <b>371.2163</b>  | 7 |
| 4 | 44.0495         | 400.2191        | 200.6132        | 383.1925       | 192.0999         | 382.2085        | 191.6079         | A    | <b>631.3774</b> | 316.1923        | 614.3508        | 307.6790         | <b>613.3668</b> | 307.1870         | 6 |
| 5 | 74.0600         | <b>501.2667</b> | 251.1370        | 484.2402       | 242.6237         | <b>483.2562</b> | 242.1317         | T    | <b>560.3402</b> | 280.6738        | 543.3137        | 272.1605         | 542.3297        | 271.6685         | 5 |
| 6 | 44.0495         | 572.3039        | 286.6556        | 555.2773       | 278.1423         | 554.2933        | 277.6503         | A    | <b>459.2926</b> | 230.1499        | 442.2660        | 221.6366         |                 |                  | 4 |
| 7 | <b>101.0709</b> | 700.3624        | 350.6849        | 683.3359       | 342.1716         | 682.3519        | 341.6796         | Q    | <b>388.2554</b> | 194.6314        | <b>371.2289</b> | 186.1181         |                 |                  | 3 |
| 8 | <b>86.0964</b>  | 813.4465        | 407.2269        | 796.4199       | 398.7136         | 795.4359        | 398.2216         | I    | <b>260.1969</b> | 130.6021        | 243.1703        | 122.0888         |                 |                  | 2 |
| 9 | <b>101.1073</b> |                 |                 |                |                  |                 |                  | K    | <b>147.1128</b> | 74.0600         | <b>130.0863</b> | 65.5468          |                 |                  | 1 |

MS/MS Fragmentation of **AYVPIAQVK**

Found in **Q14956**, Q14956|GPNMB\_HUMAN Transmembrane glycoprotein NMB OS=Homo sapiens  
GN=GPNMB PE=1 SV=2

Match to Query 352: 987.591344 from(494.802948,2+)

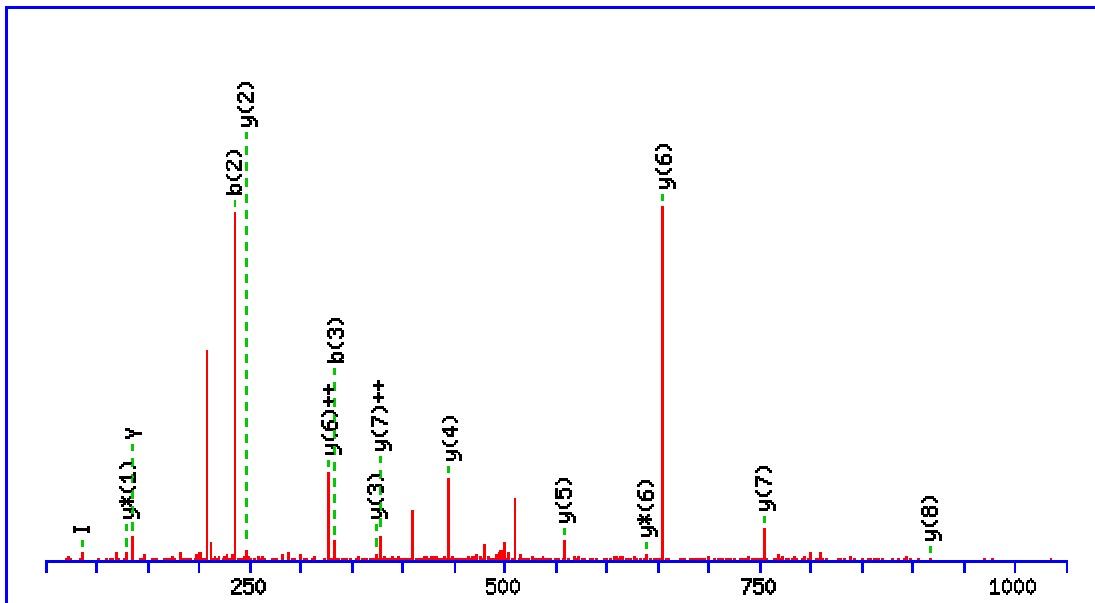

Monoisotopic mass of neutral peptide Mr(calc): 987.5753

Fixed modifications: Carbamidomethyl (C)

Ions Score: 40 Expect: 0.0094

Matches (Bold Red): 15/61 fragment ions using 39 most intense peaks

| # | Immon.          | b               | b <sup>++</sup> | b <sup>*</sup> | b <sup>*++</sup> | Seq. | y               | y <sup>++</sup> | y <sup>*</sup>  | y <sup>*++</sup> | # |
|---|-----------------|-----------------|-----------------|----------------|------------------|------|-----------------|-----------------|-----------------|------------------|---|
| 1 | 44.0495         | 72.0444         | 36.5258         |                |                  | A    |                 |                 |                 |                  | 9 |
| 2 | <b>136.0757</b> | <b>235.1077</b> | 118.0575        |                |                  | Y    | <b>917.5455</b> | 459.2764        | 900.5189        | 450.7631         | 8 |
| 3 | 72.0808         | <b>334.1761</b> | 167.5917        |                |                  | V    | <b>754.4822</b> | <b>377.7447</b> | 737.4556        | 369.2314         | 7 |
| 4 | 70.0651         | 431.2289        | 216.1181        |                |                  | P    | <b>655.4137</b> | <b>328.2105</b> | <b>638.3872</b> | 319.6972         | 6 |
| 5 | <b>86.0964</b>  | 544.3130        | 272.6601        |                |                  | I    | <b>558.3610</b> | 279.6841        | 541.3344        | 271.1709         | 5 |
| 6 | 44.0495         | 615.3501        | 308.1787        |                |                  | A    | <b>445.2769</b> | 223.1421        | 428.2504        | 214.6288         | 4 |
| 7 | 101.0709        | 743.4087        | 372.2080        | 726.3821       | 363.6947         | Q    | <b>374.2398</b> | 187.6235        | 357.2132        | 179.1103         | 3 |
| 8 | 72.0808         | 842.4771        | 421.7422        | 825.4505       | 413.2289         | V    | <b>246.1812</b> | 123.5942        | 229.1547        | 115.0810         | 2 |
| 9 | 101.1073        |                 |                 |                |                  | K    | 147.1128        | 74.0600         | <b>130.0863</b> | 65.5468          | 1 |

MS/MS Fragmentation of **TALVANTSNMPVAAR**

Found in **P38606**, P38606|VATA\_HUMAN Vacuolar ATP synthase catalytic subunit A OS=Homo sapiens  
 GN=ATP6V1A PE=1 SV=2

Match to Query 656: 1530.747990 from(766.381271,2+)

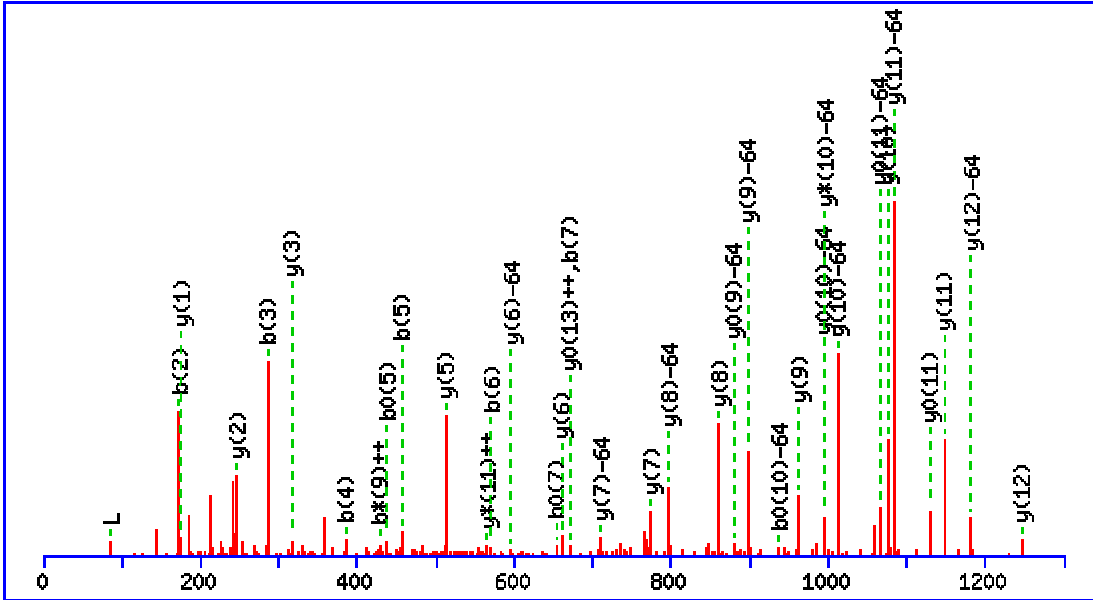

**Monoisotopic mass of neutral peptide Mr(calc):** 1530.7824

**Fixed modifications:** Carbamidomethyl (C)

**Variable modifications:**

**M10** : Oxidation (M), with neutral losses 63.9983(shown in table), 0.0000

**Ions Score:** 86 **Expect:** 1.7e-007

**Matches (Bold Red):** 36/240 fragment ions using 48 most intense peaks

| #  | Immon.         | b               | b <sup>+</sup> | b <sup>*</sup> | b <sup>*+</sup> | b <sup>0</sup>  | b <sup>0+</sup> | Seq. | y                | y <sup>+</sup> | y <sup>*</sup>  | y <sup>*+</sup> | y <sup>0</sup>   | y <sup>0+</sup> | #  |
|----|----------------|-----------------|----------------|----------------|-----------------|-----------------|-----------------|------|------------------|----------------|-----------------|-----------------|------------------|-----------------|----|
| 1  | 74.0600        | 102.0550        | 51.5311        |                |                 | 84.0444         | 42.5258         | T    |                  |                |                 |                 |                  |                 | 15 |
| 2  | 44.0495        | <b>173.0921</b> | 87.0497        |                |                 | 155.0815        | 78.0444         | A    | 1366.7437        | 683.8755       | 1349.7172       | 675.3622        | 1348.7332        | 674.8702        | 14 |
| 3  | <b>86.0964</b> | <b>286.1761</b> | 143.5917       |                |                 | 268.1656        | 134.5864        | L    | 1295.7066        | 648.3570       | 1278.6801       | 639.8437        | 1277.6961        | 639.3517        | 13 |
| 4  | 72.0808        | <b>385.2445</b> | 193.1259       |                |                 | 367.2340        | 184.1206        | V    | <b>1182.6226</b> | 591.8149       | 1165.5960       | 583.3016        | 1164.6120        | 582.8096        | 12 |
| 5  | 44.0495        | <b>456.2817</b> | 228.6445       |                |                 | <b>438.2711</b> | 219.6392        | A    | <b>1083.5542</b> | 542.2807       | 1066.5276       | 533.7674        | <b>1065.5436</b> | 533.2754        | 11 |
| 6  | 87.0553        | <b>570.3246</b> | 285.6659       | 553.2980       | 277.1527        | 552.3140        | 276.6606        | N    | <b>1012.5170</b> | 506.7622       | <b>995.4905</b> | 498.2489        | <b>994.5065</b>  | 497.7569        | 10 |
| 7  | 74.0600        | <b>671.3723</b> | 336.1898       | 654.3457       | 327.6765        | <b>653.3617</b> | 327.1845        | T    | <b>898.4741</b>  | 449.7407       | 881.4476        | 441.2274        | <b>880.4635</b>  | 440.7354        | 9  |
| 8  | 60.0444        | 758.4043        | 379.7058       | 741.3777       | 371.1925        | 740.3937        | 370.7005        | S    | <b>797.4264</b>  | 399.2169       | 780.3999        | 390.7036        | 779.4159         | 390.2116        | 8  |
| 9  | 87.0553        | 872.4472        | 436.7272       | 855.4207       | <b>428.2140</b> | 854.4367        | 427.7220        | N    | <b>710.3944</b>  | 355.7008       | 693.3679        | 347.1876        |                  |                 | 7  |
| 10 | 56.0495        | 955.4843        | 478.2458       | 938.4578       | 469.7325        | <b>937.4738</b> | 469.2405        | M    | <b>596.3515</b>  | 298.6794       | 579.3249        | 290.1661        |                  |                 | 6  |
| 11 | 70.0651        | 1052.5371       | 526.7722       | 1035.5106      | 518.2589        | 1034.5265       | 517.7669        | P    | <b>513.3144</b>  | 257.1608       | 496.2878        | 248.6475        |                  |                 | 5  |
| 12 | 72.0808        | 1151.6055       | 576.3064       | 1134.5790      | 567.7931        | 1133.5950       | 567.3011        | V    | 416.2616         | 208.6344       | 399.2350        | 200.1212        |                  |                 | 4  |
| 13 | 44.0495        | 1222.6426       | 611.8250       | 1205.6161      | 603.3117        | 1204.6321       | 602.8197        | A    | <b>317.1932</b>  | 159.1002       | 300.1666        | 150.5870        |                  |                 | 3  |
| 14 | 44.0495        | 1293.6797       | 647.3435       | 1276.6532      | 638.8302        | 1275.6692       | 638.3382        | A    | <b>246.1561</b>  | 123.5817       | 229.1295        | 115.0684        |                  |                 | 2  |
| 15 | 129.1135       |                 |                |                |                 |                 |                 | R    | <b>175.1190</b>  | 88.0631        | 158.0924        | 79.5498         |                  |                 | 1  |

MS/MS Fragmentation of **VPLALFALNR**

Found in **P12955**, P12955|PEPD\_HUMAN Xaa-Pro dipeptidase OS=Homo sapiens GN=PEPD PE=1 SV=3

Match to Query 376: 1112.655128 from(557.334840,2+)

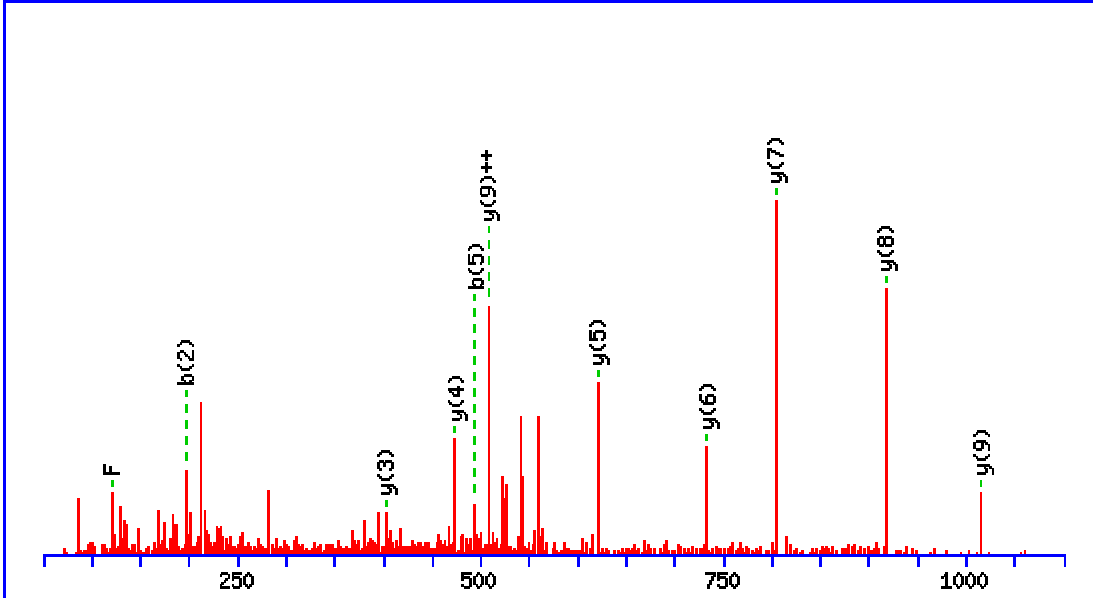

Monoisotopic mass of neutral peptide Mr(calc): 1112.6706

Fixed modifications: Carbamidomethyl (C)

Ions Score: 47 Expect: 0.0015

Matches (Bold Red): 11/66 fragment ions using 13 most intense peaks

| #  | Immon.          | b               | b <sup>++</sup> | b <sup>*</sup> | b <sup>***</sup> | Seq. | y                | y <sup>++</sup> | y <sup>*</sup> | y <sup>***</sup> | #  |
|----|-----------------|-----------------|-----------------|----------------|------------------|------|------------------|-----------------|----------------|------------------|----|
| 1  | 72.0808         | 100.0757        | 50.5415         |                |                  | V    |                  |                 |                |                  | 10 |
| 2  | 70.0651         | <b>197.1285</b> | 99.0679         |                |                  | P    | <b>1014.6095</b> | <b>507.8084</b> | 997.5829       | 499.2951         | 9  |
| 3  | 86.0964         | 310.2125        | 155.6099        |                |                  | L    | <b>917.5567</b>  | 459.2820        | 900.5302       | 450.7687         | 8  |
| 4  | 44.0495         | 381.2496        | 191.1285        |                |                  | A    | <b>804.4726</b>  | 402.7400        | 787.4461       | 394.2267         | 7  |
| 5  | 86.0964         | <b>494.3337</b> | 247.6705        |                |                  | L    | <b>733.4355</b>  | 367.2214        | 716.4090       | 358.7081         | 6  |
| 6  | <b>120.0808</b> | 641.4021        | 321.2047        |                |                  | F    | <b>620.3515</b>  | 310.6794        | 603.3249       | 302.1661         | 5  |
| 7  | 44.0495         | 712.4392        | 356.7233        |                |                  | A    | <b>473.2831</b>  | 237.1452        | 456.2565       | 228.6319         | 4  |
| 8  | 86.0964         | 825.5233        | 413.2653        |                |                  | L    | <b>402.2459</b>  | 201.6266        | 385.2194       | 193.1133         | 3  |
| 9  | 87.0553         | 939.5662        | 470.2867        | 922.5397       | 461.7735         | N    | 289.1619         | 145.0846        | 272.1353       | 136.5713         | 2  |
| 10 | 129.1135        |                 |                 |                |                  | R    | 175.1190         | 88.0631         | 158.0924       | 79.5498          | 1  |



MS/MS Fragmentation of **VAFITGGGTGLGK**

Found in **Q16698**, Q16698|DECR\_HUMAN 2,4-dienoyl-CoA reductase, mitochondrial OS=Homo sapiens  
 GN=DECR1 PE=1 SV=1

Match to Query 278: 1176.669858 from(589.342205,2+)

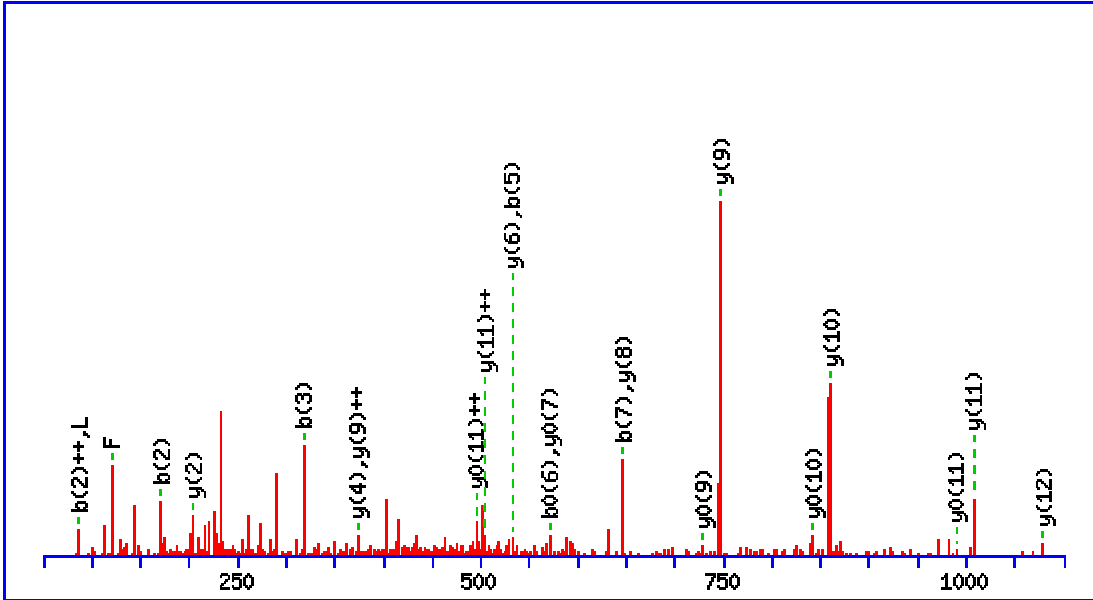

Monoisotopic mass of neutral peptide Mr(calc): 1176.6503

Fixed modifications: Carbamidomethyl (C)

Ions Score: 33 Expect: 0.042

Matches (Bold Red): 24/117 fragment ions using 52 most intense peaks

| #  | Immon.          | b               | b <sup>++</sup> | b <sup>0</sup>  | b <sup>0++</sup> | Seq. | y                | y <sup>++</sup> | y <sup>*</sup> | y <sup>*++</sup> | y <sup>0</sup>  | y <sup>0++</sup> | #  |
|----|-----------------|-----------------|-----------------|-----------------|------------------|------|------------------|-----------------|----------------|------------------|-----------------|------------------|----|
| 1  | 72.0808         | 100.0757        | 50.5415         |                 |                  | V    |                  |                 |                |                  |                 |                  | 13 |
| 2  | 44.0495         | <b>171.1128</b> | <b>86.0600</b>  |                 |                  | A    | <b>1078.5891</b> | 539.7982        | 1061.5626      | 531.2849         | 1060.5786       | 530.7929         | 12 |
| 3  | <b>120.0808</b> | <b>318.1812</b> | 159.5942        |                 |                  | F    | <b>1007.5520</b> | <b>504.2797</b> | 990.5255       | 495.7664         | <b>989.5415</b> | <b>495.2744</b>  | 11 |
| 4  | <b>86.0964</b>  | 431.2653        | 216.1363        |                 |                  | I    | <b>860.4836</b>  | 430.7454        | 843.4571       | 422.2322         | <b>842.4730</b> | 421.7402         | 10 |
| 5  | 74.0600         | <b>532.3130</b> | 266.6601        | 514.3024        | 257.6548         | T    | <b>747.3995</b>  | <b>374.2034</b> | 730.3730       | 365.6901         | <b>729.3890</b> | 365.1981         | 9  |
| 6  | 30.0338         | 589.3344        | 295.1709        | <b>571.3239</b> | 286.1656         | G    | <b>646.3519</b>  | 323.6796        | 629.3253       | 315.1663         | 628.3413        | 314.6743         | 8  |
| 7  | 30.0338         | <b>646.3559</b> | 323.6816        | 628.3453        | 314.6763         | G    | 589.3304         | 295.1688        | 572.3039       | 286.6556         | <b>571.3198</b> | 286.1636         | 7  |
| 8  | 30.0338         | 703.3774        | 352.1923        | 685.3668        | 343.1870         | G    | <b>532.3089</b>  | 266.6581        | 515.2824       | 258.1448         | 514.2984        | 257.6528         | 6  |
| 9  | 74.0600         | 804.4250        | 402.7162        | 786.4145        | 393.7109         | T    | 475.2875         | 238.1474        | 458.2609       | 229.6341         | 457.2769        | 229.1421         | 5  |
| 10 | 30.0338         | 861.4465        | 431.2269        | 843.4359        | 422.2216         | G    | <b>374.2398</b>  | 187.6235        | 357.2132       | 179.1103         |                 |                  | 4  |
| 11 | <b>86.0964</b>  | 974.5306        | 487.7689        | 956.5200        | 478.7636         | L    | 317.2183         | 159.1128        | 300.1918       | 150.5995         |                 |                  | 3  |
| 12 | 30.0338         | 1031.5520       | 516.2797        | 1013.5415       | 507.2744         | G    | <b>204.1343</b>  | 102.5708        | 187.1077       | 94.0575          |                 |                  | 2  |
| 13 | 101.1073        |                 |                 |                 |                  | K    | 147.1128         | 74.0600         | 130.0863       | 65.5468          |                 |                  | 1  |

MS/MS Fragmentation of **GGIVGMTLPIAR**

Found in **Q99714**, Q99714|HCD2\_HUMAN 3-hydroxyacyl-CoA dehydrogenase type-2 OS=Homo sapiens  
 GN=HSD17B10 PE=1 SV=3

Match to Query 474: 1199.667192 from(600.840872,2+)

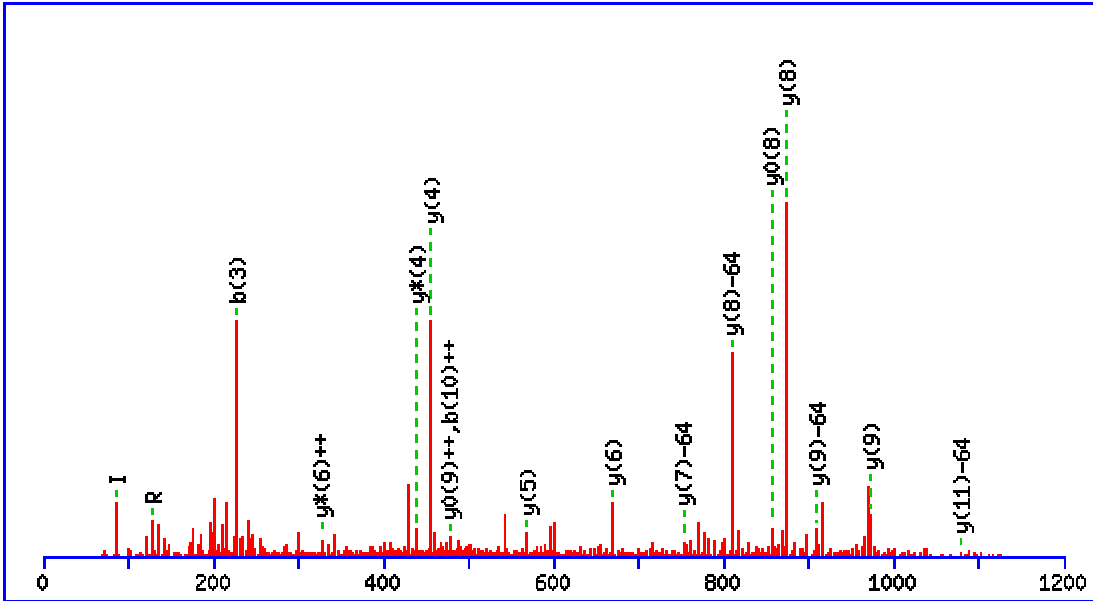

Monoisotopic mass of neutral peptide Mr(calc): 1199.6696

Fixed modifications: Carbamidomethyl (C)

Variable modifications:

M6 : Oxidation (M), with neutral losses 63.9983(shown in table), 0.0000

Ions Score: 37 Expect: 0.014

Matches (**Bold Red**): 20/153 fragment ions using 47 most intense peaks

| #  | Immon.          | b               | b <sup>++</sup> | b <sup>0</sup> | b <sup>0++</sup> | Seq. | y                | y <sup>++</sup> | y <sup>*</sup>  | y <sup>*++</sup> | y <sup>0</sup> | y <sup>0++</sup> | #  |
|----|-----------------|-----------------|-----------------|----------------|------------------|------|------------------|-----------------|-----------------|------------------|----------------|------------------|----|
| 1  | 30.0338         | 58.0287         | 29.5180         |                |                  | G    |                  |                 |                 |                  |                |                  | 12 |
| 2  | 30.0338         | 115.0502        | 58.0287         |                |                  | G    | <b>1079.6572</b> | 540.3322        | 1062.6306       | 531.8189         | 1061.6466      | 531.3269         | 11 |
| 3  | <b>86.0964</b>  | <b>228.1343</b> | 114.5708        |                |                  | I    | 1022.6357        | 511.8215        | 1005.6091       | 503.3082         | 1004.6251      | 502.8162         | 10 |
| 4  | 72.0808         | <b>327.2027</b> | 164.1050        |                |                  | V    | <b>909.5516</b>  | 455.2795        | 892.5251        | 446.7662         | 891.5411       | 446.2742         | 9  |
| 5  | 30.0338         | 384.2241        | 192.6157        |                |                  | G    | <b>810.4832</b>  | 405.7452        | 793.4567        | 397.2320         | 792.4727       | 396.7400         | 8  |
| 6  | 56.0495         | 467.2613        | 234.1343        |                |                  | M    | <b>753.4618</b>  | 377.2345        | 736.4352        | 368.7212         | 735.4512       | 368.2292         | 7  |
| 7  | 74.0600         | 568.3089        | 284.6581        | 550.2984       | 275.6528         | T    | <b>670.4246</b>  | 335.7160        | 653.3981        | <b>327.2027</b>  | 652.4141       | 326.7107         | 6  |
| 8  | <b>86.0964</b>  | 681.3930        | 341.2001        | 663.3824       | 332.1949         | L    | <b>569.3770</b>  | 285.1921        | 552.3504        | 276.6788         |                |                  | 5  |
| 9  | 70.0651         | 778.4458        | 389.7265        | 760.4352       | 380.7212         | P    | <b>456.2929</b>  | 228.6501        | <b>439.2663</b> | 220.1368         |                |                  | 4  |
| 10 | <b>86.0964</b>  | 891.5298        | 446.2686        | 873.5193       | 437.2633         | I    | 359.2401         | 180.1237        | 342.2136        | 171.6104         |                |                  | 3  |
| 11 | 44.0495         | 962.5669        | 481.7871        | 944.5564       | 472.7818         | A    | 246.1561         | 123.5817        | 229.1295        | 115.0684         |                |                  | 2  |
| 12 | <b>129.1135</b> |                 |                 |                |                  | R    | 175.1190         | 88.0631         | 158.0924        | 79.5498          |                |                  | 1  |

MS/MS Fragmentation of **LITPAVVSER**

Found in **P62851**, P62851|RS25\_HUMAN 40S ribosomal protein S25 OS=Homo sapiens GN=RPS25 PE=1 SV=1

Match to Query 332: 1083.652664 from(542.833608,2+)

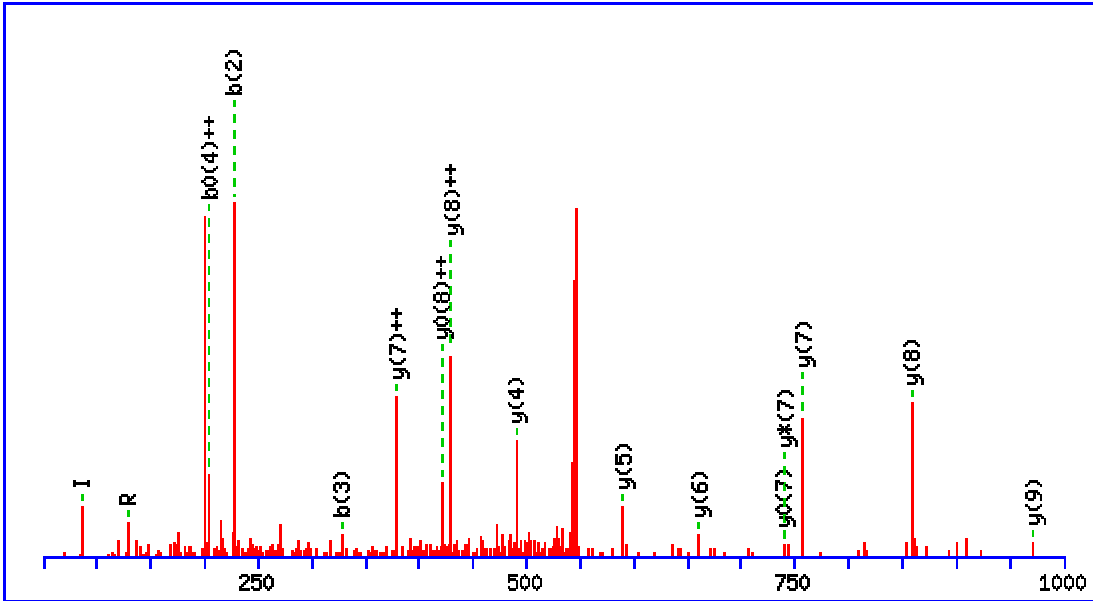

**Monoisotopic mass of neutral peptide Mr(calc):** 1083.6288

**Fixed modifications:** Carbamidomethyl (C)

**Ions Score:** 36 **Expect:** 0.018

**Matches (Bold Red):** 17/94 fragment ions using 29 most intense peaks

| #  | Immon.          | b               | b <sup>++</sup> | b <sup>0</sup> | b <sup>0++</sup> | Seq. | y               | y <sup>++</sup> | y <sup>*</sup>  | y <sup>*++</sup> | y <sup>0</sup>  | y <sup>0++</sup> | #  |
|----|-----------------|-----------------|-----------------|----------------|------------------|------|-----------------|-----------------|-----------------|------------------|-----------------|------------------|----|
| 1  | <b>86.0964</b>  | 114.0913        | 57.5493         |                |                  | L    |                 |                 |                 |                  |                 |                  | 10 |
| 2  | <b>86.0964</b>  | <b>227.1754</b> | 114.0913        |                |                  | I    | <b>971.5520</b> | 486.2796        | 954.5255        | 477.7664         | 953.5415        | 477.2744         | 9  |
| 3  | 74.0600         | <b>328.2231</b> | 164.6152        | 310.2125       | 155.6099         | T    | <b>858.4680</b> | <b>429.7376</b> | 841.4414        | 421.2243         | 840.4574        | <b>420.7323</b>  | 8  |
| 4  | 70.0651         | 425.2758        | 213.1416        | 407.2653       | <b>204.1363</b>  | P    | <b>757.4203</b> | <b>379.2138</b> | <b>740.3937</b> | 370.7005         | <b>739.4097</b> | 370.2085         | 7  |
| 5  | 44.0495         | 496.3130        | 248.6601        | 478.3024       | 239.6548         | A    | <b>660.3675</b> | 330.6874        | 643.3410        | 322.1741         | 642.3569        | 321.6821         | 6  |
| 6  | 72.0808         | 595.3814        | 298.1943        | 577.3708       | 289.1890         | V    | <b>589.3304</b> | 295.1688        | 572.3039        | 286.6556         | 571.3198        | 286.1636         | 5  |
| 7  | 72.0808         | 694.4498        | 347.7285        | 676.4392       | 338.7232         | V    | <b>490.2620</b> | 245.6346        | 473.2354        | 237.1214         | 472.2514        | 236.6293         | 4  |
| 8  | 60.0444         | 781.4818        | 391.2445        | 763.4713       | 382.2393         | S    | 391.1936        | 196.1004        | 374.1670        | 187.5872         | 373.1830        | 187.0951         | 3  |
| 9  | 102.0550        | 910.5244        | 455.7658        | 892.5138       | 446.7606         | E    | 304.1615        | 152.5844        | 287.1350        | 144.0711         | 286.1510        | 143.5791         | 2  |
| 10 | <b>129.1135</b> |                 |                 |                |                  | R    | 175.1190        | 88.0631         | 158.0924        | 79.5498          |                 |                  | 1  |

MS/MS Fragmentation of **LSNIFVIGK**

Found in **P62701**, P62701|RS4X\_HUMAN 40S ribosomal protein S4, X isoform OS=Homo sapiens  
GN=RPS4X PE=1 SV=2

Match to Query 328: 989.563282 from(495.788917,2+)

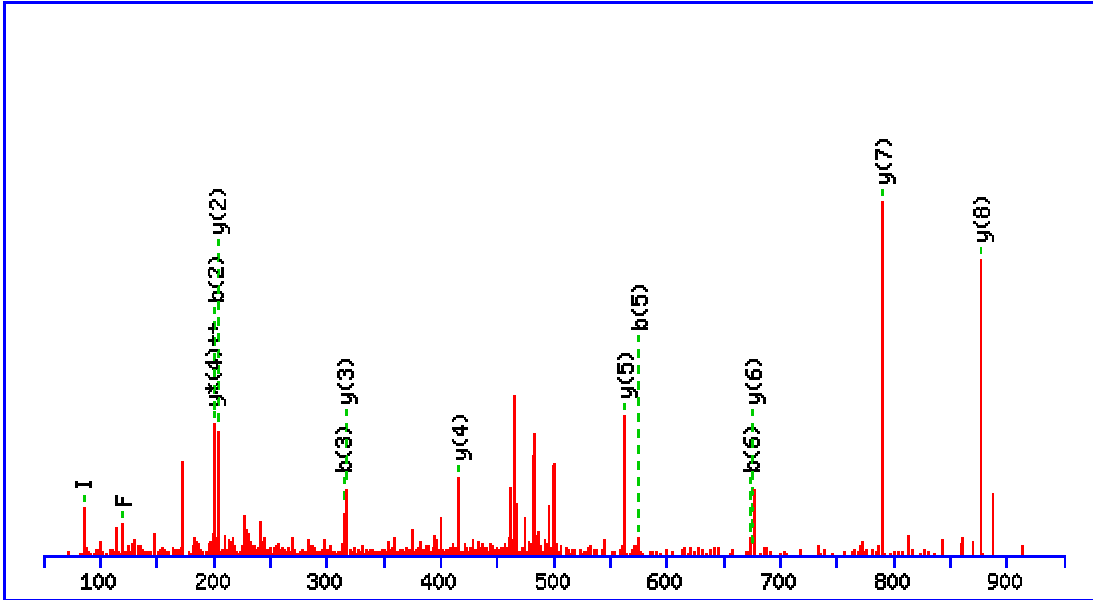

Monoisotopic mass of neutral peptide  $M_r(\text{calc})$ : 989.5910

Fixed modifications: Carbamidomethyl (C)

Ions Score: 61 Expect: 7.4e-005

Matches (**Bold Red**): 16/85 fragment ions using 21 most intense peaks

| # | Immon.          | b               | b <sup>++</sup> | b*       | b <sup>*++</sup> | b <sup>0</sup> | b <sup>0++</sup> | Seq. | y               | y <sup>++</sup> | y*       | y <sup>*++</sup> | y <sup>0</sup> | y <sup>0++</sup> | # |
|---|-----------------|-----------------|-----------------|----------|------------------|----------------|------------------|------|-----------------|-----------------|----------|------------------|----------------|------------------|---|
| 1 | <b>86.0964</b>  | 114.0913        | 57.5493         |          |                  |                |                  | L    |                 |                 |          |                  |                |                  | 9 |
| 2 | 60.0444         | <b>201.1234</b> | 101.0653        |          |                  | 183.1128       | 92.0600          | S    | <b>877.5142</b> | 439.2607        | 860.4876 | 430.7475         | 859.5036       | 430.2554         | 8 |
| 3 | 87.0553         | <b>315.1663</b> | 158.0868        | 298.1397 | 149.5735         | 297.1557       | 149.0815         | N    | <b>790.4822</b> | 395.7447        | 773.4556 | 387.2314         |                |                  | 7 |
| 4 | <b>86.0964</b>  | 428.2504        | 214.6288        | 411.2238 | 206.1155         | 410.2398       | 205.6235         | I    | <b>676.4392</b> | 338.7233        | 659.4127 | 330.2100         |                |                  | 6 |
| 5 | <b>120.0808</b> | <b>575.3188</b> | 288.1630        | 558.2922 | 279.6498         | 557.3082       | 279.1577         | F    | <b>563.3552</b> | 282.1812        | 546.3286 | 273.6679         |                |                  | 5 |
| 6 | 72.0808         | <b>674.3872</b> | 337.6972        | 657.3606 | 329.1840         | 656.3766       | 328.6919         | V    | <b>416.2867</b> | 208.6470        | 399.2602 | <b>200.1337</b>  |                |                  | 4 |
| 7 | <b>86.0964</b>  | 787.4713        | 394.2393        | 770.4447 | 385.7260         | 769.4607       | 385.2340         | I    | <b>317.2183</b> | 159.1128        | 300.1918 | 150.5995         |                |                  | 3 |
| 8 | 30.0338         | 844.4927        | 422.7500        | 827.4662 | 414.2367         | 826.4822       | 413.7447         | G    | <b>204.1343</b> | 102.5708        | 187.1077 | 94.0575          |                |                  | 2 |
| 9 | 101.1073        |                 |                 |          |                  |                |                  | K    | 147.1128        | 74.0600         | 130.0863 | 65.5468          |                |                  | 1 |

MS/MS Fragmentation of **TSFFQALGITTK**

Found in **P05388**, P05388|RLA0\_HUMAN 60S acidic ribosomal protein P0 OS=Homo sapiens GN=RPLP0 PE=1 SV=1

Match to Query 529: 1312.704818 from(657.359685,2+)

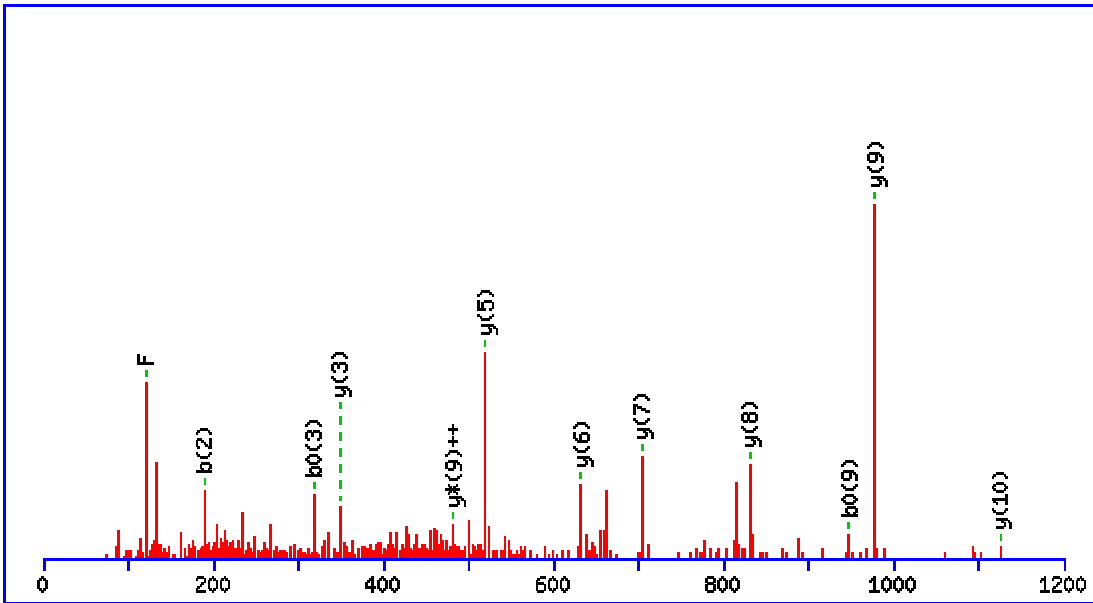

Monoisotopic mass of neutral peptide  $M_r(\text{calc})$ : 1312.7027

Fixed modifications: Carbamidomethyl (C)

Ions Score: 43 Expect: 0.0035

Matches (**Bold Red**): 13/134 fragment ions using 15 most intense peaks

| #  | Immon.          | b               | b <sup>++</sup> | b <sup>*</sup> | b <sup>*++</sup> | b <sup>0</sup>  | b <sup>0++</sup> | Seq. | y                | y <sup>++</sup> | y <sup>*</sup> | y <sup>*++</sup> | y <sup>0</sup> | y <sup>0++</sup> | #  |
|----|-----------------|-----------------|-----------------|----------------|------------------|-----------------|------------------|------|------------------|-----------------|----------------|------------------|----------------|------------------|----|
| 1  | 74.0600         | 102.0550        | 51.5311         |                |                  | 84.0444         | 42.5258          | T    |                  |                 |                |                  |                |                  | 12 |
| 2  | 60.0444         | <b>189.0870</b> | 95.0471         |                |                  | 171.0764        | 86.0418          | S    | 1212.6623        | 606.8348        | 1195.6358      | 598.3215         | 1194.6517      | 597.8295         | 11 |
| 3  | <b>120.0808</b> | 336.1554        | 168.5813        |                |                  | <b>318.1448</b> | 159.5761         | F    | <b>1125.6303</b> | 563.3188        | 1108.6037      | 554.8055         | 1107.6197      | 554.3135         | 10 |
| 4  | <b>120.0808</b> | 483.2238        | 242.1155        |                |                  | 465.2132        | 233.1103         | F    | <b>978.5619</b>  | 489.7846        | 961.5353       | <b>481.2713</b>  | 960.5513       | 480.7793         | 9  |
| 5  | 101.0709        | 611.2824        | 306.1448        | 594.2558       | 297.6316         | 593.2718        | 297.1395         | Q    | <b>831.4934</b>  | 416.2504        | 814.4669       | 407.7371         | 813.4829       | 407.2451         | 8  |
| 6  | 44.0495         | 682.3195        | 341.6634        | 665.2930       | 333.1501         | 664.3089        | 332.6581         | A    | <b>703.4349</b>  | 352.2211        | 686.4083       | 343.7078         | 685.4243       | 343.2158         | 7  |
| 7  | 86.0964         | 795.4036        | 398.2054        | 778.3770       | 389.6921         | 777.3930        | 389.2001         | L    | <b>632.3978</b>  | 316.7025        | 615.3712       | 308.1892         | 614.3872       | 307.6972         | 6  |
| 8  | 30.0338         | 852.4250        | 426.7162        | 835.3985       | 418.2029         | 834.4145        | 417.7109         | G    | <b>519.3137</b>  | 260.1605        | 502.2871       | 251.6472         | 501.3031       | 251.1552         | 5  |
| 9  | 86.0964         | 965.5091        | 483.2582        | 948.4825       | 474.7449         | <b>947.4985</b> | 474.2529         | I    | 462.2922         | 231.6498        | 445.2657       | 223.1365         | 444.2817       | 222.6445         | 4  |
| 10 | 74.0600         | 1066.5568       | 533.7820        | 1049.5302      | 525.2688         | 1048.5462       | 524.7767         | T    | <b>349.2082</b>  | 175.1077        | 332.1816       | 166.5944         | 331.1976       | 166.1024         | 3  |
| 11 | 74.0600         | 1167.6045       | 584.3059        | 1150.5779      | 575.7926         | 1149.5939       | 575.3006         | T    | 248.1605         | 124.5839        | 231.1339       | 116.0706         | 230.1499       | 115.5786         | 2  |
| 12 | 101.1073        |                 |                 |                |                  |                 |                  | K    | 147.1128         | 74.0600         | 130.0863       | 65.5468          |                |                  | 1  |

MS/MS Fragmentation of **ELAEDDSILK**

Found in **P56385**, P56385|ATP5I\_HUMAN ATP synthase subunit e, mitochondrial OS=Homo sapiens  
 GN=ATP5I PE=2 SV=2

Match to Query 267: 1131.487464 from(566.751008,2+)

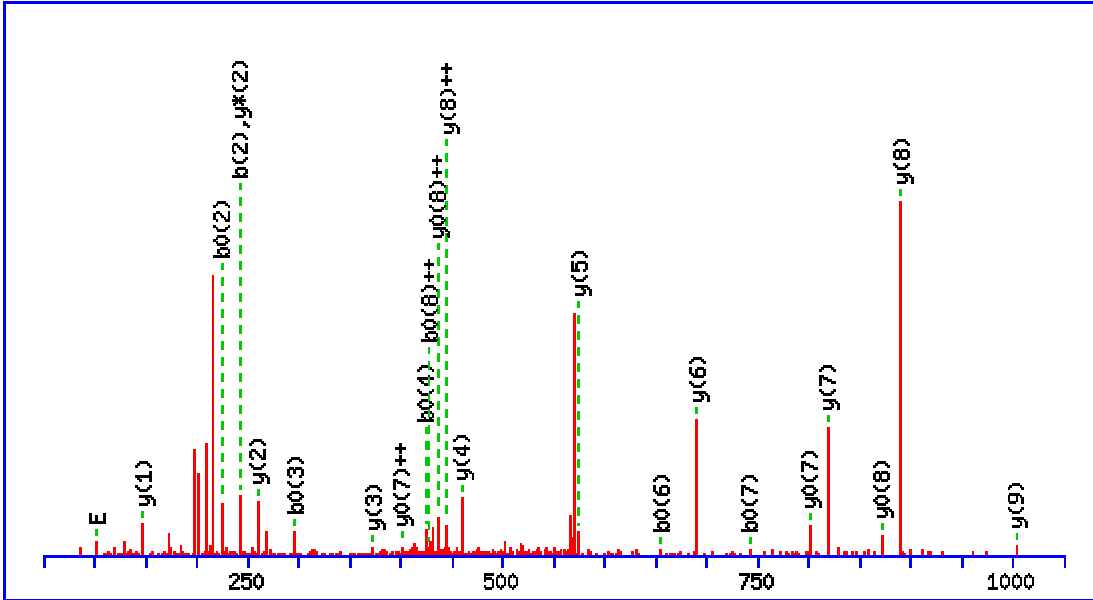

Monoisotopic mass of neutral peptide Mr(calc): 1131.5659

Fixed modifications: Carbamidomethyl (C)

Ions Score: 47 Expect: 0.0015

Matches (**Bold Red**): 24/94 fragment ions using 41 most intense peaks

| #  | Immon.          | b               | b <sup>++</sup> | b <sup>0</sup>  | b <sup>0++</sup> | Seq. | y                | y <sup>++</sup> | y <sup>*</sup>  | y <sup>*++</sup> | y <sup>0</sup>  | y <sup>0++</sup> | #  |
|----|-----------------|-----------------|-----------------|-----------------|------------------|------|------------------|-----------------|-----------------|------------------|-----------------|------------------|----|
| 1  | <b>102.0550</b> | 130.0499        | 65.5286         | 112.0393        | 56.5233          | E    |                  |                 |                 |                  |                 |                  | 10 |
| 2  | 86.0964         | <b>243.1339</b> | 122.0706        | <b>225.1234</b> | 113.0653         | L    | <b>1003.5306</b> | 502.2689        | 986.5041        | 493.7557         | 985.5201        | 493.2637         | 9  |
| 3  | 44.0495         | 314.1710        | 157.5892        | <b>296.1605</b> | 148.5839         | A    | <b>890.4466</b>  | <b>445.7269</b> | 873.4200        | 437.2136         | <b>872.4360</b> | <b>436.7216</b>  | 8  |
| 4  | <b>102.0550</b> | 443.2136        | 222.1105        | <b>425.2031</b> | 213.1052         | E    | <b>819.4094</b>  | 410.2084        | 802.3829        | 401.6951         | <b>801.3989</b> | <b>401.2031</b>  | 7  |
| 5  | 88.0393         | 558.2406        | 279.6239        | 540.2300        | 270.6186         | D    | <b>690.3668</b>  | 345.6871        | 673.3403        | 337.1738         | 672.3563        | 336.6818         | 6  |
| 6  | 88.0393         | 673.2675        | 337.1374        | <b>655.2570</b> | 328.1321         | D    | <b>575.3399</b>  | 288.1736        | 558.3134        | 279.6603         | 557.3293        | 279.1683         | 5  |
| 7  | 60.0444         | 760.2996        | 380.6534        | <b>742.2890</b> | 371.6481         | S    | <b>460.3130</b>  | 230.6601        | 443.2864        | 222.1468         | 442.3024        | 221.6548         | 4  |
| 8  | 86.0964         | 873.3836        | 437.1954        | 855.3731        | <b>428.1902</b>  | I    | <b>373.2809</b>  | 187.1441        | 356.2544        | 178.6308         |                 |                  | 3  |
| 9  | 86.0964         | 986.4677        | 493.7375        | 968.4571        | 484.7322         | L    | <b>260.1969</b>  | 130.6021        | <b>243.1703</b> | 122.0888         |                 |                  | 2  |
| 10 | 101.1073        |                 |                 |                 |                  | K    | <b>147.1128</b>  | 74.0600         | 130.0863        | 65.5468          |                 |                  | 1  |

MS/MS Fragmentation of **NMINTFVPSGK**

Found in **Q13510**, Q13510|ASAH1\_HUMAN Acid ceramidase OS=Homo sapiens GN=ASAH1 PE=1 SV=4

Match to Query 208: 1222.385308 from(612.199930,2+)

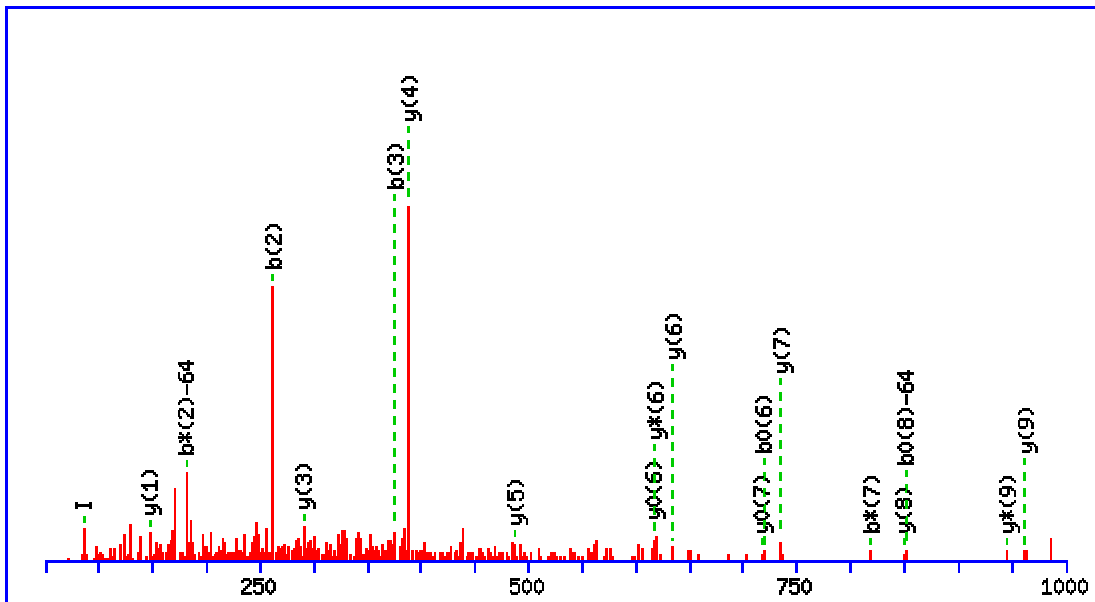

Monoisotopic mass of neutral peptide Mr(calc): 1222.6016

Fixed modifications: Carbamidomethyl (C)

Variable modifications:

M2 : Oxidation (M), with neutral losses 0.0000(shown in table), 63.9983

Ions Score: 40 Expect: 0.0064

Matches (Bold Red): 19/174 fragment ions using 46 most intense peaks

| #  | Immon.         | b               | b <sup>++</sup> | b <sup>*</sup>  | b <sup>*++</sup> | b <sup>0</sup>  | b <sup>0++</sup> | Seq. | y               | y <sup>++</sup> | y <sup>*</sup>  | y <sup>*++</sup> | y <sup>0</sup>  | y <sup>0++</sup> | #  |
|----|----------------|-----------------|-----------------|-----------------|------------------|-----------------|------------------|------|-----------------|-----------------|-----------------|------------------|-----------------|------------------|----|
| 1  | 87.0553        | 115.0502        | 58.0287         | 98.0237         | 49.5155          |                 |                  | N    |                 |                 |                 |                  |                 |                  | 11 |
| 2  | 120.0478       | <b>262.0856</b> | 131.5464        | 245.0591        | 123.0332         |                 |                  | M    | 1109.5660       | 555.2866        | 1092.5394       | 546.7733         | 1091.5554       | 546.2813         | 10 |
| 3  | <b>86.0964</b> | <b>375.1697</b> | 188.0885        | 358.1431        | 179.5752         |                 |                  | I    | <b>962.5306</b> | 481.7689        | <b>945.5040</b> | 473.2556         | 944.5200        | 472.7636         | 9  |
| 4  | 87.0553        | 489.2126        | 245.1099        | 472.1860        | 236.5967         |                 |                  | N    | <b>849.4465</b> | 425.2269        | 832.4199        | 416.7136         | 831.4359        | 416.2216         | 8  |
| 5  | 74.0600        | 590.2603        | 295.6338        | 573.2337        | 287.1205         | 572.2497        | 286.6285         | T    | <b>735.4036</b> | 368.2054        | 718.3770        | 359.6921         | <b>717.3930</b> | 359.2001         | 7  |
| 6  | 120.0808       | 737.3287        | 369.1680        | 720.3021        | 360.6547         | <b>719.3181</b> | 360.1627         | F    | <b>634.3559</b> | 317.6816        | <b>617.3293</b> | 309.1683         | <b>616.3453</b> | 308.6763         | 6  |
| 7  | 72.0808        | 836.3971        | 418.7022        | <b>819.3706</b> | 410.1889         | 818.3865        | 409.6969         | V    | <b>487.2875</b> | 244.1474        | 470.2609        | 235.6341         | 469.2769        | 235.1421         | 5  |
| 8  | 70.0651        | 933.4499        | 467.2286        | 916.4233        | 458.7153         | 915.4393        | 458.2233         | P    | <b>388.2191</b> | 194.6132        | 371.1925        | 186.0999         | 370.2085        | 185.6079         | 4  |
| 9  | 60.0444        | 1020.4819       | 510.7446        | 1003.4553       | 502.2313         | 1002.4713       | 501.7393         | S    | <b>291.1663</b> | 146.0868        | 274.1397        | 137.5735         | 273.1557        | 137.0815         | 3  |
| 10 | 30.0338        | 1077.5034       | 539.2553        | 1060.4768       | 530.7420         | 1059.4928       | 530.2500         | G    | 204.1343        | 102.5708        | 187.1077        | 94.0575          |                 |                  | 2  |
| 11 | 101.1073       |                 |                 |                 |                  |                 |                  | K    | <b>147.1128</b> | 74.0600         | 130.0863        | 65.5468          |                 |                  | 1  |

MS/MS Fragmentation of **FQTEIQTVNK**

Found in **P14868**, P14868|SYDC\_HUMAN Aspartyl-tRNA synthetase, cytoplasmic OS=Homo sapiens  
 GN=DARS PE=1 SV=2

Match to Query 308: 1206.60008 from(604.307280,2+)

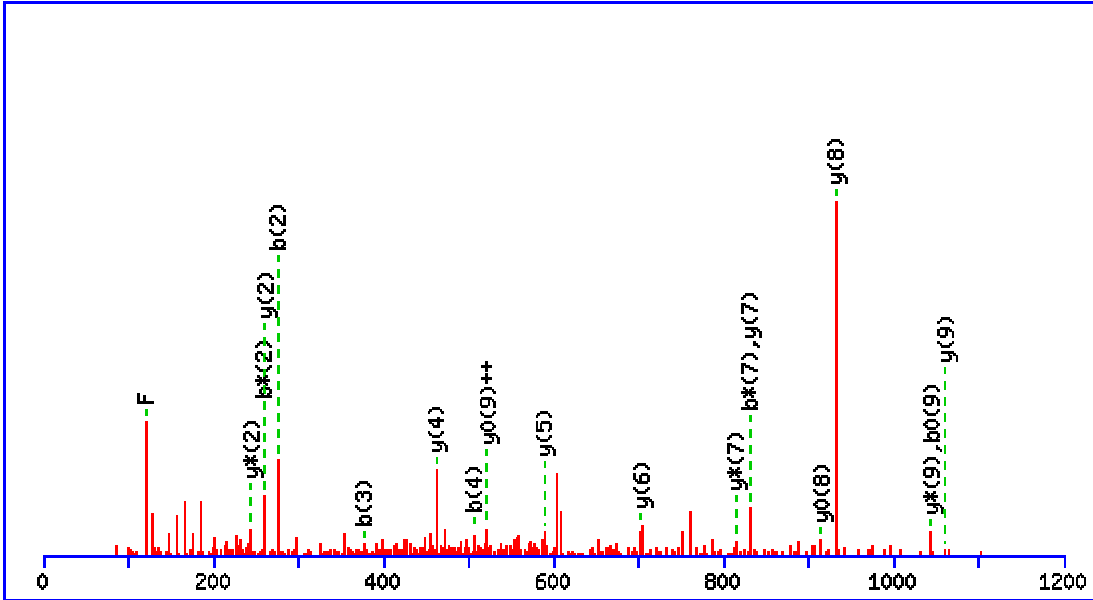

Monoisotopic mass of neutral peptide Mr(calc): 1206.6245

Fixed modifications: Carbamidomethyl (C)

Ions Score: 33 Expect: 0.035

Matches (Bold Red): 19/106 fragment ions using 47 most intense peaks

| #  | Immon.          | b               | b <sup>++</sup> | b <sup>*</sup>  | b <sup>*++</sup> | b <sup>0</sup>   | b <sup>0++</sup> | Seq.     | y                | y <sup>++</sup> | y <sup>*</sup>   | y <sup>*++</sup> | y <sup>0</sup>  | y <sup>0++</sup> | #         |
|----|-----------------|-----------------|-----------------|-----------------|------------------|------------------|------------------|----------|------------------|-----------------|------------------|------------------|-----------------|------------------|-----------|
| 1  | <b>120.0808</b> | 148.0757        | 74.5415         |                 |                  |                  |                  | <b>F</b> |                  |                 |                  |                  |                 |                  | <b>10</b> |
| 2  | 101.0709        | <b>276.1343</b> | 138.5708        | <b>259.1077</b> | 130.0575         |                  |                  | <b>Q</b> | <b>1060.5633</b> | 530.7853        | <b>1043.5368</b> | 522.2720         | 1042.5528       | <b>521.7800</b>  | <b>9</b>  |
| 3  | 74.0600         | <b>377.1819</b> | 189.0946        | 360.1554        | 180.5813         | 359.1714         | 180.0893         | <b>T</b> | <b>932.5047</b>  | 466.7560        | 915.4782         | 458.2427         | <b>914.4942</b> | 457.7507         | <b>8</b>  |
| 4  | 102.0550        | <b>506.2245</b> | 253.6159        | 489.1980        | 245.1026         | 488.2140         | 244.6106         | <b>E</b> | <b>831.4571</b>  | 416.2322        | <b>814.4305</b>  | 407.7189         | 813.4465        | 407.2269         | <b>7</b>  |
| 5  | 86.0964         | 619.3086        | 310.1579        | 602.2821        | 301.6447         | 601.2980         | 301.1527         | <b>I</b> | <b>702.4145</b>  | 351.7109        | 685.3879         | 343.1976         | 684.4039        | 342.7056         | <b>6</b>  |
| 6  | 101.0709        | 747.3672        | 374.1872        | 730.3406        | 365.6740         | 729.3566         | 365.1819         | <b>Q</b> | <b>589.3304</b>  | 295.1688        | 572.3039         | 286.6556         | 571.3198        | 286.1636         | <b>5</b>  |
| 7  | 74.0600         | 848.4149        | 424.7111        | <b>831.3883</b> | 416.1978         | 830.4043         | 415.7058         | <b>T</b> | <b>461.2718</b>  | 231.1395        | 444.2453         | 222.6263         | 443.2613        | 222.1343         | <b>4</b>  |
| 8  | 72.0808         | 947.4833        | 474.2453        | 930.4567        | 465.7320         | 929.4727         | 465.2400         | <b>V</b> | 360.2241         | 180.6157        | 343.1976         | 172.1024         |                 |                  | <b>3</b>  |
| 9  | 87.0553         | 1061.5262       | 531.2667        | 1044.4997       | 522.7535         | <b>1043.5156</b> | 522.2615         | <b>N</b> | <b>261.1557</b>  | 131.0815        | <b>244.1292</b>  | 122.5682         |                 |                  | <b>2</b>  |
| 10 | 101.1073        |                 |                 |                 |                  |                  |                  | <b>K</b> | 147.1128         | 74.0600         | 130.0863         | 65.5468          |                 |                  | <b>1</b>  |



MS/MS Fragmentation of **SMALADPENR**

Found in **Q13884**, Q13884|SNTB1\_HUMAN Beta-1-syntrophin OS=Homo sapiens GN=SNTB1 PE=1 SV=3

Match to Query 278: 1118.601752 from(560.308152,2+)

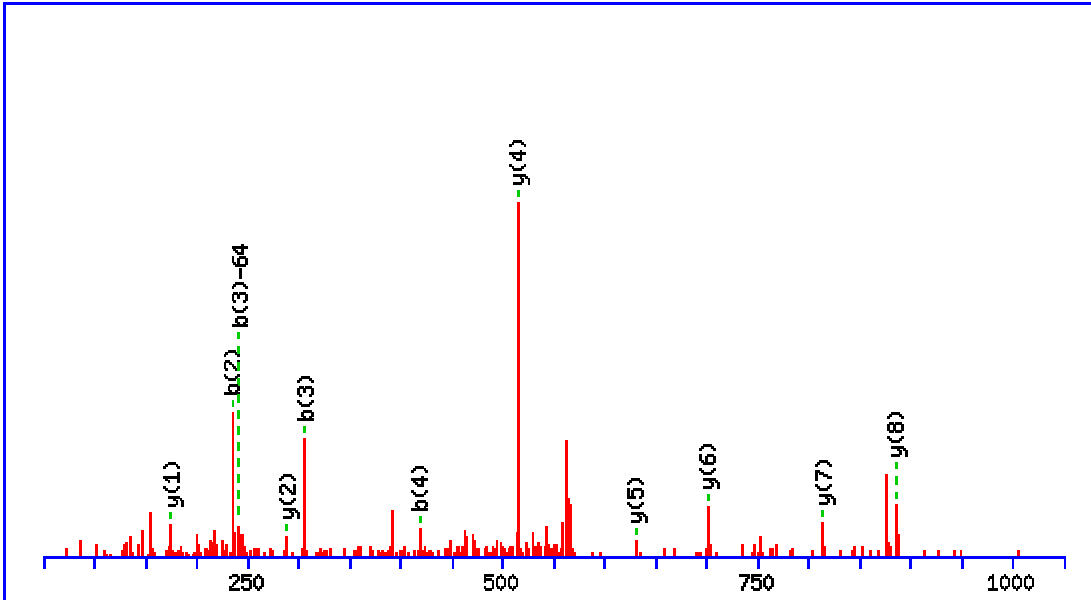

**Monoisotopic mass of neutral peptide Mr(calc):** 1118.5026

**Fixed modifications:** Carbamidomethyl (C)

**Variable modifications:**

**M2** : Oxidation (M), with neutral losses 0.0000(shown in table), 63.9983

**Ions Score:** 46 **Expect:** 0.0022

**Matches (Bold Red):** 11/139 fragment ions using 33 most intense peaks

| #  | Immon.   | b               | b <sup>++</sup> | b <sup>*</sup> | b <sup>+++</sup> | b <sup>0</sup> | b <sup>0++</sup> | Seq. | y               | y <sup>++</sup> | y <sup>*</sup> | y <sup>+++</sup> | y <sup>0</sup> | y <sup>0++</sup> | #  |
|----|----------|-----------------|-----------------|----------------|------------------|----------------|------------------|------|-----------------|-----------------|----------------|------------------|----------------|------------------|----|
| 1  | 60.0444  | 88.0393         | 44.5233         |                |                  | 70.0287        | 35.5180          | S    |                 |                 |                |                  |                |                  | 10 |
| 2  | 120.0478 | <b>235.0747</b> | 118.0410        |                |                  | 217.0641       | 109.0357         | M    | 1032.4779       | 516.7426        | 1015.4513      | 508.2293         | 1014.4673      | 507.7373         | 9  |
| 3  | 44.0495  | <b>306.1118</b> | 153.5595        |                |                  | 288.1013       | 144.5543         | A    | <b>885.4425</b> | 443.2249        | 868.4159       | 434.7116         | 867.4319       | 434.2196         | 8  |
| 4  | 86.0964  | <b>419.1959</b> | 210.1016        |                |                  | 401.1853       | 201.0963         | L    | <b>814.4054</b> | 407.7063        | 797.3788       | 399.1930         | 796.3948       | 398.7010         | 7  |
| 5  | 44.0495  | 490.2330        | 245.6201        |                |                  | 472.2224       | 236.6149         | A    | <b>701.3213</b> | 351.1643        | 684.2947       | 342.6510         | 683.3107       | 342.1590         | 6  |
| 6  | 88.0393  | 605.2599        | 303.1336        |                |                  | 587.2494       | 294.1283         | D    | <b>630.2842</b> | 315.6457        | 613.2576       | 307.1325         | 612.2736       | 306.6404         | 5  |
| 7  | 70.0651  | 702.3127        | 351.6600        |                |                  | 684.3021       | 342.6547         | P    | <b>515.2572</b> | 258.1323        | 498.2307       | 249.6190         | 497.2467       | 249.1270         | 4  |
| 8  | 102.0550 | 831.3553        | 416.1813        |                |                  | 813.3447       | 407.1760         | E    | 418.2045        | 209.6059        | 401.1779       | 201.0926         | 400.1939       | 200.6006         | 3  |
| 9  | 87.0553  | 945.3982        | 473.2028        | 928.3717       | 464.6895         | 927.3877       | 464.1975         | N    | <b>289.1619</b> | 145.0846        | 272.1353       | 136.5713         |                |                  | 2  |
| 10 | 129.1135 |                 |                 |                |                  |                |                  | R    | <b>175.1190</b> | 88.0631         | 158.0924       | 79.5498          |                |                  | 1  |

MS/MS Fragmentation of **DIMAEIYK**

Found in **P07858**, P07858|CATB\_HUMAN Cathepsin B OS=Homo sapiens GN=CTSB PE=1 SV=3

Match to Query 354: 997.441480 from(499.728016,2+)

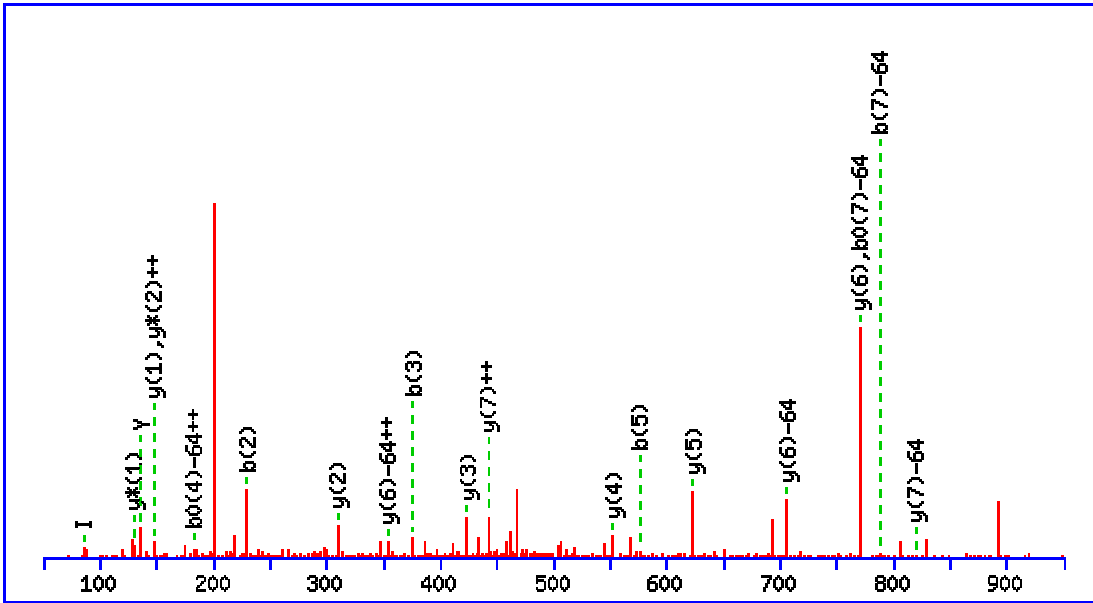

Monoisotopic mass of neutral peptide  $M_r(\text{calc})$ : 997.4790

Fixed modifications: Carbamidomethyl (C)

Variable modifications:

**M3** : Oxidation (M), with neutral losses 63.9983(shown in table), 0.0000

Ions Score: 36 Expect: 0.02

Matches (**Bold Red**): 21/105 fragment ions using 45 most intense peaks

| # | Immon.          | b               | b <sup>++</sup> | b <sup>0</sup>  | b <sup>0++</sup> | Seq.     | y               | y <sup>++</sup> | y*              | y <sup>*++</sup> | y <sup>0</sup> | y <sup>0++</sup> | # |
|---|-----------------|-----------------|-----------------|-----------------|------------------|----------|-----------------|-----------------|-----------------|------------------|----------------|------------------|---|
| 1 | 88.0393         | 116.0342        | 58.5207         | 98.0237         | 49.5155          | <b>D</b> |                 |                 |                 |                  |                |                  | 8 |
| 2 | <b>86.0964</b>  | <b>229.1183</b> | 115.0628        | 211.1077        | 106.0575         | <b>I</b> | <b>819.4611</b> | 410.2342        | 802.4345        | 401.7209         | 801.4505       | 401.2289         | 7 |
| 3 | 56.0495         | 312.1554        | 156.5813        | 294.1448        | 147.5761         | <b>M</b> | <b>706.3770</b> | <b>353.6921</b> | 689.3505        | 345.1789         | 688.3665       | 344.6869         | 6 |
| 4 | 44.0495         | 383.1925        | 192.0999        | 365.1820        | <b>183.0946</b>  | <b>A</b> | <b>623.3399</b> | 312.1736        | 606.3134        | 303.6603         | 605.3293       | 303.1683         | 5 |
| 5 | 102.0550        | 512.2351        | 256.6212        | 494.2245        | 247.6159         | <b>E</b> | <b>552.3028</b> | 276.6550        | 535.2762        | 268.1418         | 534.2922       | 267.6498         | 4 |
| 6 | <b>86.0964</b>  | 625.3192        | 313.1632        | 607.3086        | 304.1579         | <b>I</b> | <b>423.2602</b> | 212.1337        | 406.2336        | 203.6205         |                |                  | 3 |
| 7 | <b>136.0757</b> | <b>788.3825</b> | 394.6949        | <b>770.3719</b> | 385.6896         | <b>Y</b> | <b>310.1761</b> | 155.5917        | 293.1496        | <b>147.0784</b>  |                |                  | 2 |
| 8 | 101.1073        |                 |                 |                 |                  | <b>K</b> | <b>147.1128</b> | 74.0600         | <b>130.0863</b> | 65.5468          |                |                  | 1 |

MS/MS Fragmentation of **VGDYGSLSGR**

Found in **Q9UBR2**, Q9UBR2|CATZ\_HUMAN Cathepsin Z OS=Homo sapiens GN=CTSZ PE=1 SV=1

Match to Query 179: 1009.564070 from(505.789311,2+)

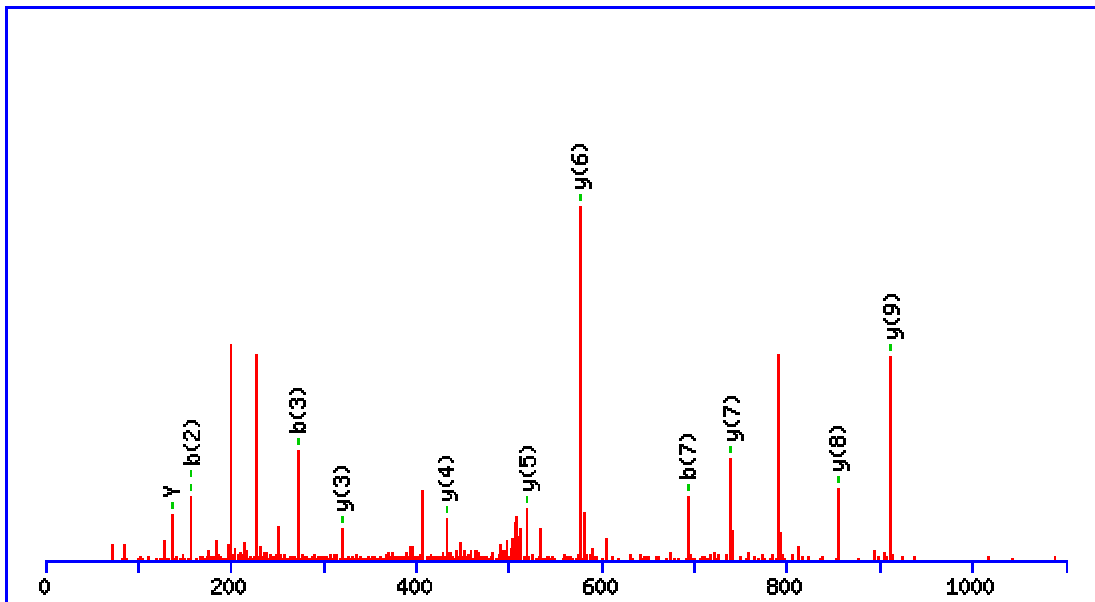

Monoisotopic mass of neutral peptide  $M_r(\text{calc})$ : 1009.4829

Fixed modifications: Carbamidomethyl (C)

Ions Score: 55 Expect: 0.00018

Matches (**Bold Red**): 11/92 fragment ions using 18 most intense peaks

| #  | Immon.          | b               | b <sup>++</sup> | b <sup>0</sup> | b <sup>0++</sup> | Seq. | y               | y <sup>++</sup> | y <sup>*</sup> | y <sup>*++</sup> | y <sup>0</sup> | y <sup>0++</sup> | #  |
|----|-----------------|-----------------|-----------------|----------------|------------------|------|-----------------|-----------------|----------------|------------------|----------------|------------------|----|
| 1  | 72.0808         | 100.0757        | 50.5415         |                |                  | V    |                 |                 |                |                  |                |                  | 10 |
| 2  | 30.0338         | <b>157.0972</b> | 79.0522         |                |                  | G    | <b>911.4217</b> | 456.2145        | 894.3952       | 447.7012         | 893.4112       | 447.2092         | 9  |
| 3  | 88.0393         | <b>272.1241</b> | 136.5657        | 254.1135       | 127.5604         | D    | <b>854.4003</b> | 427.7038        | 837.3737       | 419.1905         | 836.3897       | 418.6985         | 8  |
| 4  | <b>136.0757</b> | 435.1874        | 218.0974        | 417.1769       | 209.0921         | Y    | <b>739.3733</b> | 370.1903        | 722.3468       | 361.6770         | 721.3628       | 361.1850         | 7  |
| 5  | 30.0338         | 492.2089        | 246.6081        | 474.1983       | 237.6028         | G    | <b>576.3100</b> | 288.6586        | 559.2835       | 280.1454         | 558.2994       | 279.6534         | 6  |
| 6  | 60.0444         | 579.2409        | 290.1241        | 561.2304       | 281.1188         | S    | <b>519.2885</b> | 260.1479        | 502.2620       | 251.6346         | 501.2780       | 251.1426         | 5  |
| 7  | 86.0964         | <b>692.3250</b> | 346.6661        | 674.3144       | 337.6608         | L    | <b>432.2565</b> | 216.6319        | 415.2300       | 208.1186         | 414.2459       | 207.6266         | 4  |
| 8  | 60.0444         | 779.3570        | 390.1821        | 761.3464       | 381.1769         | S    | <b>319.1724</b> | 160.0899        | 302.1459       | 151.5766         | 301.1619       | 151.0846         | 3  |
| 9  | 30.0338         | 836.3785        | 418.6929        | 818.3679       | 409.6876         | G    | 232.1404        | 116.5738        | 215.1139       | 108.0606         |                |                  | 2  |
| 10 | 129.1135        |                 |                 |                |                  | R    | 175.1190        | 88.0631         | 158.0924       | 79.5498          |                |                  | 1  |

MS/MS Fragmentation of **LQATVQELQK**

Found in **P31146**, P31146|COR1A\_HUMAN Coronin-1A OS=Homo sapiens GN=CORO1A PE=1 SV=4

Match to Query 260: 1156.434300 from(579.224426,2+)

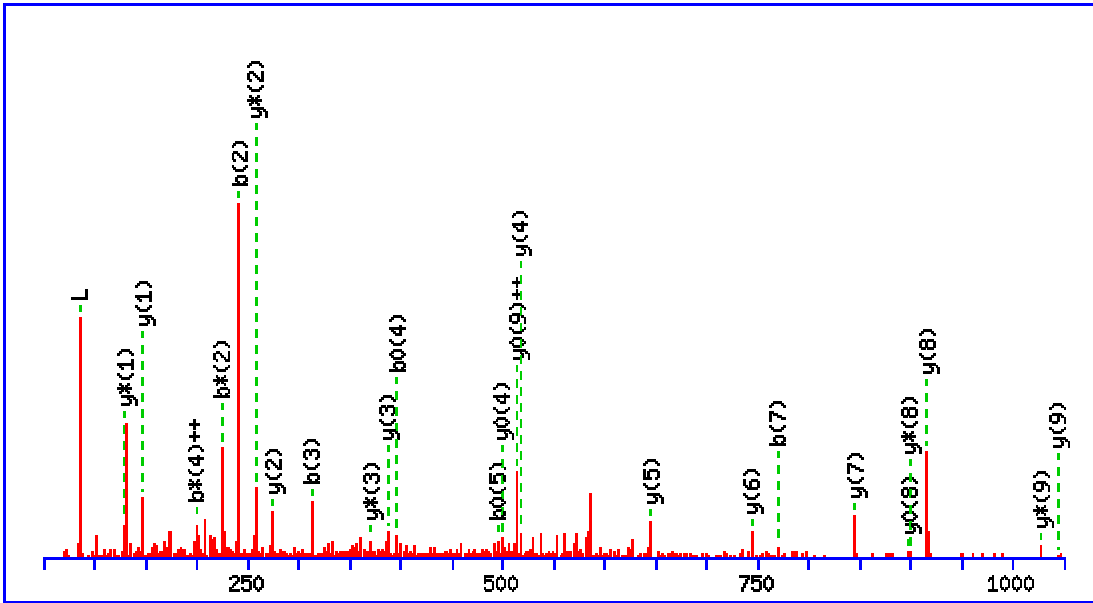

Monoisotopic mass of neutral peptide Mr(calc): 1156.6452

Fixed modifications: Carbamidomethyl (C)

Ions Score: 57 Expect: 0.00016

Matches (**Bold Red**): 26/104 fragment ions using 53 most intense peaks

| #  | Immon.         | b               | b <sup>++</sup> | b*              | b <sup>+++</sup> | b <sup>0</sup>  | b <sup>0++</sup> | Seq. | y                | y <sup>++</sup> | y*               | y <sup>+++</sup> | y <sup>0</sup>  | y <sup>0++</sup> | #  |
|----|----------------|-----------------|-----------------|-----------------|------------------|-----------------|------------------|------|------------------|-----------------|------------------|------------------|-----------------|------------------|----|
| 1  | <b>86.0964</b> | 114.0913        | 57.5493         |                 |                  |                 |                  | L    |                  |                 |                  |                  |                 |                  | 10 |
| 2  | 101.0709       | <b>242.1499</b> | 121.5786        | <b>225.1234</b> | 113.0653         |                 |                  | Q    | <b>1044.5684</b> | 522.7878        | <b>1027.5419</b> | 514.2746         | 1026.5578       | <b>513.7826</b>  | 9  |
| 3  | 44.0495        | <b>313.1870</b> | 157.0972        | 296.1605        | 148.5839         |                 |                  | A    | <b>916.5098</b>  | 458.7586        | <b>899.4833</b>  | 450.2453         | <b>898.4993</b> | 449.7533         | 8  |
| 4  | 74.0600        | 414.2347        | 207.6210        | 397.2082        | <b>199.1077</b>  | <b>396.2241</b> | 198.6157         | T    | <b>845.4727</b>  | 423.2400        | 828.4462         | 414.7267         | 827.4621        | 414.2347         | 7  |
| 5  | 72.0808        | 513.3031        | 257.1552        | 496.2766        | 248.6419         | <b>495.2926</b> | 248.1499         | V    | <b>744.4250</b>  | 372.7162        | 727.3985         | 364.2029         | 726.4145        | 363.7109         | 6  |
| 6  | 101.0709       | 641.3617        | 321.1845        | 624.3352        | 312.6712         | 623.3511        | 312.1792         | Q    | <b>645.3566</b>  | 323.1819        | 628.3301         | 314.6687         | 627.3461        | 314.1767         | 5  |
| 7  | 102.0550       | <b>770.4043</b> | 385.7058        | 753.3777        | 377.1925         | 752.3937        | 376.7005         | E    | <b>517.2980</b>  | 259.1527        | 500.2715         | 250.6394         | <b>499.2875</b> | 250.1474         | 4  |
| 8  | <b>86.0964</b> | 883.4884        | 442.2478        | 866.4618        | 433.7345         | 865.4778        | 433.2425         | L    | <b>388.2554</b>  | 194.6314        | <b>371.2289</b>  | 186.1181         |                 |                  | 3  |
| 9  | 101.0709       | 1011.5469       | 506.2771        | 994.5204        | 497.7638         | 993.5364        | 497.2718         | Q    | <b>275.1714</b>  | 138.0893        | <b>258.1448</b>  | 129.5761         |                 |                  | 2  |
| 10 | 101.1073       |                 |                 |                 |                  |                 |                  | K    | <b>147.1128</b>  | 74.0600         | <b>130.0863</b>  | 65.5468          |                 |                  | 1  |

MS/MS Fragmentation of **SSAEVIAQAR**

Found in **Q16555**, Q16555|DPYL2\_HUMAN Dihydropyrimidinase-related protein 2 OS=Homo sapiens  
GN=DPYSL2 PE=1 SV=1

Match to Query 160: 1030.390996 from(516.202774,2+)

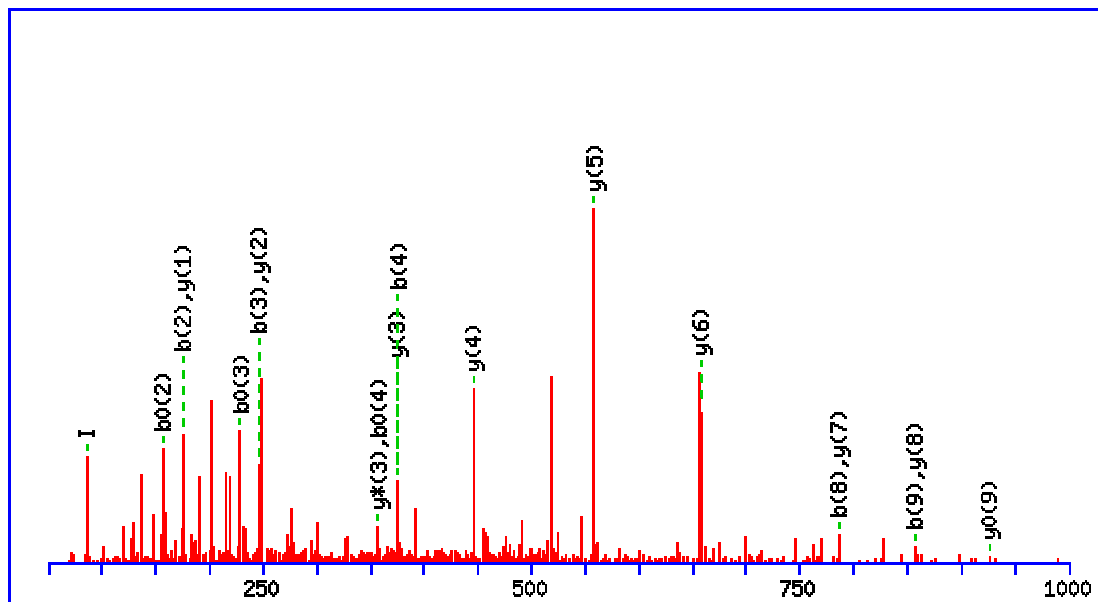

Monoisotopic mass of neutral peptide  $M_r(\text{calc})$ : 1030.5407

Fixed modifications: Carbamidomethyl (C)

Ions Score: 36 Expect: 0.023

Matches (**Bold Red**): 19/92 fragment ions using 47 most intense peaks

| #  | Immon.         | b               | b <sup>++</sup> | b <sup>*</sup> | b <sup>*++</sup> | b <sup>0</sup>  | b <sup>0++</sup> | Seq. | y               | y <sup>++</sup> | y <sup>*</sup>  | y <sup>*++</sup> | y <sup>0</sup>  | y <sup>0++</sup> | #  |
|----|----------------|-----------------|-----------------|----------------|------------------|-----------------|------------------|------|-----------------|-----------------|-----------------|------------------|-----------------|------------------|----|
| 1  | 60.0444        | 88.0393         | 44.5233         |                |                  | 70.0287         | 35.5180          | S    |                 |                 |                 |                  |                 |                  | 10 |
| 2  | 60.0444        | <b>175.0713</b> | 88.0393         |                |                  | <b>157.0608</b> | 79.0340          | S    | 944.5160        | 472.7616        | 927.4894        | 464.2483         | <b>926.5054</b> | 463.7563         | 9  |
| 3  | 44.0495        | <b>246.1084</b> | 123.5579        |                |                  | <b>228.0979</b> | 114.5526         | A    | <b>857.4839</b> | 429.2456        | 840.4574        | 420.7323         | 839.4734        | 420.2403         | 8  |
| 4  | 102.0550       | <b>375.1510</b> | 188.0792        |                |                  | <b>357.1405</b> | 179.0739         | E    | <b>786.4468</b> | 393.7271        | 769.4203        | 385.2138         | 768.4363        | 384.7218         | 7  |
| 5  | 72.0808        | 474.2195        | 237.6134        |                |                  | 456.2089        | 228.6081         | V    | <b>657.4042</b> | 329.2058        | 640.3777        | 320.6925         |                 |                  | 6  |
| 6  | <b>86.0964</b> | 587.3035        | 294.1554        |                |                  | 569.2930        | 285.1501         | I    | <b>558.3358</b> | 279.6715        | 541.3093        | 271.1583         |                 |                  | 5  |
| 7  | 44.0495        | 658.3406        | 329.6740        |                |                  | 640.3301        | 320.6687         | A    | <b>445.2518</b> | 223.1295        | 428.2252        | 214.6162         |                 |                  | 4  |
| 8  | 101.0709       | <b>786.3992</b> | 393.7032        | 769.3727       | 385.1900         | 768.3886        | 384.6980         | Q    | <b>374.2146</b> | 187.6110        | <b>357.1881</b> | 179.0977         |                 |                  | 3  |
| 9  | 44.0495        | <b>857.4363</b> | 429.2218        | 840.4098       | 420.7085         | 839.4258        | 420.2165         | A    | <b>246.1561</b> | 123.5817        | 229.1295        | 115.0684         |                 |                  | 2  |
| 10 | 129.1135       |                 |                 |                |                  |                 |                  | R    | <b>175.1190</b> | 88.0631         | 158.0924        | 79.5498          |                 |                  | 1  |

MS/MS Fragmentation of **VAQVAEITYGQK**

Found in **O94905**, O94905|ERLN2\_HUMAN Erlin-2 OS=Homo sapiens GN=ERLIN2 PE=1 SV=1

Match to Query 515: 1305.658748 from(653.836650,2+)

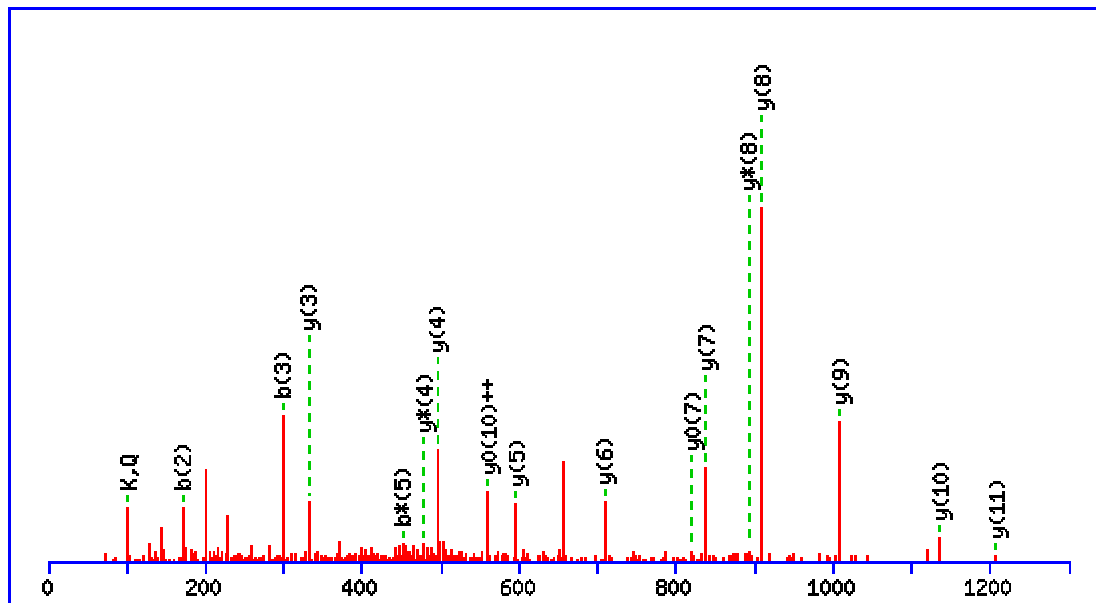

Monoisotopic mass of neutral peptide  $M_r(\text{calc})$ : 1305.6929

Fixed modifications: Carbamidomethyl (C)

Ions Score: 76 Expect: 1.6e-006

Matches (**Bold Red**): 19/122 fragment ions using 26 most intense peaks

| #  | Immon.          | b               | b <sup>++</sup> | b*              | b <sup>***</sup> | b <sup>0</sup> | b <sup>0++</sup> | Seq. | y                | y <sup>++</sup> | y*              | y <sup>***</sup> | y <sup>0</sup>  | y <sup>0++</sup> | #  |
|----|-----------------|-----------------|-----------------|-----------------|------------------|----------------|------------------|------|------------------|-----------------|-----------------|------------------|-----------------|------------------|----|
| 1  | 72.0808         | 100.0757        | 50.5415         |                 |                  |                |                  | V    |                  |                 |                 |                  |                 |                  | 12 |
| 2  | 44.0495         | <b>171.1128</b> | 86.0600         |                 |                  |                |                  | A    | <b>1207.6317</b> | 604.3195        | 1190.6052       | 595.8062         | 1189.6212       | 595.3142         | 11 |
| 3  | <b>101.0709</b> | <b>299.1714</b> | 150.0893        | 282.1448        | 141.5761         |                |                  | Q    | <b>1136.5946</b> | 568.8009        | 1119.5681       | 560.2877         | 1118.5841       | <b>559.7957</b>  | 10 |
| 4  | 72.0808         | 398.2398        | 199.6235        | 381.2132        | 191.1103         |                |                  | V    | <b>1008.5360</b> | 504.7717        | 991.5095        | 496.2584         | 990.5255        | 495.7664         | 9  |
| 5  | 44.0495         | 469.2769        | 235.1421        | <b>452.2504</b> | 226.6288         |                |                  | A    | <b>909.4676</b>  | 455.2375        | <b>892.4411</b> | 446.7242         | 891.4571        | 446.2322         | 8  |
| 6  | 102.0550        | 598.3195        | 299.6634        | 581.2930        | 291.1501         | 580.3089       | 290.6581         | E    | <b>838.4305</b>  | 419.7189        | 821.4040        | 411.2056         | <b>820.4199</b> | 410.7136         | 7  |
| 7  | 86.0964         | 711.4036        | 356.2054        | 694.3770        | 347.6921         | 693.3930       | 347.2001         | I    | <b>709.3879</b>  | 355.1976        | 692.3614        | 346.6843         | 691.3774        | 346.1923         | 6  |
| 8  | 74.0600         | 812.4512        | 406.7293        | 795.4247        | 398.2160         | 794.4407       | 397.7240         | T    | <b>596.3039</b>  | 298.6556        | 579.2773        | 290.1423         | 578.2933        | 289.6503         | 5  |
| 9  | 136.0757        | 975.5146        | 488.2609        | 958.4880        | 479.7477         | 957.5040       | 479.2556         | Y    | <b>495.2562</b>  | 248.1317        | <b>478.2296</b> | 239.6185         |                 |                  | 4  |
| 10 | 30.0338         | 1032.5360       | 516.7717        | 1015.5095       | 508.2584         | 1014.5255      | 507.7664         | G    | <b>332.1928</b>  | 166.6001        | 315.1663        | 158.0868         |                 |                  | 3  |
| 11 | <b>101.0709</b> | 1160.5946       | 580.8009        | 1143.5681       | 572.2877         | 1142.5841      | 571.7957         | Q    | 275.1714         | 138.0893        | 258.1448        | 129.5761         |                 |                  | 2  |
| 12 | <b>101.1073</b> |                 |                 |                 |                  |                |                  | K    | 147.1128         | 74.0600         | 130.0863        | 65.5468          |                 |                  | 1  |

MS/MS Fragmentation of **VIAAEGEMNASR**

Found in **P27105**, P27105|STOM\_HUMAN Erythrocyte band 7 integral membrane protein OS=Homo sapiens  
GN=STOM PE=1 SV=3

Match to Query 449: 1262.593980 from(632.304266,2+)

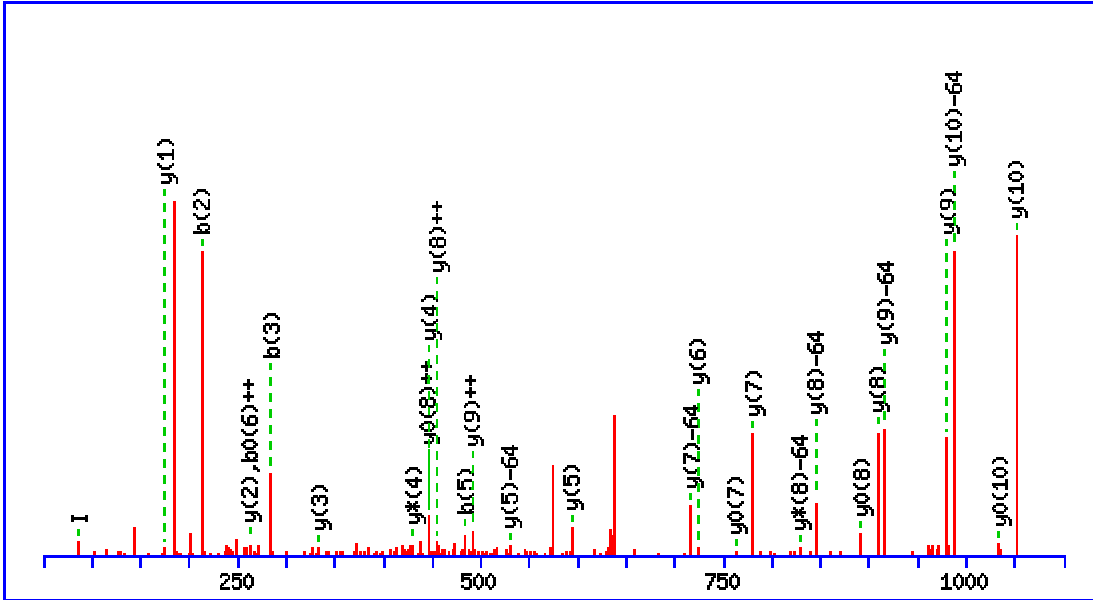

Monoisotopic mass of neutral peptide Mr(calc): 1262.5925

Fixed modifications: Carbamidomethyl (C)

Variable modifications:

M8 : Oxidation (M), with neutral losses 0.0000(shown in table), 63.9983

Ions Score: 60 Expect: 8.1e-005

Matches (Bold Red): 28/183 fragment ions using 53 most intense peaks

| #  | Immon.         | b               | b <sup>++</sup> | b <sup>*</sup> | b <sup>*++</sup> | b <sup>0</sup> | b <sup>0++</sup> | Seq. | y                | y <sup>++</sup> | y <sup>*</sup>  | y <sup>*++</sup> | y <sup>0</sup>   | y <sup>0++</sup> | #  |
|----|----------------|-----------------|-----------------|----------------|------------------|----------------|------------------|------|------------------|-----------------|-----------------|------------------|------------------|------------------|----|
| 1  | 72.0808        | 100.0757        | 50.5415         |                |                  |                |                  | V    |                  |                 |                 |                  |                  |                  | 12 |
| 2  | <b>86.0964</b> | <b>213.1598</b> | 107.0835        |                |                  |                |                  | I    | 1164.5314        | 582.7693        | 1147.5048       | 574.2560         | 1146.5208        | 573.7640         | 11 |
| 3  | 44.0495        | <b>284.1969</b> | 142.6021        |                |                  |                |                  | A    | <b>1051.4473</b> | 526.2273        | 1034.4208       | 517.7140         | <b>1033.4367</b> | 517.2220         | 10 |
| 4  | 44.0495        | 355.2340        | 178.1206        |                |                  |                |                  | A    | <b>980.4102</b>  | <b>490.7087</b> | 963.3836        | 482.1955         | 962.3996         | 481.7035         | 9  |
| 5  | 102.0550       | <b>484.2766</b> | 242.6419        |                |                  | 466.2660       | 233.6366         | E    | <b>909.3731</b>  | <b>455.1902</b> | 892.3465        | 446.6769         | <b>891.3625</b>  | <b>446.1849</b>  | 8  |
| 6  | 30.0338        | 541.2980        | 271.1527        |                |                  | 523.2875       | <b>262.1474</b>  | G    | <b>780.3305</b>  | 390.6689        | 763.3039        | 382.1556         | <b>762.3199</b>  | 381.6636         | 7  |
| 7  | 102.0550       | 670.3406        | 335.6740        |                |                  | 652.3301       | 326.6687         | E    | <b>723.3090</b>  | 362.1581        | 706.2825        | 353.6449         | 705.2985         | 353.1529         | 6  |
| 8  | 120.0478       | 817.3760        | 409.1917        |                |                  | 799.3655       | 400.1864         | M    | <b>594.2664</b>  | 297.6369        | 577.2399        | 289.1236         | 576.2559         | 288.6316         | 5  |
| 9  | 87.0553        | 931.4190        | 466.2131        | 914.3924       | 457.6998         | 913.4084       | 457.2078         | N    | <b>447.2310</b>  | 224.1191        | <b>430.2045</b> | 215.6059         | 429.2205         | 215.1139         | 4  |
| 10 | 44.0495        | 1002.4561       | 501.7317        | 985.4295       | 493.2184         | 984.4455       | 492.7264         | A    | <b>333.1881</b>  | 167.0977        | 316.1615        | 158.5844         | 315.1775         | 158.0924         | 3  |
| 11 | 60.0444        | 1089.4881       | 545.2477        | 1072.4616      | 536.7344         | 1071.4775      | 536.2424         | S    | <b>262.1510</b>  | 131.5791        | 245.1244        | 123.0659         | 244.1404         | 122.5738         | 2  |
| 12 | 129.1135       |                 |                 |                |                  |                |                  | R    | <b>175.1190</b>  | 88.0631         | 158.0924        | 79.5498          |                  |                  | 1  |

MS/MS Fragmentation of **ELSEQIQR**

Found in **P15311**, P15311|EZRI\_HUMAN Ezrin OS=Homo sapiens GN=EZR PE=1 SV=4

Match to Query 290: 1001.508814 from(501.761683,2+)

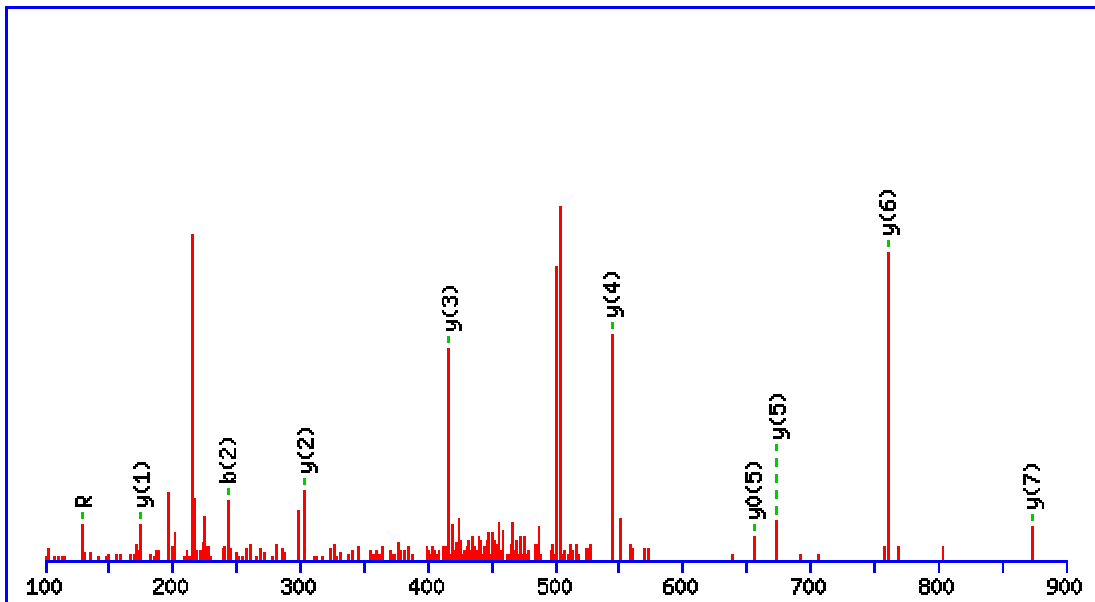

Monoisotopic mass of neutral peptide **Mr(calc)**: 1001.5141

**Fixed modifications**: Carbamidomethyl (C)

**Ions Score**: 39 **Expect**: 0.012

**Matches (Bold Red)**: 10/76 fragment ions using 24 most intense peaks

| # | Immon.          | b               | b <sup>++</sup> | b <sup>*</sup> | b <sup>*++</sup> | b <sup>0</sup> | b <sup>0++</sup> | Seq. | y               | y <sup>++</sup> | y <sup>*</sup> | y <sup>*++</sup> | y <sup>0</sup>  | y <sup>0++</sup> | # |
|---|-----------------|-----------------|-----------------|----------------|------------------|----------------|------------------|------|-----------------|-----------------|----------------|------------------|-----------------|------------------|---|
| 1 | 102.0550        | 130.0499        | 65.5286         |                |                  | 112.0393       | 56.5233          | E    |                 |                 |                |                  |                 |                  | 8 |
| 2 | 86.0964         | <b>243.1339</b> | 122.0706        |                |                  | 225.1234       | 113.0653         | L    | <b>873.4789</b> | 437.2431        | 856.4523       | 428.7298         | 855.4683        | 428.2378         | 7 |
| 3 | 60.0444         | 330.1660        | 165.5866        |                |                  | 312.1554       | 156.5813         | S    | <b>760.3948</b> | 380.7010        | 743.3682       | 372.1878         | 742.3842        | 371.6958         | 6 |
| 4 | 102.0550        | 459.2086        | 230.1079        |                |                  | 441.1980       | 221.1026         | E    | <b>673.3628</b> | 337.1850        | 656.3362       | 328.6717         | <b>655.3522</b> | 328.1797         | 5 |
| 5 | 101.0709        | 587.2671        | 294.1372        | 570.2406       | 285.6239         | 569.2566       | 285.1319         | Q    | <b>544.3202</b> | 272.6637        | 527.2936       | 264.1504         |                 |                  | 4 |
| 6 | 86.0964         | 700.3512        | 350.6792        | 683.3246       | 342.1660         | 682.3406       | 341.6740         | I    | <b>416.2616</b> | 208.6344        | 399.2350       | 200.1212         |                 |                  | 3 |
| 7 | 101.0709        | 828.4098        | 414.7085        | 811.3832       | 406.1953         | 810.3992       | 405.7032         | Q    | <b>303.1775</b> | 152.0924        | 286.1510       | 143.5791         |                 |                  | 2 |
| 8 | <b>129.1135</b> |                 |                 |                |                  |                |                  | R    | <b>175.1190</b> | 88.0631         | 158.0924       | 79.5498          |                 |                  | 1 |



MS/MS Fragmentation of **LPDGYEFK**

Found in **P09382**, P09382|LEG1\_HUMAN Galectin-1 OS=Homo sapiens GN=LGALS1 PE=1 SV=2

Match to Query 286: 967.493274 from(484.753913,2+)

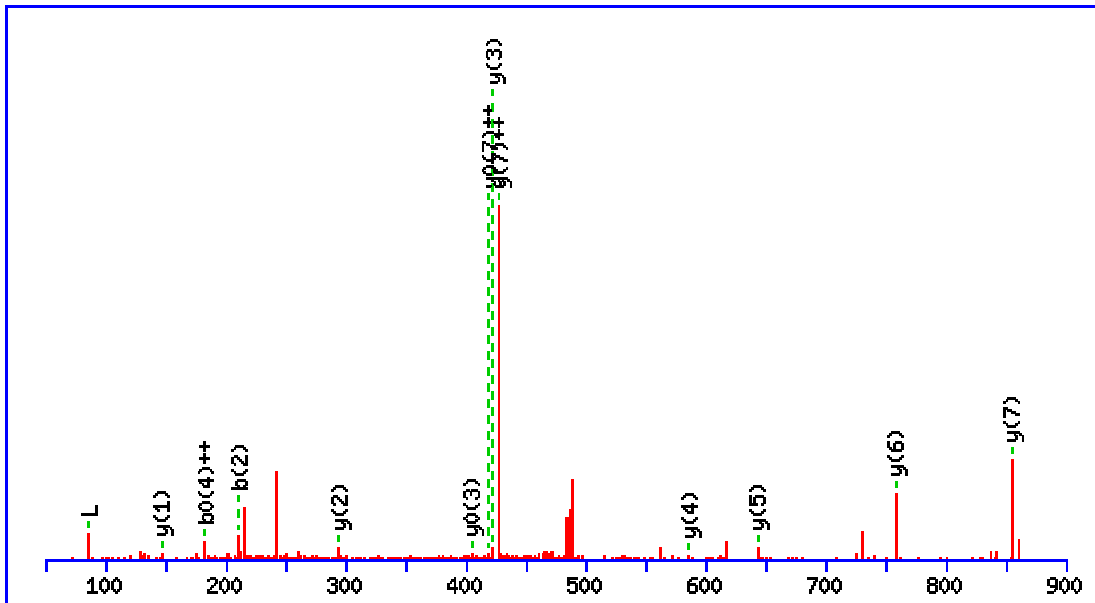

**Monoisotopic mass of neutral peptide Mr(calc):** 967.4651

**Fixed modifications:** Carbamidomethyl (C)

**Ions Score:** 39 **Expect:** 0.0087

**Matches (Bold Red):** 13/70 fragment ions using 33 most intense peaks

| # | Immon.         | b               | b <sup>++</sup> | b <sup>0</sup> | b <sup>0++</sup> | Seq. | y               | y <sup>++</sup> | y <sup>*</sup> | y <sup>*++</sup> | y <sup>0</sup>  | y <sup>0++</sup> | # |
|---|----------------|-----------------|-----------------|----------------|------------------|------|-----------------|-----------------|----------------|------------------|-----------------|------------------|---|
| 1 | <b>86.0964</b> | 114.0913        | 57.5493         |                |                  | L    |                 |                 |                |                  |                 |                  | 8 |
| 2 | 70.0651        | <b>211.1441</b> | 106.0757        |                |                  | P    | <b>855.3883</b> | <b>428.1978</b> | 838.3618       | 419.6845         | 837.3777        | <b>419.1925</b>  | 7 |
| 3 | 88.0393        | 326.1710        | 163.5892        | 308.1605       | 154.5839         | D    | <b>758.3355</b> | 379.6714        | 741.3090       | 371.1581         | 740.3250        | 370.6661         | 6 |
| 4 | 30.0338        | 383.1925        | 192.0999        | 365.1819       | <b>183.0946</b>  | G    | <b>643.3086</b> | 322.1579        | 626.2821       | 313.6447         | 625.2980        | 313.1527         | 5 |
| 5 | 136.0757       | 546.2558        | 273.6316        | 528.2453       | 264.6263         | Y    | <b>586.2871</b> | 293.6472        | 569.2606       | 285.1339         | 568.2766        | 284.6419         | 4 |
| 6 | 102.0550       | 675.2984        | 338.1529        | 657.2879       | 329.1476         | E    | <b>423.2238</b> | 212.1155        | 406.1973       | 203.6023         | <b>405.2132</b> | 203.1103         | 3 |
| 7 | 120.0808       | 822.3668        | 411.6871        | 804.3563       | 402.6818         | F    | <b>294.1812</b> | 147.5942        | 277.1547       | 139.0810         |                 |                  | 2 |
| 8 | 101.1073       |                 |                 |                |                  | K    | <b>147.1128</b> | 74.0600         | 130.0863       | 65.5468          |                 |                  | 1 |

MS/MS Fragmentation of **GSAPPGVPVEGSIR**

Found in **P78417**, P78417|GSTO1\_HUMAN Glutathione transferase omega-1 OS=Homo sapiens GN=GSTO1 PE=1 SV=2

Match to Query 588: 1319.661692 from(660.838122,2,+)

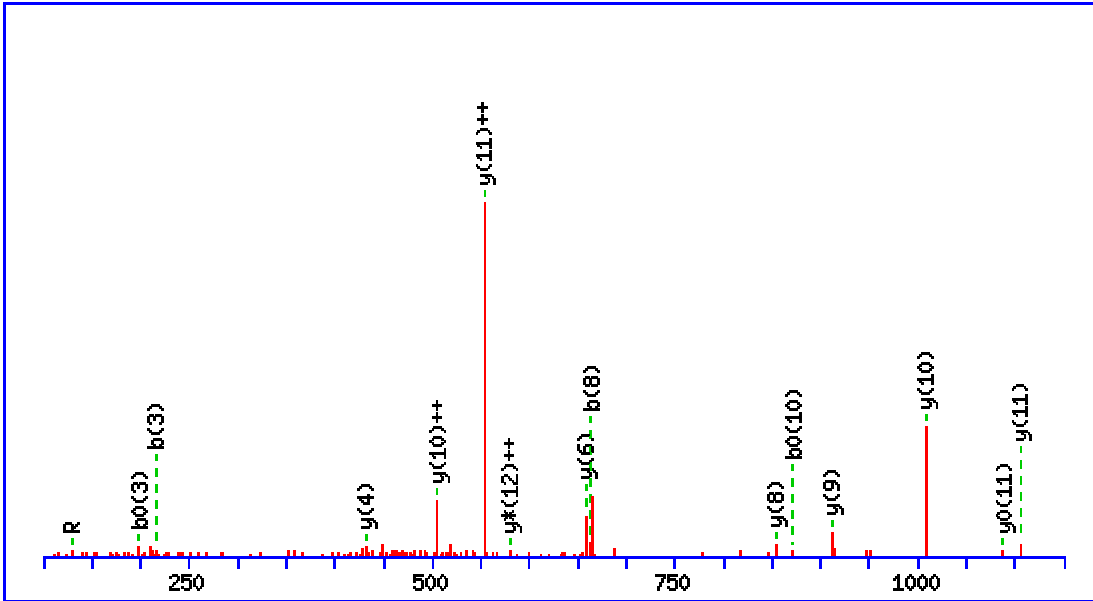

Monoisotopic mass of neutral peptide Mr(calc): 1319.6834

Fixed modifications: Carbamidomethyl (C)

Ions Score: 32 Expect: 0.049

Matches (Bold Red): 15/138 fragment ions using 34 most intense peaks

| #  | Immon.          | b               | b <sup>++</sup> | b <sup>0</sup>  | b <sup>0++</sup> | Seq. | y                | y <sup>++</sup> | y <sup>*</sup> | y <sup>*++</sup> | y <sup>0</sup>   | y <sup>0++</sup> | #  |
|----|-----------------|-----------------|-----------------|-----------------|------------------|------|------------------|-----------------|----------------|------------------|------------------|------------------|----|
| 1  | 30.0338         | 58.0287         | 29.5180         |                 |                  | G    |                  |                 |                |                  |                  |                  | 14 |
| 2  | 60.0444         | 145.0608        | 73.0340         | 127.0502        | 64.0287          | S    | 1263.6692        | 632.3382        | 1246.6426      | 623.8250         | 1245.6586        | 623.3329         | 13 |
| 3  | 44.0495         | <b>216.0979</b> | 108.5526        | <b>198.0873</b> | 99.5473          | A    | 1176.6371        | 588.8222        | 1159.6106      | <b>580.3089</b>  | 1158.6266        | 579.8169         | 12 |
| 4  | 70.0651         | 313.1506        | 157.0790        | 295.1401        | 148.0737         | P    | <b>1105.6000</b> | <b>553.3037</b> | 1088.5735      | 544.7904         | <b>1087.5895</b> | 544.2984         | 11 |
| 5  | 70.0651         | 410.2034        | 205.6053        | 392.1928        | 196.6001         | P    | <b>1008.5473</b> | <b>504.7773</b> | 991.5207       | 496.2640         | 990.5367         | 495.7720         | 10 |
| 6  | 30.0338         | 467.2249        | 234.1161        | 449.2143        | 225.1108         | G    | <b>911.4945</b>  | 456.2509        | 894.4680       | 447.7376         | 893.4839         | 447.2456         | 9  |
| 7  | 70.0651         | 564.2776        | 282.6425        | 546.2671        | 273.6372         | P    | <b>854.4730</b>  | 427.7402        | 837.4465       | 419.2269         | 836.4625         | 418.7349         | 8  |
| 8  | 72.0808         | <b>663.3461</b> | 332.1767        | 645.3355        | 323.1714         | V    | 757.4203         | 379.2138        | 740.3937       | 370.7005         | 739.4097         | 370.2085         | 7  |
| 9  | 70.0651         | 760.3988        | 380.7030        | 742.3883        | 371.6978         | P    | <b>658.3519</b>  | 329.6796        | 641.3253       | 321.1663         | 640.3413         | 320.6743         | 6  |
| 10 | 102.0550        | 889.4414        | 445.2243        | <b>871.4308</b> | 436.2191         | E    | 561.2991         | 281.1532        | 544.2726       | 272.6399         | 543.2885         | 272.1479         | 5  |
| 11 | 30.0338         | 946.4629        | 473.7351        | 928.4523        | 464.7298         | G    | <b>432.2565</b>  | 216.6319        | 415.2300       | 208.1186         | 414.2459         | 207.6266         | 4  |
| 12 | 60.0444         | 1033.4949       | 517.2511        | 1015.4843       | 508.2458         | S    | 375.2350         | 188.1212        | 358.2085       | 179.6079         | 357.2245         | 179.1159         | 3  |
| 13 | 86.0964         | 1146.5790       | 573.7931        | 1128.5684       | 564.7878         | I    | 288.2030         | 144.6051        | 271.1765       | 136.0919         |                  |                  | 2  |
| 14 | <b>129.1135</b> |                 |                 |                 |                  | R    | 175.1190         | 88.0631         | 158.0924       | 79.5498          |                  |                  | 1  |

MS/MS Fragmentation of **LAVQQVEEAQQLR**

Found in **O00461**, O00461|GOLI4\_HUMAN Golgi integral membrane protein 4 OS=Homo sapiens  
 GN=GOLIM4 PE=1 SV=1

Match to Query 685: 1510.763410 from(756.388981,2,+)

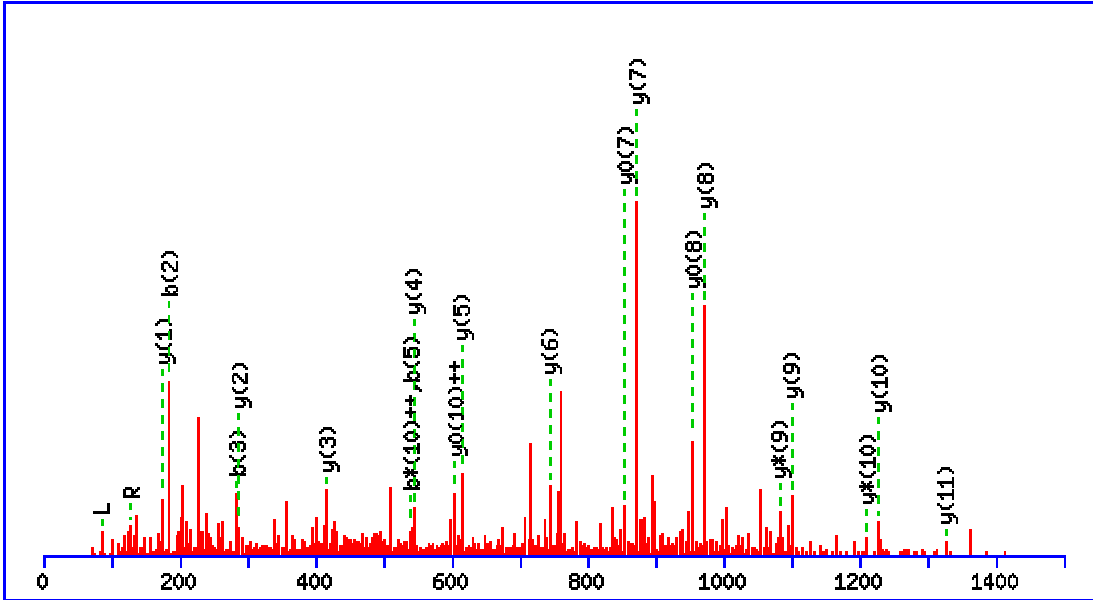

**Monoisotopic mass of neutral peptide Mr(calc):** 1510.8103

**Fixed modifications:** Carbamidomethyl (C)

**Ions Score:** 58 **Expect:** 0.00011

**Matches (Bold Red):** 23/129 fragment ions using 55 most intense peaks

| #  | Immon.          | b               | b <sup>++</sup> | b*        | b <sup>*++</sup> | b <sup>0</sup> | b <sup>0++</sup> | Seq. | y                | y <sup>++</sup> | y*               | y <sup>*++</sup> | y <sup>0</sup>  | y <sup>0++</sup> | #  |
|----|-----------------|-----------------|-----------------|-----------|------------------|----------------|------------------|------|------------------|-----------------|------------------|------------------|-----------------|------------------|----|
| 1  | <b>86.0964</b>  | 114.0913        | 57.5493         |           |                  |                |                  | L    |                  |                 |                  |                  |                 |                  | 13 |
| 2  | 44.0495         | <b>185.1285</b> | 93.0679         |           |                  |                |                  | A    | 1398.7336        | 699.8704        | 1381.7070        | 691.3571         | 1380.7230       | 690.8651         | 12 |
| 3  | 72.0808         | <b>284.1969</b> | 142.6021        |           |                  |                |                  | V    | <b>1327.6965</b> | 664.3519        | 1310.6699        | 655.8386         | 1309.6859       | 655.3466         | 11 |
| 4  | 101.0709        | 412.2554        | 206.6314        | 395.2289  | 198.1181         |                |                  | Q    | <b>1228.6280</b> | 614.8177        | <b>1211.6015</b> | 606.3044         | 1210.6175       | <b>605.8124</b>  | 10 |
| 5  | 101.0709        | <b>540.3140</b> | 270.6607        | 523.2875  | 262.1474         |                |                  | Q    | <b>1100.5695</b> | 550.7884        | <b>1083.5429</b> | 542.2751         | 1082.5589       | 541.7831         | 9  |
| 6  | 72.0808         | 639.3824        | 320.1949        | 622.3559  | 311.6816         |                |                  | V    | <b>972.5109</b>  | 486.7591        | 955.4843         | 478.2458         | <b>954.5003</b> | 477.7538         | 8  |
| 7  | 102.0550        | 768.4250        | 384.7162        | 751.3985  | 376.2029         | 750.4145       | 375.7109         | E    | <b>873.4425</b>  | 437.2249        | 856.4159         | 428.7116         | <b>855.4319</b> | 428.2196         | 7  |
| 8  | 102.0550        | 897.4676        | 449.2375        | 880.4411  | 440.7242         | 879.4571       | 440.2322         | E    | <b>744.3999</b>  | 372.7036        | 727.3733         | 364.1903         | 726.3893        | 363.6983         | 6  |
| 9  | 44.0495         | 968.5047        | 484.7560        | 951.4782  | 476.2427         | 950.4942       | 475.7507         | A    | <b>615.3573</b>  | 308.1823        | 598.3307         | 299.6690         |                 |                  | 5  |
| 10 | 101.0709        | 1096.5633       | 548.7853        | 1079.5368 | <b>540.2720</b>  | 1078.5528      | 539.7800         | Q    | <b>544.3202</b>  | 272.6637        | 527.2936         | 264.1504         |                 |                  | 4  |
| 11 | 101.0709        | 1224.6219       | 612.8146        | 1207.5953 | 604.3013         | 1206.6113      | 603.8093         | Q    | <b>416.2616</b>  | 208.6344        | 399.2350         | 200.1212         |                 |                  | 3  |
| 12 | <b>86.0964</b>  | 1337.7060       | 669.3566        | 1320.6794 | 660.8433         | 1319.6954      | 660.3513         | L    | <b>288.2030</b>  | 144.6051        | 271.1765         | 136.0919         |                 |                  | 2  |
| 13 | <b>129.1135</b> |                 |                 |           |                  |                |                  | R    | <b>175.1190</b>  | 88.0631         | 158.0924         | 79.5498          |                 |                  | 1  |

MS/MS Fragmentation of **VLLDDTQSEAAR**

Found in **Q14789**, Q14789|GOLGB1\_HUMAN Golgin subfamily B member 1 OS=Homo sapiens  
 GN=GOLGB1 PE=1 SV=2

Match to Query 424: 1316.593316 from(659.303934,2+)

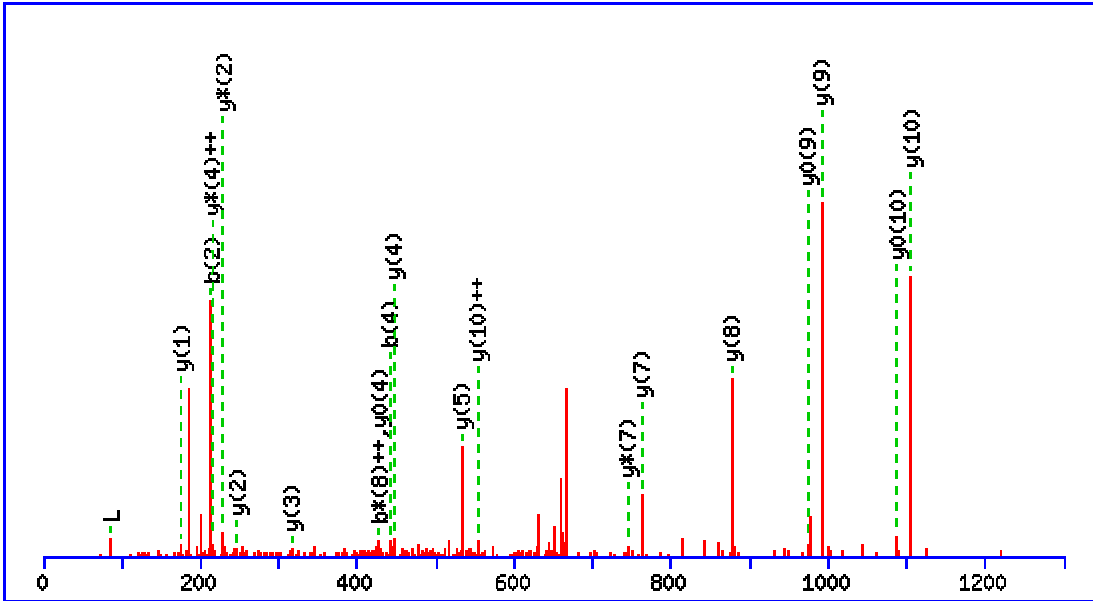

Monoisotopic mass of neutral peptide **Mr(calc):** 1316.6572

Fixed modifications: Carbamidomethyl (C)

Ions Score: 44 Expect: 0.0033

Matches (**Bold Red**): 21/120 fragment ions using 38 most intense peaks

| #  | Immon.         | b               | b <sup>++</sup> | b <sup>*</sup> | b <sup>*++</sup> | b <sup>0</sup> | b <sup>0++</sup> | Seq. | y                | y <sup>++</sup> | y <sup>*</sup>  | y <sup>*++</sup> | y <sup>0</sup>   | y <sup>0++</sup> | #  |
|----|----------------|-----------------|-----------------|----------------|------------------|----------------|------------------|------|------------------|-----------------|-----------------|------------------|------------------|------------------|----|
| 1  | 72.0808        | 100.0757        | 50.5415         |                |                  |                |                  | V    |                  |                 |                 |                  |                  |                  | 12 |
| 2  | <b>86.0964</b> | <b>213.1598</b> | 107.0835        |                |                  |                |                  | L    | 1218.5961        | 609.8017        | 1201.5695       | 601.2884         | 1200.5855        | 600.7964         | 11 |
| 3  | <b>86.0964</b> | 326.2438        | 163.6255        |                |                  |                |                  | L    | <b>1105.5120</b> | <b>553.2596</b> | 1088.4855       | 544.7464         | <b>1087.5014</b> | 544.2544         | 10 |
| 4  | 88.0393        | <b>441.2708</b> | 221.1390        |                |                  | 423.2602       | 212.1337         | D    | <b>992.4279</b>  | 496.7176        | 975.4014        | 488.2043         | <b>974.4174</b>  | 487.7123         | 9  |
| 5  | 88.0393        | 556.2977        | 278.6525        |                |                  | 538.2871       | 269.6472         | D    | <b>877.4010</b>  | 439.2041        | 860.3745        | 430.6909         | 859.3904         | 430.1989         | 8  |
| 6  | 74.0600        | 657.3454        | 329.1763        |                |                  | 639.3348       | 320.1710         | T    | <b>762.3741</b>  | 381.6907        | <b>745.3475</b> | 373.1774         | 744.3635         | 372.6854         | 7  |
| 7  | 101.0709       | 785.4040        | 393.2056        | 768.3774       | 384.6923         | 767.3934       | 384.2003         | Q    | 661.3264         | 331.1668        | 644.2998        | 322.6536         | 643.3158         | 322.1615         | 6  |
| 8  | 60.0444        | 872.4360        | 436.7216        | 855.4094       | <b>428.2084</b>  | 854.4254       | 427.7164         | S    | <b>533.2678</b>  | 267.1375        | 516.2413        | 258.6243         | 515.2572         | 258.1323         | 5  |
| 9  | 102.0550       | 1001.4786       | 501.2429        | 984.4520       | 492.7297         | 983.4680       | 492.2376         | E    | <b>446.2358</b>  | 223.6215        | 429.2092        | <b>215.1083</b>  | <b>428.2252</b>  | 214.6162         | 4  |
| 10 | 44.0495        | 1072.5157       | 536.7615        | 1055.4891      | 528.2482         | 1054.5051      | 527.7562         | A    | <b>317.1932</b>  | 159.1002        | 300.1666        | 150.5870         |                  |                  | 3  |
| 11 | 44.0495        | 1143.5528       | 572.2800        | 1126.5263      | 563.7668         | 1125.5422      | 563.2748         | A    | <b>246.1561</b>  | 123.5817        | <b>229.1295</b> | 115.0684         |                  |                  | 2  |
| 12 | 129.1135       |                 |                 |                |                  |                |                  | R    | <b>175.1190</b>  | 88.0631         | 158.0924        | 79.5498          |                  |                  | 1  |

MS/MS Fragmentation of **QSLTMDPVVK**

Found in **P34932**, P34932|HSP74\_HUMAN Heat shock 70 kDa protein 4 OS=Homo sapiens GN=HSPA4 PE=1 SV=4

Match to Query 327: 1132.546192 from(567.280372,2+)

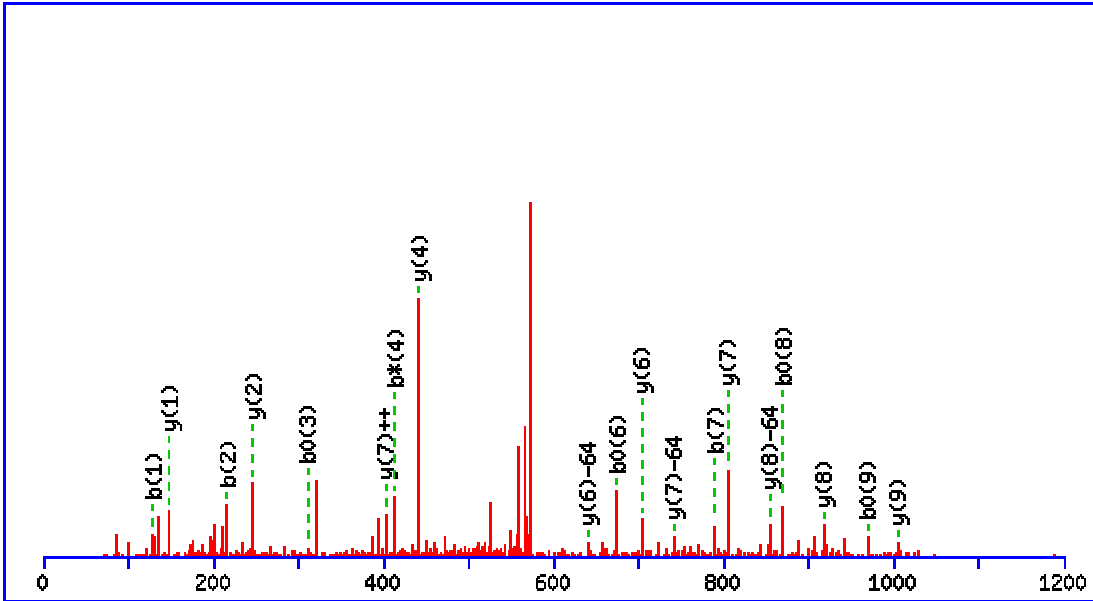

Monoisotopic mass of neutral peptide Mr(calc): 1132.5798

Fixed modifications: Carbamidomethyl (C)

Variable modifications:

M5 : Oxidation (M), with neutral losses 0.0000(shown in table), 63.9983

Ions Score: 42 Expect: 0.0056

Matches (Bold Red): 19/163 fragment ions using 34 most intense peaks

| #  | Immon.   | b               | b <sup>++</sup> | b <sup>*</sup>  | b <sup>*++</sup> | b <sup>0</sup>  | b <sup>0++</sup> | Seq. | y                | y <sup>++</sup> | y <sup>*</sup> | y <sup>*++</sup> | y <sup>0</sup> | y <sup>0++</sup> | #  |
|----|----------|-----------------|-----------------|-----------------|------------------|-----------------|------------------|------|------------------|-----------------|----------------|------------------|----------------|------------------|----|
| 1  | 101.0709 | <b>129.0659</b> | 65.0366         | 112.0393        | 56.5233          |                 |                  | Q    |                  |                 |                |                  |                |                  | 10 |
| 2  | 60.0444  | <b>216.0979</b> | 108.5526        | 199.0713        | 100.0393         | 198.0873        | 99.5473          | S    | <b>1005.5285</b> | 503.2679        | 988.5020       | 494.7546         | 987.5179       | 494.2626         | 9  |
| 3  | 86.0964  | 329.1819        | 165.0946        | 312.1554        | 156.5813         | <b>311.1714</b> | 156.0893         | L    | <b>918.4965</b>  | 459.7519        | 901.4699       | 451.2386         | 900.4859       | 450.7466         | 8  |
| 4  | 74.0600  | 430.2296        | 215.6185        | <b>413.2031</b> | 207.1052         | 412.2191        | 206.6132         | T    | <b>805.4124</b>  | <b>403.2098</b> | 788.3859       | 394.6966         | 787.4019       | 394.2046         | 7  |
| 5  | 120.0478 | 577.2650        | 289.1362        | 560.2385        | 280.6229         | 559.2545        | 280.1309         | M    | <b>704.3647</b>  | 352.6860        | 687.3382       | 344.1727         | 686.3542       | 343.6807         | 6  |
| 6  | 88.0393  | 692.2920        | 346.6496        | 675.2654        | 338.1363         | <b>674.2814</b> | 337.6443         | D    | 557.3293         | 279.1683        | 540.3028       | 270.6550         | 539.3188       | 270.1630         | 5  |
| 7  | 70.0651  | <b>789.3447</b> | 395.1760        | 772.3182        | 386.6627         | 771.3342        | 386.1707         | P    | <b>442.3024</b>  | 221.6548        | 425.2758       | 213.1416         |                |                  | 4  |
| 8  | 72.0808  | 888.4131        | 444.7102        | 871.3866        | 436.1969         | <b>870.4026</b> | 435.7049         | V    | 345.2496         | 173.1285        | 328.2231       | 164.6152         |                |                  | 3  |
| 9  | 72.0808  | 987.4816        | 494.2444        | 970.4550        | 485.7311         | <b>969.4710</b> | 485.2391         | V    | <b>246.1812</b>  | 123.5942        | 229.1547       | 115.0810         |                |                  | 2  |
| 10 | 101.1073 |                 |                 |                 |                  |                 |                  | K    | <b>147.1128</b>  | 74.0600         | 130.0863       | 65.5468          |                |                  | 1  |

MS/MS Fragmentation of **QLSSGVSEIR**

Found in **P04792**, P04792|HSPB1\_HUMAN Heat shock protein beta-1 OS=Homo sapiens GN=HSPB1 PE=1 SV=2

Match to Query 222: 1074.629174 from(538.321863,2+)

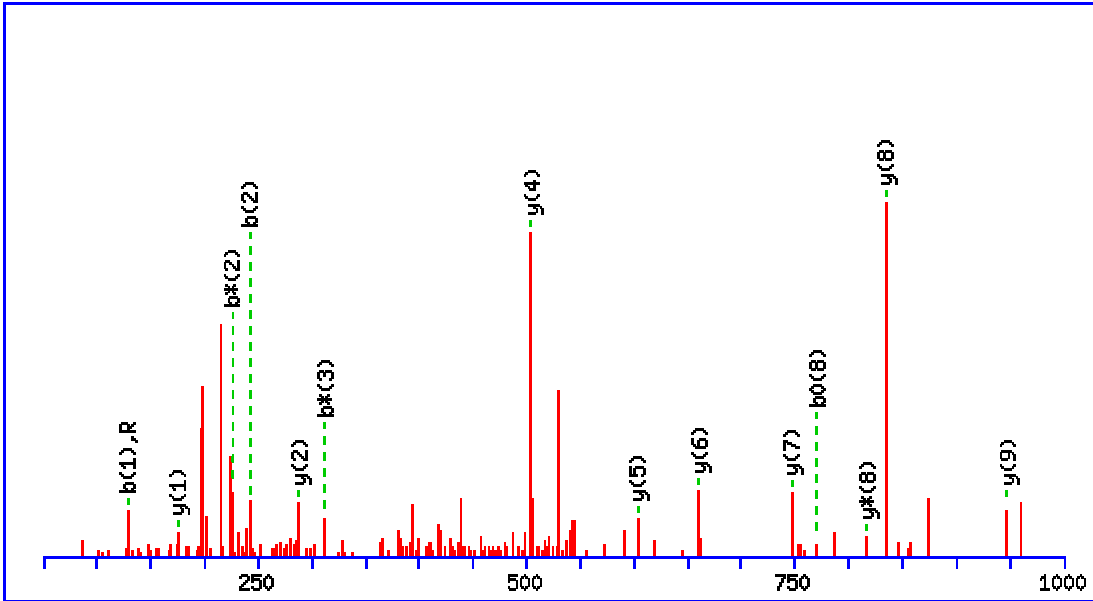

Monoisotopic mass of neutral peptide Mr(calc): 1074.5669

Fixed modifications: Carbamidomethyl (C)

Ions Score: 62 Expect: 5.5e-005

Matches (Bold Red): 15/110 fragment ions using 26 most intense peaks

| #  | Immon.          | b               | b <sup>++</sup> | b*              | b <sup>+++</sup> | b <sup>0</sup>  | b <sup>0++</sup> | Seq. | y               | y <sup>++</sup> | y*              | y <sup>+++</sup> | y <sup>0</sup> | y <sup>0++</sup> | #  |
|----|-----------------|-----------------|-----------------|-----------------|------------------|-----------------|------------------|------|-----------------|-----------------|-----------------|------------------|----------------|------------------|----|
| 1  | 101.0709        | <b>129.0659</b> | 65.0366         | 112.0393        | 56.5233          |                 |                  | Q    |                 |                 |                 |                  |                |                  | 10 |
| 2  | 86.0964         | <b>242.1499</b> | 121.5786        | <b>225.1234</b> | 113.0653         |                 |                  | L    | <b>947.5156</b> | 474.2615        | 930.4891        | 465.7482         | 929.5051       | 465.2562         | 9  |
| 3  | 60.0444         | 329.1819        | 165.0946        | <b>312.1554</b> | 156.5813         | 311.1714        | 156.0893         | S    | <b>834.4316</b> | 417.7194        | <b>817.4050</b> | 409.2061         | 816.4210       | 408.7141         | 8  |
| 4  | 60.0444         | 416.2140        | 208.6106        | 399.1874        | 200.0974         | 398.2034        | 199.6053         | S    | <b>747.3995</b> | 374.2034        | 730.3730        | 365.6901         | 729.3890       | 365.1981         | 7  |
| 5  | 30.0338         | 473.2354        | 237.1214        | 456.2089        | 228.6081         | 455.2249        | 228.1161         | G    | <b>660.3675</b> | 330.6874        | 643.3410        | 322.1741         | 642.3570       | 321.6821         | 6  |
| 6  | 72.0808         | 572.3039        | 286.6556        | 555.2773        | 278.1423         | 554.2933        | 277.6503         | V    | <b>603.3461</b> | 302.1767        | 586.3195        | 293.6634         | 585.3355       | 293.1714         | 5  |
| 7  | 60.0444         | 659.3359        | 330.1716        | 642.3093        | 321.6583         | 641.3253        | 321.1663         | S    | <b>504.2776</b> | 252.6425        | 487.2511        | 244.1292         | 486.2671       | 243.6372         | 4  |
| 8  | 102.0550        | 788.3785        | 394.6929        | 771.3519        | 386.1796         | <b>770.3679</b> | 385.6876         | E    | 417.2456        | 209.1264        | 400.2191        | 200.6132         | 399.2350       | 200.1212         | 3  |
| 9  | 86.0964         | 901.4625        | 451.2349        | 884.4360        | 442.7216         | 883.4520        | 442.2296         | I    | <b>288.2030</b> | 144.6051        | 271.1765        | 136.0919         |                |                  | 2  |
| 10 | <b>129.1135</b> |                 |                 |                 |                  |                 |                  | R    | <b>175.1190</b> | 88.0631         | 158.0924        | 79.5498          |                |                  | 1  |

MS/MS Fragmentation of **NNPVMSLQDQVR**

Found in **Q7LGA3**, Q7LGA3|HS2ST\_HUMAN Heparan sulfate 2-O-sulfotransferase 1 OS=Homo sapiens  
GN=HS2ST1 PE=2 SV=1

Match to Query 369: 1415.659092 from(708.836822,2+)

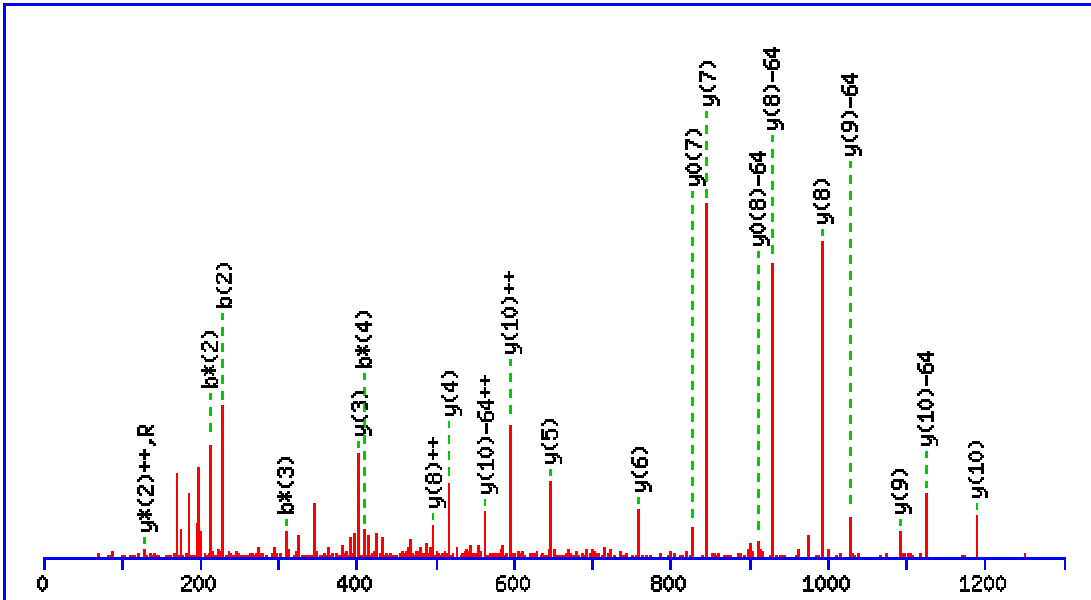

Monoisotopic mass of neutral peptide Mr(calc): 1415.6827

Fixed modifications: Carbamidomethyl (C)

Variable modifications:

M5 : Oxidation (M), with neutral losses 63.9983(shown in table), 0.0000

Ions Score: 58 Expect: 0.0001

Matches (Bold Red): 22/193 fragment ions using 26 most intense peaks

| #  | Immon.          | b               | b <sup>++</sup> | b <sup>*</sup>  | b <sup>*++</sup> | b <sup>0</sup> | b <sup>0++</sup> | Seq. | y                | y <sup>++</sup> | y <sup>*</sup> | y <sup>*++</sup> | y <sup>0</sup>  | y <sup>0++</sup> | #  |
|----|-----------------|-----------------|-----------------|-----------------|------------------|----------------|------------------|------|------------------|-----------------|----------------|------------------|-----------------|------------------|----|
| 1  | 87.0553         | 115.0502        | 58.0287         | 98.0237         | 49.5155          |                |                  | N    |                  |                 |                |                  |                 |                  | 12 |
| 2  | 87.0553         | <b>229.0931</b> | 115.0502        | <b>212.0666</b> | 106.5369         |                |                  | N    | 1238.6488        | 619.8280        | 1221.6222      | 611.3148         | 1220.6382       | 610.8227         | 11 |
| 3  | 70.0651         | 326.1459        | 163.5766        | <b>309.1193</b> | 155.0633         |                |                  | P    | <b>1124.6059</b> | <b>562.8066</b> | 1107.5793      | 554.2933         | 1106.5953       | 553.8013         | 10 |
| 4  | 72.0808         | 425.2143        | 213.1108        | <b>408.1878</b> | 204.5975         |                |                  | V    | <b>1027.5531</b> | 514.2802        | 1010.5265      | 505.7669         | 1009.5425       | 505.2749         | 9  |
| 5  | 56.0495         | 508.2514        | 254.6294        | 491.2249        | 246.1161         |                |                  | M    | <b>928.4847</b>  | 464.7460        | 911.4581       | 456.2327         | <b>910.4741</b> | 455.7407         | 8  |
| 6  | 60.0444         | 595.2835        | 298.1454        | 578.2569        | 289.6321         | 577.2729       | 289.1401         | S    | <b>845.4476</b>  | 423.2274        | 828.4210       | 414.7141         | <b>827.4370</b> | 414.2221         | 7  |
| 7  | 86.0964         | 708.3675        | 354.6874        | 691.3410        | 346.1741         | 690.3570       | 345.6821         | L    | <b>758.4155</b>  | 379.7114        | 741.3890       | 371.1981         | 740.4050        | 370.7061         | 6  |
| 8  | 101.0709        | 836.4261        | 418.7167        | 819.3995        | 410.2034         | 818.4155       | 409.7114         | Q    | <b>645.3315</b>  | 323.1694        | 628.3049       | 314.6561         | 627.3209        | 314.1641         | 5  |
| 9  | 88.0393         | 951.4530        | 476.2302        | 934.4265        | 467.7169         | 933.4425       | 467.2249         | D    | <b>517.2729</b>  | 259.1401        | 500.2463       | 250.6268         | 499.2623        | 250.1348         | 4  |
| 10 | 101.0709        | 1079.5116       | 540.2594        | 1062.4851       | 531.7462         | 1061.5011      | 531.2542         | Q    | <b>402.2459</b>  | 201.6266        | 385.2194       | 193.1133         |                 |                  | 3  |
| 11 | 72.0808         | 1178.5800       | 589.7937        | 1161.5535       | 581.2804         | 1160.5695      | 580.7884         | V    | 274.1874         | 137.5973        | 257.1608       | <b>129.0840</b>  |                 |                  | 2  |
| 12 | <b>129.1135</b> |                 |                 |                 |                  |                |                  | R    | 175.1190         | 88.0631         | 158.0924       | 79.5498          |                 |                  | 1  |

# MS/MS Fragmentation of **VLANPGNSQVAR**

Found in **Q14974**, Q14974|IMB1\_HUMAN Importin subunit beta-1 OS=Homo sapiens GN=KPNB1 PE=1 SV=2

Match to Query 203: 1224.482298 from(613.248425,2+)

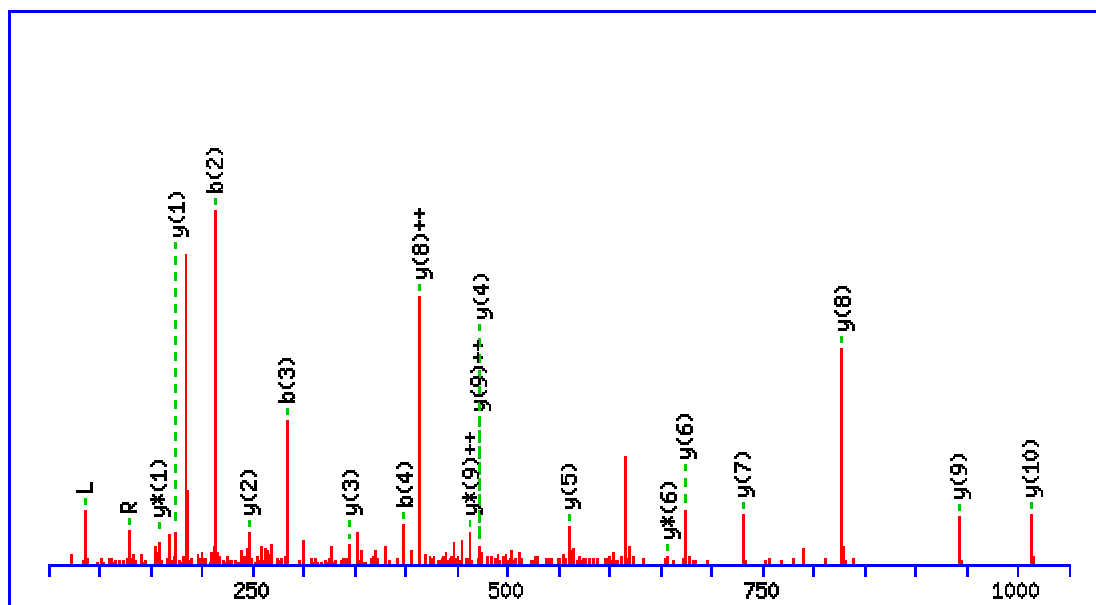

Monoisotopic mass of neutral peptide  $M_r(\text{calc})$ : 1224.6575

Fixed modifications: Carbamidomethyl (C)

Ions Score: 61 Expect: 5.5e-005

Matches (Bold Red): 20/116 fragment ions using 49 most intense peaks

| #  | Immon.          | b               | b <sup>++</sup> | b*        | b <sup>***</sup> | b <sup>0</sup> | b <sup>0++</sup> | Seq. | y                | y <sup>++</sup> | y*              | y <sup>***</sup> | y <sup>0</sup> | y <sup>0++</sup> | #  |
|----|-----------------|-----------------|-----------------|-----------|------------------|----------------|------------------|------|------------------|-----------------|-----------------|------------------|----------------|------------------|----|
| 1  | 72.0808         | 100.0757        | 50.5415         |           |                  |                |                  | V    |                  |                 |                 |                  |                |                  | 12 |
| 2  | <b>86.0964</b>  | <b>213.1598</b> | 107.0835        |           |                  |                |                  | L    | 1126.5963        | 563.8018        | 1109.5698       | 555.2885         | 1108.5858      | 554.7965         | 11 |
| 3  | 44.0495         | <b>284.1969</b> | 142.6021        |           |                  |                |                  | A    | <b>1013.5123</b> | 507.2598        | 996.4857        | 498.7465         | 995.5017       | 498.2545         | 10 |
| 4  | 87.0553         | <b>398.2398</b> | 199.6235        | 381.2132  | 191.1103         |                |                  | N    | <b>942.4752</b>  | <b>471.7412</b> | 925.4486        | <b>463.2279</b>  | 924.4646       | 462.7359         | 9  |
| 5  | 70.0651         | 495.2926        | 248.1499        | 478.2660  | 239.6366         |                |                  | P    | <b>828.4322</b>  | <b>414.7198</b> | 811.4057        | 406.2065         | 810.4217       | 405.7145         | 8  |
| 6  | 30.0338         | 552.3140        | 276.6606        | 535.2875  | 268.1474         |                |                  | G    | <b>731.3795</b>  | 366.1934        | 714.3529        | 357.6801         | 713.3689       | 357.1881         | 7  |
| 7  | 87.0553         | 666.3570        | 333.6821        | 649.3304  | 325.1688         |                |                  | N    | <b>674.3580</b>  | 337.6826        | <b>657.3315</b> | 329.1694         | 656.3474       | 328.6774         | 6  |
| 8  | 60.0444         | 753.3890        | 377.1981        | 736.3624  | 368.6849         | 735.3784       | 368.1928         | S    | <b>560.3151</b>  | 280.6612        | 543.2885        | 272.1479         | 542.3045       | 271.6559         | 5  |
| 9  | 101.0709        | 881.4476        | 441.2274        | 864.4210  | 432.7141         | 863.4370       | 432.2221         | Q    | <b>473.2831</b>  | 237.1452        | 456.2565        | 228.6319         |                |                  | 4  |
| 10 | 72.0808         | 980.5160        | 490.7616        | 963.4894  | 482.2483         | 962.5054       | 481.7563         | V    | <b>345.2245</b>  | 173.1159        | 328.1979        | 164.6026         |                |                  | 3  |
| 11 | 44.0495         | 1051.5531       | 526.2802        | 1034.5265 | 517.7669         | 1033.5425      | 517.2749         | A    | <b>246.1561</b>  | 123.5817        | 229.1295        | 115.0684         |                |                  | 2  |
| 12 | <b>129.1135</b> |                 |                 |           |                  |                |                  | R    | <b>175.1190</b>  | 88.0631         | <b>158.0924</b> | 79.5498          |                |                  | 1  |



MS/MS Fragmentation of **TVMPYISTTPAK**

Found in **P05556**, P05556|ITB1\_HUMAN Integrin beta-1 OS=Homo sapiens GN=ITGB1 PE=1 SV=1

Match to Query 586: 1323.632082 from(662.823317,2+)

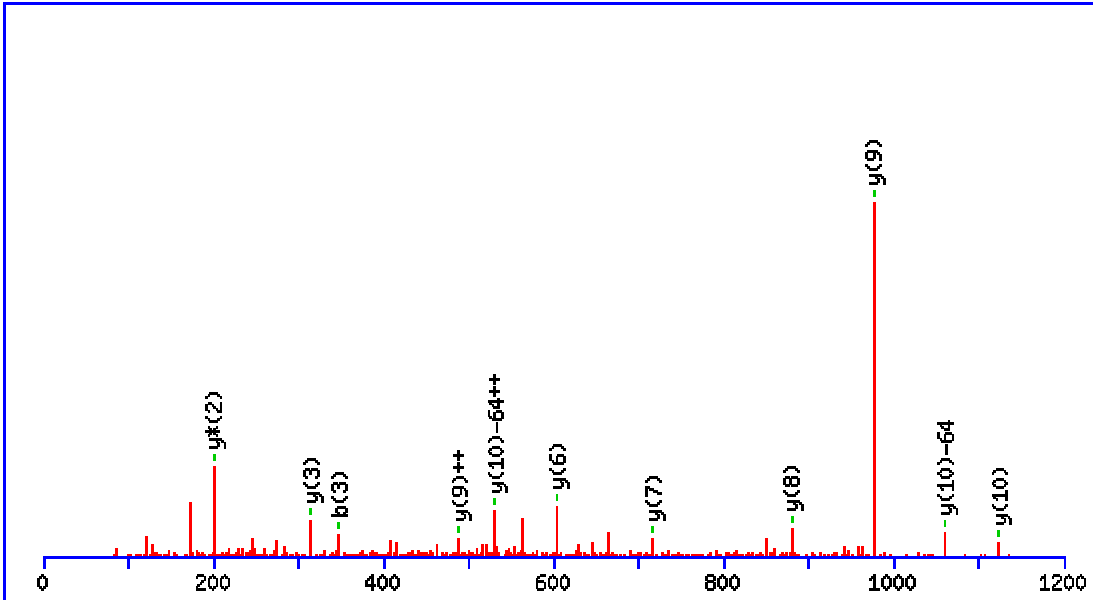

Monoisotopic mass of neutral peptide Mr(calc): 1323.6744

Fixed modifications: Carbamidomethyl (C)

Variable modifications:

M3 : Oxidation (M), with neutral losses 63.9983(shown in table), 0.0000

Ions Score: 48 Expect: 0.0012

Matches (Bold Red): 12/165 fragment ions using 14 most intense peaks

| #  | Immon.   | b               | b <sup>++</sup> | b <sup>0</sup> | b <sup>0++</sup> | Seq. | y                | y <sup>++</sup> | y <sup>*</sup>  | y <sup>*++</sup> | y <sup>0</sup> | y <sup>0++</sup> | #  |
|----|----------|-----------------|-----------------|----------------|------------------|------|------------------|-----------------|-----------------|------------------|----------------|------------------|----|
| 1  | 74.0600  | 102.0550        | 51.5311         | 84.0444        | 42.5258          | T    |                  |                 |                 |                  |                |                  | 12 |
| 2  | 72.0808  | <b>201.1234</b> | 101.0653        | 183.1128       | 92.0600          | V    | 1159.6358        | 580.3215        | 1142.6092       | 571.8082         | 1141.6252      | 571.3162         | 11 |
| 3  | 56.0495  | 284.1605        | 142.5839        | 266.1499       | 133.5786         | M    | <b>1060.5673</b> | <b>530.7873</b> | 1043.5408       | 522.2740         | 1042.5568      | 521.7820         | 10 |
| 4  | 70.0651  | 381.2133        | 191.1103        | 363.2027       | 182.1050         | P    | <b>977.5302</b>  | <b>489.2688</b> | 960.5037        | 480.7555         | 959.5197       | 480.2635         | 9  |
| 5  | 136.0757 | 544.2766        | 272.6419        | 526.2660       | 263.6366         | Y    | <b>880.4775</b>  | 440.7424        | 863.4509        | 432.2291         | 862.4669       | 431.7371         | 8  |
| 6  | 86.0964  | 657.3606        | 329.1840        | 639.3501       | 320.1787         | I    | <b>717.4141</b>  | 359.2107        | 700.3876        | 350.6974         | 699.4036       | 350.2054         | 7  |
| 7  | 60.0444  | 744.3927        | 372.7000        | 726.3821       | 363.6947         | S    | <b>604.3301</b>  | 302.6687        | 587.3035        | 294.1554         | 586.3195       | 293.6634         | 6  |
| 8  | 74.0600  | 845.4404        | 423.2238        | 827.4298       | 414.2185         | T    | 517.2980         | 259.1527        | 500.2715        | 250.6394         | 499.2875       | 250.1474         | 5  |
| 9  | 74.0600  | 946.4880        | 473.7477        | 928.4775       | 464.7424         | T    | 416.2504         | 208.6288        | 399.2238        | 200.1155         | 398.2398       | 199.6235         | 4  |
| 10 | 70.0651  | 1043.5408       | 522.2740        | 1025.5302      | 513.2688         | P    | <b>315.2027</b>  | 158.1050        | 298.1761        | 149.5917         |                |                  | 3  |
| 11 | 44.0495  | 1114.5779       | 557.7926        | 1096.5673      | 548.7873         | A    | 218.1499         | 109.5786        | <b>201.1234</b> | 101.0653         |                |                  | 2  |
| 12 | 101.1073 |                 |                 |                |                  | K    | 147.1128         | 74.0600         | 130.0863        | 65.5468          |                |                  | 1  |

MS/MS Fragmentation of **VSDATGQMNLTK**

Found in **P40121**, P40121|CAPG\_HUMAN Macrophage-capping protein OS=Homo sapiens GN=CAPG PE=1 SV=1

Match to Query 312: 1279.748650 from(640.881601,2+)

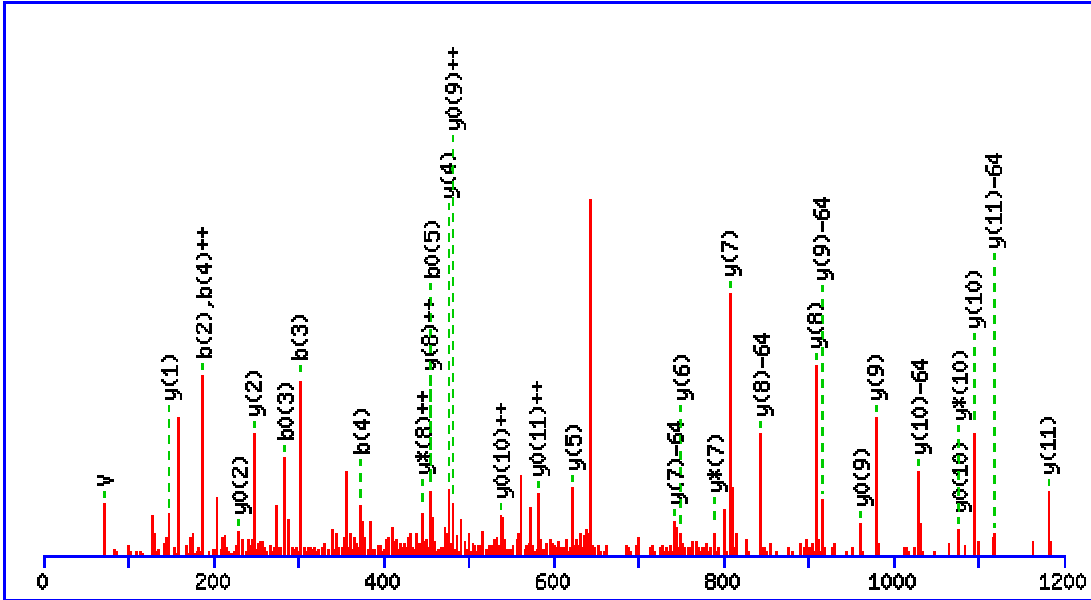

Monoisotopic mass of neutral peptide Mr(calc): 1279.6078

Fixed modifications: Carbamidomethyl (C)

Variable modifications:

**M8** : Oxidation (M), with neutral losses 0.0000(shown in table), 63.9983

Ions Score: 69 Expect: 8.8e-006

Matches (Bold Red): 32/195 fragment ions using 50 most intense peaks

| #  | Immon.         | b               | b <sup>++</sup> | b <sup>*</sup> | b <sup>*++</sup> | b <sup>0</sup>  | b <sup>0++</sup> | Seq. | y                | y <sup>++</sup> | y <sup>*</sup>   | y <sup>*++</sup> | y <sup>0</sup>   | y <sup>0++</sup> | #  |
|----|----------------|-----------------|-----------------|----------------|------------------|-----------------|------------------|------|------------------|-----------------|------------------|------------------|------------------|------------------|----|
| 1  | <b>72.0808</b> | 100.0757        | 50.5415         |                |                  |                 |                  | V    |                  |                 |                  |                  |                  |                  | 12 |
| 2  | 60.0444        | <b>187.1077</b> | 94.0575         |                |                  | 169.0972        | 85.0522          | S    | <b>1181.5467</b> | 591.2770        | 1164.5201        | 582.7637         | 1163.5361        | <b>582.2717</b>  | 11 |
| 3  | 88.0393        | <b>302.1347</b> | 151.5710        |                |                  | <b>284.1241</b> | 142.5657         | D    | <b>1094.5147</b> | 547.7610        | <b>1077.4881</b> | 539.2477         | <b>1076.5041</b> | <b>538.7557</b>  | 10 |
| 4  | 44.0495        | <b>373.1718</b> | <b>187.0895</b> |                |                  | 355.1612        | 178.0842         | A    | <b>979.4877</b>  | 490.2475        | 962.4612         | 481.7342         | <b>961.4771</b>  | <b>481.2422</b>  | 9  |
| 5  | 74.0600        | 474.2195        | 237.6134        |                |                  | <b>456.2089</b> | 228.6081         | T    | <b>908.4506</b>  | <b>454.7289</b> | 891.4240         | <b>446.2157</b>  | 890.4400         | 445.7237         | 8  |
| 6  | 30.0338        | 531.2409        | 266.1241        |                |                  | 513.2304        | 257.1188         | G    | <b>807.4029</b>  | 404.2051        | <b>790.3764</b>  | 395.6918         | 789.3924         | 395.1998         | 7  |
| 7  | 101.0709       | 659.2995        | 330.1534        | 642.2729       | 321.6401         | 641.2889        | 321.1481         | Q    | <b>750.3815</b>  | 375.6944        | 733.3549         | 367.1811         | 732.3709         | 366.6891         | 6  |
| 8  | 120.0478       | 806.3349        | 403.6711        | 789.3084       | 395.1578         | 788.3243        | 394.6658         | M    | <b>622.3229</b>  | 311.6651        | 605.2963         | 303.1518         | 604.3123         | 302.6598         | 5  |
| 9  | 87.0553        | 920.3778        | 460.6926        | 903.3513       | 452.1793         | 902.3673        | 451.6873         | N    | <b>475.2875</b>  | 238.1474        | 458.2609         | 229.6341         | 457.2769         | 229.1421         | 4  |
| 10 | 86.0964        | 1033.4619       | 517.2346        | 1016.4353      | 508.7213         | 1015.4513       | 508.2293         | L    | 361.2445         | 181.1259        | 344.2180         | 172.6126         | 343.2340         | 172.1206         | 3  |
| 11 | 74.0600        | 1134.5096       | 567.7584        | 1117.4830      | 559.2451         | 1116.4990       | 558.7531         | T    | <b>248.1605</b>  | 124.5839        | 231.1339         | 116.0706         | <b>230.1499</b>  | 115.5786         | 2  |
| 12 | 101.1073       |                 |                 |                |                  |                 |                  | K    | <b>147.1128</b>  | 74.0600         | 130.0863         | 65.5468          |                  |                  | 1  |

MS/MS Fragmentation of **LGVTANDVK**

Found in **P40925**, P40925|MDHC\_HUMAN Malate dehydrogenase, cytoplasmic OS=Homo sapiens  
GN=MDH1 PE=1 SV=4

Match to Query 163: 915.506216 from(458.760384,2+)

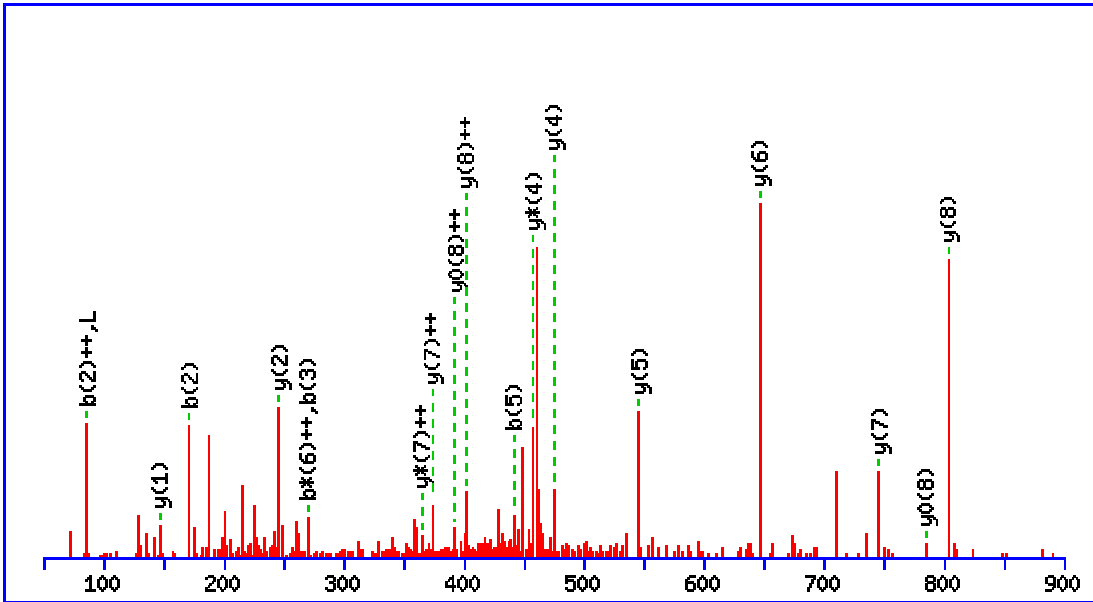

Monoisotopic mass of neutral peptide Mr(calc): 915.5025

Fixed modifications: Carbamidomethyl (C)

Ions Score: 38 Expect: 0.015

Matches (Bold Red): 19/85 fragment ions using 46 most intense peaks

| # | Immon.         | b               | b <sup>++</sup> | b <sup>*</sup> | b <sup>*++</sup> | b <sup>0</sup> | b <sup>0++</sup> | Seq. | y               | y <sup>++</sup> | y <sup>*</sup>  | y <sup>*++</sup> | y <sup>0</sup>  | y <sup>0++</sup> | # |
|---|----------------|-----------------|-----------------|----------------|------------------|----------------|------------------|------|-----------------|-----------------|-----------------|------------------|-----------------|------------------|---|
| 1 | <b>86.0964</b> | 114.0913        | 57.5493         |                |                  |                |                  | L    |                 |                 |                 |                  |                 |                  | 9 |
| 2 | 30.0338        | <b>171.1128</b> | <b>86.0600</b>  |                |                  |                |                  | G    | <b>803.4258</b> | <b>402.2165</b> | 786.3992        | 393.7032         | <b>785.4152</b> | <b>393.2112</b>  | 8 |
| 3 | 72.0808        | <b>270.1812</b> | 135.5942        |                |                  |                |                  | V    | <b>746.4043</b> | <b>373.7058</b> | 729.3777        | <b>365.1925</b>  | 728.3937        | 364.7005         | 7 |
| 4 | 74.0600        | 371.2289        | 186.1181        |                |                  | 353.2183       | 177.1128         | T    | <b>647.3359</b> | 324.1716        | 630.3093        | 315.6583         | 629.3253        | 315.1663         | 6 |
| 5 | 44.0495        | <b>442.2660</b> | 221.6366        |                |                  | 424.2554       | 212.6314         | A    | <b>546.2882</b> | 273.6477        | 529.2617        | 265.1345         | 528.2776        | 264.6425         | 5 |
| 6 | 87.0553        | 556.3089        | 278.6581        | 539.2824       | <b>270.1448</b>  | 538.2984       | 269.6528         | N    | <b>475.2511</b> | 238.1292        | <b>458.2245</b> | 229.6159         | 457.2405        | 229.1239         | 4 |
| 7 | 88.0393        | 671.3359        | 336.1716        | 654.3093       | 327.6583         | 653.3253       | 327.1663         | D    | 361.2082        | 181.1077        | 344.1816        | 172.5944         | 343.1976        | 172.1024         | 3 |
| 8 | 72.0808        | 770.4043        | 385.7058        | 753.3777       | 377.1925         | 752.3937       | 376.7005         | V    | <b>246.1812</b> | 123.5942        | 229.1547        | 115.0810         |                 |                  | 2 |
| 9 | 101.1073       |                 |                 |                |                  |                |                  | K    | <b>147.1128</b> | 74.0600         | 130.0863        | 65.5468          |                 |                  | 1 |

MS/MS Fragmentation of **LDLLEDR**

Found in **Q14697**, Q14697|GANAB\_HUMAN Neutral alpha-glucosidase AB OS=Homo sapiens GN=GANAB PE=1 SV=3

Match to Query 158: 872.429132 from(437.221842,2+)

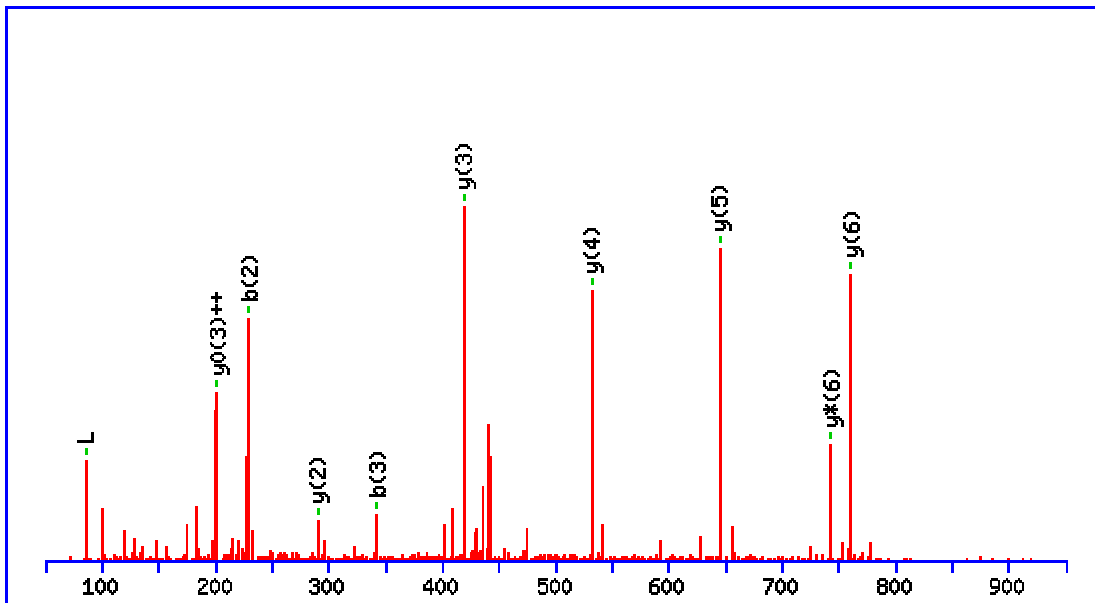

Monoisotopic mass of neutral peptide **Mr(calc):** 872.4603

**Fixed modifications:** Carbamidomethyl (C)

**Ions Score:** 36 **Expect:** 0.024

**Matches (Bold Red):** 12/63 fragment ions using 22 most intense peaks

| # | Immon.         | b               | b <sup>++</sup> | b <sup>0</sup> | b <sup>0++</sup> | Seq. | y               | y <sup>++</sup> | y <sup>*</sup>  | y <sup>*++</sup> | y <sup>0</sup> | y <sup>0++</sup> | # |
|---|----------------|-----------------|-----------------|----------------|------------------|------|-----------------|-----------------|-----------------|------------------|----------------|------------------|---|
| 1 | <b>86.0964</b> | 114.0913        | 57.5493         |                |                  | L    |                 |                 |                 |                  |                |                  | 7 |
| 2 | 88.0393        | <b>229.1183</b> | 115.0628        | 211.1077       | 106.0575         | D    | <b>760.3836</b> | 380.6954        | <b>743.3570</b> | 372.1821         | 742.3730       | 371.6901         | 6 |
| 3 | <b>86.0964</b> | <b>342.2023</b> | 171.6048        | 324.1918       | 162.5995         | L    | <b>645.3566</b> | 323.1819        | 628.3301        | 314.6687         | 627.3461       | 314.1767         | 5 |
| 4 | <b>86.0964</b> | 455.2864        | 228.1468        | 437.2758       | 219.1416         | L    | <b>532.2726</b> | 266.6399        | 515.2460        | 258.1266         | 514.2620       | 257.6346         | 4 |
| 5 | 102.0550       | 584.3290        | 292.6681        | 566.3184       | 283.6629         | E    | <b>419.1885</b> | 210.0979        | 402.1619        | 201.5846         | 401.1779       | <b>201.0926</b>  | 3 |
| 6 | 88.0393        | 699.3559        | 350.1816        | 681.3454       | 341.1763         | D    | <b>290.1459</b> | 145.5766        | 273.1193        | 137.0633         | 272.1353       | 136.5713         | 2 |
| 7 | 129.1135       |                 |                 |                |                  | R    | 175.1190        | 88.0631         | 158.0924        | 79.5498          |                |                  | 1 |

MS/MS Fragmentation of **ALADVATVLGR**

Found in **Q92542**, Q92542|NICA\_HUMAN Nicastrin OS=Homo sapiens GN=NCSTN PE=1 SV=2

Match to Query 205: 1084.462440 from(543.238496,2+)

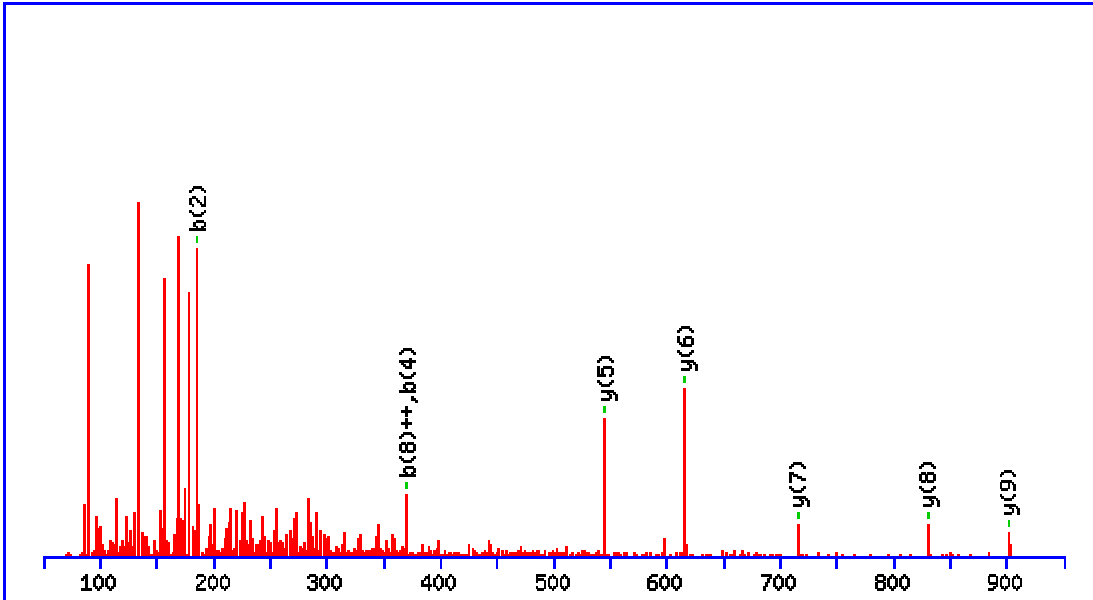

Monoisotopic mass of neutral peptide  $M_r(\text{calc})$ : 1084.6241

Fixed modifications: Carbamidomethyl (C)

Ions Score: 37 Expect: 0.017

Matches (**Bold Red**): 8/97 fragment ions using 10 most intense peaks

| #  | Immon.   | b               | b <sup>++</sup> | b <sup>0</sup> | b <sup>0++</sup> | Seq. | y               | y <sup>++</sup> | y <sup>*</sup> | y <sup>*++</sup> | y <sup>0</sup> | y <sup>0++</sup> | #  |
|----|----------|-----------------|-----------------|----------------|------------------|------|-----------------|-----------------|----------------|------------------|----------------|------------------|----|
| 1  | 44.0495  | 72.0444         | 36.5258         |                |                  | A    |                 |                 |                |                  |                |                  | 11 |
| 2  | 86.0964  | <b>185.1285</b> | 93.0679         |                |                  | L    | 1014.5942       | 507.8007        | 997.5677       | 499.2875         | 996.5837       | 498.7955         | 10 |
| 3  | 44.0495  | 256.1656        | 128.5864        |                |                  | A    | <b>901.5102</b> | 451.2587        | 884.4836       | 442.7454         | 883.4996       | 442.2534         | 9  |
| 4  | 88.0393  | <b>371.1925</b> | 186.0999        | 353.1819       | 177.0946         | D    | <b>830.4730</b> | 415.7402        | 813.4465       | 407.2269         | 812.4625       | 406.7349         | 8  |
| 5  | 72.0808  | 470.2609        | 235.6341        | 452.2504       | 226.6288         | V    | <b>715.4461</b> | 358.2267        | 698.4196       | 349.7134         | 697.4355       | 349.2214         | 7  |
| 6  | 44.0495  | 541.2980        | 271.1527        | 523.2875       | 262.1474         | A    | <b>616.3777</b> | 308.6925        | 599.3511       | 300.1792         | 598.3671       | 299.6872         | 6  |
| 7  | 74.0600  | 642.3457        | 321.6765        | 624.3352       | 312.6712         | T    | <b>545.3406</b> | 273.1739        | 528.3140       | 264.6607         | 527.3300       | 264.1686         | 5  |
| 8  | 72.0808  | 741.4141        | <b>371.2107</b> | 723.4036       | 362.2054         | V    | 444.2929        | 222.6501        | 427.2663       | 214.1368         |                |                  | 4  |
| 9  | 86.0964  | 854.4982        | 427.7527        | 836.4876       | 418.7475         | L    | 345.2245        | 173.1159        | 328.1979       | 164.6026         |                |                  | 3  |
| 10 | 30.0338  | 911.5197        | 456.2635        | 893.5091       | 447.2582         | G    | 232.1404        | 116.5738        | 215.1139       | 108.0606         |                |                  | 2  |
| 11 | 129.1135 |                 |                 |                |                  | R    | 175.1190        | 88.0631         | 158.0924       | 79.5498          |                |                  | 1  |

MS/MS Fragmentation of **ALMDEVVK**

Found in **P00558**, P00558|PGK1\_HUMAN Phosphoglycerate kinase 1 OS=Homo sapiens GN=PGK1 PE=1 SV=3

Match to Query 140: 919.483968 from(460.749260,2+)

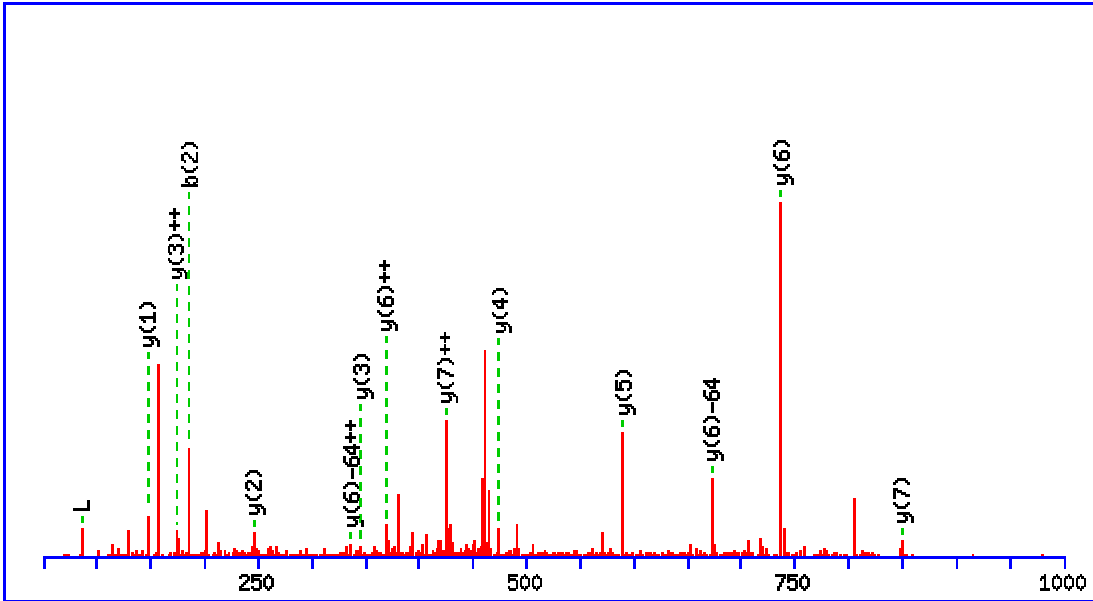

**Monoisotopic mass of neutral peptide Mr(calc):** 919.4685

**Fixed modifications:** Carbamidomethyl (C)

**Variable modifications:**

**M3** : Oxidation (M), with neutral losses 0.0000(shown in table), 63.9983

**Ions Score:** 38 **Expect:** 0.012

**Matches (Bold Red):** 14/97 fragment ions using 38 most intense peaks

| # | Immon.         | b               | b <sup>++</sup> | b <sup>0</sup> | b <sup>0++</sup> | Seq. | y               | y <sup>++</sup> | y <sup>*</sup> | y <sup>*++</sup> | y <sup>0</sup> | y <sup>0++</sup> | # |
|---|----------------|-----------------|-----------------|----------------|------------------|------|-----------------|-----------------|----------------|------------------|----------------|------------------|---|
| 1 | 44.0495        | 72.0444         | 36.5258         |                |                  | A    |                 |                 |                |                  |                |                  | 8 |
| 2 | <b>86.0964</b> | <b>185.1285</b> | 93.0679         |                |                  | L    | <b>849.4386</b> | <b>425.2230</b> | 832.4121       | 416.7097         | 831.4281       | 416.2177         | 7 |
| 3 | 120.0478       | 332.1639        | 166.5856        |                |                  | M    | <b>736.3546</b> | <b>368.6809</b> | 719.3280       | 360.1676         | 718.3440       | 359.6756         | 6 |
| 4 | 88.0393        | 447.1908        | 224.0990        | 429.1802       | 215.0938         | D    | <b>589.3192</b> | 295.1632        | 572.2926       | 286.6499         | 571.3086       | 286.1579         | 5 |
| 5 | 102.0550       | 576.2334        | 288.6203        | 558.2228       | 279.6151         | E    | <b>474.2922</b> | 237.6498        | 457.2657       | 229.1365         | 456.2817       | 228.6445         | 4 |
| 6 | 72.0808        | 675.3018        | 338.1545        | 657.2912       | 329.1493         | V    | <b>345.2496</b> | <b>173.1285</b> | 328.2231       | 164.6152         |                |                  | 3 |
| 7 | 72.0808        | 774.3702        | 387.6887        | 756.3597       | 378.6835         | V    | <b>246.1812</b> | 123.5942        | 229.1547       | 115.0810         |                |                  | 2 |
| 8 | 101.1073       |                 |                 |                |                  | K    | <b>147.1128</b> | 74.0600         | 130.0863       | 65.5468          |                |                  | 1 |

MS/MS Fragmentation of **STPVNVPISQK**

Found in **Q8WUM4**, Q8WUM4|PDC6L\_HUMAN Programmed cell death 6-interacting protein OS=Homo sapiens GN=PDC6IP PE=1 SV=1

Match to Query 527: 1168.607770 from(585.311161,2+)

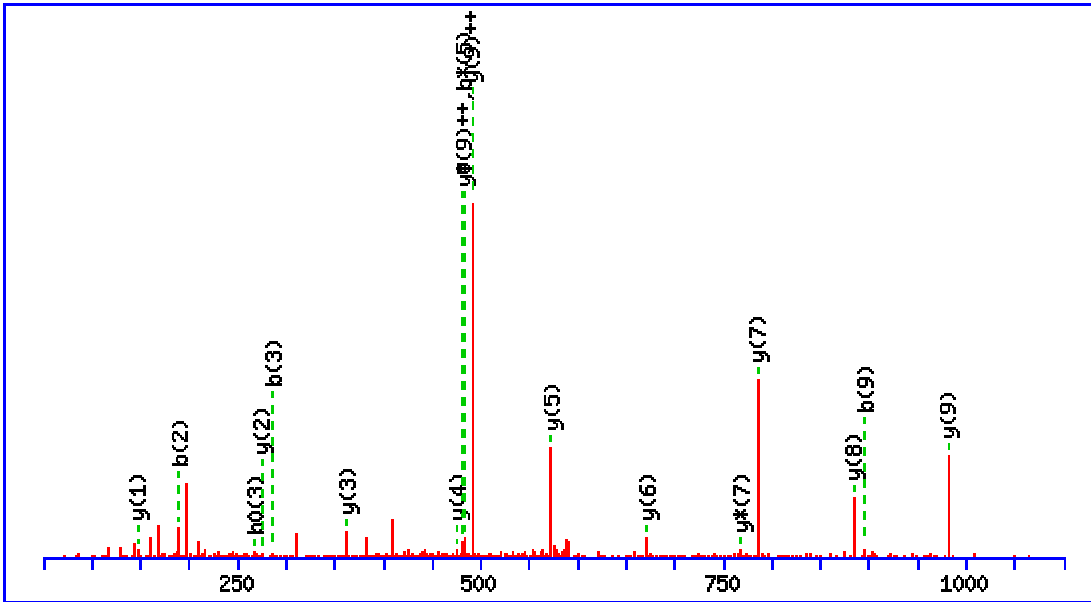

Monoisotopic mass of neutral peptide Mr(calc): 1168.6452

Fixed modifications: Carbamidomethyl (C)

Ions Score: 39 Expect: 0.0084

Matches (Bold Red): 18/119 fragment ions using 61 most intense peaks

| #  | Immon.   | b               | b <sup>++</sup> | b*              | b <sup>*++</sup> | b <sup>0</sup>  | b <sup>0++</sup> | Seq. | y               | y <sup>++</sup> | y*              | y <sup>*++</sup> | y <sup>0</sup> | y <sup>0++</sup> | #  |
|----|----------|-----------------|-----------------|-----------------|------------------|-----------------|------------------|------|-----------------|-----------------|-----------------|------------------|----------------|------------------|----|
| 1  | 60.0444  | 88.0393         | 44.5233         |                 |                  | 70.0287         | 35.5180          | S    |                 |                 |                 |                  |                |                  | 11 |
| 2  | 74.0600  | <b>189.0870</b> | 95.0471         |                 |                  | 171.0764        | 86.0418          | T    | 1082.6204       | 541.8139        | 1065.5939       | 533.3006         | 1064.6099      | 532.8086         | 10 |
| 3  | 70.0651  | <b>286.1397</b> | 143.5735        |                 |                  | <b>268.1292</b> | 134.5682         | P    | <b>981.5728</b> | <b>491.2900</b> | 964.5462        | <b>482.7767</b>  | 963.5622       | <b>482.2847</b>  | 9  |
| 4  | 72.0808  | 385.2082        | 193.1077        |                 |                  | 367.1976        | 184.1024         | V    | <b>884.5200</b> | 442.7636        | 867.4934        | 434.2504         | 866.5094       | 433.7584         | 8  |
| 5  | 87.0553  | 499.2511        | 250.1292        | <b>482.2245</b> | 241.6159         | 481.2405        | 241.1239         | N    | <b>785.4516</b> | 393.2294        | <b>768.4250</b> | 384.7162         | 767.4410       | 384.2241         | 7  |
| 6  | 72.0808  | 598.3195        | 299.6634        | 581.2930        | 291.1501         | 580.3089        | 290.6581         | V    | <b>671.4087</b> | 336.2080        | 654.3821        | 327.6947         | 653.3981       | 327.2027         | 6  |
| 7  | 70.0651  | 695.3723        | 348.1898        | 678.3457        | 339.6765         | 677.3617        | 339.1845         | P    | <b>572.3402</b> | 286.6738        | 555.3137        | 278.1605         | 554.3297       | 277.6685         | 5  |
| 8  | 86.0964  | 808.4563        | 404.7318        | 791.4298        | 396.2185         | 790.4458        | 395.7265         | I    | <b>475.2875</b> | 238.1474        | 458.2609        | 229.6341         | 457.2769       | 229.1421         | 4  |
| 9  | 60.0444  | <b>895.4884</b> | 448.2478        | 878.4618        | 439.7345         | 877.4778        | 439.2425         | S    | <b>362.2034</b> | 181.6053        | 345.1769        | 173.0921         | 344.1928       | 172.6001         | 3  |
| 10 | 101.0709 | 1023.5469       | 512.2771        | 1006.5204       | 503.7638         | 1005.5364       | 503.2718         | Q    | <b>275.1714</b> | 138.0893        | 258.1448        | 129.5761         |                |                  | 2  |
| 11 | 101.1073 |                 |                 |                 |                  |                 |                  | K    | <b>147.1128</b> | 74.0600         | 130.0863        | 65.5468          |                |                  | 1  |

MS/MS Fragmentation of **FDAGELITQR**

Found in **P35232**, P35232|PHB\_HUMAN Prohibitin OS=Homo sapiens GN=PHB PE=1 SV=1

Match to Query 279: 1148.534592 from(575.274572,2+)

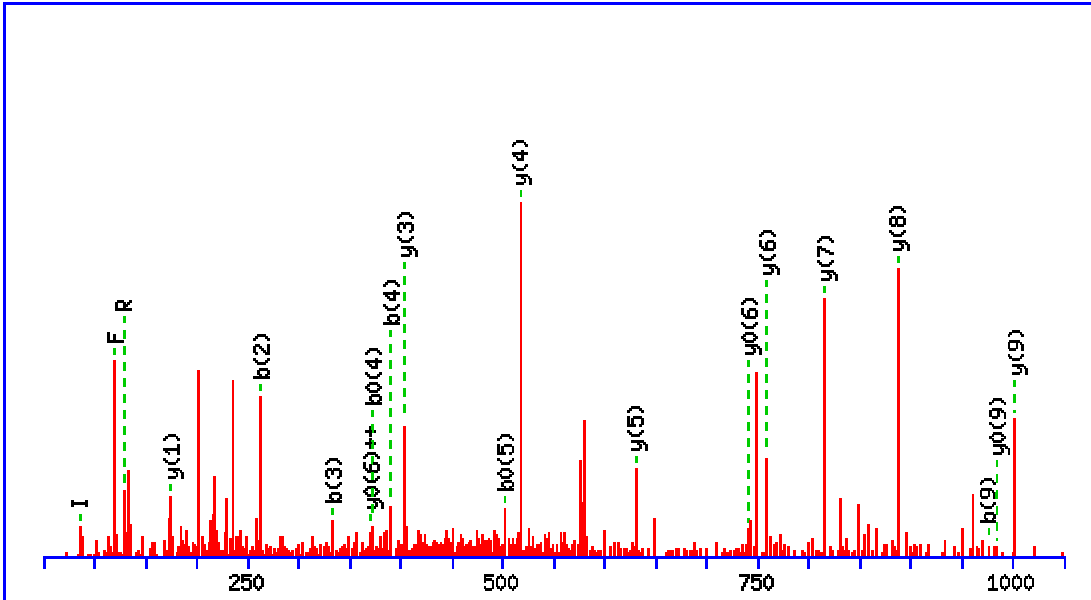

Monoisotopic mass of neutral peptide  $M_r(\text{calc})$ : 1148.5826

Fixed modifications: Carbamidomethyl (C)

Ions Score: 39 Expect: 0.0094

Matches (**Bold Red**): 21/96 fragment ions using 54 most intense peaks

| #  | Immon.          | b               | b <sup>++</sup> | b*       | b <sup>+++</sup> | b <sup>0</sup>  | b <sup>0++</sup> | Seq. | y                | y <sup>++</sup> | y*       | y <sup>+++</sup> | y <sup>0</sup>  | y <sup>0++</sup> | #  |
|----|-----------------|-----------------|-----------------|----------|------------------|-----------------|------------------|------|------------------|-----------------|----------|------------------|-----------------|------------------|----|
| 1  | <b>120.0808</b> | 148.0757        | 74.5415         |          |                  |                 |                  | F    |                  |                 |          |                  |                 |                  | 10 |
| 2  | 88.0393         | <b>263.1026</b> | 132.0550        |          |                  | 245.0921        | 123.0497         | D    | <b>1002.5215</b> | 501.7644        | 985.4949 | 493.2511         | <b>984.5109</b> | 492.7591         | 9  |
| 3  | 44.0495         | <b>334.1397</b> | 167.5735        |          |                  | 316.1292        | 158.5682         | A    | <b>887.4945</b>  | 444.2509        | 870.4680 | 435.7376         | 869.4839        | 435.2456         | 8  |
| 4  | 30.0338         | <b>391.1612</b> | 196.0842        |          |                  | <b>373.1506</b> | 187.0790         | G    | <b>816.4574</b>  | 408.7323        | 799.4308 | 400.2191         | 798.4468        | 399.7271         | 7  |
| 5  | 102.0550        | 520.2038        | 260.6055        |          |                  | <b>502.1932</b> | 251.6003         | E    | <b>759.4359</b>  | 380.2216        | 742.4094 | 371.7083         | <b>741.4254</b> | <b>371.2163</b>  | 6  |
| 6  | <b>86.0964</b>  | 633.2879        | 317.1476        |          |                  | 615.2773        | 308.1423         | L    | <b>630.3933</b>  | 315.7003        | 613.3668 | 307.1870         | 612.3828        | 306.6950         | 5  |
| 7  | <b>86.0964</b>  | 746.3719        | 373.6896        |          |                  | 728.3614        | 364.6843         | I    | <b>517.3093</b>  | 259.1583        | 500.2827 | 250.6450         | 499.2987        | 250.1530         | 4  |
| 8  | 74.0600         | 847.4196        | 424.2134        |          |                  | 829.4090        | 415.2082         | T    | <b>404.2252</b>  | 202.6162        | 387.1987 | 194.1030         | 386.2146        | 193.6110         | 3  |
| 9  | 101.0709        | <b>975.4782</b> | 488.2427        | 958.4516 | 479.7295         | 957.4676        | 479.2375         | Q    | 303.1775         | 152.0924        | 286.1510 | 143.5791         |                 |                  | 2  |
| 10 | <b>129.1135</b> |                 |                 |          |                  |                 |                  | R    | <b>175.1190</b>  | 88.0631         | 158.0924 | 79.5498          |                 |                  | 1  |



MS/MS Fragmentation of **FNASQLITQR**

Found in **Q99623**, Q99623|PHB2\_HUMAN Prohibitin-2 OS=Homo sapiens GN=PHB2 PE=1 SV=2

Match to Query 469: 1176.597604 from(589.306078,2+)

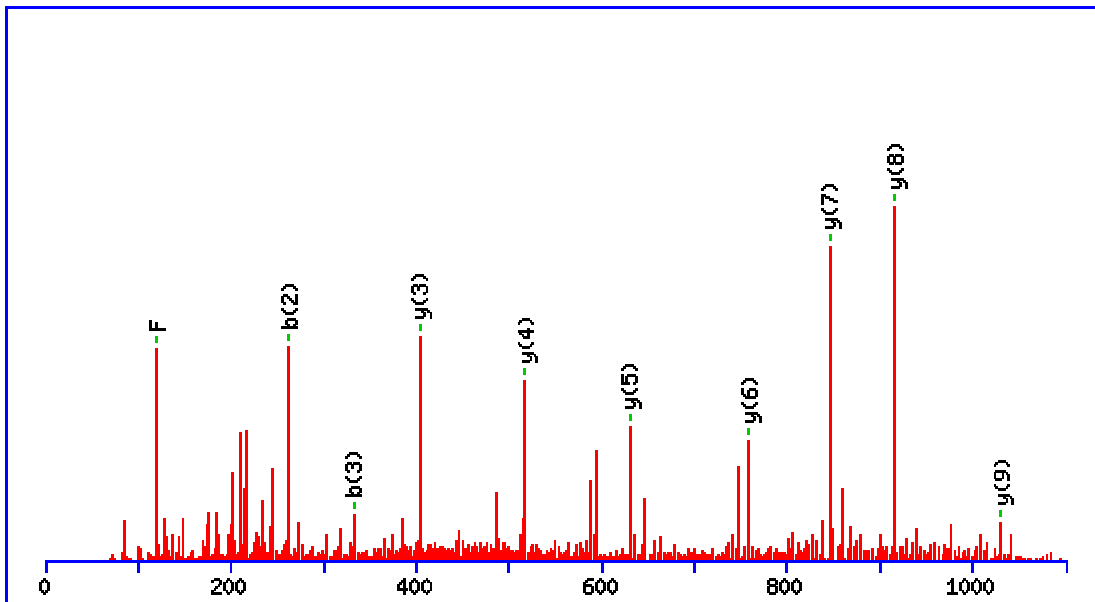

Monoisotopic mass of neutral peptide  $M_r(\text{calc})$ : 1176.6251

Fixed modifications: Carbamidomethyl (C)

Ions Score: 69 Expect: 1e-005

Matches (**Bold Red**): 10/106 fragment ions using 12 most intense peaks

| #  | Immon.          | b               | b <sup>++</sup> | b*       | b <sup>*++</sup> | b <sup>0</sup> | b <sup>0++</sup> | Seq. | y                | y <sup>++</sup> | y*        | y <sup>*++</sup> | y <sup>0</sup> | y <sup>0++</sup> | #  |
|----|-----------------|-----------------|-----------------|----------|------------------|----------------|------------------|------|------------------|-----------------|-----------|------------------|----------------|------------------|----|
| 1  | <b>120.0808</b> | 148.0757        | 74.5415         |          |                  |                |                  | F    |                  |                 |           |                  |                |                  | 10 |
| 2  | 87.0553         | <b>262.1186</b> | 131.5629        | 245.0921 | 123.0497         |                |                  | N    | <b>1030.5640</b> | 515.7856        | 1013.5374 | 507.2724         | 1012.5534      | 506.7803         | 9  |
| 3  | 44.0495         | <b>333.1557</b> | 167.0815        | 316.1292 | 158.5682         |                |                  | A    | <b>916.5211</b>  | 458.7642        | 899.4945  | 450.2509         | 898.5105       | 449.7589         | 8  |
| 4  | 60.0444         | 420.1878        | 210.5975        | 403.1612 | 202.0842         | 402.1772       | 201.5922         | S    | <b>845.4839</b>  | 423.2456        | 828.4574  | 414.7323         | 827.4734       | 414.2403         | 7  |
| 5  | 101.0709        | 548.2463        | 274.6268        | 531.2198 | 266.1135         | 530.2358       | 265.6215         | Q    | <b>758.4519</b>  | 379.7296        | 741.4254  | 371.2163         | 740.4414       | 370.7243         | 6  |
| 6  | 86.0964         | 661.3304        | 331.1688        | 644.3039 | 322.6556         | 643.3198       | 322.1636         | L    | <b>630.3933</b>  | 315.7003        | 613.3668  | 307.1870         | 612.3828       | 306.6950         | 5  |
| 7  | 86.0964         | 774.4145        | 387.7109        | 757.3879 | 379.1976         | 756.4039       | 378.7056         | I    | <b>517.3093</b>  | 259.1583        | 500.2827  | 250.6450         | 499.2987       | 250.1530         | 4  |
| 8  | 74.0600         | 875.4621        | 438.2347        | 858.4356 | 429.7214         | 857.4516       | 429.2294         | T    | <b>404.2252</b>  | 202.6162        | 387.1987  | 194.1030         | 386.2146       | 193.6110         | 3  |
| 9  | 101.0709        | 1003.5207       | 502.2640        | 986.4942 | 493.7507         | 985.5102       | 493.2587         | Q    | 303.1775         | 152.0924        | 286.1510  | 143.5791         |                |                  | 2  |
| 10 | 129.1135        |                 |                 |          |                  |                |                  | R    | 175.1190         | 88.0631         | 158.0924  | 79.5498          |                |                  | 1  |

MS/MS Fragmentation of **SEPIPESNDGPVK**

Found in **P30101**, P30101|PDIA3\_HUMAN Protein disulfide-isomerase A3 OS=Homo sapiens GN=PDIA3 PE=1 SV=4

Match to Query 389: 1367.737476 from(684.876014,2+)

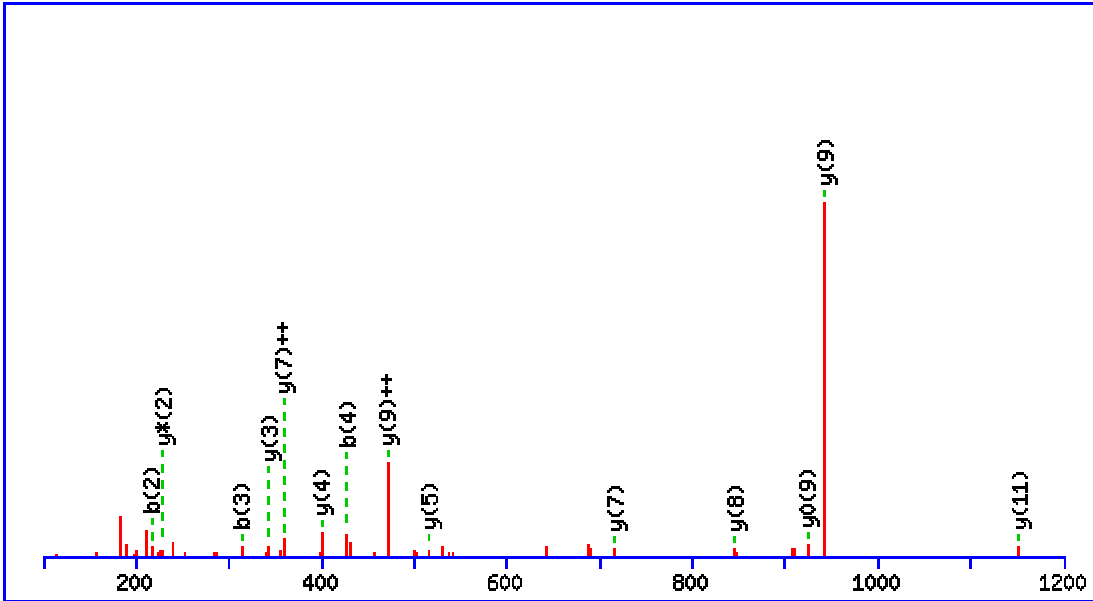

**Monoisotopic mass of neutral peptide Mr(calc):** 1367.6569

**Fixed modifications:** Carbamidomethyl (C)

**Ions Score:** 32 **Expect:** 0.043

**Matches (Bold Red):** 14/135 fragment ions using 36 most intense peaks

| #  | Immon.   | b               | b <sup>++</sup> | b <sup>*</sup> | b <sup>*++</sup> | b <sup>0</sup> | b <sup>0++</sup> | Seq. | y                | y <sup>++</sup> | y <sup>*</sup>  | y <sup>*++</sup> | y <sup>0</sup>  | y <sup>0++</sup> | #  |
|----|----------|-----------------|-----------------|----------------|------------------|----------------|------------------|------|------------------|-----------------|-----------------|------------------|-----------------|------------------|----|
| 1  | 60.0444  | 88.0393         | 44.5233         |                |                  | 70.0287        | 35.5180          | S    |                  |                 |                 |                  |                 |                  | 13 |
| 2  | 102.0550 | <b>217.0819</b> | 109.0446        |                |                  | 199.0713       | 100.0393         | E    | 1281.6321        | 641.3197        | 1264.6056       | 632.8064         | 1263.6216       | 632.3144         | 12 |
| 3  | 70.0651  | <b>314.1347</b> | 157.5710        |                |                  | 296.1241       | 148.5657         | P    | <b>1152.5895</b> | 576.7984        | 1135.5630       | 568.2851         | 1134.5790       | 567.7931         | 11 |
| 4  | 86.0964  | <b>427.2187</b> | 214.1130        |                |                  | 409.2082       | 205.1077         | I    | 1055.5368        | 528.2720        | 1038.5102       | 519.7587         | 1037.5262       | 519.2667         | 10 |
| 5  | 70.0651  | 524.2715        | 262.6394        |                |                  | 506.2609       | 253.6341         | P    | <b>942.4527</b>  | <b>471.7300</b> | 925.4262        | 463.2167         | <b>924.4421</b> | 462.7247         | 9  |
| 6  | 102.0550 | 653.3141        | 327.1607        |                |                  | 635.3035       | 318.1554         | E    | <b>845.3999</b>  | 423.2036        | 828.3734        | 414.6903         | 827.3894        | 414.1983         | 8  |
| 7  | 60.0444  | 740.3461        | 370.6767        |                |                  | 722.3355       | 361.6714         | S    | <b>716.3573</b>  | <b>358.6823</b> | 699.3308        | 350.1690         | 698.3468        | 349.6770         | 7  |
| 8  | 87.0553  | 854.3890        | 427.6982        | 837.3625       | 419.1849         | 836.3785       | 418.6929         | N    | 629.3253         | 315.1663        | 612.2988        | 306.6530         | 611.3148        | 306.1610         | 6  |
| 9  | 88.0393  | 969.4160        | 485.2116        | 952.3894       | 476.6984         | 951.4054       | 476.2063         | D    | <b>515.2824</b>  | 258.1448        | 498.2558        | 249.6316         | 497.2718        | 249.1396         | 5  |
| 10 | 30.0338  | 1026.4374       | 513.7224        | 1009.4109      | 505.2091         | 1008.4269      | 504.7171         | G    | <b>400.2554</b>  | 200.6314        | 383.2289        | 192.1181         |                 |                  | 4  |
| 11 | 70.0651  | 1123.4902       | 562.2487        | 1106.4637      | 553.7355         | 1105.4796      | 553.2435         | P    | <b>343.2340</b>  | 172.1206        | 326.2074        | 163.6074         |                 |                  | 3  |
| 12 | 72.0808  | 1222.5586       | 611.7829        | 1205.5321      | 603.2697         | 1204.5481      | 602.7777         | V    | 246.1812         | 123.5942        | <b>229.1547</b> | 115.0810         |                 |                  | 2  |
| 13 | 101.1073 |                 |                 |                |                  |                |                  | K    | 147.1128         | 74.0600         | 130.0863        | 65.5468          |                 |                  | 1  |

MS/MS Fragmentation of **TASNVEEAFINTAK**

Found in **P61019**, P61019|RAB2A\_HUMAN Ras-related protein Rab-2A OS=Homo sapiens GN=RAB2A PE=1 SV=1

Match to Query 669: 1493.745362 from(747.879957,2+)

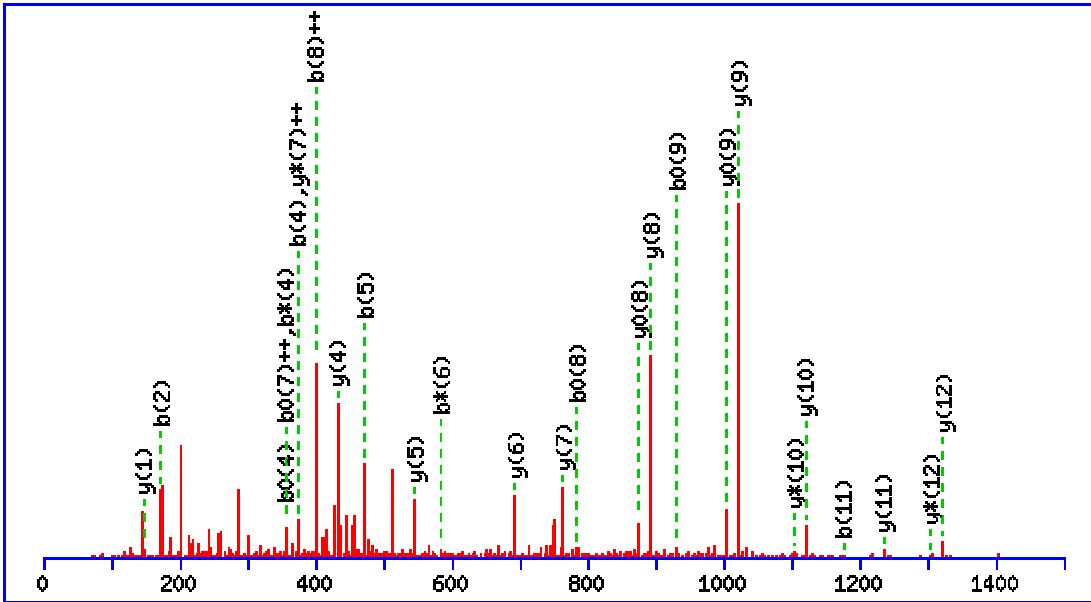

Monoisotopic mass of neutral peptide Mr(calc): 1493.7362

Fixed modifications: Carbamidomethyl (C)

Ions Score: 66 Expect: 1.7e-005

Matches (Bold Red): 26/160 fragment ions using 47 most intense peaks

| #  | Immon.   | b                | b <sup>++</sup> | b <sup>*</sup>  | b <sup>***</sup> | b <sup>0</sup>  | b <sup>0++</sup> | Seq. | y                | y <sup>++</sup> | y <sup>*</sup>   | y <sup>***</sup> | y <sup>0</sup>   | y <sup>0++</sup> | #  |
|----|----------|------------------|-----------------|-----------------|------------------|-----------------|------------------|------|------------------|-----------------|------------------|------------------|------------------|------------------|----|
| 1  | 74.0600  | 102.0550         | 51.5311         |                 |                  | 84.0444         | 42.5258          | T    |                  |                 |                  |                  |                  |                  | 14 |
| 2  | 44.0495  | <b>173.0921</b>  | 87.0497         |                 |                  | 155.0815        | 78.0444          | A    | 1393.6958        | 697.3515        | 1376.6692        | 688.8383         | 1375.6852        | 688.3462         | 13 |
| 3  | 60.0444  | 260.1241         | 130.5657        |                 |                  | 242.1135        | 121.5604         | S    | <b>1322.6587</b> | 661.8330        | <b>1305.6321</b> | 653.3197         | 1304.6481        | 652.8277         | 12 |
| 4  | 87.0553  | <b>374.1670</b>  | 187.5871        | <b>357.1405</b> | 179.0739         | <b>356.1565</b> | 178.5819         | N    | <b>1235.6266</b> | 618.3170        | 1218.6001        | 609.8037         | 1217.6161        | 609.3117         | 11 |
| 5  | 72.0808  | <b>473.2354</b>  | 237.1214        | 456.2089        | 228.6081         | 455.2249        | 228.1161         | V    | <b>1121.5837</b> | 561.2955        | <b>1104.5572</b> | 552.7822         | 1103.5732        | 552.2902         | 10 |
| 6  | 102.0550 | 602.2780         | 301.6427        | <b>585.2515</b> | 293.1294         | 584.2675        | 292.6374         | E    | <b>1022.5153</b> | 511.7613        | 1005.4888        | 503.2480         | <b>1004.5047</b> | 502.7560         | 9  |
| 7  | 102.0550 | 731.3206         | 366.1640        | 714.2941        | 357.6507         | 713.3101        | <b>357.1587</b>  | E    | <b>893.4727</b>  | 447.2400        | 876.4462         | 438.7267         | <b>875.4621</b>  | 438.2347         | 8  |
| 8  | 44.0495  | 802.3577         | <b>401.6825</b> | 785.3312        | 393.1692         | <b>784.3472</b> | 392.6772         | A    | <b>764.4301</b>  | 382.7187        | 747.4036         | <b>374.2054</b>  | 746.4196         | 373.7134         | 7  |
| 9  | 120.0808 | 949.4262         | 475.2167        | 932.3996        | 466.7034         | <b>931.4156</b> | 466.2114         | F    | <b>693.3930</b>  | 347.2001        | 676.3665         | 338.6869         | 675.3824         | 338.1949         | 6  |
| 10 | 86.0964  | 1062.5102        | 531.7587        | 1045.4837       | 523.2455         | 1044.4997       | 522.7535         | I    | <b>546.3246</b>  | 273.6659        | 529.2980         | 265.1527         | 528.3140         | 264.6606         | 5  |
| 11 | 87.0553  | <b>1176.5531</b> | 588.7802        | 1159.5266       | 580.2669         | 1158.5426       | 579.7749         | N    | <b>433.2405</b>  | 217.1239        | 416.2140         | 208.6106         | 415.2300         | 208.1186         | 4  |
| 12 | 74.0600  | 1277.6008        | 639.3040        | 1260.5743       | 630.7908         | 1259.5903       | 630.2988         | T    | 319.1976         | 160.1024        | 302.1710         | 151.5892         | 301.1870         | 151.0972         | 3  |
| 13 | 44.0495  | 1348.6379        | 674.8226        | 1331.6114       | 666.3093         | 1330.6274       | 665.8173         | A    | 218.1499         | 109.5786        | 201.1234         | 101.0653         |                  |                  | 2  |
| 14 | 101.1073 |                  |                 |                 |                  |                 |                  | K    | <b>147.1128</b>  | 74.0600         | 130.0863         | 65.5468          |                  |                  | 1  |

MS/MS Fragmentation of **AMADALLER**

Found in **P34897**, P34897|GLYM\_HUMAN Serine hydroxymethyltransferase, mitochondrial OS=Homo sapiens GN=SHMT2 PE=1 SV=3

Match to Query 376: 1004.464802 from(503.239677,2+)

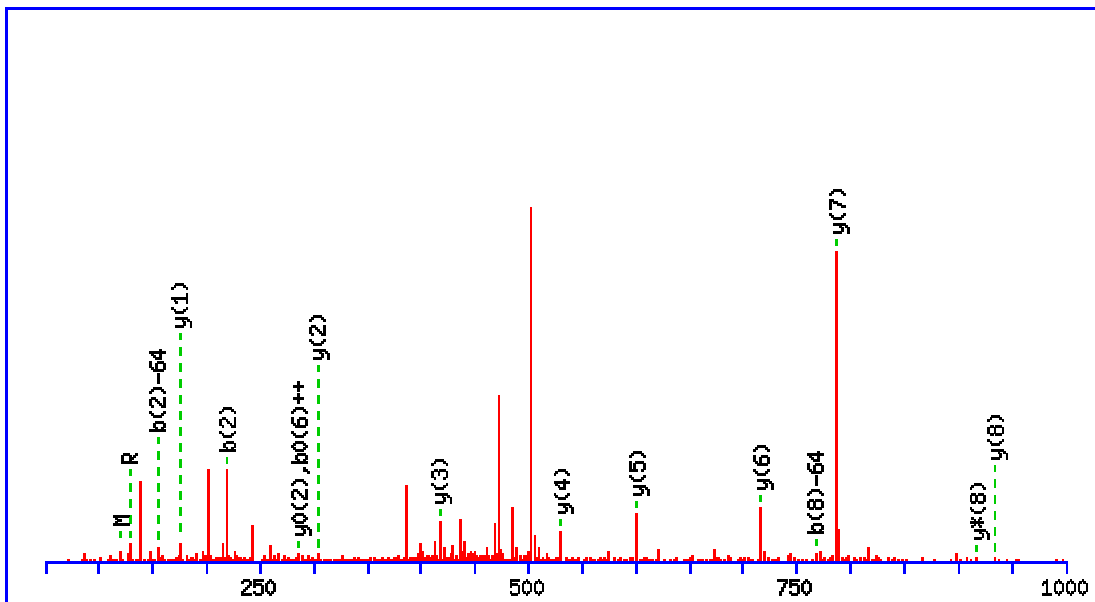

Monoisotopic mass of neutral peptide  $M_r(\text{calc})$ : 1004.4960

Fixed modifications: Carbamidomethyl (C)

Variable modifications:

**M2** : Oxidation (M), with neutral losses 0.0000 (shown in table), 63.9983

Ions Score: 36 Expect: 0.023

Matches (**Bold Red**): 16/112 fragment ions using 41 most intense peaks

| # | Immon.          | b               | b <sup>++</sup> | b <sup>0</sup> | b <sup>0++</sup> | Seq. | y               | y <sup>++</sup> | y*              | y <sup>*++</sup> | y <sup>0</sup>  | y <sup>0++</sup> | # |
|---|-----------------|-----------------|-----------------|----------------|------------------|------|-----------------|-----------------|-----------------|------------------|-----------------|------------------|---|
| 1 | 44.0495         | 72.0444         | 36.5258         |                |                  | A    |                 |                 |                 |                  |                 |                  | 9 |
| 2 | <b>120.0478</b> | <b>219.0798</b> | 110.0435        |                |                  | M    | <b>934.4662</b> | 467.7368        | <b>917.4397</b> | 459.2235         | 916.4557        | 458.7315         | 8 |
| 3 | 44.0495         | 290.1169        | 145.5621        |                |                  | A    | <b>787.4308</b> | 394.2191        | 770.4043        | 385.7058         | 769.4203        | 385.2138         | 7 |
| 4 | 88.0393         | 405.1439        | 203.0756        | 387.1333       | 194.0703         | D    | <b>716.3937</b> | 358.7005        | 699.3672        | 350.1872         | 698.3832        | 349.6952         | 6 |
| 5 | 44.0495         | 476.1810        | 238.5941        | 458.1704       | 229.5888         | A    | <b>601.3668</b> | 301.1870        | 584.3402        | 292.6738         | 583.3562        | 292.1817         | 5 |
| 6 | 86.0964         | 589.2650        | 295.1362        | 571.2545       | <b>286.1309</b>  | L    | <b>530.3297</b> | 265.6685        | 513.3031        | 257.1552         | 512.3191        | 256.6632         | 4 |
| 7 | 86.0964         | 702.3491        | 351.6782        | 684.3385       | 342.6729         | L    | <b>417.2456</b> | 209.1264        | 400.2191        | 200.6132         | 399.2350        | 200.1212         | 3 |
| 8 | 102.0550        | 831.3917        | 416.1995        | 813.3811       | 407.1942         | E    | <b>304.1615</b> | 152.5844        | 287.1350        | 144.0711         | <b>286.1510</b> | 143.5791         | 2 |
| 9 | <b>129.1135</b> |                 |                 |                |                  | R    | <b>175.1190</b> | 88.0631         | 158.0924        | 79.5498          |                 |                  | 1 |

MS/MS Fragmentation of **APVPGTPDSLSSGSSR**

Found in **Q9UJZ1**, Q9UJZ1|STML2\_HUMAN Stomatin-like protein 2 OS=Homo sapiens GN=STOML2  
 PE=1 SV=1

Match to Query 358: 1513.916032 from(757.965292,2,+)

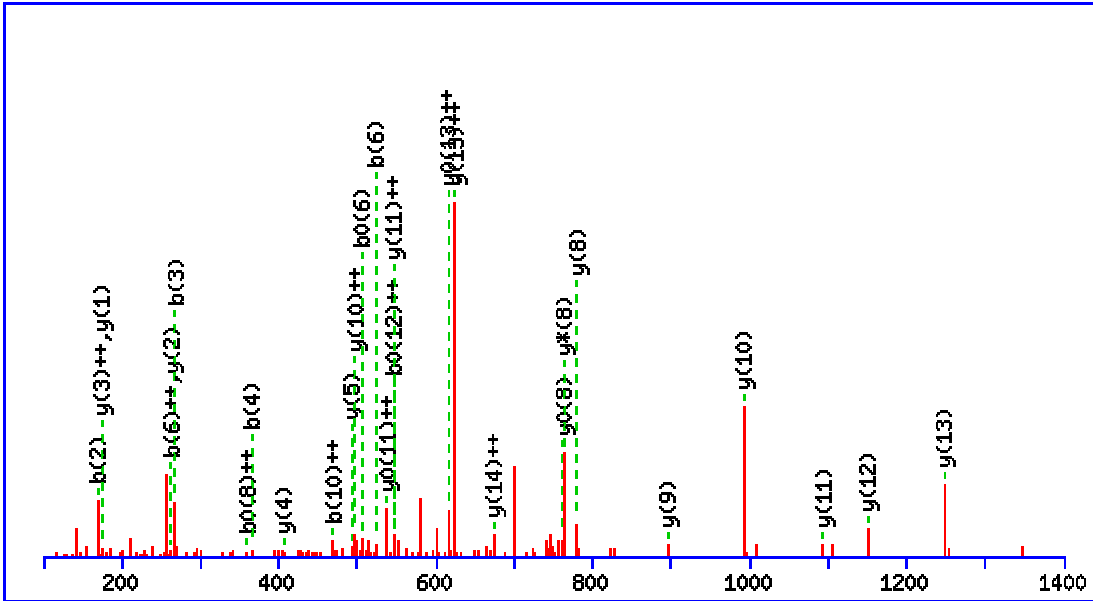

Monoisotopic mass of neutral peptide Mr(calc): 1513.7373

Fixed modifications: Carbamidomethyl (C)

Ions Score: 38 Expect: 0.0099

Matches (Bold Red): 28/154 fragment ions using 90 most intense peaks

| #  | Immon.   | b               | b <sup>++</sup> | b <sup>0</sup>  | b <sup>0++</sup> | Seq. | y                | y <sup>++</sup> | y <sup>*</sup>  | y <sup>*++</sup> | y <sup>0</sup>  | y <sup>0++</sup> | #  |
|----|----------|-----------------|-----------------|-----------------|------------------|------|------------------|-----------------|-----------------|------------------|-----------------|------------------|----|
| 1  | 44.0495  | 72.0444         | 36.5258         |                 |                  | A    |                  |                 |                 |                  |                 |                  | 16 |
| 2  | 70.0651  | <b>169.0972</b> | 85.0522         |                 |                  | P    | 1443.7074        | 722.3573        | 1426.6809       | 713.8441         | 1425.6968       | 713.3521         | 15 |
| 3  | 72.0808  | <b>268.1656</b> | 134.5864        |                 |                  | V    | 1346.6546        | <b>673.8310</b> | 1329.6281       | 665.3177         | 1328.6441       | 664.8257         | 14 |
| 4  | 70.0651  | <b>365.2183</b> | 183.1128        |                 |                  | P    | <b>1247.5862</b> | <b>624.2968</b> | 1230.5597       | 615.7835         | 1229.5757       | <b>615.2915</b>  | 13 |
| 5  | 30.0338  | 422.2398        | 211.6235        |                 |                  | G    | <b>1150.5335</b> | 575.7704        | 1133.5069       | 567.2571         | 1132.5229       | 566.7651         | 12 |
| 6  | 74.0600  | <b>523.2875</b> | <b>262.1474</b> | <b>505.2769</b> | 253.1421         | T    | <b>1093.5120</b> | <b>547.2596</b> | 1076.4855       | 538.7464         | 1075.5014       | <b>538.2544</b>  | 11 |
| 7  | 70.0651  | 620.3402        | 310.6738        | 602.3297        | 301.6685         | P    | <b>992.4643</b>  | <b>496.7358</b> | 975.4378        | 488.2225         | 974.4538        | 487.7305         | 10 |
| 8  | 88.0393  | 735.3672        | 368.1872        | 717.3566        | <b>359.1819</b>  | D    | <b>895.4116</b>  | 448.2094        | 878.3850        | 439.6961         | 877.4010        | 439.2041         | 9  |
| 9  | 60.0444  | 822.3992        | 411.7032        | 804.3886        | 402.6980         | S    | <b>780.3846</b>  | 390.6959        | <b>763.3581</b> | 382.1827         | <b>762.3741</b> | 381.6907         | 8  |
| 10 | 86.0964  | 935.4833        | <b>468.2453</b> | 917.4727        | 459.2400         | L    | 693.3526         | 347.1799        | 676.3260        | 338.6667         | 675.3420        | 338.1747         | 7  |
| 11 | 60.0444  | 1022.5153       | 511.7613        | 1004.5047       | 502.7560         | S    | 580.2685         | 290.6379        | 563.2420        | 282.1246         | 562.2580        | 281.6326         | 6  |
| 12 | 60.0444  | 1109.5473       | 555.2773        | 1091.5368       | <b>546.2720</b>  | S    | <b>493.2365</b>  | 247.1219        | 476.2100        | 238.6086         | 475.2259        | 238.1166         | 5  |
| 13 | 30.0338  | 1166.5688       | 583.7880        | 1148.5582       | 574.7828         | G    | <b>406.2045</b>  | 203.6059        | 389.1779        | 195.0926         | 388.1939        | 194.6006         | 4  |
| 14 | 60.0444  | 1253.6008       | 627.3040        | 1235.5903       | 618.2988         | S    | 349.1830         | <b>175.0951</b> | 332.1565        | 166.5819         | 331.1724        | 166.0899         | 3  |
| 15 | 60.0444  | 1340.6329       | 670.8201        | 1322.6223       | 661.8148         | S    | <b>262.1510</b>  | 131.5791        | 245.1244        | 123.0659         | 244.1404        | 122.5738         | 2  |
| 16 | 129.1135 |                 |                 |                 |                  | R    | <b>175.1190</b>  | 88.0631         | 158.0924        | 79.5498          |                 |                  | 1  |

MS/MS Fragmentation of **GDVTAQIALQPALK**

Found in **P04179**, P04179|SODM\_HUMAN Superoxide dismutase [Mn], mitochondrial OS=Homo sapiens  
GN=SOD2 PE=1 SV=2

Match to Query 425: 1423.727704 from(712.871128,2+)

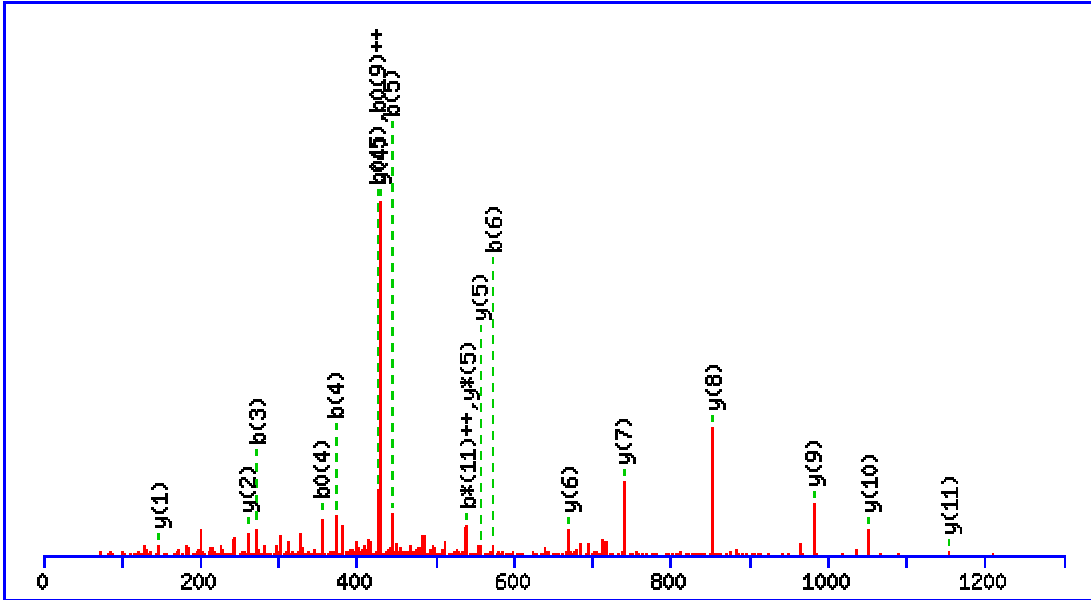

Monoisotopic mass of neutral peptide Mr(calc): 1423.8035

Fixed modifications: Carbamidomethyl (C)

Ions Score: 66 Expect: 1.6e-005

Matches (**Bold Red**): 19/138 fragment ions using 28 most intense peaks

| #  | Immon.   | b               | b <sup>++</sup> | b <sup>*</sup> | b <sup>*++</sup> | b <sup>0</sup>  | b <sup>0++</sup> | Seq.     | y                | y <sup>++</sup> | y <sup>*</sup>  | y <sup>*++</sup> | y <sup>0</sup> | y <sup>0++</sup> | #  |
|----|----------|-----------------|-----------------|----------------|------------------|-----------------|------------------|----------|------------------|-----------------|-----------------|------------------|----------------|------------------|----|
| 1  | 30.0338  | 58.0287         | 29.5180         |                |                  |                 |                  | <b>G</b> |                  |                 |                 |                  |                |                  | 14 |
| 2  | 88.0393  | 173.0557        | 87.0315         |                |                  | 155.0451        | 78.0262          | <b>D</b> | 1367.7893        | 684.3983        | 1350.7627       | 675.8850         | 1349.7787      | 675.3930         | 13 |
| 3  | 72.0808  | <b>272.1241</b> | 136.5657        |                |                  | 254.1135        | 127.5604         | <b>V</b> | 1252.7624        | 626.8848        | 1235.7358       | 618.3715         | 1234.7518      | 617.8795         | 12 |
| 4  | 74.0600  | <b>373.1718</b> | 187.0895        |                |                  | <b>355.1612</b> | 178.0842         | <b>T</b> | <b>1153.6939</b> | 577.3506        | 1136.6674       | 568.8373         | 1135.6834      | 568.3453         | 11 |
| 5  | 44.0495  | <b>444.2089</b> | 222.6081        |                |                  | <b>426.1983</b> | 213.6028         | <b>A</b> | <b>1052.6463</b> | 526.8268        | 1035.6197       | 518.3135         |                |                  | 10 |
| 6  | 101.0709 | <b>572.2675</b> | 286.6374        | 555.2409       | 278.1241         | 554.2569        | 277.6321         | <b>Q</b> | <b>981.6091</b>  | 491.3082        | 964.5826        | 482.7949         |                |                  | 9  |
| 7  | 86.0964  | 685.3515        | 343.1794        | 668.3250       | 334.6661         | 667.3410        | 334.1741         | <b>I</b> | <b>853.5506</b>  | 427.2789        | 836.5240        | 418.7656         |                |                  | 8  |
| 8  | 44.0495  | 756.3886        | 378.6980        | 739.3621       | 370.1847         | 738.3781        | 369.6927         | <b>A</b> | <b>740.4665</b>  | 370.7369        | 723.4400        | 362.2236         |                |                  | 7  |
| 9  | 86.0964  | 869.4727        | 435.2400        | 852.4462       | 426.7267         | 851.4621        | <b>426.2347</b>  | <b>L</b> | <b>669.4294</b>  | 335.2183        | 652.4028        | 326.7051         |                |                  | 6  |
| 10 | 101.0709 | 997.5313        | 499.2693        | 980.5047       | 490.7560         | 979.5207        | 490.2640         | <b>Q</b> | <b>556.3453</b>  | 278.6763        | <b>539.3188</b> | 270.1630         |                |                  | 5  |
| 11 | 70.0651  | 1094.5841       | 547.7957        | 1077.5575      | <b>539.2824</b>  | 1076.5735       | 538.7904         | <b>P</b> | <b>428.2867</b>  | 214.6470        | 411.2602        | 206.1337         |                |                  | 4  |
| 12 | 44.0495  | 1165.6212       | 583.3142        | 1148.5946      | 574.8009         | 1147.6106       | 574.3089         | <b>A</b> | 331.2340         | 166.1206        | 314.2074        | 157.6074         |                |                  | 3  |
| 13 | 86.0964  | 1278.7052       | 639.8563        | 1261.6787      | 631.3430         | 1260.6947       | 630.8510         | <b>L</b> | <b>260.1969</b>  | 130.6021        | 243.1703        | 122.0888         |                |                  | 2  |
| 14 | 101.1073 |                 |                 |                |                  |                 |                  | <b>K</b> | <b>147.1128</b>  | 74.0600         | 130.0863        | 65.5468          |                |                  | 1  |

MS/MS Fragmentation of **GVDIVMDPLGGSDTAK**

Found in **Q99536**, Q99536|VAT1\_HUMAN Synaptic vesicle membrane protein VAT-1 homolog OS=Homo sapiens GN=VAT1 PE=1 SV=2

Match to Query 622: 1589.687178 from(795.850865,2+)

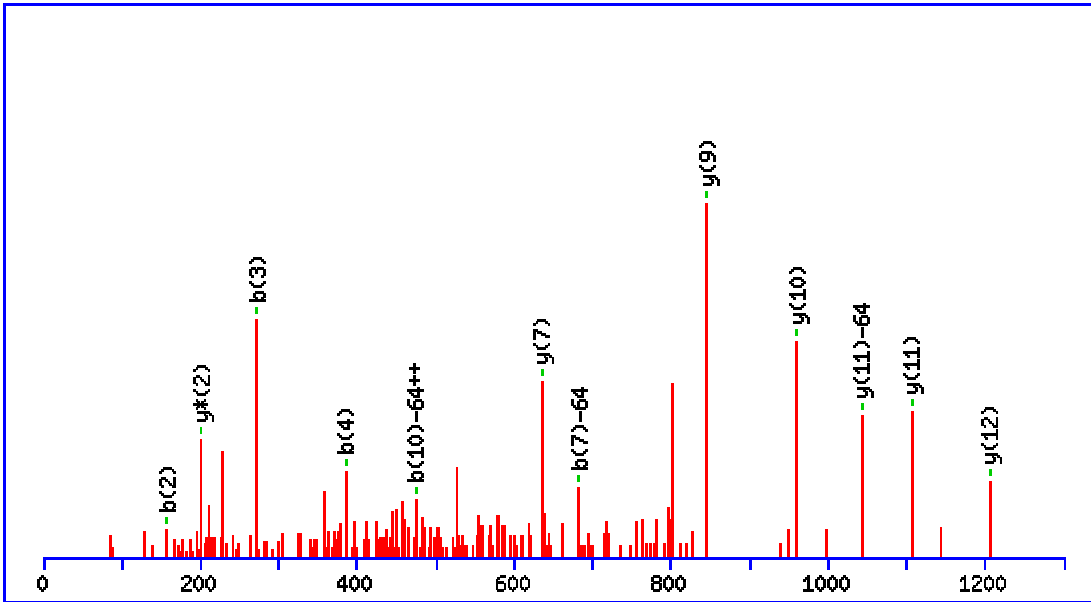

Monoisotopic mass of neutral peptide Mr(calc): 1589.7607

Fixed modifications: Carbamidomethyl (C)

Variable modifications:

M6 : Oxidation (M), with neutral losses 0.0000(shown in table), 63.9983

Ions Score: 32 Expect: 0.042

Matches (**Bold Red**): 12/229 fragment ions using 20 most intense peaks

| #  | Immon.   | b               | b <sup>+</sup> | b <sup>0</sup> | b <sup>0+</sup> | Seq. | y                | y <sup>+</sup> | y <sup>*</sup>  | y <sup>*+</sup> | y <sup>0</sup> | y <sup>0+</sup> | #  |
|----|----------|-----------------|----------------|----------------|-----------------|------|------------------|----------------|-----------------|-----------------|----------------|-----------------|----|
| 1  | 30.0338  | 58.0287         | 29.5180        |                |                 | G    |                  |                |                 |                 |                |                 | 16 |
| 2  | 72.0808  | <b>157.0972</b> | 79.0522        |                |                 | V    | 1533.7465        | 767.3769       | 1516.7200       | 758.8636        | 1515.7359      | 758.3716        | 15 |
| 3  | 88.0393  | <b>272.1241</b> | 136.5657       | 254.1135       | 127.5604        | D    | 1434.6781        | 717.8427       | 1417.6515       | 709.3294        | 1416.6675      | 708.8374        | 14 |
| 4  | 86.0964  | <b>385.2082</b> | 193.1077       | 367.1976       | 184.1024        | I    | 1319.6511        | 660.3292       | 1302.6246       | 651.8159        | 1301.6406      | 651.3239        | 13 |
| 5  | 72.0808  | 484.2766        | 242.6419       | 466.2660       | 233.6366        | V    | <b>1206.5671</b> | 603.7872       | 1189.5405       | 595.2739        | 1188.5565      | 594.7819        | 12 |
| 6  | 120.0478 | 631.3120        | 316.1596       | 613.3014       | 307.1543        | M    | <b>1107.4987</b> | 554.2530       | 1090.4721       | 545.7397        | 1089.4881      | 545.2477        | 11 |
| 7  | 88.0393  | 746.3389        | 373.6731       | 728.3284       | 364.6678        | D    | <b>960.4633</b>  | 480.7353       | 943.4367        | 472.2220        | 942.4527       | 471.7300        | 10 |
| 8  | 70.0651  | 843.3917        | 422.1995       | 825.3811       | 413.1942        | P    | <b>845.4363</b>  | 423.2218       | 828.4098        | 414.7085        | 827.4258       | 414.2165        | 9  |
| 9  | 86.0964  | 956.4758        | 478.7415       | 938.4652       | 469.7362        | L    | 748.3836         | 374.6954       | 731.3570        | 366.1821        | 730.3730       | 365.6901        | 8  |
| 10 | 30.0338  | 1013.4972       | 507.2522       | 995.4866       | 498.2470        | G    | <b>635.2995</b>  | 318.1534       | 618.2729        | 309.6401        | 617.2889       | 309.1481        | 7  |
| 11 | 30.0338  | 1070.5187       | 535.7630       | 1052.5081      | 526.7577        | G    | 578.2780         | 289.6427       | 561.2515        | 281.1294        | 560.2675       | 280.6374        | 6  |
| 12 | 60.0444  | 1157.5507       | 579.2790       | 1139.5401      | 570.2737        | S    | 521.2566         | 261.1319       | 504.2300        | 252.6186        | 503.2460       | 252.1266        | 5  |
| 13 | 88.0393  | 1272.5776       | 636.7925       | 1254.5671      | 627.7872        | D    | 434.2245         | 217.6159       | 417.1980        | 209.1026        | 416.2140       | 208.6106        | 4  |
| 14 | 74.0600  | 1373.6253       | 687.3163       | 1355.6148      | 678.3110        | T    | 319.1976         | 160.1024       | 302.1710        | 151.5892        | 301.1870       | 151.0972        | 3  |
| 15 | 44.0495  | 1444.6624       | 722.8349       | 1426.6519      | 713.8296        | A    | 218.1499         | 109.5786       | <b>201.1234</b> | 101.0653        |                |                 | 2  |
| 16 | 101.1073 |                 |                |                |                 | K    | 147.1128         | 74.0600        | 130.0863        | 65.5468         |                |                 | 1  |

MS/MS Fragmentation of **AADAEAEVASLNR**

Found in **P06753**, P06753|TPM3\_HUMAN Tropomyosin alpha-3 chain OS=Homo sapiens GN=TPM3 PE=1 SV=1

Match to Query 373: 1315.576542 from(658.795547,2+)

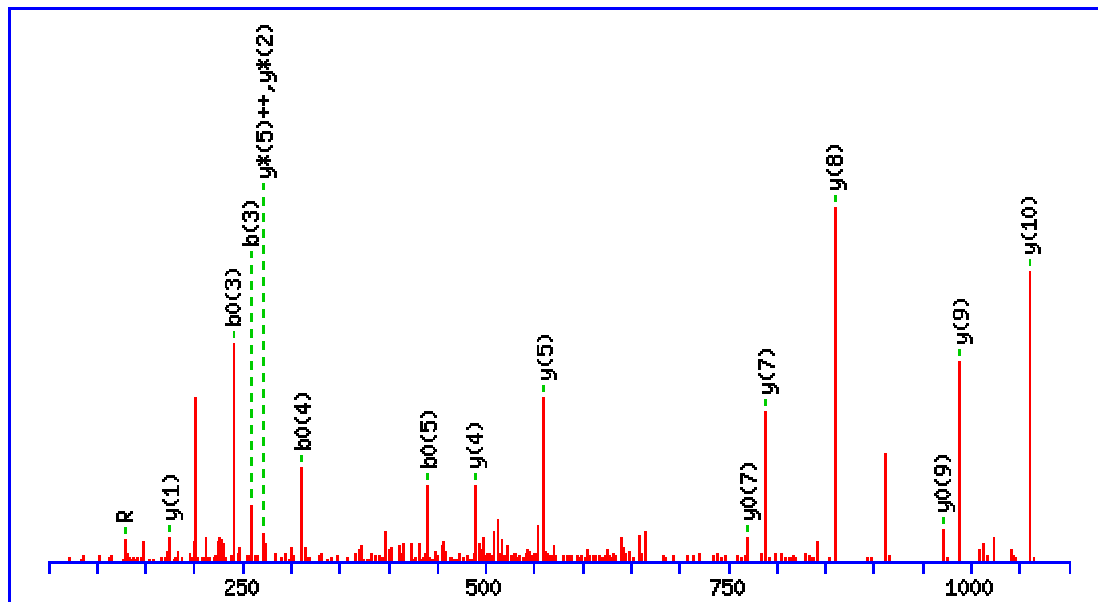

Monoisotopic mass of neutral peptide Mr(calc): 1315.6368

Fixed modifications: Carbamidomethyl (C)

Ions Score: 33 Expect: 0.037

Matches (Bold Red): 16/125 fragment ions using 22 most intense peaks

| #  | Immon.          | b               | b <sup>++</sup> | b <sup>*</sup> | b <sup>***</sup> | b <sup>0</sup>  | b <sup>0++</sup> | Seq. | y                | y <sup>++</sup> | y <sup>*</sup>  | y <sup>***</sup> | y <sup>0</sup>  | y <sup>0++</sup> | #  |
|----|-----------------|-----------------|-----------------|----------------|------------------|-----------------|------------------|------|------------------|-----------------|-----------------|------------------|-----------------|------------------|----|
| 1  | 44.0495         | 72.0444         | 36.5258         |                |                  |                 |                  | A    |                  |                 |                 |                  |                 |                  | 13 |
| 2  | 44.0495         | 143.0815        | 72.0444         |                |                  |                 |                  | A    | 1245.6070        | 623.3071        | 1228.5804       | 614.7938         | 1227.5964       | 614.3018         | 12 |
| 3  | 88.0393         | <b>258.1084</b> | 129.5579        |                |                  | <b>240.0979</b> | 120.5526         | D    | 1174.5699        | 587.7886        | 1157.5433       | 579.2753         | 1156.5593       | 578.7833         | 11 |
| 4  | 44.0495         | 329.1456        | 165.0764        |                |                  | <b>311.1350</b> | 156.0711         | A    | <b>1059.5429</b> | 530.2751        | 1042.5164       | 521.7618         | 1041.5323       | 521.2698         | 10 |
| 5  | 102.0550        | 458.1882        | 229.5977        |                |                  | <b>440.1776</b> | 220.5924         | E    | <b>988.5058</b>  | 494.7565        | 971.4792        | 486.2433         | <b>970.4952</b> | 485.7513         | 9  |
| 6  | 44.0495         | 529.2253        | 265.1163        |                |                  | 511.2147        | 256.1110         | A    | <b>859.4632</b>  | 430.2352        | 842.4367        | 421.7220         | 841.4526        | 421.2300         | 8  |
| 7  | 102.0550        | 658.2679        | 329.6376        |                |                  | 640.2573        | 320.6323         | E    | <b>788.4261</b>  | 394.7167        | 771.3995        | 386.2034         | <b>770.4155</b> | 385.7114         | 7  |
| 8  | 72.0808         | 757.3363        | 379.1718        |                |                  | 739.3257        | 370.1665         | V    | 659.3835         | 330.1954        | 642.3569        | 321.6821         | 641.3729        | 321.1901         | 6  |
| 9  | 44.0495         | 828.3734        | 414.6903        |                |                  | 810.3628        | 405.6850         | A    | <b>560.3151</b>  | 280.6612        | 543.2885        | <b>272.1479</b>  | 542.3045        | 271.6559         | 5  |
| 10 | 60.0444         | 915.4054        | 458.2063        |                |                  | 897.3949        | 449.2011         | S    | <b>489.2780</b>  | 245.1426        | 472.2514        | 236.6293         | 471.2674        | 236.1373         | 4  |
| 11 | 86.0964         | 1028.4895       | 514.7484        |                |                  | 1010.4789       | 505.7431         | L    | 402.2459         | 201.6266        | 385.2194        | 193.1133         |                 |                  | 3  |
| 12 | 87.0553         | 1142.5324       | 571.7698        | 1125.5059      | 563.2566         | 1124.5218       | 562.7646         | N    | 289.1619         | 145.0846        | <b>272.1353</b> | 136.5713         |                 |                  | 2  |
| 13 | <b>129.1135</b> |                 |                 |                |                  |                 |                  | R    | <b>175.1190</b>  | 88.0631         | 158.0924        | 79.5498          |                 |                  | 1  |



MS/MS Fragmentation of **IDVGAEPR**

Found in **P54577**, P54577|SYYC\_HUMAN Tyrosyl-tRNA synthetase, cytoplasmic OS=Homo sapiens  
 GN=YARS PE=1 SV=4

Match to Query 292: 984.457102 from(493.235827,2+)

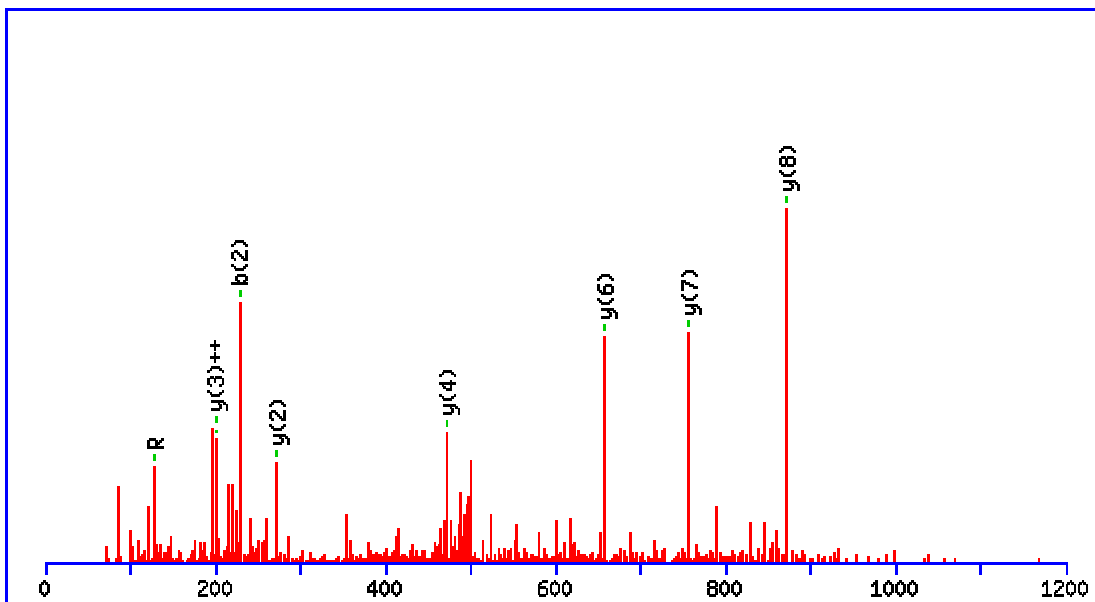

**Monoisotopic mass of neutral peptide Mr(calc):** 984.4876

**Fixed modifications:** Carbamidomethyl (C)

**Ions Score:** 35 **Expect:** 0.024

**Matches (Bold Red):** 8/83 fragment ions using 37 most intense peaks

| # | Immon.          | b               | b <sup>++</sup> | b <sup>0</sup> | b <sup>0++</sup> | Seq. | y               | y <sup>++</sup> | y <sup>*</sup> | y <sup>*++</sup> | y <sup>0</sup> | y <sup>0++</sup> | # |
|---|-----------------|-----------------|-----------------|----------------|------------------|------|-----------------|-----------------|----------------|------------------|----------------|------------------|---|
| 1 | 86.0964         | 114.0913        | 57.5493         |                |                  | I    |                 |                 |                |                  |                |                  | 9 |
| 2 | 88.0393         | <b>229.1183</b> | 115.0628        | 211.1077       | 106.0575         | D    | <b>872.4108</b> | 436.7091        | 855.3843       | 428.1958         | 854.4003       | 427.7038         | 8 |
| 3 | 72.0808         | 328.1867        | 164.5970        | 310.1761       | 155.5917         | V    | <b>757.3839</b> | 379.1956        | 740.3573       | 370.6823         | 739.3733       | 370.1903         | 7 |
| 4 | 30.0338         | 385.2082        | 193.1077        | 367.1976       | 184.1024         | G    | <b>658.3155</b> | 329.6614        | 641.2889       | 321.1481         | 640.3049       | 320.6561         | 6 |
| 5 | 102.0550        | 514.2508        | 257.6290        | 496.2402       | 248.6237         | E    | 601.2940        | 301.1506        | 584.2675       | 292.6374         | 583.2835       | 292.1454         | 5 |
| 6 | 44.0495         | 585.2879        | 293.1476        | 567.2773       | 284.1423         | A    | <b>472.2514</b> | 236.6293        | 455.2249       | 228.1161         | 454.2409       | 227.6241         | 4 |
| 7 | 102.0550        | 714.3305        | 357.6689        | 696.3199       | 348.6636         | E    | 401.2143        | <b>201.1108</b> | 384.1878       | 192.5975         | 383.2037       | 192.1055         | 3 |
| 8 | 70.0651         | 811.3832        | 406.1953        | 793.3727       | 397.1900         | P    | <b>272.1717</b> | 136.5895        | 255.1452       | 128.0762         |                |                  | 2 |
| 9 | <b>129.1135</b> |                 |                 |                |                  | R    | 175.1190        | 88.0631         | 158.0924       | 79.5498          |                |                  | 1 |

MS/MS Fragmentation of **LLDPSSPTK**

Found in **Q6IAA8**, Q6IAA8|CK059\_HUMAN UPF0404 protein C11orf59 OS=Homo sapiens GN=C11orf59 PE=1 SV=2

Match to Query 137: 1166.564074 from(584.289313,2+)

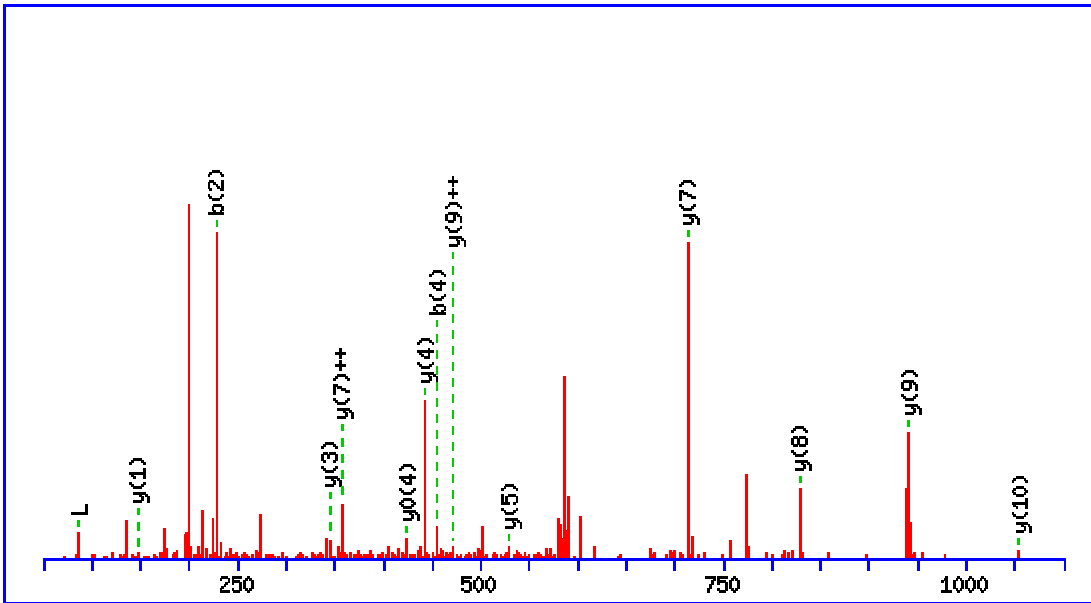

Monoisotopic mass of neutral peptide Mr(calc): 1166.6547

Fixed modifications: Carbamidomethyl (C)

Ions Score: 43 Expect: 0.0031

Matches (Bold Red): 16/103 fragment ions using 46 most intense peaks

| #  | Immon.         | b               | b <sup>++</sup> | b <sup>0</sup> | b <sup>0++</sup> | Seq. | y                | y <sup>++</sup> | y <sup>*</sup> | y <sup>*++</sup> | y <sup>0</sup>  | y <sup>0++</sup> | #  |
|----|----------------|-----------------|-----------------|----------------|------------------|------|------------------|-----------------|----------------|------------------|-----------------|------------------|----|
| 1  | <b>86.0964</b> | 114.0913        | 57.5493         |                |                  | L    |                  |                 |                |                  |                 |                  | 11 |
| 2  | <b>86.0964</b> | <b>227.1754</b> | 114.0913        |                |                  | L    | <b>1054.5779</b> | 527.7926        | 1037.5514      | 519.2793         | 1036.5673       | 518.7873         | 10 |
| 3  | <b>86.0964</b> | 340.2595        | 170.6334        |                |                  | L    | <b>941.4938</b>  | <b>471.2506</b> | 924.4673       | 462.7373         | 923.4833        | 462.2453         | 9  |
| 4  | 88.0393        | <b>455.2864</b> | 228.1468        | 437.2758       | 219.1416         | D    | <b>828.4098</b>  | 414.7085        | 811.3832       | 406.1953         | 810.3992        | 405.7032         | 8  |
| 5  | 70.0651        | 552.3392        | 276.6732        | 534.3286       | 267.6679         | P    | <b>713.3828</b>  | <b>357.1951</b> | 696.3563       | 348.6818         | 695.3723        | 348.1898         | 7  |
| 6  | 60.0444        | 639.3712        | 320.1892        | 621.3606       | 311.1840         | S    | 616.3301         | 308.6687        | 599.3035       | 300.1554         | 598.3195        | 299.6634         | 6  |
| 7  | 60.0444        | 726.4032        | 363.7053        | 708.3927       | 354.7000         | S    | <b>529.2980</b>  | 265.1527        | 512.2715       | 256.6394         | 511.2875        | 256.1474         | 5  |
| 8  | 70.0651        | 823.4560        | 412.2316        | 805.4454       | 403.2264         | P    | <b>442.2660</b>  | 221.6366        | 425.2395       | 213.1234         | <b>424.2554</b> | 212.6314         | 4  |
| 9  | 70.0651        | 920.5088        | 460.7580        | 902.4982       | 451.7527         | P    | <b>345.2132</b>  | 173.1103        | 328.1867       | 164.5970         | 327.2027        | 164.1050         | 3  |
| 10 | 74.0600        | 1021.5564       | 511.2819        | 1003.5459      | 502.2766         | T    | 248.1605         | 124.5839        | 231.1339       | 116.0706         | 230.1499        | 115.5786         | 2  |
| 11 | 101.1073       |                 |                 |                |                  | K    | <b>147.1128</b>  | 74.0600         | 130.0863       | 65.5468          |                 |                  | 1  |

MS/MS Fragmentation of **LQSEVAELK**

Found in **P53990**, P53990|K0174\_HUMAN Uncharacterized protein KIAA0174 OS=Homo sapiens  
 GN=KIAA0174 PE=1 SV=1

Match to Query 310: 1015.512622 from(508.763587,2+)

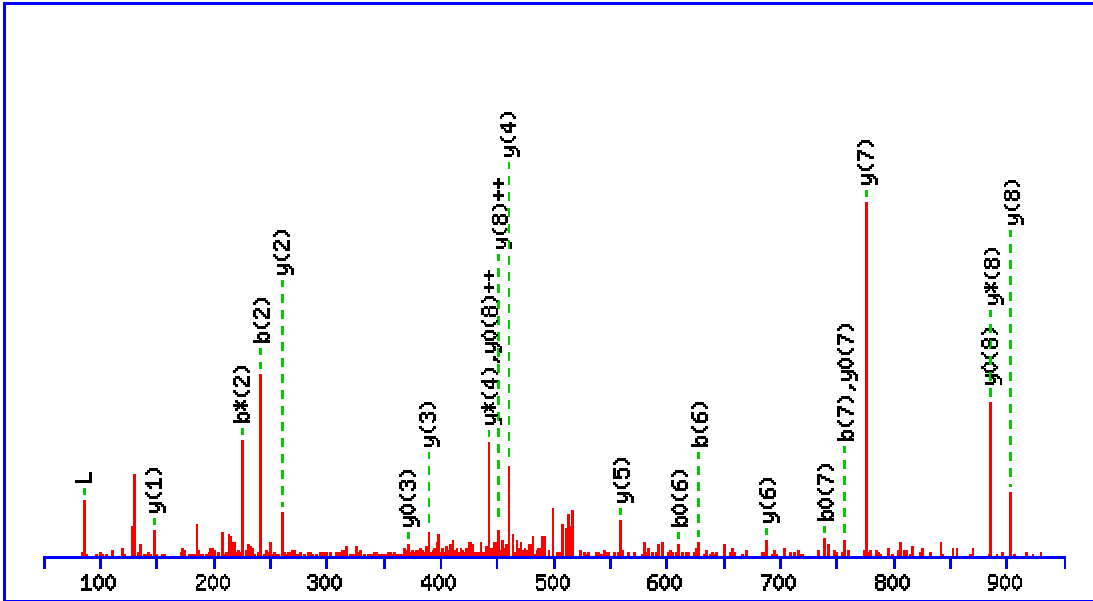

Monoisotopic mass of neutral peptide Mr(calc): 1015.5549

Fixed modifications: Carbamidomethyl (C)

Ions Score: 56 Expect: 0.00023

Matches (Bold Red): 23/95 fragment ions using 36 most intense peaks

| # | Immon.         | b               | b <sup>++</sup> | b*              | b <sup>*++</sup> | b <sup>0</sup>  | b <sup>0++</sup> | Seq. | y               | y <sup>++</sup> | y*              | y <sup>*++</sup> | y <sup>0</sup>  | y <sup>0++</sup> | # |
|---|----------------|-----------------|-----------------|-----------------|------------------|-----------------|------------------|------|-----------------|-----------------|-----------------|------------------|-----------------|------------------|---|
| 1 | <b>86.0964</b> | 114.0913        | 57.5493         |                 |                  |                 |                  | L    |                 |                 |                 |                  |                 |                  | 9 |
| 2 | 101.0709       | <b>242.1499</b> | 121.5786        | <b>225.1234</b> | 113.0653         |                 |                  | Q    | <b>903.4782</b> | <b>452.2427</b> | <b>886.4516</b> | 443.7295         | <b>885.4676</b> | <b>443.2374</b>  | 8 |
| 3 | 60.0444        | 329.1819        | 165.0946        | 312.1554        | 156.5813         | 311.1714        | 156.0893         | S    | <b>775.4196</b> | 388.2134        | 758.3931        | 379.7002         | <b>757.4090</b> | 379.2082         | 7 |
| 4 | 102.0550       | 458.2245        | 229.6159        | 441.1980        | 221.1026         | 440.2140        | 220.6106         | E    | <b>688.3876</b> | 344.6974        | 671.3610        | 336.1842         | 670.3770        | 335.6921         | 6 |
| 5 | 72.0808        | 557.2930        | 279.1501        | 540.2664        | 270.6368         | 539.2824        | 270.1448         | V    | <b>559.3450</b> | 280.1761        | 542.3184        | 271.6629         | 541.3344        | 271.1709         | 5 |
| 6 | 44.0495        | <b>628.3301</b> | 314.6687        | 611.3035        | 306.1554         | <b>610.3195</b> | 305.6634         | A    | <b>460.2766</b> | 230.6419        | <b>443.2500</b> | 222.1287         | 442.2660        | 221.6366         | 4 |
| 7 | 102.0550       | <b>757.3727</b> | 379.1900        | 740.3461        | 370.6767         | <b>739.3621</b> | 370.1847         | E    | <b>389.2395</b> | 195.1234        | 372.2129        | 186.6101         | <b>371.2289</b> | 186.1181         | 3 |
| 8 | <b>86.0964</b> | 870.4567        | 435.7320        | 853.4302        | 427.2187         | 852.4462        | 426.7267         | L    | <b>260.1969</b> | 130.6021        | 243.1703        | 122.0888         |                 |                  | 2 |
| 9 | 101.1073       |                 |                 |                 |                  |                 |                  | K    | <b>147.1128</b> | 74.0600         | 130.0863        | 65.5468          |                 |                  | 1 |

MS/MS Fragmentation of **IQLNNPTER**

Found in **Q8IYS2**, Q8IYS2|K2013\_HUMAN Uncharacterized protein KIAA2013 OS=Homo sapiens  
 GN=KIAA2013 PE=2 SV=1

Match to Query 180: 1083.398390 from(542.706471,2+)

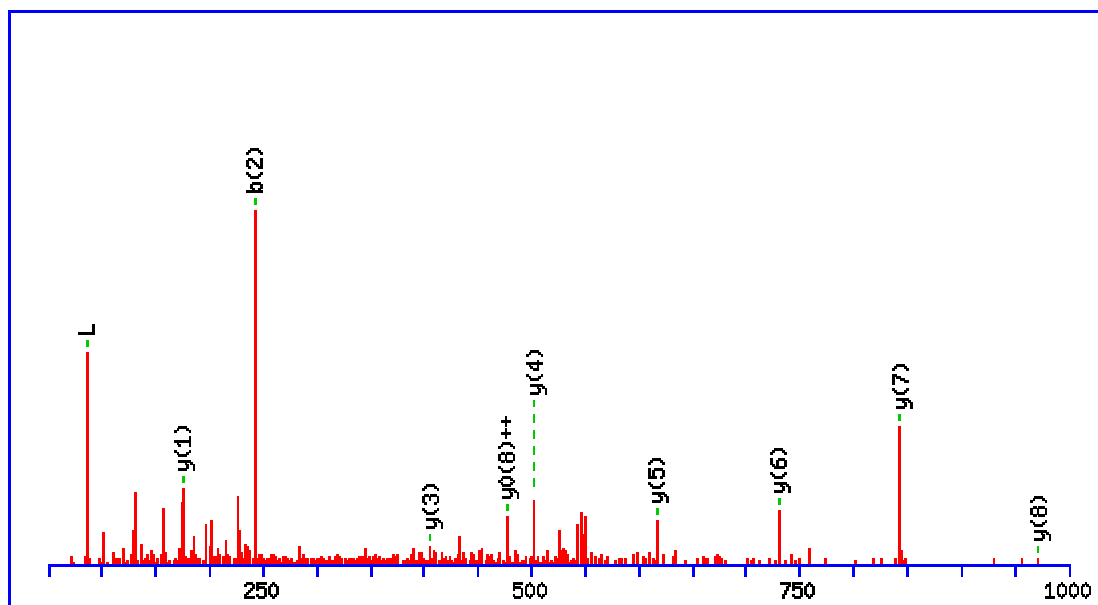

**Monoisotopic mass of neutral peptide Mr(calc):** 1083.5672

**Fixed modifications:** Carbamidomethyl (C)

**Ions Score:** 48 **Expect:** 0.0012

**Matches (Bold Red):** 11/89 fragment ions using 22 most intense peaks

| # | Immon.         | b               | b <sup>++</sup> | b <sup>*</sup> | b <sup>*++</sup> | b <sup>0</sup> | b <sup>0++</sup> | Seq. | y               | y <sup>++</sup> | y <sup>*</sup> | y <sup>*++</sup> | y <sup>0</sup> | y <sup>0++</sup> | # |
|---|----------------|-----------------|-----------------|----------------|------------------|----------------|------------------|------|-----------------|-----------------|----------------|------------------|----------------|------------------|---|
| 1 | <b>86.0964</b> | 114.0913        | 57.5493         |                |                  |                |                  | I    |                 |                 |                |                  |                |                  | 9 |
| 2 | 101.0709       | <b>242.1499</b> | 121.5786        | 225.1234       | 113.0653         |                |                  | Q    | <b>971.4905</b> | 486.2489        | 954.4639       | 477.7356         | 953.4799       | <b>477.2436</b>  | 8 |
| 3 | <b>86.0964</b> | 355.2340        | 178.1206        | 338.2074       | 169.6074         |                |                  | L    | <b>843.4319</b> | 422.2196        | 826.4054       | 413.7063         | 825.4213       | 413.2143         | 7 |
| 4 | 87.0553        | 469.2769        | 235.1421        | 452.2504       | 226.6288         |                |                  | N    | <b>730.3478</b> | 365.6776        | 713.3213       | 357.1643         | 712.3373       | 356.6723         | 6 |
| 5 | 87.0553        | 583.3198        | 292.1636        | 566.2933       | 283.6503         |                |                  | N    | <b>616.3049</b> | 308.6561        | 599.2784       | 300.1428         | 598.2944       | 299.6508         | 5 |
| 6 | 70.0651        | 680.3726        | 340.6899        | 663.3461       | 332.1767         |                |                  | P    | <b>502.2620</b> | 251.6346        | 485.2354       | 243.1214         | 484.2514       | 242.6293         | 4 |
| 7 | 74.0600        | 781.4203        | 391.2138        | 764.3937       | 382.7005         | 763.4097       | 382.2085         | T    | <b>405.2092</b> | 203.1083        | 388.1827       | 194.5950         | 387.1987       | 194.1030         | 3 |
| 8 | 102.0550       | 910.4629        | 455.7351        | 893.4363       | 447.2218         | 892.4523       | 446.7298         | E    | 304.1615        | 152.5844        | 287.1350       | 144.0711         | 286.1510       | 143.5791         | 2 |
| 9 | 129.1135       |                 |                 |                |                  |                |                  | R    | <b>175.1190</b> | 88.0631         | 158.0924       | 79.5498          |                |                  | 1 |

MS/MS Fragmentation of **LLFEGAGSNPGDK**

Found in **P61421**, P61421|VA0D1\_HUMAN Vacuolar proton pump subunit d 1 OS=Homo sapiens  
GN=ATP6V0D1 PE=1 SV=1

Match to Query 558: 1303.595526 from(652.805039,2+)

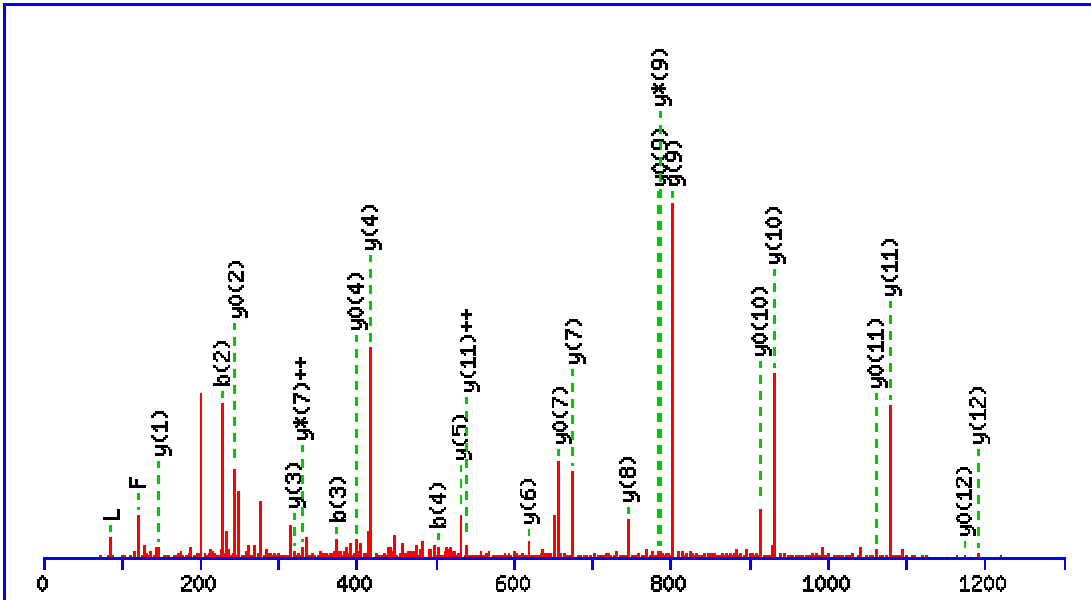

Monoisotopic mass of neutral peptide Mr(calc): 1303.6408

Fixed modifications: Carbamidomethyl (C)

Ions Score: 60 Expect: 7.9e-005

Matches (Bold Red): 27/133 fragment ions using 75 most intense peaks

| #  | Immon.          | b               | b <sup>++</sup> | b*        | b <sup>+++</sup> | b <sup>0</sup> | b <sup>0++</sup> | Seq. | y                | y <sup>++</sup> | y*              | y <sup>+++</sup> | y <sup>0</sup>   | y <sup>0++</sup> | #  |
|----|-----------------|-----------------|-----------------|-----------|------------------|----------------|------------------|------|------------------|-----------------|-----------------|------------------|------------------|------------------|----|
| 1  | <b>86.0964</b>  | 114.0913        | 57.5493         |           |                  |                |                  | L    |                  |                 |                 |                  |                  |                  | 13 |
| 2  | <b>86.0964</b>  | <b>227.1754</b> | 114.0913        |           |                  |                |                  | L    | <b>1191.5640</b> | 596.2857        | 1174.5375       | 587.7724         | <b>1173.5535</b> | 587.2804         | 12 |
| 3  | <b>120.0808</b> | <b>374.2438</b> | 187.6255        |           |                  |                |                  | F    | <b>1078.4800</b> | <b>539.7436</b> | 1061.4534       | 531.2304         | <b>1060.4694</b> | 530.7383         | 11 |
| 4  | 102.0550        | <b>503.2864</b> | 252.1468        |           |                  | 485.2758       | 243.1416         | E    | <b>931.4116</b>  | 466.2094        | 914.3850        | 457.6961         | <b>913.4010</b>  | 457.2041         | 10 |
| 5  | 30.0338         | 560.3079        | 280.6576        |           |                  | 542.2973       | 271.6523         | G    | <b>802.3690</b>  | 401.6881        | <b>785.3424</b> | 393.1748         | <b>784.3584</b>  | 392.6828         | 9  |
| 6  | 44.0495         | 631.3450        | 316.1761        |           |                  | 613.3344       | 307.1709         | A    | <b>745.3475</b>  | 373.1774        | 728.3210        | 364.6641         | 727.3369         | 364.1721         | 8  |
| 7  | 30.0338         | 688.3665        | 344.6869        |           |                  | 670.3559       | 335.6816         | G    | <b>674.3104</b>  | 337.6588        | 657.2838        | <b>329.1456</b>  | <b>656.2998</b>  | 328.6536         | 7  |
| 8  | 60.0444         | 775.3985        | 388.2029        |           |                  | 757.3879       | 379.1976         | S    | <b>617.2889</b>  | 309.1481        | 600.2624        | 300.6348         | 599.2784         | 300.1428         | 6  |
| 9  | 87.0553         | 889.4414        | 445.2243        | 872.4149  | 436.7111         | 871.4308       | 436.2191         | N    | <b>530.2569</b>  | 265.6321        | 513.2304        | 257.1188         | 512.2463         | 256.6268         | 5  |
| 10 | 70.0651         | 986.4942        | 493.7507        | 969.4676  | 485.2374         | 968.4836       | 484.7454         | P    | <b>416.2140</b>  | 208.6106        | 399.1874        | 200.0974         | <b>398.2034</b>  | 199.6053         | 4  |
| 11 | 30.0338         | 1043.5156       | 522.2615        | 1026.4891 | 513.7482         | 1025.5051      | 513.2562         | G    | <b>319.1612</b>  | 160.0842        | 302.1347        | 151.5710         | 301.1506         | 151.0790         | 3  |
| 12 | 88.0393         | 1158.5426       | 579.7749        | 1141.5160 | 571.2617         | 1140.5320      | 570.7696         | D    | 262.1397         | 131.5735        | 245.1132        | 123.0602         | <b>244.1292</b>  | 122.5682         | 2  |
| 13 | 101.1073        |                 |                 |           |                  |                |                  | K    | <b>147.1128</b>  | 74.0600         | 130.0863        | 65.5468          |                  |                  | 1  |

MS/MS Fragmentation of **IFEGTNDILR**

Found in **P49748**, P49748|ACADV\_HUMAN Very long-chain specific acyl-CoA dehydrogenase, mitochondrial OS=Homo sapiens GN=ACADVL PE=1 SV=1

Match to Query 331: 1176.546026 from(589.280289,2+)

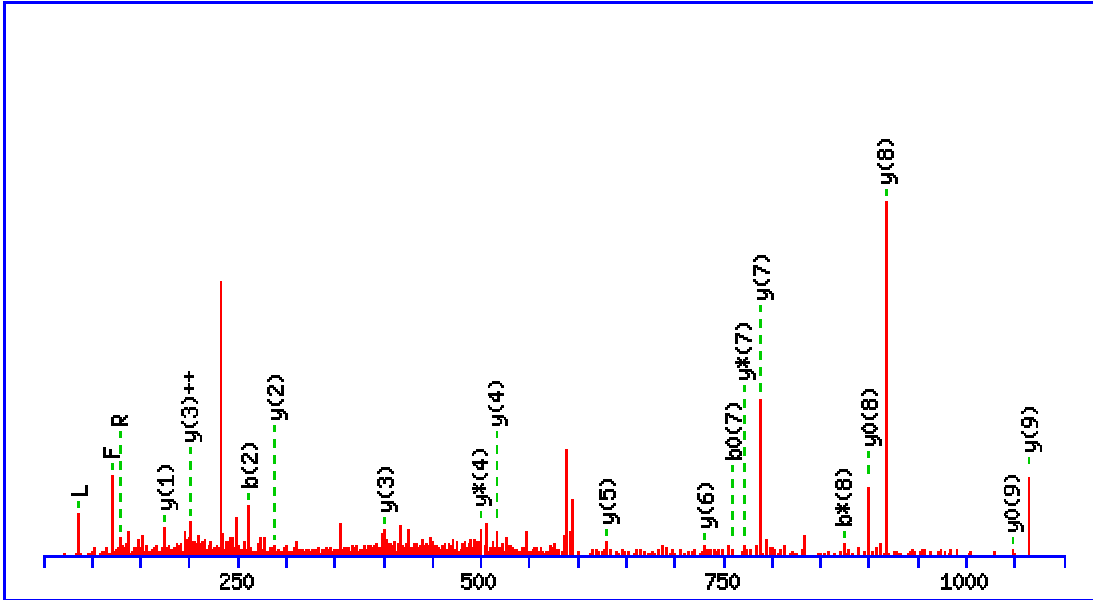

Monoisotopic mass of neutral peptide Mr(calc): 1176.6139

Fixed modifications: Carbamidomethyl (C)

Ions Score: 36 Expect: 0.019

Matches (Bold Red): 22/98 fragment ions using 61 most intense peaks

| #  | Immon.          | b               | b <sup>++</sup> | b*              | b <sup>*++</sup> | b <sup>0</sup>  | b <sup>0++</sup> | Seq. | y                | y <sup>++</sup> | y*              | y <sup>*++</sup> | y <sup>0</sup>   | y <sup>0++</sup> | #  |
|----|-----------------|-----------------|-----------------|-----------------|------------------|-----------------|------------------|------|------------------|-----------------|-----------------|------------------|------------------|------------------|----|
| 1  | <b>86.0964</b>  | 114.0913        | 57.5493         |                 |                  |                 |                  | I    |                  |                 |                 |                  |                  |                  | 10 |
| 2  | <b>120.0808</b> | <b>261.1598</b> | 131.0835        |                 |                  |                 |                  | F    | <b>1064.5371</b> | 532.7722        | 1047.5106       | 524.2589         | <b>1046.5265</b> | 523.7669         | 9  |
| 3  | 102.0550        | 390.2023        | 195.6048        |                 |                  | 372.1918        | 186.5995         | E    | <b>917.4687</b>  | 459.2380        | 900.4421        | 450.7247         | <b>899.4581</b>  | 450.2327         | 8  |
| 4  | 30.0338         | 447.2238        | 224.1155        |                 |                  | 429.2132        | 215.1103         | G    | <b>788.4261</b>  | 394.7167        | <b>771.3995</b> | 386.2034         | 770.4155         | 385.7114         | 7  |
| 5  | 74.0600         | 548.2715        | 274.6394        |                 |                  | 530.2609        | 265.6341         | T    | <b>731.4046</b>  | 366.2060        | 714.3781        | 357.6927         | 713.3941         | 357.2007         | 6  |
| 6  | 87.0553         | 662.3144        | 331.6608        | 645.2879        | 323.1476         | 644.3039        | 322.6556         | N    | <b>630.3569</b>  | 315.6821        | 613.3304        | 307.1688         | 612.3464         | 306.6768         | 5  |
| 7  | 88.0393         | 777.3414        | 389.1743        | 760.3148        | 380.6610         | <b>759.3308</b> | 380.1690         | D    | <b>516.3140</b>  | 258.6606        | <b>499.2875</b> | 250.1474         | 498.3035         | 249.6554         | 4  |
| 8  | <b>86.0964</b>  | 890.4254        | 445.7163        | <b>873.3989</b> | 437.2031         | 872.4149        | 436.7111         | I    | <b>401.2871</b>  | <b>201.1472</b> | 384.2605        | 192.6339         |                  |                  | 3  |
| 9  | <b>86.0964</b>  | 1003.5095       | 502.2584        | 986.4829        | 493.7451         | 985.4989        | 493.2531         | L    | <b>288.2030</b>  | 144.6051        | 271.1765        | 136.0919         |                  |                  | 2  |
| 10 | <b>129.1135</b> |                 |                 |                 |                  |                 |                  | R    | <b>175.1190</b>  | 88.0631         | 158.0924        | 79.5498          |                  |                  | 1  |

MS/MS Fragmentation of **GNNFLYTNGK**

Found in **O75083**, O75083|WDR1\_HUMAN WD repeat-containing protein 1 OS=Homo sapiens GN=WDR1 PE=1 SV=4

Match to Query 304: 1126.491692 from(564.253122,2+)

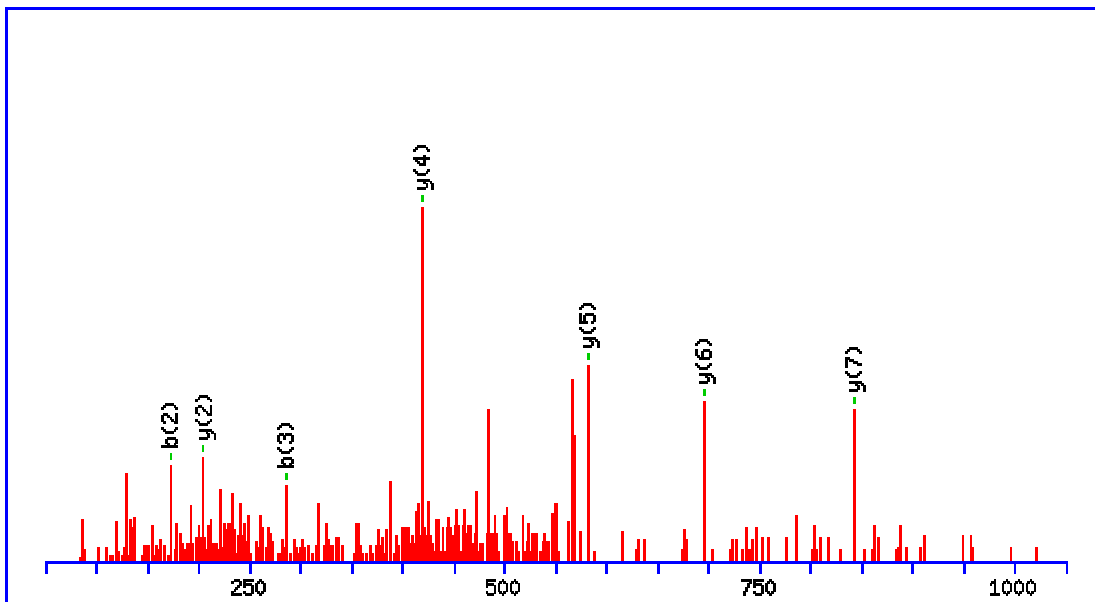

**Monoisotopic mass of neutral peptide Mr(calc):** 1126.5407

**Fixed modifications:** Carbamidomethyl (C)

**Ions Score:** 34 **Expect:** 0.027

**Matches (Bold Red):** 7/98 fragment ions using 14 most intense peaks

| #  | Immon.   | b               | b <sup>++</sup> | b*       | b <sup>***</sup> | b <sup>0</sup> | b <sup>0++</sup> | Seq.     | y               | y <sup>++</sup> | y*        | y <sup>***</sup> | y <sup>0</sup> | y <sup>0++</sup> | #  |
|----|----------|-----------------|-----------------|----------|------------------|----------------|------------------|----------|-----------------|-----------------|-----------|------------------|----------------|------------------|----|
| 1  | 30.0338  | 58.0287         | 29.5180         |          |                  |                |                  | <b>G</b> |                 |                 |           |                  |                |                  | 10 |
| 2  | 87.0553  | <b>172.0717</b> | 86.5395         | 155.0451 | 78.0262          |                |                  | <b>N</b> | 1070.5265       | 535.7669        | 1053.5000 | 527.2536         | 1052.5160      | 526.7616         | 9  |
| 3  | 87.0553  | <b>286.1146</b> | 143.5609        | 269.0880 | 135.0477         |                |                  | <b>N</b> | 956.4836        | 478.7454        | 939.4571  | 470.2322         | 938.4730       | 469.7402         | 8  |
| 4  | 120.0808 | 433.1830        | 217.0951        | 416.1565 | 208.5819         |                |                  | <b>F</b> | <b>842.4407</b> | 421.7240        | 825.4141  | 413.2107         | 824.4301       | 412.7187         | 7  |
| 5  | 86.0964  | 546.2671        | 273.6372        | 529.2405 | 265.1239         |                |                  | <b>L</b> | <b>695.3723</b> | 348.1898        | 678.3457  | 339.6765         | 677.3617       | 339.1845         | 6  |
| 6  | 136.0757 | 709.3304        | 355.1688        | 692.3039 | 346.6556         |                |                  | <b>Y</b> | <b>582.2882</b> | 291.6477        | 565.2617  | 283.1345         | 564.2776       | 282.6425         | 5  |
| 7  | 74.0600  | 810.3781        | 405.6927        | 793.3515 | 397.1794         | 792.3675       | 396.6874         | <b>T</b> | <b>419.2249</b> | 210.1161        | 402.1983  | 201.6028         | 401.2143       | 201.1108         | 4  |
| 8  | 87.0553  | 924.4210        | 462.7141        | 907.3945 | 454.2009         | 906.4104       | 453.7089         | <b>N</b> | 318.1772        | 159.5922        | 301.1506  | 151.0790         |                |                  | 3  |
| 9  | 30.0338  | 981.4425        | 491.2249        | 964.4159 | 482.7116         | 963.4319       | 482.2196         | <b>G</b> | <b>204.1343</b> | 102.5708        | 187.1077  | 94.0575          |                |                  | 2  |
| 10 | 101.1073 |                 |                 |          |                  |                |                  | <b>K</b> | 147.1128        | 74.0600         | 130.0863  | 65.5468          |                |                  | 1  |

MS/MS Fragmentation of **GPPASSPAPAK**

Found in **Q15942**, Q15942|ZYX\_HUMAN Zyxin OS=Homo sapiens GN=ZYX PE=1 SV=1

Match to Query 436: 1075.530000 from(538.772276,2+)

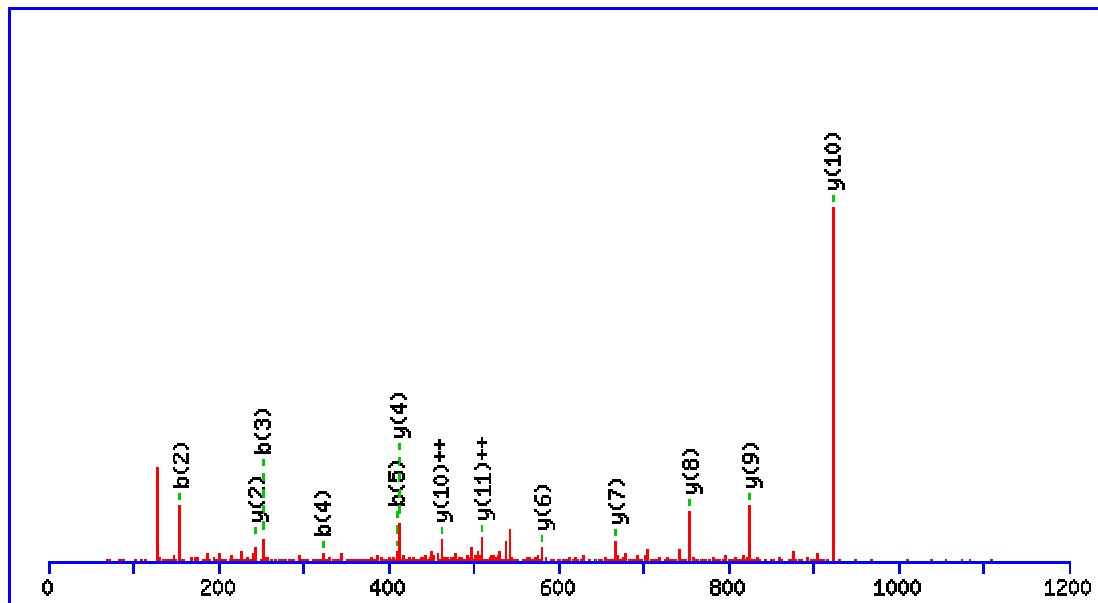

Monoisotopic mass of neutral peptide Mr(calc): 1075.5662

Fixed modifications: Carbamidomethyl (C)

Ions Score: 47 Expect: 0.0015

Matches (Bold Red): 13/102 fragment ions using 26 most intense peaks

| #  | Immon.   | b               | b <sup>++</sup> | b <sup>0</sup> | b <sup>0++</sup> | Seq. | y               | y <sup>++</sup> | y <sup>*</sup> | y <sup>*++</sup> | y <sup>0</sup> | y <sup>0++</sup> | #  |
|----|----------|-----------------|-----------------|----------------|------------------|------|-----------------|-----------------|----------------|------------------|----------------|------------------|----|
| 1  | 30.0338  | 58.0287         | 29.5180         |                |                  | G    |                 |                 |                |                  |                |                  | 12 |
| 2  | 70.0651  | <b>155.0815</b> | 78.0444         |                |                  | P    | 1019.5520       | <b>510.2796</b> | 1002.5255      | 501.7664         | 1001.5415      | 501.2744         | 11 |
| 3  | 70.0651  | <b>252.1343</b> | 126.5708        |                |                  | P    | <b>922.4993</b> | <b>461.7533</b> | 905.4727       | 453.2400         | 904.4887       | 452.7480         | 10 |
| 4  | 44.0495  | <b>323.1714</b> | 162.0893        |                |                  | A    | <b>825.4465</b> | 413.2269        | 808.4199       | 404.7136         | 807.4359       | 404.2216         | 9  |
| 5  | 60.0444  | <b>410.2034</b> | 205.6053        | 392.1928       | 196.6001         | S    | <b>754.4094</b> | 377.7083        | 737.3828       | 369.1951         | 736.3988       | 368.7030         | 8  |
| 6  | 60.0444  | 497.2354        | 249.1214        | 479.2249       | 240.1161         | S    | <b>667.3774</b> | 334.1923        | 650.3508       | 325.6790         | 649.3668       | 325.1870         | 7  |
| 7  | 70.0651  | 594.2882        | 297.6477        | 576.2776       | 288.6425         | P    | <b>580.3453</b> | 290.6763        | 563.3188       | 282.1630         |                |                  | 6  |
| 8  | 44.0495  | 665.3253        | 333.1663        | 647.3148       | 324.1610         | A    | 483.2926        | 242.1499        | 466.2660       | 233.6366         |                |                  | 5  |
| 9  | 70.0651  | 762.3781        | 381.6927        | 744.3675       | 372.6874         | P    | <b>412.2554</b> | 206.6314        | 395.2289       | 198.1181         |                |                  | 4  |
| 10 | 44.0495  | 833.4152        | 417.2112        | 815.4046       | 408.2060         | A    | 315.2027        | 158.1050        | 298.1761       | 149.5917         |                |                  | 3  |
| 11 | 70.0651  | 930.4680        | 465.7376        | 912.4574       | 456.7323         | P    | <b>244.1656</b> | 122.5864        | 227.1390       | 114.0731         |                |                  | 2  |
| 12 | 101.1073 |                 |                 |                |                  | K    | 147.1128        | 74.0600         | 130.0863       | 65.5468          |                |                  | 1  |



MS/MS Fragmentation of **TPGPGAQSALR**

Found in **P62263**, P62263|RS14\_HUMAN 40S ribosomal protein S14 OS=Homo sapiens GN=RPS14 PE=1 SV=3

Match to Query 108: 1053.428150 from(527.721351,2+)

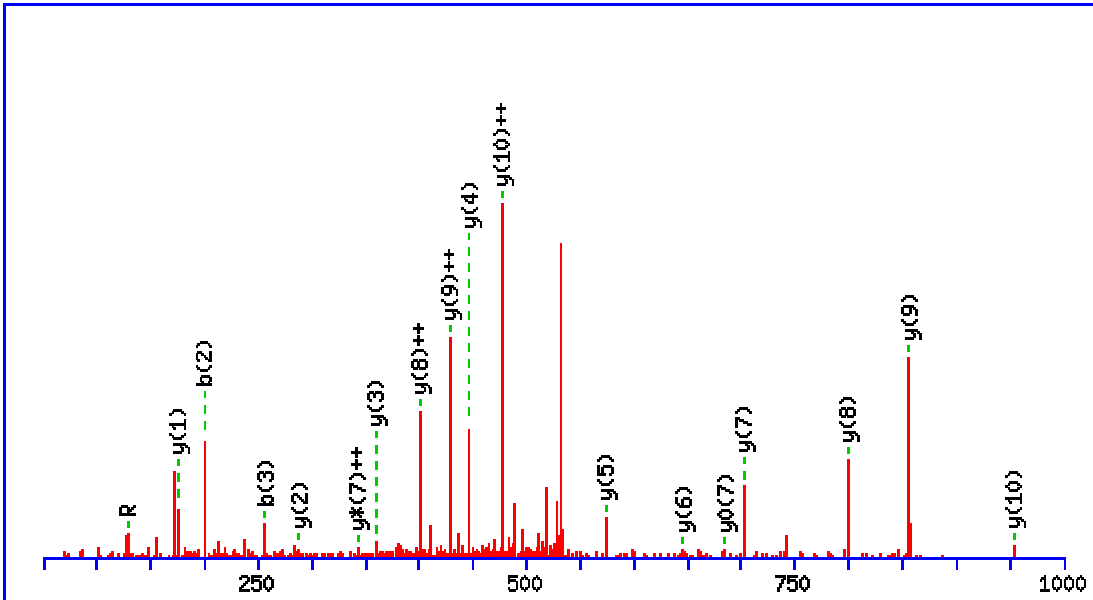

Monoisotopic mass of neutral peptide Mr(calc): 1053.5567

Fixed modifications: Carbamidomethyl (C)

Ions Score: 80 Expect: 5.9e-007

Matches (**Bold Red**): 18/113 fragment ions using 37 most intense peaks

| #  | Immon.          | b               | b <sup>++</sup> | b*       | b <sup>+++</sup> | b <sup>0</sup> | b <sup>0++</sup> | Seq. | y               | y <sup>++</sup> | y*       | y <sup>***</sup> | y <sup>0</sup>  | y <sup>0++</sup> | #  |
|----|-----------------|-----------------|-----------------|----------|------------------|----------------|------------------|------|-----------------|-----------------|----------|------------------|-----------------|------------------|----|
| 1  | 74.0600         | 102.0550        | 51.5311         |          |                  | 84.0444        | 42.5258          | T    |                 |                 |          |                  |                 |                  | 11 |
| 2  | 70.0651         | <b>199.1077</b> | 100.0575        |          |                  | 181.0972       | 91.0522          | P    | <b>953.5163</b> | <b>477.2618</b> | 936.4898 | 468.7485         | 935.5057        | 468.2565         | 10 |
| 3  | 30.0338         | <b>256.1292</b> | 128.5682        |          |                  | 238.1186       | 119.5629         | G    | <b>856.4635</b> | <b>428.7354</b> | 839.4370 | 420.2221         | 838.4530        | 419.7301         | 9  |
| 4  | 70.0651         | 353.1819        | 177.0946        |          |                  | 335.1714       | 168.0893         | P    | <b>799.4421</b> | <b>400.2247</b> | 782.4155 | 391.7114         | 781.4315        | 391.2194         | 8  |
| 5  | 30.0338         | 410.2034        | 205.6053        |          |                  | 392.1928       | 196.6001         | G    | <b>702.3893</b> | 351.6983        | 685.3628 | <b>343.1850</b>  | <b>684.3787</b> | 342.6930         | 7  |
| 6  | 44.0495         | 481.2405        | 241.1239        |          |                  | 463.2300       | 232.1186         | A    | <b>645.3679</b> | 323.1876        | 628.3413 | 314.6743         | 627.3573        | 314.1823         | 6  |
| 7  | 101.0709        | 609.2991        | 305.1532        | 592.2726 | 296.6399         | 591.2885       | 296.1479         | Q    | <b>574.3307</b> | 287.6690        | 557.3042 | 279.1557         | 556.3202        | 278.6637         | 5  |
| 8  | 60.0444         | 696.3311        | 348.6692        | 679.3046 | 340.1559         | 678.3206       | 339.6639         | S    | <b>446.2722</b> | 223.6397        | 429.2456 | 215.1264         | 428.2616        | 214.6344         | 4  |
| 9  | 44.0495         | 767.3682        | 384.1878        | 750.3417 | 375.6745         | 749.3577       | 375.1825         | A    | <b>359.2401</b> | 180.1237        | 342.2136 | 171.6104         |                 |                  | 3  |
| 10 | 86.0964         | 880.4523        | 440.7298        | 863.4258 | 432.2165         | 862.4417       | 431.7245         | L    | <b>288.2030</b> | 144.6051        | 271.1765 | 136.0919         |                 |                  | 2  |
| 11 | <b>129.1135</b> |                 |                 |          |                  |                |                  | R    | <b>175.1190</b> | 88.0631         | 158.0924 | 79.5498          |                 |                  | 1  |

### MS/MS Fragmentation of **LGPLVEQGR**

Found in **P02649**, P02649|APOE\_HUMAN Apolipoprotein E OS=Homo sapiens GN=APOE PE=1 SV=1

Match to Query 273: 967.468728 from(484.741640,2+)

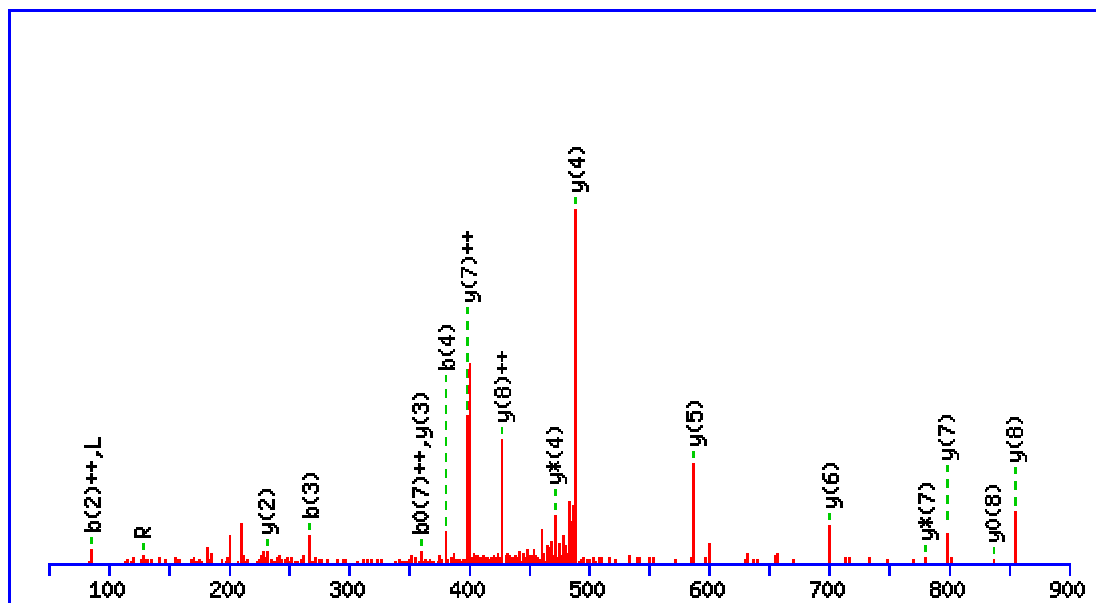

Monoisotopic mass of neutral peptide Mr(calc): 967.5451

Fixed modifications: Carbamidomethyl (C)

Ions Score: 45 Expect: 0.002

Matches (**Bold Red**): 19/77 fragment ions using 32 most intense peaks

| # | Immon.          | b               | b <sup>++</sup> | b*       | b <sup>*++</sup> | b <sup>0</sup> | b <sup>0++</sup> | Seq. | y               | y <sup>++</sup> | y*              | y <sup>*++</sup> | y <sup>0</sup>  | y <sup>0++</sup> | # |
|---|-----------------|-----------------|-----------------|----------|------------------|----------------|------------------|------|-----------------|-----------------|-----------------|------------------|-----------------|------------------|---|
| 1 | <b>86.0964</b>  | 114.0913        | 57.5493         |          |                  |                |                  | L    |                 |                 |                 |                  |                 |                  | 9 |
| 2 | 30.0338         | 171.1128        | <b>86.0600</b>  |          |                  |                |                  | G    | <b>855.4683</b> | <b>428.2378</b> | 838.4417        | 419.7245         | <b>837.4577</b> | 419.2325         | 8 |
| 3 | 70.0651         | <b>268.1656</b> | 134.5864        |          |                  |                |                  | P    | <b>798.4468</b> | <b>399.7271</b> | <b>781.4203</b> | 391.2138         | 780.4363        | 390.7218         | 7 |
| 4 | <b>86.0964</b>  | <b>381.2496</b> | 191.1285        |          |                  |                |                  | L    | <b>701.3941</b> | 351.2007        | 684.3675        | 342.6874         | 683.3835        | 342.1954         | 6 |
| 5 | 72.0808         | 480.3180        | 240.6627        |          |                  |                |                  | V    | <b>588.3100</b> | 294.6586        | 571.2835        | 286.1454         | 570.2994        | 285.6534         | 5 |
| 6 | 102.0550        | 609.3606        | 305.1840        |          |                  | 591.3501       | 296.1787         | E    | <b>489.2416</b> | 245.1244        | <b>472.2150</b> | 236.6112         | 471.2310        | 236.1191         | 4 |
| 7 | 101.0709        | 737.4192        | 369.2132        | 720.3927 | 360.7000         | 719.4087       | <b>360.2080</b>  | Q    | <b>360.1990</b> | 180.6031        | 343.1724        | 172.0899         |                 |                  | 3 |
| 8 | 30.0338         | 794.4407        | 397.7240        | 777.4141 | 389.2107         | 776.4301       | 388.7187         | G    | <b>232.1404</b> | 116.5738        | 215.1139        | 108.0606         |                 |                  | 2 |
| 9 | <b>129.1135</b> |                 |                 |          |                  |                |                  | R    | 175.1190        | 88.0631         | 158.0924        | 79.5498          |                 |                  | 1 |

MS/MS Fragmentation of **AATVGS LAGQPLQER**

Found in **P02649**, P02649|APOE\_HUMAN Apolipoprotein E OS=Homo sapiens GN=APOE PE=1 SV=1

Match to Query 469: 1496.789604 from(749.402078,2+)

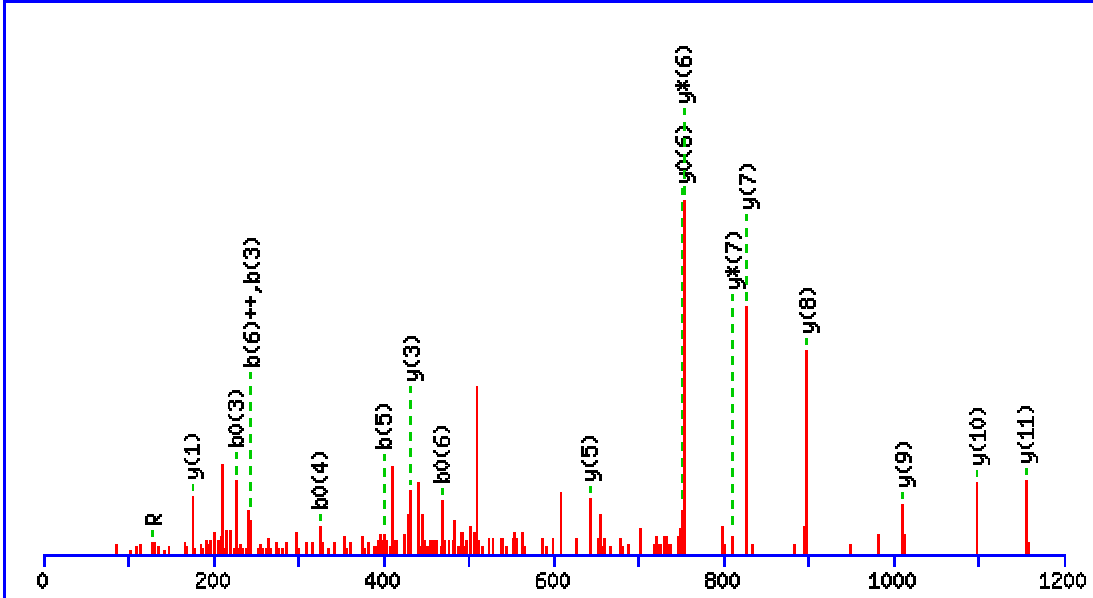

Monoisotopic mass of neutral peptide Mr(calc): 1496.7947

Fixed modifications: Carbamidomethyl (C)

Ions Score: 34 Expect: 0.025

Matches (Bold Red): 18/159 fragment ions using 39 most intense peaks

| #  | Immon.          | b               | b <sup>++</sup> | b*        | b <sup>*++</sup> | b <sup>0</sup>  | b <sup>0++</sup> | Seq. | y                | y <sup>++</sup> | y*              | y <sup>*++</sup> | y <sup>0</sup>  | y <sup>0++</sup> | #  |
|----|-----------------|-----------------|-----------------|-----------|------------------|-----------------|------------------|------|------------------|-----------------|-----------------|------------------|-----------------|------------------|----|
| 1  | 44.0495         | 72.0444         | 36.5258         |           |                  |                 |                  | A    |                  |                 |                 |                  |                 |                  | 15 |
| 2  | 44.0495         | 143.0815        | 72.0444         |           |                  |                 |                  | A    | 1426.7649        | 713.8861        | 1409.7383       | 705.3728         | 1408.7543       | 704.8808         | 14 |
| 3  | 74.0600         | <b>244.1292</b> | 122.5682        |           |                  | <b>226.1186</b> | 113.5629         | T    | 1355.7278        | 678.3675        | 1338.7012       | 669.8542         | 1337.7172       | 669.3622         | 13 |
| 4  | 72.0808         | 343.1976        | 172.1024        |           |                  | <b>325.1870</b> | 163.0972         | V    | 1254.6801        | 627.8437        | 1237.6535       | 619.3304         | 1236.6695       | 618.8384         | 12 |
| 5  | 30.0338         | <b>400.2191</b> | 200.6132        |           |                  | 382.2085        | 191.6079         | G    | <b>1155.6117</b> | 578.3095        | 1138.5851       | 569.7962         | 1137.6011       | 569.3042         | 11 |
| 6  | 60.0444         | 487.2511        | <b>244.1292</b> |           |                  | <b>469.2405</b> | 235.1239         | S    | <b>1098.5902</b> | 549.7987        | 1081.5637       | 541.2855         | 1080.5796       | 540.7935         | 10 |
| 7  | 86.0964         | 600.3352        | 300.6712        |           |                  | 582.3246        | 291.6659         | L    | <b>1011.5582</b> | 506.2827        | 994.5316        | 497.7694         | 993.5476        | 497.2774         | 9  |
| 8  | 44.0495         | 671.3723        | 336.1898        |           |                  | 653.3617        | 327.1845         | A    | <b>898.4741</b>  | 449.7407        | 881.4476        | 441.2274         | 880.4635        | 440.7354         | 8  |
| 9  | 30.0338         | 728.3937        | 364.7005        |           |                  | 710.3832        | 355.6952         | G    | <b>827.4370</b>  | 414.2221        | <b>810.4104</b> | 405.7089         | 809.4264        | 405.2169         | 7  |
| 10 | 101.0709        | 856.4523        | 428.7298        | 839.4258  | 420.2165         | 838.4417        | 419.7245         | Q    | 770.4155         | 385.7114        | <b>753.3890</b> | 377.1981         | <b>752.4050</b> | 376.7061         | 6  |
| 11 | 70.0651         | 953.5051        | 477.2562        | 936.4785  | 468.7429         | 935.4945        | 468.2509         | P    | <b>642.3570</b>  | 321.6821        | 625.3304        | 313.1688         | 624.3464        | 312.6768         | 5  |
| 12 | 86.0964         | 1066.5891       | 533.7982        | 1049.5626 | 525.2849         | 1048.5786       | 524.7929         | L    | 545.3042         | 273.1557        | 528.2776        | 264.6425         | 527.2936        | 264.1504         | 4  |
| 13 | 101.0709        | 1194.6477       | 597.8275        | 1177.6212 | 589.3142         | 1176.6372       | 588.8222         | Q    | <b>432.2201</b>  | 216.6137        | 415.1936        | 208.1004         | 414.2096        | 207.6084         | 3  |
| 14 | 102.0550        | 1323.6903       | 662.3488        | 1306.6638 | 653.8355         | 1305.6797       | 653.3435         | E    | 304.1615         | 152.5844        | 287.1350        | 144.0711         | 286.1510        | 143.5791         | 2  |
| 15 | <b>129.1135</b> |                 |                 |           |                  |                 |                  | R    | <b>175.1190</b>  | 88.0631         | 158.0924        | 79.5498          |                 |                  | 1  |

MS/MS Fragmentation of **TEAVASSLYDILAR**

Found in **P16278**, P16278|BGAL\_HUMAN Beta-galactosidase OS=Homo sapiens GN=GLB1 PE=1 SV=1

Match to Query 371: 1507.852186 from(754.933369,2+)

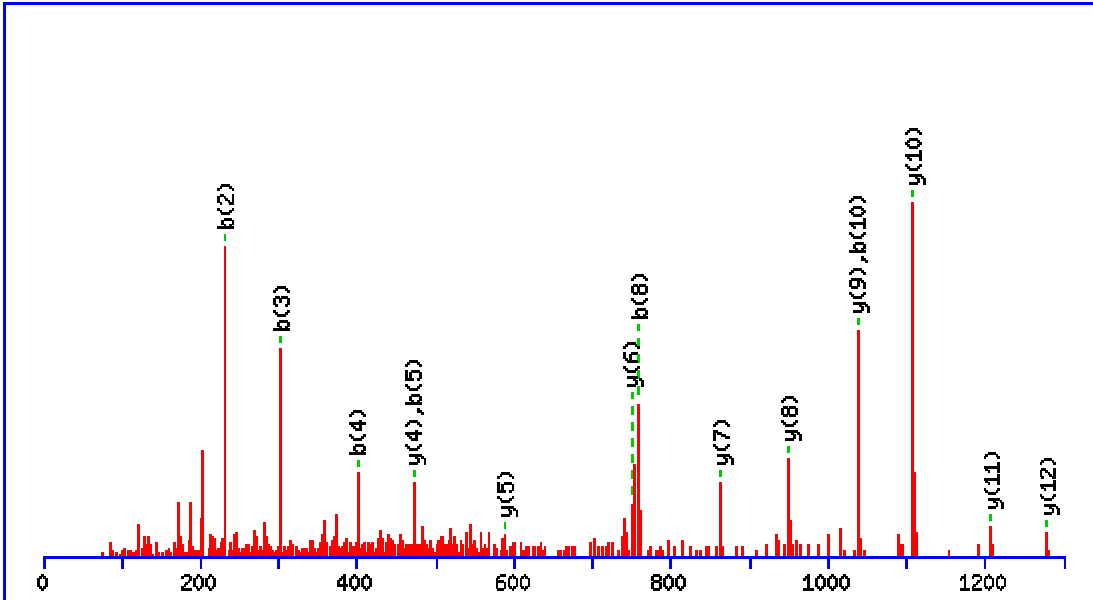

**Monoisotopic mass of neutral peptide Mr(calc):** 1507.7882

**Fixed modifications:** Carbamidomethyl (C)

**Ions Score:** 60 **Expect:** 6.7e-005

**Matches (Bold Red):** 15/136 fragment ions using 28 most intense peaks

| #  | Immon.   | b                | b <sup>+</sup> | b <sup>0</sup> | b <sup>0+</sup> | Seq. | y                | y <sup>+</sup> | y <sup>*</sup> | y <sup>+</sup> | y <sup>0</sup> | y <sup>0+</sup> | #  |
|----|----------|------------------|----------------|----------------|-----------------|------|------------------|----------------|----------------|----------------|----------------|-----------------|----|
| 1  | 74.0600  | 102.0550         | 51.5311        | 84.0444        | 42.5258         | T    |                  |                |                |                |                |                 | 14 |
| 2  | 102.0550 | <b>231.0975</b>  | 116.0524       | 213.0870       | 107.0471        | E    | 1407.7478        | 704.3775       | 1390.7213      | 695.8643       | 1389.7373      | 695.3723        | 13 |
| 3  | 44.0495  | <b>302.1347</b>  | 151.5710       | 284.1241       | 142.5657        | A    | <b>1278.7052</b> | 639.8563       | 1261.6787      | 631.3430       | 1260.6947      | 630.8510        | 12 |
| 4  | 72.0808  | <b>401.2031</b>  | 201.1052       | 383.1925       | 192.0999        | V    | <b>1207.6681</b> | 604.3377       | 1190.6416      | 595.8244       | 1189.6575      | 595.3324        | 11 |
| 5  | 44.0495  | <b>472.2402</b>  | 236.6237       | 454.2296       | 227.6185        | A    | <b>1108.5997</b> | 554.8035       | 1091.5732      | 546.2902       | 1090.5891      | 545.7982        | 10 |
| 6  | 60.0444  | 559.2722         | 280.1397       | 541.2617       | 271.1345        | S    | <b>1037.5626</b> | 519.2849       | 1020.5360      | 510.7717       | 1019.5520      | 510.2796        | 9  |
| 7  | 60.0444  | 646.3042         | 323.6558       | 628.2937       | 314.6505        | S    | <b>950.5306</b>  | 475.7689       | 933.5040       | 467.2556       | 932.5200       | 466.7636        | 8  |
| 8  | 86.0964  | <b>759.3883</b>  | 380.1978       | 741.3777       | 371.1925        | L    | <b>863.4985</b>  | 432.2529       | 846.4720       | 423.7396       | 845.4880       | 423.2476        | 7  |
| 9  | 136.0757 | 922.4516         | 461.7295       | 904.4411       | 452.7242        | Y    | <b>750.4145</b>  | 375.7109       | 733.3879       | 367.1976       | 732.4039       | 366.7056        | 6  |
| 10 | 88.0393  | <b>1037.4786</b> | 519.2429       | 1019.4680      | 510.2376        | D    | <b>587.3511</b>  | 294.1792       | 570.3246       | 285.6659       | 569.3406       | 285.1739        | 5  |
| 11 | 86.0964  | 1150.5626        | 575.7850       | 1132.5521      | 566.7797        | I    | <b>472.3242</b>  | 236.6657       | 455.2976       | 228.1525       |                |                 | 4  |
| 12 | 86.0964  | 1263.6467        | 632.3270       | 1245.6361      | 623.3217        | L    | 359.2401         | 180.1237       | 342.2136       | 171.6104       |                |                 | 3  |
| 13 | 44.0495  | 1334.6838        | 667.8456       | 1316.6733      | 658.8403        | A    | 246.1561         | 123.5817       | 229.1295       | 115.0684       |                |                 | 2  |
| 14 | 129.1135 |                  |                |                |                 | R    | 175.1190         | 88.0631        | 158.0924       | 79.5498        |                |                 | 1  |

MS/MS Fragmentation of **VLDIATINK**

Found in **P07686**, P07686|HEXB\_HUMAN Beta-hexosaminidase subunit beta OS=Homo sapiens GN=HEXB PE=1 SV=3

Match to Query 387: 1098.663352 from(550.338952,2+)

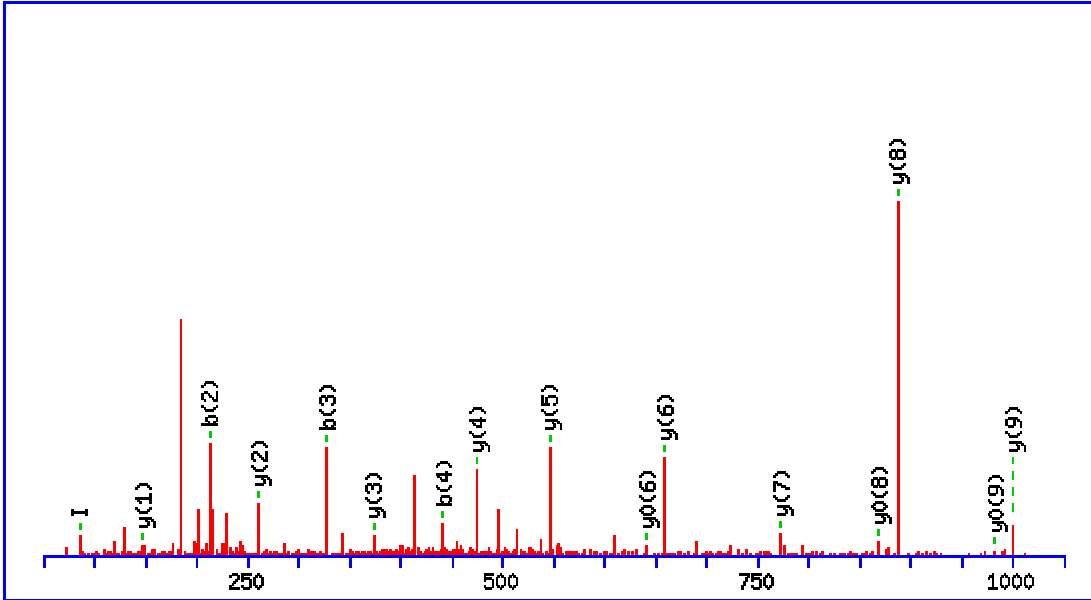

Monoisotopic mass of neutral peptide  $M_r(\text{calc})$ : 1098.6648

Fixed modifications: Carbamidomethyl (C)

Ions Score: 56 Expect: 0.00019

Matches (Bold Red): 19/92 fragment ions using 43 most intense peaks

| #  | Immon.         | b               | b <sup>++</sup> | b <sup>*</sup> | b <sup>+++</sup> | b <sup>0</sup> | b <sup>0++</sup> | Seq. | y                | y <sup>++</sup> | y <sup>*</sup> | y <sup>+++</sup> | y <sup>0</sup>  | y <sup>0++</sup> | #  |
|----|----------------|-----------------|-----------------|----------------|------------------|----------------|------------------|------|------------------|-----------------|----------------|------------------|-----------------|------------------|----|
| 1  | 72.0808        | 100.0757        | 50.5415         |                |                  |                |                  | V    |                  |                 |                |                  |                 |                  | 10 |
| 2  | <b>86.0964</b> | <b>213.1598</b> | 107.0835        |                |                  |                |                  | L    | <b>1000.6037</b> | 500.8055        | 983.5772       | 492.2922         | <b>982.5932</b> | 491.8002         | 9  |
| 3  | 88.0393        | <b>328.1867</b> | 164.5970        |                |                  | 310.1761       | 155.5917         | D    | <b>887.5197</b>  | 444.2635        | 870.4931       | 435.7502         | <b>869.5091</b> | 435.2582         | 8  |
| 4  | <b>86.0964</b> | <b>441.2708</b> | 221.1390        |                |                  | 423.2602       | 212.1337         | I    | <b>772.4927</b>  | 386.7500        | 755.4662       | 378.2367         | 754.4822        | 377.7447         | 7  |
| 5  | <b>86.0964</b> | 554.3548        | 277.6811        |                |                  | 536.3443       | 268.6758         | I    | <b>659.4087</b>  | 330.2080        | 642.3821       | 321.6947         | <b>641.3981</b> | 321.2027         | 6  |
| 6  | 44.0495        | 625.3919        | 313.1996        |                |                  | 607.3814       | 304.1943         | A    | <b>546.3246</b>  | 273.6659        | 529.2980       | 265.1527         | 528.3140        | 264.6606         | 5  |
| 7  | 74.0600        | 726.4396        | 363.7234        |                |                  | 708.4291       | 354.7182         | T    | <b>475.2875</b>  | 238.1474        | 458.2609       | 229.6341         | 457.2769        | 229.1421         | 4  |
| 8  | <b>86.0964</b> | 839.5237        | 420.2655        |                |                  | 821.5131       | 411.2602         | I    | <b>374.2398</b>  | 187.6235        | 357.2132       | 179.1103         |                 |                  | 3  |
| 9  | 87.0553        | 953.5666        | 477.2869        | 936.5401       | 468.7737         | 935.5560       | 468.2817         | N    | <b>261.1557</b>  | 131.0815        | 244.1292       | 122.5682         |                 |                  | 2  |
| 10 | 101.1073       |                 |                 |                |                  |                |                  | K    | <b>147.1128</b>  | 74.0600         | 130.0863       | 65.5468          |                 |                  | 1  |

MS/MS Fragmentation of **IDPFVR**

Found in **P39656**, P39656|OST48\_HUMAN Dolichyl-diphosphooligosaccharide--protein glycosyltransferase 48 kDa subunit OS=Homo sapiens GN=DDOST PE=1 SV=2

Match to Query 86: 745.402394 from(373.708473,2+)

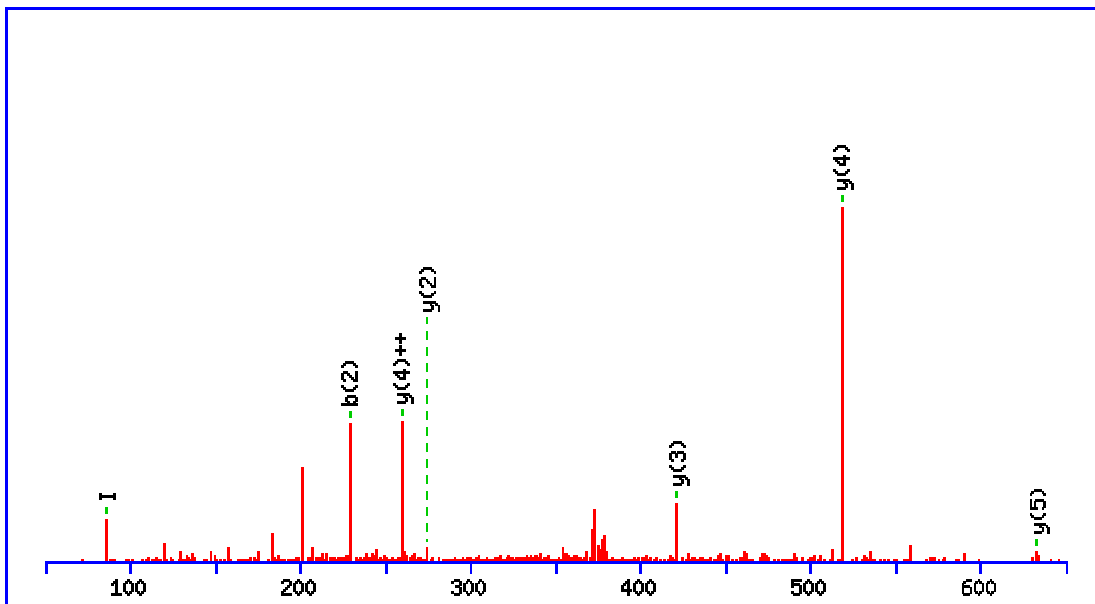

Monoisotopic mass of neutral peptide  $M_r(\text{calc})$ : 745.4123

Fixed modifications: Carbamidomethyl (C)

Ions Score: 41 Expect: 0.0079

Matches (**Bold Red**): 7/46 fragment ions using 15 most intense peaks

| # | Immon.         | b               | b <sup>++</sup> | b <sup>0</sup> | b <sup>0++</sup> | Seq.     | y               | y <sup>++</sup> | y <sup>*</sup> | y <sup>*++</sup> | y <sup>0</sup> | y <sup>0++</sup> | # |
|---|----------------|-----------------|-----------------|----------------|------------------|----------|-----------------|-----------------|----------------|------------------|----------------|------------------|---|
| 1 | <b>86.0964</b> | 114.0913        | 57.5493         |                |                  | <b>I</b> |                 |                 |                |                  |                |                  | 6 |
| 2 | 88.0393        | <b>229.1183</b> | 115.0628        | 211.1077       | 106.0575         | <b>D</b> | <b>633.3355</b> | 317.1714        | 616.3089       | 308.6581         | 615.3249       | 308.1661         | 5 |
| 3 | 70.0651        | 326.1710        | 163.5892        | 308.1605       | 154.5839         | <b>P</b> | <b>518.3085</b> | <b>259.6579</b> | 501.2820       | 251.1446         |                |                  | 4 |
| 4 | 120.0808       | 473.2395        | 237.1234        | 455.2289       | 228.1181         | <b>F</b> | <b>421.2558</b> | 211.1315        | 404.2292       | 202.6183         |                |                  | 3 |
| 5 | 72.0808        | 572.3079        | 286.6576        | 554.2973       | 277.6523         | <b>V</b> | <b>274.1874</b> | 137.5973        | 257.1608       | 129.0840         |                |                  | 2 |
| 6 | 129.1135       |                 |                 |                |                  | <b>R</b> | 175.1190        | 88.0631         | 158.0924       | 79.5498          |                |                  | 1 |

MS/MS Fragmentation of **TADDPSSLIK**

Found in **P39656**, P39656|OST48\_HUMAN Dolichyl-diphosphooligosaccharide--protein glycosyltransferase 48 kDa subunit OS=Homo sapiens GN=DDOST PE=1 SV=2

Match to Query 308: 1158.708224 from(580.361388,2+)

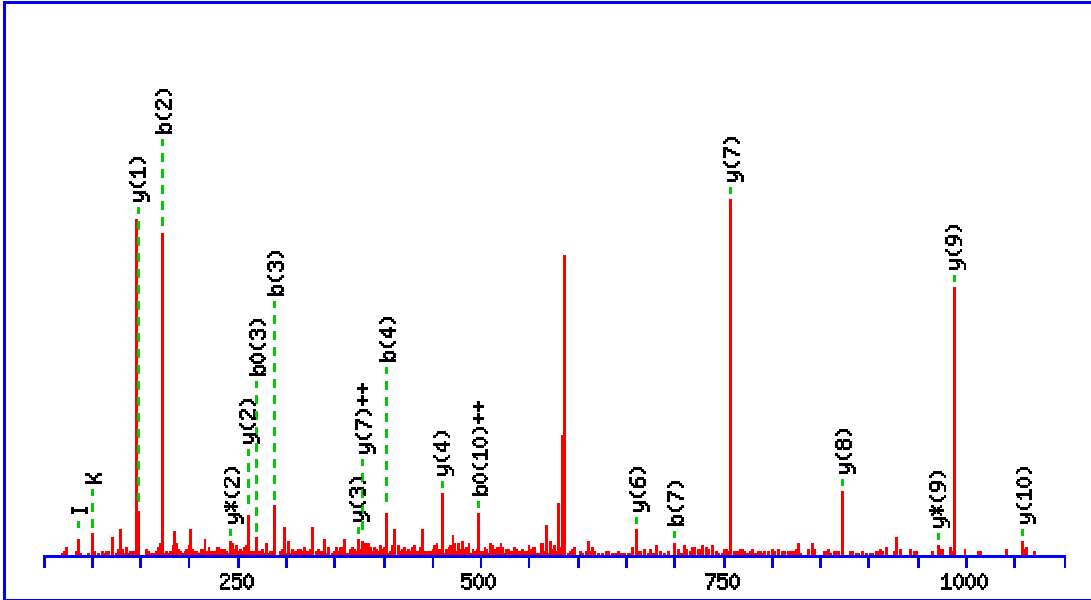

Monoisotopic mass of neutral peptide Mr(calc): 1158.6132

Fixed modifications: Carbamidomethyl (C)

Ions Score: 43 Expect: 0.004

Matches (Bold Red): 22/105 fragment ions using 60 most intense peaks

| #  | Immon.          | b               | b <sup>++</sup> | b <sup>0</sup>  | b <sup>0++</sup> | Seq. | y                | y <sup>++</sup> | y*              | y <sup>+++</sup> | y <sup>0</sup> | y <sup>0++</sup> | #  |
|----|-----------------|-----------------|-----------------|-----------------|------------------|------|------------------|-----------------|-----------------|------------------|----------------|------------------|----|
| 1  | 74.0600         | 102.0550        | 51.5311         | 84.0444         | 42.5258          | T    |                  |                 |                 |                  |                |                  | 11 |
| 2  | 44.0495         | <b>173.0921</b> | 87.0497         | 155.0815        | 78.0444          | A    | <b>1058.5728</b> | 529.7900        | 1041.5463       | 521.2768         | 1040.5623      | 520.7848         | 10 |
| 3  | 88.0393         | <b>288.1190</b> | 144.5631        | <b>270.1084</b> | 135.5579         | D    | <b>987.5357</b>  | 494.2715        | <b>970.5092</b> | 485.7582         | 969.5251       | 485.2662         | 9  |
| 4  | 88.0393         | <b>403.1460</b> | 202.0766        | 385.1354        | 193.0713         | D    | <b>872.5088</b>  | 436.7580        | 855.4822        | 428.2447         | 854.4982       | 427.7527         | 8  |
| 5  | 70.0651         | 500.1987        | 250.6030        | 482.1882        | 241.5977         | P    | <b>757.4818</b>  | <b>379.2445</b> | 740.4553        | 370.7313         | 739.4713       | 370.2393         | 7  |
| 6  | 60.0444         | 587.2307        | 294.1190        | 569.2202        | 285.1137         | S    | <b>660.4291</b>  | 330.7182        | 643.4025        | 322.2049         | 642.4185       | 321.7129         | 6  |
| 7  | <b>86.0964</b>  | <b>700.3148</b> | 350.6610        | 682.3042        | 341.6558         | L    | 573.3970         | 287.2022        | 556.3705        | 278.6889         | 555.3865       | 278.1969         | 5  |
| 8  | 60.0444         | 787.3468        | 394.1771        | 769.3363        | 385.1718         | S    | <b>460.3130</b>  | 230.6601        | 443.2864        | 222.1468         | 442.3024       | 221.6548         | 4  |
| 9  | <b>86.0964</b>  | 900.4309        | 450.7191        | 882.4203        | 441.7138         | L    | <b>373.2809</b>  | 187.1441        | 356.2544        | 178.6308         |                |                  | 3  |
| 10 | <b>86.0964</b>  | 1013.5150       | 507.2611        | 995.5044        | <b>498.2558</b>  | I    | <b>260.1969</b>  | 130.6021        | <b>243.1703</b> | 122.0888         |                |                  | 2  |
| 11 | <b>101.1073</b> |                 |                 |                 |                  | K    | <b>147.1128</b>  | 74.0600         | 130.0863        | 65.5468          |                |                  | 1  |

MS/MS Fragmentation of **ILQEGVDPK**

Found in **P40939**, P40939|ECHA\_HUMAN Trifunctional enzyme subunit alpha, mitochondrial OS=Homo sapiens GN=HADHA PE=1 SV=2

Match to Query 53: 997.572054 from(499.793303,2+)

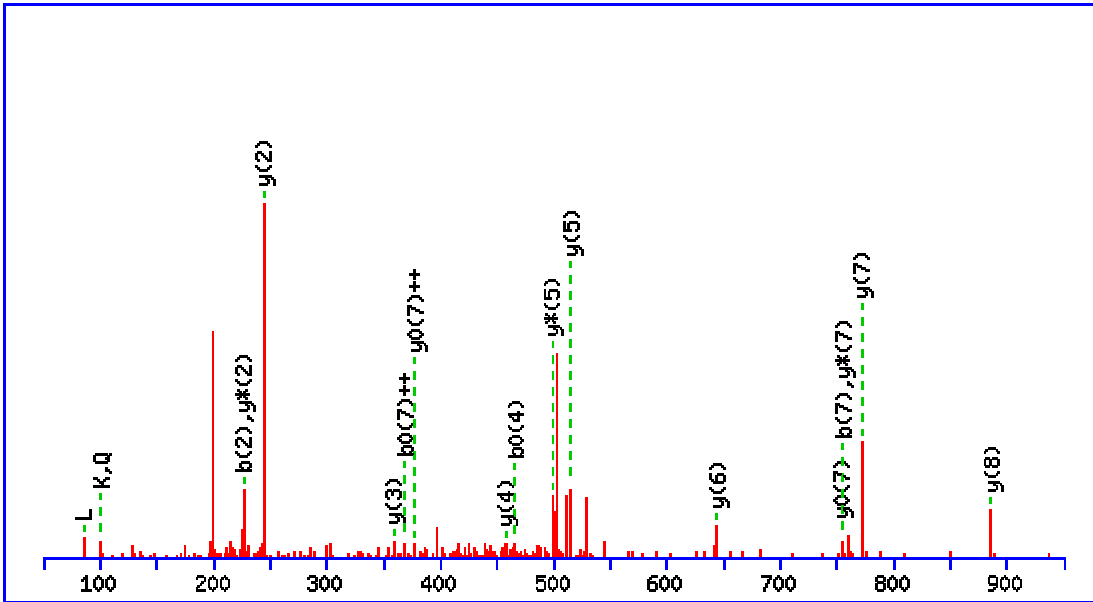

Monoisotopic mass of neutral peptide Mr(calc): 997.5444

Fixed modifications: Carbamidomethyl (C)

Ions Score: 50 Expect: 0.00067

Matches (Bold Red): 20/91 fragment ions using 30 most intense peaks

| # | Immon.          | b               | b <sup>++</sup> | b*       | b <sup>*++</sup> | b <sup>0</sup>  | b <sup>0++</sup> | Seq. | y               | y <sup>++</sup> | y*              | y <sup>*++</sup> | y <sup>0</sup>  | y <sup>0++</sup> | # |
|---|-----------------|-----------------|-----------------|----------|------------------|-----------------|------------------|------|-----------------|-----------------|-----------------|------------------|-----------------|------------------|---|
| 1 | <b>86.0964</b>  | 114.0913        | 57.5493         |          |                  |                 |                  | I    |                 |                 |                 |                  |                 |                  | 9 |
| 2 | <b>86.0964</b>  | <b>227.1754</b> | 114.0913        |          |                  |                 |                  | L    | <b>885.4676</b> | 443.2375        | 868.4411        | 434.7242         | 867.4571        | 434.2322         | 8 |
| 3 | <b>101.0709</b> | 355.2340        | 178.1206        | 338.2074 | 169.6074         |                 |                  | Q    | <b>772.3836</b> | 386.6954        | <b>755.3570</b> | 378.1821         | <b>754.3730</b> | <b>377.6901</b>  | 7 |
| 4 | 102.0550        | 484.2766        | 242.6419        | 467.2500 | 234.1287         | <b>466.2660</b> | 233.6366         | E    | <b>644.3250</b> | 322.6661        | 627.2984        | 314.1529         | 626.3144        | 313.6608         | 6 |
| 5 | 30.0338         | 541.2980        | 271.1527        | 524.2715 | 262.6394         | 523.2875        | 262.1474         | G    | <b>515.2824</b> | 258.1448        | <b>498.2558</b> | 249.6316         | 497.2718        | 249.1396         | 5 |
| 6 | 72.0808         | 640.3665        | 320.6869        | 623.3399 | 312.1736         | 622.3559        | 311.6816         | V    | <b>458.2609</b> | 229.6341        | 441.2344        | 221.1208         | 440.2504        | 220.6288         | 4 |
| 7 | 88.0393         | <b>755.3934</b> | 378.2003        | 738.3668 | 369.6871         | 737.3828        | <b>369.1951</b>  | D    | <b>359.1925</b> | 180.0999        | 342.1660        | 171.5866         | 341.1819        | 171.0946         | 3 |
| 8 | 70.0651         | 852.4462        | 426.7267        | 835.4196 | 418.2134         | 834.4356        | 417.7214         | P    | <b>244.1656</b> | 122.5864        | <b>227.1390</b> | 114.0731         |                 |                  | 2 |
| 9 | <b>101.1073</b> |                 |                 |          |                  |                 |                  | K    | 147.1128        | 74.0600         | 130.0863        | 65.5468          |                 |                  | 1 |



MS/MS Fragmentation of **ELSNTAAYQSVR**

Found in **Q9HAT2**, Q9HAT2|SIAE\_HUMAN Sialate O-acetyltransferase OS=Homo sapiens GN=SIAE PE=2 SV=1

Match to Query 440: 1337.716322 from(669.865437,2+)

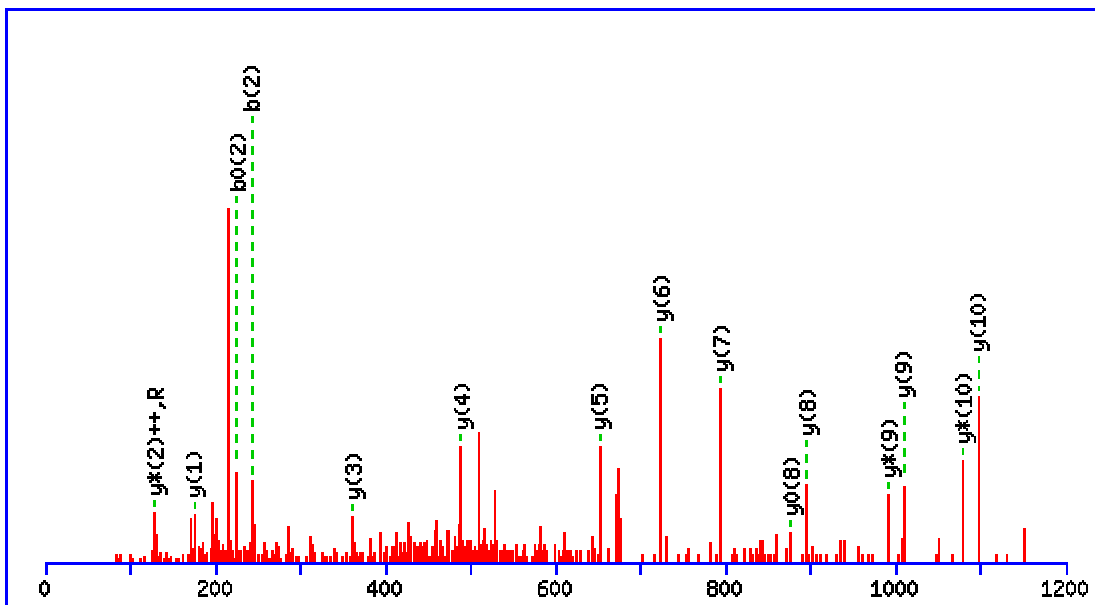

**Monoisotopic mass of neutral peptide Mr(calc):** 1337.6575

**Fixed modifications:** Carbamidomethyl (C)

**Ions Score:** 63 **Expect:** 3.8e-005

**Matches (Bold Red):** 16/134 fragment ions using 28 most intense peaks

| #  | Immon.          | b               | b <sup>++</sup> | b <sup>*</sup> | b <sup>*++</sup> | b <sup>0</sup>  | b <sup>0++</sup> | Seq. | y                | y <sup>++</sup> | y <sup>*</sup>   | y <sup>*++</sup> | y <sup>0</sup>  | y <sup>0++</sup> | #  |
|----|-----------------|-----------------|-----------------|----------------|------------------|-----------------|------------------|------|------------------|-----------------|------------------|------------------|-----------------|------------------|----|
| 1  | 102.0550        | 130.0499        | 65.5286         |                |                  | 112.0393        | 56.5233          | E    |                  |                 |                  |                  |                 |                  | 12 |
| 2  | 86.0964         | <b>243.1339</b> | 122.0706        |                |                  | <b>225.1234</b> | 113.0653         | L    | 1209.6222        | 605.3148        | 1192.5957        | 596.8015         | 1191.6117       | 596.3095         | 11 |
| 3  | 60.0444         | 330.1660        | 165.5866        |                |                  | 312.1554        | 156.5813         | S    | <b>1096.5382</b> | 548.7727        | <b>1079.5116</b> | 540.2594         | 1078.5276       | 539.7674         | 10 |
| 4  | 87.0553         | 444.2089        | 222.6081        | 427.1823       | 214.0948         | 426.1983        | 213.6028         | N    | <b>1009.5061</b> | 505.2567        | <b>992.4796</b>  | 496.7434         | 991.4956        | 496.2514         | 9  |
| 5  | 74.0600         | 545.2566        | 273.1319        | 528.2300       | 264.6186         | 527.2460        | 264.1266         | T    | <b>895.4632</b>  | 448.2352        | 878.4367         | 439.7220         | <b>877.4526</b> | 439.2300         | 8  |
| 6  | 44.0495         | 616.2937        | 308.6505        | 599.2671       | 300.1372         | 598.2831        | 299.6452         | A    | <b>794.4155</b>  | 397.7114        | 777.3890         | 389.1981         | 776.4050        | 388.7061         | 7  |
| 7  | 44.0495         | 687.3308        | 344.1690        | 670.3042       | 335.6558         | 669.3202        | 335.1638         | A    | <b>723.3784</b>  | 362.1928        | 706.3519         | 353.6796         | 705.3678        | 353.1876         | 6  |
| 8  | 136.0757        | 850.3941        | 425.7007        | 833.3676       | 417.1874         | 832.3836        | 416.6954         | Y    | <b>652.3413</b>  | 326.6743        | 635.3148         | 318.1610         | 634.3307        | 317.6690         | 5  |
| 9  | 101.0709        | 978.4527        | 489.7300        | 961.4262       | 481.2167         | 960.4421        | 480.7247         | Q    | <b>489.2780</b>  | 245.1426        | 472.2514         | 236.6293         | 471.2674        | 236.1373         | 4  |
| 10 | 60.0444         | 1065.4847       | 533.2460        | 1048.4582      | 524.7327         | 1047.4742       | 524.2407         | S    | <b>361.2194</b>  | 181.1133        | 344.1928         | 172.6001         | 343.2088        | 172.1081         | 3  |
| 11 | 72.0808         | 1164.5531       | 582.7802        | 1147.5266      | 574.2669         | 1146.5426       | 573.7749         | V    | 274.1874         | 137.5973        | 257.1608         | <b>129.0840</b>  |                 |                  | 2  |
| 12 | <b>129.1135</b> |                 |                 |                |                  |                 |                  | R    | <b>175.1190</b>  | 88.0631         | 158.0924         | 79.5498          |                 |                  | 1  |

MS/MS Fragmentation of **DTSASAVAVGLK**

Found in **P40939**, P40939|ECHA\_HUMAN Trifunctional enzyme subunit alpha, mitochondrial OS=Homo sapiens GN=HADHA PE=1 SV=2

Match to Query 292: 1117.664762 from(559.839657,2+)

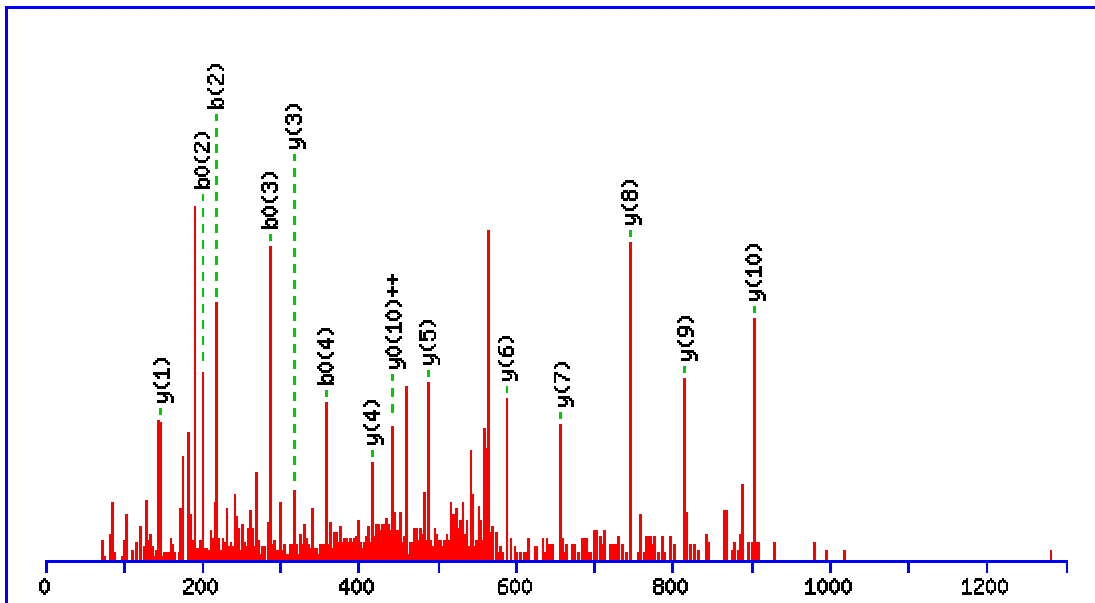

Monoisotopic mass of neutral peptide Mr(calc): 1117.5979

Fixed modifications: Carbamidomethyl (C)

Ions Score: 47 Expect: 0.0015

Matches (Bold Red): 14/108 fragment ions using 35 most intense peaks

| #  | Immon.   | b               | b <sup>++</sup> | b <sup>0</sup>  | b <sup>0++</sup> | Seq.     | y               | y <sup>++</sup> | y <sup>*</sup> | y <sup>*++</sup> | y <sup>0</sup> | y <sup>0++</sup> | #  |
|----|----------|-----------------|-----------------|-----------------|------------------|----------|-----------------|-----------------|----------------|------------------|----------------|------------------|----|
| 1  | 88.0393  | 116.0342        | 58.5207         | 98.0237         | 49.5155          | <b>D</b> |                 |                 |                |                  |                |                  | 12 |
| 2  | 74.0600  | <b>217.0819</b> | 109.0446        | <b>199.0713</b> | 100.0393         | <b>T</b> | 1003.5782       | 502.2928        | 986.5517       | 493.7795         | 985.5677       | 493.2875         | 11 |
| 3  | 60.0444  | 304.1139        | 152.5606        | <b>286.1034</b> | 143.5553         | <b>S</b> | <b>902.5306</b> | 451.7689        | 885.5040       | 443.2556         | 884.5200       | <b>442.7636</b>  | 10 |
| 4  | 44.0495  | 375.1510        | 188.0792        | <b>357.1405</b> | 179.0739         | <b>A</b> | <b>815.4985</b> | 408.2529        | 798.4720       | 399.7396         | 797.4880       | 399.2476         | 9  |
| 5  | 60.0444  | 462.1831        | 231.5952        | 444.1725        | 222.5899         | <b>S</b> | <b>744.4614</b> | 372.7343        | 727.4349       | 364.2211         | 726.4509       | 363.7291         | 8  |
| 6  | 44.0495  | 533.2202        | 267.1137        | 515.2096        | 258.1084         | <b>A</b> | <b>657.4294</b> | 329.2183        | 640.4028       | 320.7051         |                |                  | 7  |
| 7  | 72.0808  | 632.2886        | 316.6479        | 614.2780        | 307.6427         | <b>V</b> | <b>586.3923</b> | 293.6998        | 569.3657       | 285.1865         |                |                  | 6  |
| 8  | 44.0495  | 703.3257        | 352.1665        | 685.3151        | 343.1612         | <b>A</b> | <b>487.3239</b> | 244.1656        | 470.2973       | 235.6523         |                |                  | 5  |
| 9  | 72.0808  | 802.3941        | 401.7007        | 784.3836        | 392.6954         | <b>V</b> | <b>416.2867</b> | 208.6470        | 399.2602       | 200.1337         |                |                  | 4  |
| 10 | 30.0338  | 859.4156        | 430.2114        | 841.4050        | 421.2061         | <b>G</b> | <b>317.2183</b> | 159.1128        | 300.1918       | 150.5995         |                |                  | 3  |
| 11 | 86.0964  | 972.4997        | 486.7535        | 954.4891        | 477.7482         | <b>L</b> | 260.1969        | 130.6021        | 243.1703       | 122.0888         |                |                  | 2  |
| 12 | 101.1073 |                 |                 |                 |                  | <b>K</b> | <b>147.1128</b> | 74.0600         | 130.0863       | 65.5468          |                |                  | 1  |

MS/MS Fragmentation of **ISSLLEEQFQQK**

Found in **P62241**, P62241|RS8\_HUMAN 40S ribosomal protein S8 OS=Homo sapiens GN=RPS8 PE=1 SV=2

Match to Query 602: 1505.792518 from(753.903535,2+)

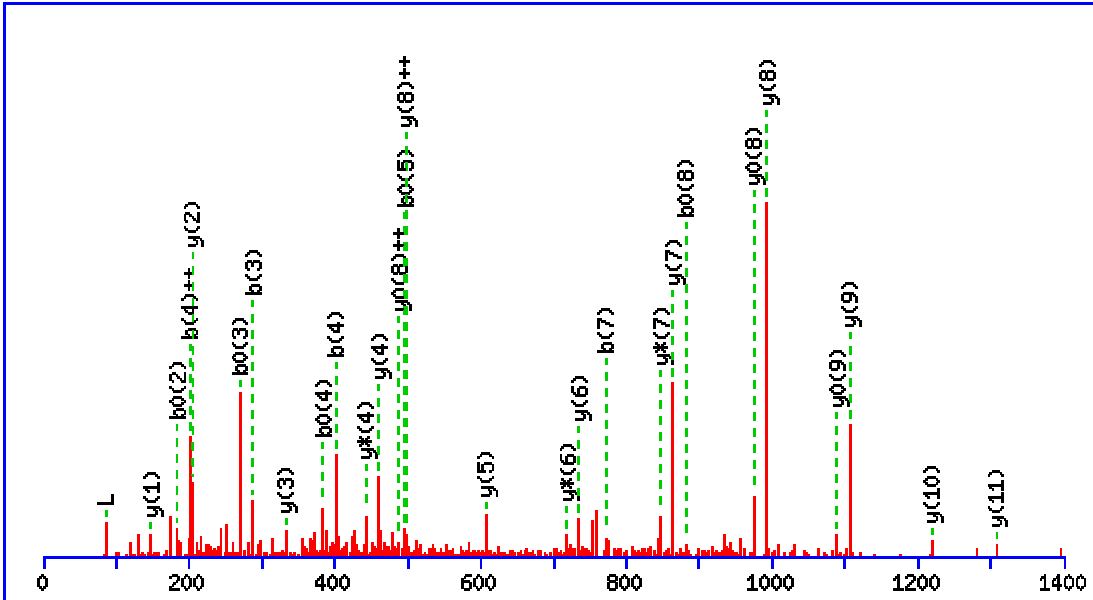

Monoisotopic mass of neutral peptide **Mr(calc):** 1505.7726

**Fixed modifications:** Carbamidomethyl (C)

**Ions Score:** 74 **Expect:** 3e-006

**Matches (Bold Red):** 31/129 fragment ions using 56 most intense peaks

| #  | Immon.         | b               | b <sup>++</sup> | b <sup>*</sup> | b <sup>*++</sup> | b <sup>0</sup>  | b <sup>0++</sup> | Seq. | y                | y <sup>++</sup> | y <sup>*</sup>  | y <sup>*++</sup> | y <sup>0</sup>   | y <sup>0++</sup> | #  |
|----|----------------|-----------------|-----------------|----------------|------------------|-----------------|------------------|------|------------------|-----------------|-----------------|------------------|------------------|------------------|----|
| 1  | <b>86.0964</b> | 114.0913        | 57.5493         |                |                  |                 |                  | I    |                  |                 |                 |                  |                  |                  | 13 |
| 2  | 60.0444        | <b>201.1234</b> | 101.0653        |                |                  | <b>183.1128</b> | 92.0600          | S    | 1393.6958        | 697.3515        | 1376.6692       | 688.8383         | 1375.6852        | 688.3462         | 12 |
| 3  | 60.0444        | <b>288.1554</b> | 144.5813        |                |                  | <b>270.1448</b> | 135.5761         | S    | <b>1306.6638</b> | 653.8355        | 1289.6372       | 645.3222         | 1288.6532        | 644.8302         | 11 |
| 4  | <b>86.0964</b> | <b>401.2395</b> | <b>201.1234</b> |                |                  | <b>383.2289</b> | 192.1181         | L    | <b>1219.6317</b> | 610.3195        | 1202.6052       | 601.8062         | 1201.6212        | 601.3142         | 10 |
| 5  | <b>86.0964</b> | 514.3235        | 257.6654        |                |                  | <b>496.3130</b> | 248.6601         | L    | <b>1106.5477</b> | 553.7775        | 1089.5211       | 545.2642         | <b>1088.5371</b> | 544.7722         | 9  |
| 6  | 102.0550       | 643.3661        | 322.1867        |                |                  | 625.3556        | 313.1814         | E    | <b>993.4636</b>  | <b>497.2354</b> | 976.4371        | 488.7222         | <b>975.4530</b>  | <b>488.2302</b>  | 8  |
| 7  | 102.0550       | <b>772.4087</b> | 386.7080        |                |                  | 754.3981        | 377.7027         | E    | <b>864.4210</b>  | 432.7141        | <b>847.3945</b> | 424.2009         | 846.4104         | 423.7089         | 7  |
| 8  | 101.0709       | 900.4673        | 450.7373        | 883.4407       | 442.2240         | <b>882.4567</b> | 441.7320         | Q    | <b>735.3784</b>  | 368.1928        | <b>718.3519</b> | 359.6796         |                  |                  | 6  |
| 9  | 120.0808       | 1047.5357       | 524.2715        | 1030.5092      | 515.7582         | 1029.5251       | 515.2662         | F    | <b>607.3198</b>  | 304.1636        | 590.2933        | 295.6503         |                  |                  | 5  |
| 10 | 101.0709       | 1175.5943       | 588.3008        | 1158.5677      | 579.7875         | 1157.5837       | 579.2955         | Q    | <b>460.2514</b>  | 230.6293        | <b>443.2249</b> | 222.1161         |                  |                  | 4  |
| 11 | 101.0709       | 1303.6529       | 652.3301        | 1286.6263      | 643.8168         | 1285.6423       | 643.3248         | Q    | <b>332.1928</b>  | 166.6001        | 315.1663        | 158.0868         |                  |                  | 3  |
| 12 | 30.0338        | 1360.6743       | 680.8408        | 1343.6478      | 672.3275         | 1342.6638       | 671.8355         | G    | <b>204.1343</b>  | 102.5708        | 187.1077        | 94.0575          |                  |                  | 2  |
| 13 | 101.1073       |                 |                 |                |                  |                 |                  | K    | <b>147.1128</b>  | 74.0600         | 130.0863        | 65.5468          |                  |                  | 1  |

MS/MS Fragmentation of **IGVLDEGK**

Found in **P46781**, P46781|RS9\_HUMAN 40S ribosomal protein S9 OS=Homo sapiens GN=RPS9 PE=1 SV=3

Match to Query 156: 829.465812 from(415.740182,2+)

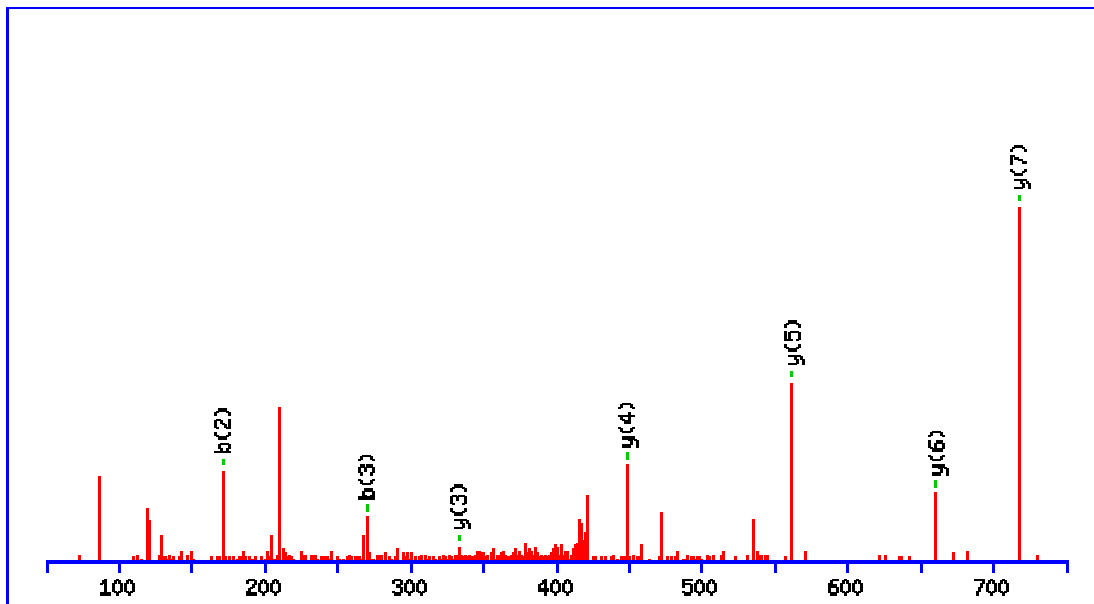

Monoisotopic mass of neutral peptide  $M_r(\text{calc})$ : 829.4545

Fixed modifications: Carbamidomethyl (C)

Ions Score: 47 Expect: 0.0019

Matches (**Bold Red**): 7/66 fragment ions using 19 most intense peaks

| # | Immon.   | b               | b <sup>++</sup> | b <sup>0</sup> | b <sup>0++</sup> | Seq. | y               | y <sup>++</sup> | y <sup>*</sup> | y <sup>*++</sup> | y <sup>0</sup> | y <sup>0++</sup> | # |
|---|----------|-----------------|-----------------|----------------|------------------|------|-----------------|-----------------|----------------|------------------|----------------|------------------|---|
| 1 | 86.0964  | 114.0913        | 57.5493         |                |                  | I    |                 |                 |                |                  |                |                  | 8 |
| 2 | 30.0338  | <b>171.1128</b> | 86.0600         |                |                  | G    | <b>717.3777</b> | 359.1925        | 700.3512       | 350.6792         | 699.3672       | 350.1872         | 7 |
| 3 | 72.0808  | <b>270.1812</b> | 135.5942        |                |                  | V    | <b>660.3563</b> | 330.6818        | 643.3297       | 322.1685         | 642.3457       | 321.6765         | 6 |
| 4 | 86.0964  | 383.2653        | 192.1363        |                |                  | L    | <b>561.2879</b> | 281.1476        | 544.2613       | 272.6343         | 543.2773       | 272.1423         | 5 |
| 5 | 88.0393  | 498.2922        | 249.6498        | 480.2817       | 240.6445         | D    | <b>448.2038</b> | 224.6055        | 431.1773       | 216.0923         | 430.1932       | 215.6003         | 4 |
| 6 | 102.0550 | 627.3348        | 314.1710        | 609.3243       | 305.1658         | E    | <b>333.1769</b> | 167.0921        | 316.1503       | 158.5788         | 315.1663       | 158.0868         | 3 |
| 7 | 30.0338  | 684.3563        | 342.6818        | 666.3457       | 333.6765         | G    | 204.1343        | 102.5708        | 187.1077       | 94.0575          |                |                  | 2 |
| 8 | 101.1073 |                 |                 |                |                  | K    | 147.1128        | 74.0600         | 130.0863       | 65.5468          |                |                  | 1 |

MS/MS Fragmentation of **VAASVLNPYVK**

Found in **P48047**, P48047|ATPO\_HUMAN ATP synthase subunit O, mitochondrial OS=Homo sapiens  
 GN=ATP5O PE=1 SV=1

Match to Query 148: 1159.580676 from(580.797614,2,+)

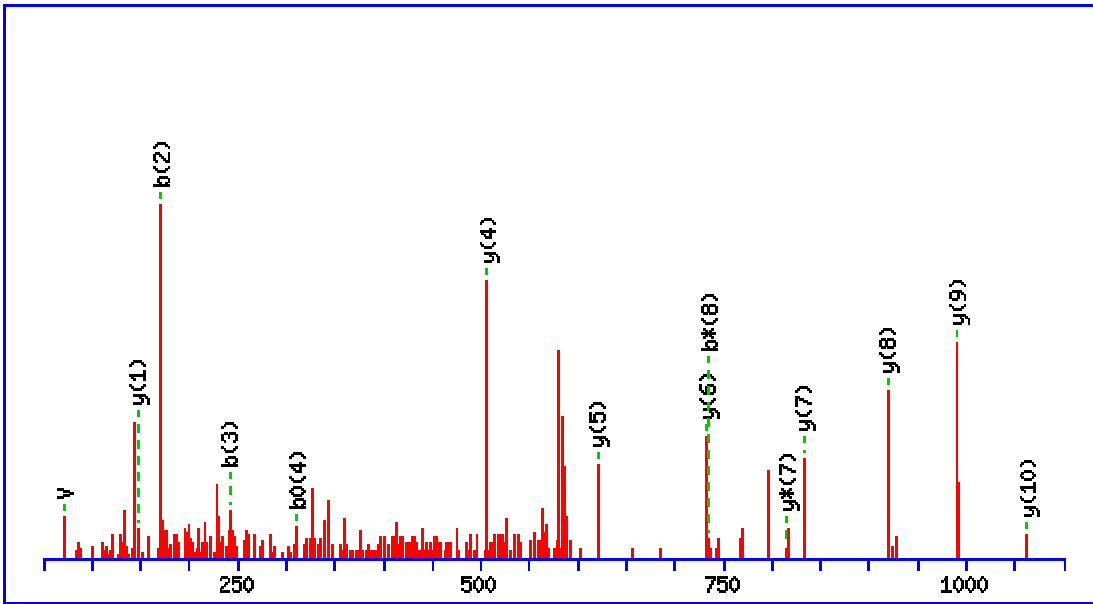

Monoisotopic mass of neutral peptide Mr(calc): 1159.6601

Fixed modifications: Carbamidomethyl (C)

Ions Score: 32 Expect: 0.046

Matches (Bold Red): 16/99 fragment ions using 49 most intense peaks

| #  | Immon.         | b               | b <sup>++</sup> | b*              | b <sup>*++</sup> | b <sup>0</sup>  | b <sup>0++</sup> | Seq. | y                | y <sup>++</sup> | y*              | y <sup>*++</sup> | y <sup>0</sup> | y <sup>0++</sup> | #  |
|----|----------------|-----------------|-----------------|-----------------|------------------|-----------------|------------------|------|------------------|-----------------|-----------------|------------------|----------------|------------------|----|
| 1  | <b>72.0808</b> | 100.0757        | 50.5415         |                 |                  |                 |                  | V    |                  |                 |                 |                  |                |                  | 11 |
| 2  | 44.0495        | <b>171.1128</b> | 86.0600         |                 |                  |                 |                  | A    | <b>1061.5990</b> | 531.3031        | 1044.5724       | 522.7898         | 1043.5884      | 522.2978         | 10 |
| 3  | 44.0495        | <b>242.1499</b> | 121.5786        |                 |                  |                 |                  | A    | <b>990.5619</b>  | 495.7846        | 973.5353        | 487.2713         | 972.5513       | 486.7793         | 9  |
| 4  | 60.0444        | 329.1819        | 165.0946        |                 |                  | <b>311.1714</b> | 156.0893         | S    | <b>919.5247</b>  | 460.2660        | 902.4982        | 451.7527         | 901.5142       | 451.2607         | 8  |
| 5  | <b>72.0808</b> | 428.2504        | 214.6288        |                 |                  | 410.2398        | 205.6235         | V    | <b>832.4927</b>  | 416.7500        | <b>815.4662</b> | 408.2367         |                |                  | 7  |
| 6  | 86.0964        | 541.3344        | 271.1709        |                 |                  | 523.3239        | 262.1656         | L    | <b>733.4243</b>  | 367.2158        | 716.3978        | 358.7025         |                |                  | 6  |
| 7  | 87.0553        | 655.3774        | 328.1923        | 638.3508        | 319.6790         | 637.3668        | 319.1870         | N    | <b>620.3402</b>  | 310.6738        | 603.3137        | 302.1605         |                |                  | 5  |
| 8  | 70.0651        | 752.4301        | 376.7187        | <b>735.4036</b> | 368.2054         | 734.4195        | 367.7134         | P    | <b>506.2973</b>  | 253.6523        | 489.2708        | 245.1390         |                |                  | 4  |
| 9  | 136.0757       | 915.4934        | 458.2504        | 898.4669        | 449.7371         | 897.4829        | 449.2451         | Y    | 409.2445         | 205.1259        | 392.2180        | 196.6126         |                |                  | 3  |
| 10 | <b>72.0808</b> | 1014.5619       | 507.7846        | 997.5353        | 499.2713         | 996.5513        | 498.7793         | V    | 246.1812         | 123.5942        | 229.1547        | 115.0810         |                |                  | 2  |
| 11 | 101.1073       |                 |                 |                 |                  |                 |                  | K    | <b>147.1128</b>  | 74.0600         | 130.0863        | 65.5468          |                |                  | 1  |

MS/MS Fragmentation of **ETPAATEAPSSTPK**

Found in **P80723**, P80723|BASP\_HUMAN Brain acid soluble protein 1 OS=Homo sapiens GN=BASP1 PE=1 SV=2

Match to Query 578: 1385.629312 from(693.821932,2+)

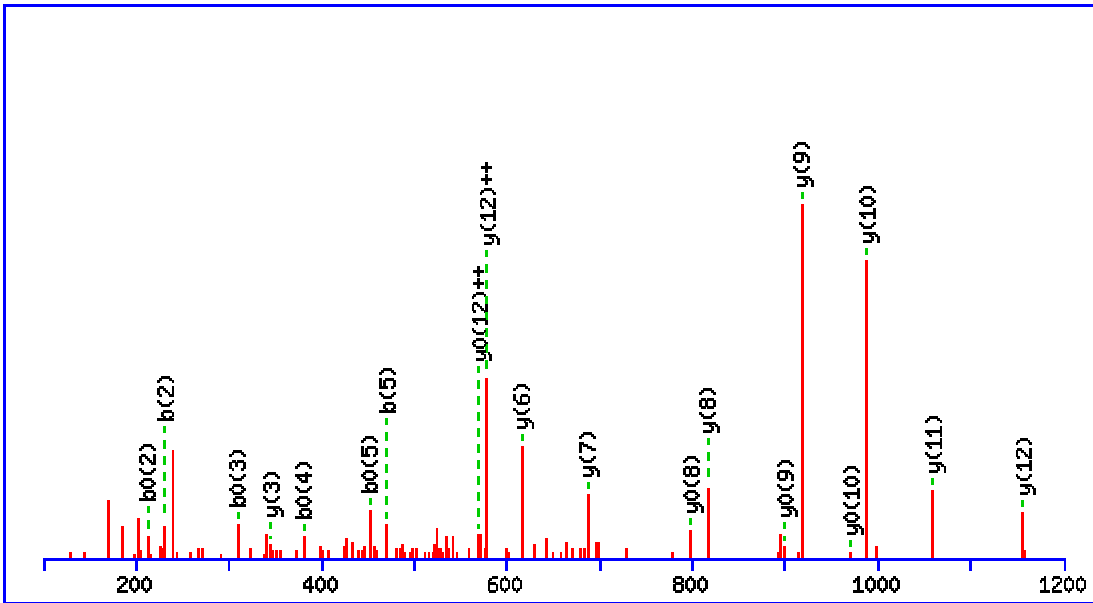

Monoisotopic mass of neutral peptide Mr(calc): 1385.6674

Fixed modifications: Carbamidomethyl (C)

Ions Score: 44 Expect: 0.003

Matches (Bold Red): 19/140 fragment ions using 40 most intense peaks

| #  | Immon.   | b               | b <sup>++</sup> | b <sup>0</sup>  | b <sup>0++</sup> | Seq. | y                | y <sup>++</sup> | y <sup>*</sup> | y <sup>*++</sup> | y <sup>0</sup>  | y <sup>0++</sup> | #  |
|----|----------|-----------------|-----------------|-----------------|------------------|------|------------------|-----------------|----------------|------------------|-----------------|------------------|----|
| 1  | 102.0550 | 130.0499        | 65.5286         | 112.0393        | 56.5233          | E    |                  |                 |                |                  |                 |                  | 14 |
| 2  | 74.0600  | <b>231.0975</b> | 116.0524        | <b>213.0870</b> | 107.0471         | T    | 1257.6321        | 629.3197        | 1240.6056      | 620.8064         | 1239.6216       | 620.3144         | 13 |
| 3  | 70.0651  | 328.1503        | 164.5788        | <b>310.1397</b> | 155.5735         | P    | <b>1156.5844</b> | <b>578.7959</b> | 1139.5579      | 570.2826         | 1138.5739       | <b>569.7906</b>  | 12 |
| 4  | 44.0495  | 399.1874        | 200.0974        | <b>381.1769</b> | 191.0921         | A    | <b>1059.5317</b> | 530.2695        | 1042.5051      | 521.7562         | 1041.5211       | 521.2642         | 11 |
| 5  | 44.0495  | <b>470.2245</b> | 235.6159        | <b>452.2140</b> | 226.6106         | A    | <b>988.4946</b>  | 494.7509        | 971.4680       | 486.2376         | <b>970.4840</b> | 485.7456         | 10 |
| 6  | 74.0600  | 571.2722        | 286.1397        | 553.2617        | 277.1345         | T    | <b>917.4575</b>  | 459.2324        | 900.4309       | 450.7191         | <b>899.4469</b> | 450.2271         | 9  |
| 7  | 102.0550 | 700.3148        | 350.6610        | 682.3042        | 341.6558         | E    | <b>816.4098</b>  | 408.7085        | 799.3832       | 400.1953         | <b>798.3992</b> | 399.7032         | 8  |
| 8  | 44.0495  | 771.3519        | 386.1796        | 753.3414        | 377.1743         | A    | <b>687.3672</b>  | 344.1872        | 670.3406       | 335.6740         | 669.3566        | 335.1819         | 7  |
| 9  | 70.0651  | 868.4047        | 434.7060        | 850.3941        | 425.7007         | P    | <b>616.3301</b>  | 308.6687        | 599.3035       | 300.1554         | 598.3195        | 299.6634         | 6  |
| 10 | 60.0444  | 955.4367        | 478.2220        | 937.4262        | 469.2167         | S    | 519.2773         | 260.1423        | 502.2508       | 251.6290         | 501.2667        | 251.1370         | 5  |
| 11 | 60.0444  | 1042.4687       | 521.7380        | 1024.4582       | 512.7327         | S    | 432.2453         | 216.6263        | 415.2187       | 208.1130         | 414.2347        | 207.6210         | 4  |
| 12 | 74.0600  | 1143.5164       | 572.2619        | 1125.5059       | 563.2566         | T    | <b>345.2132</b>  | 173.1103        | 328.1867       | 164.5970         | 327.2027        | 164.1050         | 3  |
| 13 | 70.0651  | 1240.5692       | 620.7882        | 1222.5586       | 611.7830         | P    | 244.1656         | 122.5864        | 227.1390       | 114.0731         |                 |                  | 2  |
| 14 | 101.1073 |                 |                 |                 |                  | K    | 147.1128         | 74.0600         | 130.0863       | 65.5468          |                 |                  | 1  |

MS/MS Fragmentation of **LCTSATESEVAR**

Found in **P31930**, P31930|QCR1\_HUMAN Cytochrome b-c1 complex subunit 1, mitochondrial OS=Homo sapiens GN=UQCRC1 PE=1 SV=3

Match to Query 370: 1322.685410 from(662.349981,2,+)

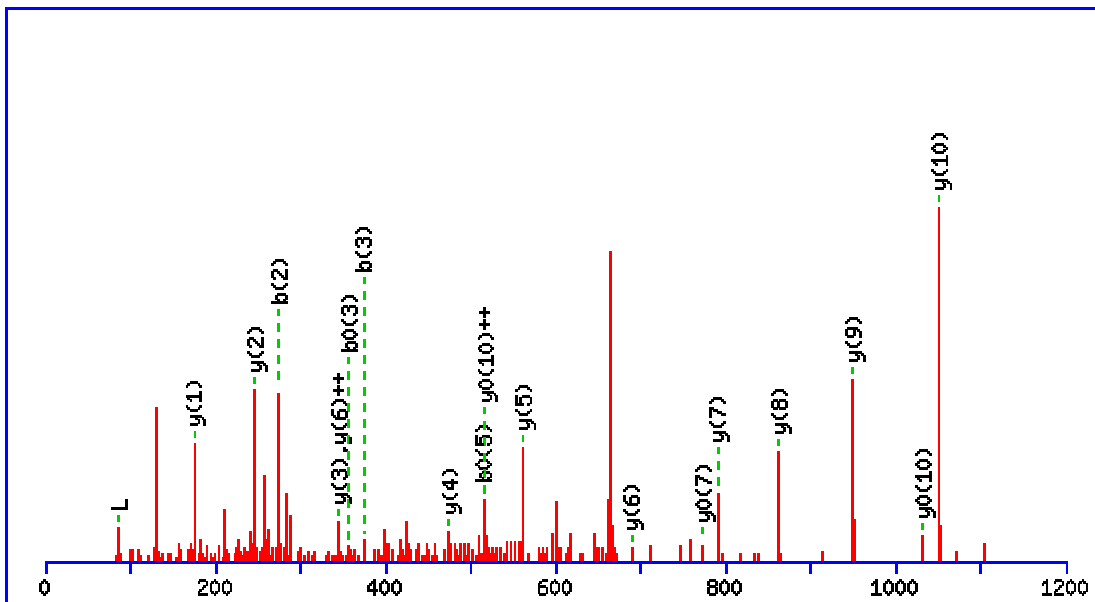

Monoisotopic mass of neutral peptide Mr(calc): 1322.6136

Fixed modifications: Carbamidomethyl (C)

Ions Score: 55 Expect: 0.00022

Matches (Bold Red): 19/112 fragment ions using 50 most intense peaks

| #  | Immon.         | b               | b <sup>++</sup> | b <sup>0</sup>  | b <sup>0++</sup> | Seq. | y                | y <sup>++</sup> | y <sup>*</sup> | y <sup>*++</sup> | y <sup>0</sup>   | y <sup>0++</sup> | #  |
|----|----------------|-----------------|-----------------|-----------------|------------------|------|------------------|-----------------|----------------|------------------|------------------|------------------|----|
| 1  | <b>86.0964</b> | 114.0913        | 57.5493         |                 |                  | L    |                  |                 |                |                  |                  |                  | 12 |
| 2  | 133.0430       | <b>274.1220</b> | 137.5646        |                 |                  | C    | 1210.5368        | 605.7721        | 1193.5103      | 597.2588         | 1192.5263        | 596.7668         | 11 |
| 3  | 74.0600        | <b>375.1697</b> | 188.0885        | <b>357.1591</b> | 179.0832         | T    | <b>1050.5062</b> | 525.7567        | 1033.4796      | 517.2435         | <b>1032.4956</b> | <b>516.7515</b>  | 10 |
| 4  | 60.0444        | 462.2017        | 231.6045        | 444.1911        | 222.5992         | S    | <b>949.4585</b>  | 475.2329        | 932.4320       | 466.7196         | 931.4479         | 466.2276         | 9  |
| 5  | 44.0495        | 533.2388        | 267.1230        | <b>515.2282</b> | 258.1178         | A    | <b>862.4265</b>  | 431.7169        | 845.3999       | 423.2036         | 844.4159         | 422.7116         | 8  |
| 6  | 74.0600        | 634.2865        | 317.6469        | 616.2759        | 308.6416         | T    | <b>791.3894</b>  | 396.1983        | 774.3628       | 387.6850         | <b>773.3788</b>  | 387.1930         | 7  |
| 7  | 102.0550       | 763.3291        | 382.1682        | 745.3185        | 373.1629         | E    | <b>690.3417</b>  | <b>345.6745</b> | 673.3151       | 337.1612         | 672.3311         | 336.6692         | 6  |
| 8  | 60.0444        | 850.3611        | 425.6842        | 832.3505        | 416.6789         | S    | <b>561.2991</b>  | 281.1532        | 544.2726       | 272.6399         | 543.2885         | 272.1479         | 5  |
| 9  | 102.0550       | 979.4037        | 490.2055        | 961.3931        | 481.2002         | E    | <b>474.2671</b>  | 237.6372        | 457.2405       | 229.1239         | 456.2565         | 228.6319         | 4  |
| 10 | 72.0808        | 1078.4721       | 539.7397        | 1060.4616       | 530.7344         | V    | <b>345.2245</b>  | 173.1159        | 328.1979       | 164.6026         |                  |                  | 3  |
| 11 | 44.0495        | 1149.5092       | 575.2583        | 1131.4987       | 566.2530         | A    | <b>246.1561</b>  | 123.5817        | 229.1295       | 115.0684         |                  |                  | 2  |
| 12 | 129.1135       |                 |                 |                 |                  | R    | <b>175.1190</b>  | 88.0631         | 158.0924       | 79.5498          |                  |                  | 1  |

MS/MS Fragmentation of **ADGGTQVIDTK**

Found in **P09622**, P09622|DLDH\_HUMAN Dihydrolipoyl dehydrogenase, mitochondrial OS=Homo sapiens  
GN=DLD PE=1 SV=1

Match to Query 284: 1103.628828 from(552.821690,2+)

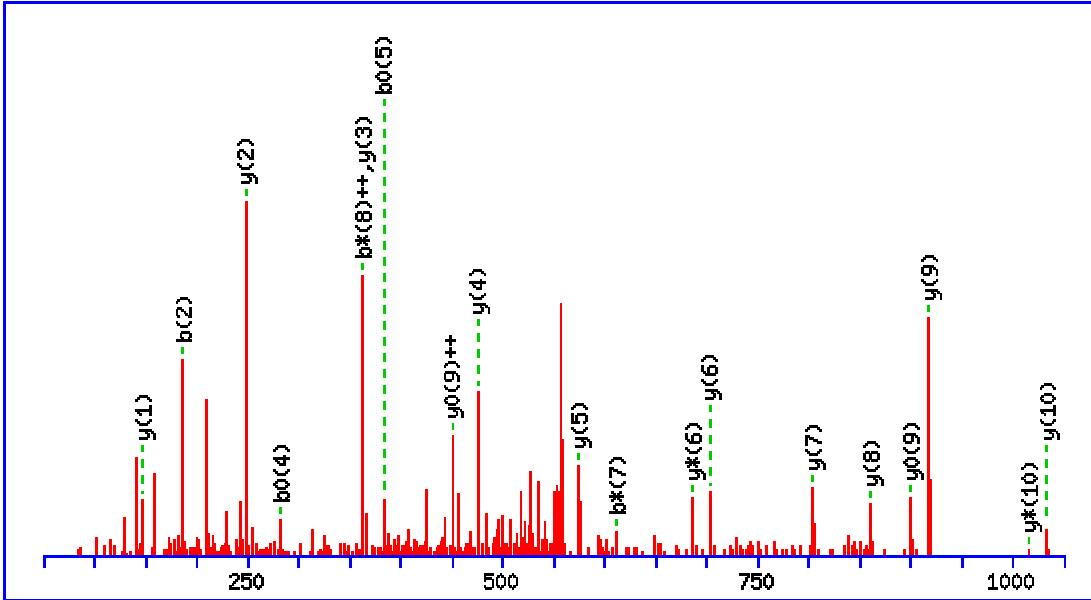

Monoisotopic mass of neutral peptide Mr(calc): 1103.5459

Fixed modifications: Carbamidomethyl (C)

Ions Score: 75 Expect: 2.5e-006

Matches (Bold Red): 19/117 fragment ions using 34 most intense peaks

| #  | Immon.   | b               | b <sup>++</sup> | b*              | b <sup>+++</sup> | b <sup>0</sup>  | b <sup>0++</sup> | Seq. | y                | y <sup>++</sup> | y*               | y <sup>+++</sup> | y <sup>0</sup>  | y <sup>0++</sup> | #  |
|----|----------|-----------------|-----------------|-----------------|------------------|-----------------|------------------|------|------------------|-----------------|------------------|------------------|-----------------|------------------|----|
| 1  | 44.0495  | 72.0444         | 36.5258         |                 |                  |                 |                  | A    |                  |                 |                  |                  |                 |                  | 11 |
| 2  | 88.0393  | <b>187.0713</b> | 94.0393         |                 |                  | 169.0608        | 85.0340          | D    | <b>1033.5160</b> | 517.2617        | <b>1016.4895</b> | 508.7484         | 1015.5055       | 508.2564         | 10 |
| 3  | 30.0338  | 244.0928        | 122.5500        |                 |                  | 226.0822        | 113.5448         | G    | <b>918.4891</b>  | 459.7482        | 901.4625         | 451.2349         | <b>900.4785</b> | <b>450.7429</b>  | 9  |
| 4  | 30.0338  | 301.1143        | 151.0608        |                 |                  | <b>283.1037</b> | 142.0555         | G    | <b>861.4676</b>  | 431.2375        | 844.4411         | 422.7242         | 843.4571        | 422.2322         | 8  |
| 5  | 74.0600  | 402.1619        | 201.5846        |                 |                  | <b>384.1514</b> | 192.5793         | T    | <b>804.4462</b>  | 402.7267        | 787.4196         | 394.2134         | 786.4356        | 393.7214         | 7  |
| 6  | 101.0709 | 530.2205        | 265.6139        | 513.1940        | 257.1006         | 512.2100        | 256.6086         | Q    | <b>703.3985</b>  | 352.2029        | <b>686.3719</b>  | 343.6896         | 685.3879        | 343.1976         | 6  |
| 7  | 72.0808  | 629.2889        | 315.1481        | <b>612.2624</b> | 306.6348         | 611.2784        | 306.1428         | V    | <b>575.3399</b>  | 288.1736        | 558.3134         | 279.6603         | 557.3293        | 279.1683         | 5  |
| 8  | 86.0964  | 742.3730        | 371.6901        | 725.3464        | <b>363.1769</b>  | 724.3624        | 362.6849         | I    | <b>476.2715</b>  | 238.6394        | 459.2449         | 230.1261         | 458.2609        | 229.6341         | 4  |
| 9  | 88.0393  | 857.3999        | 429.2036        | 840.3734        | 420.6903         | 839.3894        | 420.1983         | D    | <b>363.1874</b>  | 182.0974        | 346.1609         | 173.5841         | 345.1769        | 173.0921         | 3  |
| 10 | 74.0600  | 958.4476        | 479.7274        | 941.4211        | 471.2142         | 940.4371        | 470.7222         | T    | <b>248.1605</b>  | 124.5839        | 231.1339         | 116.0706         | 230.1499        | 115.5786         | 2  |
| 11 | 101.1073 |                 |                 |                 |                  |                 |                  | K    | <b>147.1128</b>  | 74.0600         | 130.0863         | 65.5468          |                 |                  | 1  |



MS/MS Fragmentation of **AQVADVVS**R

Found in **P49327**, P49327|FAS\_HUMAN Fatty acid synthase OS=Homo sapiens GN=FASN PE=1 SV=2

Match to Query 353: 1042.580844 from(522.297698,2+)

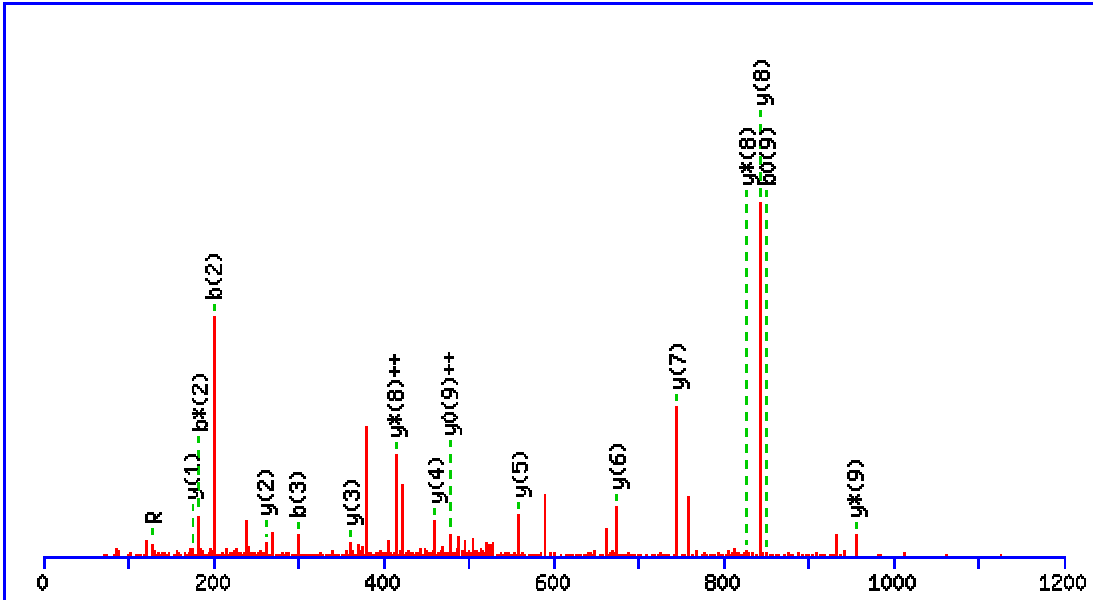

Monoisotopic mass of neutral peptide Mr(calc): 1042.5771

Fixed modifications: Carbamidomethyl (C)

Ions Score: 32 Expect: 0.047

Matches (Bold Red): 17/106 fragment ions using 50 most intense peaks

| #  | Immon.          | b               | b <sup>++</sup> | b <sup>*</sup>  | b <sup>+++</sup> | b <sup>0</sup>  | b <sup>0++</sup> | Seq. | y               | y <sup>++</sup> | y <sup>*</sup>  | y <sup>***</sup> | y <sup>0</sup> | y <sup>0++</sup> | #  |
|----|-----------------|-----------------|-----------------|-----------------|------------------|-----------------|------------------|------|-----------------|-----------------|-----------------|------------------|----------------|------------------|----|
| 1  | 44.0495         | 72.0444         | 36.5258         |                 |                  |                 |                  | A    |                 |                 |                 |                  |                |                  | 10 |
| 2  | 101.0709        | <b>200.1030</b> | 100.5551        | <b>183.0764</b> | 92.0418          |                 |                  | Q    | 972.5473        | 486.7773        | <b>955.5207</b> | 478.2640         | 954.5367       | <b>477.7720</b>  | 9  |
| 3  | 72.0808         | <b>299.1714</b> | 150.0893        | 282.1448        | 141.5761         |                 |                  | V    | <b>844.4887</b> | 422.7480        | <b>827.4621</b> | <b>414.2347</b>  | 826.4781       | 413.7427         | 8  |
| 4  | 44.0495         | 370.2085        | 185.6079        | 353.1819        | 177.0946         |                 |                  | A    | <b>745.4203</b> | 373.2138        | 728.3937        | 364.7005         | 727.4097       | 364.2085         | 7  |
| 5  | 88.0393         | 485.2354        | 243.1214        | 468.2089        | 234.6081         | 467.2249        | 234.1161         | D    | <b>674.3832</b> | 337.6952        | 657.3566        | 329.1819         | 656.3726       | 328.6899         | 6  |
| 6  | 72.0808         | 584.3039        | 292.6556        | 567.2773        | 284.1423         | 566.2933        | 283.6503         | V    | <b>559.3562</b> | 280.1817        | 542.3297        | 271.6685         | 541.3457       | 271.1765         | 5  |
| 7  | 72.0808         | 683.3723        | 342.1898        | 666.3457        | 333.6765         | 665.3617        | 333.1845         | V    | <b>460.2878</b> | 230.6475        | 443.2613        | 222.1343         | 442.2772       | 221.6423         | 4  |
| 8  | 72.0808         | 782.4407        | 391.7240        | 765.4141        | 383.2107         | 764.4301        | 382.7187         | V    | <b>361.2194</b> | 181.1133        | 344.1928        | 172.6001         | 343.2088       | 172.1081         | 3  |
| 9  | 60.0444         | 869.4727        | 435.2400        | 852.4462        | 426.7267         | <b>851.4621</b> | 426.2347         | S    | <b>262.1510</b> | 131.5791        | 245.1244        | 123.0659         | 244.1404       | 122.5738         | 2  |
| 10 | <b>129.1135</b> |                 |                 |                 |                  |                 |                  | R    | <b>175.1190</b> | 88.0631         | 158.0924        | 79.5498          |                |                  | 1  |

MS/MS Fragmentation of **VTLTSEEAR**

Found in **P00338**, P00338|LDHA\_HUMAN L-lactate dehydrogenase A chain OS=Homo sapiens GN=LDHA PE=1 SV=2

Match to Query 252: 1133.591696 from(567.803124,2,+)

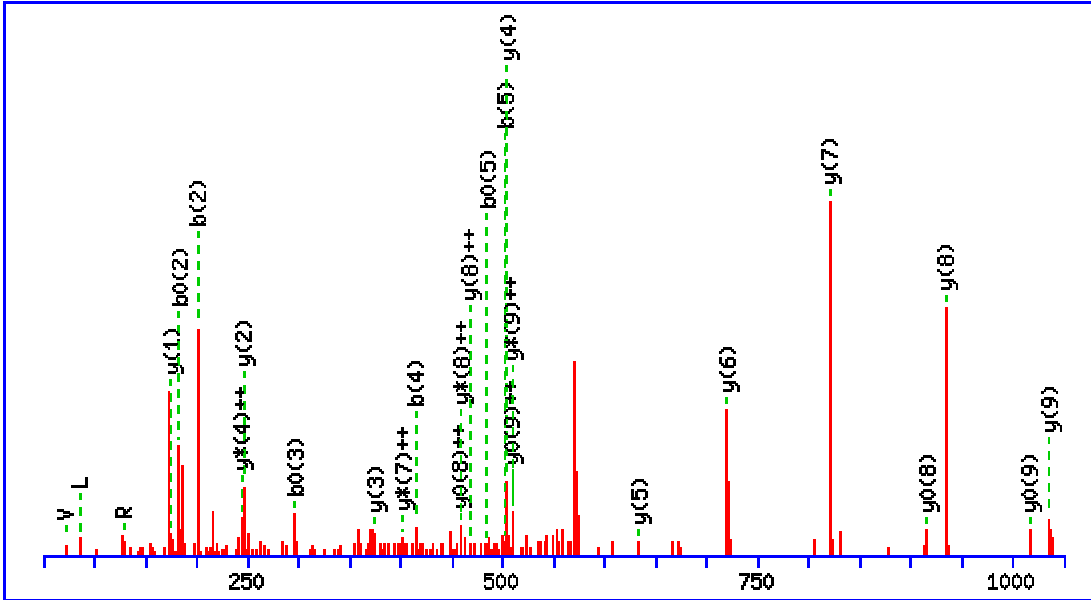

Monoisotopic mass of neutral peptide Mr(calc): 1133.5564

Fixed modifications: Carbamidomethyl (C)

Ions Score: 34 Expect: 0.029

Matches (Bold Red): 27/94 fragment ions using 91 most intense peaks

| #  | Immon.          | b               | b <sup>++</sup> | b <sup>0</sup>  | b <sup>0++</sup> | Seq. | y                | y <sup>++</sup> | y <sup>*</sup> | y <sup>*++</sup> | y <sup>0</sup>   | y <sup>0++</sup> | #  |
|----|-----------------|-----------------|-----------------|-----------------|------------------|------|------------------|-----------------|----------------|------------------|------------------|------------------|----|
| 1  | <b>72.0808</b>  | 100.0757        | 50.5415         |                 |                  | V    |                  |                 |                |                  |                  |                  | 10 |
| 2  | 74.0600         | <b>201.1234</b> | 101.0653        | <b>183.1128</b> | 92.0600          | T    | <b>1035.4953</b> | 518.2513        | 1018.4687      | <b>509.7380</b>  | <b>1017.4847</b> | <b>509.2460</b>  | 9  |
| 3  | <b>86.0964</b>  | 314.2074        | 157.6074        | <b>296.1969</b> | 148.6021         | L    | <b>934.4476</b>  | <b>467.7274</b> | 917.4211       | <b>459.2142</b>  | <b>916.4371</b>  | <b>458.7222</b>  | 8  |
| 4  | 74.0600         | <b>415.2551</b> | 208.1312        | 397.2445        | 199.1259         | T    | <b>821.3636</b>  | 411.1854        | 804.3370       | <b>402.6721</b>  | 803.3530         | 402.1801         | 7  |
| 5  | 60.0444         | <b>502.2871</b> | 251.6472        | <b>484.2766</b> | 242.6419         | S    | <b>720.3159</b>  | 360.6616        | 703.2893       | 352.1483         | 702.3053         | 351.6563         | 6  |
| 6  | 102.0550        | 631.3297        | 316.1685        | 613.3192        | 307.1632         | E    | <b>633.2838</b>  | 317.1456        | 616.2573       | 308.6323         | 615.2733         | 308.1403         | 5  |
| 7  | 102.0550        | 760.3723        | 380.6898        | 742.3618        | 371.6845         | E    | <b>504.2413</b>  | 252.6243        | 487.2147       | <b>244.1110</b>  | 486.2307         | 243.6190         | 4  |
| 8  | 102.0550        | 889.4149        | 445.2111        | 871.4044        | 436.2058         | E    | <b>375.1987</b>  | 188.1030        | 358.1721       | 179.5897         | 357.1881         | 179.0977         | 3  |
| 9  | 44.0495         | 960.4520        | 480.7297        | 942.4415        | 471.7244         | A    | <b>246.1561</b>  | 123.5817        | 229.1295       | 115.0684         |                  |                  | 2  |
| 10 | <b>129.1135</b> |                 |                 |                 |                  | R    | <b>175.1190</b>  | 88.0631         | 158.0924       | 79.5498          |                  |                  | 1  |

MS/MS Fragmentation of **ELISMIQVVK**

Found in **P08575**, P08575|CD45\_HUMAN Leukocyte common antigen OS=Homo sapiens GN=PTPRC PE=1 SV=2

Match to Query 450: 1174.650376 from(588.332464,2+)

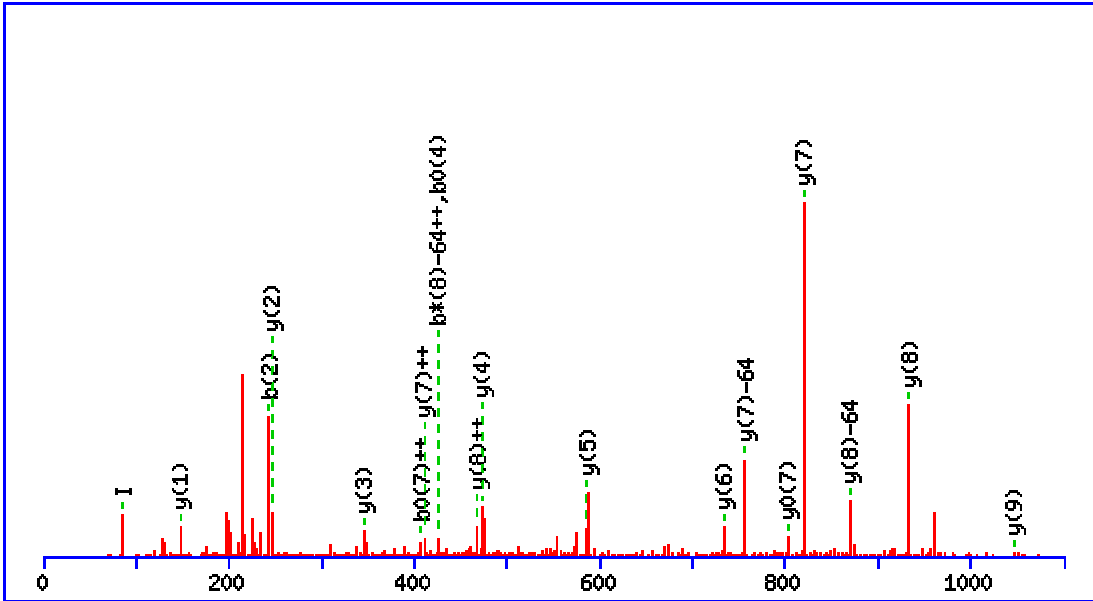

Monoisotopic mass of neutral peptide  $M_r(\text{calc})$ : 1174.6631

Fixed modifications: Carbamidomethyl (C)

Variable modifications:

M5 : Oxidation (M), with neutral losses 0.0000(shown in table), 63.9983

Ions Score: 57 Expect: 0.00015

Matches (**Bold Red**): 21/143 fragment ions using 35 most intense peaks

| #  | Immon.         | b               | b <sup>++</sup> | b <sup>*</sup> | b <sup>*++</sup> | b <sup>0</sup>  | b <sup>0++</sup> | Seq.     | y                | y <sup>++</sup> | y <sup>*</sup> | y <sup>*++</sup> | y <sup>0</sup>  | y <sup>0++</sup> | #  |
|----|----------------|-----------------|-----------------|----------------|------------------|-----------------|------------------|----------|------------------|-----------------|----------------|------------------|-----------------|------------------|----|
| 1  | 102.0550       | 130.0499        | 65.5286         |                |                  | 112.0393        | 56.5233          | <b>E</b> |                  |                 |                |                  |                 |                  | 10 |
| 2  | <b>86.0964</b> | <b>243.1339</b> | 122.0706        |                |                  | 225.1234        | 113.0653         | <b>L</b> | <b>1046.6278</b> | 523.8176        | 1029.6013      | 515.3043         | 1028.6173       | 514.8123         | 9  |
| 3  | <b>86.0964</b> | 356.2180        | 178.6126        |                |                  | 338.2074        | 169.6074         | <b>I</b> | <b>933.5438</b>  | <b>467.2755</b> | 916.5172       | 458.7622         | 915.5332        | 458.2702         | 8  |
| 4  | 60.0444        | 443.2500        | 222.1287        |                |                  | <b>425.2395</b> | 213.1234         | <b>S</b> | <b>820.4597</b>  | <b>410.7335</b> | 803.4332       | 402.2202         | <b>802.4491</b> | 401.7282         | 7  |
| 5  | 120.0478       | 590.2854        | 295.6464        |                |                  | 572.2749        | 286.6411         | <b>M</b> | <b>733.4277</b>  | 367.2175        | 716.4011       | 358.7042         |                 |                  | 6  |
| 6  | <b>86.0964</b> | 703.3695        | 352.1884        |                |                  | 685.3589        | 343.1831         | <b>I</b> | <b>586.3923</b>  | 293.6998        | 569.3657       | 285.1865         |                 |                  | 5  |
| 7  | 101.0709       | 831.4281        | 416.2177        | 814.4015       | 407.7044         | 813.4175        | <b>407.2124</b>  | <b>Q</b> | <b>473.3082</b>  | 237.1577        | 456.2817       | 228.6445         |                 |                  | 4  |
| 8  | 72.0808        | 930.4965        | 465.7519        | 913.4699       | 457.2386         | 912.4859        | 456.7466         | <b>V</b> | <b>345.2496</b>  | 173.1285        | 328.2231       | 164.6152         |                 |                  | 3  |
| 9  | 72.0808        | 1029.5649       | 515.2861        | 1012.5383      | 506.7728         | 1011.5543       | 506.2808         | <b>V</b> | <b>246.1812</b>  | 123.5942        | 229.1547       | 115.0810         |                 |                  | 2  |
| 10 | 101.1073       |                 |                 |                |                  |                 |                  | <b>K</b> | <b>147.1128</b>  | 74.0600         | 130.0863       | 65.5468          |                 |                  | 1  |

MS/MS Fragmentation of **EILSEENEMQPNGK**

Found in **O60488**, O60488|ACSL4\_HUMAN Long-chain-fatty-acid--CoA ligase 4 OS=Homo sapiens  
GN=ACSL4 PE=1 SV=2

Match to Query 426: 1632.804198 from(817.409375,2+)

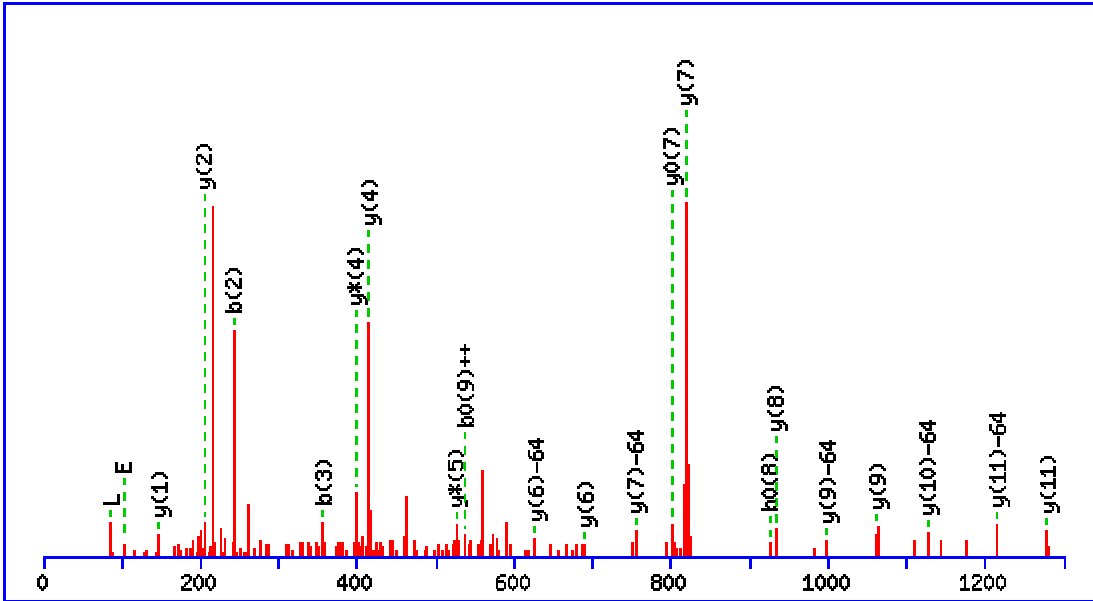

Monoisotopic mass of neutral peptide Mr(calc): 1632.7301

Fixed modifications: Carbamidomethyl (C)

Variable modifications:

M9 : Oxidation (M), with neutral losses 63.9983(shown in table), 0.0000

Ions Score: 34 Expect: 0.026

Matches (Bold Red): 26/223 fragment ions using 53 most intense peaks

| #  | Immon.          | b               | b <sup>++</sup> | b <sup>*</sup> | b <sup>*++</sup> | b <sup>0</sup>  | b <sup>0++</sup> | Seq.     | y                | y <sup>++</sup> | y <sup>*</sup>  | y <sup>*++</sup> | y <sup>0</sup> | y <sup>0++</sup> | #         |
|----|-----------------|-----------------|-----------------|----------------|------------------|-----------------|------------------|----------|------------------|-----------------|-----------------|------------------|----------------|------------------|-----------|
| 1  | <b>102.0550</b> | 130.0499        | 65.5286         |                |                  | 112.0393        | 56.5233          | <b>E</b> |                  |                 |                 |                  |                |                  | <b>14</b> |
| 2  | <b>86.0964</b>  | <b>243.1339</b> | 122.0706        |                |                  | 225.1234        | 113.0653         | <b>I</b> | 1440.6965        | 720.8519        | 1423.6700       | 712.3386         | 1422.6860      | 711.8466         | <b>13</b> |
| 3  | <b>86.0964</b>  | <b>356.2180</b> | 178.6126        |                |                  | 338.2074        | 169.6074         | <b>L</b> | 1327.6125        | 664.3099        | 1310.5859       | 655.7966         | 1309.6019      | 655.3046         | <b>12</b> |
| 4  | 60.0444         | 443.2500        | 222.1287        |                |                  | 425.2395        | 213.1234         | <b>S</b> | <b>1214.5284</b> | 607.7678        | 1197.5018       | 599.2546         | 1196.5178      | 598.7626         | <b>11</b> |
| 5  | <b>102.0550</b> | 572.2926        | 286.6499        |                |                  | 554.2821        | 277.6447         | <b>E</b> | <b>1127.4964</b> | 564.2518        | 1110.4698       | 555.7385         | 1109.4858      | 555.2465         | <b>10</b> |
| 6  | <b>102.0550</b> | 701.3352        | 351.1712        |                |                  | 683.3246        | 342.1660         | <b>E</b> | <b>998.4538</b>  | 499.7305        | 981.4272        | 491.2172         | 980.4432       | 490.7252         | <b>9</b>  |
| 7  | 87.0553         | 815.3781        | 408.1927        | 798.3516       | 399.6794         | 797.3676        | 399.1874         | <b>N</b> | 869.4112         | 435.2092        | 852.3846        | 426.6960         | 851.4006       | 426.2039         | <b>8</b>  |
| 8  | <b>102.0550</b> | 944.4207        | 472.7140        | 927.3942       | 464.2007         | <b>926.4102</b> | 463.7087         | <b>E</b> | <b>755.3682</b>  | 378.1878        | 738.3417        | 369.6745         | 737.3577       | 369.1825         | <b>7</b>  |
| 9  | 56.0495         | 1027.4579       | 514.2326        | 1010.4313      | 505.7193         | 1009.4473       | 505.2273         | <b>M</b> | <b>626.3257</b>  | 313.6665        | 609.2991        | 305.1532         |                |                  | <b>6</b>  |
| 10 | 101.0709        | 1155.5164       | 578.2619        | 1138.4899      | 569.7486         | 1137.5059       | 569.2566         | <b>Q</b> | 543.2885         | 272.1479        | <b>526.2620</b> | 263.6346         |                |                  | <b>5</b>  |
| 11 | 70.0651         | 1252.5692       | 626.7882        | 1235.5426      | 618.2750         | 1234.5586       | 617.7830         | <b>P</b> | <b>415.2300</b>  | 208.1186        | <b>398.2034</b> | 199.6053         |                |                  | <b>4</b>  |
| 12 | 87.0553         | 1366.6121       | 683.8097        | 1349.5856      | 675.2964         | 1348.6016       | 674.8044         | <b>N</b> | 318.1772         | 159.5922        | 301.1506        | 151.0790         |                |                  | <b>3</b>  |
| 13 | 30.0338         | 1423.6336       | 712.3204        | 1406.6070      | 703.8072         | 1405.6230       | 703.3151         | <b>G</b> | <b>204.1343</b>  | 102.5708        | 187.1077        | 94.0575          |                |                  | <b>2</b>  |
| 14 | 101.1073        |                 |                 |                |                  |                 |                  | <b>K</b> | <b>147.1128</b>  | 74.0600         | 130.0863        | 65.5468          |                |                  | <b>1</b>  |

MS/MS Fragmentation of **STDYGIFQINSR**

Found in **P61626**, P61626|LYSC\_HUMAN Lysozyme C OS=Homo sapiens GN=LYZ PE=1 SV=1

Match to Query 563: 1399.674328 from(700.844440,2+)

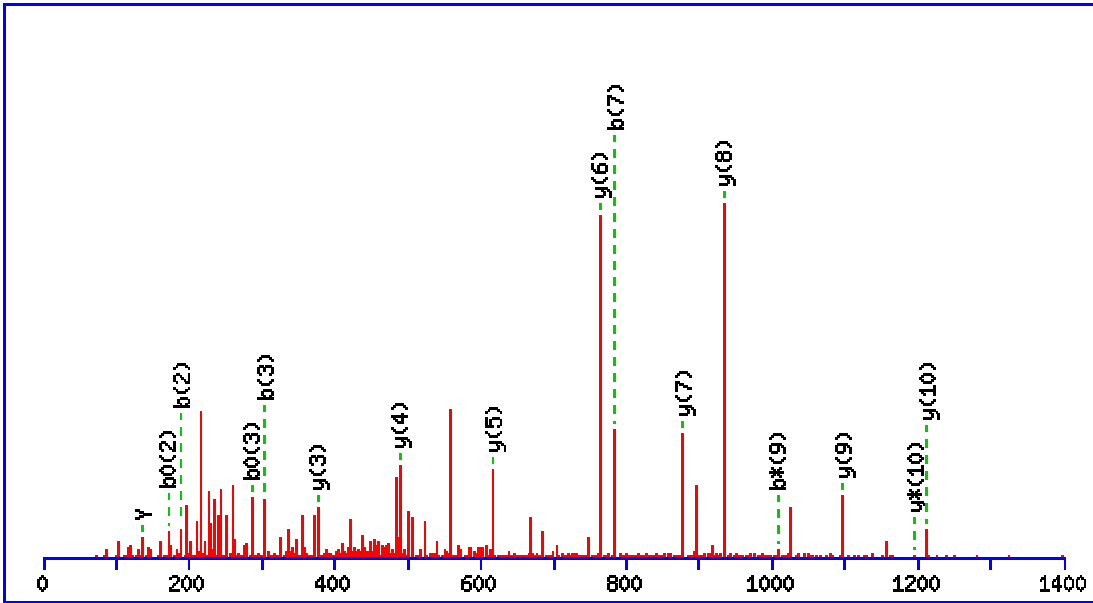

Monoisotopic mass of neutral peptide  $M_r(\text{calc})$ : 1399.6732

Fixed modifications: Carbamidomethyl (C)

Ions Score: 51 Expect: 0.00053

Matches (**Bold Red**): 16/128 fragment ions using 35 most intense peaks

| #  | Immon.          | b               | b <sup>++</sup> | b*               | b <sup>***</sup> | b <sup>0</sup>  | b <sup>0++</sup> | Seq. | y                | y <sup>++</sup> | y*               | y <sup>***</sup> | y <sup>0</sup> | y <sup>0++</sup> | #  |
|----|-----------------|-----------------|-----------------|------------------|------------------|-----------------|------------------|------|------------------|-----------------|------------------|------------------|----------------|------------------|----|
| 1  | 60.0444         | 88.0393         | 44.5233         |                  |                  | 70.0287         | 35.5180          | S    |                  |                 |                  |                  |                |                  | 12 |
| 2  | 74.0600         | <b>189.0870</b> | 95.0471         |                  |                  | <b>171.0764</b> | 86.0418          | T    | 1313.6484        | 657.3279        | 1296.6219        | 648.8146         | 1295.6379      | 648.3226         | 11 |
| 3  | 88.0393         | <b>304.1139</b> | 152.5606        |                  |                  | <b>286.1034</b> | 143.5553         | D    | <b>1212.6008</b> | 606.8040        | <b>1195.5742</b> | 598.2907         | 1194.5902      | 597.7987         | 10 |
| 4  | <b>136.0757</b> | 467.1773        | 234.0923        |                  |                  | 449.1667        | 225.0870         | Y    | <b>1097.5738</b> | 549.2905        | 1080.5473        | 540.7773         | 1079.5633      | 540.2853         | 9  |
| 5  | 30.0338         | 524.1987        | 262.6030        |                  |                  | 506.1882        | 253.5977         | G    | <b>934.5105</b>  | 467.7589        | 917.4839         | 459.2456         | 916.4999       | 458.7536         | 8  |
| 6  | 86.0964         | 637.2828        | 319.1450        |                  |                  | 619.2722        | 310.1397         | I    | <b>877.4890</b>  | 439.2482        | 860.4625         | 430.7349         | 859.4785       | 430.2429         | 7  |
| 7  | 120.0808        | <b>784.3512</b> | 392.6792        |                  |                  | 766.3406        | 383.6740         | F    | <b>764.4050</b>  | 382.7061        | 747.3784         | 374.1928         | 746.3944       | 373.7008         | 6  |
| 8  | 101.0709        | 912.4098        | 456.7085        | 895.3832         | 448.1953         | 894.3992        | 447.7032         | Q    | <b>617.3365</b>  | 309.1719        | 600.3100         | 300.6586         | 599.3260       | 300.1666         | 5  |
| 9  | 86.0964         | 1025.4938       | 513.2506        | <b>1008.4673</b> | 504.7373         | 1007.4833       | 504.2453         | I    | <b>489.2780</b>  | 245.1426        | 472.2514         | 236.6293         | 471.2674       | 236.1373         | 4  |
| 10 | 87.0553         | 1139.5368       | 570.2720        | 1122.5102        | 561.7587         | 1121.5262       | 561.2667         | N    | <b>376.1939</b>  | 188.6006        | 359.1674         | 180.0873         | 358.1833       | 179.5953         | 3  |
| 11 | 60.0444         | 1226.5688       | 613.7880        | 1209.5422        | 605.2748         | 1208.5582       | 604.7828         | S    | 262.1510         | 131.5791        | 245.1244         | 123.0659         | 244.1404       | 122.5738         | 2  |
| 12 | 129.1135        |                 |                 |                  |                  |                 |                  | R    | 175.1190         | 88.0631         | 158.0924         | 79.5498          |                |                  | 1  |

MS/MS Fragmentation of **MNPQSAFFQGK**

Found in **P22307**, P22307|NLTP\_HUMAN Non-specific lipid-transfer protein OS=Homo sapiens GN=SCP2 PE=1 SV=2

Match to Query 161: 1269.497410 from(635.755981,2,+)

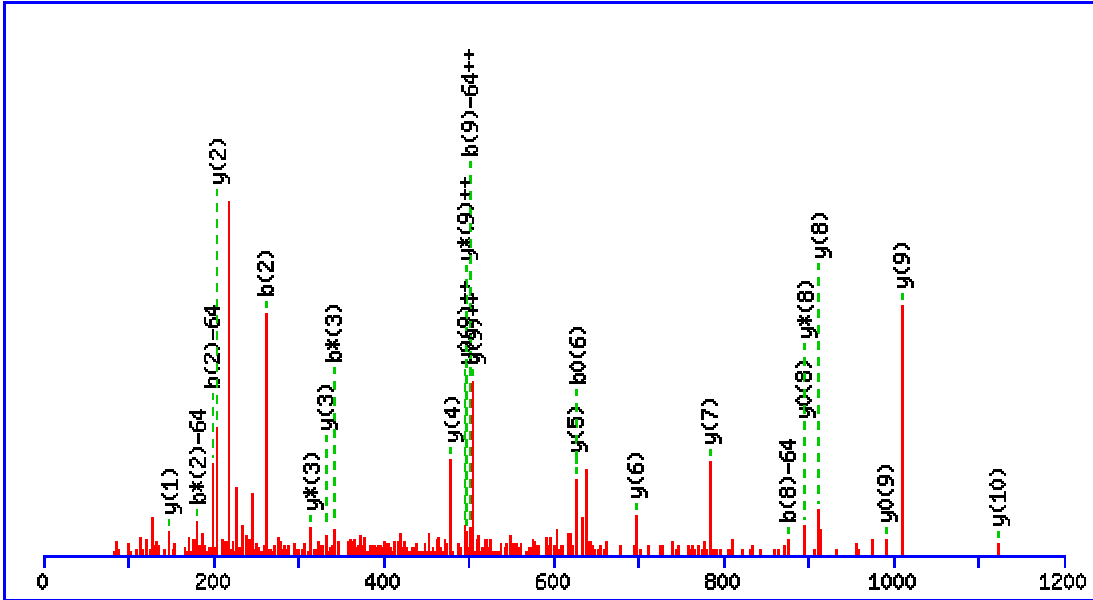

Monoisotopic mass of neutral peptide  $M_r(\text{calc})$ : 1269.5812

Fixed modifications: Carbamidomethyl (C)

Variable modifications:

M1 : Oxidation (M), with neutral losses 63.9983(shown in table), 0.0000

Ions Score: 58 Expect: 0.00011

Matches (Bold Red): 24/160 fragment ions using 51 most intense peaks

| #  | Immon.   | b               | b <sup>++</sup> | b <sup>*</sup>  | b <sup>*++</sup> | b <sup>0</sup> | b <sup>0++</sup> | Seq. | y                | y <sup>++</sup> | y <sup>*</sup>  | y <sup>*++</sup> | y <sup>0</sup>  | y <sup>0++</sup> | #  |
|----|----------|-----------------|-----------------|-----------------|------------------|----------------|------------------|------|------------------|-----------------|-----------------|------------------|-----------------|------------------|----|
| 1  | 56.0495  | 84.0444         | 42.5258         |                 |                  |                |                  | M    |                  |                 |                 |                  |                 |                  | 11 |
| 2  | 87.0553  | <b>198.0873</b> | 99.5473         | <b>181.0608</b> | 91.0340          |                |                  | N    | <b>1123.5531</b> | 562.2802        | 1106.5265       | 553.7669         | 1105.5425       | 553.2749         | 10 |
| 3  | 70.0651  | 295.1401        | 148.0737        | 278.1135        | 139.5604         |                |                  | P    | <b>1009.5102</b> | <b>505.2587</b> | 992.4836        | <b>496.7454</b>  | <b>991.4996</b> | <b>496.2534</b>  | 9  |
| 4  | 101.0709 | 423.1987        | 212.1030        | 406.1721        | 203.5897         |                |                  | Q    | <b>912.4574</b>  | 456.7323        | <b>895.4308</b> | 448.2191         | <b>894.4468</b> | 447.7271         | 8  |
| 5  | 60.0444  | 510.2307        | 255.6190        | 493.2041        | 247.1057         | 492.2201       | 246.6137         | S    | <b>784.3988</b>  | 392.7030        | 767.3723        | 384.1898         | 766.3883        | 383.6978         | 7  |
| 6  | 44.0495  | 581.2678        | 291.1375        | 564.2413        | 282.6243         | 563.2572       | 282.1323         | A    | <b>697.3668</b>  | 349.1870        | 680.3402        | 340.6738         |                 |                  | 6  |
| 7  | 120.0808 | 728.3362        | 364.6717        | 711.3097        | 356.1585         | 710.3257       | 355.6665         | F    | <b>626.3297</b>  | 313.6685        | 609.3031        | 305.1552         |                 |                  | 5  |
| 8  | 120.0808 | <b>875.4046</b> | 438.2060        | 858.3781        | 429.6927         | 857.3941       | 429.2007         | F    | <b>479.2613</b>  | 240.1343        | 462.2347        | 231.6210         |                 |                  | 4  |
| 9  | 101.0709 | 1003.4632       | <b>502.2352</b> | 986.4367        | 493.7220         | 985.4526       | 493.2300         | Q    | <b>332.1928</b>  | 166.6001        | <b>315.1663</b> | 158.0868         |                 |                  | 3  |
| 10 | 30.0338  | 1060.4847       | 530.7460        | 1043.4581       | 522.2327         | 1042.4741      | 521.7407         | G    | <b>204.1343</b>  | 102.5708        | 187.1077        | 94.0575          |                 |                  | 2  |
| 11 | 101.1073 |                 |                 |                 |                  |                |                  | K    | <b>147.1128</b>  | 74.0600         | 130.0863        | 65.5468          |                 |                  | 1  |

MS/MS Fragmentation of **TLNAGAYSK**

Found in **P50897**, P50897|PPT1\_HUMAN Palmitoyl-protein thioesterase 1 OS=Homo sapiens GN=PPT1 PE=1 SV=1

Match to Query 316: 923.460238 from(462.737395,2+)

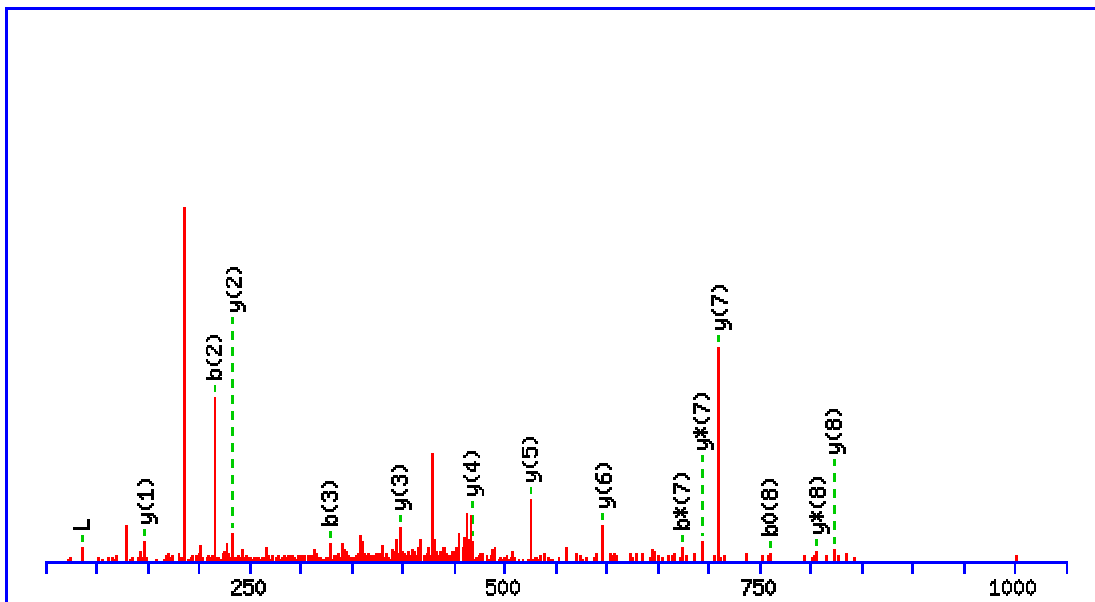

Monoisotopic mass of neutral peptide Mr(calc): 923.4712

Fixed modifications: Carbamidomethyl (C)

Ions Score: 40 Expect: 0.0061

Matches (Bold Red): 15/99 fragment ions using 35 most intense peaks

| # | Immon.         | b               | b <sup>++</sup> | b*              | b <sup>***</sup> | b <sup>0</sup>  | b <sup>0++</sup> | Seq. | y               | y <sup>++</sup> | y*              | y <sup>***</sup> | y <sup>0</sup> | y <sup>0++</sup> | # |
|---|----------------|-----------------|-----------------|-----------------|------------------|-----------------|------------------|------|-----------------|-----------------|-----------------|------------------|----------------|------------------|---|
| 1 | 74.0600        | 102.0550        | 51.5311         |                 |                  | 84.0444         | 42.5258          | T    |                 |                 |                 |                  |                |                  | 9 |
| 2 | <b>86.0964</b> | <b>215.1390</b> | 108.0731        |                 |                  | 197.1285        | 99.0679          | L    | <b>823.4308</b> | 412.2191        | <b>806.4043</b> | 403.7058         | 805.4203       | 403.2138         | 8 |
| 3 | 87.0553        | <b>329.1819</b> | 165.0946        | 312.1554        | 156.5813         | 311.1714        | 156.0893         | N    | <b>710.3468</b> | 355.6770        | <b>693.3202</b> | 347.1638         | 692.3362       | 346.6717         | 7 |
| 4 | 44.0495        | 400.2191        | 200.6132        | 383.1925        | 192.0999         | 382.2085        | 191.6079         | A    | <b>596.3039</b> | 298.6556        | 579.2773        | 290.1423         | 578.2933       | 289.6503         | 6 |
| 5 | 30.0338        | 457.2405        | 229.1239        | 440.2140        | 220.6106         | 439.2300        | 220.1186         | G    | <b>525.2667</b> | 263.1370        | 508.2402        | 254.6237         | 507.2562       | 254.1317         | 5 |
| 6 | 44.0495        | 528.2776        | 264.6425        | 511.2511        | 256.1292         | 510.2671        | 255.6372         | A    | <b>468.2453</b> | 234.6263        | 451.2187        | 226.1130         | 450.2347       | 225.6210         | 4 |
| 7 | 136.0757       | 691.3410        | 346.1741        | <b>674.3144</b> | 337.6608         | 673.3304        | 337.1688         | Y    | <b>397.2082</b> | 199.1077        | 380.1816        | 190.5944         | 379.1976       | 190.1024         | 3 |
| 8 | 60.0444        | 778.3730        | 389.6901        | 761.3464        | 381.1769         | <b>760.3624</b> | 380.6849         | S    | <b>234.1448</b> | 117.5761        | 217.1183        | 109.0628         | 216.1343       | 108.5708         | 2 |
| 9 | 101.1073       |                 |                 |                 |                  |                 |                  | K    | <b>147.1128</b> | 74.0600         | 130.0863        | 65.5468          |                |                  | 1 |

MS/MS Fragmentation of **QPVLSQTEAR**

Found in **P28070**, P28070|PSB4\_HUMAN Proteasome subunit beta type-4 OS=Homo sapiens GN=PSMB4 PE=1 SV=4

Match to Query 251: 1127.518390 from(564.766471,2,+)

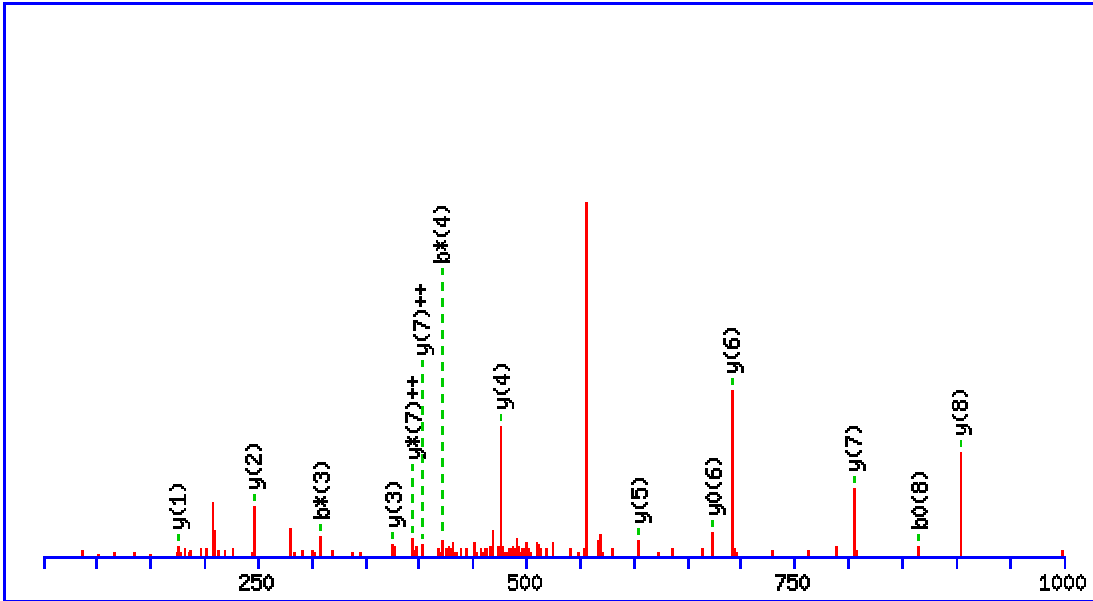

Monoisotopic mass of neutral peptide Mr(calc): 1127.5935

Fixed modifications: Carbamidomethyl (C)

Ions Score: 61 Expect: 6.2e-005

Matches (Bold Red): 14/106 fragment ions using 28 most intense peaks

| #  | Immon.   | b        | b <sup>++</sup> | b*              | b <sup>+++</sup> | b <sup>0</sup>  | b <sup>0++</sup> | Seq. | y               | y <sup>++</sup> | y*       | y <sup>+++</sup> | y <sup>0</sup>  | y <sup>0++</sup> | #  |
|----|----------|----------|-----------------|-----------------|------------------|-----------------|------------------|------|-----------------|-----------------|----------|------------------|-----------------|------------------|----|
| 1  | 101.0709 | 129.0659 | 65.0366         | 112.0393        | 56.5233          |                 |                  | Q    |                 |                 |          |                  |                 |                  | 10 |
| 2  | 70.0651  | 226.1186 | 113.5629        | 209.0921        | 105.0497         |                 |                  | P    | 1000.5422       | 500.7747        | 983.5156 | 492.2615         | 982.5316        | 491.7694         | 9  |
| 3  | 72.0808  | 325.1870 | 163.0972        | <b>308.1605</b> | 154.5839         |                 |                  | V    | <b>903.4894</b> | 452.2483        | 886.4629 | 443.7351         | 885.4789        | 443.2431         | 8  |
| 4  | 86.0964  | 438.2711 | 219.6392        | <b>421.2445</b> | 211.1259         |                 |                  | L    | <b>804.4210</b> | <b>402.7141</b> | 787.3945 | <b>394.2009</b>  | 786.4104        | 393.7089         | 7  |
| 5  | 60.0444  | 525.3031 | 263.1552        | 508.2766        | 254.6419         | 507.2926        | 254.1499         | S    | <b>691.3369</b> | 346.1721        | 674.3104 | 337.6588         | <b>673.3264</b> | 337.1668         | 6  |
| 6  | 101.0709 | 653.3617 | 327.1845        | 636.3352        | 318.6712         | 635.3511        | 318.1792         | Q    | <b>604.3049</b> | 302.6561        | 587.2784 | 294.1428         | 586.2944        | 293.6508         | 5  |
| 7  | 74.0600  | 754.4094 | 377.7083        | 737.3828        | 369.1951         | 736.3988        | 368.7030         | T    | <b>476.2463</b> | 238.6268        | 459.2198 | 230.1135         | 458.2358        | 229.6215         | 4  |
| 8  | 102.0550 | 883.4520 | 442.2296        | 866.4254        | 433.7164         | <b>865.4414</b> | 433.2243         | E    | <b>375.1987</b> | 188.1030        | 358.1721 | 179.5897         | 357.1881        | 179.0977         | 3  |
| 9  | 44.0495  | 954.4891 | 477.7482        | 937.4625        | 469.2349         | 936.4785        | 468.7429         | A    | <b>246.1561</b> | 123.5817        | 229.1295 | 115.0684         |                 |                  | 2  |
| 10 | 129.1135 |          |                 |                 |                  |                 |                  | R    | <b>175.1190</b> | 88.0631         | 158.0924 | 79.5498          |                 |                  | 1  |



MS/MS Fragmentation of **NEPQNATGAPGR**

Found in **P51148**, P51148|RAB5C\_HUMAN Ras-related protein Rab-5C OS=Homo sapiens GN=RAB5C  
 PE=1 SV=2

Match to Query 268: 1210.501952 from(606.258252,2+)

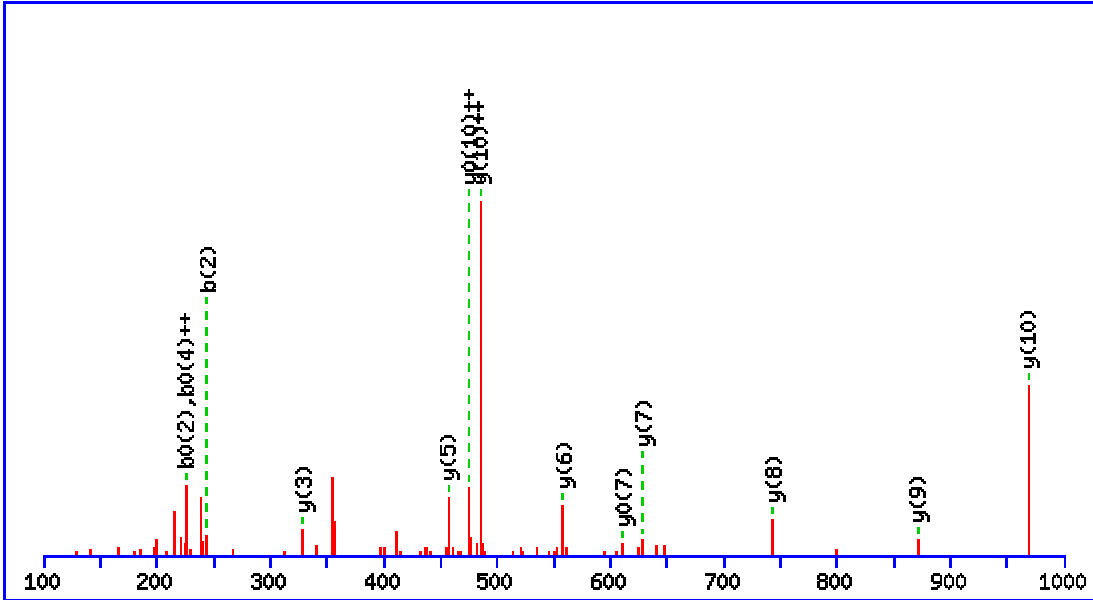

Monoisotopic mass of neutral peptide Mr(calc): 1210.5690

Fixed modifications: Carbamidomethyl (C)

Ions Score: 39 Expect: 0.008

Matches (Bold Red): 13/132 fragment ions using 22 most intense peaks

| #  | Immon.   | b               | b <sup>++</sup> | b*        | b <sup>*++</sup> | b <sup>0</sup>  | b <sup>0++</sup> | Seq. | y               | y <sup>++</sup> | y*        | y <sup>*++</sup> | y <sup>0</sup>  | y <sup>0++</sup> | #  |
|----|----------|-----------------|-----------------|-----------|------------------|-----------------|------------------|------|-----------------|-----------------|-----------|------------------|-----------------|------------------|----|
| 1  | 87.0553  | 115.0502        | 58.0287         | 98.0237   | 49.5155          |                 |                  | N    |                 |                 |           |                  |                 |                  | 12 |
| 2  | 102.0550 | <b>244.0928</b> | 122.5500        | 227.0662  | 114.0368         | <b>226.0822</b> | 113.5448         | E    | 1097.5334       | 549.2703        | 1080.5069 | 540.7571         | 1079.5228       | 540.2651         | 11 |
| 3  | 70.0651  | 341.1456        | 171.0764        | 324.1190  | 162.5631         | 323.1350        | 162.0711         | P    | <b>968.4908</b> | <b>484.7490</b> | 951.4643  | 476.2358         | 950.4803        | <b>475.7438</b>  | 10 |
| 4  | 101.0709 | 469.2041        | 235.1057        | 452.1776  | 226.5924         | 451.1936        | <b>226.1004</b>  | Q    | <b>871.4381</b> | 436.2227        | 854.4115  | 427.7094         | 853.4275        | 427.2174         | 9  |
| 5  | 87.0553  | 583.2471        | 292.1272        | 566.2205  | 283.6139         | 565.2365        | 283.1219         | N    | <b>743.3795</b> | 372.1934        | 726.3529  | 363.6801         | 725.3689        | 363.1881         | 8  |
| 6  | 44.0495  | 654.2842        | 327.6457        | 637.2576  | 319.1325         | 636.2736        | 318.6404         | A    | <b>629.3366</b> | 315.1719        | 612.3100  | 306.6586         | <b>611.3260</b> | 306.1666         | 7  |
| 7  | 74.0600  | 755.3319        | 378.1696        | 738.3053  | 369.6563         | 737.3213        | 369.1643         | T    | <b>558.2994</b> | 279.6534        | 541.2729  | 271.1401         | 540.2889        | 270.6481         | 6  |
| 8  | 30.0338  | 812.3533        | 406.6803        | 795.3268  | 398.1670         | 794.3428        | 397.6750         | G    | <b>457.2518</b> | 229.1295        | 440.2252  | 220.6162         |                 |                  | 5  |
| 9  | 44.0495  | 883.3904        | 442.1989        | 866.3639  | 433.6856         | 865.3799        | 433.1936         | A    | 400.2303        | 200.6188        | 383.2037  | 192.1055         |                 |                  | 4  |
| 10 | 70.0651  | 980.4432        | 490.7252        | 963.4167  | 482.2120         | 962.4326        | 481.7200         | P    | <b>329.1932</b> | 165.1002        | 312.1666  | 156.5870         |                 |                  | 3  |
| 11 | 30.0338  | 1037.4647       | 519.2360        | 1020.4381 | 510.7227         | 1019.4541       | 510.2307         | G    | 232.1404        | 116.5738        | 215.1139  | 108.0606         |                 |                  | 2  |
| 12 | 129.1135 |                 |                 |           |                  |                 |                  | R    | 175.1190        | 88.0631         | 158.0924  | 79.5498          |                 |                  | 1  |

MS/MS Fragmentation of **TPFLLSGTSYK**

Found in **P55084**, P55084|ECHB\_HUMAN Trifunctional enzyme subunit beta, mitochondrial OS=Homo sapiens GN=HADHB PE=1 SV=3

Match to Query 330: 1212.721594 from(607.368073,2,+)

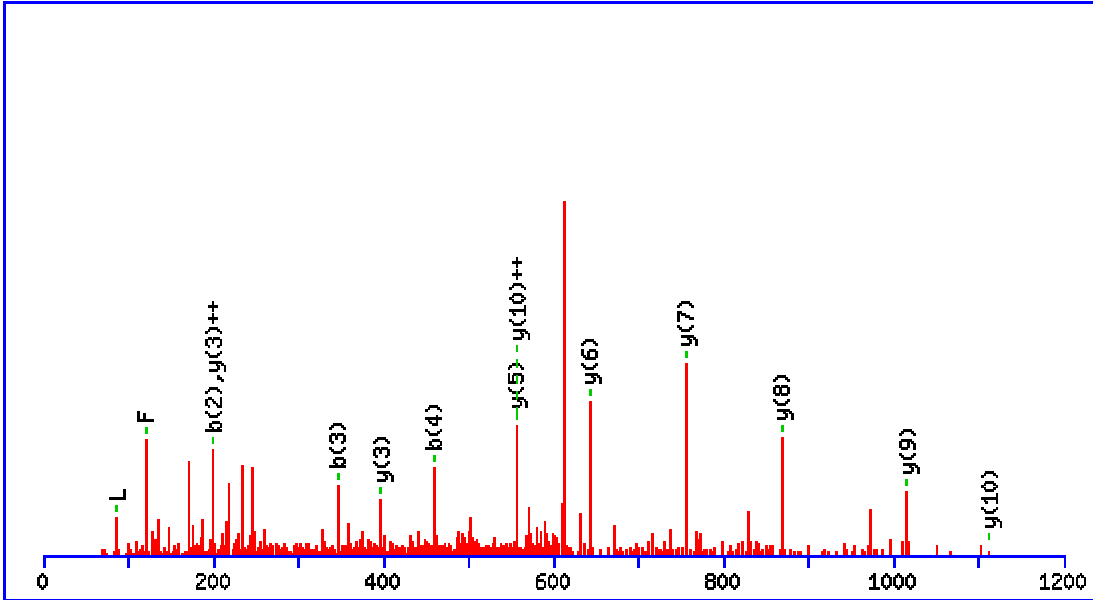

**Monoisotopic mass of neutral peptide Mr(calc):** 1212.6390

**Fixed modifications:** Carbamidomethyl (C)

**Ions Score:** 52 **Expect:** 0.00049

**Matches (Bold Red):** 15/107 fragment ions using 31 most intense peaks

| #  | Immon.          | b               | b <sup>++</sup> | b <sup>0</sup> | b <sup>0++</sup> | Seq.     | y                | y <sup>++</sup> | y <sup>*</sup> | y <sup>*++</sup> | y <sup>0</sup> | y <sup>0++</sup> | #         |
|----|-----------------|-----------------|-----------------|----------------|------------------|----------|------------------|-----------------|----------------|------------------|----------------|------------------|-----------|
| 1  | 74.0600         | 102.0550        | 51.5311         | 84.0444        | 42.5258          | <b>T</b> |                  |                 |                |                  |                |                  | <b>11</b> |
| 2  | 70.0651         | <b>199.1077</b> | 100.0575        | 181.0972       | 91.0522          | <b>P</b> | <b>1112.5986</b> | <b>556.8030</b> | 1095.5721      | 548.2897         | 1094.5881      | 547.7977         | <b>10</b> |
| 3  | <b>120.0808</b> | <b>346.1761</b> | 173.5917        | 328.1656       | 164.5864         | <b>F</b> | <b>1015.5459</b> | 508.2766        | 998.5193       | 499.7633         | 997.5353       | 499.2713         | <b>9</b>  |
| 4  | <b>86.0964</b>  | <b>459.2602</b> | 230.1337        | 441.2496       | 221.1285         | <b>L</b> | <b>868.4775</b>  | 434.7424        | 851.4509       | 426.2291         | 850.4669       | 425.7371         | <b>8</b>  |
| 5  | <b>86.0964</b>  | 572.3443        | 286.6758        | 554.3337       | 277.6705         | <b>L</b> | <b>755.3934</b>  | 378.2003        | 738.3668       | 369.6871         | 737.3828       | 369.1951         | <b>7</b>  |
| 6  | 60.0444         | 659.3763        | 330.1918        | 641.3657       | 321.1865         | <b>S</b> | <b>642.3093</b>  | 321.6583        | 625.2828       | 313.1450         | 624.2988       | 312.6530         | <b>6</b>  |
| 7  | 30.0338         | 716.3978        | 358.7025        | 698.3872       | 349.6972         | <b>G</b> | <b>555.2773</b>  | 278.1423        | 538.2508       | 269.6290         | 537.2667       | 269.1370         | <b>5</b>  |
| 8  | 74.0600         | 817.4454        | 409.2264        | 799.4349       | 400.2211         | <b>T</b> | 498.2558         | 249.6316        | 481.2293       | 241.1183         | 480.2453       | 240.6263         | <b>4</b>  |
| 9  | 60.0444         | 904.4775        | 452.7424        | 886.4669       | 443.7371         | <b>S</b> | <b>397.2082</b>  | <b>199.1077</b> | 380.1816       | 190.5944         | 379.1976       | 190.1024         | <b>3</b>  |
| 10 | 136.0757        | 1067.5408       | 534.2740        | 1049.5302      | 525.2688         | <b>Y</b> | 310.1761         | 155.5917        | 293.1496       | 147.0784         |                |                  | <b>2</b>  |
| 11 | 101.1073        |                 |                 |                |                  | <b>K</b> | 147.1128         | 74.0600         | 130.0863       | 65.5468          |                |                  | <b>1</b>  |

MS/MS Fragmentation of **FADLSEAANR**

Found in **P08670**, P08670|VIME\_HUMAN Vimentin OS=Homo sapiens GN=VIM PE=1 SV=4

Match to Query 360: 1092.507450 from(547.261001,2+)

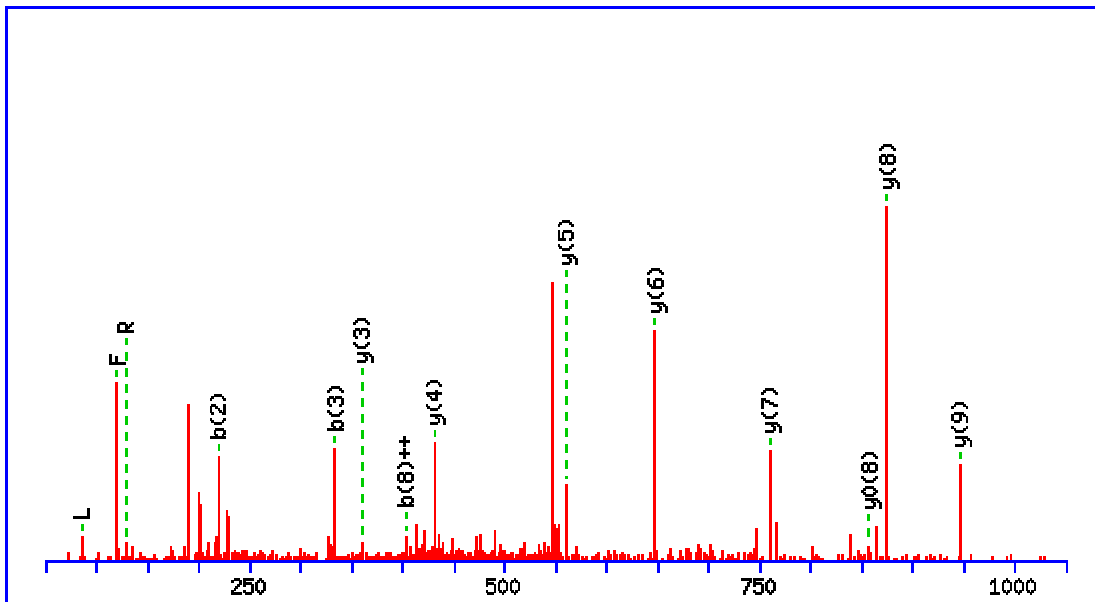

**Monoisotopic mass of neutral peptide Mr(calc):** 1092.5200

**Fixed modifications:** Carbamidomethyl (C)

**Ions Score:** 39 **Expect:** 0.0081

**Matches (Bold Red):** 14/90 fragment ions using 40 most intense peaks

| #  | Immon.          | b               | b <sup>++</sup> | b <sup>*</sup> | b <sup>*++</sup> | b <sup>0</sup> | b <sup>0++</sup> | Seq. | y               | y <sup>++</sup> | y <sup>*</sup> | y <sup>*++</sup> | y <sup>0</sup>  | y <sup>0++</sup> | #  |
|----|-----------------|-----------------|-----------------|----------------|------------------|----------------|------------------|------|-----------------|-----------------|----------------|------------------|-----------------|------------------|----|
| 1  | <b>120.0808</b> | 148.0757        | 74.5415         |                |                  |                |                  | F    |                 |                 |                |                  |                 |                  | 10 |
| 2  | 44.0495         | <b>219.1128</b> | 110.0600        |                |                  |                |                  | A    | <b>946.4588</b> | 473.7331        | 929.4323       | 465.2198         | 928.4483        | 464.7278         | 9  |
| 3  | 88.0393         | <b>334.1397</b> | 167.5735        |                |                  | 316.1292       | 158.5682         | D    | <b>875.4217</b> | 438.2145        | 858.3952       | 429.7012         | <b>857.4112</b> | 429.2092         | 8  |
| 4  | <b>86.0964</b>  | 447.2238        | 224.1155        |                |                  | 429.2132       | 215.1103         | L    | <b>760.3948</b> | 380.7010        | 743.3682       | 372.1878         | 742.3842        | 371.6958         | 7  |
| 5  | 60.0444         | 534.2558        | 267.6316        |                |                  | 516.2453       | 258.6263         | S    | <b>647.3107</b> | 324.1590        | 630.2842       | 315.6457         | 629.3002        | 315.1537         | 6  |
| 6  | 102.0550        | 663.2984        | 332.1529        |                |                  | 645.2879       | 323.1476         | E    | <b>560.2787</b> | 280.6430        | 543.2522       | 272.1297         | 542.2681        | 271.6377         | 5  |
| 7  | 44.0495         | 734.3355        | 367.6714        |                |                  | 716.3250       | 358.6661         | A    | <b>431.2361</b> | 216.1217        | 414.2096       | 207.6084         |                 |                  | 4  |
| 8  | 44.0495         | 805.3727        | <b>403.1900</b> |                |                  | 787.3621       | 394.1847         | A    | <b>360.1990</b> | 180.6031        | 343.1724       | 172.0899         |                 |                  | 3  |
| 9  | 87.0553         | 919.4156        | 460.2114        | 902.3890       | 451.6982         | 901.4050       | 451.2061         | N    | 289.1619        | 145.0846        | 272.1353       | 136.5713         |                 |                  | 2  |
| 10 | <b>129.1135</b> |                 |                 |                |                  |                |                  | R    | 175.1190        | 88.0631         | 158.0924       | 79.5498          |                 |                  | 1  |

MS/MS Fragmentation of **LTLSALVDGK**

Found in **P45880**, P45880|VDAC2\_HUMAN Voltage-dependent anion-selective channel protein 2 OS=Homo sapiens GN=VDAC2 PE=1 SV=2

Match to Query 201: 1015.633952 from(508.824252,2+)

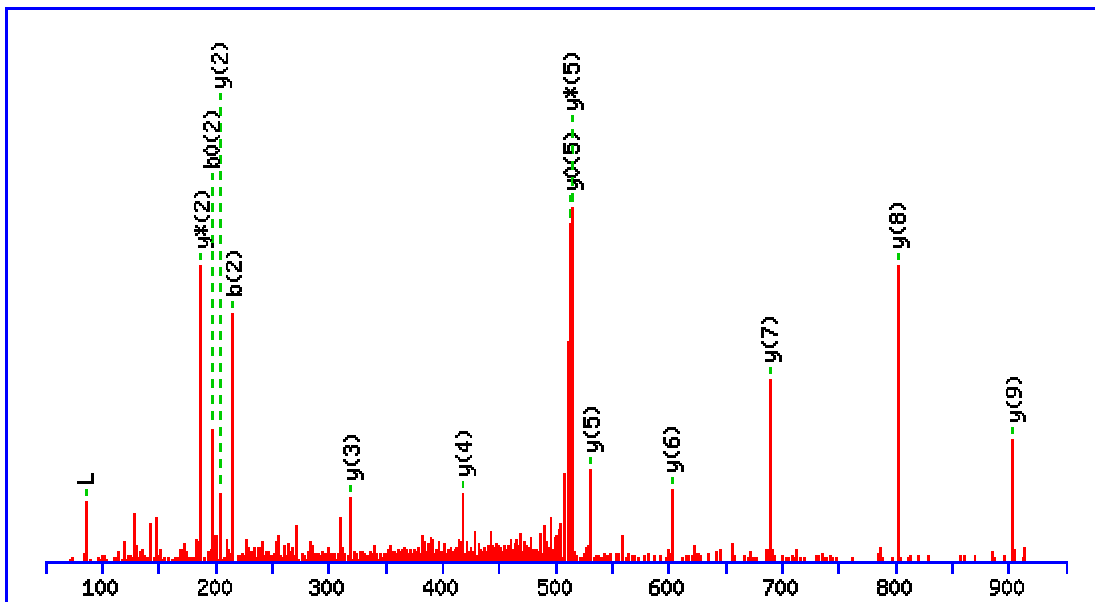

Monoisotopic mass of neutral peptide Mr(calc): 1015.5914

Fixed modifications: Carbamidomethyl (C)

Ions Score: 62 Expect: 5.3e-005

Matches (Bold Red): 16/94 fragment ions using 17 most intense peaks

| #  | Immon.         | b               | b <sup>++</sup> | b <sup>0</sup>  | b <sup>0++</sup> | Seq. | y               | y <sup>++</sup> | y <sup>*</sup>  | y <sup>*++</sup> | y <sup>0</sup>  | y <sup>0++</sup> | #  |
|----|----------------|-----------------|-----------------|-----------------|------------------|------|-----------------|-----------------|-----------------|------------------|-----------------|------------------|----|
| 1  | <b>86.0964</b> | 114.0913        | 57.5493         |                 |                  | L    |                 |                 |                 |                  |                 |                  | 10 |
| 2  | 74.0600        | <b>215.1390</b> | 108.0731        | <b>197.1285</b> | 99.0679          | T    | <b>903.5146</b> | 452.2609        | 886.4880        | 443.7477         | 885.5040        | 443.2556         | 9  |
| 3  | <b>86.0964</b> | 328.2231        | 164.6152        | 310.2125        | 155.6099         | L    | <b>802.4669</b> | 401.7371        | 785.4403        | 393.2238         | 784.4563        | 392.7318         | 8  |
| 4  | 60.0444        | 415.2551        | 208.1312        | 397.2445        | 199.1259         | S    | <b>689.3828</b> | 345.1951        | 672.3563        | 336.6818         | 671.3723        | 336.1898         | 7  |
| 5  | 44.0495        | 486.2922        | 243.6498        | 468.2817        | 234.6445         | A    | <b>602.3508</b> | 301.6790        | 585.3243        | 293.1658         | 584.3402        | 292.6738         | 6  |
| 6  | <b>86.0964</b> | 599.3763        | 300.1918        | 581.3657        | 291.1865         | L    | <b>531.3137</b> | 266.1605        | <b>514.2871</b> | 257.6472         | <b>513.3031</b> | 257.1552         | 5  |
| 7  | 72.0808        | 698.4447        | 349.7260        | 680.4341        | 340.7207         | V    | <b>418.2296</b> | 209.6185        | 401.2031        | 201.1052         | 400.2191        | 200.6132         | 4  |
| 8  | 88.0393        | 813.4716        | 407.2395        | 795.4611        | 398.2342         | D    | <b>319.1612</b> | 160.0842        | 302.1347        | 151.5710         | 301.1506        | 151.0790         | 3  |
| 9  | 30.0338        | 870.4931        | 435.7502        | 852.4825        | 426.7449         | G    | <b>204.1343</b> | 102.5708        | <b>187.1077</b> | 94.0575          |                 |                  | 2  |
| 10 | 101.1073       |                 |                 |                 |                  | K    | 147.1128        | 74.0600         | 130.0863        | 65.5468          |                 |                  | 1  |
